# Supplementary material for: High prevalence of burnout syndrome among medical and nonmedical residents during the COVID-19 pandemic
Source: PLoS One. 2022 Nov 22;17(11):e0267530. doi: 10.1371/journal.pone.0267530 (PMC9681108; doi:10.1371/journal.pone.0267530)
Supplement: S1 File — (PDF) [file pone.0267530.s002.pdf]

```

GET
FILE='C:\Users\User\Documents\Pesquisa\Fellow\FellowGenData_V1.sav'.
DATASET NAME ConjuntodeDados1 WINDOW=FRONT.
FREQUENCIES VARIABLES=Sex Race ComorbAny HRiskFactor EBSEH FinSupp UnivHosp RsPrgType ProfCateg
MDSpecBA
/ARCHART PERCENT
/ORDER=ANALYSIS.

FREQUENCIES VARIABLES=Sex Race ComorbAny HRiskFactor EBSEH FinSupp UnivHosp RsPrgType ProfCateg
MDSpecBA
/ARCHART PERCENT
/ORDER=VARIABLE.

```

Frequências

| Observações                |                                             |                                                                                                                                            |
|----------------------------|---------------------------------------------|--------------------------------------------------------------------------------------------------------------------------------------------|
| Saída criada               |                                             | 20-SEP-2020 11:16:53                                                                                                                       |
| Comentários                |                                             |                                                                                                                                            |
| Entrada                    | Dados                                       | C:\Users\User\Documents\Pesquisa\Fellow\FellowGenData_V1.sav                                                                               |
|                            | Conjunto de dados ativo                     | ConjuntodeDados1                                                                                                                           |
|                            | Filtro                                      | <none>                                                                                                                                     |
|                            | Ponderação                                  | <none>                                                                                                                                     |
|                            | Arquivo Dividido                            | <none>                                                                                                                                     |
|                            | N de linhas em arquivo de dados de trabalho | 1313                                                                                                                                       |
|                            |                                             |                                                                                                                                            |
| Tratamento de valor omisso | Definição de omisso                         | Os valores omisso definidos pelo usuário são tratados como omisso.                                                                         |
|                            | Casos utilizados                            | As estatísticas estão baseadas em todos os casos com dados válidos.                                                                        |
| Sintaxe                    |                                             | FREQUENCIES VARIABLES=Sex Race ComorbAny HRiskFactor EBSEH FinSupp UnivHosp RsPrgType ProfCateg MDSpecBA /ARCHART PERCENT /ORDER=VARIABLE. |
| Recursos                   | Tempo do processador                        | 00:00:02,95                                                                                                                                |
|                            | Tempo decorrido                             | 00:00:01,52                                                                                                                                |

Sex

Estatísticas

Sex

|   |        |      |
|---|--------|------|
| N | Válido | 1310 |
|   | Omisso | 3    |

|        |        | Sex        |             |                    |                         |
|--------|--------|------------|-------------|--------------------|-------------------------|
|        |        | Frequência | Porcentagem | Porcentagem válida | Porcentagem acumulativa |
| Válido | Male   | 285        | 21,7        | 21,8               | 21,8                    |
|        | Female | 1025       | 78,1        | 78,2               | 100,0                   |
|        | Total  | 1310       | 99,8        | 100,0              |                         |
| Omisso | 999    | 3          | ,2          |                    |                         |
| Total  |        | 1313       | 100,0       |                    |                         |

Sex

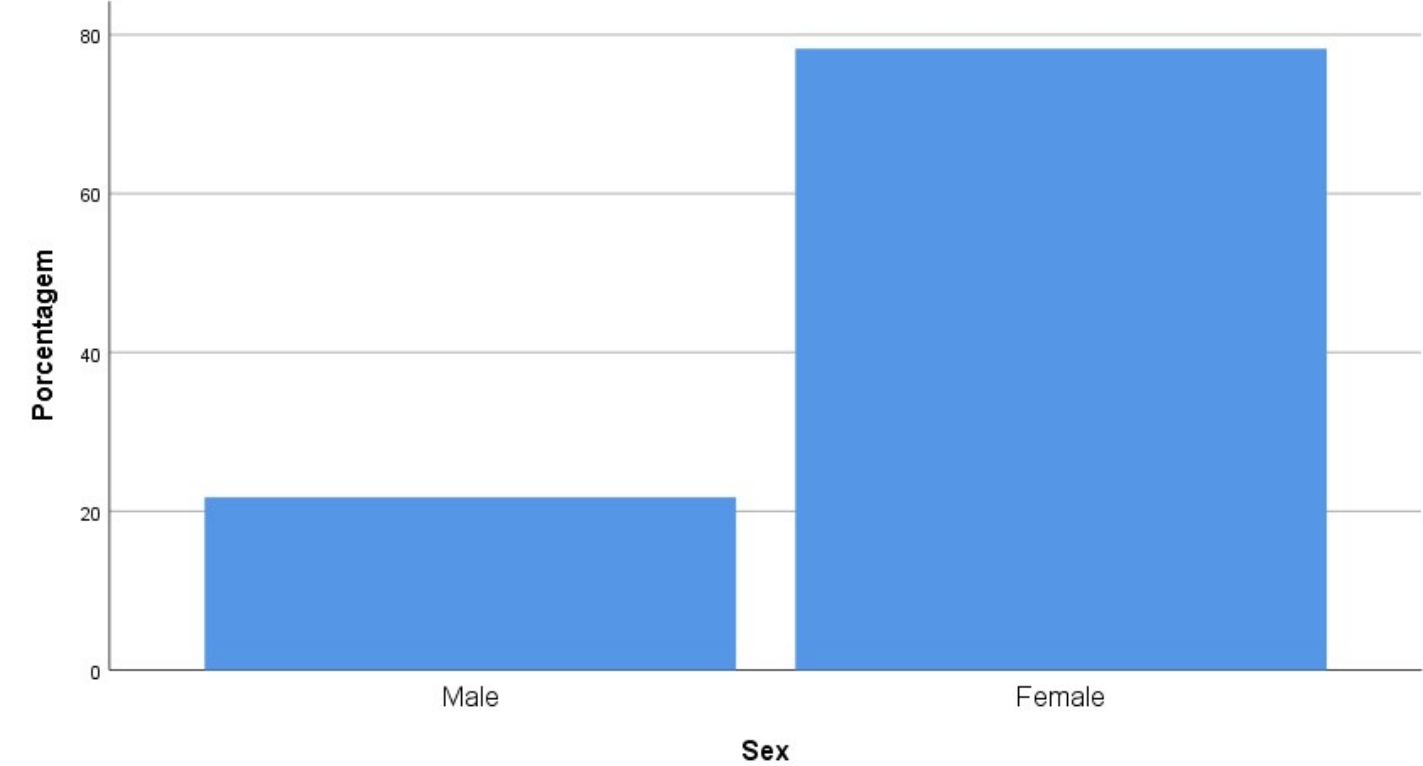

Race

Estatísticas

Race

|   |        |      |
|---|--------|------|
| N | Válido | 1313 |
|---|--------|------|

|        |   |
|--------|---|
| Omisso | 0 |
|--------|---|

|        |       | Race       |             |                    | Porcentagem acumulativa |
|--------|-------|------------|-------------|--------------------|-------------------------|
|        |       | Frequência | Porcentagem | Porcentagem válida |                         |
| Válido | White | 778        | 59,3        | 59,3               | 59,3                    |
|        | Pardo | 433        | 33,0        | 33,0               | 92,2                    |
|        | Black | 81         | 6,2         | 6,2                | 98,4                    |
|        | Other | 21         | 1,6         | 1,6                | 100,0                   |
|        | Total | 1313       | 100,0       | 100,0              |                         |

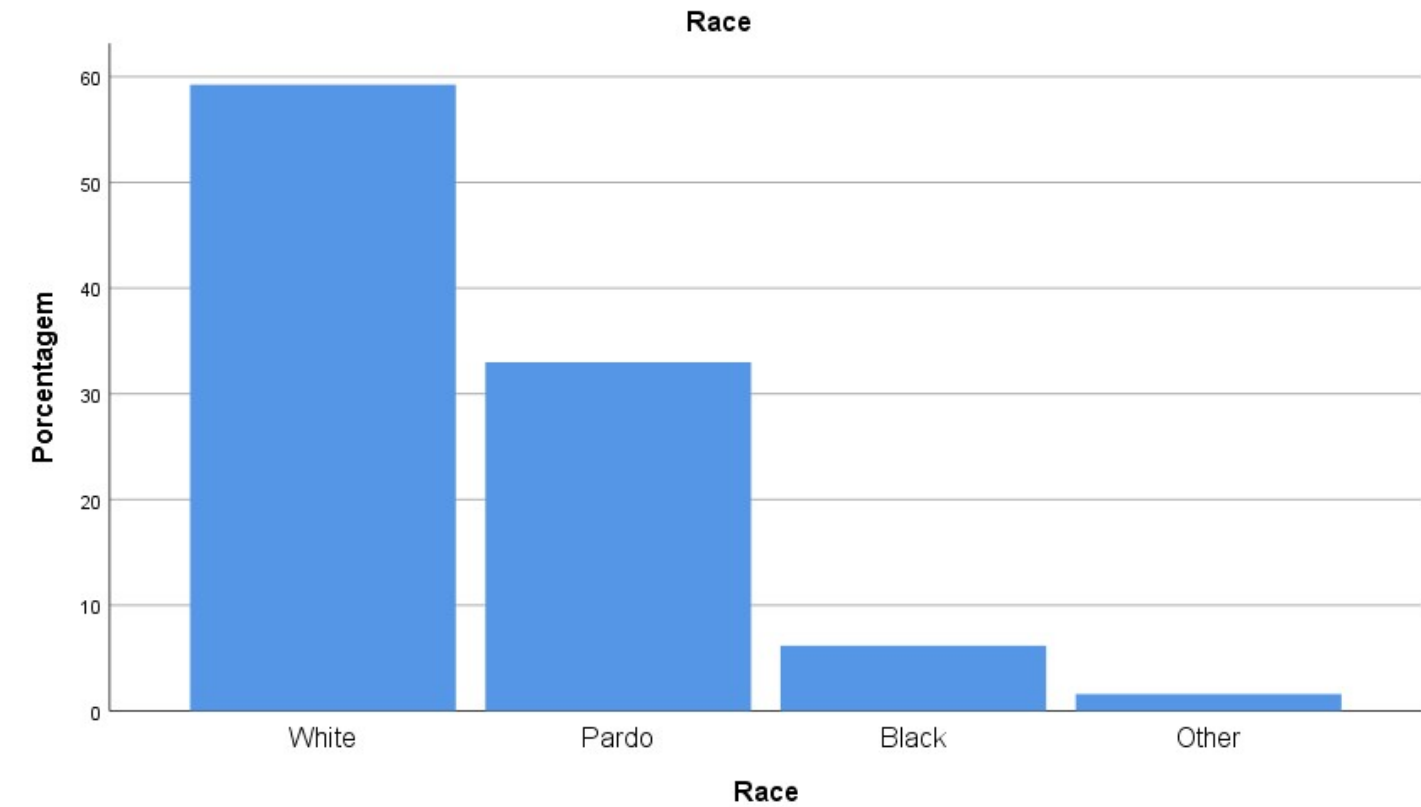

Any comorbidity (regardless COVID risk)

| Estatísticas                            |        |      |
|-----------------------------------------|--------|------|
| Any comorbidity (regardless COVID risk) |        |      |
| N                                       | Válido | 1305 |
|                                         | Omisso | 8    |

Any comorbidity (regardless COVID risk)

|        |       | Frequência | Porcentagem | Porcentagem válida | Porcentagem acumulativa |
|--------|-------|------------|-------------|--------------------|-------------------------|
| Válido | No    | 1071       | 81,6        | 82,1               | 82,1                    |
|        | Yes   | 234        | 17,8        | 17,9               | 100,0                   |
|        | Total | 1305       | 99,4        | 100,0              |                         |
| Omisso | 999   | 8          | ,6          |                    |                         |
| Total  |       | 1313       | 100,0       |                    |                         |

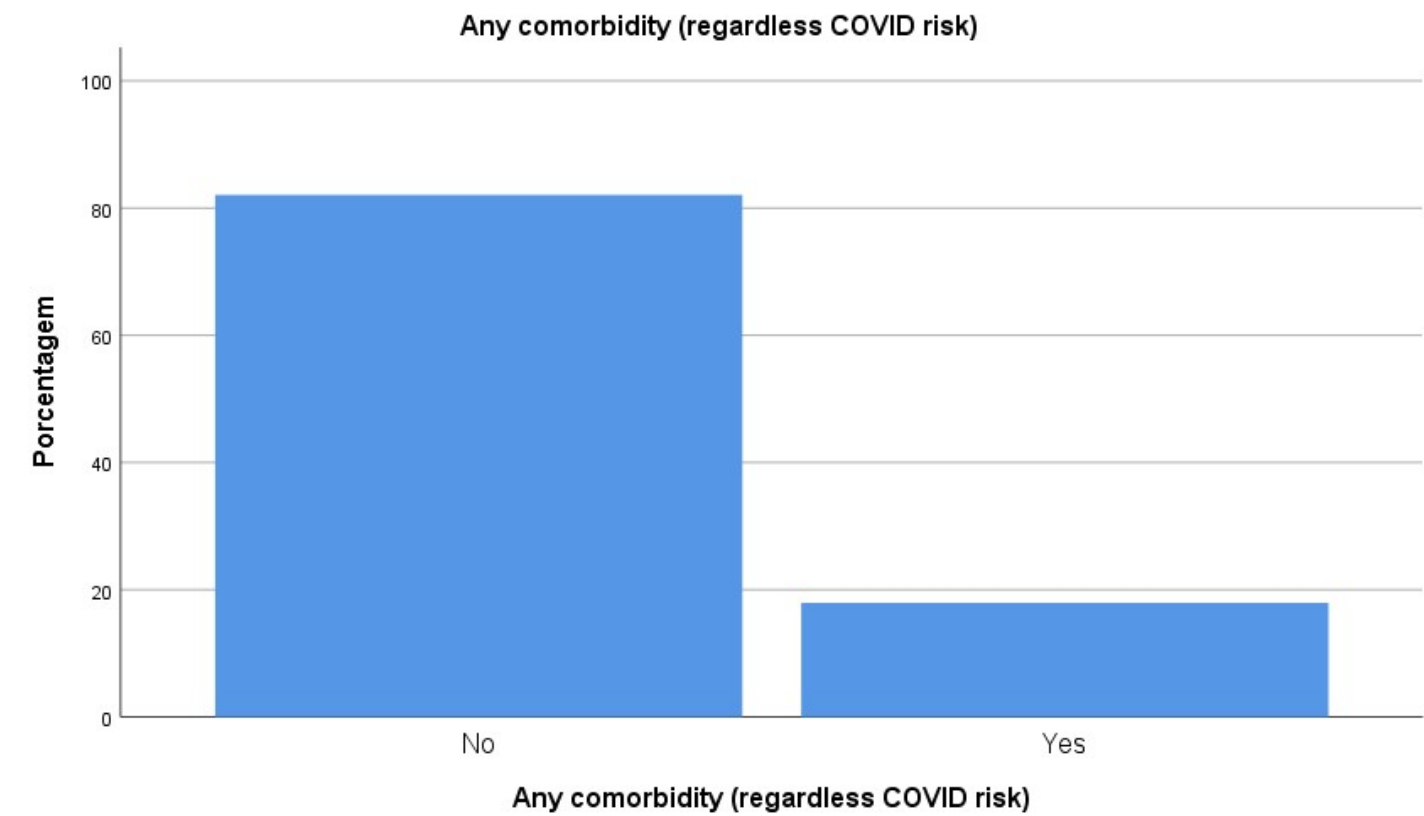

Risk factor(s) for severe COVID19

Estatísticas

Risk factor(s) for severe COVID19

|   |        |      |
|---|--------|------|
| N | Válido | 1305 |
|   | Omisso | 8    |

Risk factor(s) for severe COVID19

|        |     | Frequência | Porcentagem | Porcentagem válida | Porcentagem acumulativa |
|--------|-----|------------|-------------|--------------------|-------------------------|
| Válido | No  | 1087       | 82,8        | 83,3               | 83,3                    |
|        | Yes | 218        | 16,6        | 16,7               | 100,0                   |

|        |       |      |       |       |  |
|--------|-------|------|-------|-------|--|
|        | Total | 1305 | 99,4  | 100,0 |  |
| Omisso | 999   | 8    | ,6    |       |  |
| Total  |       | 1313 | 100,0 |       |  |

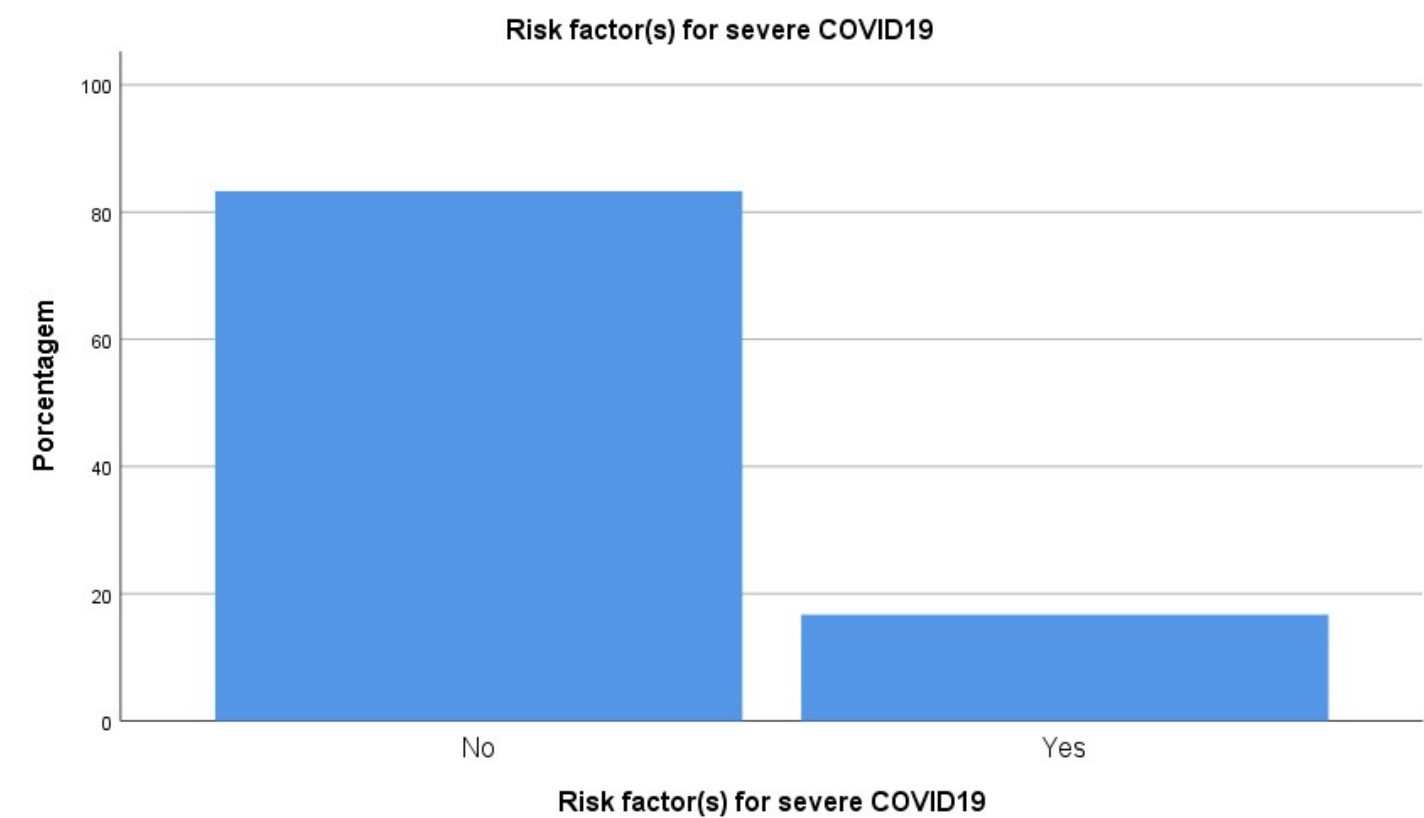

Institution belongs to EBSERH

### Estatísticas

Institution belongs to EBSERH

|   |        |      |
|---|--------|------|
| N | Válido | 1313 |
|   | Omisso | 0    |

| Institution belongs to EBSE <span></span> RH |       |            |             |                    |                         |
|----------------------------------------------|-------|------------|-------------|--------------------|-------------------------|
|                                              |       | Frequência | Porcentagem | Porcentagem válida | Porcentagem acumulativa |
| Válido                                       | No    | 206        | 15,7        | 15,7               | 15,7                    |
|                                              | Yes   | 1107       | 84,3        | 84,3               | 100,0                   |
|                                              | Total | 1313       | 100,0       | 100,0              |                         |

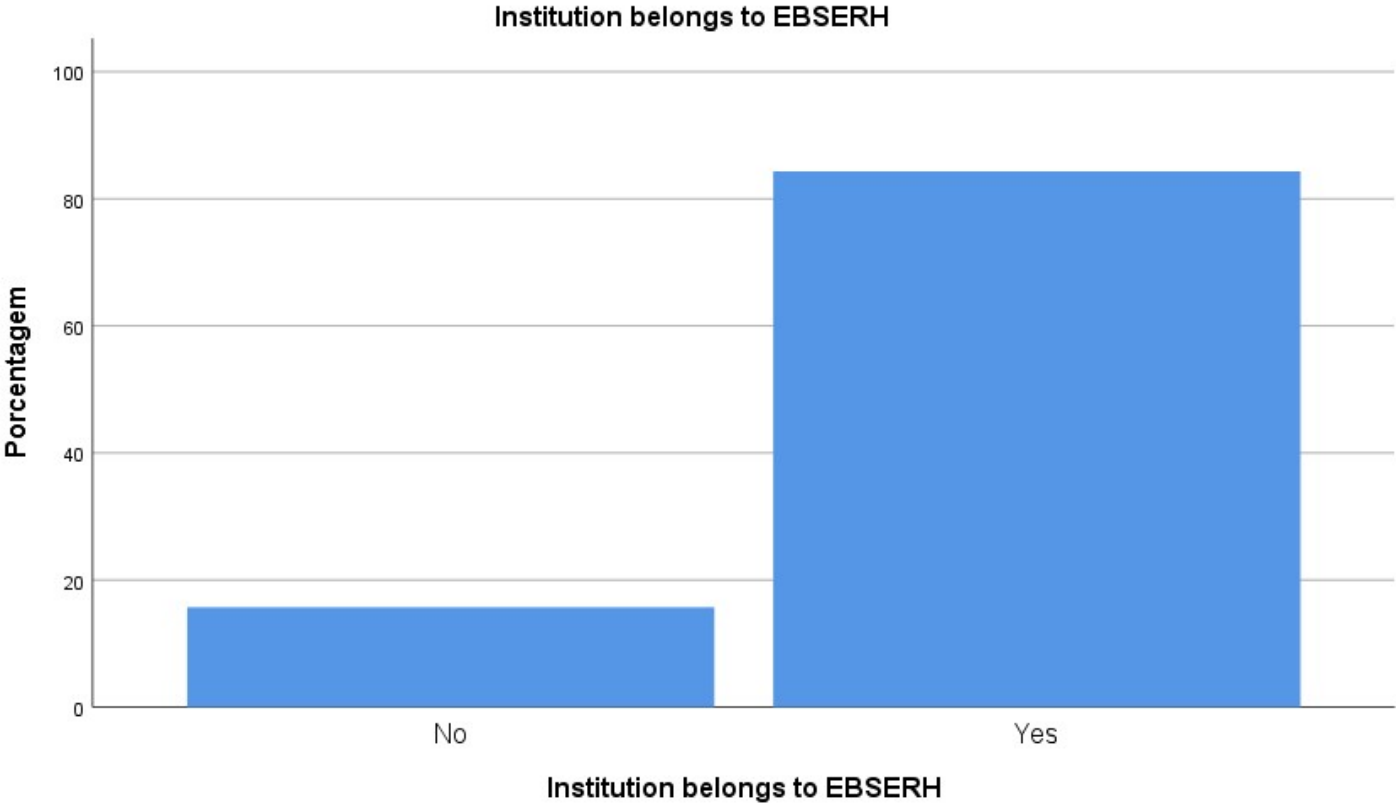

Main financial source of the institution

**Estatísticas**

Main financial source of the institution

|   |        |      |
|---|--------|------|
| N | Válido | 1313 |
|   | Omisso | 0    |

**Main financial source of the institution**

|        |               | Frequência | Porcentagem | Porcentagem válida | Porcentagem acumulativa |
|--------|---------------|------------|-------------|--------------------|-------------------------|
| Válido | Public        | 1270       | 96,7        | 96,7               | 96,7                    |
|        | Philanthropic | 32         | 2,4         | 2,4                | 99,2                    |
|        | Private       | 11         | ,8          | ,8                 | 100,0                   |
|        | Total         | 1313       | 100,0       | 100,0              |                         |

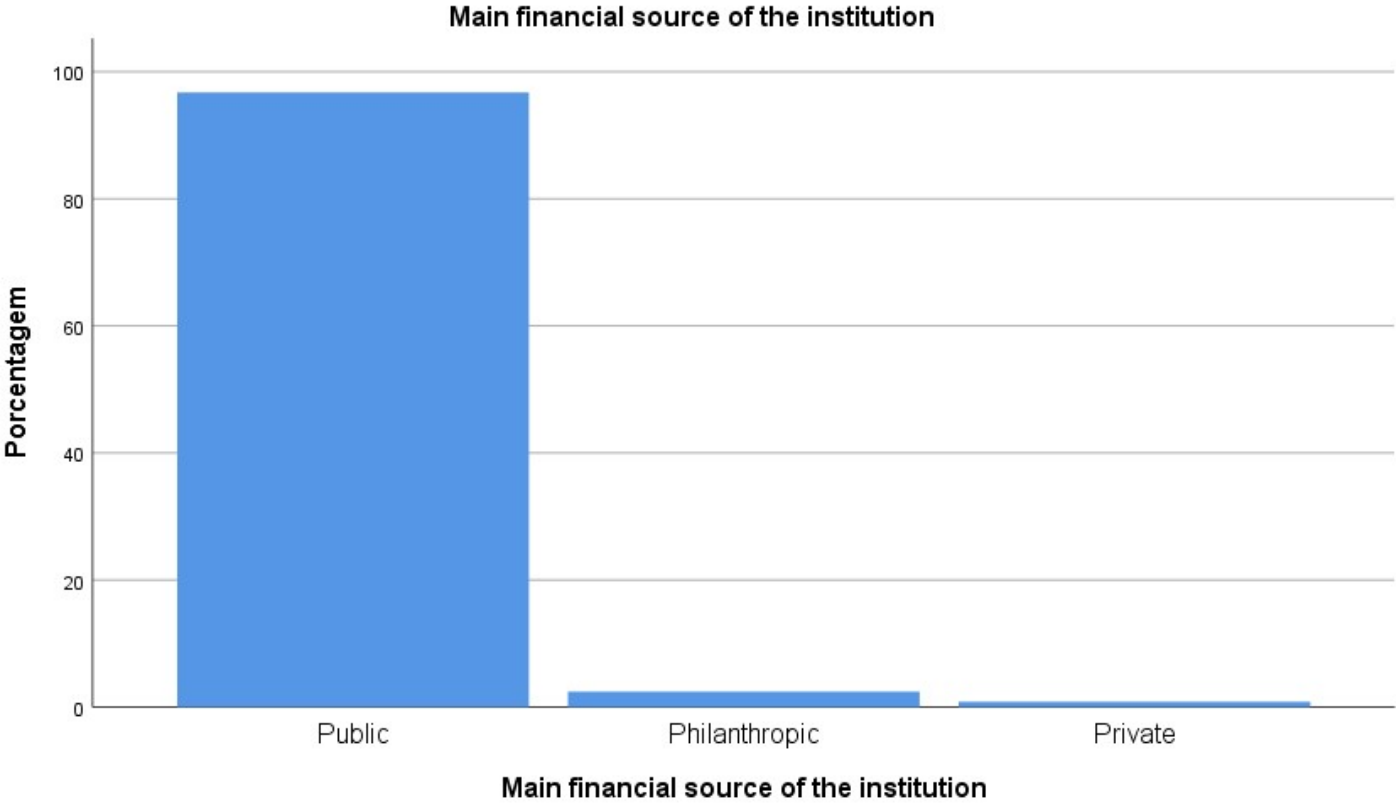

The institution is a university hospital

**Estatísticas**

The institution is a university hospital

|   |        |      |
|---|--------|------|
| N | Válido | 1313 |
|   | Omisso | 0    |

**The institution is a university hospital**

|        |       | Frequência | Porcentagem | Porcentagem válida | Porcentagem acumulativa |
|--------|-------|------------|-------------|--------------------|-------------------------|
| Válido | No    | 136        | 10,4        | 10,4               | 10,4                    |
|        | Yes   | 1177       | 89,6        | 89,6               | 100,0                   |
|        | Total | 1313       | 100,0       | 100,0              |                         |

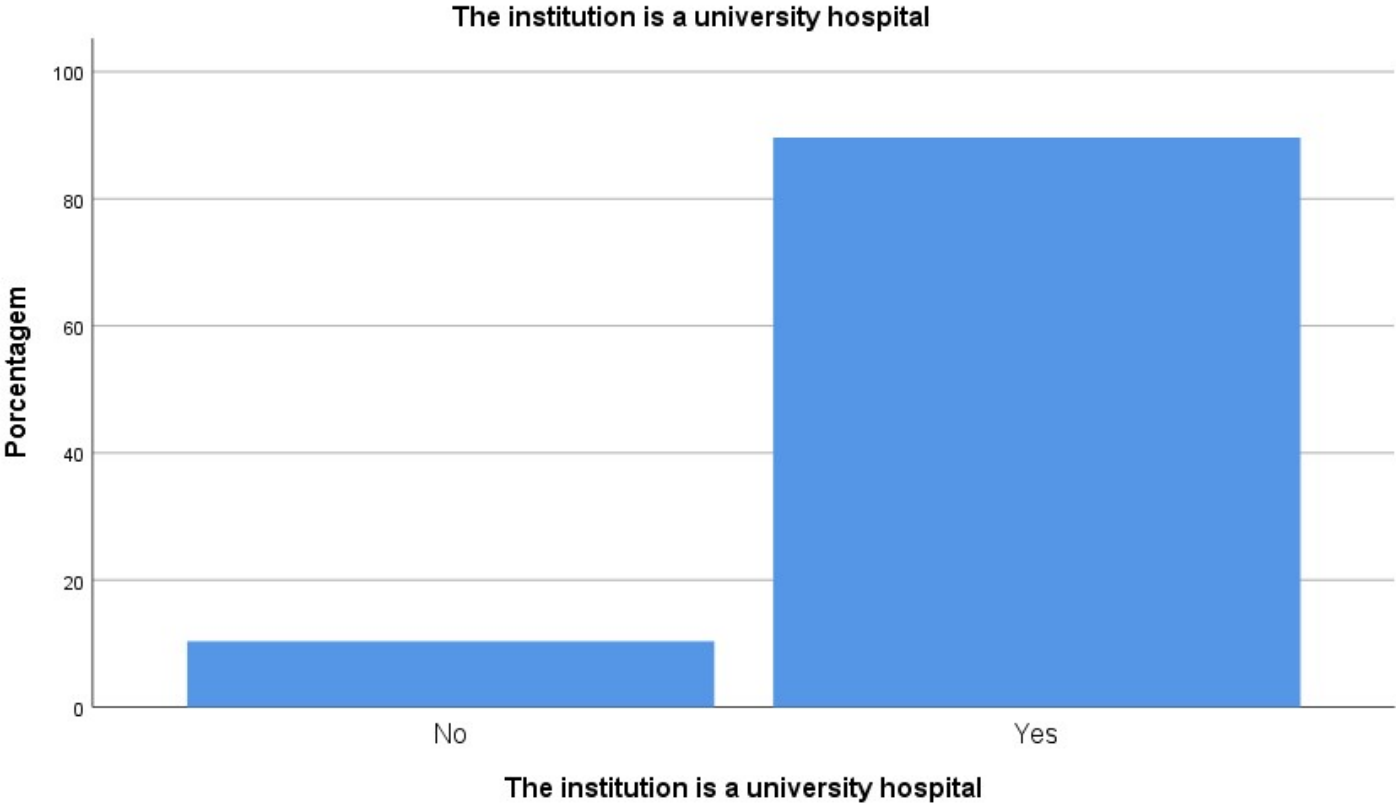

Type of residency program

| Estatísticas              |        |      |
|---------------------------|--------|------|
| Type of residency program |        |      |
| N                         | Válido | 1313 |
|                           | Omisso | 0    |

| Type of residency program |                         |            |             |                    |                         |
|---------------------------|-------------------------|------------|-------------|--------------------|-------------------------|
|                           |                         | Frequência | Porcentagem | Porcentagem válida | Porcentagem acumulativa |
| Válido                    | Non-Medical (Other HCP) | 639        | 48,7        | 48,7               | 48,7                    |
|                           | Medical                 | 674        | 51,3        | 51,3               | 100,0                   |
|                           | Total                   | 1313       | 100,0       | 100,0              |                         |

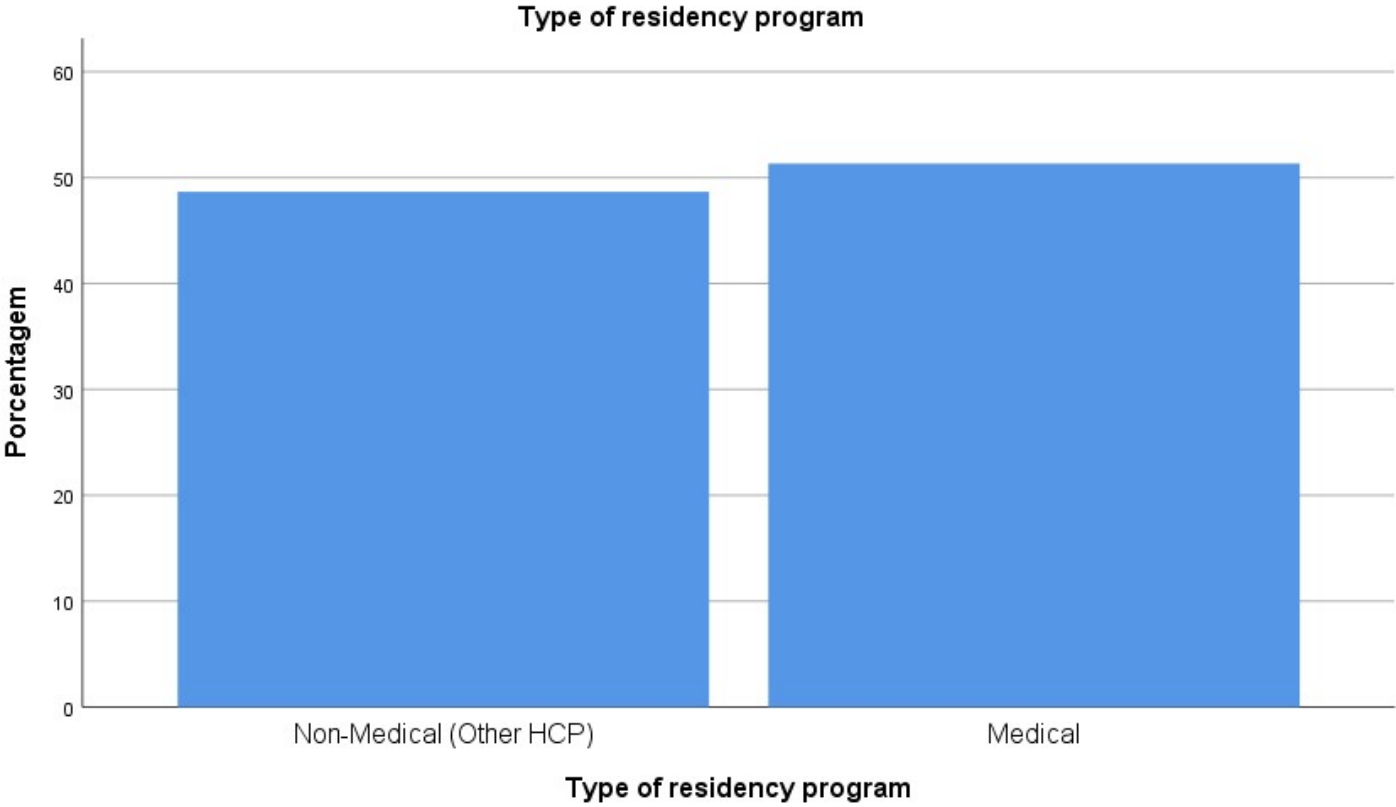

Professional category of the participant

**Estatísticas**

|                                          |        |      |
|------------------------------------------|--------|------|
| Professional category of the participant |        |      |
| N                                        | Válido | 1272 |
|                                          | Omisso | 41   |

|        |                         | Professional category of the participant |             |                    |                         |
|--------|-------------------------|------------------------------------------|-------------|--------------------|-------------------------|
|        |                         | Frequência                               | Porcentagem | Porcentagem válida | Porcentagem acumulativa |
| Válido | Physicians              | 674                                      | 51,3        | 53,0               | 53,0                    |
|        | Nurses                  | 115                                      | 8,8         | 9,0                | 62,0                    |
|        | Pharmacists             | 91                                       | 6,9         | 7,2                | 69,2                    |
|        | Nutritionists           | 82                                       | 6,2         | 6,4                | 75,6                    |
|        | Psychologists           | 82                                       | 6,2         | 6,4                | 82,1                    |
|        | Physiotherapists        | 63                                       | 4,8         | 5,0                | 87,0                    |
|        | Social Assistants       | 51                                       | 3,9         | 4,0                | 91,0                    |
|        | Dentists                | 37                                       | 2,8         | 2,9                | 93,9                    |
|        | Occupational therapists | 22                                       | 1,7         | 1,7                | 95,7                    |
|        | Others                  | 55                                       | 4,2         | 4,3                | 100,0                   |
|        | Total                   | 1272                                     | 96,9        | 100,0              |                         |

|        |     |      |       |  |  |
|--------|-----|------|-------|--|--|
| Omisso | 999 | 41   | 3,1   |  |  |
| Total  |     | 1313 | 100,0 |  |  |

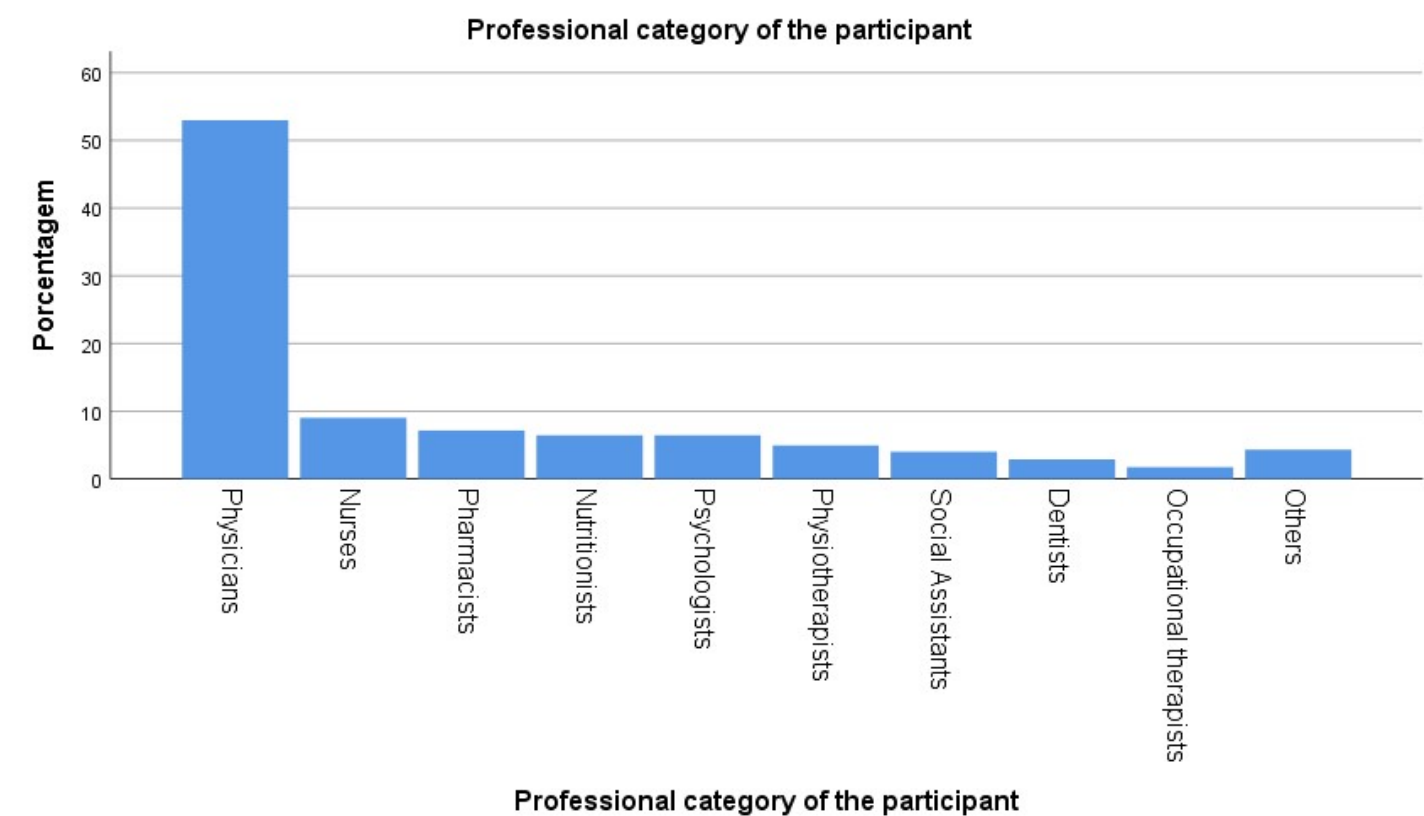

Medical specialty program - Broad Area (physicians only)

### Estatísticas

Medical specialty program - Broad Area  
(physicians only)

|   |        |     |
|---|--------|-----|
| N | Válido | 674 |
|   | Omisso | 639 |

### Medical specialty program - Broad Area (physicians only)

|        |                                                      | Frequência | Porcentagem | Porcentagem válida | Porcentagem acumulativa |
|--------|------------------------------------------------------|------------|-------------|--------------------|-------------------------|
| Válido | Intensive, Emergency and General Clinical Care       | 138        | 10,5        | 20,5               | 20,5                    |
|        | Clinical Subspecialties                              | 186        | 14,2        | 27,6               | 48,1                    |
|        | Surgical Specialties (general surgery included)      | 114        | 8,7         | 16,9               | 65,0                    |
|        | Gynaecology and Obstetrics (subspecialties included) | 66         | 5,0         | 9,8                | 74,8                    |

|        |                                      |      |       |       |       |
|--------|--------------------------------------|------|-------|-------|-------|
|        | Pediatrics (subspecialties included) | 124  | 9,4   | 18,4  | 93,2  |
|        | Diagnostic Medicine Specialties      | 46   | 3,5   | 6,8   | 100,0 |
|        | Total                                | 674  | 51,3  | 100,0 |       |
| Omisso | 999                                  | 639  | 48,7  |       |       |
| Total  |                                      | 1313 | 100,0 |       |       |

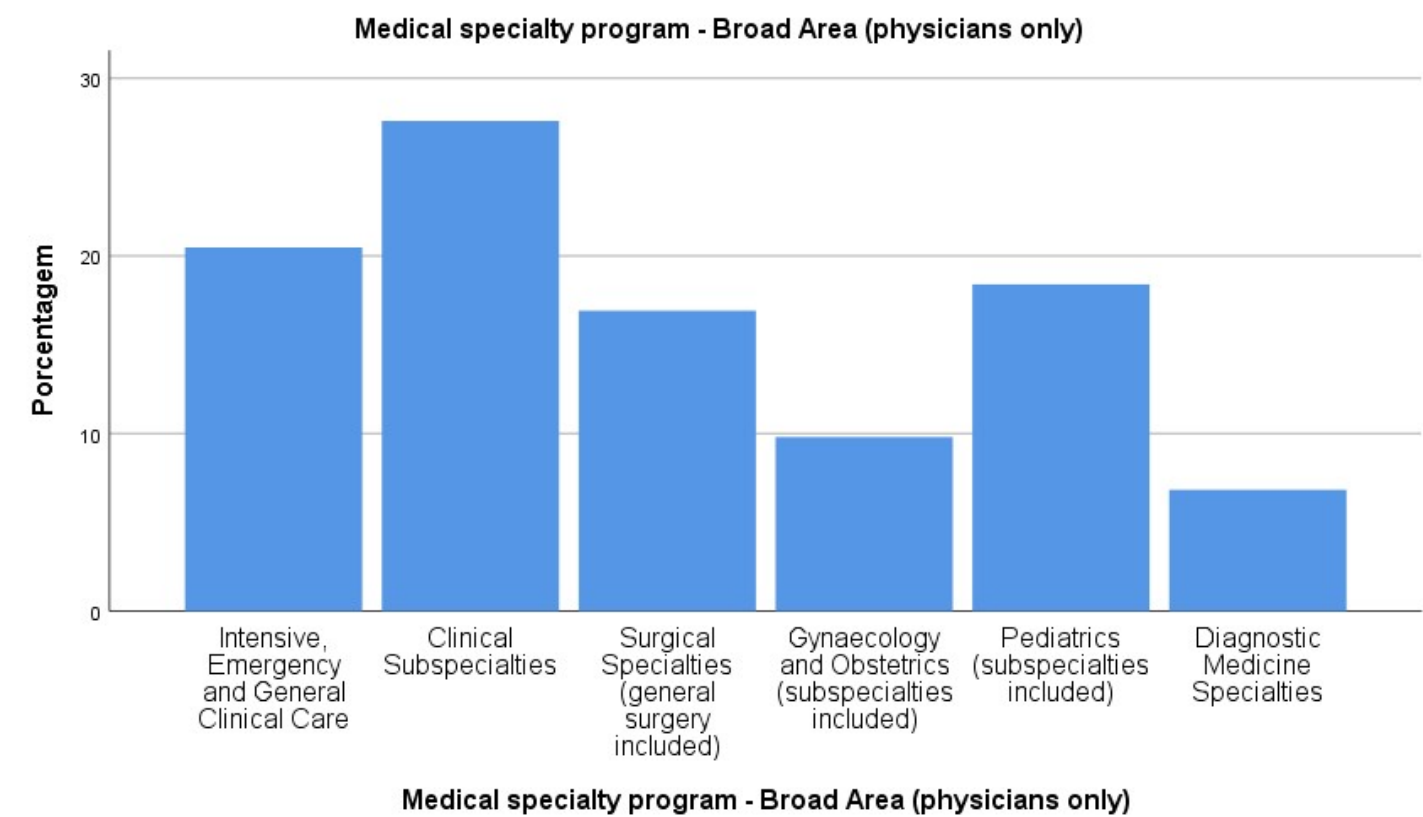

```

FREQUENCIES VARIABLES=Institution FedState ResidProgName MedSpec
/FORMAT=DFREQ
/ORDER=VARIABLE.
  
```

Frequências

| Observações  |                         |                                                              |
|--------------|-------------------------|--------------------------------------------------------------|
| Saída criada |                         | 20-SEP-2020 11:17:27                                         |
| Comentários  |                         |                                                              |
| Entrada      | Dados                   | C:\Users\User\Documents\Pesquisa\Fellow\FellowGenData_V1.sav |
|              | Conjunto de dados ativo | ConjuntodeDados1                                             |
|              | Filtro                  | <none>                                                       |
|              | Ponderação              | <none>                                                       |
|              | Arquivo Dividido        | <none>                                                       |

|                             |                                             |                                                                                                             |
|-----------------------------|---------------------------------------------|-------------------------------------------------------------------------------------------------------------|
|                             | N de linhas em arquivo de dados de trabalho | 1313                                                                                                        |
| Tratamento de valor omissos | Definição de omissos                        | Os valores omissos definidos pelo usuário são tratados como omissos.                                        |
|                             | Casos utilizados                            | As estatísticas estão baseadas em todos os casos com dados válidos.                                         |
| Sintaxe                     |                                             | FREQUENCIES<br>VARIABLES=Institution FedState<br>ResidProgName MedSpec<br>/FORMAT=DFREQ<br>/ORDER=VARIABLE. |
| Recursos                    | Tempo do processador                        | 00:00:00,02                                                                                                 |
|                             | Tempo decorrido                             | 00:00:00,04                                                                                                 |

Institution of residency program

Estatísticas

Institution of residency program

|   |        |      |
|---|--------|------|
| N | Válido | 1312 |
|   | Omisso | 1    |

Institution of residency program

|        |                                                                                    | Frequência | Porcentagem | Porcentagem válida | Porcentagem acumulativa |
|--------|------------------------------------------------------------------------------------|------------|-------------|--------------------|-------------------------|
| Válido | Hospital Universitário da Universidade de Brasília                                 | 116        | 8,8         | 8,8                | 8,8                     |
|        | Complexo do Hospital de Clínicas da Universidade Federal do Paraná                 | 113        | 8,6         | 8,6                | 17,5                    |
|        | Hospital Universitário da Universidade Federal de Sergipe                          | 59         | 4,5         | 4,5                | 22,0                    |
|        | Hospital Universitário Onofre Lopes da Universidade Federal do Rio Grande do Norte | 58         | 4,4         | 4,4                | 26,4                    |
|        | Hospital Universitário da Universidade Federal do Piauí                            | 56         | 4,3         | 4,3                | 30,6                    |
|        | Hospital Universitário da Universidade Federal de Juiz de Fora                     | 51         | 3,9         | 3,9                | 34,5                    |
|        | Hospital das Clínicas da Universidade Federal de Goiás                             | 48         | 3,7         | 3,7                | 38,2                    |

|                                                                                             |    |     |     |      |
|---------------------------------------------------------------------------------------------|----|-----|-----|------|
| Complexo Hospitalar da Universidade Federal do Ceará                                        | 41 | 3,1 | 3,1 | 41,3 |
| Hospital de Clínicas da Universidade Federal de Uberlândia                                  | 39 | 3,0 | 3,0 | 44,3 |
| Hospital Universitário Antonio Pedro da Universidade Federal Fluminense                     | 39 | 3,0 | 3,0 | 47,3 |
| Hospital Universitário da Universidade Federal de Santa Catarina                            | 38 | 2,9 | 2,9 | 50,2 |
| Hospital Universitário da Universidade Federal do Maranhão                                  | 36 | 2,7 | 2,7 | 52,9 |
| Hospital Universitário de Santa Maria da Universidade Federal de Santa Maria                | 33 | 2,5 | 2,5 | 55,4 |
| Hospital das Clínicas da Universidade Federal de Minas Gerais                               | 32 | 2,4 | 2,4 | 57,9 |
| Hospital das Clínicas da Universidade Federal de Pernambuco                                 | 27 | 2,1 | 2,1 | 59,9 |
| Hospital Universitário Lauro Wanderley da Universidade Federal da Paraíba                   | 27 | 2,1 | 2,1 | 62,0 |
| Hospital Universitário Professor Edgard Santos da Universidade Federal da Bahia             | 27 | 2,1 | 2,1 | 64,0 |
| Hospital Universitário Júlio Müller da Universidade Federal do Mato Grosso                  | 26 | 2,0 | 2,0 | 66,0 |
| Hospital Universitário Getúlio Vargas da Universidade Federal do Amazonas                   | 23 | 1,8 | 1,8 | 67,8 |
| Hospital Universitário Cassiano Antonio de Moraes da Universidade Federal do Espírito Santo | 21 | 1,6 | 1,6 | 69,4 |
| Hospital Universitário da Universidade Federal da Grande Dourados                           | 21 | 1,6 | 1,6 | 71,0 |
| Complexo Hospitalar Universitário da Universidade Federal do Pará                           | 20 | 1,5 | 1,5 | 72,5 |
| Hospital Escola da Universidade Federal de Pelotas                                          | 20 | 1,5 | 1,5 | 74,0 |

|                                                                                                      |    |     |     |      |
|------------------------------------------------------------------------------------------------------|----|-----|-----|------|
| Hospital de Clínicas da Universidade Federal do Triângulo Mineiro                                    | 19 | 1,4 | 1,4 | 75,5 |
| Hospital Universitário Ana Bezerra da Universidade Federal do Rio Grande do Norte                    | 19 | 1,4 | 1,4 | 76,9 |
| Hospital Universitário Maria Aparecida Pedrossian da Universidade Federal de Mato Grosso do Sul      | 16 | 1,2 | 1,2 | 78,1 |
| Instituto Hospital de Base de Brasília                                                               | 15 | 1,1 | 1,1 | 79,3 |
| Hospital Universitário Dr. Miguel Riet Corrêa Júnior da Universidade Federal do Rio Grande           | 14 | 1,1 | 1,1 | 80,3 |
| Hospital Universitário Professor Alberto Antunes da Universidade Federal de Alagoas                  | 14 | 1,1 | 1,1 | 81,4 |
| Complexo Hospitalar da Universidade Federal do Ceará (Maternidade Escola Assis Chateaubriand)        | 12 | ,9  | ,9  | 82,3 |
| Hospital Universitário de Lagarto                                                                    | 11 | ,8  | ,8  | 83,2 |
| UBS/ Atenção Primária SES-DF                                                                         | 10 | ,8  | ,8  | 83,9 |
| Hospital da Região Leste                                                                             | 9  | ,7  | ,7  | 84,6 |
| Hospital de Ensino Dr. Washington Antônio de Barros da Universidade Federal do Vale do São Francisco | 9  | ,7  | ,7  | 85,3 |
| Hospital Regional de Sobradinho                                                                      | 8  | ,6  | ,6  | 85,9 |
| Hospital Regional de Taguatinga                                                                      | 7  | ,5  | ,5  | 86,4 |
| Hospital Regional do Gama                                                                            | 7  | ,5  | ,5  | 87,0 |
| Hospital São Lucas da PUCRS                                                                          | 6  | ,5  | ,5  | 87,4 |
| Maternidade Escola Januário Cicco da Universidade Federal do Rio Grande do Norte                     | 6  | ,5  | ,5  | 87,9 |
| Hospital Regional de Ceilândia                                                                       | 5  | ,4  | ,4  | 88,3 |
| Hospital Universitário Alcides Carneiro da Universidade Federal de Campina Grande                    | 5  | ,4  | ,4  | 88,6 |
| Hospital Universitário de Londrina                                                                   | 5  | ,4  | ,4  | 89,0 |
| Hospital de Clínicas de Porto Alegre                                                                 | 4  | ,3  | ,3  | 89,3 |
| Hospital de Doenças Tropicais da Universidade Federal do Tocantins                                   | 4  | ,3  | ,3  | 89,6 |

|                                                                                             |   |    |    |      |
|---------------------------------------------------------------------------------------------|---|----|----|------|
| Hospital Infantil Lucidio Portela                                                           | 4 | ,3 | ,3 | 89,9 |
| Hospital Regional da Asa Norte                                                              | 4 | ,3 | ,3 | 90,2 |
| Hospital Regional de Santa Maria                                                            | 4 | ,3 | ,3 | 90,5 |
| Hospital São Sebastião                                                                      | 4 | ,3 | ,3 | 90,9 |
| Secretaria de Saúde do Distrito Federal                                                     | 4 | ,3 | ,3 | 91,2 |
| UBS/ Atenção Primária SES-RS                                                                | 4 | ,3 | ,3 | 91,5 |
| Hospital de Clínicas de Itajubá                                                             | 3 | ,2 | ,2 | 91,7 |
| Hospital Universitário Gaffrée e Guinle da Universidade Federal do Estado do Rio de Janeiro | 3 | ,2 | ,2 | 91,9 |
| Hospital Universitário Pedro Ernesto                                                        | 3 | ,2 | ,2 | 92,1 |
| Irmandade Nossa Senhora das Mercês Santa Casa de Montes Claros                              | 3 | ,2 | ,2 | 92,4 |
| UBS/ Atenção Básica - SES/SC                                                                | 3 | ,2 | ,2 | 92,6 |
| UBS/ Atenção Primária - SES/SE                                                              | 3 | ,2 | ,2 | 92,8 |
| Centro Estadual de Reabilitação e Readaptação Dr Henrique Santillo                          | 2 | ,2 | ,2 | 93,0 |
| Hospital Colônia Dr. João Machado                                                           | 2 | ,2 | ,2 | 93,1 |
| Hospital da Região Leste (HRPa / SES-DF)                                                    | 2 | ,2 | ,2 | 93,3 |
| Hospital de Apoio de Brasília                                                               | 2 | ,2 | ,2 | 93,4 |
| Hospital de Base Rio Preto                                                                  | 2 | ,2 | ,2 | 93,6 |
| Hospital João XXIII                                                                         | 2 | ,2 | ,2 | 93,8 |
| Hospital Maternidade Sofia Feldman                                                          | 2 | ,2 | ,2 | 93,9 |
| Hospital Materno Infantil de Brasília                                                       | 2 | ,2 | ,2 | 94,1 |
| Hospital Veterinário UFU                                                                    | 2 | ,2 | ,2 | 94,2 |
| Instituto Ortopédico de Goiânia                                                             | 2 | ,2 | ,2 | 94,4 |
| Maternidade Odete Valadares                                                                 | 2 | ,2 | ,2 | 94,5 |
| Santa Casa Montes Claros                                                                    | 2 | ,2 | ,2 | 94,7 |
| UBS/ Atenção Primária - SES/SP                                                              | 2 | ,2 | ,2 | 94,8 |
| Associacao Hospitalar Santa Rosalia                                                         | 1 | ,1 | ,1 | 94,9 |
| Beneficência Portuguesa de São Paulo                                                        | 1 | ,1 | ,1 | 95,0 |
| CAPS SES-SE                                                                                 | 1 | ,1 | ,1 | 95,0 |
| CAPS Taguatinga SES-DF                                                                      | 1 | ,1 | ,1 | 95,1 |
| Centro Avançado de Oncologia                                                                | 1 | ,1 | ,1 | 95,2 |
| Centro de Referência Municipal para COVID - Santa Maria                                     | 1 | ,1 | ,1 | 95,3 |
| Clínica Odontológica Universitária                                                          | 1 | ,1 | ,1 | 95,4 |

|                                                                             |   |    |    |      |
|-----------------------------------------------------------------------------|---|----|----|------|
| Complexo de Saúde São João de Deus                                          | 1 | ,1 | ,1 | 95,4 |
| Departamento de Patologia Animal da UFPel                                   | 1 | ,1 | ,1 | 95,5 |
| Escola Superior de Ciências da Saúde                                        | 1 | ,1 | ,1 | 95,6 |
| Escola Superior de Ciências da Saúde SES-DF                                 | 1 | ,1 | ,1 | 95,7 |
| Hospital 9 de Julho                                                         | 1 | ,1 | ,1 | 95,7 |
| Hospital Beneficente UNIMAR                                                 | 1 | ,1 | ,1 | 95,8 |
| Hospital Casa de Saúde                                                      | 1 | ,1 | ,1 | 95,9 |
| Hospital Cesar Leite                                                        | 1 | ,1 | ,1 | 96,0 |
| Hospital da Criança de Brasília                                             | 1 | ,1 | ,1 | 96,0 |
| Hospital da Criança Santo Antônio                                           | 1 | ,1 | ,1 | 96,1 |
| Hospital da PUC-Campinas                                                    | 1 | ,1 | ,1 | 96,2 |
| Hospital da Restauração Gov. Paulo Guerra                                   | 1 | ,1 | ,1 | 96,3 |
| Hospital Daher Lago Sul                                                     | 1 | ,1 | ,1 | 96,3 |
| Hospital das Clínicas da Faculdade de Medicina da Universidade de São Paulo | 1 | ,1 | ,1 | 96,4 |
| Hospital das Forças Armadas                                                 | 1 | ,1 | ,1 | 96,5 |
| Hospital de Base de São José do Rio Preto                                   | 1 | ,1 | ,1 | 96,6 |
| Hospital de Base Dr. Ary Pinheiro                                           | 1 | ,1 | ,1 | 96,6 |
| Hospital de Clínicas de Uberlândia                                          | 1 | ,1 | ,1 | 96,7 |
| Hospital de Clínicas Veterinárias                                           | 1 | ,1 | ,1 | 96,8 |
| Hospital de Clínicas Veterinárias - UFPel                                   | 1 | ,1 | ,1 | 96,9 |
| Hospital de Urgência de Sergipe                                             | 1 | ,1 | ,1 | 97,0 |
| Hospital do Trabalhador                                                     | 1 | ,1 | ,1 | 97,0 |
| Hospital e Maternidade Santa Isabel                                         | 1 | ,1 | ,1 | 97,1 |
| Hospital e Pronto Socorro 28 de Agosto                                      | 1 | ,1 | ,1 | 97,2 |
| Hospital Estadual da Criança                                                | 1 | ,1 | ,1 | 97,3 |
| Hospital Estadual Materno-Infantil Dr. Jurandir do Nascimento               | 1 | ,1 | ,1 | 97,3 |
| Hospital Evangélico Goiano                                                  | 1 | ,1 | ,1 | 97,4 |
| Hospital Geral de Itapecerica da Serra                                      | 1 | ,1 | ,1 | 97,5 |
| Hospital Geral do Estado                                                    | 1 | ,1 | ,1 | 97,6 |
| Hospital Getúlio Vargas                                                     | 1 | ,1 | ,1 | 97,6 |
| Hospital HOME                                                               | 1 | ,1 | ,1 | 97,7 |
| Hospital Infantil Varela Santiago                                           | 1 | ,1 | ,1 | 97,8 |
| Hospital Júlia Kubitschek                                                   | 1 | ,1 | ,1 | 97,9 |

|        |                                                                               |      |       |       |       |
|--------|-------------------------------------------------------------------------------|------|-------|-------|-------|
|        | Hospital Municipal Getúlio Vargas                                             | 1    | ,1    | ,1    | 97,9  |
|        | Hospital Otorrino Center                                                      | 1    | ,1    | ,1    | 98,0  |
|        | Hospital Psiquiátrico São Pedro                                               | 1    | ,1    | ,1    | 98,1  |
|        | Hospital Regional Antônio Dias                                                | 1    | ,1    | ,1    | 98,2  |
|        | Hospital regional da asa norte                                                | 1    | ,1    | ,1    | 98,2  |
|        | Hospital Regional da Asa Norte<br>SES-DF                                      | 1    | ,1    | ,1    | 98,3  |
|        | Hospital Regional da Samambaia                                                | 1    | ,1    | ,1    | 98,4  |
|        | Hospital Regional de Cacoal                                                   | 1    | ,1    | ,1    | 98,5  |
|        | Hospital Santa Isabel Ubá                                                     | 1    | ,1    | ,1    | 98,6  |
|        | Hospital Santa Rosália                                                        | 1    | ,1    | ,1    | 98,6  |
|        | Hospital São Lucas - Cascavel PR                                              | 1    | ,1    | ,1    | 98,7  |
|        | Hospital São Vicente de Paulo                                                 | 1    | ,1    | ,1    | 98,8  |
|        | Hospital Universitário Cajuru                                                 | 1    | ,1    | ,1    | 98,9  |
|        | Hospital Universitário Clemente de<br>Faria                                   | 1    | ,1    | ,1    | 98,9  |
|        | Hospital Universitario da<br>Universidade Federal de São<br>Carlos            | 1    | ,1    | ,1    | 99,0  |
|        | Hospital Universitário da<br>Universidade Federal do Vale do<br>São Francisco | 1    | ,1    | ,1    | 99,1  |
|        | Hospital Universitário de Santa<br>Maria                                      | 1    | ,1    | ,1    | 99,2  |
|        | Hospital Universitário Regional<br>Norte do Paraná                            | 1    | ,1    | ,1    | 99,2  |
|        | Hospital Veterinário<br>Universitário de Santa Maria                          | 1    | ,1    | ,1    | 99,3  |
|        | Hospital Veterinário<br>Universitário de Santa Maria -<br>UFSM                | 1    | ,1    | ,1    | 99,4  |
|        | Instituto Benjamin Constant                                                   | 1    | ,1    | ,1    | 99,5  |
|        | Instituto de Assistência Médica ao<br>Servidor Público Estadual               | 1    | ,1    | ,1    | 99,5  |
|        | Laboratório Regional de<br>Diagnóstico da UFPel                               | 1    | ,1    | ,1    | 99,6  |
|        | Maternidade Municipal Mãe<br>Esperança                                        | 1    | ,1    | ,1    | 99,7  |
|        | Obras Sociais Irmã Dulce                                                      | 1    | ,1    | ,1    | 99,8  |
|        | Posto de Saúde Lineu Jucá                                                     | 1    | ,1    | ,1    | 99,8  |
|        | Santa Casa de Misericórdia de<br>Cerquilho                                    | 1    | ,1    | ,1    | 99,9  |
|        | Santa Casa de Misericórdia de<br>São Sebastião do Paraíso                     | 1    | ,1    | ,1    | 100,0 |
|        | Total                                                                         | 1312 | 99,9  | 100,0 |       |
| Omisso | 999                                                                           | 1    | ,1    |       |       |
| Total  |                                                                               | 1313 | 100,0 |       |       |

Federal State

Estatísticas

Federal State

|   |        |      |
|---|--------|------|
| N | Válido | 1313 |
|   | Omisso | 0    |

|        |       | Federal State |             |                    | Porcentagem acumulativa |
|--------|-------|---------------|-------------|--------------------|-------------------------|
|        |       | Frequência    | Porcentagem | Porcentagem válida |                         |
| Válido | DF    | 205           | 15,6        | 15,6               | 15,6                    |
|        | MG    | 172           | 13,1        | 13,1               | 28,7                    |
|        | PR    | 124           | 9,4         | 9,4                | 38,2                    |
|        | RS    | 92            | 7,0         | 7,0                | 45,2                    |
|        | RN    | 87            | 6,6         | 6,6                | 51,8                    |
|        | SE    | 76            | 5,8         | 5,8                | 57,6                    |
|        | PI    | 61            | 4,6         | 4,6                | 62,2                    |
|        | GO    | 55            | 4,2         | 4,2                | 66,4                    |
|        | CE    | 54            | 4,1         | 4,1                | 70,5                    |
|        | RJ    | 45            | 3,4         | 3,4                | 74,0                    |
|        | SC    | 41            | 3,1         | 3,1                | 77,1                    |
|        | PE    | 38            | 2,9         | 2,9                | 80,0                    |
|        | MS    | 37            | 2,8         | 2,8                | 82,8                    |
|        | MA    | 36            | 2,7         | 2,7                | 85,5                    |
|        | PB    | 32            | 2,4         | 2,4                | 88,0                    |
|        | BA    | 30            | 2,3         | 2,3                | 90,3                    |
|        | MT    | 26            | 2,0         | 2,0                | 92,2                    |
|        | AM    | 24            | 1,8         | 1,8                | 94,1                    |
|        | ES    | 21            | 1,6         | 1,6                | 95,7                    |
|        | PA    | 20            | 1,5         | 1,5                | 97,2                    |
|        | AL    | 15            | 1,1         | 1,1                | 98,3                    |
|        | SP    | 14            | 1,1         | 1,1                | 99,4                    |
|        | TO    | 4             | ,3          | ,3                 | 99,7                    |
|        | RO    | 3             | ,2          | ,2                 | 99,9                    |
|        | RR    | 1             | ,1          | ,1                 | 100,0                   |
|        | Total | 1313          | 100,0       | 100,0              |                         |

Residency program denomination

## Estatísticas

Residency program denomination

|   |        |      |
|---|--------|------|
| N | Válido | 1313 |
|   | Omisso | 0    |

## Residency program denomination

|        |                                  | Frequência | Porcentagem | Porcentagem válida | Porcentagem acumulativa |
|--------|----------------------------------|------------|-------------|--------------------|-------------------------|
| Válido | Medicina                         | 671        | 51,1        | 51,1               | 51,1                    |
|        | Enfermagem                       | 114        | 8,7         | 8,7                | 59,8                    |
|        | Farmácia                         | 85         | 6,5         | 6,5                | 66,3                    |
|        | Nutrição                         | 82         | 6,2         | 6,2                | 72,5                    |
|        | Psicologia                       | 82         | 6,2         | 6,2                | 78,8                    |
|        | Fisioterapia                     | 63         | 4,8         | 4,8                | 83,5                    |
|        | Serviço Social                   | 49         | 3,7         | 3,7                | 87,3                    |
|        | Odontologia                      | 34         | 2,6         | 2,6                | 89,9                    |
|        | Terapia ocupacional              | 22         | 1,7         | 1,7                | 91,5                    |
|        | Multiprofissional                | 21         | 1,6         | 1,6                | 93,1                    |
|        | Medicina Veterinária             | 19         | 1,4         | 1,4                | 94,6                    |
|        | Fonoaudiologia                   | 14         | 1,1         | 1,1                | 95,7                    |
|        | Biomedicina                      | 10         | ,8          | ,8                 | 96,4                    |
|        | Educação Física                  | 8          | ,6          | ,6                 | 97,0                    |
|        | Farmácia-bioquímica              | 6          | ,5          | ,5                 | 97,5                    |
|        | Saúde da Família                 | 5          | ,4          | ,4                 | 97,9                    |
|        | Saúde Coletiva                   | 4          | ,3          | ,3                 | 98,2                    |
|        | Cirurgia Bucomaxilofacial        | 3          | ,2          | ,2                 | 98,4                    |
|        | Saúde Materno Infantil           | 2          | ,2          | ,2                 | 98,6                    |
|        | Saúde Mental                     | 2          | ,2          | ,2                 | 98,7                    |
|        | Serviço Social - Saúde da Mulher | 2          | ,2          | ,2                 | 98,9                    |
|        | Análises clínicas                | 1          | ,1          | ,1                 | 98,9                    |
|        | Cardiologia                      | 1          | ,1          | ,1                 | 99,0                    |
|        | Cirurgia                         | 1          | ,1          | ,1                 | 99,1                    |
|        | Cirurgia plástica                | 1          | ,1          | ,1                 | 99,2                    |
|        | Educação física                  | 1          | ,1          | ,1                 | 99,2                    |
|        | Física Médica - Radiodiagnóstico | 1          | ,1          | ,1                 | 99,3                    |
|        | Gestão Hospitalar                | 1          | ,1          | ,1                 | 99,4                    |
|        | Hematologia                      | 1          | ,1          | ,1                 | 99,5                    |
|        | Medicina de Família e Comunidade | 1          | ,1          | ,1                 | 99,5                    |
|        | Medicina do Trabalho             | 1          | ,1          | ,1                 | 99,6                    |
|        | MFC                              | 1          | ,1          | ,1                 | 99,7                    |
|        | Neurointensivismotensivismo      | 1          | ,1          | ,1                 | 99,8                    |

|                            |      |       |       |       |
|----------------------------|------|-------|-------|-------|
| Neurologia                 | 1    | ,1    | ,1    | 99,8  |
| Patologia cirúrgica        | 1    | ,1    | ,1    | 99,9  |
| Saúde do Adulto e do Idoso | 1    | ,1    | ,1    | 100,0 |
| Total                      | 1313 | 100,0 | 100,0 |       |

Medical specialty program (physicians only)

Estatísticas

Medical specialty program (physicians only)

|   |        |     |
|---|--------|-----|
| N | Válido | 674 |
|   | Omisso | 639 |

Medical specialty program (physicians only)

|        |                                     | Frequência | Porcentagem | Porcentagem válida | Porcentagem acumulativa |
|--------|-------------------------------------|------------|-------------|--------------------|-------------------------|
| Válido | Pediatria                           | 100        | 7,6         | 14,8               | 14,8                    |
|        | Clínica Médica                      | 81         | 6,2         | 12,0               | 26,9                    |
|        | Ginecologia e Obstetrícia           | 64         | 4,9         | 9,5                | 36,4                    |
|        | Cirurgia Geral                      | 37         | 2,8         | 5,5                | 41,8                    |
|        | Radiologia e Diagnóstico por Imagem | 32         | 2,4         | 4,7                | 46,6                    |
|        | Psiquiatria                         | 28         | 2,1         | 4,2                | 50,7                    |
|        | Dermatologia                        | 27         | 2,1         | 4,0                | 54,7                    |
|        | Anestesiologia                      | 24         | 1,8         | 3,6                | 58,3                    |
|        | Endocrinologia e Metabologia        | 21         | 1,6         | 3,1                | 61,4                    |
|        | Neurologia                          | 16         | 1,2         | 2,4                | 63,8                    |
|        | Otorrinolaringologia                | 16         | 1,2         | 2,4                | 66,2                    |
|        | Ortopedia e Traumatologia           | 14         | 1,1         | 2,1                | 68,2                    |
|        | Patologia                           | 14         | 1,1         | 2,1                | 70,3                    |
|        | Infectologia                        | 13         | 1,0         | 1,9                | 72,3                    |
|        | Oftalmologia                        | 13         | 1,0         | 1,9                | 74,2                    |
|        | Gastroenterologia                   | 12         | ,9          | 1,8                | 76,0                    |
|        | Nefrologia                          | 12         | ,9          | 1,8                | 77,7                    |
|        | Reumatologia                        | 12         | ,9          | 1,8                | 79,5                    |
|        | Medicina de Família e Comunidade    | 10         | ,8          | 1,5                | 81,0                    |
|        | Cardiologia                         | 9          | ,7          | 1,3                | 82,3                    |
|        | Geriatria                           | 9          | ,7          | 1,3                | 83,7                    |
|        | Hematologia e Hemoterapia           | 8          | ,6          | 1,2                | 84,9                    |
|        | Neonatologia                        | 7          | ,5          | 1,0                | 85,9                    |

|        |                                        |      |       |       |       |
|--------|----------------------------------------|------|-------|-------|-------|
|        | Pneumologia                            | 7    | ,5    | 1,0   | 86,9  |
|        | Cirurgia Pediátrica                    | 6    | ,5    | ,9    | 87,8  |
|        | Medicina Intensiva                     | 6    | ,5    | ,9    | 88,7  |
|        | Neurocirurgia                          | 6    | ,5    | ,9    | 89,6  |
|        | Cirurgia do Aparelho Digestivo         | 5    | ,4    | ,7    | 90,4  |
|        | Cirurgia Plástica                      | 5    | ,4    | ,7    | 91,1  |
|        | Cirurgia Vascular                      | 5    | ,4    | ,7    | 91,8  |
|        | Neurologia pediátrica                  | 5    | ,4    | ,7    | 92,6  |
|        | Urologia                               | 4    | ,3    | ,6    | 93,2  |
|        | Infectologia pediátrica                | 3    | ,2    | ,4    | 93,6  |
|        | Alergia e Imunologia                   | 3    | ,2    | ,4    | 94,1  |
|        | Medicina de Emergência                 | 3    | ,2    | ,4    | 94,5  |
|        | Medicina de família e comunidade       | 3    | ,2    | ,4    | 95,0  |
|        | MFC                                    | 3    | ,2    | ,4    | 95,4  |
|        | Pneumologia pediátrica                 | 3    | ,2    | ,4    | 95,8  |
|        | Endocrinologia pediátrica              | 2    | ,2    | ,3    | 96,1  |
|        | Endoscopia                             | 2    | ,2    | ,3    | 96,4  |
|        | Medicina da família e comunidade       | 2    | ,2    | ,3    | 96,7  |
|        | Oncologia Clínica                      | 2    | ,2    | ,3    | 97,0  |
|        | Medicina do Trabalho                   | 1    | ,1    | ,1    | 97,2  |
|        | Cardiologia pediátrica                 | 1    | ,1    | ,1    | 97,3  |
|        | Cirurgia Torácica                      | 1    | ,1    | ,1    | 97,5  |
|        | Coloproctologia                        | 1    | ,1    | ,1    | 97,6  |
|        | endoscopia                             | 1    | ,1    | ,1    | 97,8  |
|        | Ginecologia e obstetrícia              | 1    | ,1    | ,1    | 97,9  |
|        | Hepatologia                            | 1    | ,1    | ,1    | 98,1  |
|        | Homeopatia                             | 1    | ,1    | ,1    | 98,2  |
|        | Intensiva pediátrica                   | 1    | ,1    | ,1    | 98,4  |
|        | Mastologia                             | 1    | ,1    | ,1    | 98,5  |
|        | Medicina de emergência                 | 1    | ,1    | ,1    | 98,7  |
|        | MEDICINA DE EMERGENCIA                 | 1    | ,1    | ,1    | 98,8  |
|        | medicina de família e comunidade       | 1    | ,1    | ,1    | 99,0  |
|        | Medicina de família e comunidade       | 1    | ,1    | ,1    | 99,1  |
|        | Medicina de Família e Comunidade       | 1    | ,1    | ,1    | 99,3  |
|        | Medicina Física e Reabilitação         | 1    | ,1    | ,1    | 99,4  |
|        | medicina paliativa                     | 1    | ,1    | ,1    | 99,6  |
|        | neonatologia                           | 1    | ,1    | ,1    | 99,7  |
|        | Pré-requisito em Área Cirúrgica Básica | 1    | ,1    | ,1    | 99,9  |
|        | Psiquiatria da Infância e Adolescência | 1    | ,1    | ,1    | 100,0 |
|        | Total                                  | 674  | 51,3  | 100,0 |       |
| Omisso | 999                                    | 639  | 48,7  |       |       |
| Total  |                                        | 1313 | 100,0 |       |       |

FREQUENCIES VARIABLES=Wkload\_5P ExternWork CovidCare PPEAvail PPEAvail\_Classif  
 /BARChart PERCENT  
 /ORDER=VARIABLE.

Frequências

| Observações                 |                                             |                                                                                                                                  |
|-----------------------------|---------------------------------------------|----------------------------------------------------------------------------------------------------------------------------------|
| Saída criada                |                                             | 20-SEP-2020 11:19:04                                                                                                             |
| Comentários                 |                                             |                                                                                                                                  |
| Entrada                     | Dados                                       | C:\Users\User\Documents\Pesquisa\Fellow\FellowGenData_V1.sav                                                                     |
|                             | Conjunto de dados ativo                     | ConjuntodeDados1                                                                                                                 |
|                             | Filtro                                      | <none>                                                                                                                           |
|                             | Ponderação                                  | <none>                                                                                                                           |
|                             | Arquivo Dividido                            | <none>                                                                                                                           |
|                             | N de linhas em arquivo de dados de trabalho | 1313                                                                                                                             |
|                             |                                             |                                                                                                                                  |
| Tratamento de valor omissos | Definição de omissos                        | Os valores omissos definidos pelo usuário são tratados como omissos.                                                             |
|                             | Casos utilizados                            | As estatísticas estão baseadas em todos os casos com dados válidos.                                                              |
| Sintaxe                     |                                             | FREQUENCIES<br>VARIABLES=Wkload_5P<br>ExternWork CovidCare PPEAvail<br>PPEAvail_Classif<br>/BARChart PERCENT<br>/ORDER=VARIABLE. |
| Recursos                    | Tempo do processador                        | 00:00:01,61                                                                                                                      |
|                             | Tempo decorrido                             | 00:00:00,81                                                                                                                      |

Cumulative weekly workload (five categories)

## Estatísticas

Cumulative weekly workload (five categories)

|   |        |      |
|---|--------|------|
| N | Válido | 1313 |
|   | Omisso | 0    |

Cumulative weekly workload (five categories)

|        |               | Frequência | Porcentagem | Porcentagem válida | Porcentagem acumulativa |
|--------|---------------|------------|-------------|--------------------|-------------------------|
| Válido | --- 24h       | 11         | ,8          | ,8                 | ,8                      |
|        | >24h --- 60h  | 530        | 40,4        | 40,4               | 41,2                    |
|        | >60h --- 90h  | 682        | 51,9        | 51,9               | 93,1                    |
|        | >90h --- 120h | 81         | 6,2         | 6,2                | 99,3                    |
|        | >120h         | 9          | ,7          | ,7                 | 100,0                   |
|        | Total         | 1313       | 100,0       | 100,0              |                         |

Cumulative weekly workload (five categories)

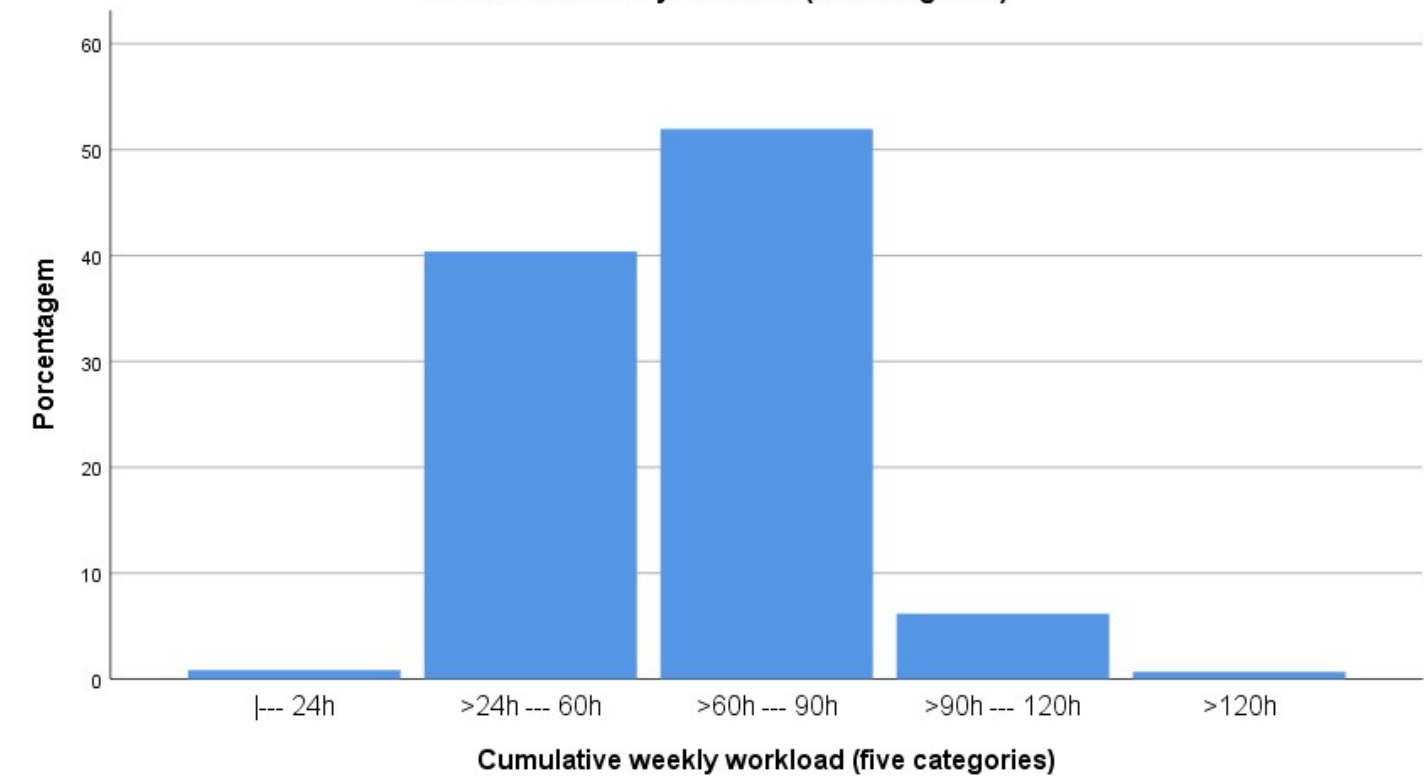

The participant exerts professional activity external to the residency program

Estadísticas

The participant exerts professional activity external to the residency program

|   |        |      |
|---|--------|------|
| N | Válido | 1313 |
|   | Omisso | 0    |

The participant exerts professional activity external to the residency program

|        |       | Frequência | Porcentagem | Porcentagem válida | Porcentagem acumulativa |
|--------|-------|------------|-------------|--------------------|-------------------------|
| Válido | No    | 889        | 67,7        | 67,7               | 67,7                    |
|        | Yes   | 424        | 32,3        | 32,3               | 100,0                   |
|        | Total | 1313       | 100,0       | 100,0              |                         |

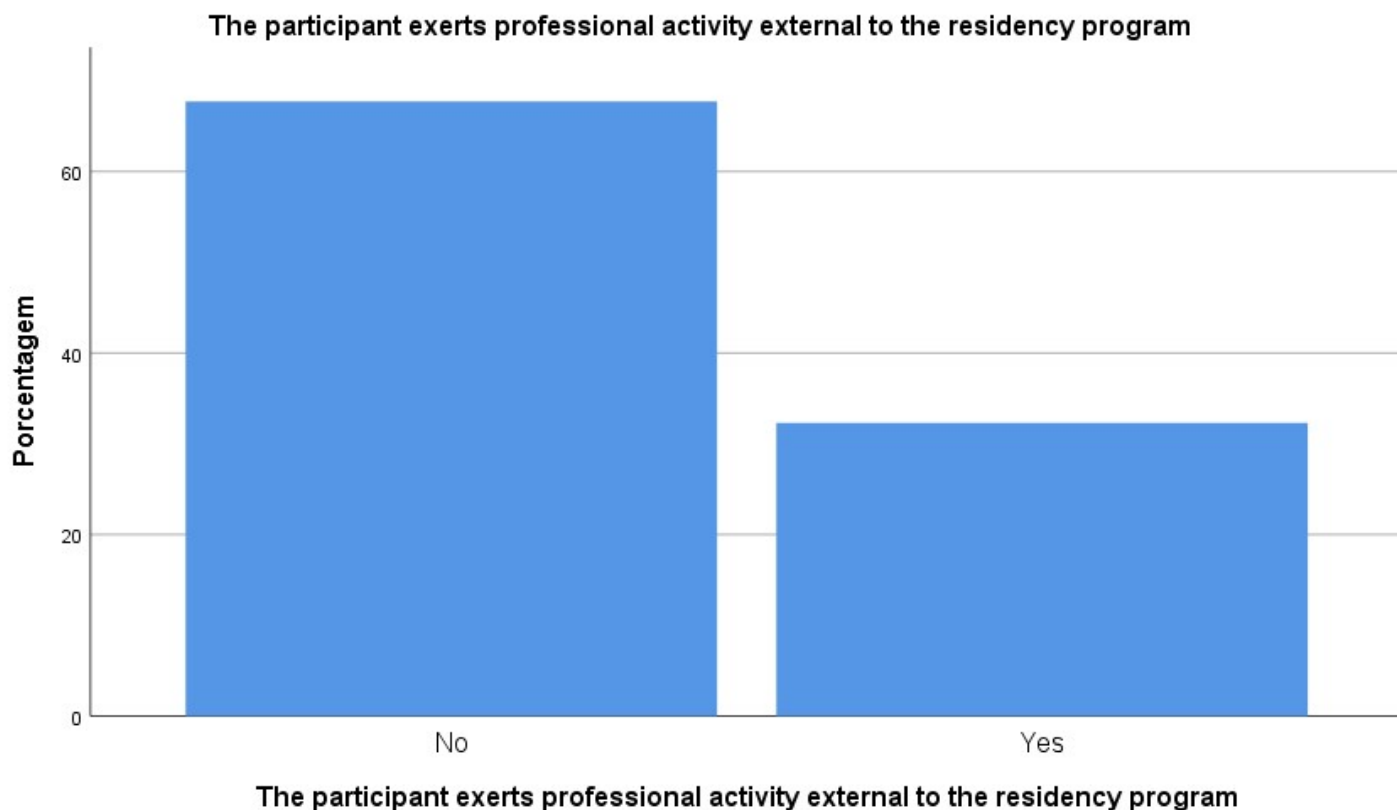

The participant provides direct health care for COVID19 patients

### Estatísticas

The participant provides direct health care for COVID19 patients

|   |        |      |
|---|--------|------|
| N | Válido | 1313 |
|   | Omisso | 0    |

### The participant provides direct health care for COVID19 patients

|        |       | Frequência | Porcentagem | Porcentagem válida | Porcentagem acumulativa |
|--------|-------|------------|-------------|--------------------|-------------------------|
| Válido | No    | 523        | 39,8        | 39,8               | 39,8                    |
|        | Yes   | 790        | 60,2        | 60,2               | 100,0                   |
|        | Total | 1313       | 100,0       | 100,0              |                         |

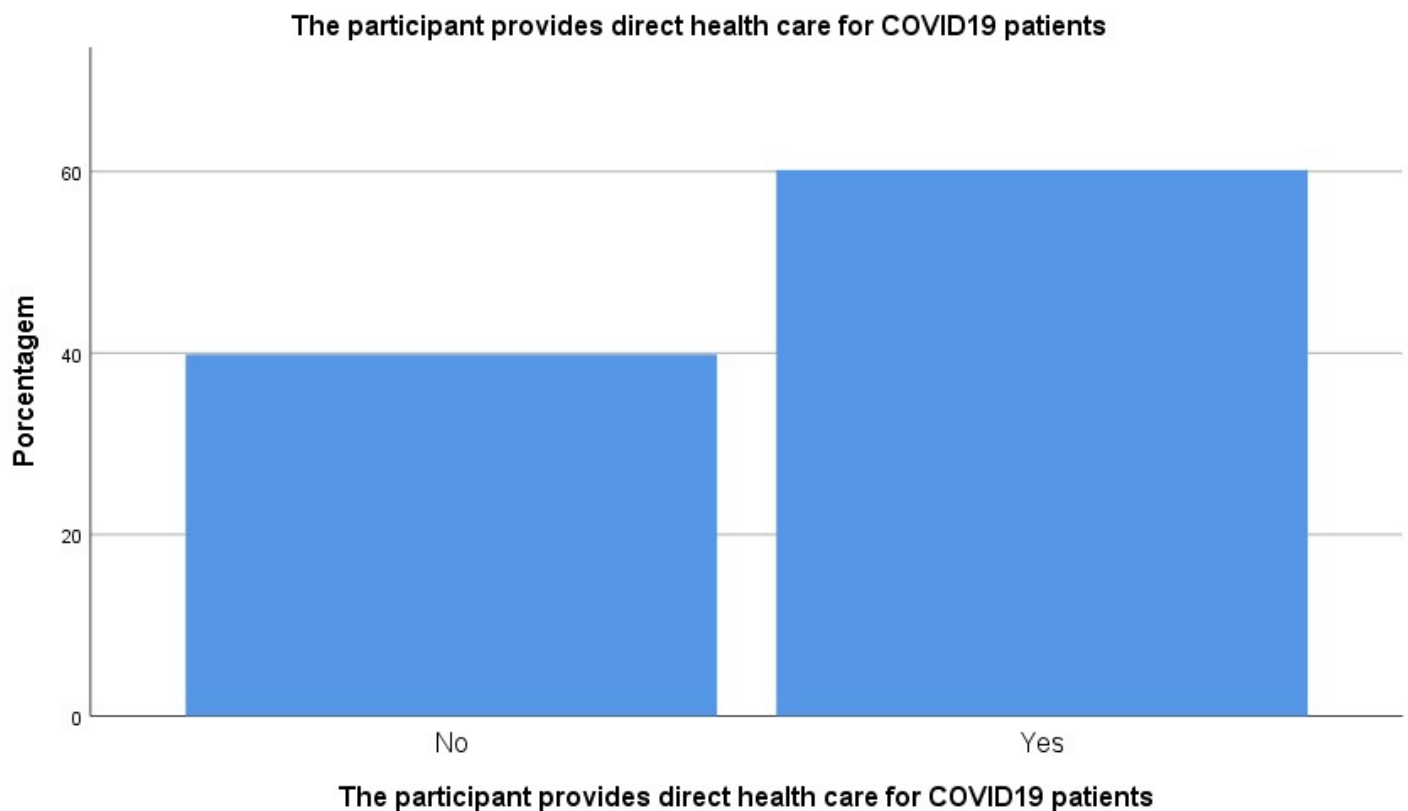

Na sua prática profissional, especialmente no atendimento a pacientes, por quanto tempo você tem acesso a equipamentos de proteção individual (EPI) suficientes e adequados? (Lickert 1-5)

### Estatísticas

Na sua prática profissional,  
especialmente no atendimento a  
pacientes, por quanto tempo você tem  
acesso a equipamentos de proteção  
individual (EPI) suficientes e adequados?  
(Lickert 1-5)

|   |        |      |
|---|--------|------|
| N | Válido | 1313 |
|   | Omisso | 0    |

**Na sua prática profissional, especialmente no atendimento a pacientes, por quanto tempo você tem acesso a equipamentos de proteção individual (EPI) suficientes e adequados? (Lickert 1-5)**

|        |                             | Frequência | Porcentagem | Porcentagem válida | Porcentagem acumulativa |
|--------|-----------------------------|------------|-------------|--------------------|-------------------------|
| Válido | Em nenhum momento           | 18         | 1,4         | 1,4                | 1,4                     |
|        | Em menos da metade do tempo | 87         | 6,6         | 6,6                | 8,0                     |
|        | Na metade do tempo          | 176        | 13,4        | 13,4               | 21,4                    |

|                            |      |       |       |       |
|----------------------------|------|-------|-------|-------|
| Em mais da metade do tempo | 483  | 36,8  | 36,8  | 58,2  |
| O tempo todo               | 549  | 41,8  | 41,8  | 100,0 |
| Total                      | 1313 | 100,0 | 100,0 |       |

**Na sua prática profissional, especialmente no atendimento a pacientes, por quanto tempo você tem acesso a equipamentos de proteção individual (EPI) suficientes e adequados? (Lickert 1-5)**

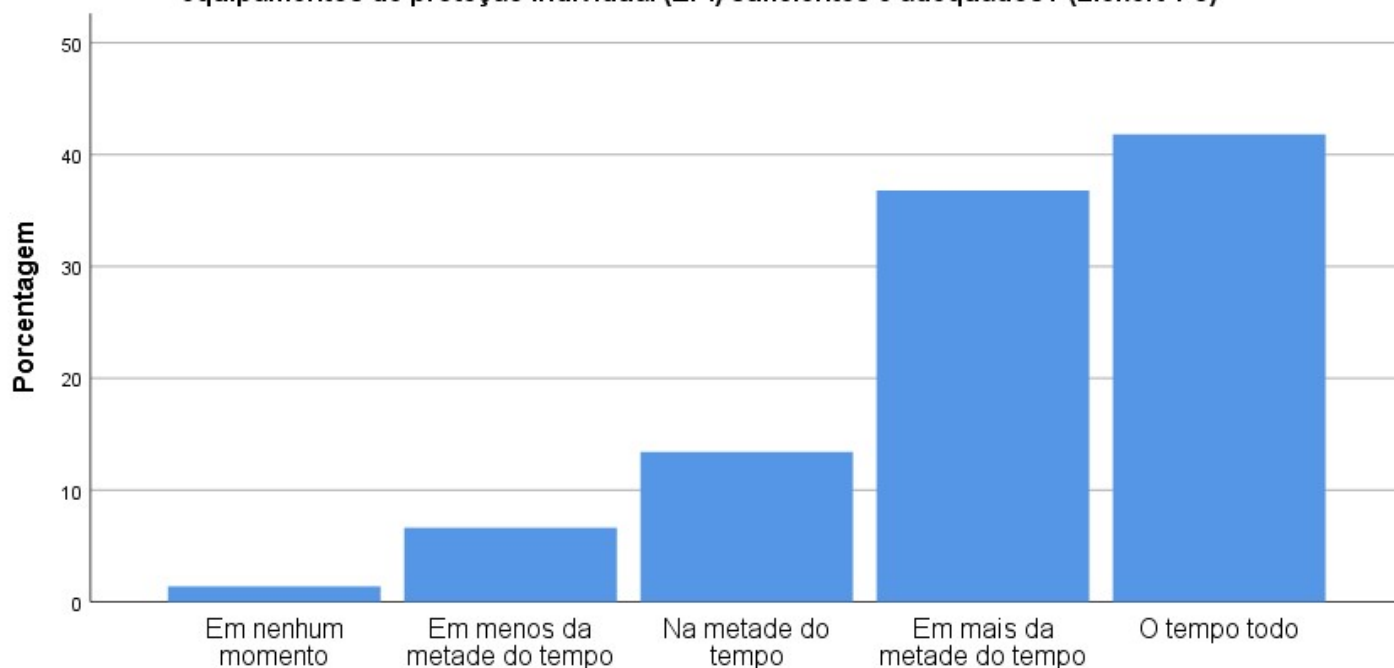

**Na sua prática profissional, especialmente no atendimento a pacientes, por quanto tempo você tem acesso a equipamentos de proteção individual (EPI) suficientes e adequados? (Lickert 1-5)**

Perceived adequacy of the availability of personal protective equipment, when providing care for patients in the residency program

### Estatísticas

Perceived adequacy of the availability of personal protective equipment, when providing care for patients in the residency program

|   |        |      |
|---|--------|------|
| N | Válido | 1313 |
|   | Omisso | 0    |

**Perceived adequacy of the availability of personal protective equipment, when providing care for patients in the residency program**

|        |               | Frequência | Porcentagem | Porcentagem válida | Porcentagem acumulativa |
|--------|---------------|------------|-------------|--------------------|-------------------------|
| Válido | Poor adequacy | 281        | 21,4        | 21,4               | 21,4                    |
|        | Good adequacy | 1032       | 78,6        | 78,6               | 100,0                   |

|       |      |       |       |
|-------|------|-------|-------|
| Total | 1313 | 100,0 | 100,0 |
|-------|------|-------|-------|

**Perceived adequacy of the availability of personal protective equipment, when providing care for patients in the residency program**

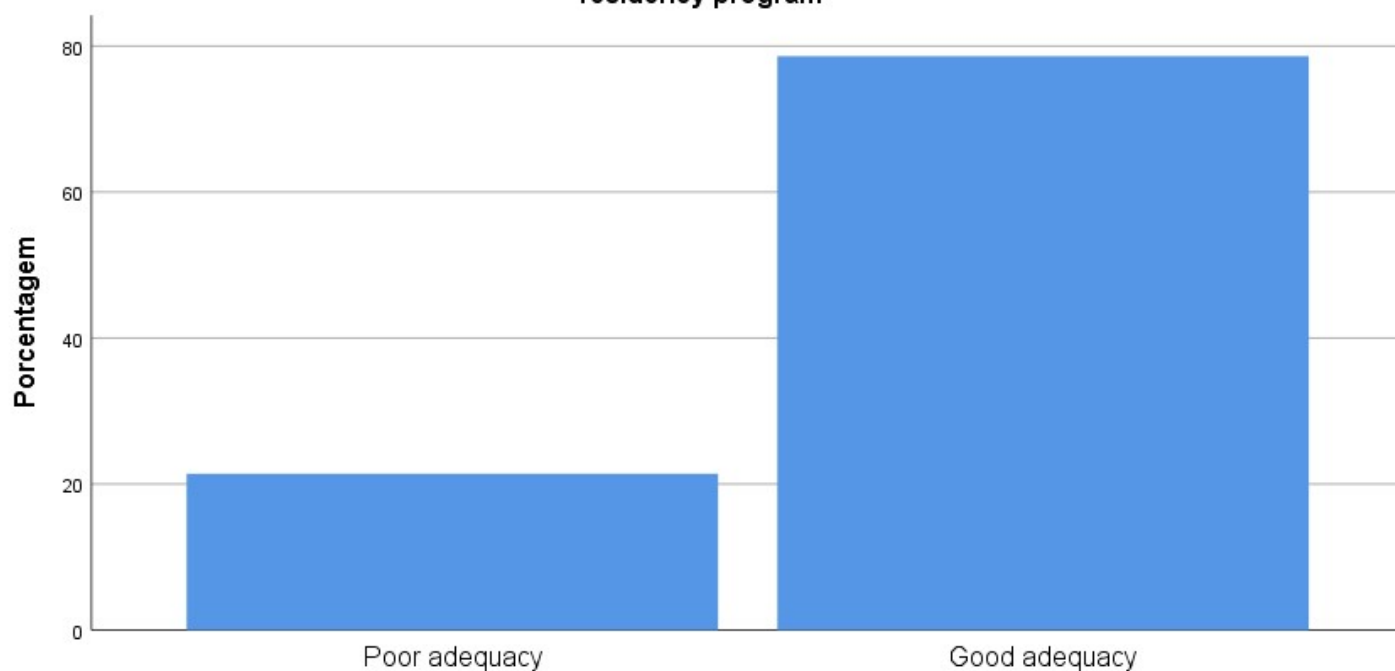

**Perceived adequacy of the availability of personal protective equipment, when providing care for patients in the residency program**

```
EXAMINE VARIABLES=Age Autonomy PedagStruct
/PLOT HISTOGRAM NPLOT
/PERCENTILES(5,10,25,50,75,90,95) HAVERAGE
/STATISTICS DESCRIPTIVES
/CINTERVAL 95
/MISSING PAIRWISE
/NOTOTAL.
```

Explorar

### Observações

|              |                                             |                                                              |
|--------------|---------------------------------------------|--------------------------------------------------------------|
| Saída criada |                                             | 20-SEP-2020 11:20:19                                         |
| Comentários  |                                             |                                                              |
| Entrada      | Dados                                       | C:\Users\User\Documents\Pesquisa\Fellow\FellowGenData_V1.sav |
|              | Conjunto de dados ativo                     | ConjuntodeDados1                                             |
|              | Filtro                                      | <none>                                                       |
|              | Ponderação                                  | <none>                                                       |
|              | Arquivo Dividido                            | <none>                                                       |
|              | N de linhas em arquivo de dados de trabalho | 1313                                                         |
|              |                                             |                                                              |

|                             |                      |                                                                                                                                                                                                         |
|-----------------------------|----------------------|---------------------------------------------------------------------------------------------------------------------------------------------------------------------------------------------------------|
| Tratamento de valor omissos | Definição de omissos | Os valores omissos definidos pelo usuário para variáveis dependentes são tratados como omissos.                                                                                                         |
|                             | Casos utilizados     | As estatísticas são baseadas em casos sem valores omissos para a variável dependente ou fatores que estão sendo analisados.                                                                             |
| Sintaxe                     |                      | EXAMINE VARIABLES=Age<br>Autonomy PedagStruct<br>/PLOT HISTOGRAM NPLOT<br><br>/PERCENTILES(5,10,25,50,75,90,95) HAVERAGE<br>/STATISTICS DESCRIPTIVES<br>/CINTERVAL 95<br>/MISSING PAIRWISE<br>/NOTOTAL. |
| Recursos                    | Tempo do processador | 00:00:01,78                                                                                                                                                                                             |
|                             | Tempo decorrido      | 00:00:01,53                                                                                                                                                                                             |

### Resumo de processamento do caso

|                                                                                                                           | Válido |             | Casos Omissos |             | Total |             |
|---------------------------------------------------------------------------------------------------------------------------|--------|-------------|---------------|-------------|-------|-------------|
|                                                                                                                           | N      | Porcentagem | N             | Porcentagem | N     | Porcentagem |
| Age                                                                                                                       | 1230   | 93,7%       | 83            | 6,3%        | 1313  | 100,0%      |
| Na sua opinião, qual o seu grau de autonomia para decidir condutas no trabalho? (EAV 1-10)                                | 1313   | 100,0%      | 0             | 0,0%        | 1313  | 100,0%      |
| Na sua opinião, qual o grau de adequação da organização pedagógica de seu programa de residência profissional? (EAV 1-10) | 1313   | 100,0%      | 0             | 0,0%        | 1313  | 100,0%      |

### Descritivos

|     |                                                 | Estatística | Erro Erro |
|-----|-------------------------------------------------|-------------|-----------|
| Age | Média                                           | 27,86       | ,126      |
|     | 95% Intervalo de Confiança para Limite inferior | 27,61       |           |
|     | Média Limite superior                           | 28,11       |           |
|     | 5% da média aparada                             | 27,44       |           |
|     | Mediana                                         | 27,00       |           |
|     | Variância                                       | 19,435      |           |
|     | Erro Desvio                                     | 4,409       |           |

|                                                                                                                           |                                 |                 |       |      |
|---------------------------------------------------------------------------------------------------------------------------|---------------------------------|-----------------|-------|------|
|                                                                                                                           | Mínimo                          |                 | 20    |      |
|                                                                                                                           | Máximo                          |                 | 61    |      |
|                                                                                                                           | Intervalo                       |                 | 41    |      |
|                                                                                                                           | Amplitude interquartil          |                 | 5     |      |
|                                                                                                                           | Assimetria                      |                 | 2,146 | ,070 |
|                                                                                                                           | Curtose                         |                 | 8,739 | ,139 |
|                                                                                                                           |                                 |                 |       |      |
| Na sua opinião, qual o seu grau de autonomia para decidir condutas no trabalho? (EAV 1-10)                                | Média                           |                 | 6,51  | ,058 |
|                                                                                                                           | 95% Intervalo de Confiança para | Limite inferior | 6,39  |      |
|                                                                                                                           | Média                           | Limite superior | 6,62  |      |
|                                                                                                                           | 5% da média aparada             |                 | 6,59  |      |
|                                                                                                                           | Mediana                         |                 | 7,00  |      |
|                                                                                                                           | Variância                       |                 | 4,433 |      |
|                                                                                                                           | Erro Desvio                     |                 | 2,105 |      |
|                                                                                                                           | Mínimo                          |                 | 1     |      |
|                                                                                                                           | Máximo                          |                 | 10    |      |
|                                                                                                                           | Intervalo                       |                 | 9     |      |
|                                                                                                                           | Amplitude interquartil          |                 | 3     |      |
|                                                                                                                           | Assimetria                      |                 | -,694 | ,068 |
|                                                                                                                           | Curtose                         |                 | -,062 | ,135 |
|                                                                                                                           |                                 |                 |       |      |
|                                                                                                                           |                                 |                 |       |      |
| Na sua opinião, qual o grau de adequação da organização pedagógica de seu programa de residência profissional? (EAV 1-10) | Média                           |                 | 5,77  | ,068 |
|                                                                                                                           | 95% Intervalo de Confiança para | Limite inferior | 5,64  |      |
|                                                                                                                           | Média                           | Limite superior | 5,91  |      |
|                                                                                                                           | 5% da média aparada             |                 | 5,81  |      |
|                                                                                                                           | Mediana                         |                 | 6,00  |      |
|                                                                                                                           | Variância                       |                 | 6,097 |      |
|                                                                                                                           | Erro Desvio                     |                 | 2,469 |      |
|                                                                                                                           | Mínimo                          |                 | 1     |      |
|                                                                                                                           | Máximo                          |                 | 10    |      |
|                                                                                                                           | Intervalo                       |                 | 9     |      |
|                                                                                                                           | Amplitude interquartil          |                 | 4     |      |
|                                                                                                                           | Assimetria                      |                 | -,341 | ,068 |
|                                                                                                                           | Curtose                         |                 | -,828 | ,135 |
|                                                                                                                           |                                 |                 |       |      |
|                                                                                                                           |                                 |                 |       |      |

|                               |                                                                                            | Percentis |       |       |       |       |       |       |
|-------------------------------|--------------------------------------------------------------------------------------------|-----------|-------|-------|-------|-------|-------|-------|
|                               |                                                                                            | Percentis |       |       |       |       |       |       |
|                               |                                                                                            | 5         | 10    | 25    | 50    | 75    | 90    | 95    |
| Média Ponderada (Definição 1) | Age                                                                                        | 23,00     | 24,00 | 25,00 | 27,00 | 30,00 | 33,00 | 36,00 |
|                               | Na sua opinião, qual o seu grau de autonomia para decidir condutas no trabalho? (EAV 1-10) | 2,00      | 3,00  | 5,00  | 7,00  | 8,00  | 9,00  | 9,00  |

|                |                                                                                                                           |      |      |       |       |       |      |      |
|----------------|---------------------------------------------------------------------------------------------------------------------------|------|------|-------|-------|-------|------|------|
|                | Na sua opinião, qual o grau de adequação da organização pedagógica de seu programa de residência profissional? (EAV 1-10) | 1,00 | 2,00 | 4,00  | 6,00  | 8,00  | 9,00 | 9,00 |
| Teste de Tukey | Age                                                                                                                       |      |      | 25,00 | 27,00 | 30,00 |      |      |
|                | Na sua opinião, qual o seu grau de autonomia para decidir condutas no trabalho? (EAV 1-10)                                |      |      | 5,00  | 7,00  | 8,00  |      |      |
|                | Na sua opinião, qual o grau de adequação da organização pedagógica de seu programa de residência profissional? (EAV 1-10) |      |      | 4,00  | 6,00  | 8,00  |      |      |

Testes de Normalidade

|                                                                                                                           | Kolmogorov-Smirnov <sup>a</sup> |      |      | Shapiro-Wilk |      |      |
|---------------------------------------------------------------------------------------------------------------------------|---------------------------------|------|------|--------------|------|------|
|                                                                                                                           | Estatística                     | df   | Sig. | Estatística  | df   | Sig. |
| Age                                                                                                                       | ,153                            | 1230 | ,000 | ,846         | 1230 | ,000 |
| Na sua opinião, qual o seu grau de autonomia para decidir condutas no trabalho? (EAV 1-10)                                | ,187                            | 1313 | ,000 | ,934         | 1313 | ,000 |
| Na sua opinião, qual o grau de adequação da organização pedagógica de seu programa de residência profissional? (EAV 1-10) | ,153                            | 1313 | ,000 | ,948         | 1313 | ,000 |

a. Correlação de Significância de Lilliefors

Age

Histograma

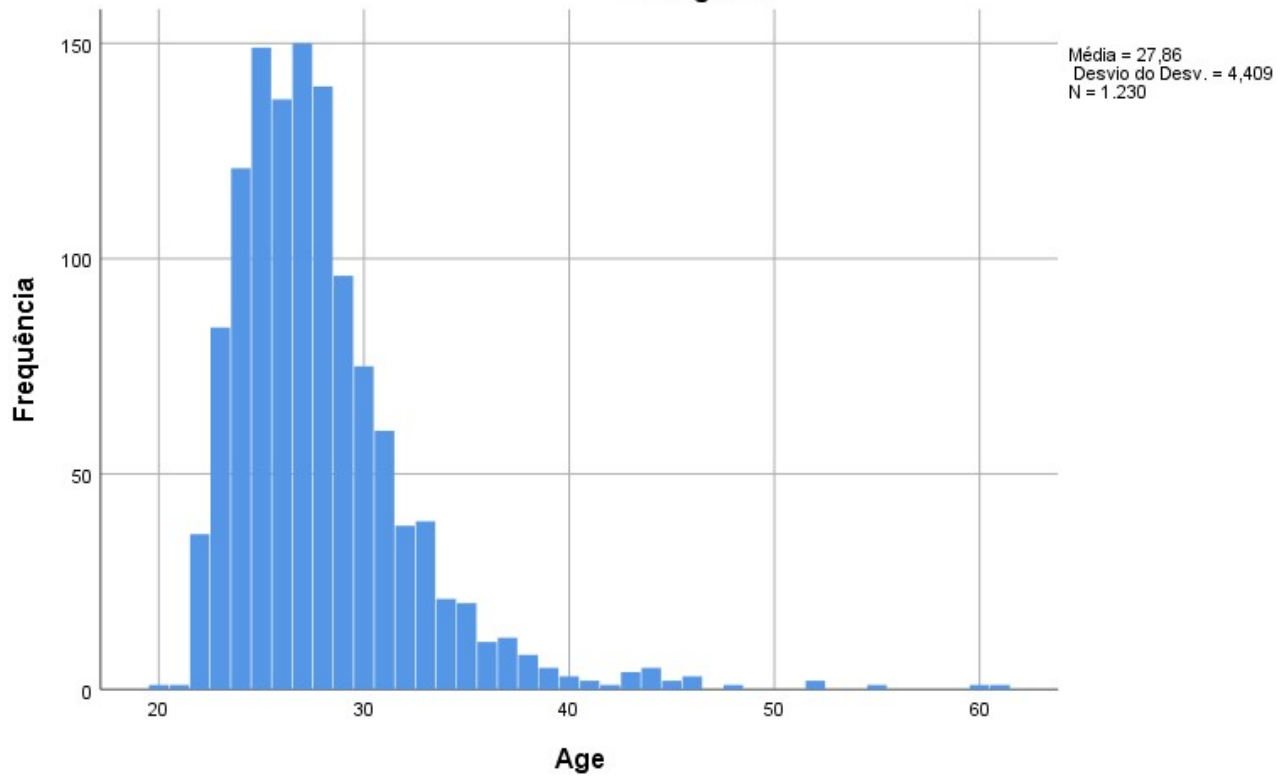

Gráfico Q-Q Normal de Age

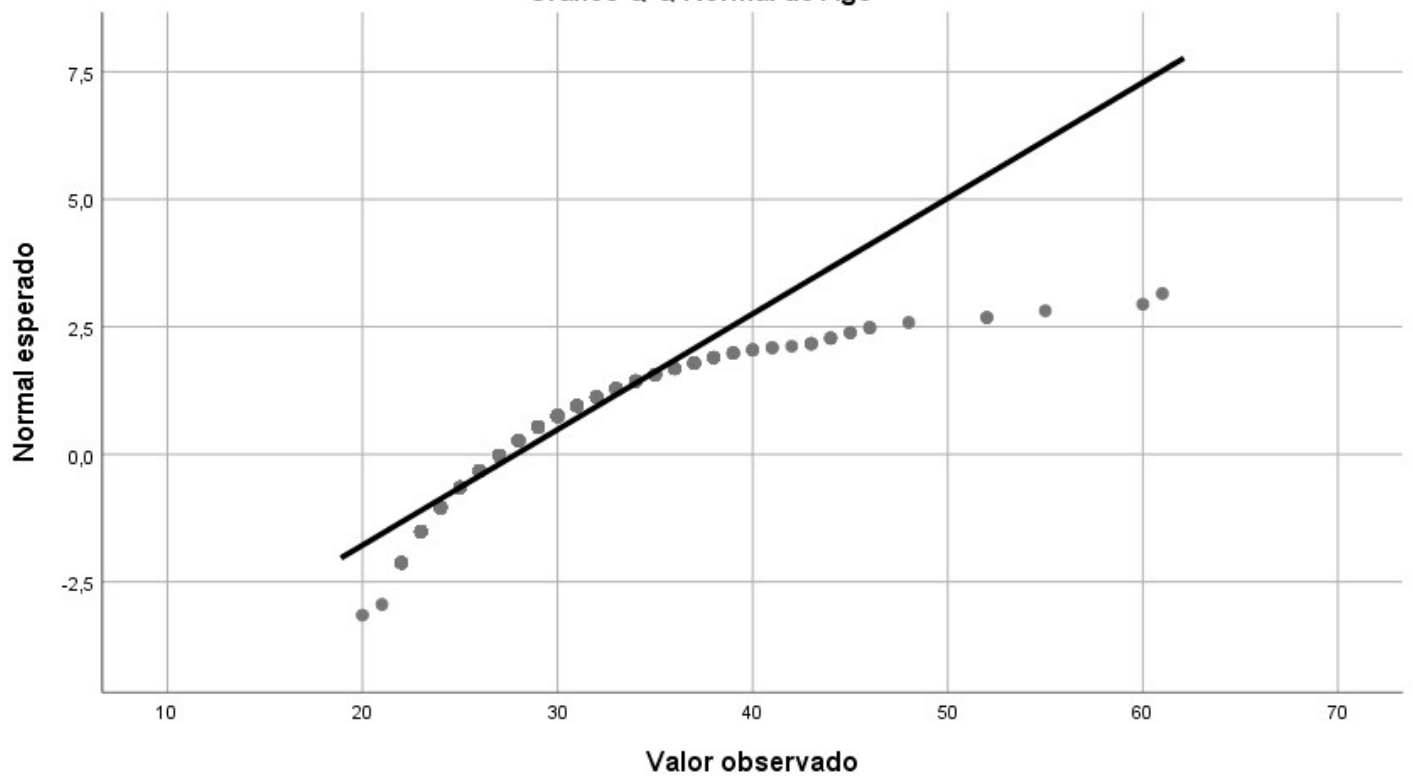

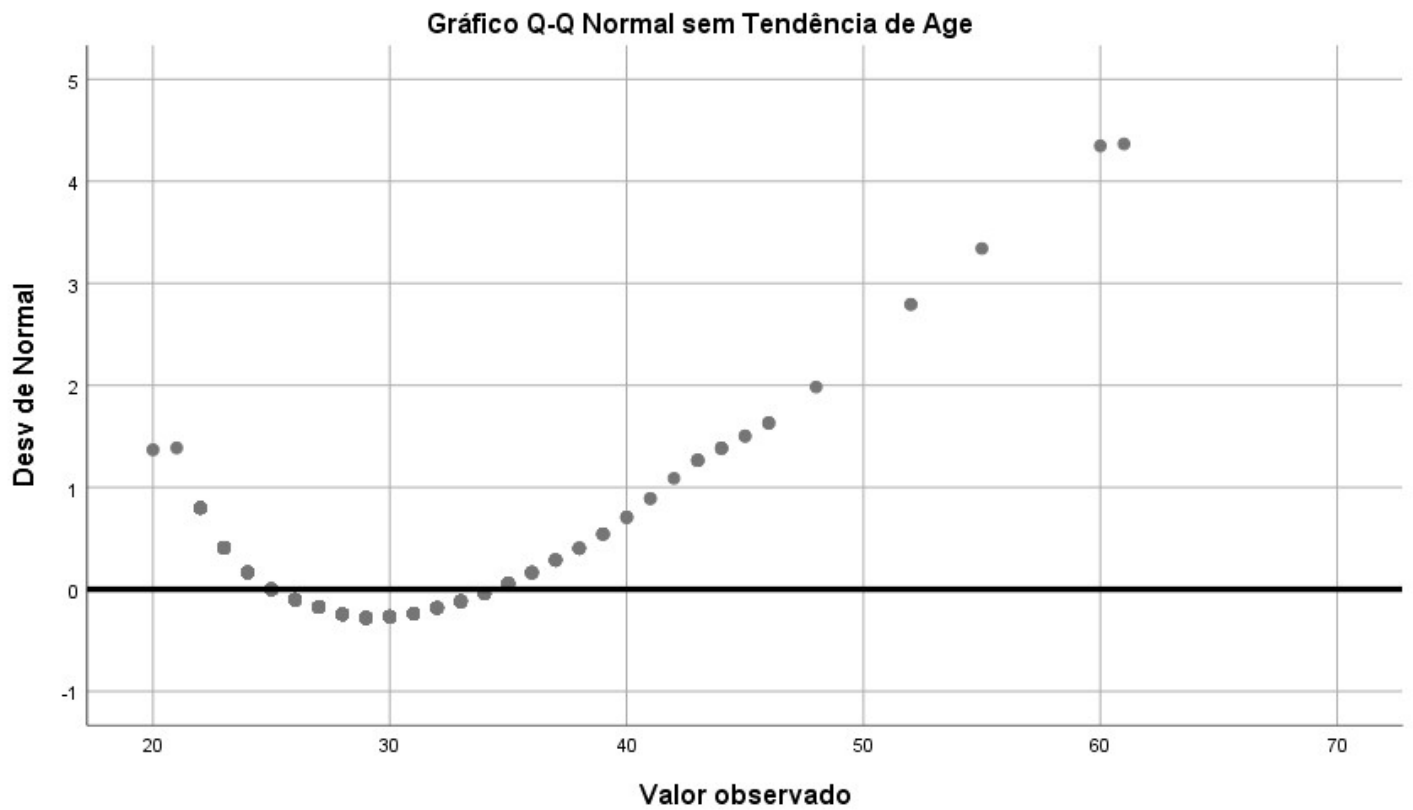

Na sua opinião, qual o seu grau de autonomia para decidir condutas no trabalho? (EAV 1-10)

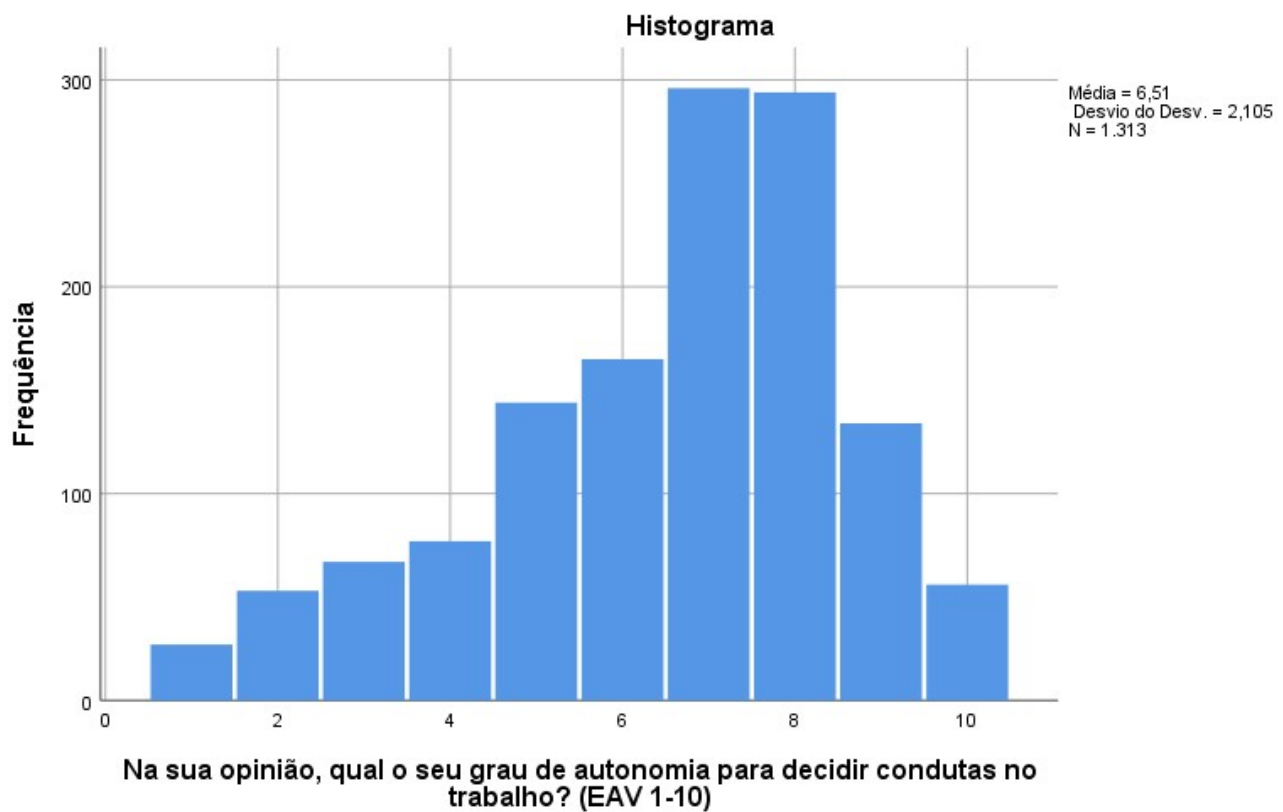

Gráfico Q-Q Normal de Na sua opinião, qual o seu grau de autonomia para decidir condutas no trabalho? (EAV 1-10)

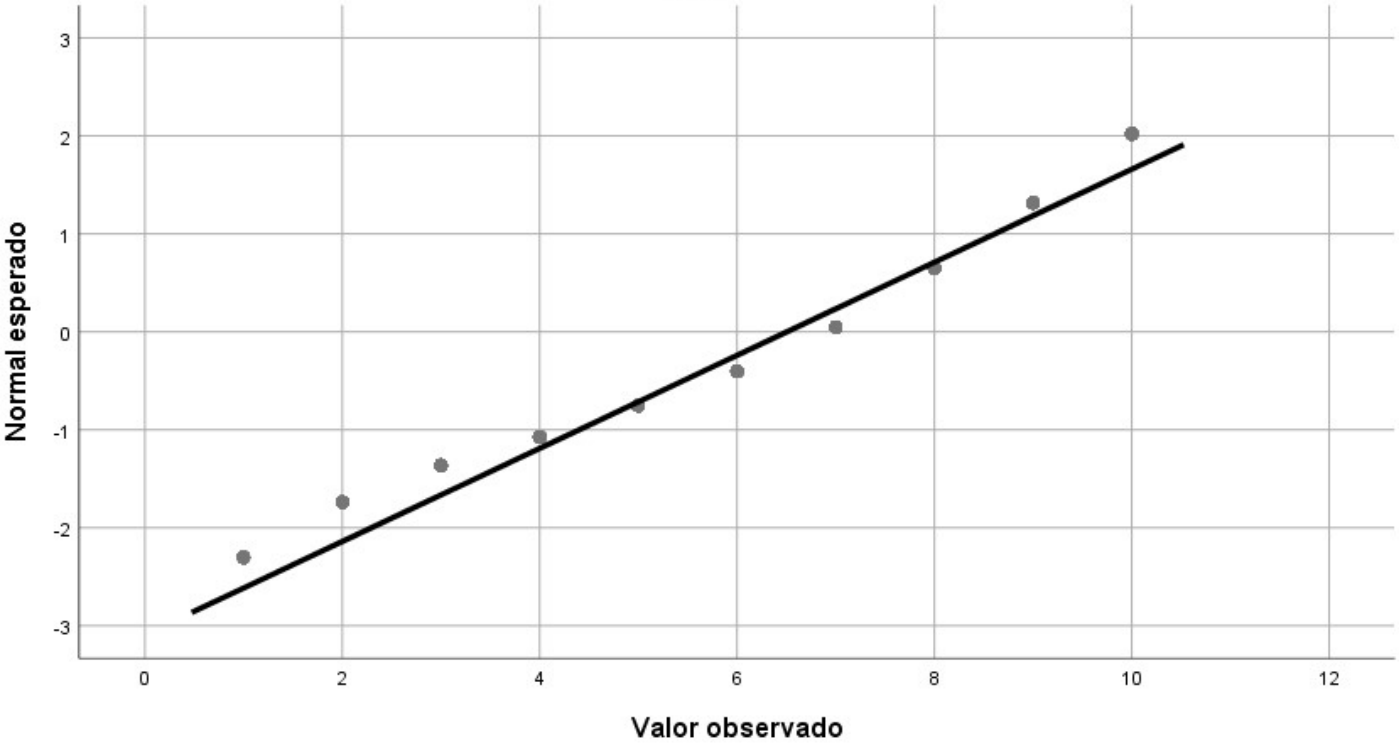

Gráfico Q-Q Normal sem Tendência de Na sua opinião, qual o seu grau de autonomia para decidir condutas no trabalho? (EAV 1-10)

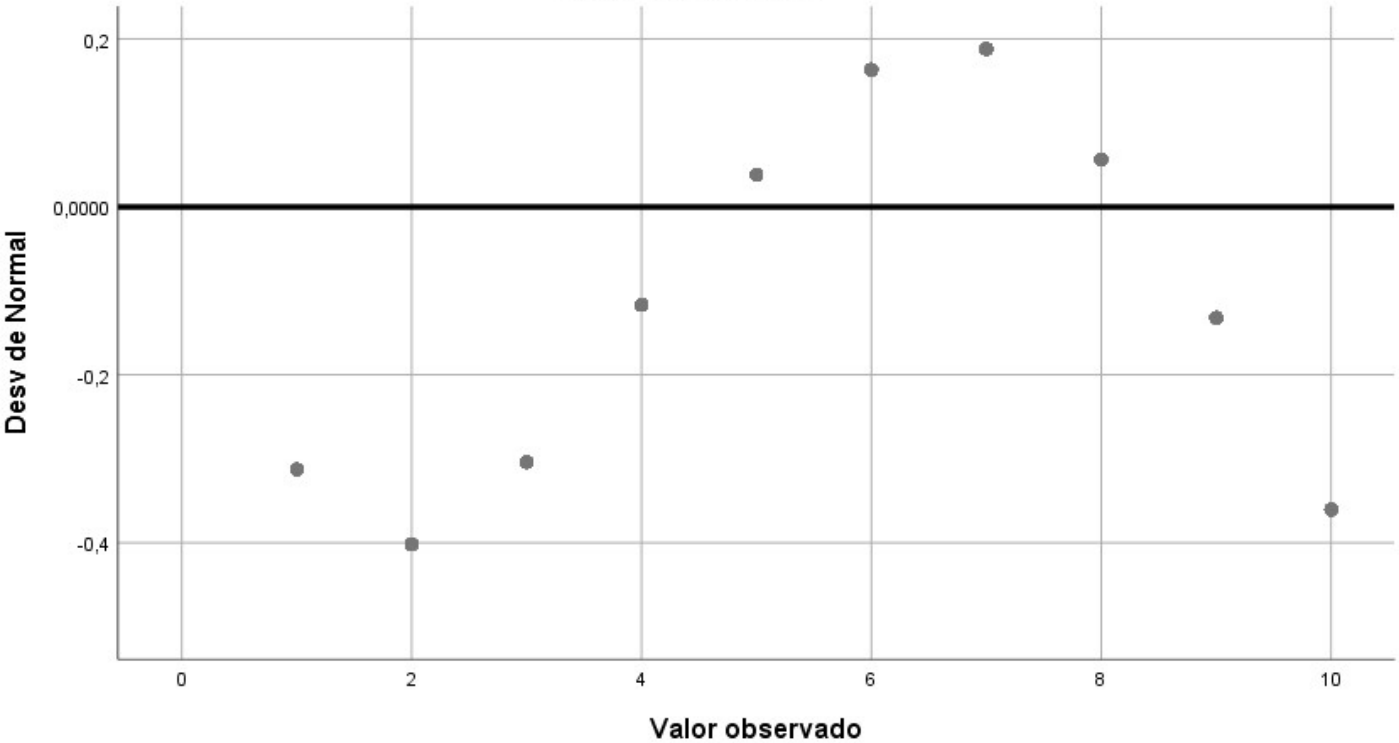

Na sua opinião, qual o grau de adequação da organização pedagógica de seu programa de residência profissional? (EAV 1-10)

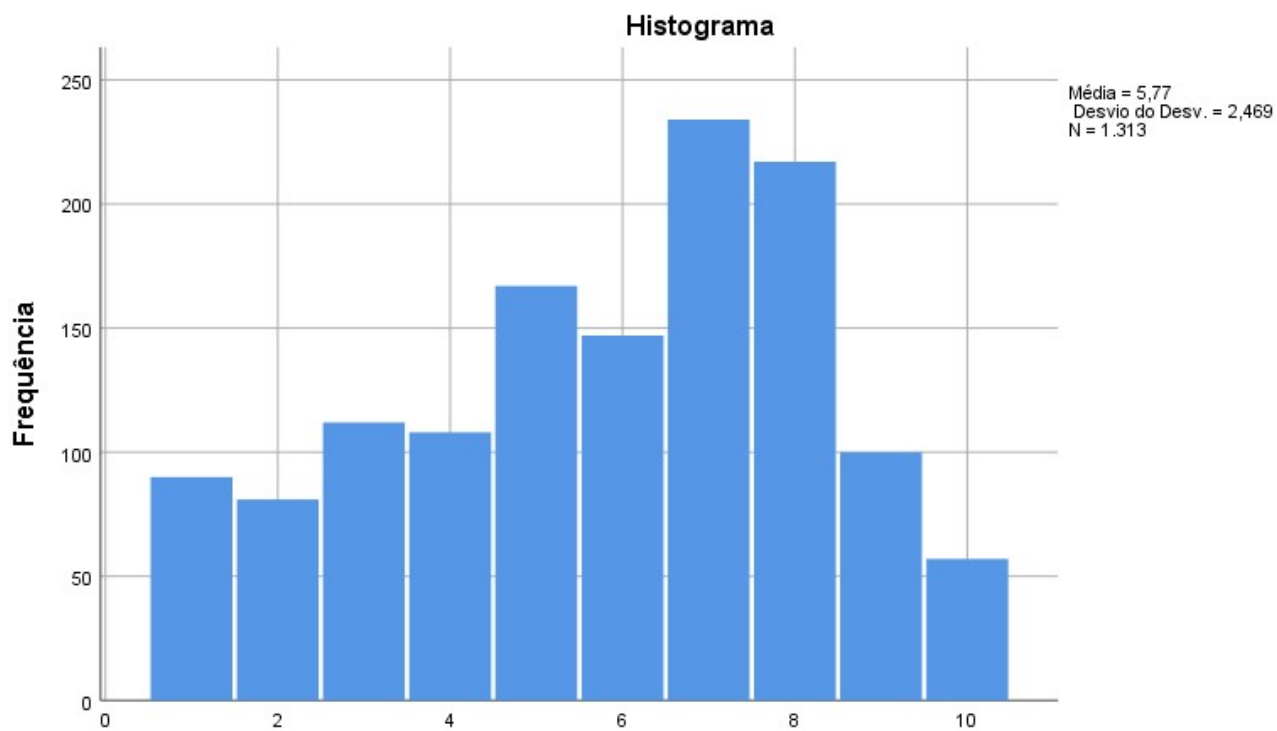

Na sua opinião, qual o grau de adequação da organização pedagógica de seu programa de residência profissional? (EAV 1-10)

Gráfico Q-Q Normal de Na sua opinião, qual o grau de adequação da organização pedagógica de seu programa de residência profissional? (EAV 1-10)

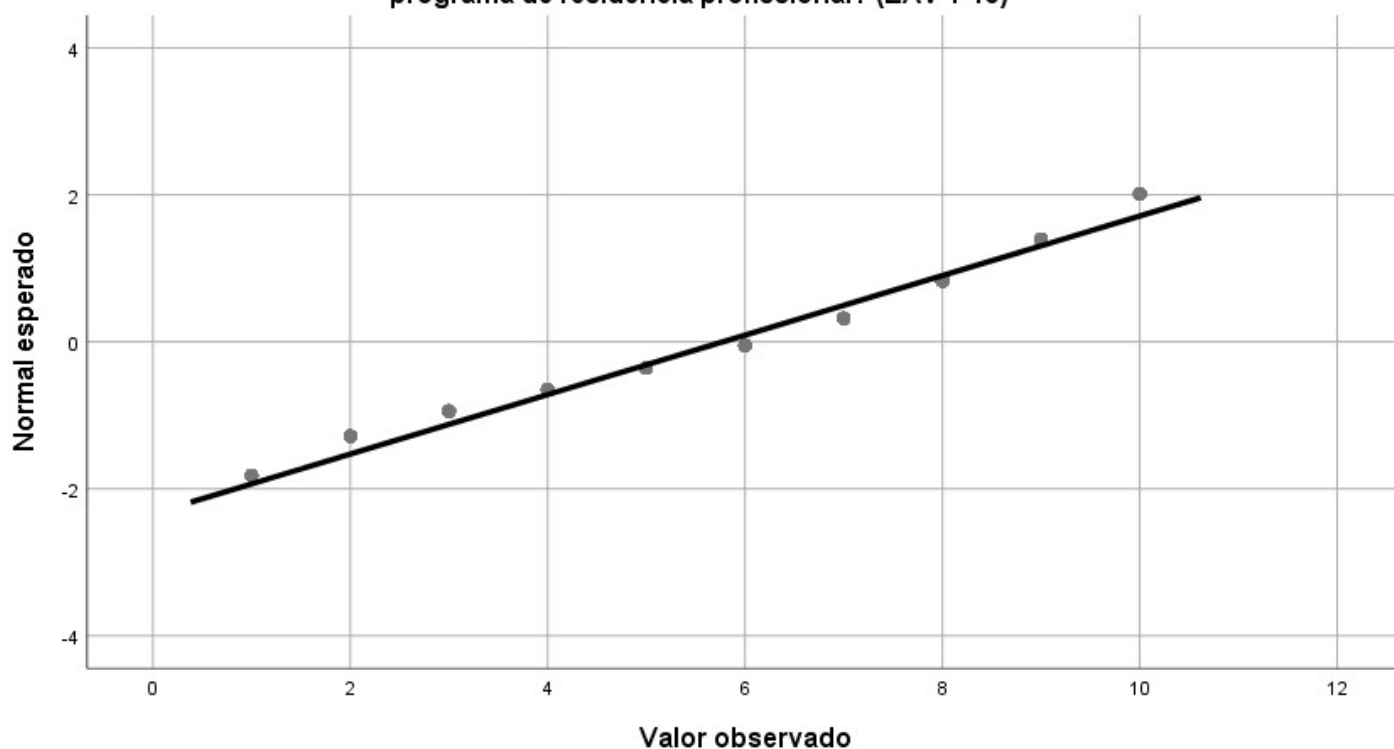

Gráfico Q-Q Normal sem Tendência de Na sua opinião, qual o grau de adequação da organização pedagógica de seu programa de residência profissional? (EAV 1-10)

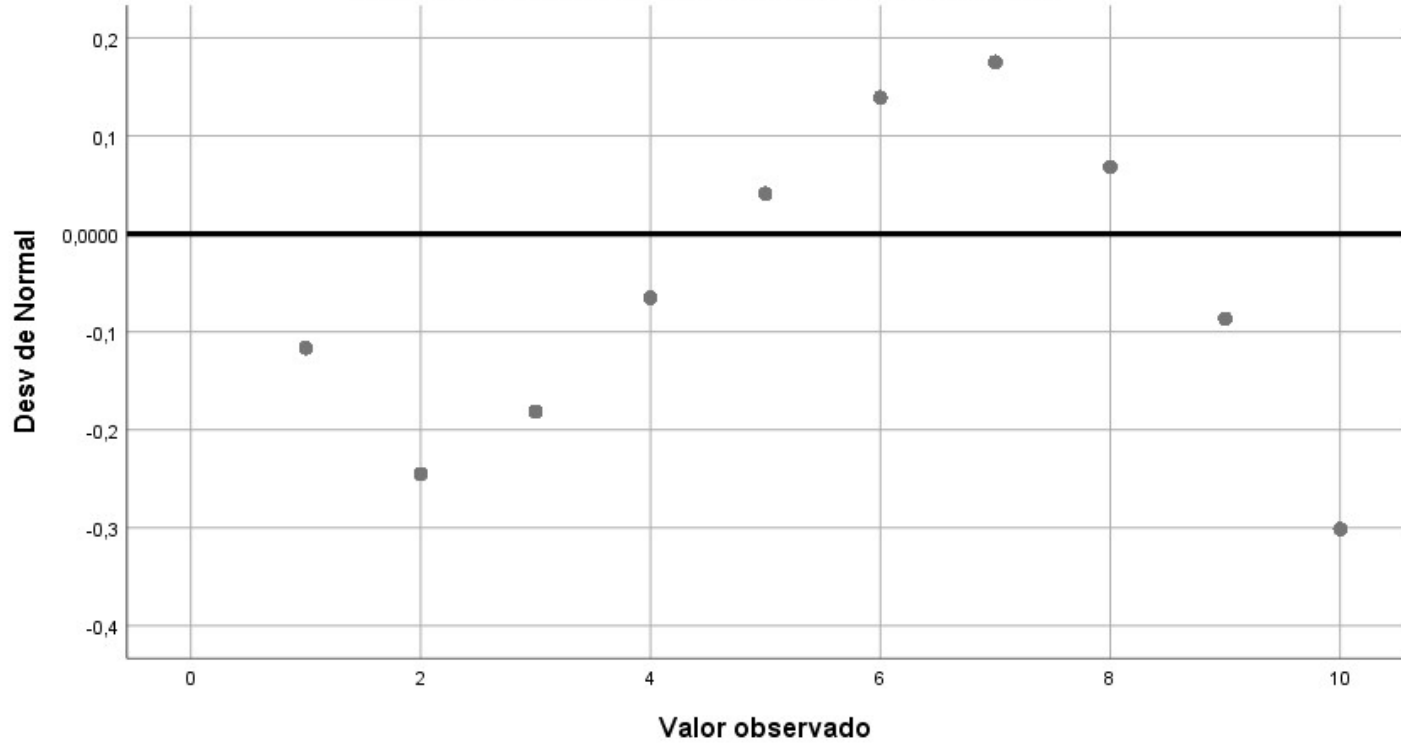

```
FREQUENCIES VARIABLES=Autonomy_Classif PedagStr_Classif
/BARCHART PERCENT
/ORDER=VARIABLE.
```

Frequências

| Observações                |                                             |                                                                      |
|----------------------------|---------------------------------------------|----------------------------------------------------------------------|
| Saída criada               |                                             | 20-SEP-2020 11:21:34                                                 |
| Comentários                |                                             |                                                                      |
| Entrada                    | Dados                                       | C:\Users\User\Documents\Pesquisa\Fellow\FellowGenData_V1.sav         |
|                            | Conjunto de dados ativo                     | ConjuntodeDados1                                                     |
|                            | Filtro                                      | <none>                                                               |
|                            | Ponderação                                  | <none>                                                               |
|                            | Arquivo Dividido                            | <none>                                                               |
|                            | N de linhas em arquivo de dados de trabalho | 1313                                                                 |
|                            |                                             |                                                                      |
| Tratamento de valor omisso | Definição de omisso                         | Os valores omissos definidos pelo usuário são tratados como omissos. |
|                            | Casos utilizados                            | As estatísticas estão baseadas em todos os casos com dados válidos.  |

|          |                      |                                                                                                        |
|----------|----------------------|--------------------------------------------------------------------------------------------------------|
| Sintaxe  |                      | FREQUENCIES<br>VARIABLES=Autonomy_Classif<br>PedagStr_Classif<br>/BARCHART PERCENT<br>/ORDER=VARIABLE. |
| Recursos | Tempo do processador | 00:00:00,36                                                                                            |
|          | Tempo decorrido      | 00:00:00,26                                                                                            |

Classification of the percieved autonomy to self-conduct in the residency program

Estatísticas

Classification of the percieved autonomy  
to self-conduct in the residency program

|   |        |      |
|---|--------|------|
| N | Válido | 1313 |
|   | Omisso | 0    |

Classification of the percieved autonomy to self-conduct in the residency program

|        |                           | Frequência | Porcentagem | Porcentagem válida | Porcentagem acumulativa |
|--------|---------------------------|------------|-------------|--------------------|-------------------------|
| Válido | Low autonomy              | 224        | 17,1        | 17,1               | 17,1                    |
|        | Moderate to high autonomy | 1089       | 82,9        | 82,9               | 100,0                   |
|        | Total                     | 1313       | 100,0       | 100,0              |                         |

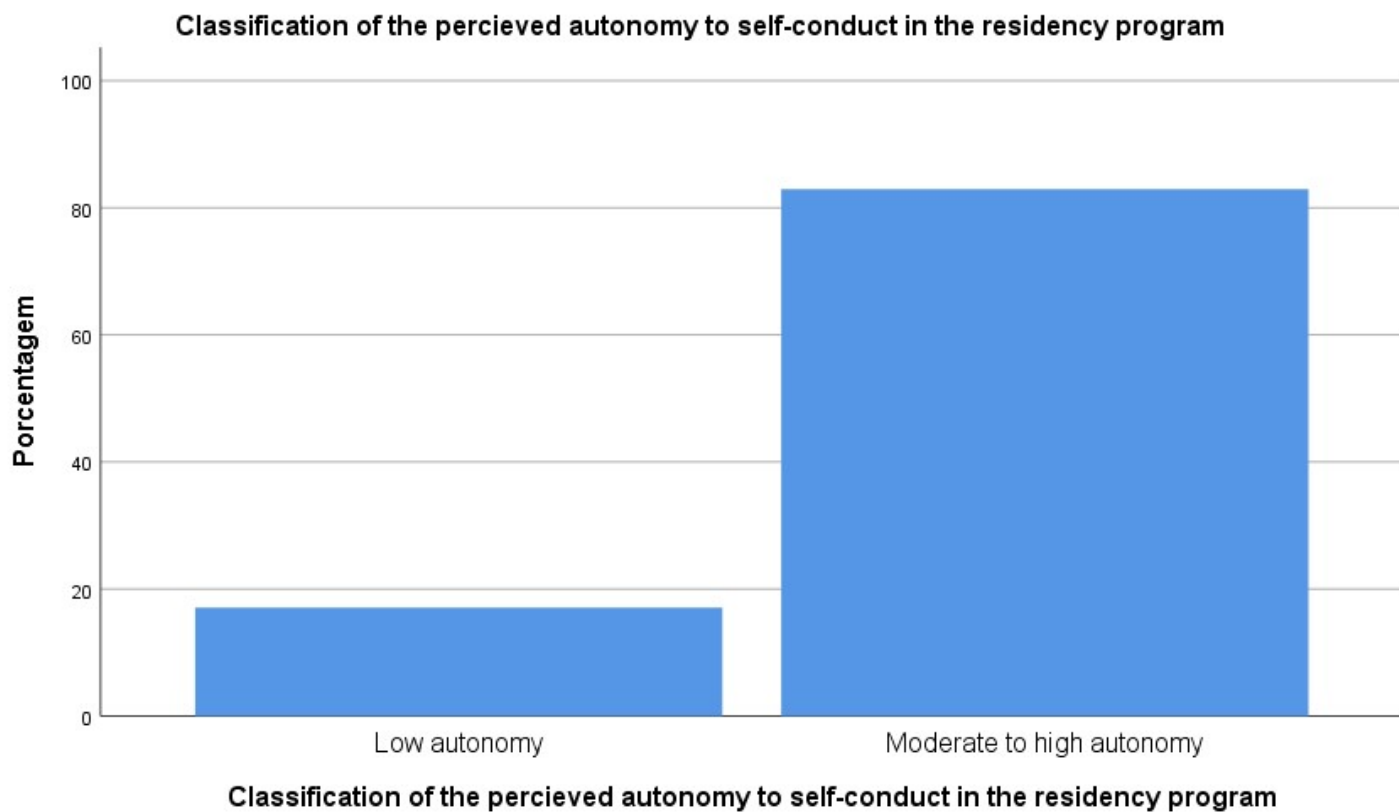

Percieved adequacy of the pedagogic structure and availability of resouces in the residency program

### Estatísticas

Percieved adequacy of the pedagogic structure and availability of resouces in the residency program

|   |        |      |
|---|--------|------|
| N | Válido | 1313 |
|   | Omisso | 0    |

### Percieved adequacy of the pedagogic structure and availability of resouces in the residency program

|        |                           | Frequência | Porcentagem | Porcentagem válida | Porcentagem acumulativa |
|--------|---------------------------|------------|-------------|--------------------|-------------------------|
| Válido | Poor adequacy             | 558        | 42,5        | 42,5               | 42,5                    |
|        | Moderate to good adequacy | 755        | 57,5        | 57,5               | 100,0                   |
|        | Total                     | 1313       | 100,0       | 100,0              |                         |

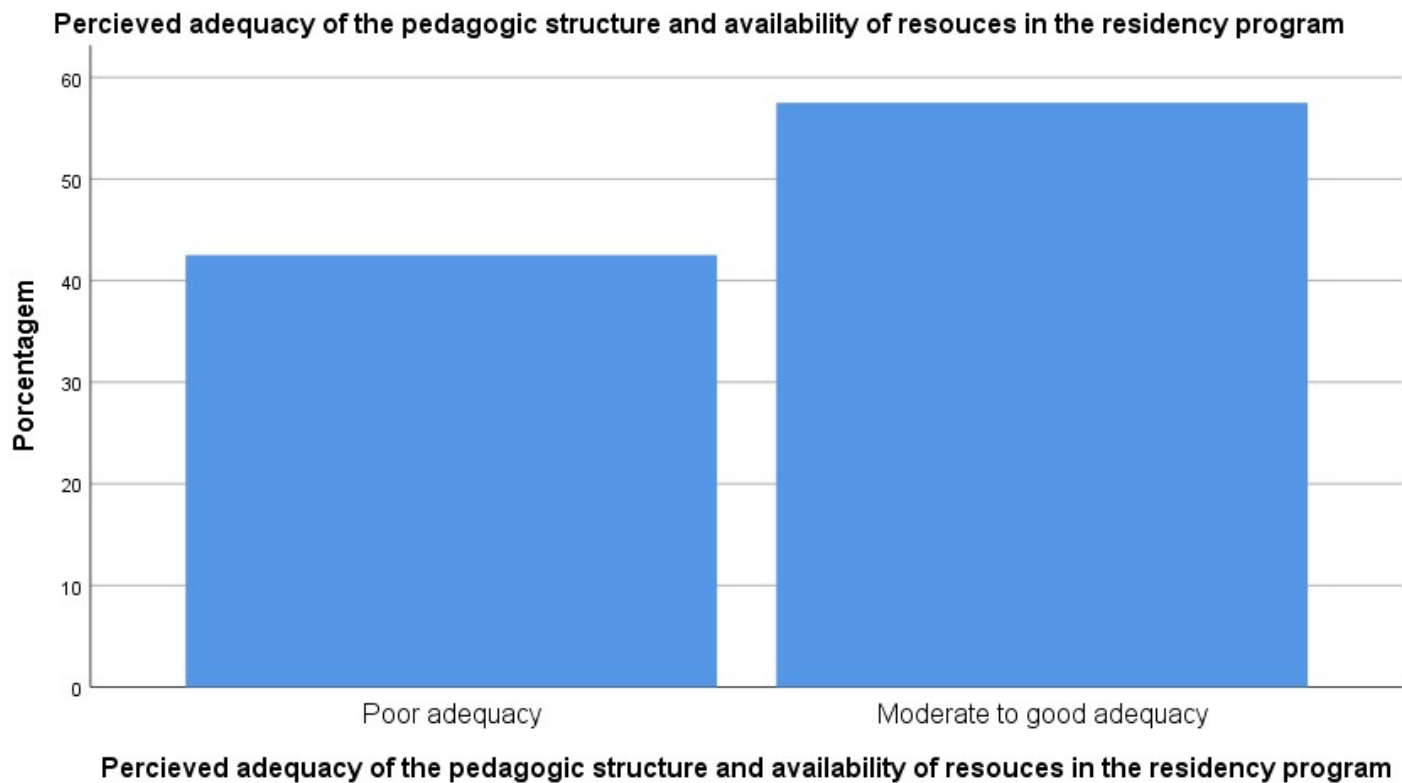

```

EXAMINE VARIABLES=DASS21_D DASS21_A DASS21_S PHQ9_Score BRCS_Score OLBI_D OLBI_E OLBI_Total
/PLOT HISTOGRAM NPLOT
/STATISTICS DESCRIPTIVES
/CINTERVAL 95
/MISSING PAIRWISE
/NOTOTAL.
  
```

Explorar

| Observações  |                                             |                                                              |
|--------------|---------------------------------------------|--------------------------------------------------------------|
| Saída criada |                                             | 20-SEP-2020 11:23:59                                         |
| Comentários  |                                             |                                                              |
| Entrada      | Dados                                       | C:\Users\User\Documents\Pesquisa\Fellow\FellowGenData_V1.sav |
|              | Conjunto de dados ativo                     | ConjuntodeDados1                                             |
|              | Filtro                                      | <none>                                                       |
|              | Ponderação                                  | <none>                                                       |
|              | Arquivo Dividido                            | <none>                                                       |
|              | N de linhas em arquivo de dados de trabalho | 1313                                                         |
|              |                                             |                                                              |

|                             |                                                                                                                                                                                                                 |                                                                                                                             |
|-----------------------------|-----------------------------------------------------------------------------------------------------------------------------------------------------------------------------------------------------------------|-----------------------------------------------------------------------------------------------------------------------------|
| Tratamento de valor omissos | Definição de omissos                                                                                                                                                                                            | Os valores omissos definidos pelo usuário para variáveis dependentes são tratados como omissos.                             |
|                             | Casos utilizados                                                                                                                                                                                                | As estatísticas são baseadas em casos sem valores omissos para a variável dependente ou fatores que estão sendo analisados. |
| Sintaxe                     | EXAMINE<br>VARIABLES=DASS21_D<br>DASS21_A DASS21_S<br>PHQ9_Score BRCS_Score<br>OLBI_D OLBI_E OLBI_Total<br>/PLOT HISTOGRAM NPLOT<br>/STATISTICS DESCRIPTIVES<br>/CINTERVAL 95<br>/MISSING PAIRWISE<br>/NOTOTAL. |                                                                                                                             |
| Recursos                    | Tempo do processador                                                                                                                                                                                            | 00:00:04,08                                                                                                                 |
|                             | Tempo decorrido                                                                                                                                                                                                 | 00:00:03,87                                                                                                                 |

### Resumo de processamento do caso

|                          | Válido |             | Casos Omissos |             | Total |             |
|--------------------------|--------|-------------|---------------|-------------|-------|-------------|
|                          | N      | Porcentagem | N             | Porcentagem | N     | Porcentagem |
| DASS21 Depression Score  | 1313   | 100,0%      | 0             | 0,0%        | 1313  | 100,0%      |
| DASS21 Anxiety Score     | 1313   | 100,0%      | 0             | 0,0%        | 1313  | 100,0%      |
| DASS21 Stress Score      | 1313   | 100,0%      | 0             | 0,0%        | 1313  | 100,0%      |
| PHQ9 Depression Score    | 1313   | 100,0%      | 0             | 0,0%        | 1313  | 100,0%      |
| BRCS Score               | 1313   | 100,0%      | 0             | 0,0%        | 1313  | 100,0%      |
| OLBI Disengagement Score | 1313   | 100,0%      | 0             | 0,0%        | 1313  | 100,0%      |
| OLBI Exhaustion Score    | 1313   | 100,0%      | 0             | 0,0%        | 1313  | 100,0%      |
| OLBI Total Score         | 1313   | 100,0%      | 0             | 0,0%        | 1313  | 100,0%      |

### Descritivos

|                         |                                                 | Estatística | Erro Erro |
|-------------------------|-------------------------------------------------|-------------|-----------|
| DASS21 Depression Score | Média                                           | 7,64        | ,156      |
|                         | 95% Intervalo de Confiança para Limite inferior | 7,34        |           |
|                         | Média Limite superior                           | 7,95        |           |
|                         | 5% da média aparada                             | 7,38        |           |
|                         | Mediana                                         | 7,00        |           |
|                         | Variância                                       | 31,985      |           |
|                         | Erro Desvio                                     | 5,656       |           |
|                         | Mínimo                                          | 0           |           |

|                       |                                 |                 |        |      |
|-----------------------|---------------------------------|-----------------|--------|------|
|                       | Máximo                          |                 | 21     |      |
|                       | Intervalo                       |                 | 21     |      |
|                       | Amplitude interquartil          |                 | 8      |      |
|                       | Assimetria                      |                 | ,611   | ,068 |
|                       | Curtose                         |                 | -,520  | ,135 |
| DASS21 Anxiety Score  | Média                           |                 | 6,03   | ,142 |
|                       | 95% Intervalo de Confiança para | Limite inferior | 5,75   |      |
|                       | Média                           | Limite superior | 6,31   |      |
|                       | 5% da média aparada             |                 | 5,66   |      |
|                       | Mediana                         |                 | 5,00   |      |
|                       | Variância                       |                 | 26,570 |      |
|                       | Erro Desvio                     |                 | 5,155  |      |
|                       | Mínimo                          |                 | 0      |      |
|                       | Máximo                          |                 | 21     |      |
|                       | Intervalo                       |                 | 21     |      |
|                       | Amplitude interquartil          |                 | 7      |      |
|                       | Assimetria                      |                 | ,829   | ,068 |
|                       | Curtose                         |                 | ,022   | ,135 |
| DASS21 Stress Score   | Média                           |                 | 10,15  | ,148 |
|                       | 95% Intervalo de Confiança para | Limite inferior | 9,86   |      |
|                       | Média                           | Limite superior | 10,44  |      |
|                       | 5% da média aparada             |                 | 10,12  |      |
|                       | Mediana                         |                 | 10,00  |      |
|                       | Variância                       |                 | 28,883 |      |
|                       | Erro Desvio                     |                 | 5,374  |      |
|                       | Mínimo                          |                 | 0      |      |
|                       | Máximo                          |                 | 21     |      |
|                       | Intervalo                       |                 | 21     |      |
|                       | Amplitude interquartil          |                 | 8      |      |
|                       | Assimetria                      |                 | ,107   | ,068 |
|                       | Curtose                         |                 | -,771  | ,135 |
| PHQ9 Depression Score | Média                           |                 | 12,00  | ,178 |
|                       | 95% Intervalo de Confiança para | Limite inferior | 11,65  |      |
|                       | Média                           | Limite superior | 12,35  |      |
|                       | 5% da média aparada             |                 | 11,91  |      |
|                       | Mediana                         |                 | 12,00  |      |
|                       | Variância                       |                 | 41,628 |      |
|                       | Erro Desvio                     |                 | 6,452  |      |
|                       | Mínimo                          |                 | 0      |      |
|                       | Máximo                          |                 | 27     |      |
|                       | Intervalo                       |                 | 27     |      |
|                       | Amplitude interquartil          |                 | 10     |      |
|                       | Assimetria                      |                 | ,188   | ,068 |
|                       | Curtose                         |                 | -,753  | ,135 |
| BRCS Score            | Média                           |                 | 12,41  | ,104 |
|                       | 95% Intervalo de Confiança para | Limite inferior | 12,21  |      |

|                          |                                 |                 |        |        |
|--------------------------|---------------------------------|-----------------|--------|--------|
|                          | Média                           | Limite superior | 12,62  |        |
|                          | 5% da média aparada             |                 | 12,42  |        |
|                          | Mediana                         |                 | 12,00  |        |
|                          | Variância                       |                 | 14,244 |        |
|                          | Erro Desvio                     |                 | 3,774  |        |
|                          | Mínimo                          |                 | 4      |        |
|                          | Máximo                          |                 | 20     |        |
|                          | Intervalo                       |                 | 16     |        |
|                          | Amplitude interquartil          |                 | 5      |        |
|                          | Assimetria                      |                 | ,036   | ,068   |
|                          | Curtose                         |                 | -,613  | ,135   |
| OLBI Disengagement Score | Média                           |                 | 2,7740 | ,02317 |
|                          | 95% Intervalo de Confiança para | Limite inferior | 2,7285 |        |
|                          | Média                           | Limite superior | 2,8194 |        |
|                          | 5% da média aparada             |                 | 2,7632 |        |
|                          | Mediana                         |                 | 2,7500 |        |
|                          | Variância                       |                 | ,705   |        |
|                          | Erro Desvio                     |                 | ,83949 |        |
|                          | Mínimo                          |                 | 1,00   |        |
|                          | Máximo                          |                 | 5,00   |        |
|                          | Intervalo                       |                 | 4,00   |        |
|                          | Amplitude interquartil          |                 | 1,25   |        |
|                          | Assimetria                      |                 | ,186   | ,068   |
|                          | Curtose                         |                 | -,428  | ,135   |
| OLBI Exhaustion Score    | Média                           |                 | 3,5546 | ,02032 |
|                          | 95% Intervalo de Confiança para | Limite inferior | 3,5147 |        |
|                          | Média                           | Limite superior | 3,5945 |        |
|                          | 5% da média aparada             |                 | 3,5786 |        |
|                          | Mediana                         |                 | 3,6300 |        |
|                          | Variância                       |                 | ,542   |        |
|                          | Erro Desvio                     |                 | ,73625 |        |
|                          | Mínimo                          |                 | 1,00   |        |
|                          | Máximo                          |                 | 5,00   |        |
|                          | Intervalo                       |                 | 4,00   |        |
|                          | Amplitude interquartil          |                 | ,87    |        |
|                          | Assimetria                      |                 | -,525  | ,068   |
|                          | Curtose                         |                 | ,223   | ,135   |
| OLBI Total Score         | Média                           |                 | 3,1644 | ,01931 |
|                          | 95% Intervalo de Confiança para | Limite inferior | 3,1265 |        |
|                          | Média                           | Limite superior | 3,2022 |        |
|                          | 5% da média aparada             |                 | 3,1721 |        |
|                          | Mediana                         |                 | 3,1900 |        |
|                          | Variância                       |                 | ,490   |        |
|                          | Erro Desvio                     |                 | ,69979 |        |
|                          | Mínimo                          |                 | 1,00   |        |
|                          | Máximo                          |                 | 5,00   |        |

|                        |       |      |
|------------------------|-------|------|
| Intervalo              | 4,00  |      |
| Amplitude interquartil | ,94   |      |
| Assimetria             | -,135 | ,068 |
| Curtose                | -,231 | ,135 |

| Testes de Normalidade    |                                 |      |      |              |      |      |
|--------------------------|---------------------------------|------|------|--------------|------|------|
|                          | Kolmogorov-Smirnov <sup>a</sup> |      |      | Shapiro-Wilk |      |      |
|                          | Estatística                     | df   | Sig. | Estatística  | df   | Sig. |
| DASS21 Depression Score  | ,109                            | 1313 | ,000 | ,939         | 1313 | ,000 |
| DASS21 Anxiety Score     | ,122                            | 1313 | ,000 | ,917         | 1313 | ,000 |
| DASS21 Stress Score      | ,075                            | 1313 | ,000 | ,979         | 1313 | ,000 |
| PHQ9 Depression Score    | ,070                            | 1313 | ,000 | ,981         | 1313 | ,000 |
| BRCS Score               | ,065                            | 1313 | ,000 | ,983         | 1313 | ,000 |
| OLBI Disengagement Score | ,056                            | 1313 | ,000 | ,990         | 1313 | ,000 |
| OLBI Exhaustion Score    | ,067                            | 1313 | ,000 | ,980         | 1313 | ,000 |
| OLBI Total Score         | ,026                            | 1313 | ,032 | ,996         | 1313 | ,003 |

a. Correlação de Significância de Lilliefors

DASS21 Depression Score

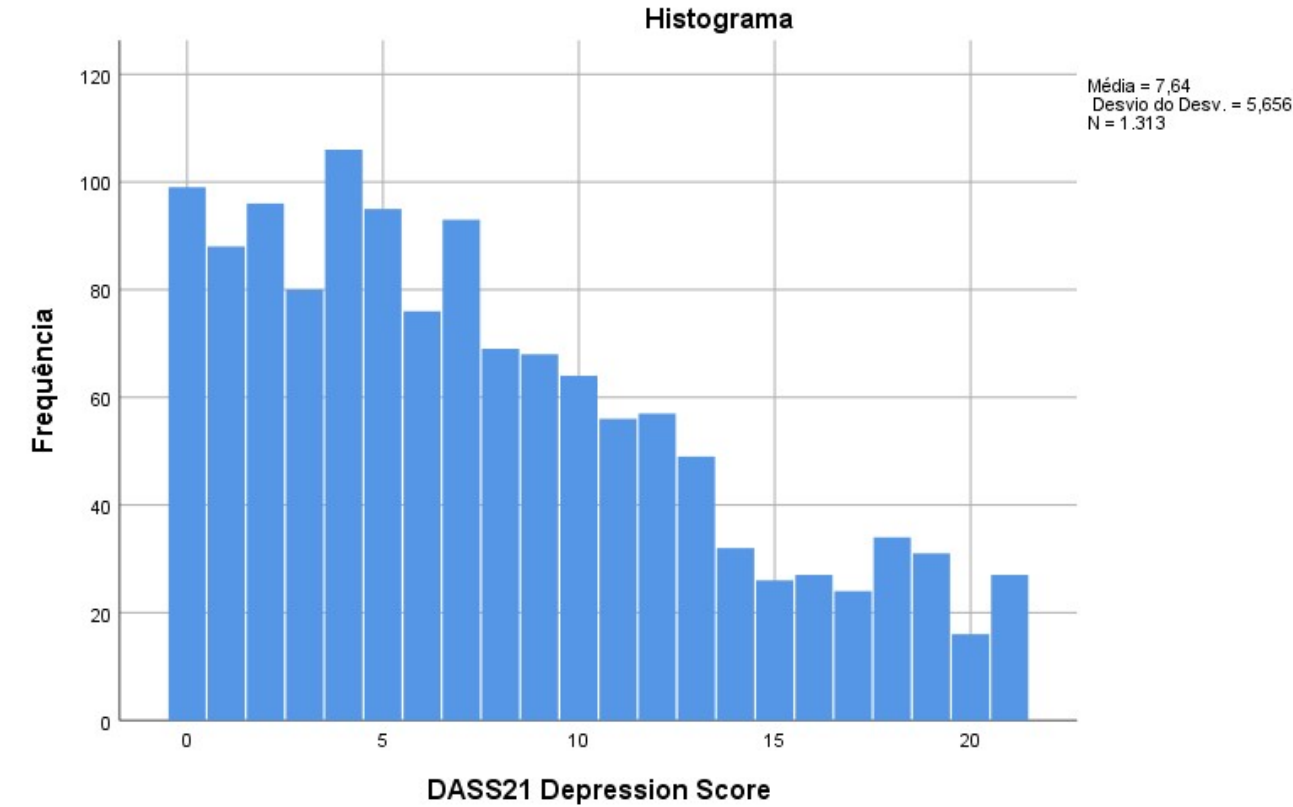

Gráfico Q-Q Normal de DASS21 Depression Score

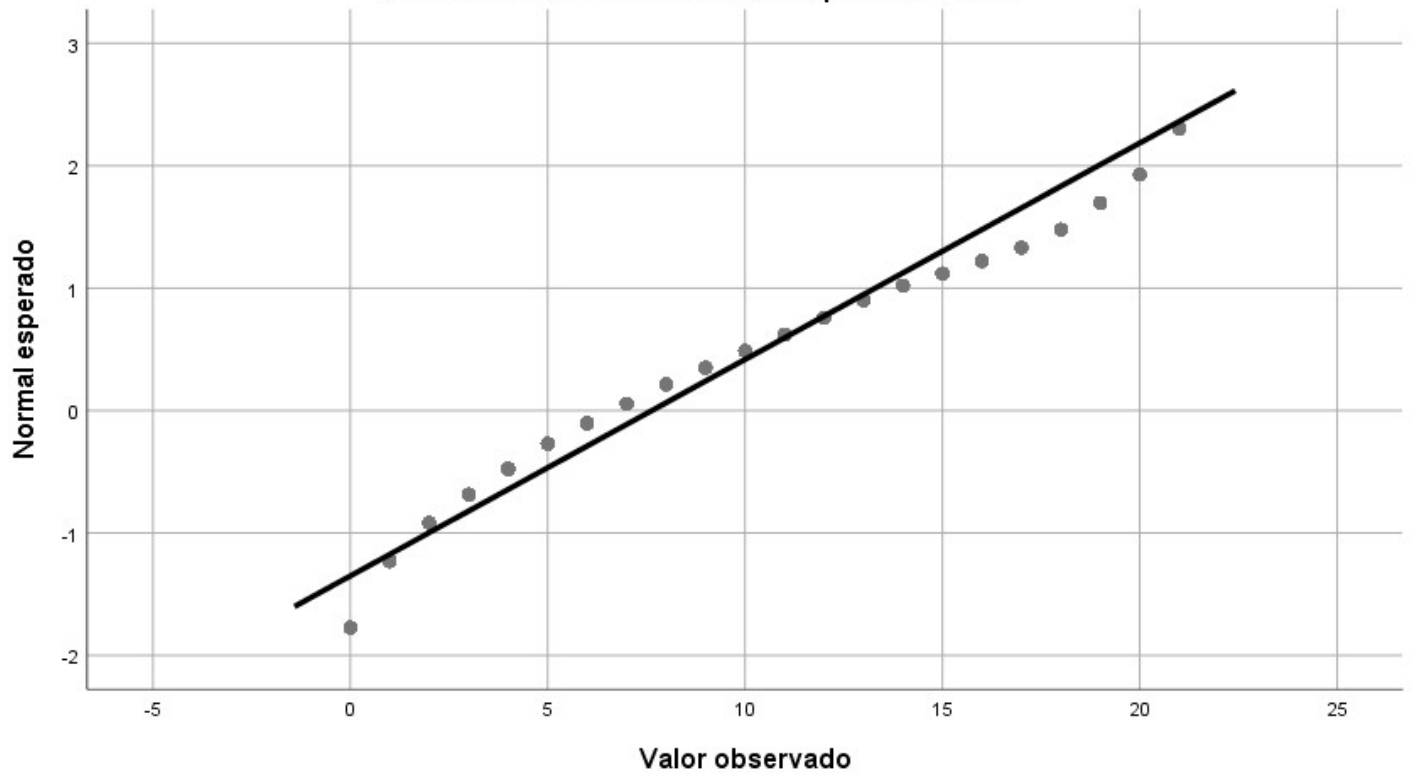

Gráfico Q-Q Normal sem Tendência de DASS21 Depression Score

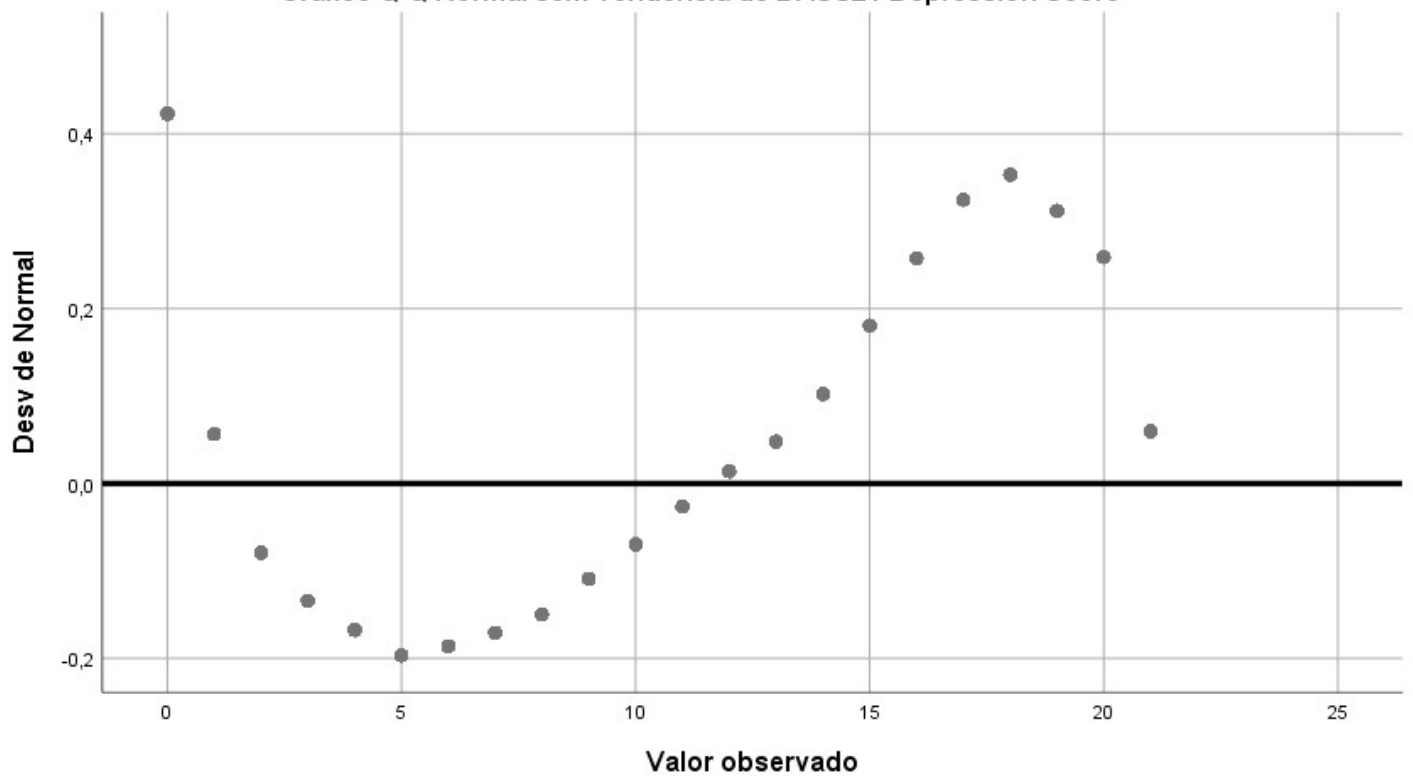

Histograma

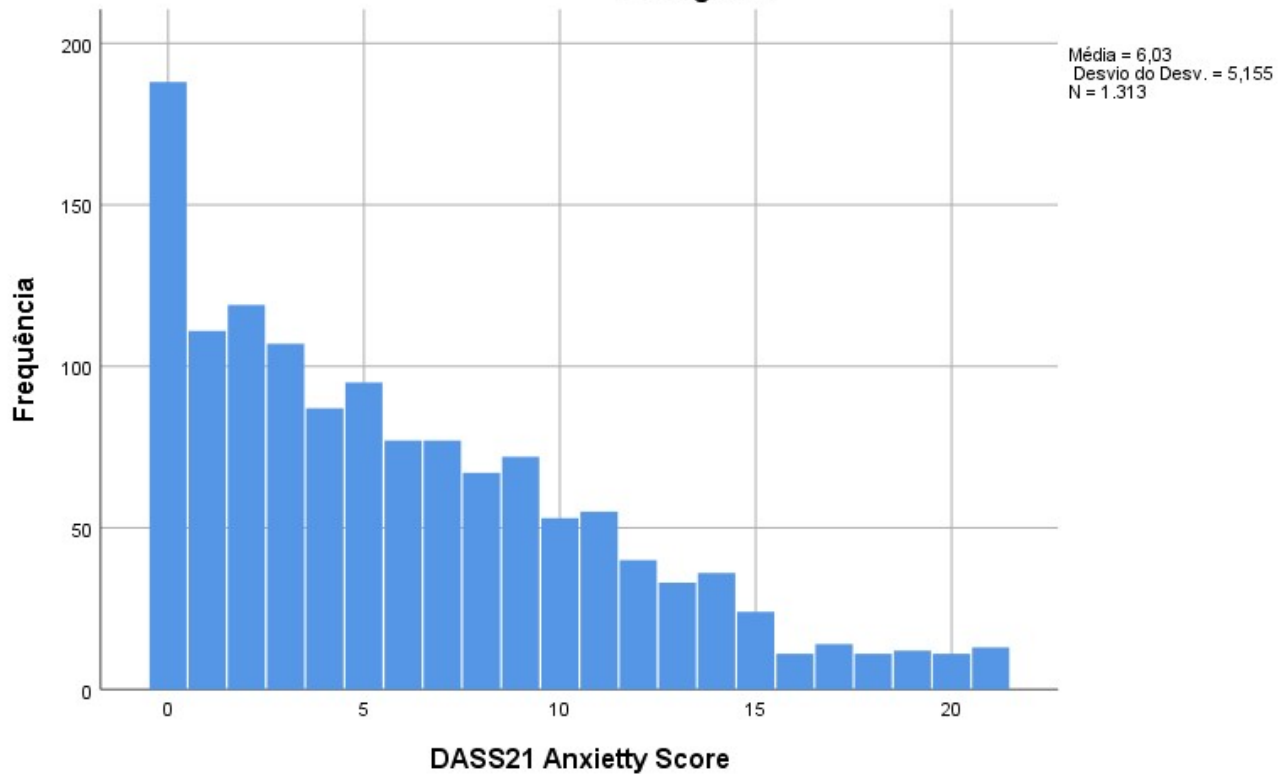

Gráfico Q-Q Normal de DASS21 Anxiety Score

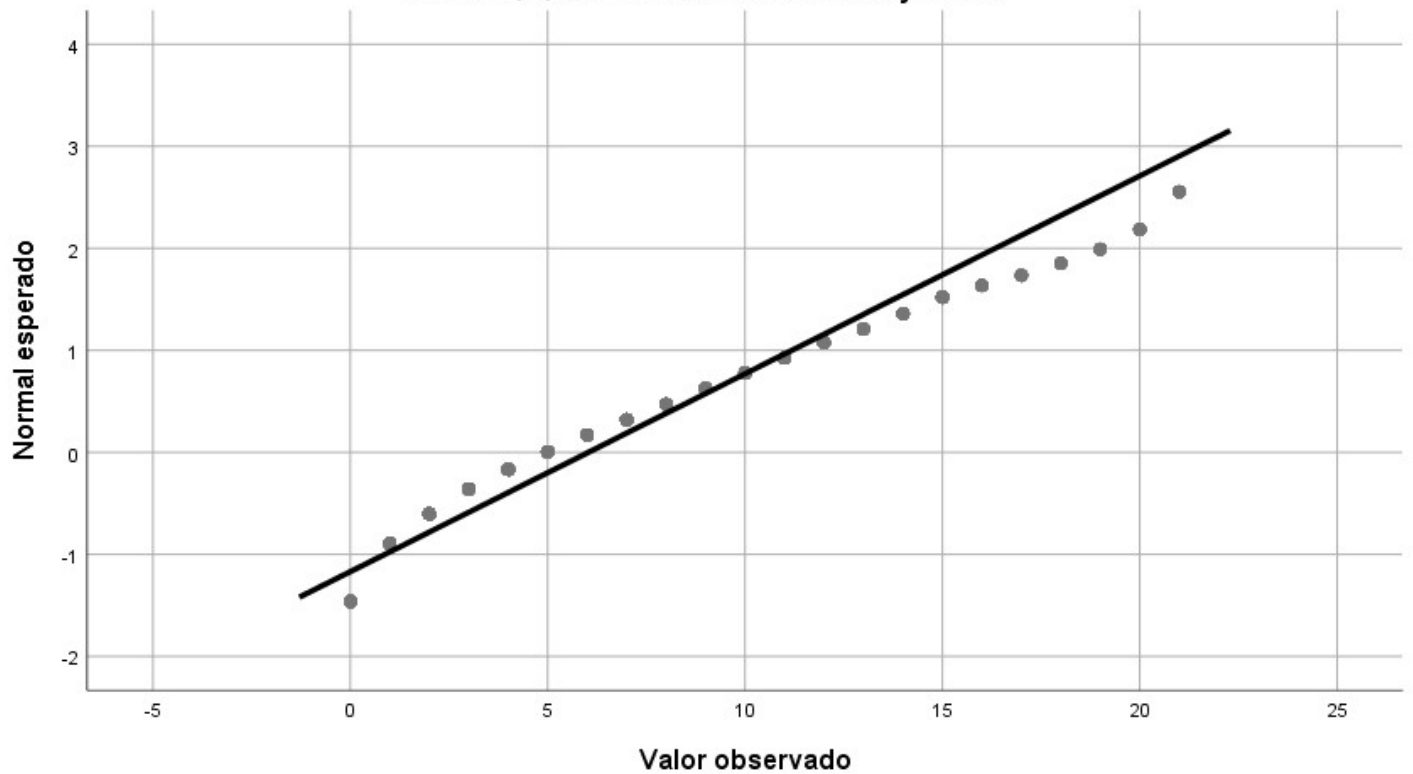

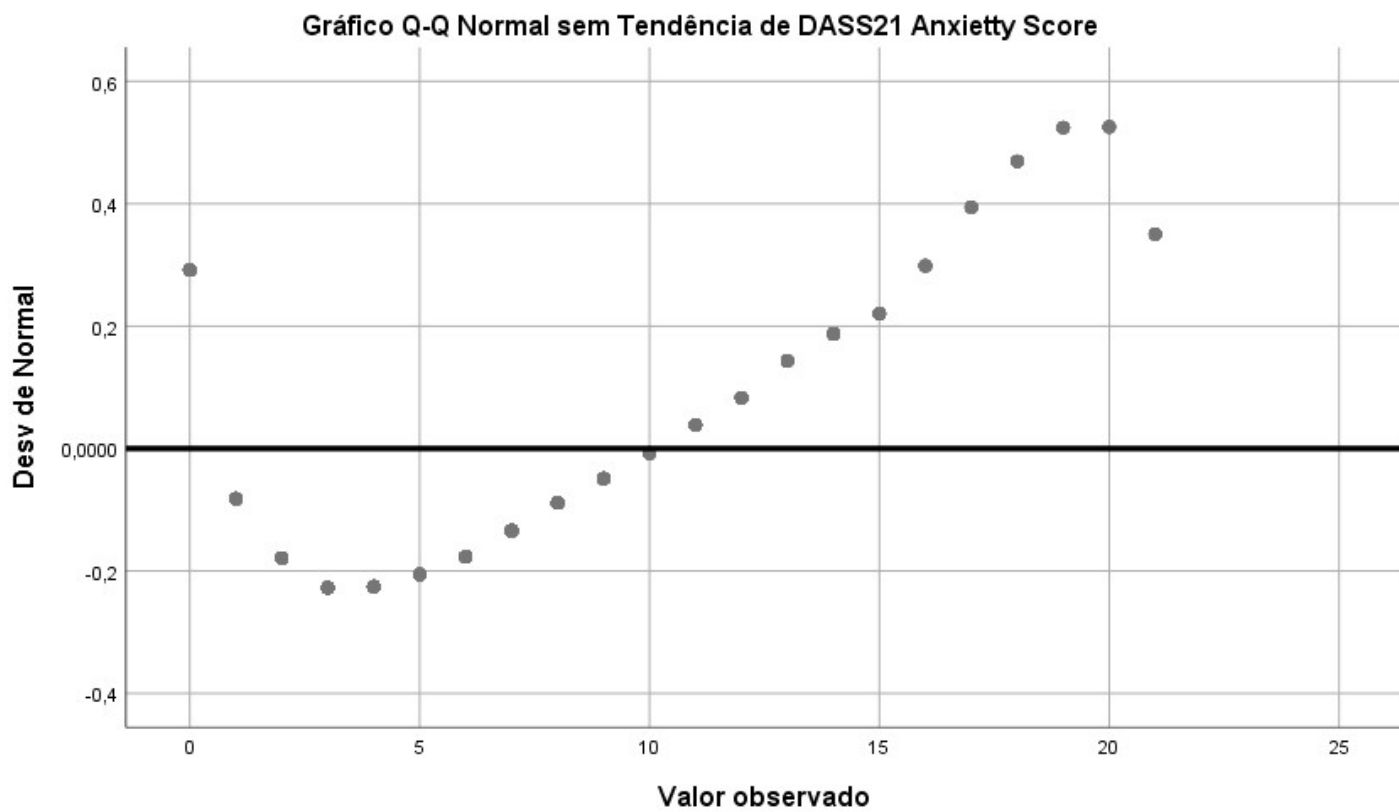

DASS21 Stress Score

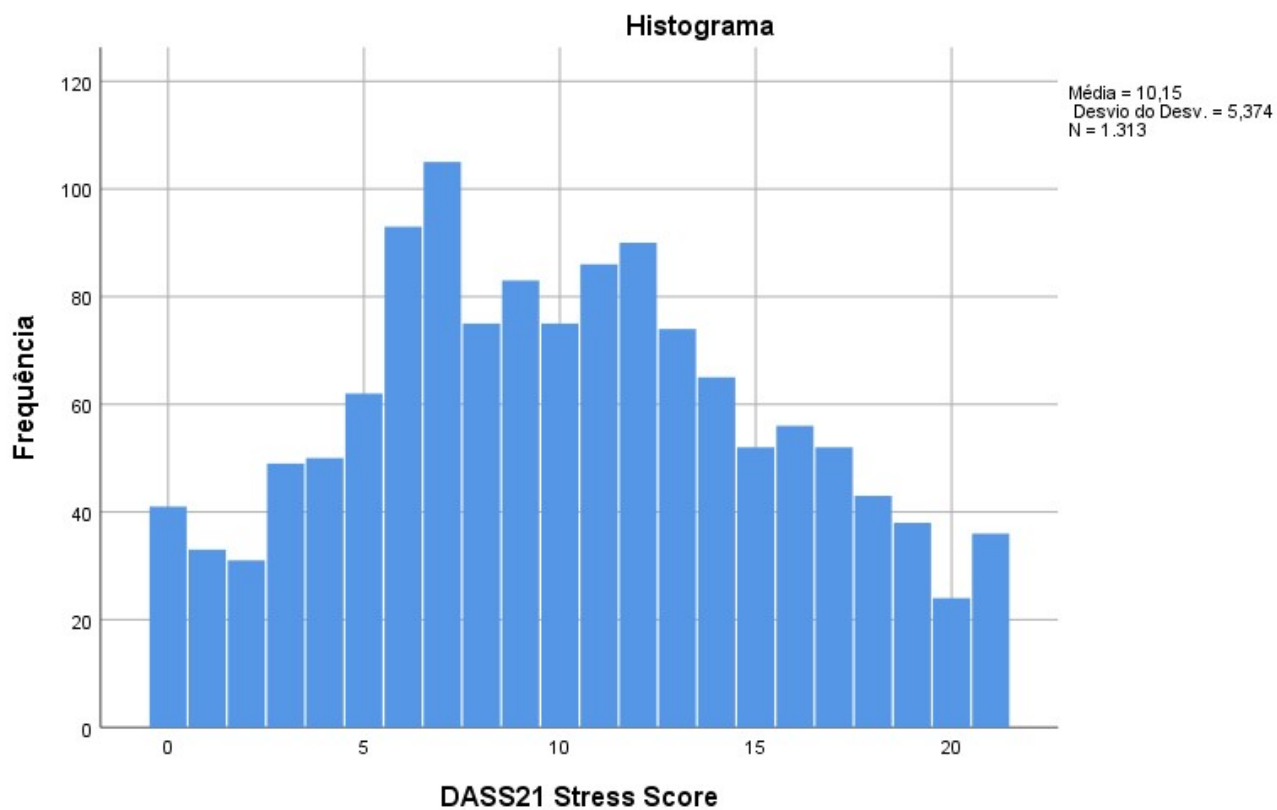

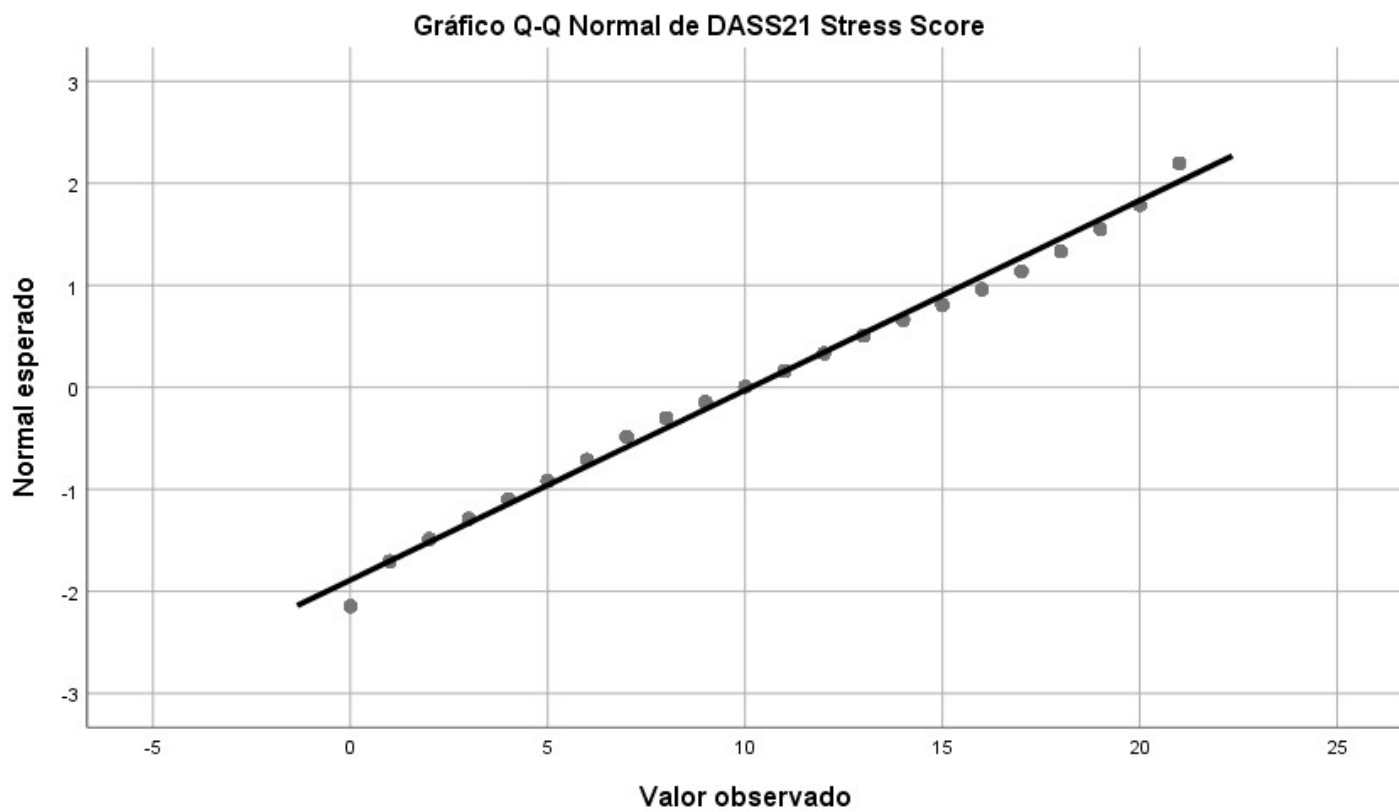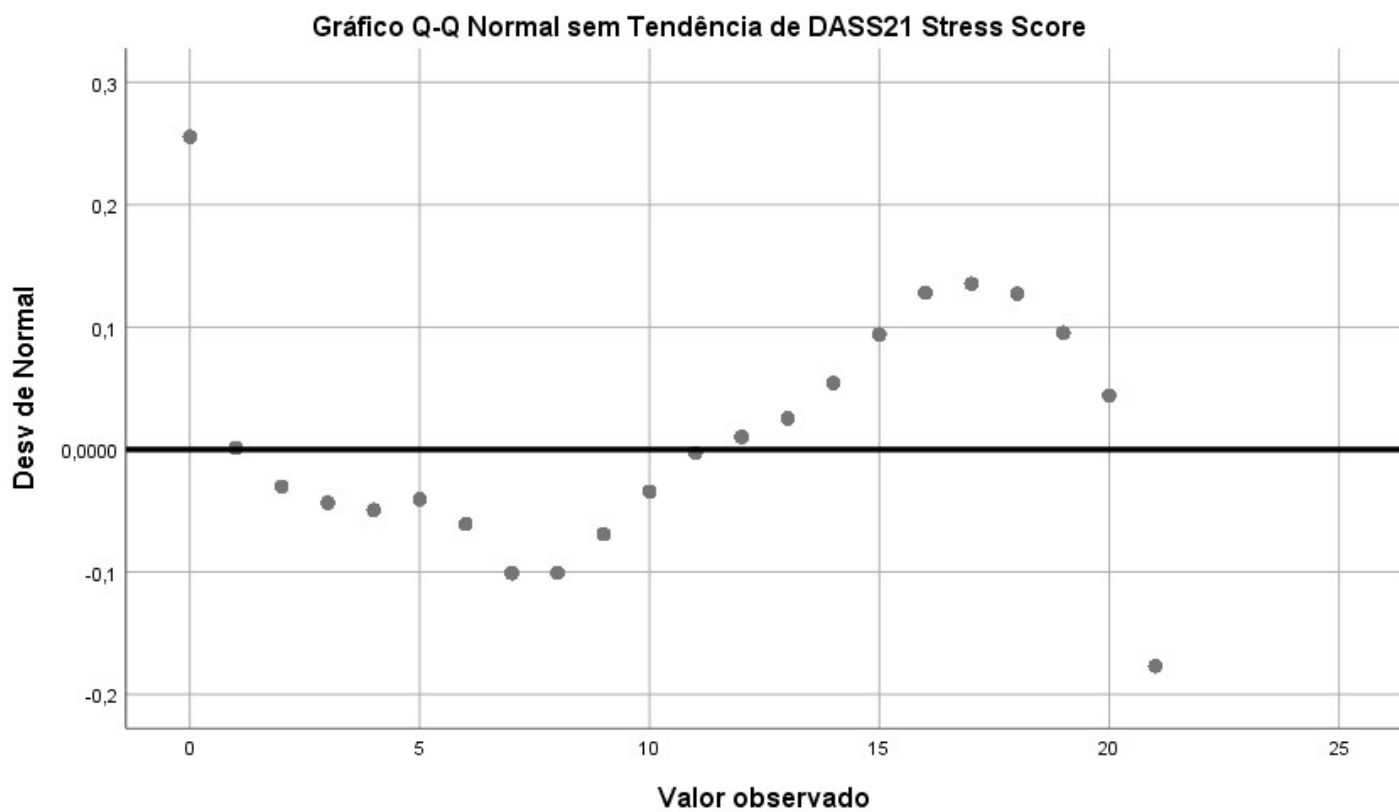

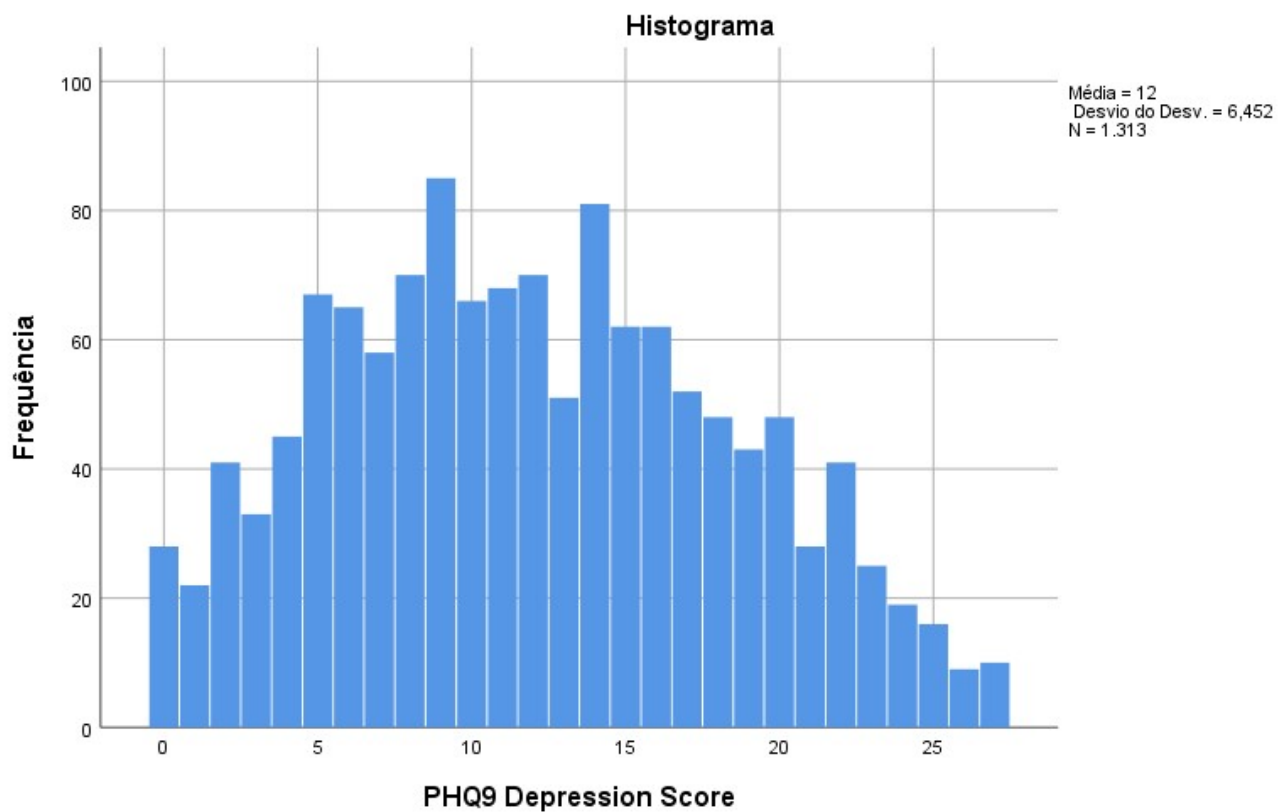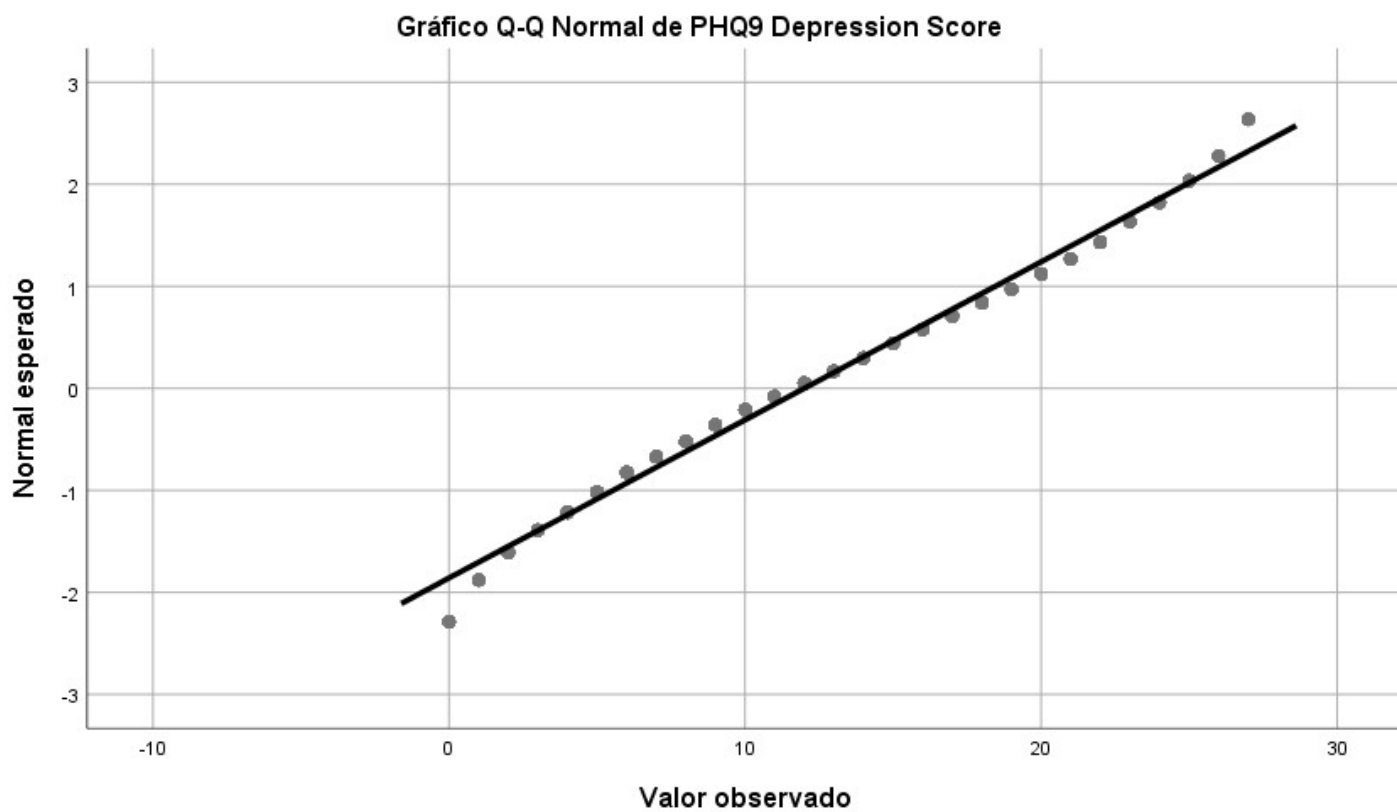

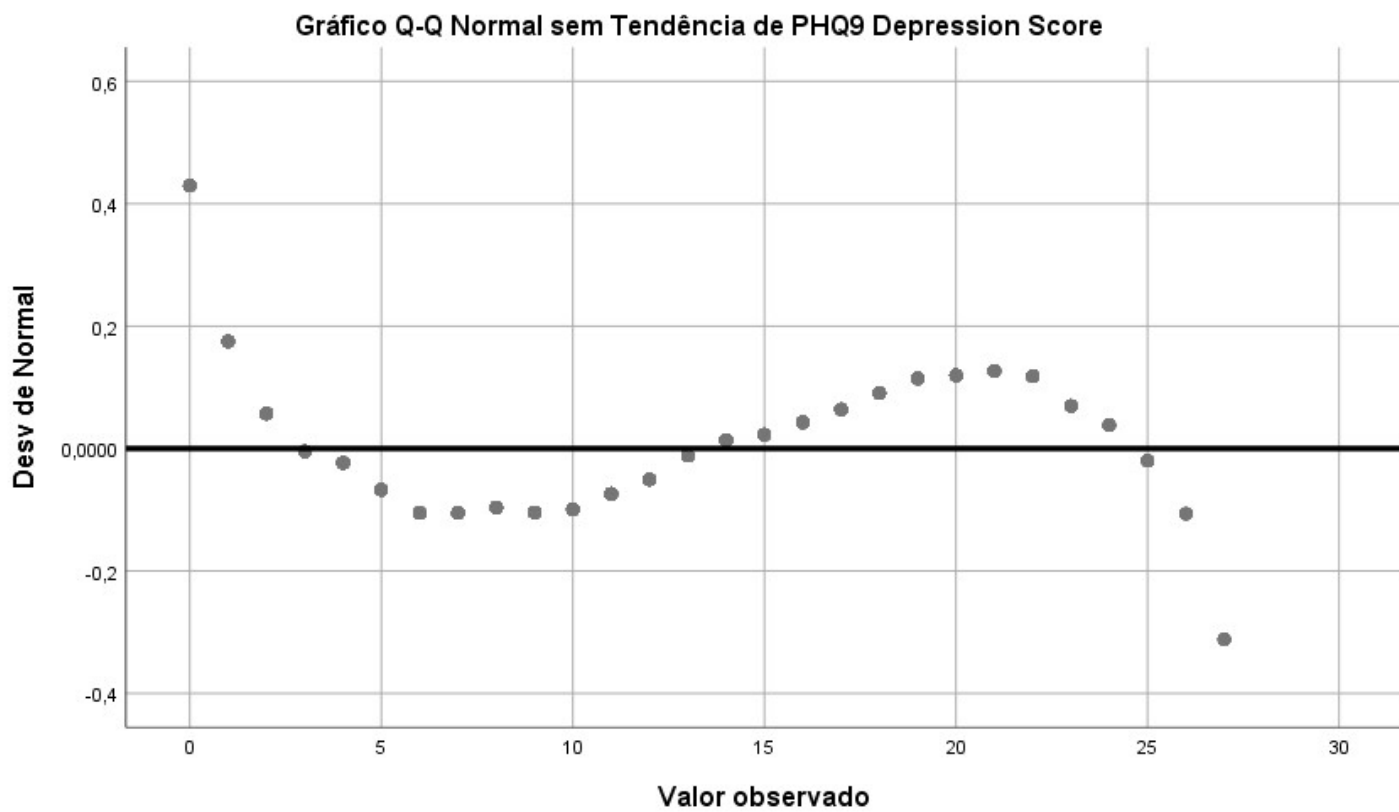

BRCS Score

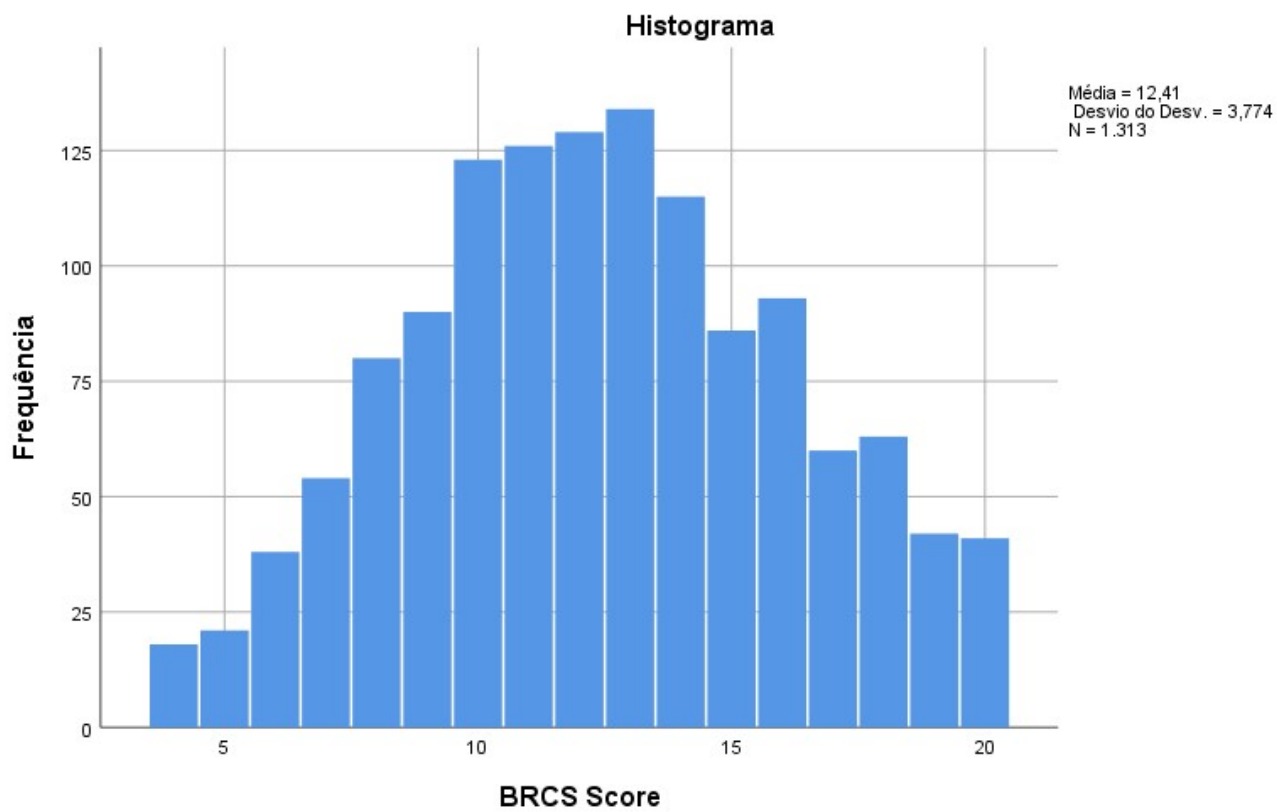

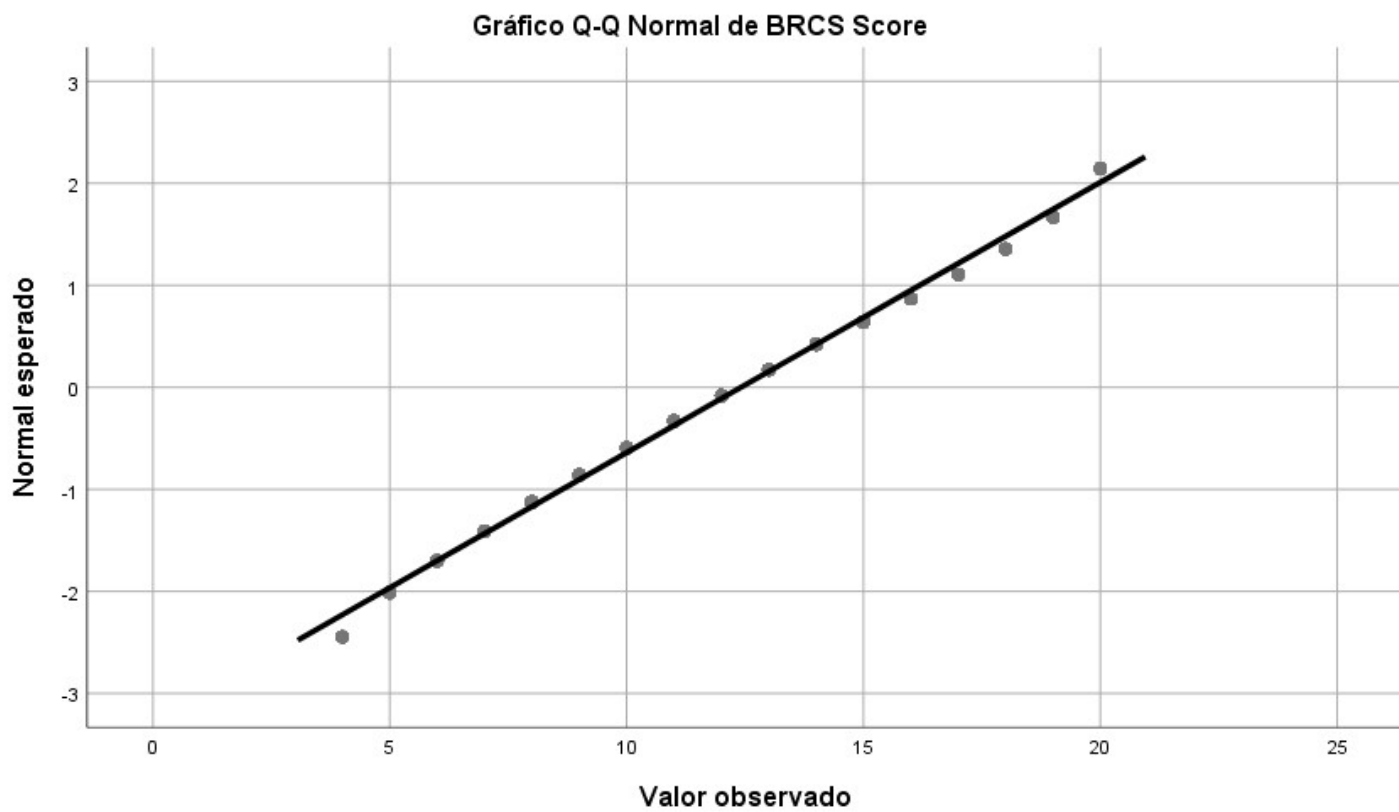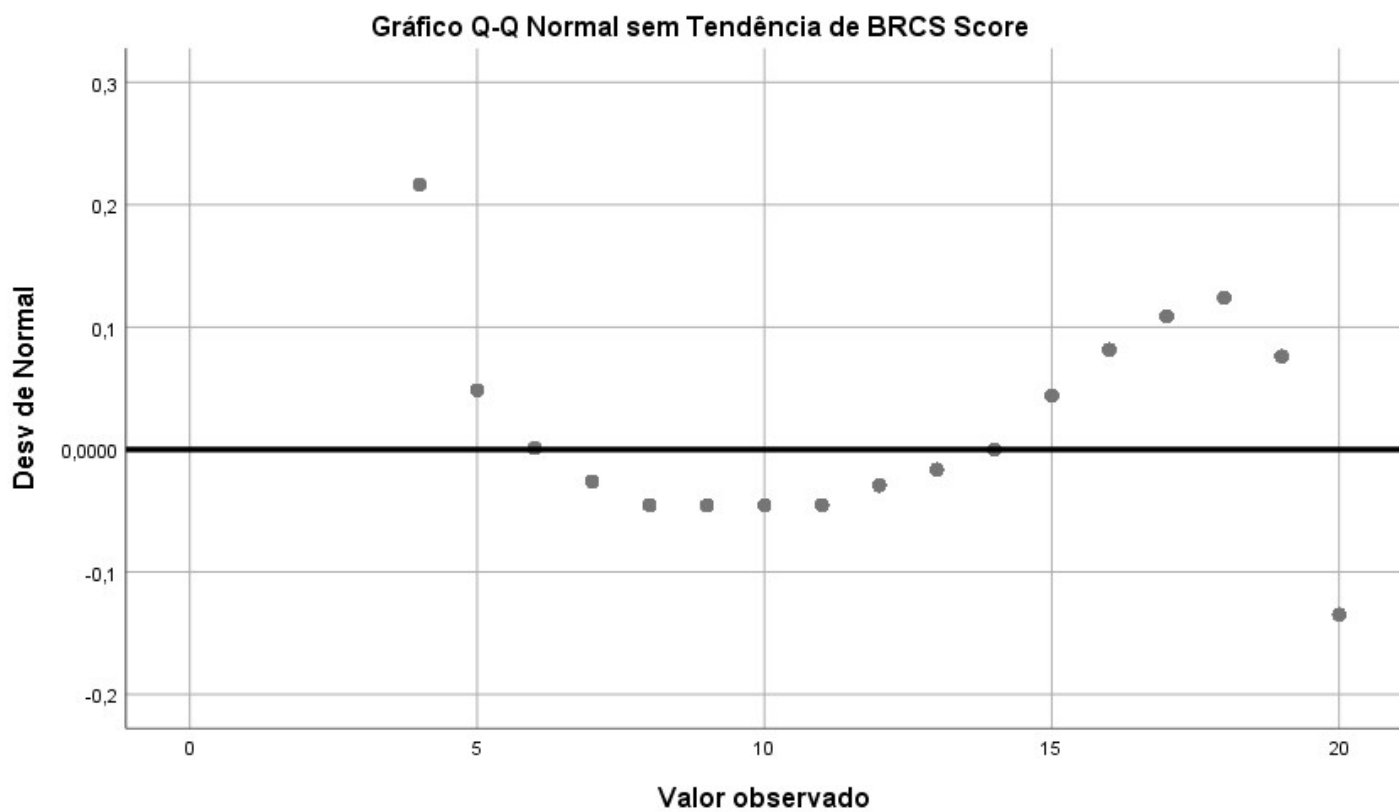

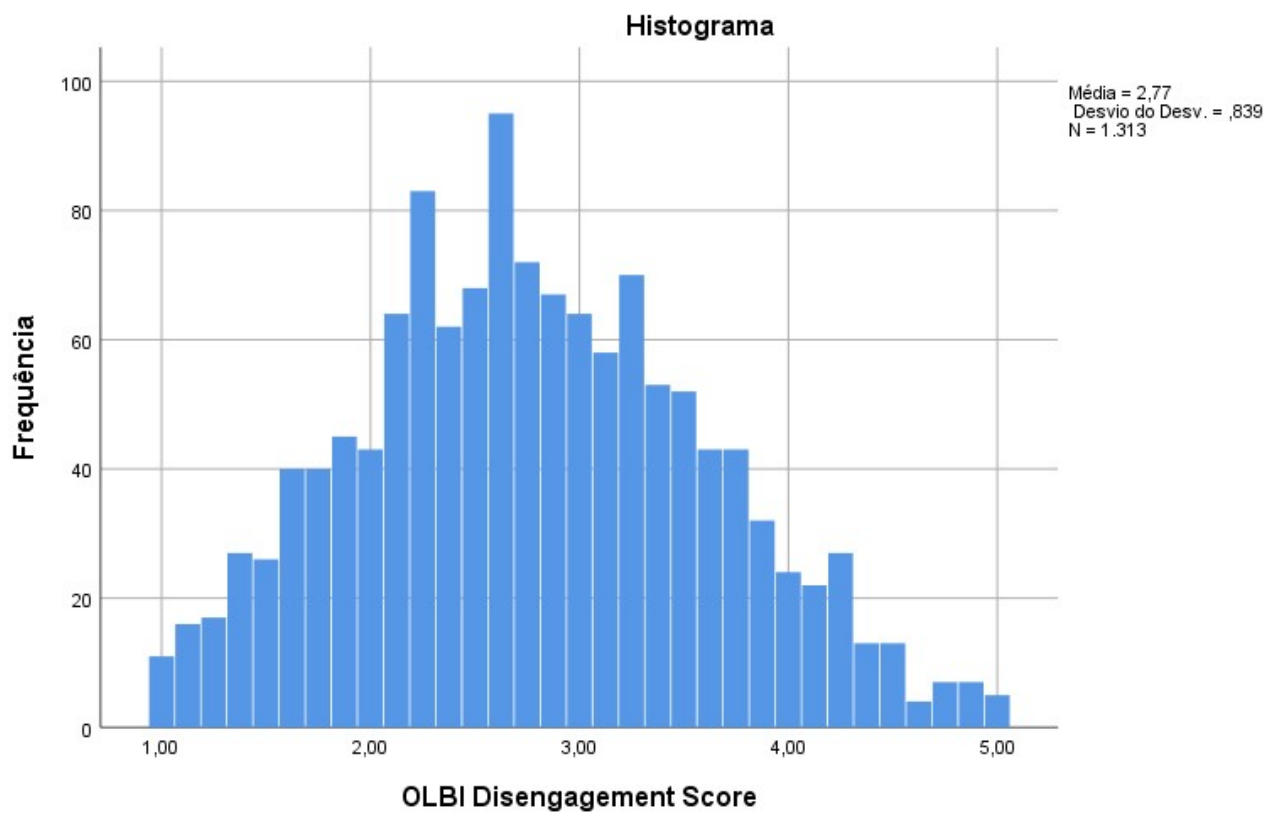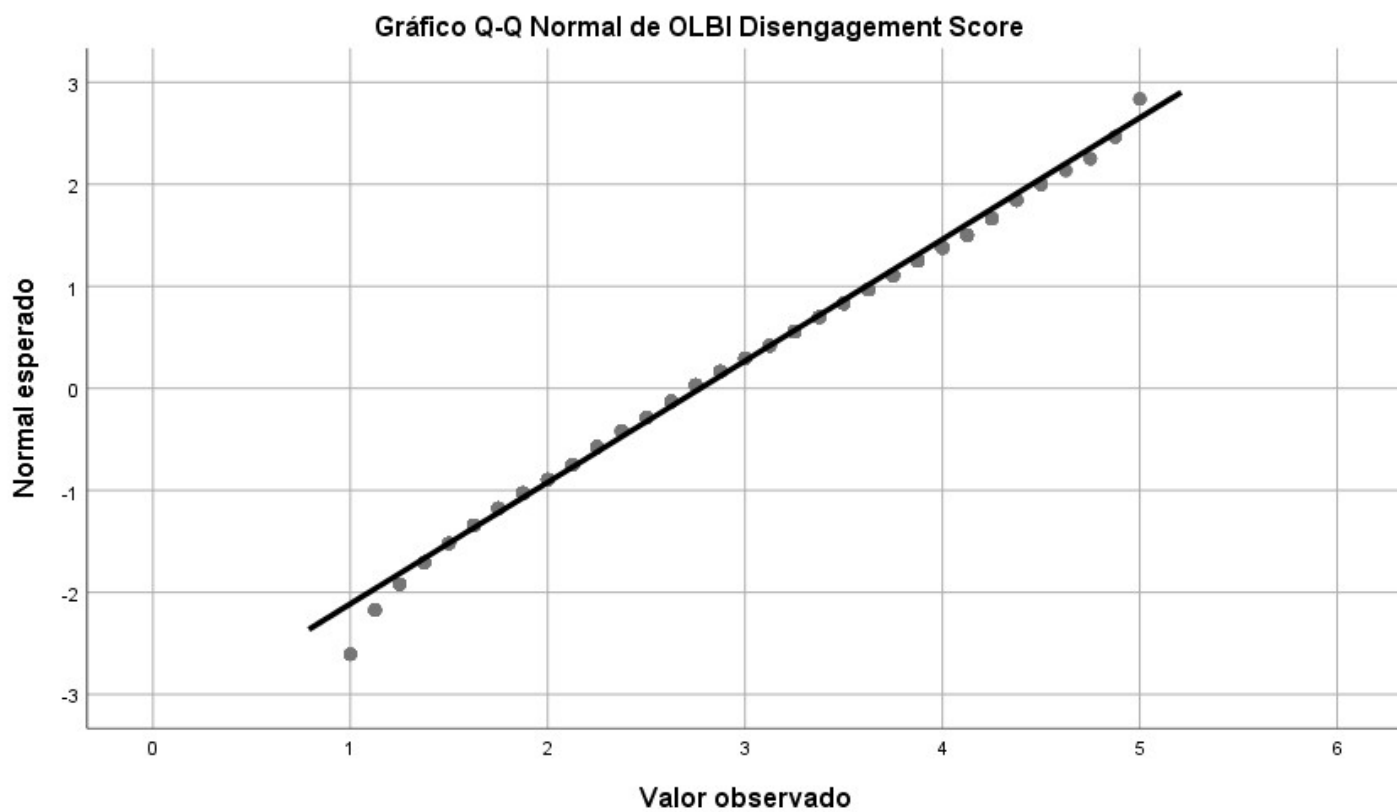

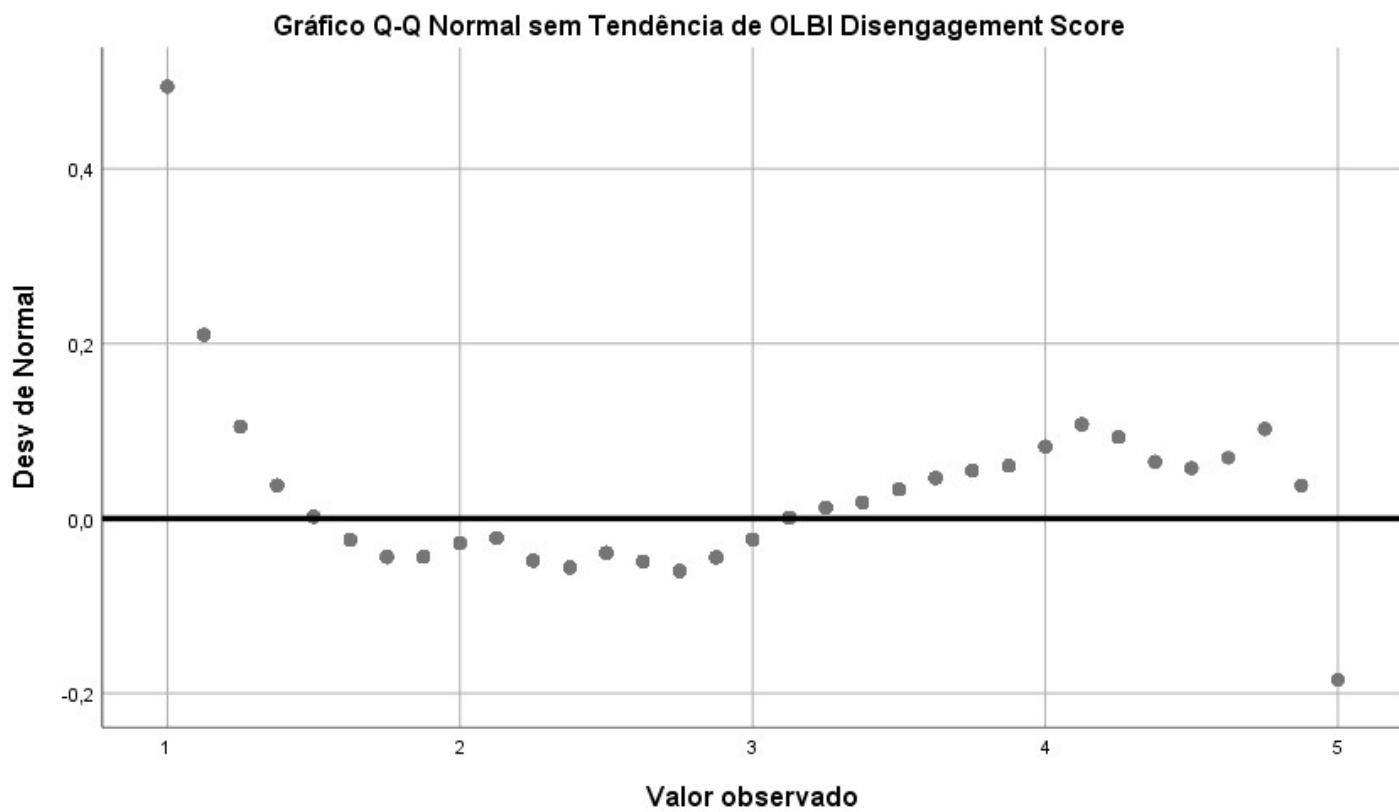

OLBI Exhaustion Score

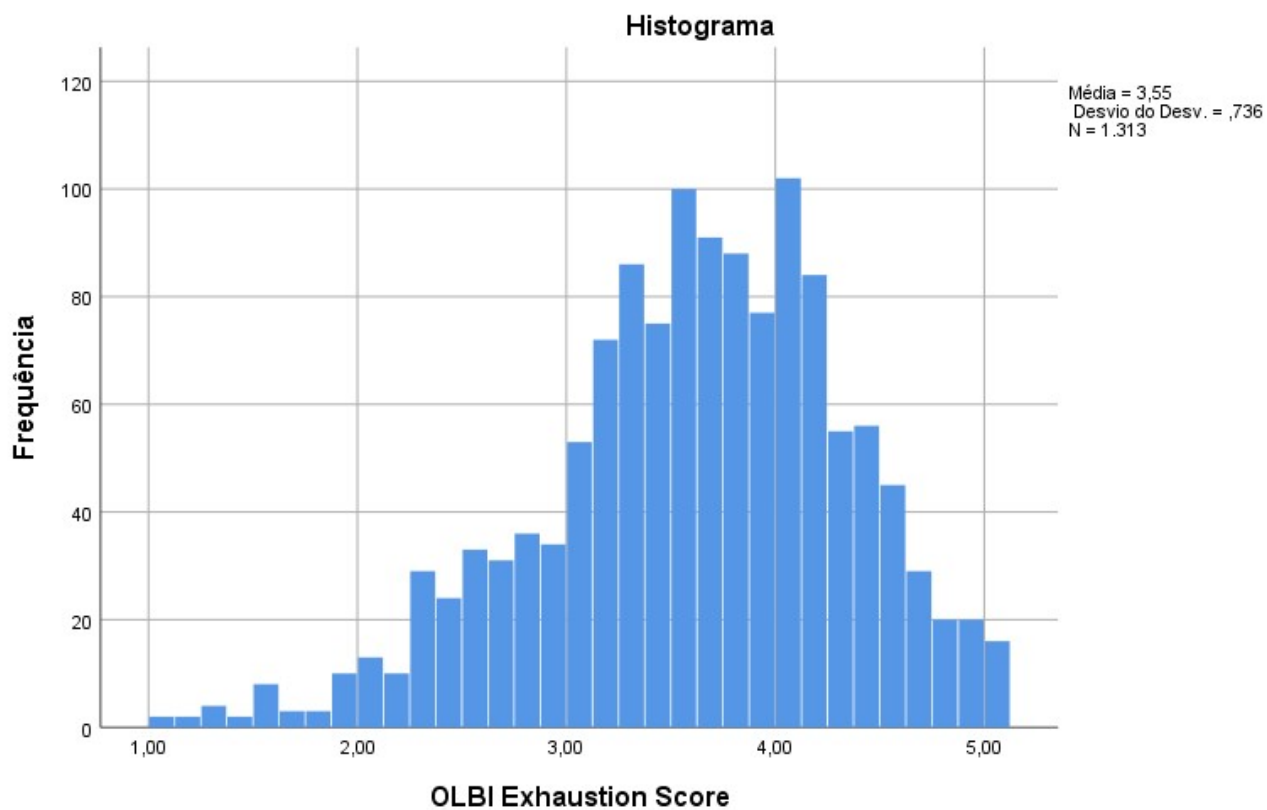

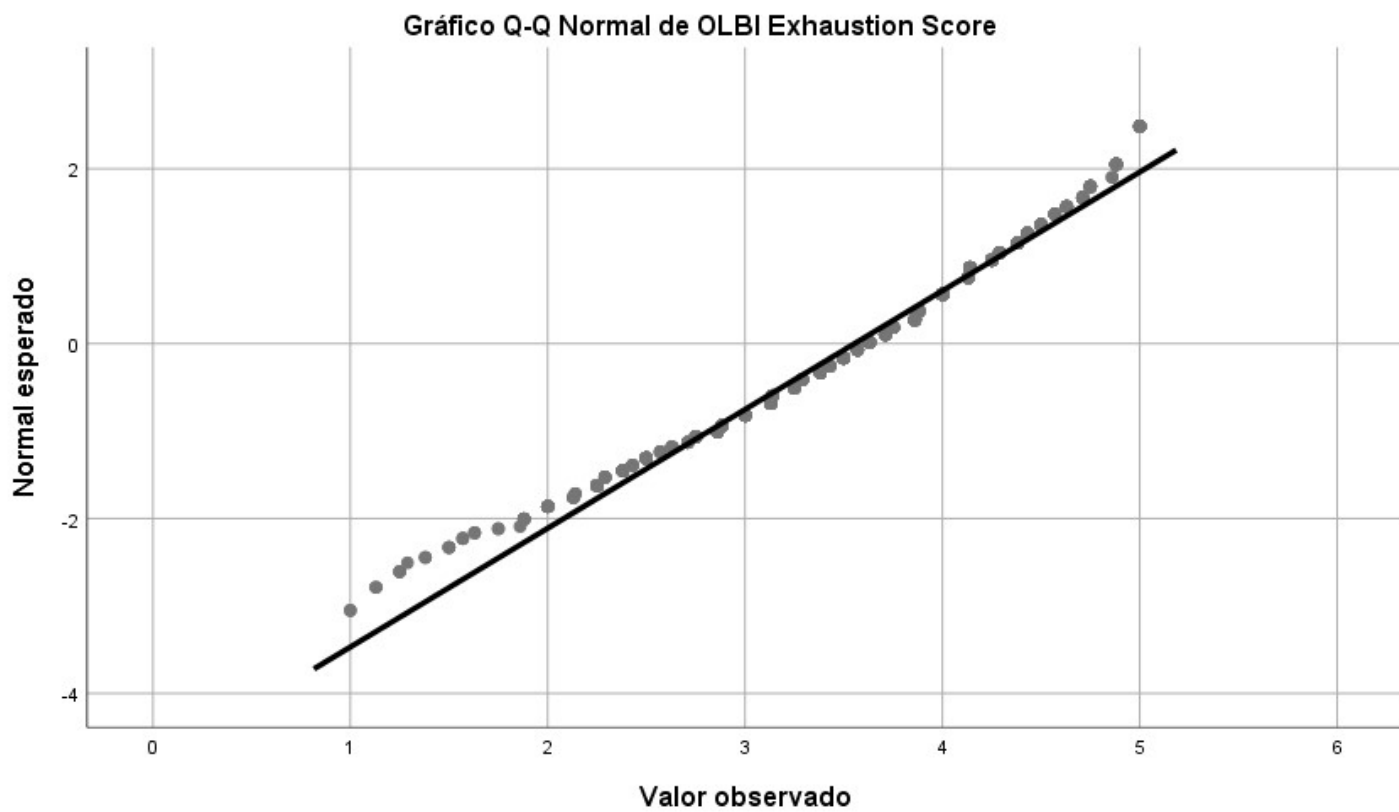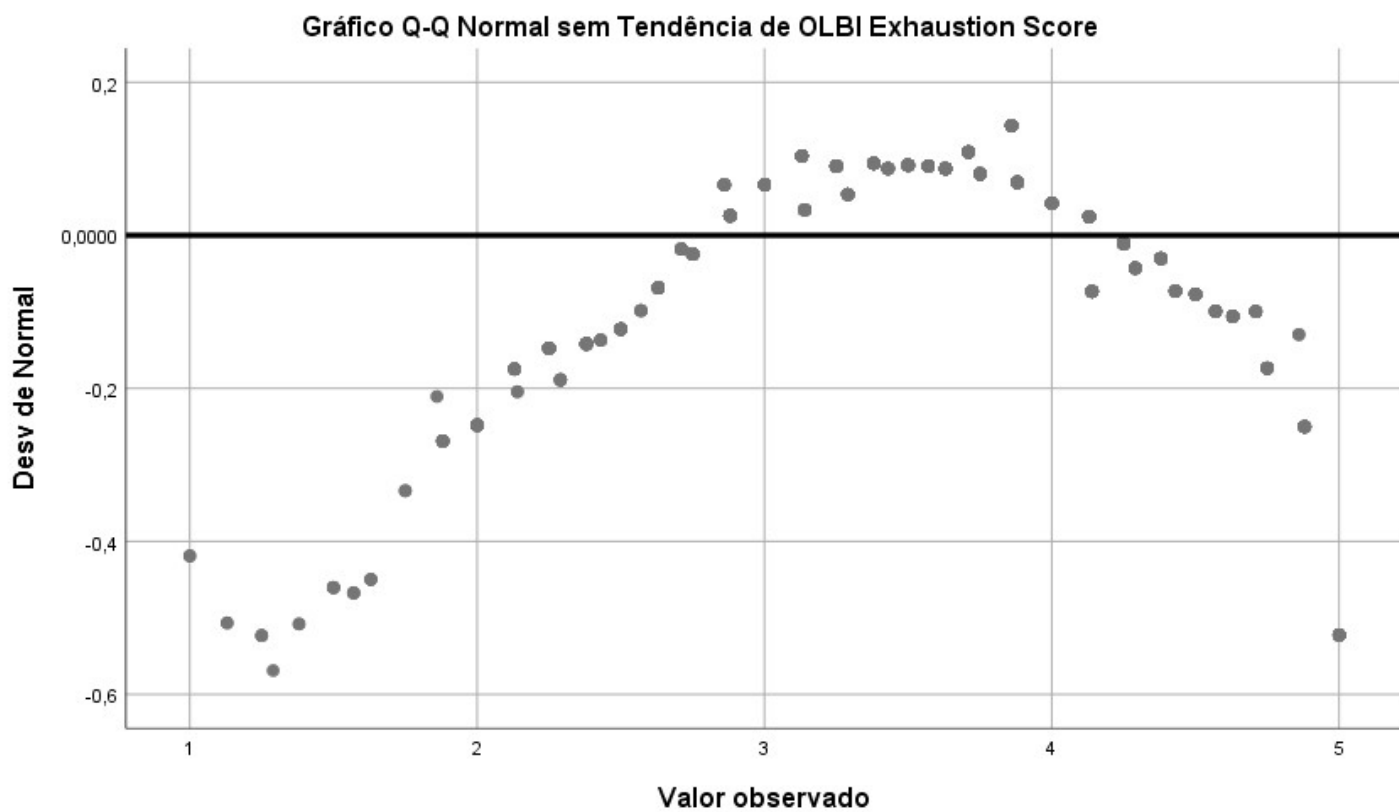

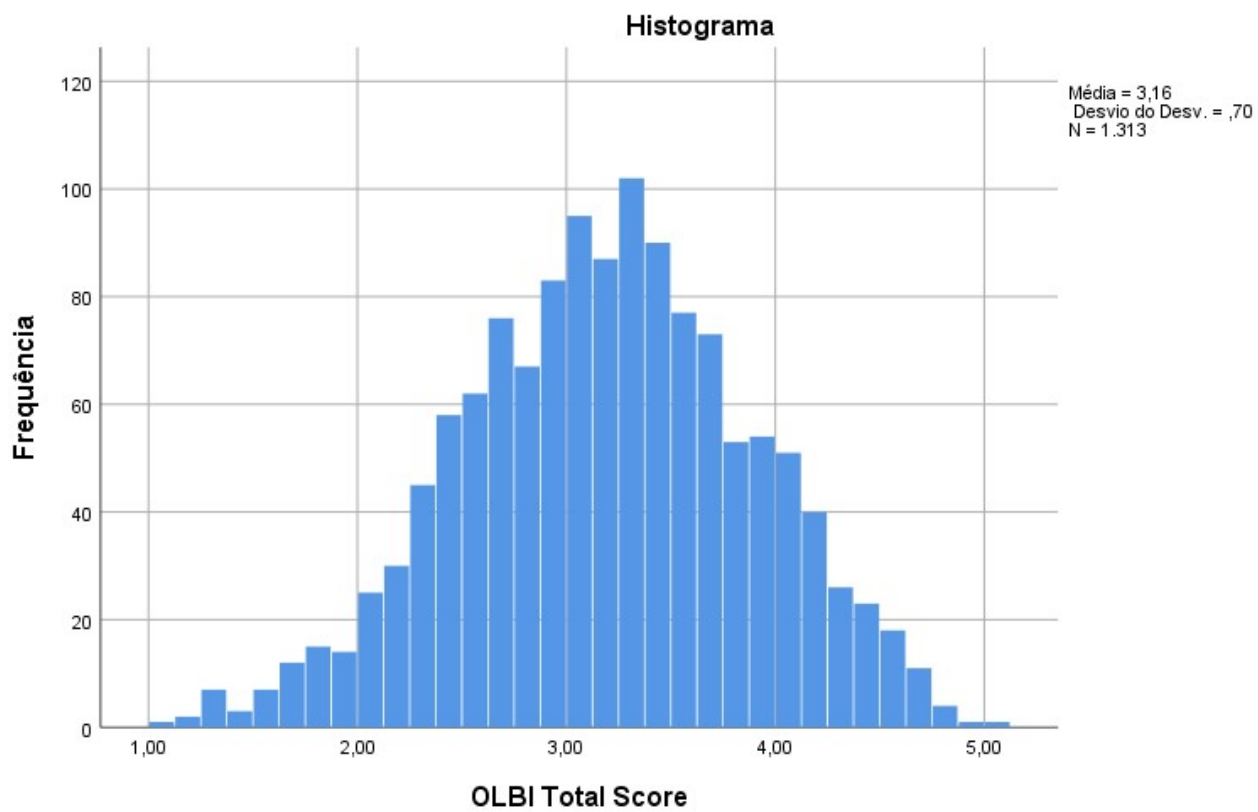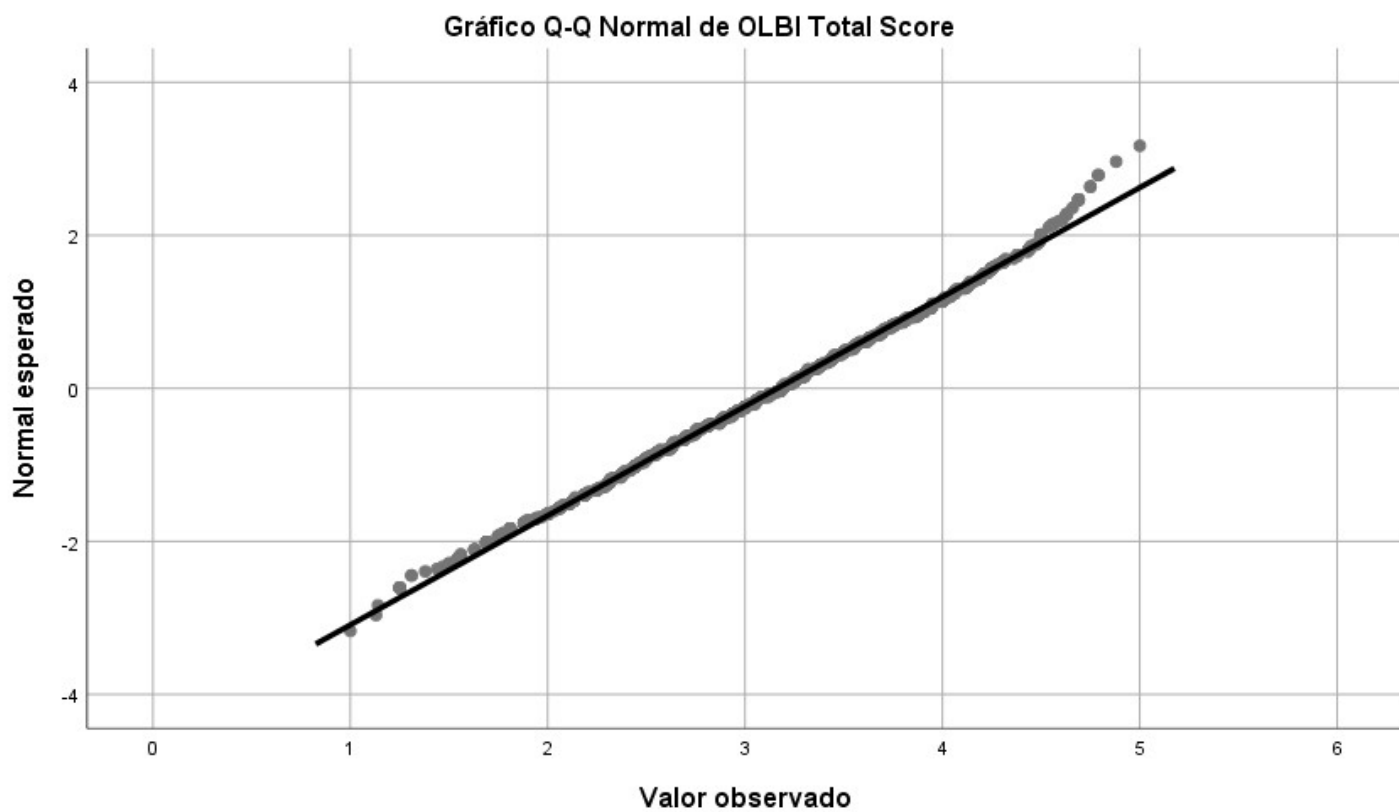

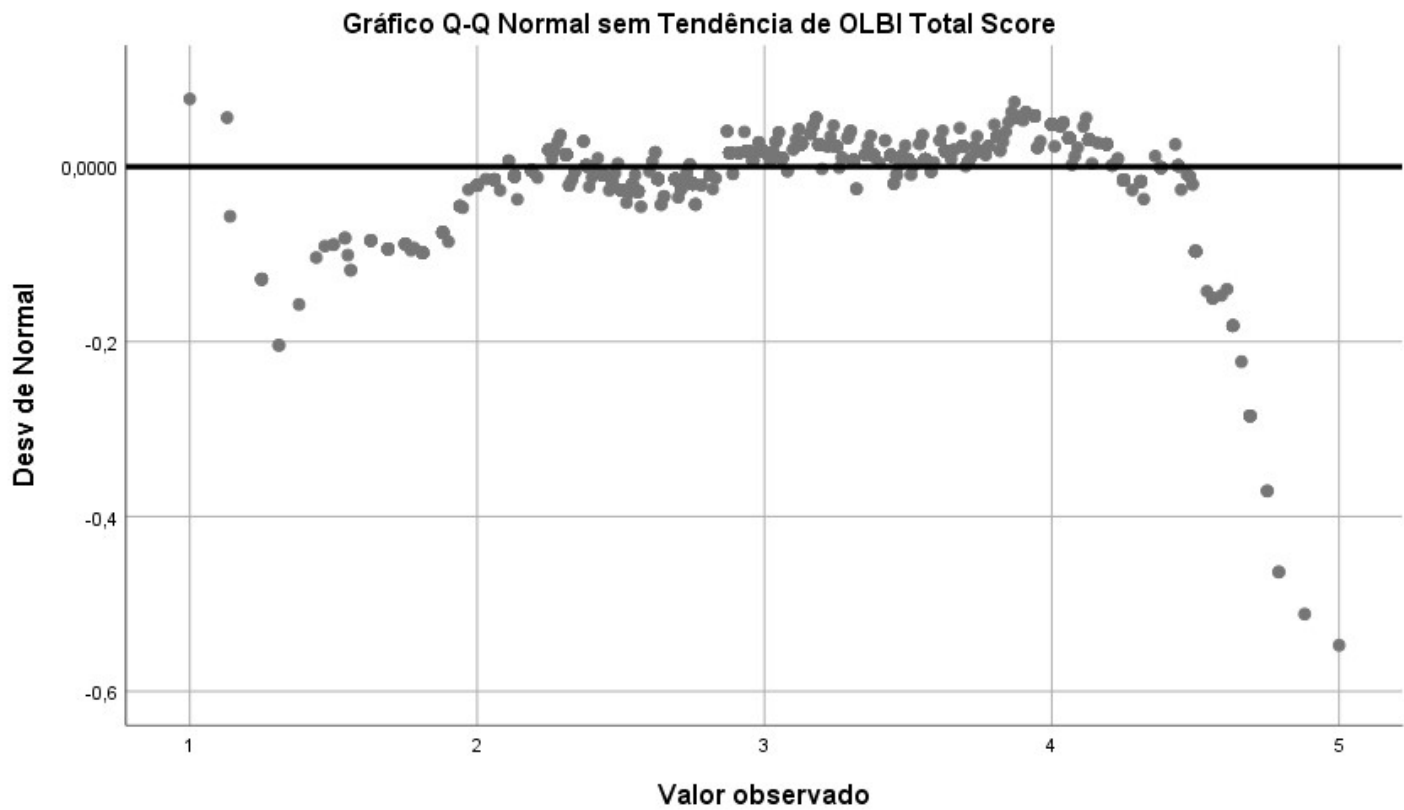

```

FREQUENCIES VARIABLES=DASS21_Classif_D5c DASS21_Classif_A5c DASS21_Classif_S5c DASS21_Classif_D2c
  DASS21_Classif_A2c DASS21_Classif_S2c PHQ9_Classif BRCS_Classif OLBI_Classif_2c
/BARCHART PERCENT
/ORDER=VARIABLE.

```

Frequências

### Observações

|                            |                                             |                                                                      |
|----------------------------|---------------------------------------------|----------------------------------------------------------------------|
| Saída criada               |                                             | 20-SEP-2020 11:25:30                                                 |
| Comentários                |                                             |                                                                      |
| Entrada                    | Dados                                       | C:\Users\User\Documents\Pesquisa\Fellow\FellowGenData_V1.sav         |
|                            | Conjunto de dados ativo                     | ConjuntodeDados1                                                     |
|                            | Filtro                                      | <none>                                                               |
|                            | Ponderação                                  | <none>                                                               |
|                            | Arquivo Dividido                            | <none>                                                               |
|                            | N de linhas em arquivo de dados de trabalho | 1313                                                                 |
|                            |                                             |                                                                      |
| Tratamento de valor omisso | Definição de omisso                         | Os valores omissos definidos pelo usuário são tratados como omissos. |
|                            | Casos utilizados                            | As estatísticas estão baseadas em todos os casos com dados válidos.  |

|          |                      |                                                                                                                                                                                                                                                     |
|----------|----------------------|-----------------------------------------------------------------------------------------------------------------------------------------------------------------------------------------------------------------------------------------------------|
| Sintaxe  |                      | FREQUENCIES<br>VARIABLES=DASS21_Classif_D5<br>c DASS21_Classif_A5c<br>DASS21_Classif_S5c<br>DASS21_Classif_D2c<br>DASS21_Classif_A2c<br>DASS21_Classif_S2c<br>PHQ9_Classif BRCS_Classif<br>OLBI_Classif_2c<br>/BARCHART PERCENT<br>/ORDER=VARIABLE. |
| Recursos | Tempo do processador | 00:00:01,44                                                                                                                                                                                                                                         |
|          | Tempo decorrido      | 00:00:01,45                                                                                                                                                                                                                                         |

DASS21 Classification - Depression

Estatísticas

DASS21 Classification - Depression

|   |        |      |
|---|--------|------|
| N | Válido | 1313 |
|   | Omisso | 0    |

DASS21 Classification - Depression

|        |          | Frequência | Porcentagem | Porcentagem válida | Porcentagem acumulativa |
|--------|----------|------------|-------------|--------------------|-------------------------|
| Válido | Normal   | 870        | 66,3        | 66,3               | 66,3                    |
|        | Minimal  | 226        | 17,2        | 17,2               | 83,5                    |
|        | Moderate | 190        | 14,5        | 14,5               | 97,9                    |
|        | High     | 27         | 2,1         | 2,1                | 100,0                   |
|        | Total    | 1313       | 100,0       | 100,0              |                         |

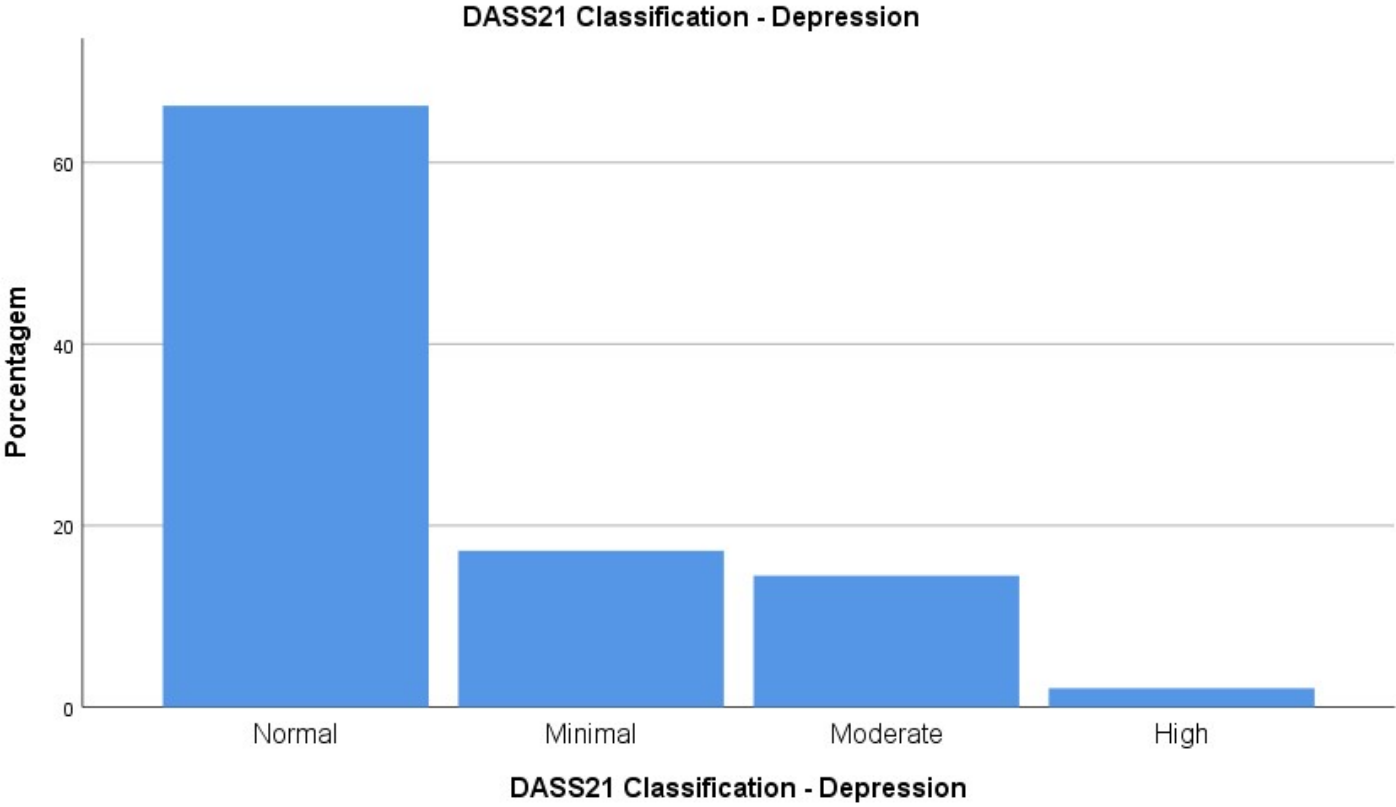

DASS21 Classification - Anxiety

Estadísticas

DASS21 Classification - Anxiety

|   |        |      |
|---|--------|------|
| N | Válido | 1313 |
|   | Omisso | 0    |

| DASS21 Classification - Anxiety |           |            |             |                    |                         |
|---------------------------------|-----------|------------|-------------|--------------------|-------------------------|
|                                 |           | Frequência | Porcentagem | Porcentagem válida | Porcentagem acumulativa |
| Válido                          | Normal    | 861        | 65,6        | 65,6               | 65,6                    |
|                                 | Minimal   | 139        | 10,6        | 10,6               | 76,2                    |
|                                 | Moderate  | 217        | 16,5        | 16,5               | 92,7                    |
|                                 | High      | 72         | 5,5         | 5,5                | 98,2                    |
|                                 | Very High | 24         | 1,8         | 1,8                | 100,0                   |
|                                 | Total     | 1313       | 100,0       | 100,0              |                         |

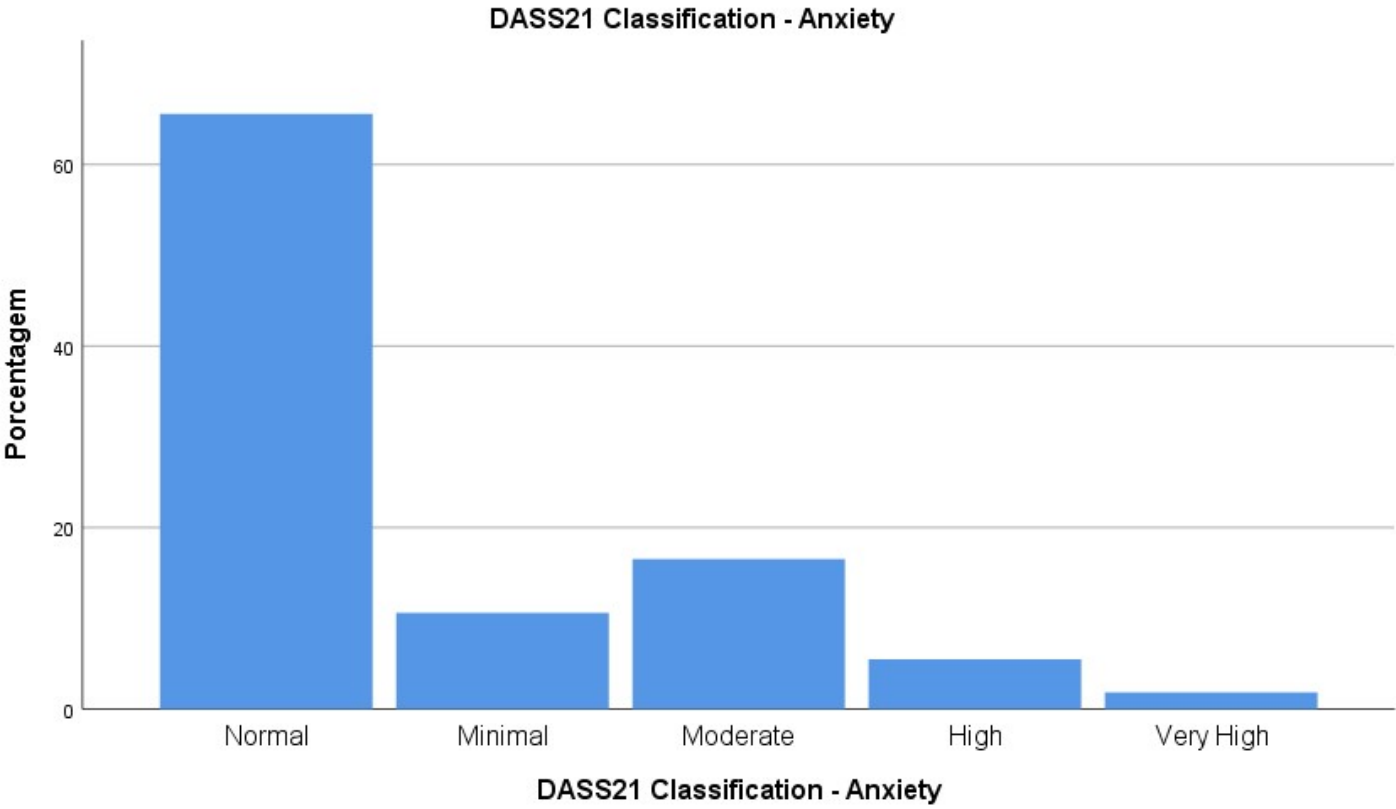

DASS21 Classification - Stress

Estatísticas

DASS21 Classification - Stress

|   |        |      |
|---|--------|------|
| N | Válido | 1313 |
|   | Omisso | 0    |

DASS21 Classification - Stress

|        |          | Frequência | Porcentagem | Porcentagem válida | Porcentagem acumulativa |
|--------|----------|------------|-------------|--------------------|-------------------------|
| Válido | Normal   | 1012       | 77,1        | 77,1               | 77,1                    |
|        | Minimal  | 203        | 15,5        | 15,5               | 92,5                    |
|        | Moderate | 98         | 7,5         | 7,5                | 100,0                   |
|        | Total    | 1313       | 100,0       | 100,0              |                         |

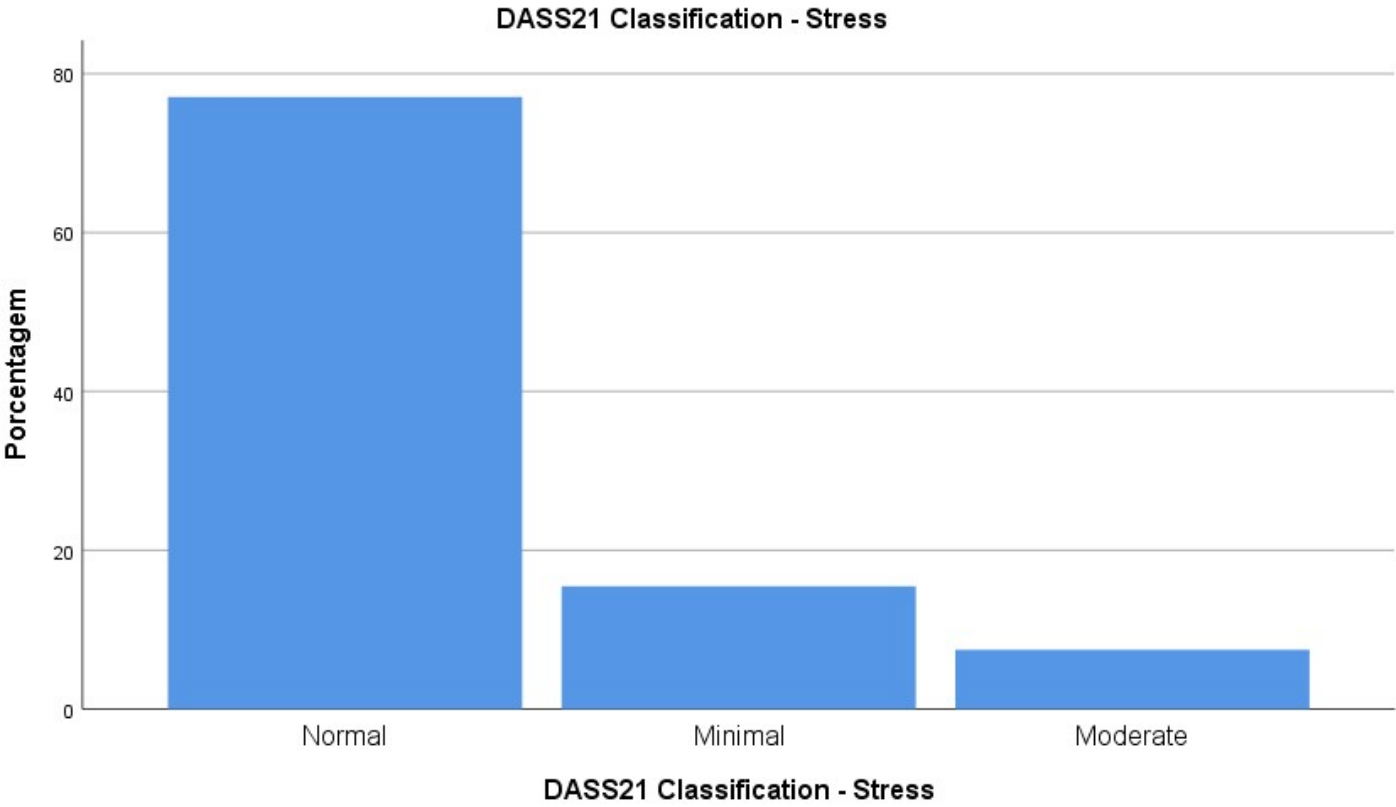

DASS21 Classification - Depression (dichotomous)

Estatísticas

DASS21 Classification - Depression  
(dichotomous)

|   |        |      |
|---|--------|------|
| N | Válido | 1313 |
|   | Omisso | 0    |

DASS21 Classification - Depression (dichotomous)

|        |                     | Frequência | Porcentagem | Porcentagem válida | Porcentagem acumulativa |
|--------|---------------------|------------|-------------|--------------------|-------------------------|
| Válido | Normal              | 870        | 66,3        | 66,3               | 66,3                    |
|        | Abnormal (elevated) | 443        | 33,7        | 33,7               | 100,0                   |
|        | Total               | 1313       | 100,0       | 100,0              |                         |

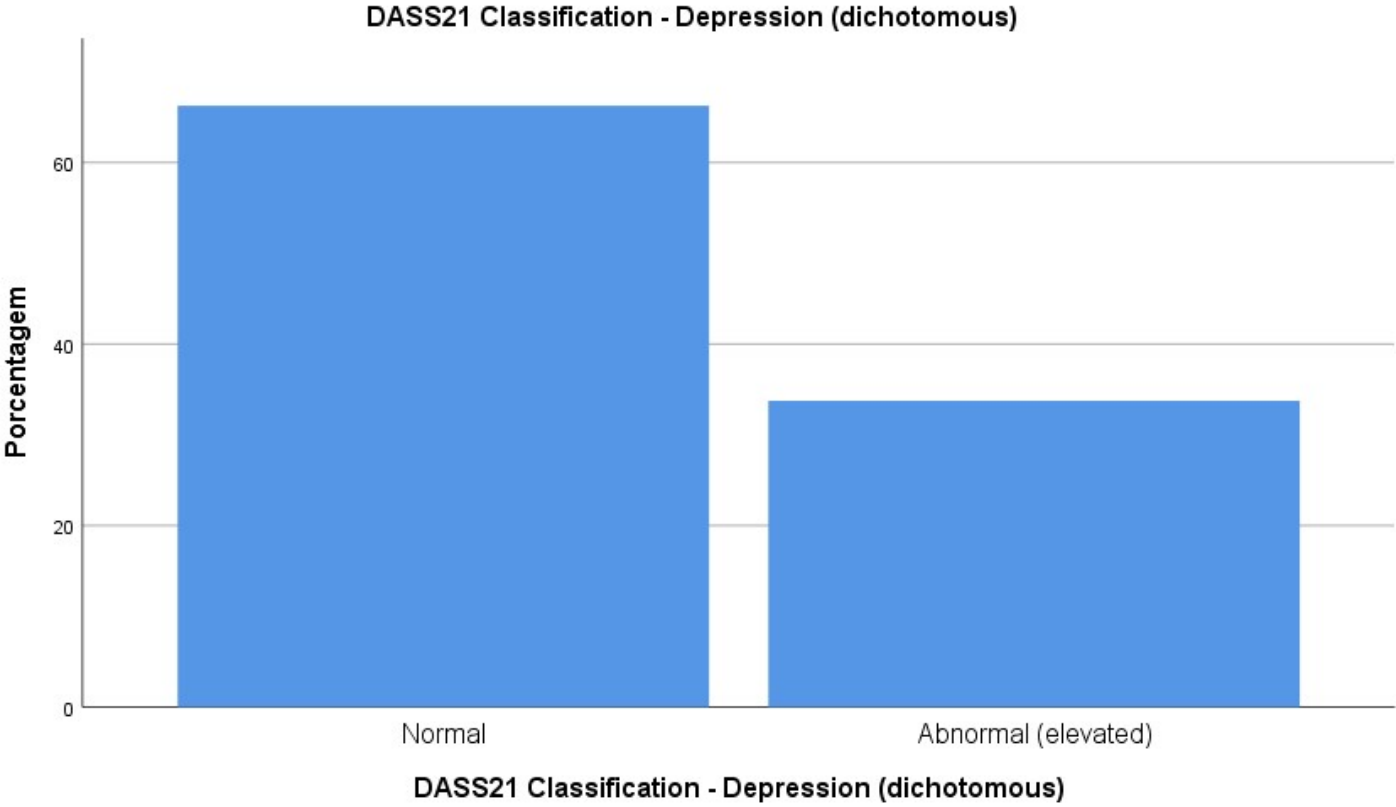

DASS21 Classification - Anxiety (dichotomous)

Estadísticas

DASS21 Classification - Anxiety  
(dichotomous)

|   |        |      |
|---|--------|------|
| N | Válido | 1313 |
|   | Omisso | 0    |

DASS21 Classification - Anxiety (dichotomous)

|        |                     | Frequência | Porcentagem | Porcentagem válida | Porcentagem acumulativa |
|--------|---------------------|------------|-------------|--------------------|-------------------------|
| Válido | Normal              | 861        | 65,6        | 65,6               | 65,6                    |
|        | Abnormal (elevated) | 452        | 34,4        | 34,4               | 100,0                   |
|        | Total               | 1313       | 100,0       | 100,0              |                         |

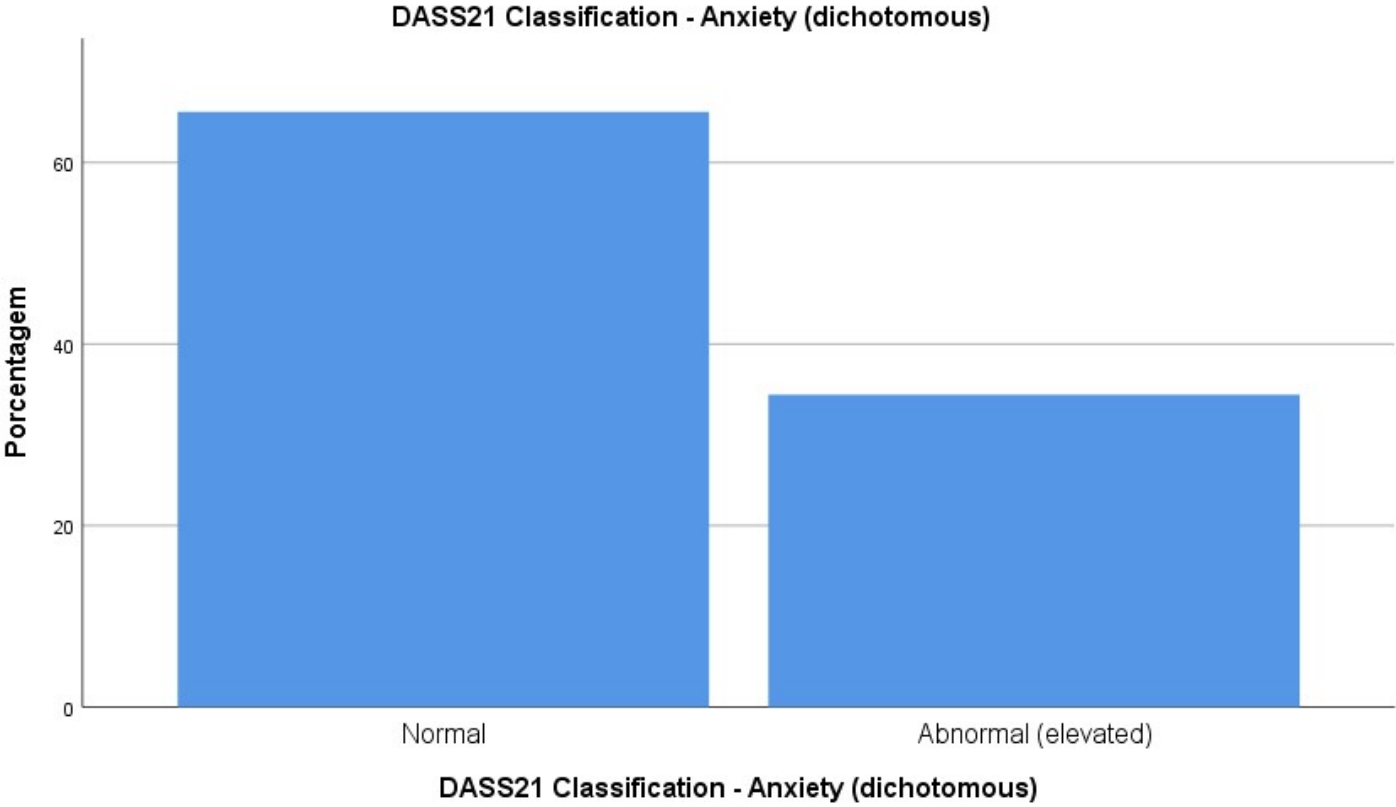

DASS21 Classification - Stress (dichotomous)

Estatísticas

DASS21 Classification - Stress  
(dichotomous)

|   |        |      |
|---|--------|------|
| N | Válido | 1313 |
|   | Omisso | 0    |

DASS21 Classification - Stress (dichotomous)

|        |                     | Frequência | Porcentagem | Porcentagem válida | Porcentagem acumulativa |
|--------|---------------------|------------|-------------|--------------------|-------------------------|
| Válido | Normal              | 1012       | 77,1        | 77,1               | 77,1                    |
|        | Abnormal (elevated) | 301        | 22,9        | 22,9               | 100,0                   |
|        | Total               | 1313       | 100,0       | 100,0              |                         |

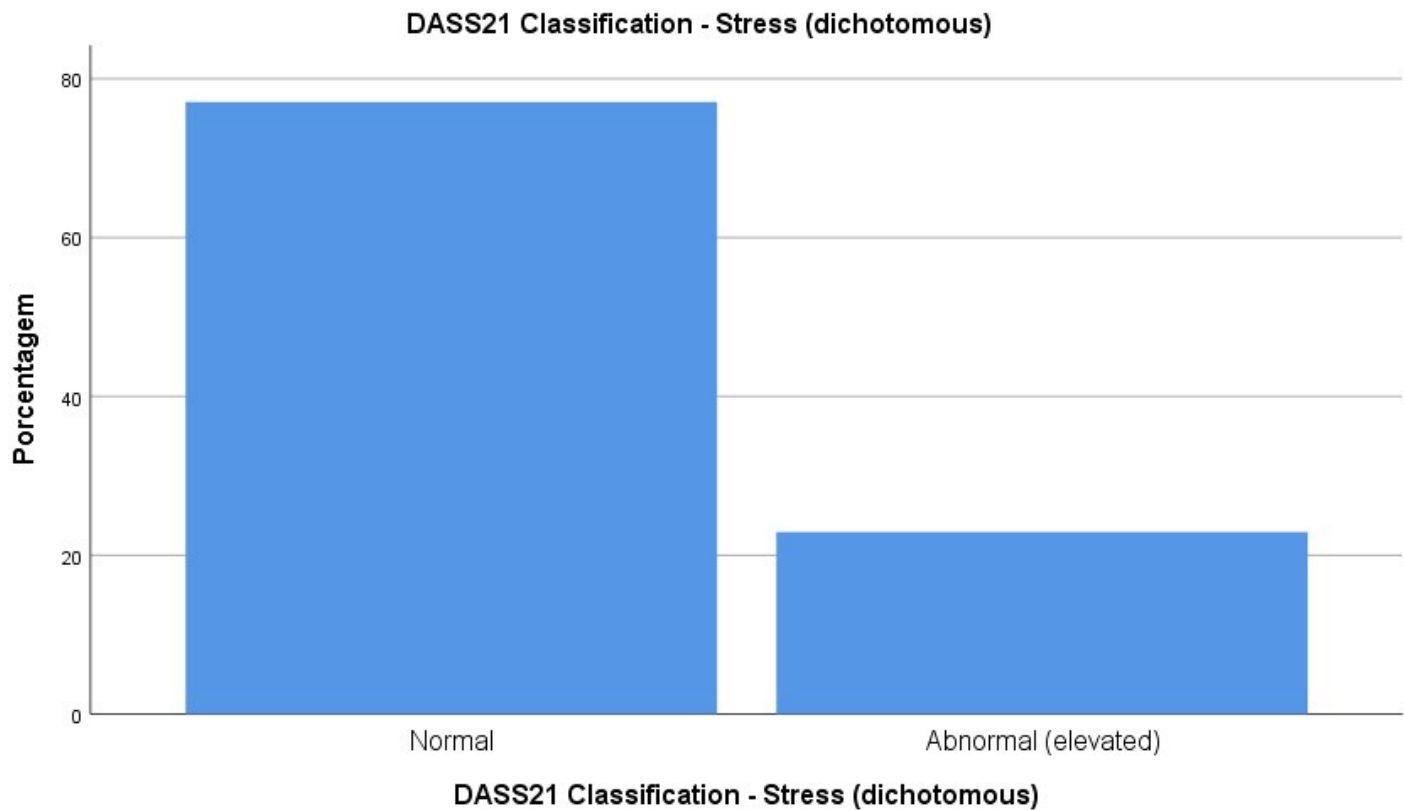

PHQ9 Depression Classification - Risk estimate for having current major depressive disorder

### Estatísticas

PHQ9 Depression Classification - Risk  
estimate for having current major  
depressive disorder

|   |        |      |
|---|--------|------|
| N | Válido | 1313 |
|   | Omisso | 0    |

### PHQ9 Depression Classification - Risk estimate for having current major depressive disorder

|        |       | Frequência | Porcentagem | Porcentagem válida | Porcentagem acumulativa |
|--------|-------|------------|-------------|--------------------|-------------------------|
| Válido | Low   | 429        | 32,7        | 32,7               | 32,7                    |
|        | High  | 884        | 67,3        | 67,3               | 100,0                   |
|        | Total | 1313       | 100,0       | 100,0              |                         |

PHQ9 Depression Classification - Risk estimate for having current major depressive disorder

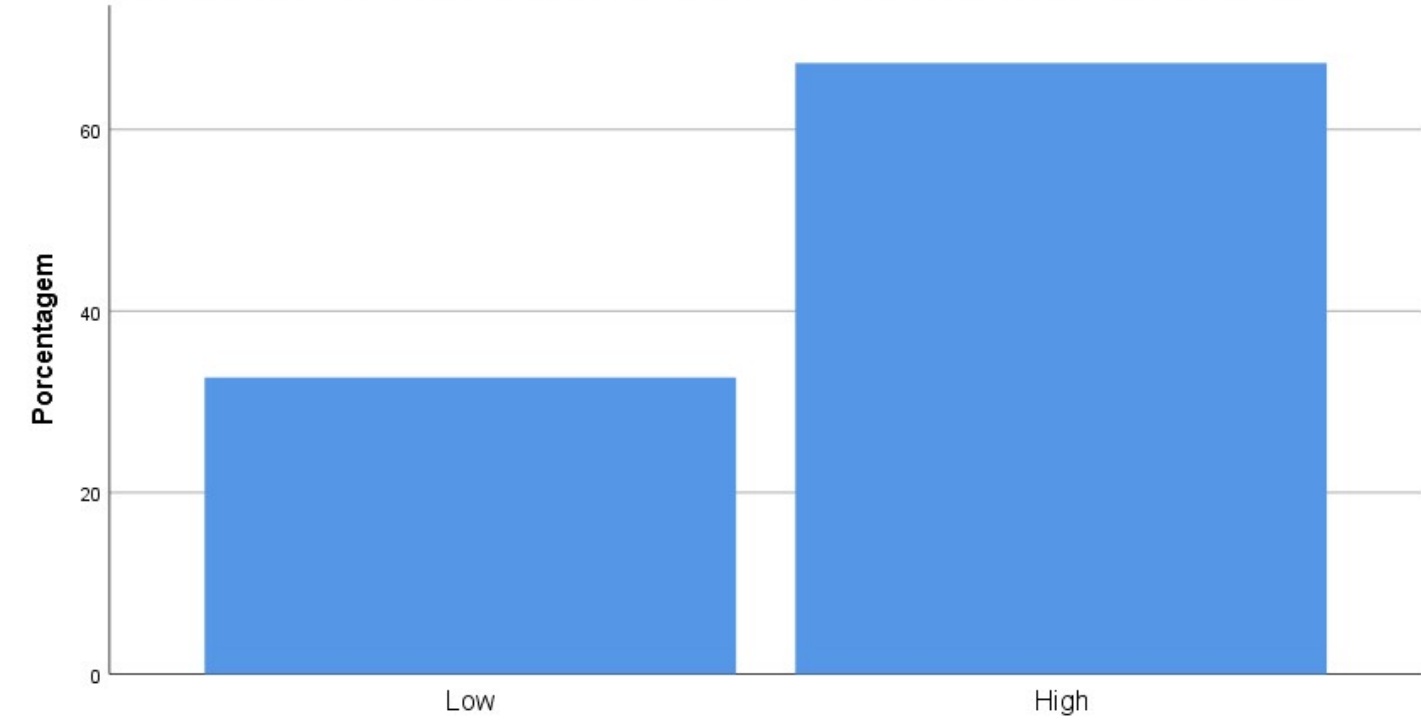

PHQ9 Depression Classification - Risk estimate for having current major depressive disorder

BRCS Classification

Estatísticas

|                     |        |      |
|---------------------|--------|------|
| BRCS Classification |        |      |
| N                   | Válido | 1313 |
|                     | Omisso | 0    |

| BRCS Classification |                  |            |             |                    |                         |
|---------------------|------------------|------------|-------------|--------------------|-------------------------|
|                     |                  | Frequência | Porcentagem | Porcentagem válida | Porcentagem acumulativa |
| Válido              | Low resilience   | 813        | 61,9        | 61,9               | 61,9                    |
|                     | Moderate to High | 500        | 38,1        | 38,1               | 100,0                   |
|                     | Total            | 1313       | 100,0       | 100,0              |                         |

BRCS Classification

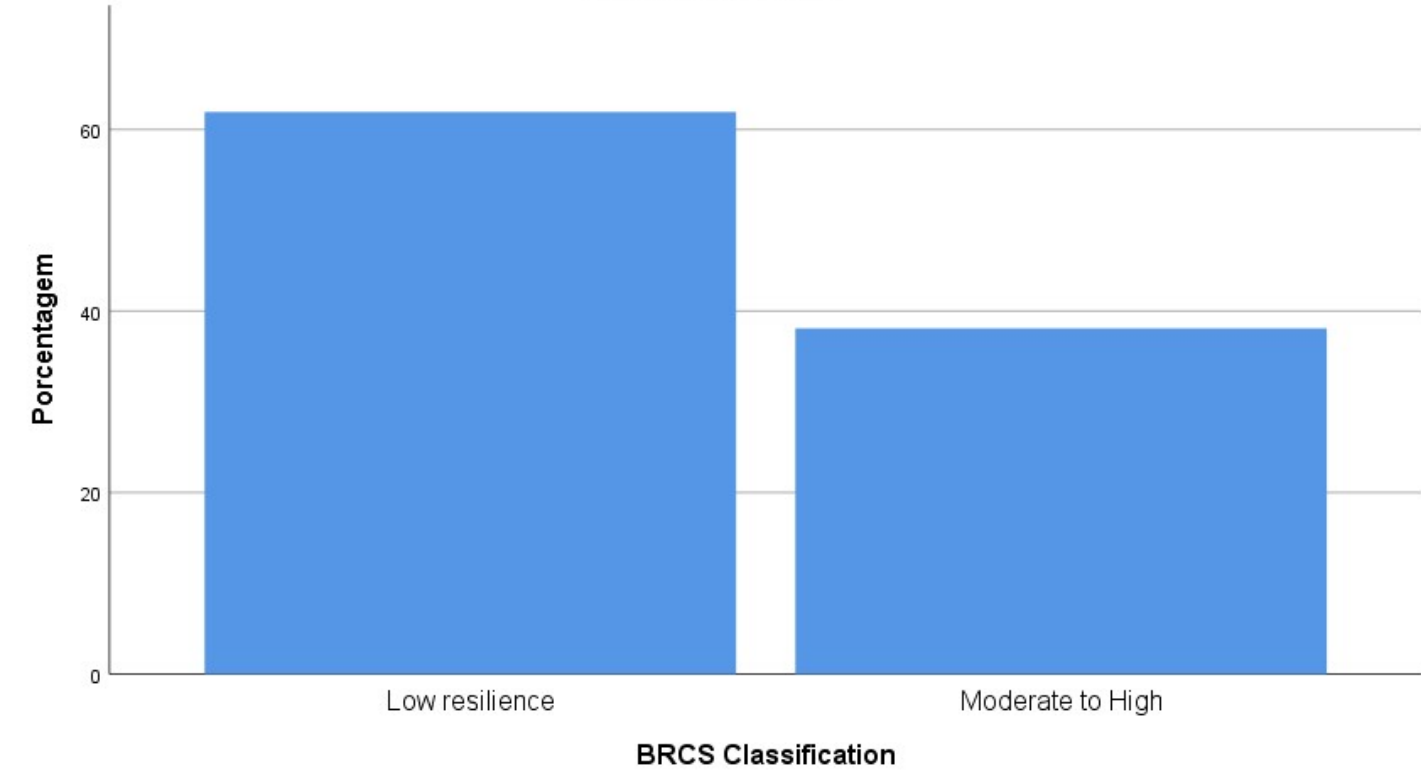

OLBI Score Classification

Estatísticas

|                           |        |      |
|---------------------------|--------|------|
| OLBI Score Classification |        |      |
| N                         | Válido | 1313 |
|                           | Omisso | 0    |

OLBI Score Classification

|        |                 | Frequência | Porcentagem | Porcentagem válida | Porcentagem acumulativa |
|--------|-----------------|------------|-------------|--------------------|-------------------------|
| Válido | Low to Moderate | 875        | 66,6        | 66,6               | 66,6                    |
|        | High            | 438        | 33,4        | 33,4               | 100,0                   |
|        | Total           | 1313       | 100,0       | 100,0              |                         |

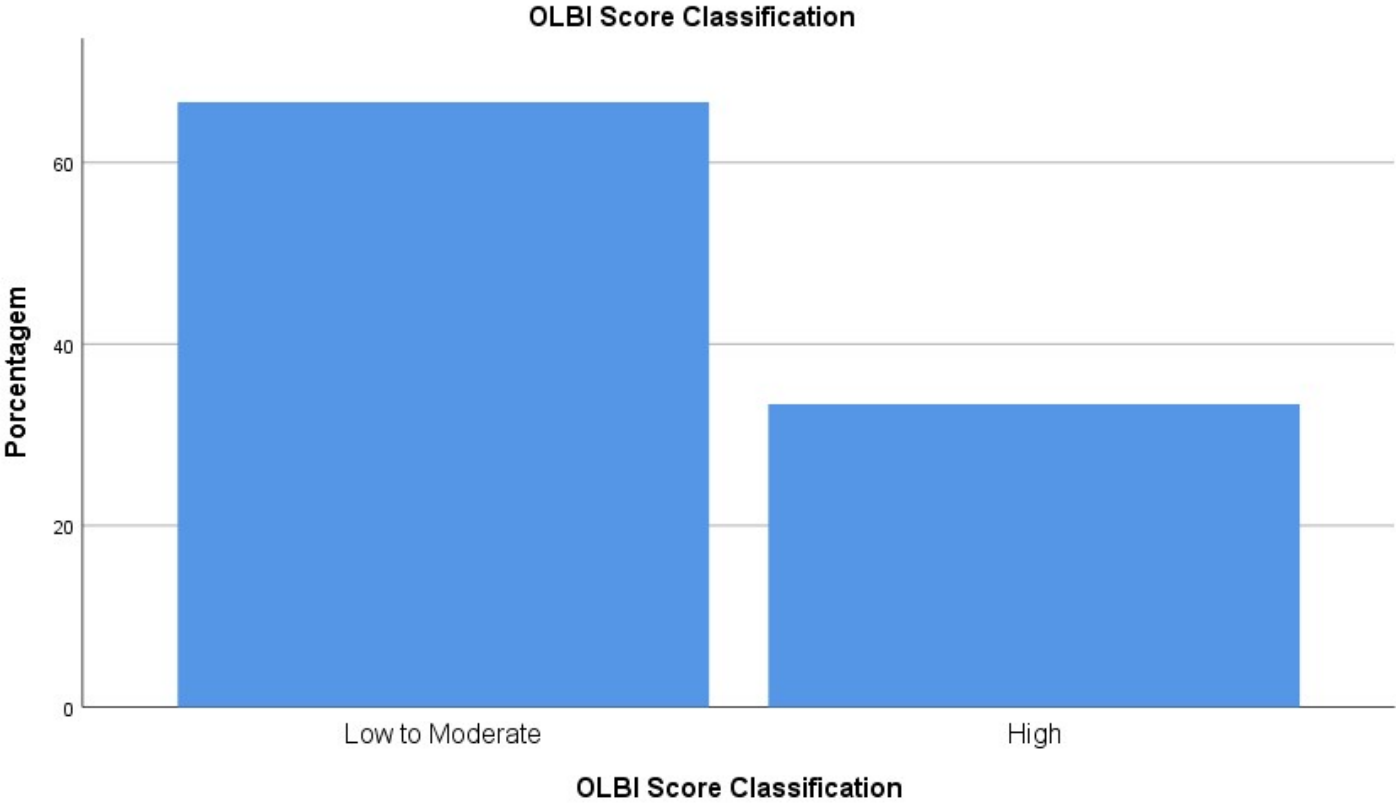

```
FREQUENCIES VARIABLES=DASS21_Q1S DASS21_Q2A DASS21_Q3D DASS21_Q4A DASS21_Q5D DASS21_Q6S
DASS21_Q7A
    DASS21_Q8S DASS21_Q9A DASS21_Q10D DASS21_Q11S DASS21_Q12S DASS21_Q13D DASS21_Q14S
DASS21_Q15A
    DASS21_Q16D DASS21_Q17D DASS21_Q18S DASS21_Q19A DASS21_Q20A DASS21_Q21D
/ORDER=VARIABLE.
```

Frequências

| Observações                 |                                             |                                                                      |
|-----------------------------|---------------------------------------------|----------------------------------------------------------------------|
| Saída criada                |                                             | 20-SEP-2020 11:27:47                                                 |
| Comentários                 |                                             |                                                                      |
| Entrada                     | Dados                                       | C:\Users\User\Documents\Pesquisa\Fellow\FellowGenData_V1.sav         |
|                             | Conjunto de dados ativo                     | ConjuntodeDados1                                                     |
|                             | Filtro                                      | <none>                                                               |
|                             | Ponderação                                  | <none>                                                               |
|                             | Arquivo Dividido                            | <none>                                                               |
|                             | N de linhas em arquivo de dados de trabalho | 1313                                                                 |
|                             |                                             |                                                                      |
| Tratamento de valor omissos | Definição de omissos                        | Os valores omissos definidos pelo usuário são tratados como omissos. |

|                  |                      |                                                                                                                                                                                                                                                                                                                                  |
|------------------|----------------------|----------------------------------------------------------------------------------------------------------------------------------------------------------------------------------------------------------------------------------------------------------------------------------------------------------------------------------|
| Casos utilizados |                      | As estatísticas estão baseadas em todos os casos com dados válidos.                                                                                                                                                                                                                                                              |
| Sintaxe          |                      | FREQUENCIES<br>VARIABLES=DASS21_Q1S<br>DASS21_Q2A DASS21_Q3D<br>DASS21_Q4A DASS21_Q5D<br>DASS21_Q6S DASS21_Q7A<br>DASS21_Q8S DASS21_Q9A<br>DASS21_Q10D DASS21_Q11S<br>DASS21_Q12S DASS21_Q13D<br>DASS21_Q14S DASS21_Q15A<br>DASS21_Q16D<br>DASS21_Q17D DASS21_Q18S<br>DASS21_Q19A DASS21_Q20A<br>DASS21_Q21D<br>/ORDER=VARIABLE. |
| Recursos         | Tempo do processador | 00:00:00,02                                                                                                                                                                                                                                                                                                                      |
|                  | Tempo decorrido      | 00:00:00,02                                                                                                                                                                                                                                                                                                                      |

Achei difícil me acalmar

Estatísticas

|                          |        |      |
|--------------------------|--------|------|
| Achei difícil me acalmar |        |      |
| N                        | Válido | 1313 |
|                          | Omisso | 0    |

| Achei difícil me acalmar |                                                  |            |             |                    |                         |
|--------------------------|--------------------------------------------------|------------|-------------|--------------------|-------------------------|
|                          |                                                  | Frequência | Porcentagem | Porcentagem válida | Porcentagem acumulativa |
| Válido                   | Não se aplica a mim                              | 223        | 17,0        | 17,0               | 17,0                    |
|                          | Aplicou-se em algum grau, por pouco tempo        | 542        | 41,3        | 41,3               | 58,3                    |
|                          | Aplicou-se consideravelmente, boa parte do tempo | 378        | 28,8        | 28,8               | 87,1                    |
|                          | Aplicou-se muito, a maior parte do tempo         | 170        | 12,9        | 12,9               | 100,0                   |
|                          | Total                                            | 1313       | 100,0       | 100,0              |                         |

Senti minha boca seca

## Estatísticas

Senti minha boca seca

|   |        |      |
|---|--------|------|
| N | Válido | 1313 |
|   | Omisso | 0    |

### Senti minha boca seca

|        |                                                  | Frequência | Porcentagem | Porcentagem válida | Porcentagem acumulativa |
|--------|--------------------------------------------------|------------|-------------|--------------------|-------------------------|
| Válido | Não se aplica a mim                              | 634        | 48,3        | 48,3               | 48,3                    |
|        | Aplicou-se em algum grau, por pouco tempo        | 381        | 29,0        | 29,0               | 77,3                    |
|        | Aplicou-se consideravelmente, boa parte do tempo | 194        | 14,8        | 14,8               | 92,1                    |
|        | Aplicou-se muito, a maior parte do tempo         | 104        | 7,9         | 7,9                | 100,0                   |
|        | Total                                            | 1313       | 100,0       | 100,0              |                         |

Não consegui vivenciar nenhum sentimento positivo

## Estatísticas

Não consegui vivenciar nenhum

sentimento positivo

|   |        |      |
|---|--------|------|
| N | Válido | 1313 |
|   | Omisso | 0    |

### Não consegui vivenciar nenhum sentimento positivo

|        |                                                  | Frequência | Porcentagem | Porcentagem válida | Porcentagem acumulativa |
|--------|--------------------------------------------------|------------|-------------|--------------------|-------------------------|
| Válido | Não se aplica a mim                              | 541        | 41,2        | 41,2               | 41,2                    |
|        | Aplicou-se em algum grau, por pouco tempo        | 491        | 37,4        | 37,4               | 78,6                    |
|        | Aplicou-se consideravelmente, boa parte do tempo | 202        | 15,4        | 15,4               | 94,0                    |
|        | Aplicou-se muito, a maior parte do tempo         | 79         | 6,0         | 6,0                | 100,0                   |
|        | Total                                            | 1313       | 100,0       | 100,0              |                         |

Tive dificuldade em respirar em alguns momentos (sem ter feito nenhum esforço físico)

### Estatísticas

Tive dificuldade em respirar em alguns momentos (sem ter feito nenhum esforço físico)

|   |        |      |
|---|--------|------|
| N | Válido | 1313 |
|   | Omisso | 0    |

### Tive dificuldade em respirar em alguns momentos (sem ter feito nenhum esforço físico)

|        |                                                  | Frequência | Porcentagem | Porcentagem válida | Porcentagem acumulativa |
|--------|--------------------------------------------------|------------|-------------|--------------------|-------------------------|
| Válido | Não se aplica a mim                              | 611        | 46,5        | 46,5               | 46,5                    |
|        | Aplicou-se em algum grau, por pouco tempo        | 406        | 30,9        | 30,9               | 77,5                    |
|        | Aplicou-se consideravelmente, boa parte do tempo | 211        | 16,1        | 16,1               | 93,5                    |
|        | Aplicou-se muito, a maior parte do tempo         | 85         | 6,5         | 6,5                | 100,0                   |
|        | Total                                            | 1313       | 100,0       | 100,0              |                         |

Achei difícil ter iniciativa para fazer as coisas

### Estatísticas

Achei difícil ter iniciativa para fazer as coisas

|   |        |      |
|---|--------|------|
| N | Válido | 1313 |
|   | Omisso | 0    |

### Achei difícil ter iniciativa para fazer as coisas

|        |                                                  | Frequência | Porcentagem | Porcentagem válida | Porcentagem acumulativa |
|--------|--------------------------------------------------|------------|-------------|--------------------|-------------------------|
| Válido | Não se aplica a mim                              | 211        | 16,1        | 16,1               | 16,1                    |
|        | Aplicou-se em algum grau, por pouco tempo        | 431        | 32,8        | 32,8               | 48,9                    |
|        | Aplicou-se consideravelmente, boa parte do tempo | 409        | 31,2        | 31,2               | 80,0                    |
|        | Aplicou-se muito, a maior parte do tempo         | 262        | 20,0        | 20,0               | 100,0                   |
|        | Total                                            | 1313       | 100,0       | 100,0              |                         |

Tive a tendência de reagir de forma exagerada às situações

Estatísticas

Tive a tendência de reagir de forma  
exagerada às situações

|   |        |      |
|---|--------|------|
| N | Válido | 1313 |
|   | Omisso | 0    |

Tive a tendência de reagir de forma exagerada às situações

|        |                                                  | Frequência | Porcentagem | Porcentagem válida | Porcentagem acumulativa |
|--------|--------------------------------------------------|------------|-------------|--------------------|-------------------------|
| Válido | Não se aplica a mim                              | 279        | 21,2        | 21,2               | 21,2                    |
|        | Aplicou-se em algum grau, por pouco tempo        | 470        | 35,8        | 35,8               | 57,0                    |
|        | Aplicou-se consideravelmente, boa parte do tempo | 360        | 27,4        | 27,4               | 84,5                    |
|        | Aplicou-se muito, a maior parte do tempo         | 204        | 15,5        | 15,5               | 100,0                   |
|        | Total                                            | 1313       | 100,0       | 100,0              |                         |

Senti tremores (ex.: nas mãos)

Estatísticas

Senti tremores (ex.: nas mãos)

|   |        |      |
|---|--------|------|
| N | Válido | 1313 |
|   | Omisso | 0    |

Senti tremores (ex.: nas mãos)

|        |                                                  | Frequência | Porcentagem | Porcentagem válida | Porcentagem acumulativa |
|--------|--------------------------------------------------|------------|-------------|--------------------|-------------------------|
| Válido | Não se aplica a mim                              | 823        | 62,7        | 62,7               | 62,7                    |
|        | Aplicou-se em algum grau, por pouco tempo        | 296        | 22,5        | 22,5               | 85,2                    |
|        | Aplicou-se consideravelmente, boa parte do tempo | 122        | 9,3         | 9,3                | 94,5                    |

|  |                                          |      |       |       |       |
|--|------------------------------------------|------|-------|-------|-------|
|  | Aplicou-se muito, a maior parte do tempo | 72   | 5,5   | 5,5   | 100,0 |
|  | Total                                    | 1313 | 100,0 | 100,0 |       |

Senti que estava sempre nervoso(a)

Estatísticas

Senti que estava sempre nervoso(a)

|   |        |      |
|---|--------|------|
| N | Válido | 1313 |
|   | Omisso | 0    |

Senti que estava sempre nervoso(a)

|        |                                                  | Frequência | Porcentagem | Porcentagem válida | Porcentagem acumulativa |
|--------|--------------------------------------------------|------------|-------------|--------------------|-------------------------|
| Válido | Não se aplica a mim                              | 262        | 20,0        | 20,0               | 20,0                    |
|        | Aplicou-se em algum grau, por pouco tempo        | 480        | 36,6        | 36,6               | 56,5                    |
|        | Aplicou-se consideravelmente, boa parte do tempo | 337        | 25,7        | 25,7               | 82,2                    |
|        | Aplicou-se muito, a maior parte do tempo         | 234        | 17,8        | 17,8               | 100,0                   |
|        | Total                                            | 1313       | 100,0       | 100,0              |                         |

Preocupei-me com situações em que eu pudesse entrar em pânico e parecesse ridículo(a)

Estatísticas

Preocupei-me com situações em que eu pudesse entrar em pânico e parecesse ridículo(a)

|   |        |      |
|---|--------|------|
| N | Válido | 1313 |
|   | Omisso | 0    |

Preocupei-me com situações em que eu pudesse entrar em pânico e parecesse ridículo(a)

|        |                     | Frequência | Porcentagem | Porcentagem válida | Porcentagem acumulativa |
|--------|---------------------|------------|-------------|--------------------|-------------------------|
| Válido | Não se aplica a mim | 518        | 39,5        | 39,5               | 39,5                    |

|  |                                                  |      |       |       |       |
|--|--------------------------------------------------|------|-------|-------|-------|
|  | Aplicou-se em algum grau, por pouco tempo        | 381  | 29,0  | 29,0  | 68,5  |
|  | Aplicou-se consideravelmente, boa parte do tempo | 243  | 18,5  | 18,5  | 87,0  |
|  | Aplicou-se muito, a maior parte do tempo         | 171  | 13,0  | 13,0  | 100,0 |
|  | Total                                            | 1313 | 100,0 | 100,0 |       |

Senti que não tinha nada a desejar

Estatísticas

Senti que não tinha nada a desejar

|   |        |      |
|---|--------|------|
| N | Válido | 1313 |
|   | Omisso | 0    |

Senti que não tinha nada a desejar

|        |                                                  | Frequência | Porcentagem | Porcentagem válida | Porcentagem acumulativa |
|--------|--------------------------------------------------|------------|-------------|--------------------|-------------------------|
| Válido | Não se aplica a mim                              | 571        | 43,5        | 43,5               | 43,5                    |
|        | Aplicou-se em algum grau, por pouco tempo        | 384        | 29,2        | 29,2               | 72,7                    |
|        | Aplicou-se consideravelmente, boa parte do tempo | 196        | 14,9        | 14,9               | 87,7                    |
|        | Aplicou-se muito, a maior parte do tempo         | 162        | 12,3        | 12,3               | 100,0                   |
|        | Total                                            | 1313       | 100,0       | 100,0              |                         |

Senti-me agitado (a)

Estatísticas

Senti-me agitado(a)

|   |        |      |
|---|--------|------|
| N | Válido | 1313 |
|   | Omisso | 0    |

Senti-me agitado(a)

|  |  | Frequência | Porcentagem | Porcentagem válida | Porcentagem acumulativa |
|--|--|------------|-------------|--------------------|-------------------------|
|--|--|------------|-------------|--------------------|-------------------------|

|        |                                                  |      |       |       |       |
|--------|--------------------------------------------------|------|-------|-------|-------|
| Válido | Não se aplica a mim                              | 242  | 18,4  | 18,4  | 18,4  |
|        | Aplicou-se em algum grau, por pouco tempo        | 461  | 35,1  | 35,1  | 53,5  |
|        | Aplicou-se consideravelmente, boa parte do tempo | 387  | 29,5  | 29,5  | 83,0  |
|        | Aplicou-se muito, a maior parte do tempo         | 223  | 17,0  | 17,0  | 100,0 |
|        | Total                                            | 1313 | 100,0 | 100,0 |       |

Achei difícil relaxar

Estatísticas

|                       |        |      |
|-----------------------|--------|------|
| Achei difícil relaxar |        |      |
| N                     | Válido | 1313 |
|                       | Omisso | 0    |

| Achei difícil relaxar |                                                  |            |             |                    |                         |
|-----------------------|--------------------------------------------------|------------|-------------|--------------------|-------------------------|
|                       |                                                  | Frequência | Porcentagem | Porcentagem válida | Porcentagem acumulativa |
| Válido                | Não se aplica a mim                              | 127        | 9,7         | 9,7                | 9,7                     |
|                       | Aplicou-se em algum grau, por pouco tempo        | 384        | 29,2        | 29,2               | 38,9                    |
|                       | Aplicou-se consideravelmente, boa parte do tempo | 452        | 34,4        | 34,4               | 73,3                    |
|                       | Aplicou-se muito, a maior parte do tempo         | 350        | 26,7        | 26,7               | 100,0                   |
|                       | Total                                            | 1313       | 100,0       | 100,0              |                         |

Senti-me depressivo(a) e sem ânimo

Estatísticas

|                                    |        |      |
|------------------------------------|--------|------|
| Senti-me depressivo(a) e sem ânimo |        |      |
| N                                  | Válido | 1313 |
|                                    | Omisso | 0    |

Senti-me depressivo(a) e sem ânimo

|        |                                                  | Frequência | Porcentagem | Porcentagem válida | Porcentagem acumulativa |
|--------|--------------------------------------------------|------------|-------------|--------------------|-------------------------|
| Válido | Não se aplica a mim                              | 246        | 18,7        | 18,7               | 18,7                    |
|        | Aplicou-se em algum grau, por pouco tempo        | 434        | 33,1        | 33,1               | 51,8                    |
|        | Aplicou-se consideravelmente, boa parte do tempo | 376        | 28,6        | 28,6               | 80,4                    |
|        | Aplicou-se muito, a maior parte do tempo         | 257        | 19,6        | 19,6               | 100,0                   |
|        | Total                                            | 1313       | 100,0       | 100,0              |                         |

Fui intolerante com as coisas que me impediam de continuar o que eu estava fazendo

Estatísticas

Fui intolerante com as coisas que me impediam de continuar o que eu estava fazendo

|   |        |      |
|---|--------|------|
| N | Válido | 1313 |
|   | Omisso | 0    |

Fui intolerante com as coisas que me impediam de continuar o que eu estava fazendo

|        |                                                  | Frequência | Porcentagem | Porcentagem válida | Porcentagem acumulativa |
|--------|--------------------------------------------------|------------|-------------|--------------------|-------------------------|
| Válido | Não se aplica a mim                              | 386        | 29,4        | 29,4               | 29,4                    |
|        | Aplicou-se em algum grau, por pouco tempo        | 512        | 39,0        | 39,0               | 68,4                    |
|        | Aplicou-se consideravelmente, boa parte do tempo | 268        | 20,4        | 20,4               | 88,8                    |
|        | Aplicou-se muito, a maior parte do tempo         | 147        | 11,2        | 11,2               | 100,0                   |
|        | Total                                            | 1313       | 100,0       | 100,0              |                         |

Senti que ia entrar em pânico

Estatísticas

Senti que ia entrar em pânico

|   |        |      |
|---|--------|------|
| N | Válido | 1313 |
|   | Omisso | 0    |

### Senti que ia entrar em pânico

|        |                                                  | Frequência | Porcentagem | Porcentagem válida | Porcentagem acumulativa |
|--------|--------------------------------------------------|------------|-------------|--------------------|-------------------------|
| Válido | Não se aplica a mim                              | 667        | 50,8        | 50,8               | 50,8                    |
|        | Aplicou-se em algum grau, por pouco tempo        | 361        | 27,5        | 27,5               | 78,3                    |
|        | Aplicou-se consideravelmente, boa parte do tempo | 177        | 13,5        | 13,5               | 91,8                    |
|        | Aplicou-se muito, a maior parte do tempo         | 108        | 8,2         | 8,2                | 100,0                   |
|        | Total                                            | 1313       | 100,0       | 100,0              |                         |

Não consegui me entusiasmar com nada

### Estatísticas

Não consegui me entusiasmar com nada

|   |        |      |
|---|--------|------|
| N | Válido | 1313 |
|   | Omisso | 0    |

### Não consegui me entusiasmar com nada

|        |                                                  | Frequência | Porcentagem | Porcentagem válida | Porcentagem acumulativa |
|--------|--------------------------------------------------|------------|-------------|--------------------|-------------------------|
| Válido | Não se aplica a mim                              | 436        | 33,2        | 33,2               | 33,2                    |
|        | Aplicou-se em algum grau, por pouco tempo        | 417        | 31,8        | 31,8               | 65,0                    |
|        | Aplicou-se consideravelmente, boa parte do tempo | 272        | 20,7        | 20,7               | 85,7                    |
|        | Aplicou-se muito, a maior parte do tempo         | 188        | 14,3        | 14,3               | 100,0                   |
|        | Total                                            | 1313       | 100,0       | 100,0              |                         |

Senti que não tinha valor como pessoa

### Estatísticas

Senti que não tinha valor como pessoa

|   |        |      |
|---|--------|------|
| N | Válido | 1313 |
|---|--------|------|

|        |   |
|--------|---|
| Omisso | 0 |
|--------|---|

Senti que não tinha valor como pessoa

|        |                                                  | Frequência | Porcentagem | Porcentagem válida | Porcentagem acumulativa |
|--------|--------------------------------------------------|------------|-------------|--------------------|-------------------------|
| Válido | Não se aplica a mim                              | 630        | 48,0        | 48,0               | 48,0                    |
|        | Aplicou-se em algum grau, por pouco tempo        | 297        | 22,6        | 22,6               | 70,6                    |
|        | Aplicou-se consideravelmente, boa parte do tempo | 202        | 15,4        | 15,4               | 86,0                    |
|        | Aplicou-se muito, a maior parte do tempo         | 184        | 14,0        | 14,0               | 100,0                   |
|        | Total                                            | 1313       | 100,0       | 100,0              |                         |

Senti que estava um pouco emotivo(a)/sensível demais

Estatísticas

Senti que estava um pouco  
emotivo(a)/sensível demais

|   |        |      |
|---|--------|------|
| N | Válido | 1313 |
|   | Omisso | 0    |

Senti que estava um pouco emotivo(a)/sensível demais

|        |                                                  | Frequência | Porcentagem | Porcentagem válida | Porcentagem acumulativa |
|--------|--------------------------------------------------|------------|-------------|--------------------|-------------------------|
| Válido | Não se aplica a mim                              | 201        | 15,3        | 15,3               | 15,3                    |
|        | Aplicou-se em algum grau, por pouco tempo        | 398        | 30,3        | 30,3               | 45,6                    |
|        | Aplicou-se consideravelmente, boa parte do tempo | 405        | 30,8        | 30,8               | 76,5                    |
|        | Aplicou-se muito, a maior parte do tempo         | 309        | 23,5        | 23,5               | 100,0                   |
|        | Total                                            | 1313       | 100,0       | 100,0              |                         |

Sabia que meu coração estava alterado mesmo não tendo feito nenhum esforço físico (ex.: aumento da frequência cardíaca, disritmia cardíaca)

## Estatísticas

Sabia que meu coração estava alterado mesmo não tendo feito nenhum esforço físico (ex.: aumento da frequência cardíaca, disritmia cardíaca)

|   |        |      |
|---|--------|------|
| N | Válido | 1313 |
|   | Omisso | 0    |

### Sabia que meu coração estava alterado mesmo não tendo feito nenhum esforço físico (ex.: aumento da frequência cardíaca, disritmia cardíaca)

|        |                                                  | Frequência | Porcentagem | Porcentagem válida | Porcentagem acumulativa |
|--------|--------------------------------------------------|------------|-------------|--------------------|-------------------------|
| Válido | Não se aplica a mim                              | 592        | 45,1        | 45,1               | 45,1                    |
|        | Aplicou-se em algum grau, por pouco tempo        | 357        | 27,2        | 27,2               | 72,3                    |
|        | Aplicou-se consideravelmente, boa parte do tempo | 222        | 16,9        | 16,9               | 89,2                    |
|        | Aplicou-se muito, a maior parte do tempo         | 142        | 10,8        | 10,8               | 100,0                   |
|        | Total                                            | 1313       | 100,0       | 100,0              |                         |

Senti medo sem motivo

## Estatísticas

Senti medo sem motivo

|   |        |      |
|---|--------|------|
| N | Válido | 1313 |
|   | Omisso | 0    |

### Senti medo sem motivo

|        |                                                  | Frequência | Porcentagem | Porcentagem válida | Porcentagem acumulativa |
|--------|--------------------------------------------------|------------|-------------|--------------------|-------------------------|
| Válido | Não se aplica a mim                              | 530        | 40,4        | 40,4               | 40,4                    |
|        | Aplicou-se em algum grau, por pouco tempo        | 385        | 29,3        | 29,3               | 69,7                    |
|        | Aplicou-se consideravelmente, boa parte do tempo | 226        | 17,2        | 17,2               | 86,9                    |
|        | Aplicou-se muito, a maior parte do tempo         | 172        | 13,1        | 13,1               | 100,0                   |
|        | Total                                            | 1313       | 100,0       | 100,0              |                         |

Senti que a vida não tinha sentido

Estatísticas

Senti que a vida não tinha sentido

|   |        |      |
|---|--------|------|
| N | Válido | 1313 |
|   | Omisso | 0    |

Senti que a vida não tinha sentido

|        |                                                  | Frequência | Porcentagem | Porcentagem válida | Porcentagem acumulativa |
|--------|--------------------------------------------------|------------|-------------|--------------------|-------------------------|
| Válido | Não se aplica a mim                              | 816        | 62,1        | 62,1               | 62,1                    |
|        | Aplicou-se em algum grau, por pouco tempo        | 241        | 18,4        | 18,4               | 80,5                    |
|        | Aplicou-se consideravelmente, boa parte do tempo | 140        | 10,7        | 10,7               | 91,2                    |
|        | Aplicou-se muito, a maior parte do tempo         | 116        | 8,8         | 8,8                | 100,0                   |
|        | Total                                            | 1313       | 100,0       | 100,0              |                         |

```
FREQUENCIES VARIABLES=PHQ9_Q1 PHQ9_Q2 PHQ9_Q3 PHQ9_Q4 PHQ9_Q5 PHQ9_Q6 PHQ9_Q7 PHQ9_Q8 PHQ9_Q9
/ORDER=VARIABLE.
```

Frequências

Observações

|              |                                             |                                                              |
|--------------|---------------------------------------------|--------------------------------------------------------------|
| Saída criada |                                             | 20-SEP-2020 11:28:17                                         |
| Comentários  |                                             |                                                              |
| Entrada      | Dados                                       | C:\Users\User\Documents\Pesquisa\Fellow\FellowGenData_V1.sav |
|              | Conjunto de dados ativo                     | ConjuntodeDados1                                             |
|              | Filtro                                      | <none>                                                       |
|              | Ponderação                                  | <none>                                                       |
|              | Arquivo Dividido                            | <none>                                                       |
|              | N de linhas em arquivo de dados de trabalho | 1313                                                         |
|              |                                             |                                                              |

|                             |                      |                                                                                                                               |
|-----------------------------|----------------------|-------------------------------------------------------------------------------------------------------------------------------|
| Tratamento de valor omissos | Definição de omissos | Os valores omissos definidos pelo usuário são tratados como omissos.                                                          |
|                             | Casos utilizados     | As estatísticas estão baseadas em todos os casos com dados válidos.                                                           |
| Sintaxe                     |                      | FREQUENCIES<br>VARIABLES=PHQ9_Q1 PHQ9_Q2<br>PHQ9_Q3 PHQ9_Q4 PHQ9_Q5<br>PHQ9_Q6 PHQ9_Q7 PHQ9_Q8<br>PHQ9_Q9<br>/ORDER=VARIABLE. |
| Recursos                    | Tempo do processador | 00:00:00,02                                                                                                                   |
|                             | Tempo decorrido      | 00:00:00,02                                                                                                                   |

Nas últimas duas semanas, em qual proporção de tempo o(a) sr.(a) teve pouco interesse ou pouco prazer em fazer as coisas?

## Estatísticas

Nas últimas duas semanas, em qual proporção de tempo o(a) sr.(a) teve pouco interesse ou pouco prazer em fazer as coisas?

|   |         |      |
|---|---------|------|
| N | Válido  | 1313 |
|   | Omissos | 0    |

**Nas últimas duas semanas, em qual proporção de tempo o(a) sr.(a) teve pouco interesse ou pouco prazer em fazer as coisas?**

|        |                     | Frequência | Porcentagem | Porcentagem válida | Porcentagem acumulativa |
|--------|---------------------|------------|-------------|--------------------|-------------------------|
| Válido | Nenhum dia          | 214        | 16,3        | 16,3               | 16,3                    |
|        | Menos de 1 semana   | 532        | 40,5        | 40,5               | 56,8                    |
|        | 1 semana ou mais    | 304        | 23,2        | 23,2               | 80,0                    |
|        | Quase todos os dias | 263        | 20,0        | 20,0               | 100,0                   |
|        | Total               | 1313       | 100,0       | 100,0              |                         |

Nas últimas duas semanas, em qual proporção de tempo o(a) sr.(a) se sentiu para baixo, deprimido(a) ou sem

## Estatísticas

Nas últimas duas semanas, em qual proporção de tempo o(a) sr.(a) se sentiu para baixo, deprimido(a) ou sem

|   |        |      |
|---|--------|------|
| N | Válido | 1313 |
|   | Omisso | 0    |

**Nas últimas duas semanas, em qual proporção de tempo o(a) sr.(a) se sentiu para baixo, deprimido(a) ou sem**

|        |                     | Frequência | Porcentagem | Porcentagem válida | Porcentagem acumulativa |
|--------|---------------------|------------|-------------|--------------------|-------------------------|
| Válido | Nenhum dia          | 287        | 21,9        | 21,9               | 21,9                    |
|        | Menos de 1 semana   | 493        | 37,5        | 37,5               | 59,4                    |
|        | 1 semana ou mais    | 327        | 24,9        | 24,9               | 84,3                    |
|        | Quase todos os dias | 206        | 15,7        | 15,7               | 100,0                   |
|        | Total               | 1313       | 100,0       | 100,0              |                         |

Nas últimas duas semanas, em qual proporção de tempo o(a) sr.(a) teve dificuldade para pegar no sono ou permanecer dormindo ou dormiu mais do que de costume?

**Estatísticas**

Nas últimas duas semanas, em qual proporção de tempo o(a) sr.(a) teve dificuldade para pegar no sono ou permanecer dormindo ou dormiu mais do que de costume?

|   |        |      |
|---|--------|------|
| N | Válido | 1313 |
|   | Omisso | 0    |

**Nas últimas duas semanas, em qual proporção de tempo o(a) sr.(a) teve dificuldade para pegar no sono ou permanecer dormindo ou dormiu mais do que de costume?**

|        |                     | Frequência | Porcentagem | Porcentagem válida | Porcentagem acumulativa |
|--------|---------------------|------------|-------------|--------------------|-------------------------|
| Válido | Nenhum dia          | 251        | 19,1        | 19,1               | 19,1                    |
|        | Menos de 1 semana   | 338        | 25,7        | 25,7               | 44,9                    |
|        | 1 semana ou mais    | 353        | 26,9        | 26,9               | 71,7                    |
|        | Quase todos os dias | 371        | 28,3        | 28,3               | 100,0                   |
|        | Total               | 1313       | 100,0       | 100,0              |                         |

Nas últimas duas semanas, em qual proporção de tempo o(a) sr. (a ) se sentiu cansado(a) ou com pouca energia?

### Estatísticas

Nas últimas duas semanas, em qual proporção de tempo o(a) sr.(a) se sentiu cansado(a) ou com pouca energia?

|   |        |      |
|---|--------|------|
| N | Válido | 1313 |
|   | Omisso | 0    |

**Nas últimas duas semanas, em qual proporção de tempo o(a) sr.(a) se sentiu cansado(a) ou com pouca energia?**

|        |                     | Frequência | Porcentagem | Porcentagem válida | Porcentagem acumulativa |
|--------|---------------------|------------|-------------|--------------------|-------------------------|
| Válido | Nenhum dia          | 79         | 6,0         | 6,0                | 6,0                     |
|        | Menos de 1 semana   | 320        | 24,4        | 24,4               | 30,4                    |
|        | 1 semana ou mais    | 410        | 31,2        | 31,2               | 61,6                    |
|        | Quase todos os dias | 504        | 38,4        | 38,4               | 100,0                   |
|        | Total               | 1313       | 100,0       | 100,0              |                         |

Nas últimas duas semanas, em qual proporção de tempo o(a) sr.(a) teve falta de apetite ou comeu demais?

### Estatísticas

Nas últimas duas semanas, em qual proporção de tempo o(a) sr.(a) teve falta de apetite ou comeu demais?

|   |        |      |
|---|--------|------|
| N | Válido | 1313 |
|   | Omisso | 0    |

**Nas últimas duas semanas, em qual proporção de tempo o(a) sr.(a) teve falta de apetite ou comeu demais?**

|        |                     | Frequência | Porcentagem | Porcentagem válida | Porcentagem acumulativa |
|--------|---------------------|------------|-------------|--------------------|-------------------------|
| Válido | Nenhum dia          | 274        | 20,9        | 20,9               | 20,9                    |
|        | Menos de 1 semana   | 343        | 26,1        | 26,1               | 47,0                    |
|        | 1 semana ou mais    | 335        | 25,5        | 25,5               | 72,5                    |
|        | Quase todos os dias | 361        | 27,5        | 27,5               | 100,0                   |
|        | Total               | 1313       | 100,0       | 100,0              |                         |

Nas últimas duas semanas, em qual proporção de tempo o(a) sr.(a) se sentiu mal consigo mesmo(a) ou achou que é um fracasso ou que decepcionou sua família ou a você mesmo(a)?

### Estatísticas

Nas últimas duas semanas, em qual proporção de tempo o(a) sr.(a) se sentiu mal consigo mesmo(a) ou achou que é um fracasso ou que decepcionou sua família ou a você mesmo(a)?

|   |        |      |
|---|--------|------|
| N | Válido | 1313 |
|   | Omisso | 0    |

**Nas últimas duas semanas, em qual proporção de tempo o(a) sr.(a) se sentiu mal consigo mesmo(a) ou achou que é um fracasso ou que decepcionou sua família ou a você mesmo(a)?**

|        |                     | Frequência | Porcentagem | Porcentagem válida | Porcentagem acumulativa |
|--------|---------------------|------------|-------------|--------------------|-------------------------|
| Válido | Nenhum dia          | 445        | 33,9        | 33,9               | 33,9                    |
|        | Menos de 1 semana   | 382        | 29,1        | 29,1               | 63,0                    |
|        | 1 semana ou mais    | 273        | 20,8        | 20,8               | 83,8                    |
|        | Quase todos os dias | 213        | 16,2        | 16,2               | 100,0                   |
|        | Total               | 1313       | 100,0       | 100,0              |                         |

Nas últimas duas semanas, em qual proporção de tempo o(a) sr.(a) teve dificuldade para se concentrar nas coisas (como ler o jornal ou ver televisão)?

### Estatísticas

Nas últimas duas semanas, em qual proporção de tempo o(a) sr.(a) teve dificuldade para se concentrar nas coisas (como ler o jornal ou ver televisão)?

|   |        |      |
|---|--------|------|
| N | Válido | 1313 |
|   | Omisso | 0    |

**Nas últimas duas semanas, em qual proporção de tempo o(a) sr.(a) teve dificuldade para se concentrar nas coisas (como ler o jornal ou ver televisão)?**

|        |                   | Frequência | Porcentagem | Porcentagem válida | Porcentagem acumulativa |
|--------|-------------------|------------|-------------|--------------------|-------------------------|
| Válido | Nenhum dia        | 219        | 16,7        | 16,7               | 16,7                    |
|        | Menos de 1 semana | 407        | 31,0        | 31,0               | 47,7                    |

|                     |      |       |       |       |
|---------------------|------|-------|-------|-------|
| 1 semana ou mais    | 397  | 30,2  | 30,2  | 77,9  |
| Quase todos os dias | 290  | 22,1  | 22,1  | 100,0 |
| Total               | 1313 | 100,0 | 100,0 |       |

Nas últimas duas semanas, em qual proporção de tempo o(a) sr.(a) teve lentidão para se movimentar ou falar (a ponto das outras pessoas perceberem), ou ao contrário, esteve tão agitado(a) que você ...

### Estatísticas

Nas últimas duas semanas, em qual proporção de tempo o(a) sr.(a) teve lentidão para se movimentar ou falar (a ponto das outras pessoas perceberem), ou ao contrário, esteve tão agitado(a) que você ...

|   |        |      |
|---|--------|------|
| N | Válido | 1313 |
|   | Omisso | 0    |

**Nas últimas duas semanas, em qual proporção de tempo o(a) sr.(a) teve lentidão para se movimentar ou falar (a ponto das outras pessoas perceberem), ou ao contrário, esteve tão agitado(a) que você ...**

|        |                     | Frequência | Porcentagem | Porcentagem válida | Porcentagem acumulativa |
|--------|---------------------|------------|-------------|--------------------|-------------------------|
| Válido | Nenhum dia          | 619        | 47,1        | 47,1               | 47,1                    |
|        | Menos de 1 semana   | 352        | 26,8        | 26,8               | 74,0                    |
|        | 1 semana ou mais    | 217        | 16,5        | 16,5               | 90,5                    |
|        | Quase todos os dias | 125        | 9,5         | 9,5                | 100,0                   |
|        | Total               | 1313       | 100,0       | 100,0              |                         |

Nas últimas duas semanas, em qual proporção de tempo o(a) sr.(a) pensou em se ferir de alguma maneira ou que seria melhor estar morto(a)?

### Estatísticas

Nas últimas duas semanas, em qual proporção de tempo o(a) sr.(a) pensou em se ferir de alguma maneira ou que seria melhor estar morto(a)?

|   |        |      |
|---|--------|------|
| N | Válido | 1313 |
|   | Omisso | 0    |

Nas últimas duas semanas, em qual proporção de tempo o(a) sr.(a) pensou em se ferir de alguma maneira ou que seria melhor estar morto(a)?

|        |                     | Frequência | Porcentagem | Porcentagem válida | Porcentagem acumulativa |
|--------|---------------------|------------|-------------|--------------------|-------------------------|
| Válido | Nenhum dia          | 1081       | 82,3        | 82,3               | 82,3                    |
|        | Menos de 1 semana   | 143        | 10,9        | 10,9               | 93,2                    |
|        | 1 semana ou mais    | 52         | 4,0         | 4,0                | 97,2                    |
|        | Quase todos os dias | 37         | 2,8         | 2,8                | 100,0                   |
|        | Total               | 1313       | 100,0       | 100,0              |                         |

FREQUENCIES VARIABLES=BRCS\_Q1 BRCS\_Q2 BRCS\_Q3 BRCS\_Q4  
/ORDER=VARIABLE.

Frequências

### Observações

|                             |                                             |                                                                                 |
|-----------------------------|---------------------------------------------|---------------------------------------------------------------------------------|
| Saída criada                |                                             | 20-SEP-2020 11:28:41                                                            |
| Comentários                 |                                             |                                                                                 |
| Entrada                     | Dados                                       | C:\Users\User\Documents\Pesquisa\Fellow\FellowGenData_V1.sav                    |
|                             | Conjunto de dados ativo                     | ConjuntodeDados1                                                                |
|                             | Filtro                                      | <none>                                                                          |
|                             | Ponderação                                  | <none>                                                                          |
|                             | Arquivo Dividido                            | <none>                                                                          |
|                             | N de linhas em arquivo de dados de trabalho | 1313                                                                            |
| Tratamento de valor omissos | Definição de omissos                        | Os valores omissos definidos pelo usuário são tratados como omissos.            |
|                             | Casos utilizados                            | As estatísticas estão baseadas em todos os casos com dados válidos.             |
| Sintaxe                     |                                             | FREQUENCIES<br>VARIABLES=BRCS_Q1 BRCS_Q2<br>BRCS_Q3 BRCS_Q4<br>/ORDER=VARIABLE. |
| Recursos                    | Tempo do processador                        | 00:00:00,02                                                                     |
|                             | Tempo decorrido                             | 00:00:00,02                                                                     |

Procuro formas criativas de superar situações difíceis

## Estatísticas

Procuo formas criativas de superar

situações difíceis

|   |        |      |
|---|--------|------|
| N | Válido | 1313 |
|   | Omisso | 0    |

## Procuo formas criativas de superar situações difíceis

|        |                      | Frequência | Porcentagem | Porcentagem válida | Porcentagem acumulativa |
|--------|----------------------|------------|-------------|--------------------|-------------------------|
| Válido | Quase nunca          | 163        | 12,4        | 12,4               | 12,4                    |
|        | Ocasionalmente       | 404        | 30,8        | 30,8               | 43,2                    |
|        | Muitas vezes         | 373        | 28,4        | 28,4               | 71,6                    |
|        | Com muita frequência | 200        | 15,2        | 15,2               | 86,8                    |
|        | Quase sempre         | 173        | 13,2        | 13,2               | 100,0                   |
|        | Total                | 1313       | 100,0       | 100,0              |                         |

Independentemente do que me possa acontecer acredito que posso controlar

## Estatísticas

Independentemente do que me possa

acontecer acredito que posso controlar

|   |        |      |
|---|--------|------|
| N | Válido | 1313 |
|   | Omisso | 0    |

## Independentemente do que me possa acontecer acredito que posso controlar

|        |                      | Frequência | Porcentagem | Porcentagem válida | Porcentagem acumulativa |
|--------|----------------------|------------|-------------|--------------------|-------------------------|
| Válido | Quase nunca          | 108        | 8,2         | 8,2                | 8,2                     |
|        | Ocasionalmente       | 346        | 26,4        | 26,4               | 34,6                    |
|        | Muitas vezes         | 438        | 33,4        | 33,4               | 67,9                    |
|        | Com muita frequência | 253        | 19,3        | 19,3               | 87,2                    |
|        | Quase sempre         | 168        | 12,8        | 12,8               | 100,0                   |
|        | Total                | 1313       | 100,0       | 100,0              |                         |

Acredito que posso crescer positivamente lidando com situações difíceis.

## Estatísticas

Acredito que posso crescer  
positivamente lidando com situações  
difíceis.

|   |        |      |
|---|--------|------|
| N | Válido | 1313 |
|   | Omisso | 0    |

### Acredito que posso crescer positivamente lidando com situações difíceis.

|        |                      | Frequência | Porcentagem | Porcentagem válida | Porcentagem acumulativa |
|--------|----------------------|------------|-------------|--------------------|-------------------------|
| Válido | Quase nunca          | 64         | 4,9         | 4,9                | 4,9                     |
|        | Ocasionalmente       | 215        | 16,4        | 16,4               | 21,2                    |
|        | Muitas vezes         | 380        | 28,9        | 28,9               | 50,2                    |
|        | Com muita frequência | 327        | 24,9        | 24,9               | 75,1                    |
|        | Quase sempre         | 327        | 24,9        | 24,9               | 100,0                   |
|        | Total                | 1313       | 100,0       | 100,0              |                         |

Procuro ativamente formas de substituir as perdas que encontro na vida.

## Estatísticas

Procuro ativamente formas de substituir  
as perdas que encontro na vida.

|   |        |      |
|---|--------|------|
| N | Válido | 1313 |
|   | Omisso | 0    |

### Procuro ativamente formas de substituir as perdas que encontro na vida.

|        |                      | Frequência | Porcentagem | Porcentagem válida | Porcentagem acumulativa |
|--------|----------------------|------------|-------------|--------------------|-------------------------|
| Válido | Quase nunca          | 136        | 10,4        | 10,4               | 10,4                    |
|        | Ocasionalmente       | 335        | 25,5        | 25,5               | 35,9                    |
|        | Muitas vezes         | 366        | 27,9        | 27,9               | 63,7                    |
|        | Com muita frequência | 283        | 21,6        | 21,6               | 85,3                    |
|        | Quase sempre         | 193        | 14,7        | 14,7               | 100,0                   |
|        | Total                | 1313       | 100,0       | 100,0              |                         |

FREQUENCIES VARIABLES=OLBI\_Q1D OLBI\_Q2D OLBI\_Q3D OLBI\_Q4D OLBI\_Q5D OLBI\_Q6D OLBI\_Q7D  
OLBI\_Q8D  
OLBI\_Q1E OLBI\_Q2E OLBI\_Q3E OLBI\_Q4E OLBI\_Q5E OLBI\_Q6E OLBI\_Q7E OLBI\_Q8E  
/ORDER=VARIABLE.

## Frequências

### Observações

|                             |                                             |                                                                                                                                                                                                                |
|-----------------------------|---------------------------------------------|----------------------------------------------------------------------------------------------------------------------------------------------------------------------------------------------------------------|
| Saída criada                |                                             | 20-SEP-2020 11:29:18                                                                                                                                                                                           |
| Comentários                 |                                             |                                                                                                                                                                                                                |
| Entrada                     | Dados                                       | C:\Users\User\Documents\Pesquisa\Fellow\FellowGenData_V1.sav                                                                                                                                                   |
|                             | Conjunto de dados ativo                     | ConjuntodeDados1                                                                                                                                                                                               |
|                             | Filtro                                      | <none>                                                                                                                                                                                                         |
|                             | Ponderação                                  | <none>                                                                                                                                                                                                         |
|                             | Arquivo Dividido                            | <none>                                                                                                                                                                                                         |
|                             | N de linhas em arquivo de dados de trabalho | 1313                                                                                                                                                                                                           |
|                             |                                             |                                                                                                                                                                                                                |
| Tratamento de valor omissos | Definição de omissos                        | Os valores omissos definidos pelo usuário são tratados como omissos.                                                                                                                                           |
|                             | Casos utilizados                            | As estatísticas estão baseadas em todos os casos com dados válidos.                                                                                                                                            |
| Sintaxe                     |                                             | FREQUENCIES<br>VARIABLES=OLBI_Q1D<br>OLBI_Q2D OLBI_Q3D OLBI_Q4D<br>OLBI_Q5D OLBI_Q6D OLBI_Q7D<br>OLBI_Q8D<br>OLBI_Q1E OLBI_Q2E<br>OLBI_Q3E OLBI_Q4E OLBI_Q5E<br>OLBI_Q6E OLBI_Q7E OLBI_Q8E<br>/ORDER=VARIABLE. |
| Recursos                    | Tempo do processador                        | 00:00:00,02                                                                                                                                                                                                    |
|                             | Tempo decorrido                             | 00:00:00,02                                                                                                                                                                                                    |

Encontro com frequência assuntos novos e interessantes no meu trabalho (R)

### Estatísticas

Encontro com frequência assuntos novos e interessantes no meu trabalho (R)

|   |        |      |
|---|--------|------|
| N | Válido | 1313 |
|   | Omisso | 0    |

### Encontro com frequência assuntos novos e interessantes no meu trabalho (R)

|        |                            | Frequência | Porcentagem | Porcentagem válida | Porcentagem acumulativa |
|--------|----------------------------|------------|-------------|--------------------|-------------------------|
| Válido | Discordo totalmente        | 201        | 15,3        | 15,3               | 15,3                    |
|        | Discordo                   | 559        | 42,6        | 42,6               | 57,9                    |
|        | Nem concordo, nem discordo | 330        | 25,1        | 25,1               | 83,0                    |
|        | Concordo                   | 159        | 12,1        | 12,1               | 95,1                    |
|        | Concordo totalmente        | 64         | 4,9         | 4,9                | 100,0                   |
|        | Total                      | 1313       | 100,0       | 100,0              |                         |

Cada vez mais falo de forma negativa do meu trabalho

#### Estatísticas

Cada vez mais falo de forma negativa do meu trabalho

|   |        |      |
|---|--------|------|
| N | Válido | 1313 |
|   | Omisso | 0    |

### Cada vez mais falo de forma negativa do meu trabalho

|        |                            | Frequência | Porcentagem | Porcentagem válida | Porcentagem acumulativa |
|--------|----------------------------|------------|-------------|--------------------|-------------------------|
| Válido | Discordo totalmente        | 263        | 20,0        | 20,0               | 20,0                    |
|        | Discordo                   | 352        | 26,8        | 26,8               | 46,8                    |
|        | Nem concordo, nem discordo | 293        | 22,3        | 22,3               | 69,2                    |
|        | Concordo                   | 219        | 16,7        | 16,7               | 85,8                    |
|        | Concordo totalmente        | 186        | 14,2        | 14,2               | 100,0                   |
|        | Total                      | 1313       | 100,0       | 100,0              |                         |

Ultimamente tenho pensado menos no meu trabalho e faço as tarefas de forma quase mecânica

#### Estatísticas

Ultimamente tenho pensado menos no meu trabalho e faço as tarefas de forma quase mecânica

|   |        |      |
|---|--------|------|
| N | Válido | 1313 |
|   | Omisso | 0    |

## Ultimamente tenho pensado menos no meu trabalho e faço as tarefas de forma quase mecânica

|        |                            | Frequência | Porcentagem | Porcentagem válida | Porcentagem acumulativa |
|--------|----------------------------|------------|-------------|--------------------|-------------------------|
| Válido | Discordo totalmente        | 248        | 18,9        | 18,9               | 18,9                    |
|        | Discordo                   | 369        | 28,1        | 28,1               | 47,0                    |
|        | Nem concordo, nem discordo | 275        | 20,9        | 20,9               | 67,9                    |
|        | Concordo                   | 265        | 20,2        | 20,2               | 88,1                    |
|        | Concordo totalmente        | 156        | 11,9        | 11,9               | 100,0                   |
|        | Total                      | 1313       | 100,0       | 100,0              |                         |

Considero que o meu trabalho é um desafio positivo (R)

### Estatísticas

Considero que o meu trabalho é um  
desafio positivo (R)

|   |        |      |
|---|--------|------|
| N | Válido | 1313 |
|   | Omisso | 0    |

## Considero que o meu trabalho é um desafio positivo (R)

|        |                            | Frequência | Porcentagem | Porcentagem válida | Porcentagem acumulativa |
|--------|----------------------------|------------|-------------|--------------------|-------------------------|
| Válido | Discordo totalmente        | 316        | 24,1        | 24,1               | 24,1                    |
|        | Discordo                   | 542        | 41,3        | 41,3               | 65,3                    |
|        | Nem concordo, nem discordo | 296        | 22,5        | 22,5               | 87,9                    |
|        | Concordo                   | 111        | 8,5         | 8,5                | 96,3                    |
|        | Concordo totalmente        | 48         | 3,7         | 3,7                | 100,0                   |
|        | Total                      | 1313       | 100,0       | 100,0              |                         |

Com o passar do tempo, sinto-me desligado do meu trabalho

### Estatísticas

Com o passar do tempo, sinto-me  
desligado do meu trabalho

|   |        |      |
|---|--------|------|
| N | Válido | 1313 |
|   | Omisso | 0    |

### Com o passar do tempo, sinto-me desligado do meu trabalho

|        |                            | Frequência | Porcentagem | Porcentagem válida | Porcentagem acumulativa |
|--------|----------------------------|------------|-------------|--------------------|-------------------------|
| Válido | Discordo totalmente        | 346        | 26,4        | 26,4               | 26,4                    |
|        | Discordo                   | 369        | 28,1        | 28,1               | 54,5                    |
|        | Nem concordo, nem discordo | 289        | 22,0        | 22,0               | 76,5                    |
|        | Concordo                   | 211        | 16,1        | 16,1               | 92,5                    |
|        | Concordo totalmente        | 98         | 7,5         | 7,5                | 100,0                   |
|        | Total                      | 1313       | 100,0       | 100,0              |                         |

Às vezes, sinto-me farto das minhas tarefas no trabalho

### Estatísticas

Às vezes, sinto-me farto das minhas  
tarefas no trabalho

|   |        |      |
|---|--------|------|
| N | Válido | 1313 |
|   | Omisso | 0    |

### Às vezes, sinto-me farto das minhas tarefas no trabalho

|        |                            | Frequência | Porcentagem | Porcentagem válida | Porcentagem acumulativa |
|--------|----------------------------|------------|-------------|--------------------|-------------------------|
| Válido | Discordo totalmente        | 135        | 10,3        | 10,3               | 10,3                    |
|        | Discordo                   | 201        | 15,3        | 15,3               | 25,6                    |
|        | Nem concordo, nem discordo | 229        | 17,4        | 17,4               | 43,0                    |
|        | Concordo                   | 456        | 34,7        | 34,7               | 77,8                    |
|        | Concordo totalmente        | 292        | 22,2        | 22,2               | 100,0                   |
|        | Total                      | 1313       | 100,0       | 100,0              |                         |

Este é o único tipo de trabalho que me imagino a fazer (R)

### Estatísticas

Este é o único tipo de trabalho que me  
imagino a fazer (R)

|   |        |      |
|---|--------|------|
| N | Válido | 1313 |
|   | Omisso | 0    |

### Este é o único tipo de trabalho que me imagino a fazer (R)

|        |                            | Frequência | Porcentagem | Porcentagem válida | Porcentagem acumulativa |
|--------|----------------------------|------------|-------------|--------------------|-------------------------|
| Válido | Discordo totalmente        | 246        | 18,7        | 18,7               | 18,7                    |
|        | Discordo                   | 281        | 21,4        | 21,4               | 40,1                    |
|        | Nem concordo, nem discordo | 290        | 22,1        | 22,1               | 62,2                    |
|        | Concordo                   | 269        | 20,5        | 20,5               | 82,7                    |
|        | Concordo totalmente        | 227        | 17,3        | 17,3               | 100,0                   |
|        | Total                      | 1313       | 100,0       | 100,0              |                         |

Sinto-me cada vez mais empenhado no meu trabalho (R)

### Estatísticas

Sinto-me cada vez mais empenhado no meu trabalho (R)

|   |        |      |
|---|--------|------|
| N | Válido | 1313 |
|   | Omisso | 0    |

### Sinto-me cada vez mais empenhado no meu trabalho (R)

|        |                            | Frequência | Porcentagem | Porcentagem válida | Porcentagem acumulativa |
|--------|----------------------------|------------|-------------|--------------------|-------------------------|
| Válido | Discordo totalmente        | 124        | 9,4         | 9,4                | 9,4                     |
|        | Discordo                   | 325        | 24,8        | 24,8               | 34,2                    |
|        | Nem concordo, nem discordo | 452        | 34,4        | 34,4               | 68,6                    |
|        | Concordo                   | 274        | 20,9        | 20,9               | 89,5                    |
|        | Concordo totalmente        | 138        | 10,5        | 10,5               | 100,0                   |
|        | Total                      | 1313       | 100,0       | 100,0              |                         |

Há dias em que me sinto cansado antes mesmo de chegar ao trabalho

### Estatísticas

Há dias em que me sinto cansado antes mesmo de chegar ao trabalho

|   |        |      |
|---|--------|------|
| N | Válido | 1313 |
|   | Omisso | 0    |

### Há dias em que me sinto cansado antes mesmo de chegar ao trabalho

|        |                            | Frequência | Porcentagem | Porcentagem válida | Porcentagem acumulativa |
|--------|----------------------------|------------|-------------|--------------------|-------------------------|
| Válido | Discordo totalmente        | 48         | 3,7         | 3,7                | 3,7                     |
|        | Discordo                   | 99         | 7,5         | 7,5                | 11,2                    |
|        | Nem concordo, nem discordo | 123        | 9,4         | 9,4                | 20,6                    |
|        | Concordo                   | 492        | 37,5        | 37,5               | 58,0                    |
|        | Concordo totalmente        | 551        | 42,0        | 42,0               | 100,0                   |
|        | Total                      | 1313       | 100,0       | 100,0              |                         |

Depois do trabalho, preciso de mais tempo para relaxar e sentir-me melhor do que precisava antigamente

### Estatísticas

Depois do trabalho, preciso de mais  
tempo para relaxar e sentir-me melhor  
do que precisava antigamente

|   |        |      |
|---|--------|------|
| N | Válido | 1313 |
|   | Omisso | 0    |

### Depois do trabalho, preciso de mais tempo para relaxar e sentir-me melhor do que precisava antigamente

|        |                            | Frequência | Porcentagem | Porcentagem válida | Porcentagem acumulativa |
|--------|----------------------------|------------|-------------|--------------------|-------------------------|
| Válido | Discordo totalmente        | 51         | 3,9         | 3,9                | 3,9                     |
|        | Discordo                   | 104        | 7,9         | 7,9                | 11,8                    |
|        | Nem concordo, nem discordo | 153        | 11,7        | 11,7               | 23,5                    |
|        | Concordo                   | 444        | 33,8        | 33,8               | 57,3                    |
|        | Concordo totalmente        | 561        | 42,7        | 42,7               | 100,0                   |
|        | Total                      | 1313       | 100,0       | 100,0              |                         |

Consigo aguentar bem a pressão do meu trabalho (R)

### Estatísticas

Consigo aguentar bem a pressão do  
meu trabalho (R)

|   |        |      |
|---|--------|------|
| N | Válido | 1313 |
|   | Omisso | 0    |

### Consigo aguentar bem a pressão do meu trabalho (R)

|        |                            | Frequência | Porcentagem | Porcentagem válida | Porcentagem acumulativa |
|--------|----------------------------|------------|-------------|--------------------|-------------------------|
| Válido | Discordo totalmente        | 108        | 8,2         | 8,2                | 8,2                     |
|        | Discordo                   | 456        | 34,7        | 34,7               | 43,0                    |
|        | Nem concordo, nem discordo | 417        | 31,8        | 31,8               | 74,7                    |
|        | Concordo                   | 242        | 18,4        | 18,4               | 93,1                    |
|        | Concordo totalmente        | 90         | 6,9         | 6,9                | 100,0                   |
|        | Total                      | 1313       | 100,0       | 100,0              |                         |

Durante o meu trabalho, muitas vezes sinto-me emocionalmente esgotado

#### Estatísticas

Durante o meu trabalho, muitas vezes  
sinto-me emocionalmente esgotado

|   |        |      |
|---|--------|------|
| N | Válido | 1313 |
|   | Omisso | 0    |

### Durante o meu trabalho, muitas vezes sinto-me emocionalmente esgotado

|        |                            | Frequência | Porcentagem | Porcentagem válida | Porcentagem acumulativa |
|--------|----------------------------|------------|-------------|--------------------|-------------------------|
| Válido | Discordo totalmente        | 53         | 4,0         | 4,0                | 4,0                     |
|        | Discordo                   | 160        | 12,2        | 12,2               | 16,2                    |
|        | Nem concordo, nem discordo | 226        | 17,2        | 17,2               | 33,4                    |
|        | Concordo                   | 475        | 36,2        | 36,2               | 69,6                    |
|        | Concordo totalmente        | 399        | 30,4        | 30,4               | 100,0                   |
|        | Total                      | 1313       | 100,0       | 100,0              |                         |

Depois do trabalho, tenho energia suficiente para minhas atividades de lazer (R)

#### Estatísticas

Depois do trabalho, tenho energia  
suficiente para minhas atividades de  
lazer (R)

|   |        |      |
|---|--------|------|
| N | Válido | 1313 |
|   | Omisso | 0    |

**Depois do trabalho, tenho energia suficiente para minhas atividades de lazer (R)**

|        |                            | Frequência | Porcentagem | Porcentagem válida | Porcentagem acumulativa |
|--------|----------------------------|------------|-------------|--------------------|-------------------------|
| Válido | Discordo totalmente        | 40         | 3,0         | 3,0                | 3,0                     |
|        | Discordo                   | 158        | 12,0        | 12,0               | 15,1                    |
|        | Nem concordo, nem discordo | 247        | 18,8        | 18,8               | 33,9                    |
|        | Concordo                   | 536        | 40,8        | 40,8               | 74,7                    |
|        | Concordo totalmente        | 332        | 25,3        | 25,3               | 100,0                   |
|        | Total                      | 1313       | 100,0       | 100,0              |                         |

Depois do trabalho sinto-me cansado e sem energia

**Estatísticas**

Depois do trabalho sinto-me cansado e  
sem energia

|   |        |      |
|---|--------|------|
| N | Válido | 1313 |
|   | Omisso | 0    |

**Depois do trabalho sinto-me cansado e sem energia**

|        |                            | Frequência | Porcentagem | Porcentagem válida | Porcentagem acumulativa |
|--------|----------------------------|------------|-------------|--------------------|-------------------------|
| Válido | Discordo totalmente        | 59         | 4,5         | 4,5                | 4,5                     |
|        | Discordo                   | 129        | 9,8         | 9,8                | 14,3                    |
|        | Nem concordo, nem discordo | 183        | 13,9        | 13,9               | 28,3                    |
|        | Concordo                   | 477        | 36,3        | 36,3               | 64,6                    |
|        | Concordo totalmente        | 465        | 35,4        | 35,4               | 100,0                   |
|        | Total                      | 1313       | 100,0       | 100,0              |                         |

De uma forma geral, consigo administrar bem a quantidade de trabalho que tenho (R)

**Estatísticas**

De uma forma geral, consigo administrar  
bem a quantidade de trabalho que tenho  
(R)

|   |        |      |
|---|--------|------|
| N | Válido | 1313 |
|   | Omisso | 0    |

### De uma forma geral, consigo administrar bem a quantidade de trabalho que tenho (R)

|        |                            | Frequência | Porcentagem | Porcentagem válida | Porcentagem acumulativa |
|--------|----------------------------|------------|-------------|--------------------|-------------------------|
| Válido | Discordo totalmente        | 77         | 5,9         | 5,9                | 5,9                     |
|        | Discordo                   | 367        | 28,0        | 28,0               | 33,8                    |
|        | Nem concordo, nem discordo | 412        | 31,4        | 31,4               | 65,2                    |
|        | Concordo                   | 339        | 25,8        | 25,8               | 91,0                    |
|        | Concordo totalmente        | 118        | 9,0         | 9,0                | 100,0                   |
|        | Total                      | 1313       | 100,0       | 100,0              |                         |

Quando trabalho, geralmente sinto-me com energia (R)

### Estatísticas

Quando trabalho, geralmente sinto-me com energia (R)

|   |        |      |
|---|--------|------|
| N | Válido | 1032 |
|   | Omisso | 281  |

### Quando trabalho, geralmente sinto-me com energia (R)

|        |                            | Frequência | Porcentagem | Porcentagem válida | Porcentagem acumulativa |
|--------|----------------------------|------------|-------------|--------------------|-------------------------|
| Válido | Discordo totalmente        | 46         | 3,5         | 4,5                | 4,5                     |
|        | Discordo                   | 366        | 27,9        | 35,5               | 39,9                    |
|        | Nem concordo, nem discordo | 290        | 22,1        | 28,1               | 68,0                    |
|        | Concordo                   | 277        | 21,1        | 26,8               | 94,9                    |
|        | Concordo totalmente        | 53         | 4,0         | 5,1                | 100,0                   |
|        | Total                      | 1032       | 78,6        | 100,0              |                         |
| Omisso | Sistema                    | 281        | 21,4        |                    |                         |
| Total  |                            | 1313       | 100,0       |                    |                         |

### CROSSTABS

```

/TABLES=Sex Race ComorbAny HRiskFactor UnivHosp Autonomy_Classif PedagStr_Classif
PPEAvail_Classif Wkload_6060 Wkload_9090 ExternWork CovidCare BY DASS21_Classif_D2c
DASS21_Classif_A2c DASS21_Classif_S2c PHQ9_Classif BRCS_Classif OLBI_Classif_2c
/FORMAT=AVALUE TABLES
/STATISTICS=CHISQ PHI RISK
/CELLS=COUNT ROW TOTAL
/COUNT ROUND CELL.

```

**Observações**

|                            |                                             |                                                                                                                                                                                                                                                                                                                                                                                                            |
|----------------------------|---------------------------------------------|------------------------------------------------------------------------------------------------------------------------------------------------------------------------------------------------------------------------------------------------------------------------------------------------------------------------------------------------------------------------------------------------------------|
| Saída criada               |                                             | 20-SEP-2020 11:36:22                                                                                                                                                                                                                                                                                                                                                                                       |
| Comentários                |                                             |                                                                                                                                                                                                                                                                                                                                                                                                            |
| Entrada                    | Dados                                       | C:\Users\User\Documents\Pesquisa\Fellow\FellowGenData_V1.sav                                                                                                                                                                                                                                                                                                                                               |
|                            | Conjunto de dados ativo                     | ConjuntodeDados1                                                                                                                                                                                                                                                                                                                                                                                           |
|                            | Filtro                                      | <none>                                                                                                                                                                                                                                                                                                                                                                                                     |
|                            | Ponderação                                  | <none>                                                                                                                                                                                                                                                                                                                                                                                                     |
|                            | Arquivo Dividido                            | <none>                                                                                                                                                                                                                                                                                                                                                                                                     |
|                            | N de linhas em arquivo de dados de trabalho | 1313                                                                                                                                                                                                                                                                                                                                                                                                       |
| Tratamento de valor omisso | Definição de omisso                         | Os valores omissos definidos pelo usuário são tratados como omissos.                                                                                                                                                                                                                                                                                                                                       |
|                            | Casos utilizados                            | As estatísticas de cada tabela são baseadas em todos os casos com dados válidos na(s) amplitude(s) especificada(s) para todas as variáveis de cada tabela.                                                                                                                                                                                                                                                 |
| Sintaxe                    |                                             | CROSSTABS<br>/TABLES=Sex Race ComorbAny<br>HRiskFactor UnivHosp<br>Autonomy_Classif<br>PedagStr_Classif<br>PPEAvail_Classif<br>Wkload_6060 Wkload_9090<br>ExternWork CovidCare BY<br>DASS21_Classif_D2c<br>DASS21_Classif_A2c<br>DASS21_Classif_S2c<br>PHQ9_Classif BRCS_Classif<br>OLBI_Classif_2c<br>/FORMAT=AVALUE TABLES<br>/STATISTICS=CHISQ PHI RISK<br>/CELLS=COUNT ROW TOTAL<br>/COUNT ROUND CELL. |
| Recursos                   | Tempo do processador                        | 00:00:00,17                                                                                                                                                                                                                                                                                                                                                                                                |
|                            | Tempo decorrido                             | 00:00:00,15                                                                                                                                                                                                                                                                                                                                                                                                |
|                            | Dimensões solicitadas                       | 2                                                                                                                                                                                                                                                                                                                                                                                                          |
|                            | Células disponíveis                         | 524245                                                                                                                                                                                                                                                                                                                                                                                                     |

### Crosstab

DASS21 Classification - Depression  
(dichotomous)

|       |            |            | Normal | Abnormal<br>(elevated) | Total  |
|-------|------------|------------|--------|------------------------|--------|
| Sex   | Male       | Contagem   | 195    | 90                     | 285    |
|       |            | % em Sex   | 68,4%  | 31,6%                  | 100,0% |
|       |            | % do Total | 14,9%  | 6,9%                   | 21,8%  |
|       | Female     | Contagem   | 673    | 352                    | 1025   |
|       |            | % em Sex   | 65,7%  | 34,3%                  | 100,0% |
|       |            | % do Total | 51,4%  | 26,9%                  | 78,2%  |
| Total | Contagem   |            | 868    | 442                    | 1310   |
|       | % em Sex   |            | 66,3%  | 33,7%                  | 100,0% |
|       | % do Total |            | 66,3%  | 33,7%                  | 100,0% |

### Testes qui-quadrado

|                                       | Valor             | gl | Significância<br>Assintótica<br>(Bilateral) | Sig exata (2 lados) | Sig exata (1 lado) |
|---------------------------------------|-------------------|----|---------------------------------------------|---------------------|--------------------|
| Qui-quadrado de Pearson               | ,761 <sup>a</sup> | 1  | ,383                                        |                     |                    |
| Correção de continuidade <sup>b</sup> | ,643              | 1  | ,423                                        |                     |                    |
| Razão de verossimilhança              | ,767              | 1  | ,381                                        |                     |                    |
| Teste Exato de Fisher                 |                   |    |                                             | ,396                | ,212               |
| Associação Linear por Linear          | ,761              | 1  | ,383                                        |                     |                    |
| N de Casos Válidos                    | 1310              |    |                                             |                     |                    |

a. 0 células (,0%) esperavam uma contagem menor que 5. A contagem mínima esperada é 96,16.

b. Computado apenas para uma tabela 2x2

### Medidas Simétricas

|                     |             | Valor | Significância<br>Aproximada |
|---------------------|-------------|-------|-----------------------------|
| Nominal por Nominal | Fi          | ,024  | ,383                        |
|                     | V de Cramer | ,024  | ,383                        |
| N de Casos Válidos  |             | 1310  |                             |

### Estimativa de Risco

|                                              | Valor | Intervalo de confiança de 95% |          |
|----------------------------------------------|-------|-------------------------------|----------|
|                                              |       | Inferior                      | Superior |
| Razão de Chances para Sex<br>(Male / Female) | 1,133 | ,856                          | 1,501    |

|                                                                                         |       |      |       |
|-----------------------------------------------------------------------------------------|-------|------|-------|
| Para grupo DASS21 Classification<br>- Depression (dichotomous) =<br>Normal              | 1,042 | ,952 | 1,141 |
| Para grupo DASS21 Classification<br>- Depression (dichotomous) =<br>Abnormal (elevated) | ,920  | ,760 | 1,113 |
| N de Casos Válidos                                                                      | 1310  |      |       |

Sex \* DASS21 Classification - Anxiety (dichotomous)

### Crosstab

|     |        |            | DASS21 Classification - Anxiety<br>(dichotomous) |                        |        |
|-----|--------|------------|--------------------------------------------------|------------------------|--------|
|     |        |            | Normal                                           | Abnormal<br>(elevated) | Total  |
| Sex | Male   | Contagem   | 209                                              | 76                     | 285    |
|     |        | % em Sex   | 73,3%                                            | 26,7%                  | 100,0% |
|     |        | % do Total | 16,0%                                            | 5,8%                   | 21,8%  |
|     | Female | Contagem   | 649                                              | 376                    | 1025   |
|     |        | % em Sex   | 63,3%                                            | 36,7%                  | 100,0% |
|     |        | % do Total | 49,5%                                            | 28,7%                  | 78,2%  |
|     | Total  | Contagem   | 858                                              | 452                    | 1310   |
|     |        | % em Sex   | 65,5%                                            | 34,5%                  | 100,0% |
|     |        | % do Total | 65,5%                                            | 34,5%                  | 100,0% |

### Testes qui-quadrado

|                                       | Valor              | gl | Significância<br>Assintótica<br>(Bilateral) | Sig exata (2 lados) | Sig exata (1 lado) |
|---------------------------------------|--------------------|----|---------------------------------------------|---------------------|--------------------|
| Qui-quadrado de Pearson               | 9,900 <sup>a</sup> | 1  | ,002                                        |                     |                    |
| Correção de continuidade <sup>b</sup> | 9,462              | 1  | ,002                                        |                     |                    |
| Razão de verossimilhança              | 10,213             | 1  | ,001                                        |                     |                    |
| Teste Exato de Fisher                 |                    |    |                                             | ,002                | ,001               |
| Associação Linear por Linear          | 9,892              | 1  | ,002                                        |                     |                    |
| N de Casos Válidos                    | 1310               |    |                                             |                     |                    |

a. 0 células (,0%) esperavam uma contagem menor que 5. A contagem mínima esperada é 98,34.

b. Computado apenas para uma tabela 2x2

### Medidas Simétricas

|                     |             | Valor | Significância<br>Aproximada |
|---------------------|-------------|-------|-----------------------------|
| Nominal por Nominal | Fi          | ,087  | ,002                        |
|                     | V de Cramer | ,087  | ,002                        |
| N de Casos Válidos  |             | 1310  |                             |

### Estimativa de Risco

|                                                                                      | Valor | Intervalo de confiança de 95% |          |
|--------------------------------------------------------------------------------------|-------|-------------------------------|----------|
|                                                                                      |       | Inferior                      | Superior |
| Razão de Chances para Sex<br>(Male / Female)                                         | 1,593 | 1,190                         | 2,133    |
| Para grupo DASS21 Classification<br>- Anxiety (dichotomous) = Normal                 | 1,158 | 1,065                         | 1,260    |
| Para grupo DASS21 Classification<br>- Anxiety (dichotomous) =<br>Abnormal (elevated) | ,727  | ,590                          | ,896     |
| N de Casos Válidos                                                                   | 1310  |                               |          |

Sex \* DASS21 Classification - Stress (dichotomous)

### Crosstab

|       |            |            | DASS21 Classification - Stress<br>(dichotomous) |                        | Total  |
|-------|------------|------------|-------------------------------------------------|------------------------|--------|
|       |            |            | Normal                                          | Abnormal<br>(elevated) |        |
| Sex   | Male       | Contagem   | 236                                             | 49                     | 285    |
|       |            | % em Sex   | 82,8%                                           | 17,2%                  | 100,0% |
|       |            | % do Total | 18,0%                                           | 3,7%                   | 21,8%  |
|       | Female     | Contagem   | 773                                             | 252                    | 1025   |
|       |            | % em Sex   | 75,4%                                           | 24,6%                  | 100,0% |
|       |            | % do Total | 59,0%                                           | 19,2%                  | 78,2%  |
| Total | Contagem   |            | 1009                                            | 301                    | 1310   |
|       | % em Sex   |            | 77,0%                                           | 23,0%                  | 100,0% |
|       | % do Total |            | 77,0%                                           | 23,0%                  | 100,0% |

### Testes qui-quadrado

|                         | Valor              | gl | Significância<br>Assintótica<br>(Bilateral) | Sig exata (2 lados) | Sig exata (1 lado) |
|-------------------------|--------------------|----|---------------------------------------------|---------------------|--------------------|
| Qui-quadrado de Pearson | 6,886 <sup>a</sup> | 1  | ,009                                        |                     |                    |

|                                       |       |   |      |      |      |
|---------------------------------------|-------|---|------|------|------|
| Correção de continuidade <sup>b</sup> | 6,474 | 1 | ,011 |      |      |
| Razão de verossimilhança              | 7,232 | 1 | ,007 |      |      |
| Teste Exato de Fisher                 |       |   |      | ,009 | ,005 |
| Associação Linear por Linear          | 6,880 | 1 | ,009 |      |      |
| N de Casos Válidos                    | 1310  |   |      |      |      |

a. 0 células (,0%) esperavam uma contagem menor que 5. A contagem mínima esperada é 65,48.

b. Computado apenas para uma tabela 2x2

### Medidas Simétricas

|                     |             | Valor | Significância Aproximada |
|---------------------|-------------|-------|--------------------------|
| Nominal por Nominal | Fi          | ,073  | ,009                     |
|                     | V de Cramer | ,073  | ,009                     |
| N de Casos Válidos  |             | 1310  |                          |

### Estimativa de Risco

|                                                                               | Valor | Intervalo de confiança de 95% |          |
|-------------------------------------------------------------------------------|-------|-------------------------------|----------|
|                                                                               |       | Inferior                      | Superior |
| Razão de Chances para Sex (Male / Female)                                     | 1,570 | 1,119                         | 2,204    |
| Para grupo DASS21 Classification - Stress (dichotomous) = Normal              | 1,098 | 1,031                         | 1,170    |
| Para grupo DASS21 Classification - Stress (dichotomous) = Abnormal (elevated) | ,699  | ,530                          | ,922     |
| N de Casos Válidos                                                            | 1310  |                               |          |

Sex \* PHQ9 Depression Classification - Risk estimate for having current major depressive disorder

### Crosstab

PHQ9 Depression Classification - Risk estimate for having current major depressive disorder

|     |        |            | Low   | High  | Total  |
|-----|--------|------------|-------|-------|--------|
| Sex | Male   | Contagem   | 117   | 168   | 285    |
|     |        | % em Sex   | 41,1% | 58,9% | 100,0% |
|     |        | % do Total | 8,9%  | 12,8% | 21,8%  |
|     | Female | Contagem   | 311   | 714   | 1025   |
|     |        | % em Sex   | 30,3% | 69,7% | 100,0% |
|     |        | % do Total | 23,7% | 54,5% | 78,2%  |

|       |            |       |       |        |
|-------|------------|-------|-------|--------|
| Total | Contagem   | 428   | 882   | 1310   |
|       | % em Sex   | 32,7% | 67,3% | 100,0% |
|       | % do Total | 32,7% | 67,3% | 100,0% |

### Testes qui-quadrado

|                                       | Valor               | gl | Significância<br>Assintótica<br>(Bilateral) | Sig exata (2 lados) | Sig exata (1 lado) |
|---------------------------------------|---------------------|----|---------------------------------------------|---------------------|--------------------|
| Qui-quadrado de Pearson               | 11,631 <sup>a</sup> | 1  | ,001                                        |                     |                    |
| Correção de continuidade <sup>b</sup> | 11,149              | 1  | ,001                                        |                     |                    |
| Razão de verossimilhança              | 11,329              | 1  | ,001                                        |                     |                    |
| Teste Exato de Fisher                 |                     |    |                                             | ,001                | ,000               |
| Associação Linear por Linear          | 11,622              | 1  | ,001                                        |                     |                    |
| N de Casos Válidos                    | 1310                |    |                                             |                     |                    |

a. 0 células (,0%) esperavam uma contagem menor que 5. A contagem mínima esperada é 93,11.

b. Computado apenas para uma tabela 2x2

### Medidas Simétricas

|                     |             | Valor | Significância<br>Aproximada |
|---------------------|-------------|-------|-----------------------------|
| Nominal por Nominal | Fi          | ,094  | ,001                        |
|                     | V de Cramer | ,094  | ,001                        |
| N de Casos Válidos  |             | 1310  |                             |

### Estimativa de Risco

|                                                                                                                        | Valor | Intervalo de confiança de 95% |          |
|------------------------------------------------------------------------------------------------------------------------|-------|-------------------------------|----------|
|                                                                                                                        |       | Inferior                      | Superior |
| Razão de Chances para Sex<br>(Male / Female)                                                                           | 1,599 | 1,219                         | 2,097    |
| Para grupo PHQ9 Depression<br>Classification - Risk estimate for<br>having current major depressive<br>disorder = Low  | 1,353 | 1,145                         | 1,599    |
| Para grupo PHQ9 Depression<br>Classification - Risk estimate for<br>having current major depressive<br>disorder = High | ,846  | ,762                          | ,940     |
| N de Casos Válidos                                                                                                     | 1310  |                               |          |

### Crosstab

|       |            |            | BRCS Classification |                  |        |
|-------|------------|------------|---------------------|------------------|--------|
|       |            |            | Low resilience      | Moderate to High | Total  |
| Sex   | Male       | Contagem   | 172                 | 113              | 285    |
|       |            | % em Sex   | 60,4%               | 39,6%            | 100,0% |
|       |            | % do Total | 13,1%               | 8,6%             | 21,8%  |
|       | Female     | Contagem   | 639                 | 386              | 1025   |
|       |            | % em Sex   | 62,3%               | 37,7%            | 100,0% |
|       |            | % do Total | 48,8%               | 29,5%            | 78,2%  |
| Total | Contagem   | 811        | 499                 | 1310             |        |
|       | % em Sex   | 61,9%      | 38,1%               | 100,0%           |        |
|       | % do Total | 61,9%      | 38,1%               | 100,0%           |        |

### Testes qui-quadrado

|                                       | Valor             | gl | Significância<br>Assintótica<br>(Bilateral) | Sig exata (2 lados) | Sig exata (1 lado) |
|---------------------------------------|-------------------|----|---------------------------------------------|---------------------|--------------------|
| Qui-quadrado de Pearson               | ,375 <sup>a</sup> | 1  | ,540                                        |                     |                    |
| Correção de continuidade <sup>b</sup> | ,295              | 1  | ,587                                        |                     |                    |
| Razão de verossimilhança              | ,373              | 1  | ,541                                        |                     |                    |
| Teste Exato de Fisher                 |                   |    |                                             | ,581                | ,293               |
| Associação Linear por Linear          | ,374              | 1  | ,541                                        |                     |                    |
| N de Casos Válidos                    | 1310              |    |                                             |                     |                    |

a. 0 células (,0%) esperavam uma contagem menor que 5. A contagem mínima esperada é 108,56.

b. Computado apenas para uma tabela 2x2

### Medidas Simétricas

|                     |             | Valor | Significância<br>Aproximada |
|---------------------|-------------|-------|-----------------------------|
| Nominal por Nominal | Fi          | -,017 | ,540                        |
|                     | V de Cramer | ,017  | ,540                        |
| N de Casos Válidos  |             | 1310  |                             |

### Estimativa de Risco

|                                                    |      | Intervalo de confiança de 95% |          |
|----------------------------------------------------|------|-------------------------------|----------|
|                                                    |      | Inferior                      | Superior |
| Razão de Chances para Sex<br>(Male / Female)       | ,919 | ,703                          | 1,203    |
| Para grupo BRCS Classification =<br>Low resilience | ,968 | ,871                          | 1,076    |

|                                                   |       |      |       |
|---------------------------------------------------|-------|------|-------|
| Para grupo BRCS Classification = Moderate to High | 1,053 | ,894 | 1,240 |
| N de Casos Válidos                                | 1310  |      |       |

Sex \* OLBI Score Classification

### Crosstab

|     |        |            | OLBI Score Classification |       |        |
|-----|--------|------------|---------------------------|-------|--------|
|     |        |            | Low to Moderate           | High  | Total  |
| Sex | Male   | Contagem   | 191                       | 94    | 285    |
|     |        | % em Sex   | 67,0%                     | 33,0% | 100,0% |
|     |        | % do Total | 14,6%                     | 7,2%  | 21,8%  |
|     | Female | Contagem   | 683                       | 342   | 1025   |
|     |        | % em Sex   | 66,6%                     | 33,4% | 100,0% |
|     |        | % do Total | 52,1%                     | 26,1% | 78,2%  |
|     | Total  | Contagem   | 874                       | 436   | 1310   |
|     |        | % em Sex   | 66,7%                     | 33,3% | 100,0% |
|     |        | % do Total | 66,7%                     | 33,3% | 100,0% |

### Testes qui-quadrado

|                                       | Valor             | gl | Significância Assintótica (Bilateral) | Sig exata (2 lados) | Sig exata (1 lado) |
|---------------------------------------|-------------------|----|---------------------------------------|---------------------|--------------------|
| Qui-quadrado de Pearson               | ,015 <sup>a</sup> | 1  | ,903                                  |                     |                    |
| Correção de continuidade <sup>b</sup> | ,003              | 1  | ,960                                  |                     |                    |
| Razão de verossimilhança              | ,015              | 1  | ,903                                  |                     |                    |
| Teste Exato de Fisher                 |                   |    |                                       | ,943                | ,482               |
| Associação Linear por Linear          | ,015              | 1  | ,903                                  |                     |                    |
| N de Casos Válidos                    | 1310              |    |                                       |                     |                    |

a. 0 células (,0%) esperavam uma contagem menor que 5. A contagem mínima esperada é 94,85.

b. Computado apenas para uma tabela 2x2

### Medidas Simétricas

|                     |             | Valor | Significância Aproximada |
|---------------------|-------------|-------|--------------------------|
| Nominal por Nominal | Fi          | ,003  | ,903                     |
|                     | V de Cramer | ,003  | ,903                     |
| N de Casos Válidos  |             | 1310  |                          |

### Estimativa de Risco

|                                                           | Valor | Intervalo de confiança de 95% |          |
|-----------------------------------------------------------|-------|-------------------------------|----------|
|                                                           |       | Inferior                      | Superior |
| Razão de Chances para Sex<br>(Male / Female)              | 1,017 | ,770                          | 1,345    |
| Para grupo OLBI Score<br>Classification = Low to Moderate | 1,006 | ,917                          | 1,103    |
| Para grupo OLBI Score<br>Classification = High            | ,989  | ,820                          | 1,191    |
| N de Casos Válidos                                        | 1310  |                               |          |

Race \* DASS21 Classification - Depression (dichotomous)

### Crosstab

DASS21 Classification - Depression  
(dichotomous)

|       |            |            | Normal | Abnormal<br>(elevated) | Total  |
|-------|------------|------------|--------|------------------------|--------|
| Race  | White      | Contagem   | 531    | 247                    | 778    |
|       |            | % em Race  | 68,3%  | 31,7%                  | 100,0% |
|       |            | % do Total | 40,4%  | 18,8%                  | 59,3%  |
|       | Pardo      | Contagem   | 276    | 157                    | 433    |
|       |            | % em Race  | 63,7%  | 36,3%                  | 100,0% |
|       |            | % do Total | 21,0%  | 12,0%                  | 33,0%  |
|       | Black      | Contagem   | 52     | 29                     | 81     |
|       |            | % em Race  | 64,2%  | 35,8%                  | 100,0% |
|       |            | % do Total | 4,0%   | 2,2%                   | 6,2%   |
|       | Other      | Contagem   | 11     | 10                     | 21     |
|       |            | % em Race  | 52,4%  | 47,6%                  | 100,0% |
|       |            | % do Total | 0,8%   | 0,8%                   | 1,6%   |
| Total | Contagem   | 870        | 443    | 1313                   |        |
|       | % em Race  | 66,3%      | 33,7%  | 100,0%                 |        |
|       | % do Total | 66,3%      | 33,7%  | 100,0%                 |        |

### Testes qui-quadrado

|                              | Valor              | gl | Significância<br>Assintótica<br>(Bilateral) |
|------------------------------|--------------------|----|---------------------------------------------|
| Qui-quadrado de Pearson      | 4,573 <sup>a</sup> | 3  | ,206                                        |
| Razão de verossimilhança     | 4,482              | 3  | ,214                                        |
| Associação Linear por Linear | 3,835              | 1  | ,050                                        |
| N de Casos Válidos           | 1313               |    |                                             |

a. 0 células (,0%) esperavam uma contagem menor que 5. A contagem mínima esperada é 7,09.

Medidas Simétricas

|                     |             | Valor | Significância Aproximada |
|---------------------|-------------|-------|--------------------------|
| Nominal por Nominal | Fi          | ,059  | ,206                     |
|                     | V de Cramer | ,059  | ,206                     |
| N de Casos Válidos  |             | 1313  |                          |

Estimativa de Risco

|                                            | Valor |
|--------------------------------------------|-------|
| Razão de Chances para Race (White / Pardo) | a     |

a. Não é possível calcular as estatísticas de Estimativa de Risco. Elas são computadas apenas para uma tabela 2\*2 sem células vazias.

Race \* DASS21 Classification - Anxiety (dichotomous)

Crosstab

|       |            |            | DASS21 Classification - Anxiety (dichotomous) |                     |        |
|-------|------------|------------|-----------------------------------------------|---------------------|--------|
|       |            |            | Normal                                        | Abnormal (elevated) | Total  |
| Race  | White      | Contagem   | 521                                           | 257                 | 778    |
|       |            | % em Race  | 67,0%                                         | 33,0%               | 100,0% |
|       |            | % do Total | 39,7%                                         | 19,6%               | 59,3%  |
|       | Pardo      | Contagem   | 275                                           | 158                 | 433    |
|       |            | % em Race  | 63,5%                                         | 36,5%               | 100,0% |
|       |            | % do Total | 20,9%                                         | 12,0%               | 33,0%  |
|       | Black      | Contagem   | 49                                            | 32                  | 81     |
|       |            | % em Race  | 60,5%                                         | 39,5%               | 100,0% |
|       |            | % do Total | 3,7%                                          | 2,4%                | 6,2%   |
|       | Other      | Contagem   | 16                                            | 5                   | 21     |
|       |            | % em Race  | 76,2%                                         | 23,8%               | 100,0% |
|       |            | % do Total | 1,2%                                          | 0,4%                | 1,6%   |
| Total | Contagem   |            | 861                                           | 452                 | 1313   |
|       | % em Race  |            | 65,6%                                         | 34,4%               | 100,0% |
|       | % do Total |            | 65,6%                                         | 34,4%               | 100,0% |

### Testes qui-quadrado

|                              | Valor              | gl | Significância<br>Assintótica<br>(Bilateral) |
|------------------------------|--------------------|----|---------------------------------------------|
| Qui-quadrado de Pearson      | 3,460 <sup>a</sup> | 3  | ,326                                        |
| Razão de verossimilhança     | 3,504              | 3  | ,320                                        |
| Associação Linear por Linear | ,789               | 1  | ,374                                        |
| N de Casos Válidos           | 1313               |    |                                             |

a. 0 células (,0%) esperavam uma contagem menor que 5. A contagem mínima esperada é 7,23.

### Medidas Simétricas

|                     |             | Valor | Significância<br>Aproximada |
|---------------------|-------------|-------|-----------------------------|
| Nominal por Nominal | Fi          | ,051  | ,326                        |
|                     | V de Cramer | ,051  | ,326                        |
| N de Casos Válidos  |             | 1313  |                             |

### Estimativa de Risco

|                                               | Valor        |
|-----------------------------------------------|--------------|
| Razão de Chances para Race<br>(White / Pardo) | <sup>a</sup> |

a. Não é possível calcular as estatísticas de Estimativa de Risco. Elas são computadas apenas para uma tabela 2\*2 sem células vazias.

Race \* DASS21 Classification - Stress (dichotomous)

### Crosstab

|      |       |            | DASS21 Classification - Stress<br>(dichotomous) |                        |        |
|------|-------|------------|-------------------------------------------------|------------------------|--------|
|      |       |            | Normal                                          | Abnormal<br>(elevated) | Total  |
| Race | White | Contagem   | 606                                             | 172                    | 778    |
|      |       | % em Race  | 77,9%                                           | 22,1%                  | 100,0% |
|      |       | % do Total | 46,2%                                           | 13,1%                  | 59,3%  |
|      | Pardo | Contagem   | 328                                             | 105                    | 433    |
|      |       | % em Race  | 75,8%                                           | 24,2%                  | 100,0% |

|       |            |       |       |        |
|-------|------------|-------|-------|--------|
|       | % do Total | 25,0% | 8,0%  | 33,0%  |
| Black | Contagem   | 61    | 20    | 81     |
|       | % em Race  | 75,3% | 24,7% | 100,0% |
|       | % do Total | 4,6%  | 1,5%  | 6,2%   |
| Other | Contagem   | 17    | 4     | 21     |
|       | % em Race  | 81,0% | 19,0% | 100,0% |
|       | % do Total | 1,3%  | 0,3%  | 1,6%   |
| Total | Contagem   | 1012  | 301   | 1313   |
|       | % em Race  | 77,1% | 22,9% | 100,0% |
|       | % do Total | 77,1% | 22,9% | 100,0% |

### Testes qui-quadrado

|                              | Valor              | gl | Significância<br>Assintótica<br>(Bilateral) |
|------------------------------|--------------------|----|---------------------------------------------|
| Qui-quadrado de Pearson      | 1,045 <sup>a</sup> | 3  | ,790                                        |
| Razão de verossimilhança     | 1,048              | 3  | ,790                                        |
| Associação Linear por Linear | ,348               | 1  | ,555                                        |
| N de Casos Válidos           | 1313               |    |                                             |

a. 1 células (12,5%) esperavam uma contagem menor que 5. A contagem mínima esperada é 4,81.

### Medidas Simétricas

|                     |             | Valor | Significância<br>Aproximada |
|---------------------|-------------|-------|-----------------------------|
| Nominal por Nominal | Fi          | ,028  | ,790                        |
|                     | V de Cramer | ,028  | ,790                        |
| N de Casos Válidos  |             | 1313  |                             |

### Estimativa de Risco

|                                               | Valor        |
|-----------------------------------------------|--------------|
| Razão de Chances para Race<br>(White / Pardo) | <sup>a</sup> |

a. Não é possível calcular as estatísticas de Estimativa de Risco. Elas são computadas apenas para uma tabela 2\*2 sem células vazias.

Race \* PHQ9 Depression Classification - Risk estimate for having current major depressive disorder

### Crosstab

PHQ9 Depression Classification - Risk  
estimate for having current major  
depressive disorder

|       |       | Low        |       | High  | Total  |
|-------|-------|------------|-------|-------|--------|
| Race  | White | Contagem   | 247   | 531   | 778    |
|       |       | % em Race  | 31,7% | 68,3% | 100,0% |
|       |       | % do Total | 18,8% | 40,4% | 59,3%  |
|       | Pardo | Contagem   | 145   | 288   | 433    |
|       |       | % em Race  | 33,5% | 66,5% | 100,0% |
|       |       | % do Total | 11,0% | 21,9% | 33,0%  |
|       | Black | Contagem   | 31    | 50    | 81     |
|       |       | % em Race  | 38,3% | 61,7% | 100,0% |
|       |       | % do Total | 2,4%  | 3,8%  | 6,2%   |
|       | Other | Contagem   | 6     | 15    | 21     |
|       |       | % em Race  | 28,6% | 71,4% | 100,0% |
|       |       | % do Total | 0,5%  | 1,1%  | 1,6%   |
| Total |       | Contagem   | 429   | 884   | 1313   |
|       |       | % em Race  | 32,7% | 67,3% | 100,0% |
|       |       | % do Total | 32,7% | 67,3% | 100,0% |

### Testes qui-quadrado

|                              | Valor              | gl | Significância<br>Assintótica<br>(Bilateral) |
|------------------------------|--------------------|----|---------------------------------------------|
| Qui-quadrado de Pearson      | 1,748 <sup>a</sup> | 3  | ,626                                        |
| Razão de verossimilhança     | 1,723              | 3  | ,632                                        |
| Associação Linear por Linear | ,739               | 1  | ,390                                        |
| N de Casos Válidos           | 1313               |    |                                             |

a. 0 células (,0%) esperavam uma contagem menor que 5. A contagem mínima esperada é 6,86.

### Medidas Simétricas

|                     |             | Valor | Significância<br>Aproximada |
|---------------------|-------------|-------|-----------------------------|
| Nominal por Nominal | Fi          | ,036  | ,626                        |
|                     | V de Cramer | ,036  | ,626                        |
| N de Casos Válidos  |             | 1313  |                             |

### Estimativa de Risco

Valor

|                                               |              |
|-----------------------------------------------|--------------|
| Razão de Chances para Race<br>(White / Pardo) | <sup>a</sup> |
|-----------------------------------------------|--------------|

a. Não é possível calcular as estatísticas de Estimativa de Risco. Elas são computadas apenas para uma tabela 2\*2 sem células vazias.

Race \* BRCS Classification

### Crosstab

|       |            |            | BRCS Classification |                  |        |
|-------|------------|------------|---------------------|------------------|--------|
|       |            |            | Low resilience      | Moderate to High | Total  |
| Race  | White      | Contagem   | 479                 | 299              | 778    |
|       |            | % em Race  | 61,6%               | 38,4%            | 100,0% |
|       |            | % do Total | 36,5%               | 22,8%            | 59,3%  |
|       | Pardo      | Contagem   | 268                 | 165              | 433    |
|       |            | % em Race  | 61,9%               | 38,1%            | 100,0% |
|       |            | % do Total | 20,4%               | 12,6%            | 33,0%  |
|       | Black      | Contagem   | 50                  | 31               | 81     |
|       |            | % em Race  | 61,7%               | 38,3%            | 100,0% |
|       |            | % do Total | 3,8%                | 2,4%             | 6,2%   |
|       | Other      | Contagem   | 16                  | 5                | 21     |
|       |            | % em Race  | 76,2%               | 23,8%            | 100,0% |
|       |            | % do Total | 1,2%                | 0,4%             | 1,6%   |
| Total | Contagem   | 813        | 500                 | 1313             |        |
|       | % em Race  | 61,9%      | 38,1%               | 100,0%           |        |
|       | % do Total | 61,9%      | 38,1%               | 100,0%           |        |

### Testes qui-quadrado

|                              | Valor              | gl | Significância<br>Assintótica<br>(Bilateral) |
|------------------------------|--------------------|----|---------------------------------------------|
| Qui-quadrado de Pearson      | 1,856 <sup>a</sup> | 3  | ,603                                        |
| Razão de verossimilhança     | 1,983              | 3  | ,576                                        |
| Associação Linear por Linear | ,505               | 1  | ,477                                        |
| N de Casos Válidos           | 1313               |    |                                             |

a. 0 células (,0%) esperavam uma contagem menor que 5. A contagem mínima esperada é 8,00.

### Medidas Simétricas

|                     |             | Valor | Significância<br>Aproximada |
|---------------------|-------------|-------|-----------------------------|
| Nominal por Nominal | Fi          | ,038  | ,603                        |
|                     | V de Cramer | ,038  | ,603                        |
| N de Casos Válidos  |             | 1313  |                             |

### Estimativa de Risco

|                                               | Valor |
|-----------------------------------------------|-------|
| Razão de Chances para Race<br>(White / Pardo) | a     |

a. Não é possível calcular as estatísticas de Estimativa de Risco. Elas são computadas apenas para uma tabela 2\*2 sem células vazias.

Race \* OLBI Score Classification

### Crosstab

|       |       |            | OLBI Score Classification |       |        |
|-------|-------|------------|---------------------------|-------|--------|
|       |       |            | Low to Moderate           | High  | Total  |
| Race  | White | Contagem   | 499                       | 279   | 778    |
|       |       | % em Race  | 64,1%                     | 35,9% | 100,0% |
|       |       | % do Total | 38,0%                     | 21,2% | 59,3%  |
|       | Pardo | Contagem   | 305                       | 128   | 433    |
|       |       | % em Race  | 70,4%                     | 29,6% | 100,0% |
|       |       | % do Total | 23,2%                     | 9,7%  | 33,0%  |
|       | Black | Contagem   | 58                        | 23    | 81     |
|       |       | % em Race  | 71,6%                     | 28,4% | 100,0% |
|       |       | % do Total | 4,4%                      | 1,8%  | 6,2%   |
|       | Other | Contagem   | 13                        | 8     | 21     |
|       |       | % em Race  | 61,9%                     | 38,1% | 100,0% |
|       |       | % do Total | 1,0%                      | 0,6%  | 1,6%   |
| Total |       | Contagem   | 875                       | 438   | 1313   |
|       |       | % em Race  | 66,6%                     | 33,4% | 100,0% |
|       |       | % do Total | 66,6%                     | 33,4% | 100,0% |

### Testes qui-quadrado

|                         | Valor              | gl | Significância<br>Assintótica<br>(Bilateral) |
|-------------------------|--------------------|----|---------------------------------------------|
| Qui-quadrado de Pearson | 6,110 <sup>a</sup> | 3  | ,106                                        |

|                              |       |   |      |
|------------------------------|-------|---|------|
| Razão de verossimilhança     | 6,163 | 3 | ,104 |
| Associação Linear por Linear | 3,372 | 1 | ,066 |
| N de Casos Válidos           | 1313  |   |      |

a. 0 células (,0%) esperavam uma contagem menor que 5. A contagem mínima esperada é 7,01.

### Medidas Simétricas

|                     |             | Valor | Significância Aproximada |
|---------------------|-------------|-------|--------------------------|
| Nominal por Nominal | Fi          | ,068  | ,106                     |
|                     | V de Cramer | ,068  | ,106                     |
| N de Casos Válidos  |             | 1313  |                          |

### Estimativa de Risco

|                                            | Valor |
|--------------------------------------------|-------|
| Razão de Chances para Race (White / Pardo) | a     |

a. Não é possível calcular as estatísticas de Estimativa de Risco. Elas são computadas apenas para uma tabela 2\*2 sem células vazias.

Any comorbidity (regardless COVID risk) \* DASS21 Classification - Depression (dichotomous)

### Crosstab

|                                         |                                              |                                              | DASS21 Classification - Depression (dichotomous) |                     | Total  |
|-----------------------------------------|----------------------------------------------|----------------------------------------------|--------------------------------------------------|---------------------|--------|
|                                         |                                              |                                              | Normal                                           | Abnormal (elevated) |        |
| Any comorbidity (regardless COVID risk) | No                                           | Contagem                                     | 750                                              | 321                 | 1071   |
|                                         |                                              | % em Any comorbidity (regardless COVID risk) | 70,0%                                            | 30,0%               | 100,0% |
|                                         |                                              | % do Total                                   | 57,5%                                            | 24,6%               | 82,1%  |
|                                         | Yes                                          | Contagem                                     | 115                                              | 119                 | 234    |
|                                         |                                              | % em Any comorbidity (regardless COVID risk) | 49,1%                                            | 50,9%               | 100,0% |
|                                         |                                              | % do Total                                   | 8,8%                                             | 9,1%                | 17,9%  |
| Total                                   | Contagem                                     |                                              | 865                                              | 440                 | 1305   |
|                                         | % em Any comorbidity (regardless COVID risk) |                                              | 66,3%                                            | 33,7%               | 100,0% |
|                                         | % do Total                                   |                                              | 66,3%                                            | 33,7%               | 100,0% |

### Testes qui-quadrado

|                                       | Valor               | gl | Significância<br>Assintótica<br>(Bilateral) | Sig exata (2 lados) | Sig exata (1 lado) |
|---------------------------------------|---------------------|----|---------------------------------------------|---------------------|--------------------|
| Qui-quadrado de Pearson               | 37,473 <sup>a</sup> | 1  | ,000                                        |                     |                    |
| Correção de continuidade <sup>b</sup> | 36,545              | 1  | ,000                                        |                     |                    |
| Razão de verossimilhança              | 35,860              | 1  | ,000                                        |                     |                    |
| Teste Exato de Fisher                 |                     |    |                                             | ,000                | ,000               |
| Associação Linear por Linear          | 37,444              | 1  | ,000                                        |                     |                    |
| N de Casos Válidos                    | 1305                |    |                                             |                     |                    |

a. 0 células (,0%) esperavam uma contagem menor que 5. A contagem mínima esperada é 78,90.

b. Computado apenas para uma tabela 2x2

### Medidas Simétricas

|                     |             | Valor | Significância<br>Aproximada |
|---------------------|-------------|-------|-----------------------------|
| Nominal por Nominal | Fi          | ,169  | ,000                        |
|                     | V de Cramer | ,169  | ,000                        |
| N de Casos Válidos  |             | 1305  |                             |

### Estimativa de Risco

|                                                                                   | Valor | Intervalo de confiança de 95% |          |
|-----------------------------------------------------------------------------------|-------|-------------------------------|----------|
|                                                                                   |       | Inferior                      | Superior |
| Razão de Chances para Any comorbidity (regardless COVID risk) (No / Yes)          | 2,418 | 1,813                         | 3,224    |
| Para grupo DASS21 Classification - Depression (dichotomous) = Normal              | 1,425 | 1,244                         | 1,633    |
| Para grupo DASS21 Classification - Depression (dichotomous) = Abnormal (elevated) | ,589  | ,504                          | ,689     |
| N de Casos Válidos                                                                | 1305  |                               |          |

Any comorbidity (regardless COVID risk) \* DASS21 Classification - Anxiety (dichotomous)

### Crosstab

|                                         |                                                 |                                                 | DASS21 Classification - Anxiety<br>(dichotomous) |                        | Total  |
|-----------------------------------------|-------------------------------------------------|-------------------------------------------------|--------------------------------------------------|------------------------|--------|
|                                         |                                                 |                                                 | Normal                                           | Abnormal<br>(elevated) |        |
| Any comorbidity (regardless COVID risk) | No                                              | Contagem                                        | 732                                              | 339                    | 1071   |
|                                         |                                                 | % em Any comorbidity<br>(regardless COVID risk) | 68,3%                                            | 31,7%                  | 100,0% |
|                                         |                                                 | % do Total                                      | 56,1%                                            | 26,0%                  | 82,1%  |
|                                         | Yes                                             | Contagem                                        | 125                                              | 109                    | 234    |
|                                         |                                                 | % em Any comorbidity<br>(regardless COVID risk) | 53,4%                                            | 46,6%                  | 100,0% |
|                                         |                                                 | % do Total                                      | 9,6%                                             | 8,4%                   | 17,9%  |
| Total                                   | Contagem                                        |                                                 | 857                                              | 448                    | 1305   |
|                                         | % em Any comorbidity<br>(regardless COVID risk) |                                                 | 65,7%                                            | 34,3%                  | 100,0% |
|                                         | % do Total                                      |                                                 | 65,7%                                            | 34,3%                  | 100,0% |

### Testes qui-quadrado

|                                       | Valor               | gl | Significância<br>Assintótica<br>(Bilateral) | Sig exata (2 lados) | Sig exata (1 lado) |
|---------------------------------------|---------------------|----|---------------------------------------------|---------------------|--------------------|
| Qui-quadrado de Pearson               | 18,984 <sup>a</sup> | 1  | ,000                                        |                     |                    |
| Correção de continuidade <sup>b</sup> | 18,328              | 1  | ,000                                        |                     |                    |
| Razão de verossimilhança              | 18,359              | 1  | ,000                                        |                     |                    |
| Teste Exato de Fisher                 |                     |    |                                             | ,000                | ,000               |
| Associação Linear por Linear          | 18,970              | 1  | ,000                                        |                     |                    |
| N de Casos Válidos                    | 1305                |    |                                             |                     |                    |

a. 0 células (,0%) esperavam uma contagem menor que 5. A contagem mínima esperada é 80,33.

b. Computado apenas para uma tabela 2x2

### Medidas Simétricas

|                     |             | Valor | Significância<br>Aproximada |
|---------------------|-------------|-------|-----------------------------|
| Nominal por Nominal | Fi          | ,121  | ,000                        |
|                     | V de Cramer | ,121  | ,000                        |
| N de Casos Válidos  |             | 1305  |                             |

### Estimativa de Risco

|                                                                          | Valor | Intervalo de confiança de 95% |          |
|--------------------------------------------------------------------------|-------|-------------------------------|----------|
|                                                                          |       | Inferior                      | Superior |
| Razão de Chances para Any comorbidity (regardless COVID risk) (No / Yes) | 1,883 | 1,413                         | 2,510    |

|                                                                                      |       |       |       |
|--------------------------------------------------------------------------------------|-------|-------|-------|
| Para grupo DASS21 Classification<br>- Anxiety (dichotomous) = Normal                 | 1,279 | 1,128 | 1,452 |
| Para grupo DASS21 Classification<br>- Anxiety (dichotomous) =<br>Abnormal (elevated) | ,680  | ,577  | ,800  |
| N de Casos Válidos                                                                   | 1305  |       |       |

Any comorbidity (regardless COVID risk) \* DASS21 Classification - Stress (dichotomous)

### Crosstab

|                                            |                                                 |                                                 | DASS21 Classification - Stress<br>(dichotomous) |                        | Total  |
|--------------------------------------------|-------------------------------------------------|-------------------------------------------------|-------------------------------------------------|------------------------|--------|
|                                            |                                                 |                                                 | Normal                                          | Abnormal<br>(elevated) |        |
| Any comorbidity (regardless<br>COVID risk) | No                                              | Contagem                                        | 838                                             | 233                    | 1071   |
|                                            |                                                 | % em Any comorbidity<br>(regardless COVID risk) | 78,2%                                           | 21,8%                  | 100,0% |
|                                            |                                                 | % do Total                                      | 64,2%                                           | 17,9%                  | 82,1%  |
|                                            | Yes                                             | Contagem                                        | 169                                             | 65                     | 234    |
|                                            |                                                 | % em Any comorbidity<br>(regardless COVID risk) | 72,2%                                           | 27,8%                  | 100,0% |
|                                            |                                                 | % do Total                                      | 13,0%                                           | 5,0%                   | 17,9%  |
| Total                                      | Contagem                                        |                                                 | 1007                                            | 298                    | 1305   |
|                                            | % em Any comorbidity<br>(regardless COVID risk) |                                                 | 77,2%                                           | 22,8%                  | 100,0% |
|                                            | % do Total                                      |                                                 | 77,2%                                           | 22,8%                  | 100,0% |

### Testes qui-quadrado

|                                       | Valor              | gl | Significância<br>Assintótica<br>(Bilateral) | Sig exata (2 lados) | Sig exata (1 lado) |
|---------------------------------------|--------------------|----|---------------------------------------------|---------------------|--------------------|
| Qui-quadrado de Pearson               | 3,953 <sup>a</sup> | 1  | ,047                                        |                     |                    |
| Correção de continuidade <sup>b</sup> | 3,618              | 1  | ,057                                        |                     |                    |
| Razão de verossimilhança              | 3,814              | 1  | ,051                                        |                     |                    |
| Teste Exato de Fisher                 |                    |    |                                             | ,048                | ,030               |
| Associação Linear por Linear          | 3,950              | 1  | ,047                                        |                     |                    |
| N de Casos Válidos                    | 1305               |    |                                             |                     |                    |

a. 0 células (,0%) esperavam uma contagem menor que 5. A contagem mínima esperada é 53,43.

b. Computado apenas para uma tabela 2x2

## Medidas Simétricas

|                     |             | Valor | Significância Aproximada |
|---------------------|-------------|-------|--------------------------|
| Nominal por Nominal | Fi          | ,055  | ,047                     |
|                     | V de Cramer | ,055  | ,047                     |
| N de Casos Válidos  |             | 1305  |                          |

## Estimativa de Risco

|                                                                               | Valor | Intervalo de confiança de 95% |          |
|-------------------------------------------------------------------------------|-------|-------------------------------|----------|
|                                                                               |       | Inferior                      | Superior |
| Razão de Chances para Any comorbidity (regardless COVID risk) (No / Yes)      | 1,383 | 1,004                         | 1,906    |
| Para grupo DASS21 Classification - Stress (dichotomous) = Normal              | 1,083 | ,995                          | 1,180    |
| Para grupo DASS21 Classification - Stress (dichotomous) = Abnormal (elevated) | ,783  | ,619                          | ,991     |
| N de Casos Válidos                                                            | 1305  |                               |          |

Any comorbidity (regardless COVID risk) \* PHQ9 Depression Classification - Risk estimate for having current major depressive disorder

## Crosstab

|                                         |                                              |                                              | PHQ9 Depression Classification - Risk estimate for having current major depressive disorder |       | Total  |
|-----------------------------------------|----------------------------------------------|----------------------------------------------|---------------------------------------------------------------------------------------------|-------|--------|
|                                         |                                              |                                              | Low                                                                                         | High  |        |
| Any comorbidity (regardless COVID risk) | No                                           | Contagem                                     | 383                                                                                         | 688   | 1071   |
|                                         |                                              | % em Any comorbidity (regardless COVID risk) | 35,8%                                                                                       | 64,2% | 100,0% |
|                                         |                                              | % do Total                                   | 29,3%                                                                                       | 52,7% | 82,1%  |
|                                         | Yes                                          | Contagem                                     | 45                                                                                          | 189   | 234    |
|                                         |                                              | % em Any comorbidity (regardless COVID risk) | 19,2%                                                                                       | 80,8% | 100,0% |
|                                         |                                              | % do Total                                   | 3,4%                                                                                        | 14,5% | 17,9%  |
| Total                                   | Contagem                                     |                                              | 428                                                                                         | 877   | 1305   |
|                                         | % em Any comorbidity (regardless COVID risk) |                                              | 32,8%                                                                                       | 67,2% | 100,0% |
|                                         | % do Total                                   |                                              | 32,8%                                                                                       | 67,2% | 100,0% |

### Testes qui-quadrado

|                                       | Valor               | gl | Significância Assintótica (Bilateral) | Sig exata (2 lados) | Sig exata (1 lado) |
|---------------------------------------|---------------------|----|---------------------------------------|---------------------|--------------------|
| Qui-quadrado de Pearson               | 23,808 <sup>a</sup> | 1  | ,000                                  |                     |                    |
| Correção de continuidade <sup>b</sup> | 23,064              | 1  | ,000                                  |                     |                    |
| Razão de verossimilhança              | 25,669              | 1  | ,000                                  |                     |                    |
| Teste Exato de Fisher                 |                     |    |                                       | ,000                | ,000               |
| Associação Linear por Linear          | 23,790              | 1  | ,000                                  |                     |                    |
| N de Casos Válidos                    | 1305                |    |                                       |                     |                    |

a. 0 células (,0%) esperavam uma contagem menor que 5. A contagem mínima esperada é 76,74.

b. Computado apenas para uma tabela 2x2

### Medidas Simétricas

|                     |             | Valor | Significância Aproximada |
|---------------------|-------------|-------|--------------------------|
| Nominal por Nominal | Fi          | ,135  | ,000                     |
|                     | V de Cramer | ,135  | ,000                     |
| N de Casos Válidos  |             | 1305  |                          |

### Estimativa de Risco

|                                                                                                               | Valor | Intervalo de confiança de 95% |          |
|---------------------------------------------------------------------------------------------------------------|-------|-------------------------------|----------|
|                                                                                                               |       | Inferior                      | Superior |
| Razão de Chances para Any comorbidity (regardless COVID risk) (No / Yes)                                      | 2,338 | 1,650                         | 3,312    |
| Para grupo PHQ9 Depression Classification - Risk estimate for having current major depressive disorder = Low  | 1,860 | 1,413                         | 2,447    |
| Para grupo PHQ9 Depression Classification - Risk estimate for having current major depressive disorder = High | ,795  | ,737                          | ,859     |
| N de Casos Válidos                                                                                            | 1305  |                               |          |

Any comorbidity (regardless COVID risk) \* BRCS Classification

### Crosstab

| BRCS Classification |                  | Total |
|---------------------|------------------|-------|
| Low resilience      | Moderate to High |       |

|                                         |     |                                              |       |       |        |
|-----------------------------------------|-----|----------------------------------------------|-------|-------|--------|
| Any comorbidity (regardless COVID risk) | No  | Contagem                                     | 656   | 415   | 1071   |
|                                         |     | % em Any comorbidity (regardless COVID risk) | 61,3% | 38,7% | 100,0% |
|                                         |     | % do Total                                   | 50,3% | 31,8% | 82,1%  |
|                                         | Yes | Contagem                                     | 154   | 80    | 234    |
|                                         |     | % em Any comorbidity (regardless COVID risk) | 65,8% | 34,2% | 100,0% |
|                                         |     | % do Total                                   | 11,8% | 6,1%  | 17,9%  |
| Total                                   |     | Contagem                                     | 810   | 495   | 1305   |
|                                         |     | % em Any comorbidity (regardless COVID risk) | 62,1% | 37,9% | 100,0% |
|                                         |     | % do Total                                   | 62,1% | 37,9% | 100,0% |

### Testes qui-quadrado

|                                       | Valor              | gl | Significância Assintótica (Bilateral) | Sig exata (2 lados) | Sig exata (1 lado) |
|---------------------------------------|--------------------|----|---------------------------------------|---------------------|--------------------|
| Qui-quadrado de Pearson               | 1,697 <sup>a</sup> | 1  | ,193                                  |                     |                    |
| Correção de continuidade <sup>b</sup> | 1,509              | 1  | ,219                                  |                     |                    |
| Razão de verossimilhança              | 1,715              | 1  | ,190                                  |                     |                    |
| Teste Exato de Fisher                 |                    |    |                                       | ,206                | ,109               |
| Associação Linear por Linear          | 1,695              | 1  | ,193                                  |                     |                    |
| N de Casos Válidos                    | 1305               |    |                                       |                     |                    |

a. 0 células (,0%) esperavam uma contagem menor que 5. A contagem mínima esperada é 88,76.

b. Computado apenas para uma tabela 2x2

### Medidas Simétricas

|                     |             | Valor | Significância Aproximada |
|---------------------|-------------|-------|--------------------------|
| Nominal por Nominal | Fi          | ,036  | ,193                     |
|                     | V de Cramer | ,036  | ,193                     |
| N de Casos Válidos  |             | 1305  |                          |

### Estimativa de Risco

|                                                                          | Valor | Intervalo de confiança de 95% |          |
|--------------------------------------------------------------------------|-------|-------------------------------|----------|
|                                                                          |       | Inferior                      | Superior |
| Razão de Chances para Any comorbidity (regardless COVID risk) (No / Yes) | ,821  | ,610                          | 1,105    |
| Para grupo BRCS Classification = Low resilience                          | ,931  | ,839                          | 1,033    |
| Para grupo BRCS Classification = Moderate to High                        | 1,133 | ,934                          | 1,375    |

|                    |      |  |  |
|--------------------|------|--|--|
| N de Casos Válidos | 1305 |  |  |
|--------------------|------|--|--|

Any comorbidity (regardless COVID risk) \* OLBI Score Classification

### Crosstab

|                                         |       |                                              | OLBI Score Classification |       | Total  |
|-----------------------------------------|-------|----------------------------------------------|---------------------------|-------|--------|
|                                         |       |                                              | Low to Moderate           | High  |        |
| Any comorbidity (regardless COVID risk) | No    | Contagem                                     | 740                       | 331   | 1071   |
|                                         |       | % em Any comorbidity (regardless COVID risk) | 69,1%                     | 30,9% | 100,0% |
|                                         |       | % do Total                                   | 56,7%                     | 25,4% | 82,1%  |
|                                         | Yes   | Contagem                                     | 129                       | 105   | 234    |
|                                         |       | % em Any comorbidity (regardless COVID risk) | 55,1%                     | 44,9% | 100,0% |
|                                         |       | % do Total                                   | 9,9%                      | 8,0%  | 17,9%  |
|                                         | Total | Contagem                                     | 869                       | 436   | 1305   |
|                                         |       | % em Any comorbidity (regardless COVID risk) | 66,6%                     | 33,4% | 100,0% |
|                                         |       | % do Total                                   | 66,6%                     | 33,4% | 100,0% |

### Testes qui-quadrado

|                                       | Valor               | gl | Significância Assintótica (Bilateral) | Sig exata (2 lados) | Sig exata (1 lado) |
|---------------------------------------|---------------------|----|---------------------------------------|---------------------|--------------------|
| Qui-quadrado de Pearson               | 16,837 <sup>a</sup> | 1  | ,000                                  |                     |                    |
| Correção de continuidade <sup>b</sup> | 16,215              | 1  | ,000                                  |                     |                    |
| Razão de verossimilhança              | 16,265              | 1  | ,000                                  |                     |                    |
| Teste Exato de Fisher                 |                     |    |                                       | ,000                | ,000               |
| Associação Linear por Linear          | 16,824              | 1  | ,000                                  |                     |                    |
| N de Casos Válidos                    | 1305                |    |                                       |                     |                    |

a. 0 células (,0%) esperavam uma contagem menor que 5. A contagem mínima esperada é 78,18.

b. Computado apenas para uma tabela 2x2

### Medidas Simétricas

|                     |             | Valor | Significância Aproximada |
|---------------------|-------------|-------|--------------------------|
| Nominal por Nominal | Fi          | ,114  | ,000                     |
|                     | V de Cramer | ,114  | ,000                     |
| N de Casos Válidos  |             | 1305  |                          |

### Estimativa de Risco

|                                                                          | Valor | Intervalo de confiança de 95% |          |
|--------------------------------------------------------------------------|-------|-------------------------------|----------|
|                                                                          |       | Inferior                      | Superior |
| Razão de Chances para Any comorbidity (regardless COVID risk) (No / Yes) | 1,820 | 1,364                         | 2,428    |
| Para grupo OLBI Score Classification = Low to Moderate                   | 1,253 | 1,109                         | 1,416    |
| Para grupo OLBI Score Classification = High                              | ,689  | ,582                          | ,815     |
| N de Casos Válidos                                                       | 1305  |                               |          |

Risk factor(s) for severe COVID19 \* DASS21 Classification - Depression (dichotomous)

### Crosstab

|                                   |                                        |                                        | DASS21 Classification - Depression (dichotomous) |                     | Total  |
|-----------------------------------|----------------------------------------|----------------------------------------|--------------------------------------------------|---------------------|--------|
|                                   |                                        |                                        | Normal                                           | Abnormal (elevated) |        |
| Risk factor(s) for severe COVID19 | No                                     | Contagem                               | 761                                              | 326                 | 1087   |
|                                   |                                        | % em Risk factor(s) for severe COVID19 | 70,0%                                            | 30,0%               | 100,0% |
|                                   |                                        | % do Total                             | 58,3%                                            | 25,0%               | 83,3%  |
|                                   | Yes                                    | Contagem                               | 104                                              | 114                 | 218    |
|                                   |                                        | % em Risk factor(s) for severe COVID19 | 47,7%                                            | 52,3%               | 100,0% |
|                                   |                                        | % do Total                             | 8,0%                                             | 8,7%                | 16,7%  |
| Total                             | Contagem                               |                                        | 865                                              | 440                 | 1305   |
|                                   | % em Risk factor(s) for severe COVID19 |                                        | 66,3%                                            | 33,7%               | 100,0% |
|                                   | % do Total                             |                                        | 66,3%                                            | 33,7%               | 100,0% |

### Testes qui-quadrado

|                                       | Valor               | gl | Significância Assintótica (Bilateral) | Sig exata (2 lados) | Sig exata (1 lado) |
|---------------------------------------|---------------------|----|---------------------------------------|---------------------|--------------------|
| Qui-quadrado de Pearson               | 40,415 <sup>a</sup> | 1  | ,000                                  |                     |                    |
| Correção de continuidade <sup>b</sup> | 39,423              | 1  | ,000                                  |                     |                    |
| Razão de verossimilhança              | 38,545              | 1  | ,000                                  |                     |                    |
| Teste Exato de Fisher                 |                     |    |                                       | ,000                | ,000               |
| Associação Linear por Linear          | 40,384              | 1  | ,000                                  |                     |                    |

|                    |      |  |  |  |  |
|--------------------|------|--|--|--|--|
| N de Casos Válidos | 1305 |  |  |  |  |
|--------------------|------|--|--|--|--|

a. 0 células (,0%) esperavam uma contagem menor que 5. A contagem mínima esperada é 73,50.

b. Computado apenas para uma tabela 2x2

### Medidas Simétricas

|                     |             | Valor | Significância Aproximada |
|---------------------|-------------|-------|--------------------------|
| Nominal por Nominal | Fi          | ,176  | ,000                     |
|                     | V de Cramer | ,176  | ,000                     |
| N de Casos Válidos  |             | 1305  |                          |

### Estimativa de Risco

|                                                                                   | Valor | Intervalo de confiança de 95% |          |
|-----------------------------------------------------------------------------------|-------|-------------------------------|----------|
|                                                                                   |       | Inferior                      | Superior |
| Razão de Chances para Risk factor(s) for severe COVID19 (No / Yes)                | 2,559 | 1,904                         | 3,439    |
| Para grupo DASS21 Classification - Depression (dichotomous) = Normal              | 1,468 | 1,270                         | 1,695    |
| Para grupo DASS21 Classification - Depression (dichotomous) = Abnormal (elevated) | ,574  | ,491                          | ,670     |
| N de Casos Válidos                                                                | 1305  |                               |          |

Risk factor(s) for severe COVID19 \* DASS21 Classification - Anxiety (dichotomous)

### Crosstab

|                                   |     |                                        | DASS21 Classification - Anxiety (dichotomous) |                     | Total  |
|-----------------------------------|-----|----------------------------------------|-----------------------------------------------|---------------------|--------|
|                                   |     |                                        | Normal                                        | Abnormal (elevated) |        |
| Risk factor(s) for severe COVID19 | No  | Contagem                               | 741                                           | 346                 | 1087   |
|                                   |     | % em Risk factor(s) for severe COVID19 | 68,2%                                         | 31,8%               | 100,0% |
|                                   |     | % do Total                             | 56,8%                                         | 26,5%               | 83,3%  |
|                                   | Yes | Contagem                               | 116                                           | 102                 | 218    |
|                                   |     | % em Risk factor(s) for severe COVID19 | 53,2%                                         | 46,8%               | 100,0% |
|                                   |     | % do Total                             | 8,9%                                          | 7,8%                | 16,7%  |

|       |                                        |       |       |        |
|-------|----------------------------------------|-------|-------|--------|
| Total | Contagem                               | 857   | 448   | 1305   |
|       | % em Risk factor(s) for severe COVID19 | 65,7% | 34,3% | 100,0% |
|       |                                        |       |       |        |
|       | % do Total                             | 65,7% | 34,3% | 100,0% |

### Testes qui-quadrado

|                                       | Valor               | gl | Significância Assintótica (Bilateral) | Sig exata (2 lados) | Sig exata (1 lado) |
|---------------------------------------|---------------------|----|---------------------------------------|---------------------|--------------------|
| Qui-quadrado de Pearson               | 18,022 <sup>a</sup> | 1  | ,000                                  |                     |                    |
| Correção de continuidade <sup>b</sup> | 17,364              | 1  | ,000                                  |                     |                    |
| Razão de verossimilhança              | 17,405              | 1  | ,000                                  |                     |                    |
| Teste Exato de Fisher                 |                     |    |                                       | ,000                | ,000               |
| Associação Linear por Linear          | 18,008              | 1  | ,000                                  |                     |                    |
| N de Casos Válidos                    | 1305                |    |                                       |                     |                    |

a. 0 células (,0%) esperavam uma contagem menor que 5. A contagem mínima esperada é 74,84.

b. Computado apenas para uma tabela 2x2

### Medidas Simétricas

|                     |             | Valor | Significância Aproximada |
|---------------------|-------------|-------|--------------------------|
| Nominal por Nominal | Fi          | ,118  | ,000                     |
|                     | V de Cramer | ,118  | ,000                     |
| N de Casos Válidos  |             | 1305  |                          |

### Estimativa de Risco

|                                                                                | Valor | Intervalo de confiança de 95% |          |
|--------------------------------------------------------------------------------|-------|-------------------------------|----------|
|                                                                                |       | Inferior                      | Superior |
| Razão de Chances para Risk factor(s) for severe COVID19 (No / Yes)             | 1,883 | 1,402                         | 2,529    |
| Para grupo DASS21 Classification - Anxiety (dichotomous) = Normal              | 1,281 | 1,124                         | 1,460    |
| Para grupo DASS21 Classification - Anxiety (dichotomous) = Abnormal (elevated) | ,680  | ,576                          | ,803     |
| N de Casos Válidos                                                             | 1305  |                               |          |

Risk factor(s) for severe COVID19 \* DASS21 Classification - Stress (dichotomous)

### Crosstab

|                                      |                                           |                                           | DASS21 Classification - Stress<br>(dichotomous) |                        |        |
|--------------------------------------|-------------------------------------------|-------------------------------------------|-------------------------------------------------|------------------------|--------|
|                                      |                                           |                                           | Normal                                          | Abnormal<br>(elevated) | Total  |
| Risk factor(s) for severe<br>COVID19 | No                                        | Contagem                                  | 850                                             | 237                    | 1087   |
|                                      |                                           | % em Risk factor(s) for severe<br>COVID19 | 78,2%                                           | 21,8%                  | 100,0% |
|                                      |                                           | % do Total                                | 65,1%                                           | 18,2%                  | 83,3%  |
|                                      | Yes                                       | Contagem                                  | 157                                             | 61                     | 218    |
|                                      |                                           | % em Risk factor(s) for severe<br>COVID19 | 72,0%                                           | 28,0%                  | 100,0% |
|                                      |                                           | % do Total                                | 12,0%                                           | 4,7%                   | 16,7%  |
| Total                                | Contagem                                  |                                           | 1007                                            | 298                    | 1305   |
|                                      | % em Risk factor(s) for severe<br>COVID19 |                                           | 77,2%                                           | 22,8%                  | 100,0% |
|                                      | % do Total                                |                                           | 77,2%                                           | 22,8%                  | 100,0% |

### Testes qui-quadrado

|                                       | Valor              | gl | Significância<br>Assintótica<br>(Bilateral) | Sig exata (2 lados) | Sig exata (1 lado) |
|---------------------------------------|--------------------|----|---------------------------------------------|---------------------|--------------------|
| Qui-quadrado de Pearson               | 3,934 <sup>a</sup> | 1  | ,047                                        |                     |                    |
| Correção de continuidade <sup>b</sup> | 3,591              | 1  | ,058                                        |                     |                    |
| Razão de verossimilhança              | 3,787              | 1  | ,052                                        |                     |                    |
| Teste Exato de Fisher                 |                    |    |                                             | ,052                | ,031               |
| Associação Linear por Linear          | 3,931              | 1  | ,047                                        |                     |                    |
| N de Casos Válidos                    | 1305               |    |                                             |                     |                    |

a. 0 células (,0%) esperavam uma contagem menor que 5. A contagem mínima esperada é 49,78.

b. Computado apenas para uma tabela 2x2

### Medidas Simétricas

|                     |             | Valor | Significância<br>Aproximada |
|---------------------|-------------|-------|-----------------------------|
| Nominal por Nominal | Fi          | ,055  | ,047                        |
|                     | V de Cramer | ,055  | ,047                        |
| N de Casos Válidos  |             | 1305  |                             |

### Estimativa de Risco

| Valor | Intervalo de confiança de 95% |          |
|-------|-------------------------------|----------|
|       | Inferior                      | Superior |

|                                                                               |       |       |       |
|-------------------------------------------------------------------------------|-------|-------|-------|
| Razão de Chances para Risk factor(s) for severe COVID19 (No / Yes)            | 1,393 | 1,003 | 1,936 |
| Para grupo DASS21 Classification - Stress (dichotomous) = Normal              | 1,086 | ,994  | 1,186 |
| Para grupo DASS21 Classification - Stress (dichotomous) = Abnormal (elevated) | ,779  | ,612  | ,991  |
| N de Casos Válidos                                                            | 1305  |       |       |

Risk factor(s) for severe COVID19 \* PHQ9 Depression Classification - Risk estimate for having current major depressive disorder

### Crosstab

|                                   |                                        |                                        | PHQ9 Depression Classification - Risk estimate for having current major depressive disorder |       |        |
|-----------------------------------|----------------------------------------|----------------------------------------|---------------------------------------------------------------------------------------------|-------|--------|
|                                   |                                        |                                        | Low                                                                                         | High  | Total  |
| Risk factor(s) for severe COVID19 | No                                     | Contagem                               | 385                                                                                         | 702   | 1087   |
|                                   |                                        | % em Risk factor(s) for severe COVID19 | 35,4%                                                                                       | 64,6% | 100,0% |
|                                   |                                        | % do Total                             | 29,5%                                                                                       | 53,8% | 83,3%  |
|                                   | Yes                                    | Contagem                               | 43                                                                                          | 175   | 218    |
|                                   |                                        | % em Risk factor(s) for severe COVID19 | 19,7%                                                                                       | 80,3% | 100,0% |
|                                   |                                        | % do Total                             | 3,3%                                                                                        | 13,4% | 16,7%  |
| Total                             | Contagem                               |                                        | 428                                                                                         | 877   | 1305   |
|                                   | % em Risk factor(s) for severe COVID19 |                                        | 32,8%                                                                                       | 67,2% | 100,0% |
|                                   | % do Total                             |                                        | 32,8%                                                                                       | 67,2% | 100,0% |

### Testes qui-quadrado

|                                       | Valor               | gl | Significância Assintótica (Bilateral) | Sig exata (2 lados) | Sig exata (1 lado) |
|---------------------------------------|---------------------|----|---------------------------------------|---------------------|--------------------|
| Qui-quadrado de Pearson               | 20,291 <sup>a</sup> | 1  | ,000                                  |                     |                    |
| Correção de continuidade <sup>b</sup> | 19,586              | 1  | ,000                                  |                     |                    |
| Razão de verossimilhança              | 21,828              | 1  | ,000                                  |                     |                    |
| Teste Exato de Fisher                 |                     |    |                                       | ,000                | ,000               |
| Associação Linear por Linear          | 20,276              | 1  | ,000                                  |                     |                    |
| N de Casos Válidos                    | 1305                |    |                                       |                     |                    |

a. 0 células (,0%) esperavam uma contagem menor que 5. A contagem mínima esperada é 71,50.

b. Computado apenas para uma tabela 2x2

### Medidas Simétricas

|                     |             | Valor | Significância Aproximada |
|---------------------|-------------|-------|--------------------------|
| Nominal por Nominal | Fi          | ,125  | ,000                     |
|                     | V de Cramer | ,125  | ,000                     |
| N de Casos Válidos  |             | 1305  |                          |

### Estimativa de Risco

|                                                                                                               | Valor | Intervalo de confiança de 95% |          |
|---------------------------------------------------------------------------------------------------------------|-------|-------------------------------|----------|
|                                                                                                               |       | Inferior                      | Superior |
| Razão de Chances para Risk factor(s) for severe COVID19 (No / Yes)                                            | 2,232 | 1,563                         | 3,186    |
| Para grupo PHQ9 Depression Classification - Risk estimate for having current major depressive disorder = Low  | 1,796 | 1,358                         | 2,375    |
| Para grupo PHQ9 Depression Classification - Risk estimate for having current major depressive disorder = High | ,804  | ,743                          | ,871     |
| N de Casos Válidos                                                                                            | 1305  |                               |          |

Risk factor(s) for severe COVID19 \* BRCS Classification

### Crosstab

|                                   |                                        |                                        | BRCS Classification |                  | Total  |
|-----------------------------------|----------------------------------------|----------------------------------------|---------------------|------------------|--------|
|                                   |                                        |                                        | Low resilience      | Moderate to High |        |
| Risk factor(s) for severe COVID19 | No                                     | Contagem                               | 665                 | 422              | 1087   |
|                                   |                                        | % em Risk factor(s) for severe COVID19 | 61,2%               | 38,8%            | 100,0% |
|                                   |                                        | % do Total                             | 51,0%               | 32,3%            | 83,3%  |
|                                   | Yes                                    | Contagem                               | 145                 | 73               | 218    |
|                                   |                                        | % em Risk factor(s) for severe COVID19 | 66,5%               | 33,5%            | 100,0% |
|                                   |                                        | % do Total                             | 11,1%               | 5,6%             | 16,7%  |
| Total                             | Contagem                               |                                        | 810                 | 495              | 1305   |
|                                   | % em Risk factor(s) for severe COVID19 |                                        | 62,1%               | 37,9%            | 100,0% |

|            |       |       |        |
|------------|-------|-------|--------|
| % do Total | 62,1% | 37,9% | 100,0% |
|------------|-------|-------|--------|

### Testes qui-quadrado

|                                       | Valor              | gl | Significância<br>Assintótica<br>(Bilateral) | Sig exata (2 lados) | Sig exata (1 lado) |
|---------------------------------------|--------------------|----|---------------------------------------------|---------------------|--------------------|
| Qui-quadrado de Pearson               | 2,196 <sup>a</sup> | 1  | ,138                                        |                     |                    |
| Correção de continuidade <sup>b</sup> | 1,975              | 1  | ,160                                        |                     |                    |
| Razão de verossimilhança              | 2,226              | 1  | ,136                                        |                     |                    |
| Teste Exato de Fisher                 |                    |    |                                             | ,147                | ,079               |
| Associação Linear por Linear          | 2,195              | 1  | ,139                                        |                     |                    |
| N de Casos Válidos                    | 1305               |    |                                             |                     |                    |

a. 0 células (,0%) esperavam uma contagem menor que 5. A contagem mínima esperada é 82,69.

b. Computado apenas para uma tabela 2x2

### Medidas Simétricas

|                     |             | Valor | Significância<br>Aproximada |
|---------------------|-------------|-------|-----------------------------|
| Nominal por Nominal | Fi          | -,041 | ,138                        |
|                     | V de Cramer | ,041  | ,138                        |
| N de Casos Válidos  |             | 1305  |                             |

### Estimativa de Risco

|                                                                    | Valor | Intervalo de confiança de 95% |          |
|--------------------------------------------------------------------|-------|-------------------------------|----------|
|                                                                    |       | Inferior                      | Superior |
| Razão de Chances para Risk factor(s) for severe COVID19 (No / Yes) | ,793  | ,584                          | 1,078    |
| Para grupo BRCS Classification = Low resilience                    | ,920  | ,828                          | 1,022    |
| Para grupo BRCS Classification = Moderate to High                  | 1,159 | ,948                          | 1,418    |
| N de Casos Válidos                                                 | 1305  |                               |          |

Risk factor(s) for severe COVID19 \* OLBI Score Classification

### Crosstab

| OLBI Score Classification |      | Total |
|---------------------------|------|-------|
| Low to Moderate           | High |       |

|                                   |       |                                        |       |       |        |
|-----------------------------------|-------|----------------------------------------|-------|-------|--------|
| Risk factor(s) for severe COVID19 | No    | Contagem                               | 752   | 335   | 1087   |
|                                   |       | % em Risk factor(s) for severe COVID19 | 69,2% | 30,8% | 100,0% |
|                                   |       | % do Total                             | 57,6% | 25,7% | 83,3%  |
|                                   | Yes   | Contagem                               | 117   | 101   | 218    |
|                                   |       | % em Risk factor(s) for severe COVID19 | 53,7% | 46,3% | 100,0% |
|                                   |       | % do Total                             | 9,0%  | 7,7%  | 16,7%  |
|                                   | Total | Contagem                               | 869   | 436   | 1305   |
|                                   |       | % em Risk factor(s) for severe COVID19 | 66,6% | 33,4% | 100,0% |
|                                   |       | % do Total                             | 66,6% | 33,4% | 100,0% |

### Testes qui-quadrado

|                                       | Valor               | gl | Significância Assintótica (Bilateral) | Sig exata (2 lados) | Sig exata (1 lado) |
|---------------------------------------|---------------------|----|---------------------------------------|---------------------|--------------------|
| Qui-quadrado de Pearson               | 19,638 <sup>a</sup> | 1  | ,000                                  |                     |                    |
| Correção de continuidade <sup>b</sup> | 18,947              | 1  | ,000                                  |                     |                    |
| Razão de verossimilhança              | 18,892              | 1  | ,000                                  |                     |                    |
| Teste Exato de Fisher                 |                     |    |                                       | ,000                | ,000               |
| Associação Linear por Linear          | 19,623              | 1  | ,000                                  |                     |                    |
| N de Casos Válidos                    | 1305                |    |                                       |                     |                    |

a. 0 células (,0%) esperavam uma contagem menor que 5. A contagem mínima esperada é 72,83.

b. Computado apenas para uma tabela 2x2

### Medidas Simétricas

|                     |             | Valor | Significância Aproximada |
|---------------------|-------------|-------|--------------------------|
| Nominal por Nominal | Fi          | ,123  | ,000                     |
|                     | V de Cramer | ,123  | ,000                     |
| N de Casos Válidos  |             | 1305  |                          |

### Estimativa de Risco

|                                                                    | Valor | Intervalo de confiança de 95% |          |
|--------------------------------------------------------------------|-------|-------------------------------|----------|
|                                                                    |       | Inferior                      | Superior |
| Razão de Chances para Risk factor(s) for severe COVID19 (No / Yes) | 1,938 | 1,442                         | 2,605    |
| Para grupo OLBI Score Classification = Low to Moderate             | 1,289 | 1,132                         | 1,467    |
| Para grupo OLBI Score Classification = High                        | ,665  | ,562                          | ,787     |

|                    |      |  |  |
|--------------------|------|--|--|
| N de Casos Válidos | 1305 |  |  |
|--------------------|------|--|--|

The institution is a university hospital \* DASS21 Classification - Depression (dichotomous)

### Crosstab

|                                          |                                               |                                               | DASS21 Classification - Depression<br>(dichotomous) |                        |        |
|------------------------------------------|-----------------------------------------------|-----------------------------------------------|-----------------------------------------------------|------------------------|--------|
|                                          |                                               |                                               | Normal                                              | Abnormal<br>(elevated) | Total  |
| The institution is a university hospital | No                                            | Contagem                                      | 84                                                  | 52                     | 136    |
|                                          |                                               | % em The institution is a university hospital | 61,8%                                               | 38,2%                  | 100,0% |
|                                          |                                               | % do Total                                    | 6,4%                                                | 4,0%                   | 10,4%  |
|                                          | Yes                                           | Contagem                                      | 786                                                 | 391                    | 1177   |
|                                          |                                               | % em The institution is a university hospital | 66,8%                                               | 33,2%                  | 100,0% |
|                                          |                                               | % do Total                                    | 59,9%                                               | 29,8%                  | 89,6%  |
| Total                                    | Contagem                                      |                                               | 870                                                 | 443                    | 1313   |
|                                          | % em The institution is a university hospital |                                               | 66,3%                                               | 33,7%                  | 100,0% |
|                                          | % do Total                                    |                                               | 66,3%                                               | 33,7%                  | 100,0% |

### Testes qui-quadrado

|                                       | Valor              | gl | Significância<br>Assintótica<br>(Bilateral) | Sig exata (2 lados) | Sig exata (1 lado) |
|---------------------------------------|--------------------|----|---------------------------------------------|---------------------|--------------------|
| Qui-quadrado de Pearson               | 1,372 <sup>a</sup> | 1  | ,242                                        |                     |                    |
| Correção de continuidade <sup>b</sup> | 1,156              | 1  | ,282                                        |                     |                    |
| Razão de verossimilhança              | 1,348              | 1  | ,246                                        |                     |                    |
| Teste Exato de Fisher                 |                    |    |                                             | ,251                | ,141               |
| Associação Linear por Linear          | 1,371              | 1  | ,242                                        |                     |                    |
| N de Casos Válidos                    | 1313               |    |                                             |                     |                    |

a. 0 células (,0%) esperavam uma contagem menor que 5. A contagem mínima esperada é 45,89.

b. Computado apenas para uma tabela 2x2

### Medidas Simétricas

|                     |             | Valor | Significância<br>Aproximada |
|---------------------|-------------|-------|-----------------------------|
| Nominal por Nominal | Fi          | -,032 | ,242                        |
|                     | V de Cramer | ,032  | ,242                        |

|                    |      |
|--------------------|------|
| N de Casos Válidos | 1313 |
|--------------------|------|

### Estimativa de Risco

|                                                                                   | Valor | Intervalo de confiança de 95% |          |
|-----------------------------------------------------------------------------------|-------|-------------------------------|----------|
|                                                                                   |       | Inferior                      | Superior |
| Razão de Chances para The institution is a university hospital (No / Yes)         | ,804  | ,557                          | 1,159    |
| Para grupo DASS21 Classification - Depression (dichotomous) = Normal              | ,925  | ,805                          | 1,062    |
| Para grupo DASS21 Classification - Depression (dichotomous) = Abnormal (elevated) | 1,151 | ,916                          | 1,446    |
| N de Casos Válidos                                                                | 1313  |                               |          |

The institution is a university hospital \* DASS21 Classification - Anxiety (dichotomous)

### Crosstab

|                                          |                                               |                                               | DASS21 Classification - Anxiety (dichotomous) |                     | Total  |
|------------------------------------------|-----------------------------------------------|-----------------------------------------------|-----------------------------------------------|---------------------|--------|
|                                          |                                               |                                               | Normal                                        | Abnormal (elevated) |        |
| The institution is a university hospital | No                                            | Contagem                                      | 77                                            | 59                  | 136    |
|                                          |                                               | % em The institution is a university hospital | 56,6%                                         | 43,4%               | 100,0% |
|                                          |                                               | % do Total                                    | 5,9%                                          | 4,5%                | 10,4%  |
|                                          | Yes                                           | Contagem                                      | 784                                           | 393                 | 1177   |
|                                          |                                               | % em The institution is a university hospital | 66,6%                                         | 33,4%               | 100,0% |
|                                          |                                               | % do Total                                    | 59,7%                                         | 29,9%               | 89,6%  |
| Total                                    | Contagem                                      |                                               | 861                                           | 452                 | 1313   |
|                                          | % em The institution is a university hospital |                                               | 65,6%                                         | 34,4%               | 100,0% |
|                                          | % do Total                                    |                                               | 65,6%                                         | 34,4%               | 100,0% |

### Testes qui-quadrado

|       |    | Significância Assintótica (Bilateral) | Sig exata (2 lados) | Sig exata (1 lado) |
|-------|----|---------------------------------------|---------------------|--------------------|
| Valor | gl |                                       |                     |                    |

|                                       |                    |   |      |      |      |
|---------------------------------------|--------------------|---|------|------|------|
| Qui-quadrado de Pearson               | 5,392 <sup>a</sup> | 1 | ,020 |      |      |
| Correção de continuidade <sup>b</sup> | 4,959              | 1 | ,026 |      |      |
| Razão de verossimilhança              | 5,233              | 1 | ,022 |      |      |
| Teste Exato de Fisher                 |                    |   |      | ,022 | ,014 |
| Associação Linear por Linear          | 5,388              | 1 | ,020 |      |      |
| N de Casos Válidos                    | 1313               |   |      |      |      |

a. 0 células (,0%) esperavam uma contagem menor que 5. A contagem mínima esperada é 46,82.

b. Computado apenas para uma tabela 2x2

### Medidas Simétricas

|                     |             | Valor | Significância Aproximada |
|---------------------|-------------|-------|--------------------------|
| Nominal por Nominal | Fi          | -,064 | ,020                     |
|                     | V de Cramer | ,064  | ,020                     |
| N de Casos Válidos  |             | 1313  |                          |

### Estimativa de Risco

|                                                                                | Valor | Intervalo de confiança de 95% |          |
|--------------------------------------------------------------------------------|-------|-------------------------------|----------|
|                                                                                |       | Inferior                      | Superior |
| Razão de Chances para The institution is a university hospital (No / Yes)      | ,654  | ,456                          | ,938     |
| Para grupo DASS21 Classification - Anxiety (dichotomous) = Normal              | ,850  | ,730                          | ,990     |
| Para grupo DASS21 Classification - Anxiety (dichotomous) = Abnormal (elevated) | 1,299 | 1,055                         | 1,600    |
| N de Casos Válidos                                                             | 1313  |                               |          |

The institution is a university hospital \* DASS21 Classification - Stress (dichotomous)

### Crosstab

|                                          |    |                                               | DASS21 Classification - Stress (dichotomous) |                     | Total  |
|------------------------------------------|----|-----------------------------------------------|----------------------------------------------|---------------------|--------|
|                                          |    |                                               | Normal                                       | Abnormal (elevated) |        |
| The institution is a university hospital | No | Contagem                                      | 100                                          | 36                  | 136    |
|                                          |    | % em The institution is a university hospital | 73,5%                                        | 26,5%               | 100,0% |
|                                          |    | % do Total                                    | 7,6%                                         | 2,7%                | 10,4%  |

|       |     |                                               |       |       |        |
|-------|-----|-----------------------------------------------|-------|-------|--------|
|       | Yes | Contagem                                      | 912   | 265   | 1177   |
|       |     | % em The institution is a university hospital | 77,5% | 22,5% | 100,0% |
|       |     | % do Total                                    | 69,5% | 20,2% | 89,6%  |
| Total |     | Contagem                                      | 1012  | 301   | 1313   |
|       |     | % em The institution is a university hospital | 77,1% | 22,9% | 100,0% |
|       |     | % do Total                                    | 77,1% | 22,9% | 100,0% |

### Testes qui-quadrado

|                                       | Valor              | gl | Significância Assintótica (Bilateral) | Sig exata (2 lados) | Sig exata (1 lado) |
|---------------------------------------|--------------------|----|---------------------------------------|---------------------|--------------------|
| Qui-quadrado de Pearson               | 1,080 <sup>a</sup> | 1  | ,299                                  |                     |                    |
| Correção de continuidade <sup>b</sup> | ,867               | 1  | ,352                                  |                     |                    |
| Razão de verossimilhança              | 1,048              | 1  | ,306                                  |                     |                    |
| Teste Exato de Fisher                 |                    |    |                                       | ,332                | ,175               |
| Associação Linear por Linear          | 1,079              | 1  | ,299                                  |                     |                    |
| N de Casos Válidos                    | 1313               |    |                                       |                     |                    |

a. 0 células (,0%) esperavam uma contagem menor que 5. A contagem mínima esperada é 31,18.

b. Computado apenas para uma tabela 2x2

### Medidas Simétricas

|                     |             | Valor | Significância Aproximada |
|---------------------|-------------|-------|--------------------------|
| Nominal por Nominal | Fi          | -,029 | ,299                     |
|                     | V de Cramer | ,029  | ,299                     |
| N de Casos Válidos  |             | 1313  |                          |

### Estimativa de Risco

|                                                                               | Valor | Intervalo de confiança de 95% |          |
|-------------------------------------------------------------------------------|-------|-------------------------------|----------|
|                                                                               |       | Inferior                      | Superior |
| Razão de Chances para The institution is a university hospital (No / Yes)     | ,807  | ,538                          | 1,210    |
| Para grupo DASS21 Classification - Stress (dichotomous) = Normal              | ,949  | ,854                          | 1,054    |
| Para grupo DASS21 Classification - Stress (dichotomous) = Abnormal (elevated) | 1,176 | ,871                          | 1,586    |
| N de Casos Válidos                                                            | 1313  |                               |          |

The institution is a university hospital \* PHQ9 Depression Classification - Risk estimate for having current major depressive disorder

### Crosstab

|                                          |                                               |                                               | PHQ9 Depression Classification - Risk estimate for having current major depressive disorder |       | Total  |
|------------------------------------------|-----------------------------------------------|-----------------------------------------------|---------------------------------------------------------------------------------------------|-------|--------|
|                                          |                                               |                                               | Low                                                                                         | High  |        |
| The institution is a university hospital | No                                            | Contagem                                      | 30                                                                                          | 106   | 136    |
|                                          |                                               | % em The institution is a university hospital | 22,1%                                                                                       | 77,9% | 100,0% |
|                                          |                                               | % do Total                                    | 2,3%                                                                                        | 8,1%  | 10,4%  |
|                                          | Yes                                           | Contagem                                      | 399                                                                                         | 778   | 1177   |
|                                          |                                               | % em The institution is a university hospital | 33,9%                                                                                       | 66,1% | 100,0% |
|                                          |                                               | % do Total                                    | 30,4%                                                                                       | 59,3% | 89,6%  |
| Total                                    | Contagem                                      |                                               | 429                                                                                         | 884   | 1313   |
|                                          | % em The institution is a university hospital |                                               | 32,7%                                                                                       | 67,3% | 100,0% |
|                                          | % do Total                                    |                                               | 32,7%                                                                                       | 67,3% | 100,0% |

### Testes qui-quadrado

|                                       | Valor              | gl | Significância Assintótica (Bilateral) | Sig exata (2 lados) | Sig exata (1 lado) |
|---------------------------------------|--------------------|----|---------------------------------------|---------------------|--------------------|
| Qui-quadrado de Pearson               | 7,770 <sup>a</sup> | 1  | ,005                                  |                     |                    |
| Correção de continuidade <sup>b</sup> | 7,241              | 1  | ,007                                  |                     |                    |
| Razão de verossimilhança              | 8,265              | 1  | ,004                                  |                     |                    |
| Teste Exato de Fisher                 |                    |    |                                       | ,005                | ,003               |
| Associação Linear por Linear          | 7,764              | 1  | ,005                                  |                     |                    |
| N de Casos Válidos                    | 1313               |    |                                       |                     |                    |

a. 0 células (,0%) esperavam uma contagem menor que 5. A contagem mínima esperada é 44,44.

b. Computado apenas para uma tabela 2x2

### Medidas Simétricas

|                     |             | Valor | Significância Aproximada |
|---------------------|-------------|-------|--------------------------|
| Nominal por Nominal | Fi          | -,077 | ,005                     |
|                     | V de Cramer | ,077  | ,005                     |
| N de Casos Válidos  |             | 1313  |                          |

### Estimativa de Risco

|                                                                                                               | Valor | Intervalo de confiança de 95% |          |
|---------------------------------------------------------------------------------------------------------------|-------|-------------------------------|----------|
|                                                                                                               |       | Inferior                      | Superior |
| Razão de Chances para The institution is a university hospital (No / Yes)                                     | ,552  | ,362                          | ,842     |
| Para grupo PHQ9 Depression Classification - Risk estimate for having current major depressive disorder = Low  | ,651  | ,470                          | ,901     |
| Para grupo PHQ9 Depression Classification - Risk estimate for having current major depressive disorder = High | 1,179 | 1,069                         | 1,301    |
| N de Casos Válidos                                                                                            | 1313  |                               |          |

The institution is a university hospital \* BRCS Classification

### Crosstab

|                                          |                                               |                                               | BRCS Classification |                  | Total  |
|------------------------------------------|-----------------------------------------------|-----------------------------------------------|---------------------|------------------|--------|
|                                          |                                               |                                               | Low resilience      | Moderate to High |        |
| The institution is a university hospital | No                                            | Contagem                                      | 83                  | 53               | 136    |
|                                          |                                               | % em The institution is a university hospital | 61,0%               | 39,0%            | 100,0% |
|                                          |                                               | % do Total                                    | 6,3%                | 4,0%             | 10,4%  |
|                                          | Yes                                           | Contagem                                      | 730                 | 447              | 1177   |
|                                          |                                               | % em The institution is a university hospital | 62,0%               | 38,0%            | 100,0% |
|                                          |                                               | % do Total                                    | 55,6%               | 34,0%            | 89,6%  |
| Total                                    | Contagem                                      |                                               | 813                 | 500              | 1313   |
|                                          | % em The institution is a university hospital |                                               | 61,9%               | 38,1%            | 100,0% |
|                                          | % do Total                                    |                                               | 61,9%               | 38,1%            | 100,0% |

### Testes qui-quadrado

|                                       | Valor             | gl | Significância Assintótica (Bilateral) | Sig exata (2 lados) | Sig exata (1 lado) |
|---------------------------------------|-------------------|----|---------------------------------------|---------------------|--------------------|
| Qui-quadrado de Pearson               | ,051 <sup>a</sup> | 1  | ,821                                  |                     |                    |
| Correção de continuidade <sup>b</sup> | ,018              | 1  | ,895                                  |                     |                    |
| Razão de verossimilhança              | ,051              | 1  | ,822                                  |                     |                    |

|                              |      |   |      |      |      |
|------------------------------|------|---|------|------|------|
| Teste Exato de Fisher        |      |   |      | ,852 | ,445 |
| Associação Linear por Linear | ,051 | 1 | ,821 |      |      |
| N de Casos Válidos           | 1313 |   |      |      |      |

a. 0 células (,0%) esperavam uma contagem menor que 5. A contagem mínima esperada é 51,79.

b. Computado apenas para uma tabela 2x2

### Medidas Simétricas

|                     |             | Valor | Significância Aproximada |
|---------------------|-------------|-------|--------------------------|
| Nominal por Nominal | Fi          | -,006 | ,821                     |
|                     | V de Cramer | ,006  | ,821                     |
| N de Casos Válidos  |             | 1313  |                          |

### Estimativa de Risco

|                                                                           | Valor | Intervalo de confiança de 95% |          |
|---------------------------------------------------------------------------|-------|-------------------------------|----------|
|                                                                           |       | Inferior                      | Superior |
| Razão de Chances para The institution is a university hospital (No / Yes) | ,959  | ,666                          | 1,380    |
| Para grupo BRCS Classification = Low resilience                           | ,984  | ,854                          | 1,134    |
| Para grupo BRCS Classification = Moderate to High                         | 1,026 | ,821                          | 1,282    |
| N de Casos Válidos                                                        | 1313  |                               |          |

The institution is a university hospital \* OLBI Score Classification

### Crosstab

|                                          |     |                                               | OLBI Score Classification |       |        |
|------------------------------------------|-----|-----------------------------------------------|---------------------------|-------|--------|
|                                          |     |                                               | Low to Moderate           | High  | Total  |
| The institution is a university hospital | No  | Contagem                                      | 83                        | 53    | 136    |
|                                          |     | % em The institution is a university hospital | 61,0%                     | 39,0% | 100,0% |
|                                          |     | % do Total                                    | 6,3%                      | 4,0%  | 10,4%  |
|                                          | Yes | Contagem                                      | 792                       | 385   | 1177   |
|                                          |     | % em The institution is a university hospital | 67,3%                     | 32,7% | 100,0% |
|                                          |     | % do Total                                    | 60,3%                     | 29,3% | 89,6%  |
| Total                                    |     | Contagem                                      | 875                       | 438   | 1313   |

|                                               |       |       |        |
|-----------------------------------------------|-------|-------|--------|
| % em The institution is a university hospital | 66,6% | 33,4% | 100,0% |
| % do Total                                    | 66,6% | 33,4% | 100,0% |

### Testes qui-quadrado

|                                       | Valor              | gl | Significância Assintótica (Bilateral) | Sig exata (2 lados) | Sig exata (1 lado) |
|---------------------------------------|--------------------|----|---------------------------------------|---------------------|--------------------|
| Qui-quadrado de Pearson               | 2,149 <sup>a</sup> | 1  | ,143                                  |                     |                    |
| Correção de continuidade <sup>b</sup> | 1,877              | 1  | ,171                                  |                     |                    |
| Razão de verossimilhança              | 2,102              | 1  | ,147                                  |                     |                    |
| Teste Exato de Fisher                 |                    |    |                                       | ,150                | ,086               |
| Associação Linear por Linear          | 2,148              | 1  | ,143                                  |                     |                    |
| N de Casos Válidos                    | 1313               |    |                                       |                     |                    |

a. 0 células (,0%) esperavam uma contagem menor que 5. A contagem mínima esperada é 45,37.

b. Computado apenas para uma tabela 2x2

### Medidas Simétricas

|                     |             | Valor | Significância Aproximada |
|---------------------|-------------|-------|--------------------------|
| Nominal por Nominal | Fi          | -,040 | ,143                     |
|                     | V de Cramer | ,040  | ,143                     |
| N de Casos Válidos  |             | 1313  |                          |

### Estimativa de Risco

|                                                                           | Valor | Intervalo de confiança de 95% |          |
|---------------------------------------------------------------------------|-------|-------------------------------|----------|
|                                                                           |       | Inferior                      | Superior |
| Razão de Chances para The institution is a university hospital (No / Yes) | ,761  | ,528                          | 1,097    |
| Para grupo OLBI Score Classification = Low to Moderate                    | ,907  | ,788                          | 1,043    |
| Para grupo OLBI Score Classification = High                               | 1,191 | ,951                          | 1,493    |
| N de Casos Válidos                                                        | 1313  |                               |          |

Classification of the percieved autonomy to self-conduct in the residency program \* DASS21 Classification - Depression (dichotomous)

## Crosstab

|                                                                                   |                           |                                                                                        | DASS21 Classification - Depression<br>(dichotomous) |                        | Total  |
|-----------------------------------------------------------------------------------|---------------------------|----------------------------------------------------------------------------------------|-----------------------------------------------------|------------------------|--------|
|                                                                                   |                           |                                                                                        | Normal                                              | Abnormal<br>(elevated) |        |
| Classification of the perceived autonomy to self-conduct in the residency program | Low autonomy              | Contagem                                                                               | 104                                                 | 120                    | 224    |
|                                                                                   |                           | % em Classification of the perceived autonomy to self-conduct in the residency program | 46,4%                                               | 53,6%                  | 100,0% |
|                                                                                   |                           | % do Total                                                                             | 7,9%                                                | 9,1%                   | 17,1%  |
|                                                                                   | Moderate to high autonomy | Contagem                                                                               | 766                                                 | 323                    | 1089   |
|                                                                                   |                           | % em Classification of the perceived autonomy to self-conduct in the residency program | 70,3%                                               | 29,7%                  | 100,0% |
|                                                                                   |                           | % do Total                                                                             | 58,3%                                               | 24,6%                  | 82,9%  |
|                                                                                   | Total                     | Contagem                                                                               | 870                                                 | 443                    | 1313   |
|                                                                                   |                           | % em Classification of the perceived autonomy to self-conduct in the residency program | 66,3%                                               | 33,7%                  | 100,0% |
|                                                                                   |                           | % do Total                                                                             | 66,3%                                               | 33,7%                  | 100,0% |

## Testes qui-quadrado

|                                       | Valor               | gl | Significância Assintótica (Bilateral) | Sig exata (2 lados) | Sig exata (1 lado) |
|---------------------------------------|---------------------|----|---------------------------------------|---------------------|--------------------|
| Qui-quadrado de Pearson               | 47,514 <sup>a</sup> | 1  | ,000                                  |                     |                    |
| Correção de continuidade <sup>b</sup> | 46,450              | 1  | ,000                                  |                     |                    |
| Razão de verossimilhança              | 45,264              | 1  | ,000                                  |                     |                    |
| Teste Exato de Fisher                 |                     |    |                                       | ,000                | ,000               |
| Associação Linear por Linear          | 47,478              | 1  | ,000                                  |                     |                    |
| N de Casos Válidos                    | 1313                |    |                                       |                     |                    |

a. 0 células (,0%) esperavam uma contagem menor que 5. A contagem mínima esperada é 75,58.

b. Computado apenas para uma tabela 2x2

## Medidas Simétricas

|                     |             | Valor | Significância Aproximada |
|---------------------|-------------|-------|--------------------------|
| Nominal por Nominal | Fi          | -,190 | ,000                     |
|                     | V de Cramer | ,190  | ,000                     |
| N de Casos Válidos  |             | 1313  |                          |

## Estimativa de Risco

| Valor | Intervalo de confiança de 95% |
|-------|-------------------------------|
|-------|-------------------------------|

|                                                                                                                                                                |       | Inferior | Superior |
|----------------------------------------------------------------------------------------------------------------------------------------------------------------|-------|----------|----------|
| Razão de Chances para<br>Classification of the percieved<br>autonomy to self-conduct in the<br>residency program (Low autonomy<br>/ Moderate to high autonomy) | ,365  | ,273     | ,490     |
| Para grupo DASS21 Classification<br>- Depression (dichotomous) =<br>Normal                                                                                     | ,660  | ,570     | ,764     |
| Para grupo DASS21 Classification<br>- Depression (dichotomous) =<br>Abnormal (elevated)                                                                        | 1,806 | 1,551    | 2,104    |
| N de Casos Válidos                                                                                                                                             | 1313  |          |          |

Classification of the percieved autonomy to self-conduct in the residency program \* DASS21 Classification  
- Anxiety (dichotomous)

#### Crosstab

|                                                                                         |                                                                                              |                                                                                              | DASS21 Classification - Anxiety<br>(dichotomous) |                        | Total  |
|-----------------------------------------------------------------------------------------|----------------------------------------------------------------------------------------------|----------------------------------------------------------------------------------------------|--------------------------------------------------|------------------------|--------|
|                                                                                         |                                                                                              |                                                                                              | Normal                                           | Abnormal<br>(elevated) |        |
| Classification of the percieved<br>autonomy to self-conduct in the<br>residency program | Low autonomy                                                                                 | Contagem                                                                                     | 119                                              | 105                    | 224    |
|                                                                                         |                                                                                              | % em Classification of the<br>percieved autonomy to self-conduct<br>in the residency program | 53,1%                                            | 46,9%                  | 100,0% |
|                                                                                         |                                                                                              | % do Total                                                                                   | 9,1%                                             | 8,0%                   | 17,1%  |
|                                                                                         | Moderate to high autonomy                                                                    | Contagem                                                                                     | 742                                              | 347                    | 1089   |
|                                                                                         |                                                                                              | % em Classification of the<br>percieved autonomy to self-conduct<br>in the residency program | 68,1%                                            | 31,9%                  | 100,0% |
|                                                                                         |                                                                                              | % do Total                                                                                   | 56,5%                                            | 26,4%                  | 82,9%  |
| Total                                                                                   | Contagem                                                                                     |                                                                                              | 861                                              | 452                    | 1313   |
|                                                                                         | % em Classification of the<br>percieved autonomy to self-conduct<br>in the residency program |                                                                                              | 65,6%                                            | 34,4%                  | 100,0% |
|                                                                                         | % do Total                                                                                   |                                                                                              | 65,6%                                            | 34,4%                  | 100,0% |

#### Testes qui-quadrado

| Valor | gl | Significância<br>Assintótica<br>(Bilateral) | Sig exata (2 lados) | Sig exata (1 lado) |
|-------|----|---------------------------------------------|---------------------|--------------------|
|-------|----|---------------------------------------------|---------------------|--------------------|

|                                       |                     |   |      |      |      |
|---------------------------------------|---------------------|---|------|------|------|
| Qui-quadrado de Pearson               | 18,544 <sup>a</sup> | 1 | ,000 |      |      |
| Correção de continuidade <sup>b</sup> | 17,885              | 1 | ,000 |      |      |
| Razão de verossimilhança              | 17,920              | 1 | ,000 |      |      |
| Teste Exato de Fisher                 |                     |   |      | ,000 | ,000 |
| Associação Linear por Linear          | 18,530              | 1 | ,000 |      |      |
| N de Casos Válidos                    | 1313                |   |      |      |      |

a. 0 células (,0%) esperavam uma contagem menor que 5. A contagem mínima esperada é 77,11.

b. Computado apenas para uma tabela 2x2

### Medidas Simétricas

|                     |             | Valor | Significância Aproximada |
|---------------------|-------------|-------|--------------------------|
| Nominal por Nominal | Fi          | -,119 | ,000                     |
|                     | V de Cramer | ,119  | ,000                     |
| N de Casos Válidos  |             | 1313  |                          |

### Estimativa de Risco

|                                                                                                                                                    | Valor | Intervalo de confiança de 95% |          |
|----------------------------------------------------------------------------------------------------------------------------------------------------|-------|-------------------------------|----------|
|                                                                                                                                                    |       | Inferior                      | Superior |
| Razão de Chances para Classification of the percieved autonomy to self-conduct in the residency program (Low autonomy / Moderate to high autonomy) | ,530  | ,396                          | ,710     |
| Para grupo DASS21 Classification - Anxiety (dichotomous) = Normal                                                                                  | ,780  | ,685                          | ,888     |
| Para grupo DASS21 Classification - Anxiety (dichotomous) = Abnormal (elevated)                                                                     | 1,471 | 1,248                         | 1,734    |
| N de Casos Válidos                                                                                                                                 | 1313  |                               |          |

Classification of the percieved autonomy to self-conduct in the residency program \* DASS21 Classification - Stress (dichotomous)

### Crosstab

|                                 |              | DASS21 Classification - Stress (dichotomous) |                     | Total |
|---------------------------------|--------------|----------------------------------------------|---------------------|-------|
|                                 |              | Normal                                       | Abnormal (elevated) |       |
| Classification of the percieved | Low autonomy | Contagem                                     |                     |       |
|                                 |              | 147                                          | 77                  | 224   |

|                                                   |                                                                                        |       |       |        |
|---------------------------------------------------|----------------------------------------------------------------------------------------|-------|-------|--------|
| autonomy to self-conduct in the residency program | % em Classification of the percieved autonomy to self-conduct in the residency program | 65,6% | 34,4% | 100,0% |
|                                                   | % do Total                                                                             | 11,2% | 5,9%  | 17,1%  |
|                                                   | Contagem                                                                               | 865   | 224   | 1089   |
| Moderate to high autonomy                         | % em Classification of the percieved autonomy to self-conduct in the residency program | 79,4% | 20,6% | 100,0% |
|                                                   | % do Total                                                                             | 65,9% | 17,1% | 82,9%  |
|                                                   | Contagem                                                                               | 1012  | 301   | 1313   |
| Total                                             | % em Classification of the percieved autonomy to self-conduct in the residency program | 77,1% | 22,9% | 100,0% |
|                                                   | % do Total                                                                             | 77,1% | 22,9% | 100,0% |
|                                                   | Contagem                                                                               | 1012  | 301   | 1313   |

### Testes qui-quadrado

|                                       | Valor               | gl | Significância Assintótica (Bilateral) | Sig exata (2 lados) | Sig exata (1 lado) |
|---------------------------------------|---------------------|----|---------------------------------------|---------------------|--------------------|
| Qui-quadrado de Pearson               | 20,041 <sup>a</sup> | 1  | ,000                                  |                     |                    |
| Correção de continuidade <sup>b</sup> | 19,267              | 1  | ,000                                  |                     |                    |
| Razão de verossimilhança              | 18,611              | 1  | ,000                                  |                     |                    |
| Teste Exato de Fisher                 |                     |    |                                       | ,000                | ,000               |
| Associação Linear por Linear          | 20,025              | 1  | ,000                                  |                     |                    |
| N de Casos Válidos                    | 1313                |    |                                       |                     |                    |

a. 0 células (,0%) esperavam uma contagem menor que 5. A contagem mínima esperada é 51,35.

b. Computado apenas para uma tabela 2x2

### Medidas Simétricas

|                     |             | Valor | Significância Aproximada |
|---------------------|-------------|-------|--------------------------|
| Nominal por Nominal | Fi          | ,124  | ,000                     |
|                     | V de Cramer | ,124  | ,000                     |
| N de Casos Válidos  |             | 1313  |                          |

### Estimativa de Risco

|                                                                                                                                                    | Valor | Intervalo de confiança de 95% |          |
|----------------------------------------------------------------------------------------------------------------------------------------------------|-------|-------------------------------|----------|
|                                                                                                                                                    |       | Inferior                      | Superior |
| Razão de Chances para Classification of the percieved autonomy to self-conduct in the residency program (Low autonomy / Moderate to high autonomy) | ,494  | ,362                          | ,676     |

|                                                                                     |       |       |       |
|-------------------------------------------------------------------------------------|-------|-------|-------|
| Para grupo DASS21 Classification<br>- Stress (dichotomous) = Normal                 | ,826  | ,748  | ,913  |
| Para grupo DASS21 Classification<br>- Stress (dichotomous) =<br>Abnormal (elevated) | 1,671 | 1,347 | 2,073 |
| N de Casos Válidos                                                                  | 1313  |       |       |

Classification of the percieved autonomy to self-conduct in the residency program \* PHQ9 Depression Classification - Risk estimate for having current major depressive disorder

### Crosstab

|                                                                                         |                           |                                                                                              | PHQ9 Depression Classification - Risk<br>estimate for having current major<br>depressive disorder |       |        |
|-----------------------------------------------------------------------------------------|---------------------------|----------------------------------------------------------------------------------------------|---------------------------------------------------------------------------------------------------|-------|--------|
|                                                                                         |                           |                                                                                              | Low                                                                                               | High  | Total  |
| Classification of the percieved<br>autonomy to self-conduct in the<br>residency program | Low autonomy              | Contagem                                                                                     | 46                                                                                                | 178   | 224    |
|                                                                                         |                           | % em Classification of the<br>percieved autonomy to self-conduct<br>in the residency program | 20,5%                                                                                             | 79,5% | 100,0% |
|                                                                                         |                           | % do Total                                                                                   | 3,5%                                                                                              | 13,6% | 17,1%  |
|                                                                                         | Moderate to high autonomy | Contagem                                                                                     | 383                                                                                               | 706   | 1089   |
|                                                                                         |                           | % em Classification of the<br>percieved autonomy to self-conduct<br>in the residency program | 35,2%                                                                                             | 64,8% | 100,0% |
|                                                                                         |                           | % do Total                                                                                   | 29,2%                                                                                             | 53,8% | 82,9%  |
|                                                                                         | Total                     | Contagem                                                                                     | 429                                                                                               | 884   | 1313   |
|                                                                                         |                           | % em Classification of the<br>percieved autonomy to self-conduct<br>in the residency program | 32,7%                                                                                             | 67,3% | 100,0% |
|                                                                                         |                           | % do Total                                                                                   | 32,7%                                                                                             | 67,3% | 100,0% |

### Testes qui-quadrado

|                                       | Valor               | gl | Significância<br>Assintótica<br>(Bilateral) | Sig exata (2 lados) | Sig exata (1 lado) |
|---------------------------------------|---------------------|----|---------------------------------------------|---------------------|--------------------|
| Qui-quadrado de Pearson               | 18,087 <sup>a</sup> | 1  | ,000                                        |                     |                    |
| Correção de continuidade <sup>b</sup> | 17,428              | 1  | ,000                                        |                     |                    |
| Razão de verossimilhança              | 19,330              | 1  | ,000                                        |                     |                    |
| Teste Exato de Fisher                 |                     |    |                                             | ,000                | ,000               |
| Associação Linear por Linear          | 18,073              | 1  | ,000                                        |                     |                    |
| N de Casos Válidos                    | 1313                |    |                                             |                     |                    |

a. 0 células (,0%) esperavam uma contagem menor que 5. A contagem mínima esperada é 73,19.

b. Computado apenas para uma tabela 2x2

Medidas Simétricas

|                     |             | Valor | Significância Aproximada |
|---------------------|-------------|-------|--------------------------|
| Nominal por Nominal | Fi          | -,117 | ,000                     |
|                     | V de Cramer | ,117  | ,000                     |
| N de Casos Válidos  |             | 1313  |                          |

Estimativa de Risco

|                                                                                                                                                    | Valor | Intervalo de confiança de 95% |          |
|----------------------------------------------------------------------------------------------------------------------------------------------------|-------|-------------------------------|----------|
|                                                                                                                                                    |       | Inferior                      | Superior |
| Razão de Chances para Classification of the percieved autonomy to self-conduct in the residency program (Low autonomy / Moderate to high autonomy) | ,476  | ,337                          | ,674     |
| Para grupo PHQ9 Depression Classification - Risk estimate for having current major depressive disorder = Low                                       | ,584  | ,446                          | ,765     |
| Para grupo PHQ9 Depression Classification - Risk estimate for having current major depressive disorder = High                                      | 1,226 | 1,132                         | 1,327    |
| N de Casos Válidos                                                                                                                                 | 1313  |                               |          |

Classification of the percieved autonomy to self-conduct in the residency program \* BRCS Classification

Crosstab

|                                                                                   |                           |                                                                                        | BRCS Classification |                  | Total  |
|-----------------------------------------------------------------------------------|---------------------------|----------------------------------------------------------------------------------------|---------------------|------------------|--------|
|                                                                                   |                           |                                                                                        | Low resilience      | Moderate to High |        |
| Classification of the percieved autonomy to self-conduct in the residency program | Low autonomy              | Contagem                                                                               | 168                 | 56               | 224    |
|                                                                                   |                           | % em Classification of the percieved autonomy to self-conduct in the residency program | 75,0%               | 25,0%            | 100,0% |
|                                                                                   |                           | % do Total                                                                             | 12,8%               | 4,3%             | 17,1%  |
|                                                                                   | Moderate to high autonomy | Contagem                                                                               | 645                 | 444              | 1089   |
|                                                                                   |                           | % em Classification of the percieved autonomy to self-conduct in the residency program | 59,2%               | 40,8%            | 100,0% |
|                                                                                   |                           |                                                                                        |                     |                  |        |

|       |  |            |                                                                                              |        |        |
|-------|--|------------|----------------------------------------------------------------------------------------------|--------|--------|
|       |  | % do Total | 49,1%                                                                                        | 33,8%  | 82,9%  |
| Total |  |            | Contagem                                                                                     | 813    | 500    |
|       |  |            | % em Classification of the<br>percieved autonomy to self-conduct<br>in the residency program | 61,9%  | 38,1%  |
|       |  |            | % do Total                                                                                   | 61,9%  | 38,1%  |
|       |  |            |                                                                                              | 100,0% | 100,0% |

### Testes qui-quadrado

|                                       | Valor               | gl | Significância<br>Assintótica<br>(Bilateral) | Sig exata (2 lados) | Sig exata (1 lado) |
|---------------------------------------|---------------------|----|---------------------------------------------|---------------------|--------------------|
| Qui-quadrado de Pearson               | 19,598 <sup>a</sup> | 1  | ,000                                        |                     |                    |
| Correção de continuidade <sup>b</sup> | 18,935              | 1  | ,000                                        |                     |                    |
| Razão de verossimilhança              | 20,579              | 1  | ,000                                        |                     |                    |
| Teste Exato de Fisher                 |                     |    |                                             | ,000                | ,000               |
| Associação Linear por Linear          | 19,583              | 1  | ,000                                        |                     |                    |
| N de Casos Válidos                    | 1313                |    |                                             |                     |                    |

a. 0 células (,0%) esperavam uma contagem menor que 5. A contagem mínima esperada é 85,30.

b. Computado apenas para uma tabela 2x2

### Medidas Simétricas

|                     |             | Valor | Significância<br>Aproximada |
|---------------------|-------------|-------|-----------------------------|
| Nominal por Nominal | Fi          | ,122  | ,000                        |
|                     | V de Cramer | ,122  | ,000                        |
| N de Casos Válidos  |             | 1313  |                             |

### Estimativa de Risco

|                                                                                                                                                                | Valor | Intervalo de confiança de 95% |          |
|----------------------------------------------------------------------------------------------------------------------------------------------------------------|-------|-------------------------------|----------|
|                                                                                                                                                                |       | Inferior                      | Superior |
| Razão de Chances para<br>Classification of the percieved<br>autonomy to self-conduct in the<br>residency program (Low autonomy<br>/ Moderate to high autonomy) | 2,065 | 1,491                         | 2,860    |
| Para grupo BRCS Classification =<br>Low resilience                                                                                                             | 1,266 | 1,157                         | 1,386    |
| Para grupo BRCS Classification =<br>Moderate to High                                                                                                           | ,613  | ,483                          | ,778     |
| N de Casos Válidos                                                                                                                                             | 1313  |                               |          |

Classification of the perceived autonomy to self-conduct in the residency program \* OLBI Score Classification

### Crosstab

|                                                                                   |                                                                                        |                                                                                        | OLBI Score Classification |       | Total  |
|-----------------------------------------------------------------------------------|----------------------------------------------------------------------------------------|----------------------------------------------------------------------------------------|---------------------------|-------|--------|
|                                                                                   |                                                                                        |                                                                                        | Low to Moderate           | High  |        |
| Classification of the perceived autonomy to self-conduct in the residency program | Low autonomy                                                                           | Contagem                                                                               | 92                        | 132   | 224    |
|                                                                                   |                                                                                        | % em Classification of the perceived autonomy to self-conduct in the residency program | 41,1%                     | 58,9% | 100,0% |
|                                                                                   |                                                                                        | % do Total                                                                             | 7,0%                      | 10,1% | 17,1%  |
|                                                                                   | Moderate to high autonomy                                                              | Contagem                                                                               | 783                       | 306   | 1089   |
|                                                                                   |                                                                                        | % em Classification of the perceived autonomy to self-conduct in the residency program | 71,9%                     | 28,1% | 100,0% |
|                                                                                   |                                                                                        | % do Total                                                                             | 59,6%                     | 23,3% | 82,9%  |
| Total                                                                             | Contagem                                                                               |                                                                                        | 875                       | 438   | 1313   |
|                                                                                   | % em Classification of the perceived autonomy to self-conduct in the residency program |                                                                                        | 66,6%                     | 33,4% | 100,0% |
|                                                                                   |                                                                                        |                                                                                        |                           |       |        |
|                                                                                   | % do Total                                                                             |                                                                                        | 66,6%                     | 33,4% | 100,0% |

### Testes qui-quadrado

|                                       | Valor               | gl | Significância Assintótica (Bilateral) | Sig exata (2 lados) | Sig exata (1 lado) |
|---------------------------------------|---------------------|----|---------------------------------------|---------------------|--------------------|
| Qui-quadrado de Pearson               | 79,431 <sup>a</sup> | 1  | ,000                                  |                     |                    |
| Correção de continuidade <sup>b</sup> | 78,050              | 1  | ,000                                  |                     |                    |
| Razão de verossimilhança              | 75,112              | 1  | ,000                                  |                     |                    |
| Teste Exato de Fisher                 |                     |    |                                       | ,000                | ,000               |
| Associação Linear por Linear          | 79,370              | 1  | ,000                                  |                     |                    |
| N de Casos Válidos                    | 1313                |    |                                       |                     |                    |

a. 0 células (,0%) esperavam uma contagem menor que 5. A contagem mínima esperada é 74,72.

b. Computado apenas para uma tabela 2x2

### Medidas Simétricas

|                     |             | Valor | Significância Aproximada |
|---------------------|-------------|-------|--------------------------|
| Nominal por Nominal | Fi          | -,246 | ,000                     |
|                     | V de Cramer | ,246  | ,000                     |

|                    |      |
|--------------------|------|
| N de Casos Válidos | 1313 |
|--------------------|------|

### Estimativa de Risco

|                                                                                                                                                                | Valor | Intervalo de confiança de 95% |          |
|----------------------------------------------------------------------------------------------------------------------------------------------------------------|-------|-------------------------------|----------|
|                                                                                                                                                                |       | Inferior                      | Superior |
| Razão de Chances para<br>Classification of the percieved<br>autonomy to self-conduct in the<br>residency program (Low autonomy<br>/ Moderate to high autonomy) | ,272  | ,202                          | ,367     |
| Para grupo OLBI Score<br>Classification = Low to Moderate                                                                                                      | ,571  | ,486                          | ,671     |
| Para grupo OLBI Score<br>Classification = High                                                                                                                 | 2,097 | 1,814                         | 2,424    |
| N de Casos Válidos                                                                                                                                             | 1313  |                               |          |

Percieved adequacy of the pedagogic structure and availability of resouces in the residency program \*  
DASS21 Classification - Depression (dichotomous)

### Crosstab

|                                                                                                              |                           |                                                                                                                   | DASS21 Classification - Depression<br>(dichotomous) |                        |        |
|--------------------------------------------------------------------------------------------------------------|---------------------------|-------------------------------------------------------------------------------------------------------------------|-----------------------------------------------------|------------------------|--------|
|                                                                                                              |                           |                                                                                                                   | Normal                                              | Abnormal<br>(elevated) | Total  |
| Percieved adequacy of the<br>pedagogic structure and availability<br>of resouces in the residency<br>program | Poor adequacy             | Contagem                                                                                                          | 309                                                 | 249                    | 558    |
|                                                                                                              |                           | % em Percieved adequacy of the<br>pedagogic structure and availability<br>of resouces in the residency<br>program | 55,4%                                               | 44,6%                  | 100,0% |
|                                                                                                              |                           | % do Total                                                                                                        | 23,5%                                               | 19,0%                  | 42,5%  |
|                                                                                                              | Moderate to good adequacy | Contagem                                                                                                          | 561                                                 | 194                    | 755    |
|                                                                                                              |                           | % em Percieved adequacy of the<br>pedagogic structure and availability<br>of resouces in the residency<br>program | 74,3%                                               | 25,7%                  | 100,0% |
|                                                                                                              |                           | % do Total                                                                                                        | 42,7%                                               | 14,8%                  | 57,5%  |
|                                                                                                              | Total                     | Contagem                                                                                                          | 870                                                 | 443                    | 1313   |
|                                                                                                              |                           | % em Percieved adequacy of the<br>pedagogic structure and availability<br>of resouces in the residency<br>program | 66,3%                                               | 33,7%                  | 100,0% |
| % do Total                                                                                                   |                           | 66,3%                                                                                                             | 33,7%                                               | 100,0%                 |        |

### Testes qui-quadrado

|                                       | Valor               | gl | Significância<br>Assintótica<br>(Bilateral) | Sig exata (2 lados) | Sig exata (1 lado) |
|---------------------------------------|---------------------|----|---------------------------------------------|---------------------|--------------------|
| Qui-quadrado de Pearson               | 51,422 <sup>a</sup> | 1  | ,000                                        |                     |                    |
| Correção de continuidade <sup>b</sup> | 50,578              | 1  | ,000                                        |                     |                    |
| Razão de verossimilhança              | 51,226              | 1  | ,000                                        |                     |                    |
| Teste Exato de Fisher                 |                     |    |                                             | ,000                | ,000               |
| Associação Linear por Linear          | 51,382              | 1  | ,000                                        |                     |                    |
| N de Casos Válidos                    | 1313                |    |                                             |                     |                    |

a. 0 células (,0%) esperavam uma contagem menor que 5. A contagem mínima esperada é 188,27.

b. Computado apenas para uma tabela 2x2

### Medidas Simétricas

|                     |             | Valor | Significância<br>Aproximada |
|---------------------|-------------|-------|-----------------------------|
| Nominal por Nominal | Fi          | -,198 | ,000                        |
|                     | V de Cramer | ,198  | ,000                        |
| N de Casos Válidos  |             | 1313  |                             |

### Estimativa de Risco

|                                                                                                                                                                                          | Valor | Intervalo de confiança de 95% |          |
|------------------------------------------------------------------------------------------------------------------------------------------------------------------------------------------|-------|-------------------------------|----------|
|                                                                                                                                                                                          |       | Inferior                      | Superior |
| Razão de Chances para<br>Perceived adequacy of the<br>pedagogic structure and<br>availability of resources in the<br>residency program (Poor<br>adequacy / Moderate to good<br>adequacy) | ,429  | ,340                          | ,542     |
| Para grupo DASS21 Classification<br>- Depression (dichotomous) =<br>Normal                                                                                                               | ,745  | ,684                          | ,812     |
| Para grupo DASS21 Classification<br>- Depression (dichotomous) =<br>Abnormal (elevated)                                                                                                  | 1,737 | 1,491                         | 2,023    |
| N de Casos Válidos                                                                                                                                                                       | 1313  |                               |          |

Perceived adequacy of the pedagogic structure and availability of resources in the residency program \*  
DASS21 Classification - Anxiety (dichotomous)

### Crosstab

|                                                                                                              |                                                                                                                   |                                                                                                                   | DASS21 Classification - Anxiety<br>(dichotomous) |                        |        |
|--------------------------------------------------------------------------------------------------------------|-------------------------------------------------------------------------------------------------------------------|-------------------------------------------------------------------------------------------------------------------|--------------------------------------------------|------------------------|--------|
|                                                                                                              |                                                                                                                   |                                                                                                                   | Normal                                           | Abnormal<br>(elevated) | Total  |
| Percieved adequacy of the<br>pedagogic structure and availability<br>of resouces in the residency<br>program | Poor adequacy                                                                                                     | Contagem                                                                                                          | 313                                              | 245                    | 558    |
|                                                                                                              |                                                                                                                   | % em Percieved adequacy of the<br>pedagogic structure and availability<br>of resouces in the residency<br>program | 56,1%                                            | 43,9%                  | 100,0% |
|                                                                                                              |                                                                                                                   | % do Total                                                                                                        | 23,8%                                            | 18,7%                  | 42,5%  |
|                                                                                                              | Moderate to good adequacy                                                                                         | Contagem                                                                                                          | 548                                              | 207                    | 755    |
|                                                                                                              |                                                                                                                   | % em Percieved adequacy of the<br>pedagogic structure and availability<br>of resouces in the residency<br>program | 72,6%                                            | 27,4%                  | 100,0% |
|                                                                                                              |                                                                                                                   | % do Total                                                                                                        | 41,7%                                            | 15,8%                  | 57,5%  |
| Total                                                                                                        | Contagem                                                                                                          |                                                                                                                   | 861                                              | 452                    | 1313   |
|                                                                                                              | % em Percieved adequacy of the<br>pedagogic structure and availability<br>of resouces in the residency<br>program |                                                                                                                   | 65,6%                                            | 34,4%                  | 100,0% |
|                                                                                                              | % do Total                                                                                                        |                                                                                                                   | 65,6%                                            | 34,4%                  | 100,0% |

### Testes qui-quadrado

|                                       | Valor               | gl | Significância<br>Assintótica<br>(Bilateral) | Sig exata (2 lados) | Sig exata (1 lado) |
|---------------------------------------|---------------------|----|---------------------------------------------|---------------------|--------------------|
| Qui-quadrado de Pearson               | 38,648 <sup>a</sup> | 1  | ,000                                        |                     |                    |
| Correção de continuidade <sup>b</sup> | 37,921              | 1  | ,000                                        |                     |                    |
| Razão de verossimilhança              | 38,491              | 1  | ,000                                        |                     |                    |
| Teste Exato de Fisher                 |                     |    |                                             | ,000                | ,000               |
| Associação Linear por Linear          | 38,618              | 1  | ,000                                        |                     |                    |
| N de Casos Válidos                    | 1313                |    |                                             |                     |                    |

a. 0 células (,0%) esperavam uma contagem menor que 5. A contagem mínima esperada é 192,09.

b. Computado apenas para uma tabela 2x2

### Medidas Simétricas

|                     |             | Valor | Significância<br>Aproximada |
|---------------------|-------------|-------|-----------------------------|
| Nominal por Nominal | Fi          | -,172 | ,000                        |
|                     | V de Cramer | ,172  | ,000                        |

|                    |      |
|--------------------|------|
| N de Casos Válidos | 1313 |
|--------------------|------|

### Estimativa de Risco

|                                                                                                                                                                                         | Valor | Intervalo de confiança de 95% |          |
|-----------------------------------------------------------------------------------------------------------------------------------------------------------------------------------------|-------|-------------------------------|----------|
|                                                                                                                                                                                         |       | Inferior                      | Superior |
| Razão de Chances para<br>Percieved adequacy of the<br>pedagogic structure and<br>availability of resouces in the<br>residency program (Poor<br>adequacy / Moderate to good<br>adequacy) | ,483  | ,383                          | ,608     |
| Para grupo DASS21 Classification<br>- Anxiety (dichotomous) = Normal                                                                                                                    | ,773  | ,709                          | ,842     |
| Para grupo DASS21 Classification<br>- Anxiety (dichotomous) =<br>Abnormal (elevated)                                                                                                    | 1,601 | 1,379                         | 1,859    |
| N de Casos Válidos                                                                                                                                                                      | 1313  |                               |          |

Percieved adequacy of the pedagogic structure and availability of resouces in the residency program \*  
DASS21 Classification - Stress (dichotomous)

### Crosstab

|                                                                                                     |                           |                                                                                                          | DASS21 Classification - Stress<br>(dichotomous) |                        |        |
|-----------------------------------------------------------------------------------------------------|---------------------------|----------------------------------------------------------------------------------------------------------|-------------------------------------------------|------------------------|--------|
|                                                                                                     |                           |                                                                                                          | Normal                                          | Abnormal<br>(elevated) | Total  |
| Percieved adequacy of the pedagogic structure and availability of resouces in the residency program | Poor adequacy             | Contagem                                                                                                 | 370                                             | 188                    | 558    |
|                                                                                                     |                           | % em Percieved adequacy of the pedagogic structure and availability of resouces in the residency program | 66,3%                                           | 33,7%                  | 100,0% |
|                                                                                                     |                           | % do Total                                                                                               | 28,2%                                           | 14,3%                  | 42,5%  |
|                                                                                                     | Moderate to good adequacy | Contagem                                                                                                 | 642                                             | 113                    | 755    |
|                                                                                                     |                           | % em Percieved adequacy of the pedagogic structure and availability of resouces in the residency program | 85,0%                                           | 15,0%                  | 100,0% |
|                                                                                                     |                           | % do Total                                                                                               | 48,9%                                           | 8,6%                   | 57,5%  |
| Total                                                                                               |                           | Contagem                                                                                                 | 1012                                            | 301                    | 1313   |

|                                                                                                          |       |       |        |
|----------------------------------------------------------------------------------------------------------|-------|-------|--------|
| % em Percieved adequacy of the pedagogic structure and availability of resouces in the residency program | 77,1% | 22,9% | 100,0% |
| % do Total                                                                                               | 77,1% | 22,9% | 100,0% |

### Testes qui-quadrado

|                                       | Valor               | gl | Significância Assintótica (Bilateral) | Sig exata (2 lados) | Sig exata (1 lado) |
|---------------------------------------|---------------------|----|---------------------------------------|---------------------|--------------------|
| Qui-quadrado de Pearson               | 63,670 <sup>a</sup> | 1  | ,000                                  |                     |                    |
| Correção de continuidade <sup>b</sup> | 62,615              | 1  | ,000                                  |                     |                    |
| Razão de verossimilhança              | 63,230              | 1  | ,000                                  |                     |                    |
| Teste Exato de Fisher                 |                     |    |                                       | ,000                | ,000               |
| Associação Linear por Linear          | 63,622              | 1  | ,000                                  |                     |                    |
| N de Casos Válidos                    | 1313                |    |                                       |                     |                    |

a. 0 células (,0%) esperavam uma contagem menor que 5. A contagem mínima esperada é 127,92.

b. Computado apenas para uma tabela 2x2

### Medidas Simétricas

|                     |             | Valor | Significância Aproximada |
|---------------------|-------------|-------|--------------------------|
| Nominal por Nominal | Fi          | -,220 | ,000                     |
|                     | V de Cramer | ,220  | ,000                     |
| N de Casos Válidos  |             | 1313  |                          |

### Estimativa de Risco

|                                                                                                                                                                       | Valor | Intervalo de confiança de 95% |          |
|-----------------------------------------------------------------------------------------------------------------------------------------------------------------------|-------|-------------------------------|----------|
|                                                                                                                                                                       |       | Inferior                      | Superior |
| Razão de Chances para Percieved adequacy of the pedagogic structure and availability of resouces in the residency program (Poor adequacy / Moderate to good adequacy) | ,346  | ,265                          | ,452     |
| Para grupo DASS21 Classification - Stress (dichotomous) = Normal                                                                                                      | ,780  | ,730                          | ,833     |
| Para grupo DASS21 Classification - Stress (dichotomous) = Abnormal (elevated)                                                                                         | 2,251 | 1,832                         | 2,766    |
| N de Casos Válidos                                                                                                                                                    | 1313  |                               |          |

Percieved adequacy of the pedagogic structure and availability of resouces in the residency program \*  
PHQ9 Depression Classification - Risk estimate for having current major depressive disorder

### Crosstab

|                                                                                                              |                                                                                                                   |                                                                                                                   | PHQ9 Depression Classification - Risk<br>estimate for having current major<br>depressive disorder |       |        |
|--------------------------------------------------------------------------------------------------------------|-------------------------------------------------------------------------------------------------------------------|-------------------------------------------------------------------------------------------------------------------|---------------------------------------------------------------------------------------------------|-------|--------|
|                                                                                                              |                                                                                                                   |                                                                                                                   | Low                                                                                               | High  | Total  |
| Percieved adequacy of the<br>pedagogic structure and availability<br>of resouces in the residency<br>program | Poor adequacy                                                                                                     | Contagem                                                                                                          | 117                                                                                               | 441   | 558    |
|                                                                                                              |                                                                                                                   | % em Percieved adequacy of the<br>pedagogic structure and availability<br>of resouces in the residency<br>program | 21,0%                                                                                             | 79,0% | 100,0% |
|                                                                                                              |                                                                                                                   | % do Total                                                                                                        | 8,9%                                                                                              | 33,6% | 42,5%  |
|                                                                                                              | Moderate to good adequacy                                                                                         | Contagem                                                                                                          | 312                                                                                               | 443   | 755    |
|                                                                                                              |                                                                                                                   | % em Percieved adequacy of the<br>pedagogic structure and availability<br>of resouces in the residency<br>program | 41,3%                                                                                             | 58,7% | 100,0% |
|                                                                                                              |                                                                                                                   | % do Total                                                                                                        | 23,8%                                                                                             | 33,7% | 57,5%  |
| Total                                                                                                        | Contagem                                                                                                          |                                                                                                                   | 429                                                                                               | 884   | 1313   |
|                                                                                                              | % em Percieved adequacy of the<br>pedagogic structure and availability<br>of resouces in the residency<br>program |                                                                                                                   | 32,7%                                                                                             | 67,3% | 100,0% |
|                                                                                                              | % do Total                                                                                                        |                                                                                                                   | 32,7%                                                                                             | 67,3% | 100,0% |

### Testes qui-quadrado

|                                       | Valor               | gl | Significância<br>Assintótica<br>(Bilateral) | Sig exata (2 lados) | Sig exata (1 lado) |
|---------------------------------------|---------------------|----|---------------------------------------------|---------------------|--------------------|
| Qui-quadrado de Pearson               | 60,444 <sup>a</sup> | 1  | ,000                                        |                     |                    |
| Correção de continuidade <sup>b</sup> | 59,522              | 1  | ,000                                        |                     |                    |
| Razão de verossimilhança              | 62,308              | 1  | ,000                                        |                     |                    |
| Teste Exato de Fisher                 |                     |    |                                             | ,000                | ,000               |
| Associação Linear por Linear          | 60,398              | 1  | ,000                                        |                     |                    |
| N de Casos Válidos                    | 1313                |    |                                             |                     |                    |

a. 0 células (,0%) esperavam uma contagem menor que 5. A contagem mínima esperada é 182,32.

b. Computado apenas para uma tabela 2x2

### Medidas Simétricas

|                     |             | Valor | Significância Aproximada |
|---------------------|-------------|-------|--------------------------|
| Nominal por Nominal | Fi          | -,215 | ,000                     |
|                     | V de Cramer | ,215  | ,000                     |
| N de Casos Válidos  |             | 1313  |                          |

### Estimativa de Risco

|                                                                                                                                                                       | Valor | Intervalo de confiança de 95% |          |
|-----------------------------------------------------------------------------------------------------------------------------------------------------------------------|-------|-------------------------------|----------|
|                                                                                                                                                                       |       | Inferior                      | Superior |
| Razão de Chances para Percieved adequacy of the pedagogic structure and availability of resouces in the residency program (Poor adequacy / Moderate to good adequacy) | ,377  | ,293                          | ,484     |
| Para grupo PHQ9 Depression Classification - Risk estimate for having current major depressive disorder = Low                                                          | ,507  | ,423                          | ,609     |
| Para grupo PHQ9 Depression Classification - Risk estimate for having current major depressive disorder = High                                                         | 1,347 | 1,251                         | 1,450    |
| N de Casos Válidos                                                                                                                                                    | 1313  |                               |          |

Percieved adequacy of the pedagogic structure and availability of resouces in the residency program \*  
BRCS Classification

### Crosstab

|                                                                                                     |                           |                                                                                                          | BRCS Classification |                  | Total  |
|-----------------------------------------------------------------------------------------------------|---------------------------|----------------------------------------------------------------------------------------------------------|---------------------|------------------|--------|
|                                                                                                     |                           |                                                                                                          | Low resilience      | Moderate to High |        |
| Percieved adequacy of the pedagogic structure and availability of resouces in the residency program | Poor adequacy             | Contagem                                                                                                 | 398                 | 160              | 558    |
|                                                                                                     |                           | % em Percieved adequacy of the pedagogic structure and availability of resouces in the residency program | 71,3%               | 28,7%            | 100,0% |
|                                                                                                     |                           | % do Total                                                                                               | 30,3%               | 12,2%            | 42,5%  |
|                                                                                                     | Moderate to good adequacy | Contagem                                                                                                 | 415                 | 340              | 755    |
|                                                                                                     |                           | % em Percieved adequacy of the pedagogic structure and availability of resouces in the residency program | 55,0%               | 45,0%            | 100,0% |
|                                                                                                     |                           |                                                                                                          |                     |                  |        |

|       |                                                                                                          |       |       |        |
|-------|----------------------------------------------------------------------------------------------------------|-------|-------|--------|
|       | % do Total                                                                                               | 31,6% | 25,9% | 57,5%  |
| Total | Contagem                                                                                                 | 813   | 500   | 1313   |
|       | % em Percieved adequacy of the pedagogic structure and availability of resouces in the residency program | 61,9% | 38,1% | 100,0% |
|       | % do Total                                                                                               | 61,9% | 38,1% | 100,0% |

### Testes qui-quadrado

|                                       | Valor               | gl | Significância Assintótica (Bilateral) | Sig exata (2 lados) | Sig exata (1 lado) |
|---------------------------------------|---------------------|----|---------------------------------------|---------------------|--------------------|
| Qui-quadrado de Pearson               | 36,418 <sup>a</sup> | 1  | ,000                                  |                     |                    |
| Correção de continuidade <sup>b</sup> | 35,727              | 1  | ,000                                  |                     |                    |
| Razão de verossimilhança              | 36,964              | 1  | ,000                                  |                     |                    |
| Teste Exato de Fisher                 |                     |    |                                       | ,000                | ,000               |
| Associação Linear por Linear          | 36,390              | 1  | ,000                                  |                     |                    |
| N de Casos Válidos                    | 1313                |    |                                       |                     |                    |

a. 0 células (,0%) esperavam uma contagem menor que 5. A contagem mínima esperada é 212,49.

b. Computado apenas para uma tabela 2x2

### Medidas Simétricas

|                     |             | Valor | Significância Aproximada |
|---------------------|-------------|-------|--------------------------|
| Nominal por Nominal | Fi          | ,167  | ,000                     |
|                     | V de Cramer | ,167  | ,000                     |
| N de Casos Válidos  |             | 1313  |                          |

### Estimativa de Risco

|                                                                                                                                                                       | Valor | Intervalo de confiança de 95% |          |
|-----------------------------------------------------------------------------------------------------------------------------------------------------------------------|-------|-------------------------------|----------|
|                                                                                                                                                                       |       | Inferior                      | Superior |
| Razão de Chances para Percieved adequacy of the pedagogic structure and availability of resouces in the residency program (Poor adequacy / Moderate to good adequacy) | 2,038 | 1,615                         | 2,572    |
| Para grupo BRCS Classification = Low resilience                                                                                                                       | 1,298 | 1,194                         | 1,410    |
| Para grupo BRCS Classification = Moderate to High                                                                                                                     | ,637  | ,547                          | ,742     |
| N de Casos Válidos                                                                                                                                                    | 1313  |                               |          |

Percieved adequacy of the pedagogic structure and availability of resouces in the residency program \*  
OLBI Score Classification

### Crosstab

|                                                                                                     |                                                                                                          |                                                                                                          | OLBI Score Classification |       | Total  |
|-----------------------------------------------------------------------------------------------------|----------------------------------------------------------------------------------------------------------|----------------------------------------------------------------------------------------------------------|---------------------------|-------|--------|
|                                                                                                     |                                                                                                          |                                                                                                          | Low to Moderate           | High  |        |
| Percieved adequacy of the pedagogic structure and availability of resouces in the residency program | Poor adequacy                                                                                            | Contagem                                                                                                 | 278                       | 280   | 558    |
|                                                                                                     |                                                                                                          | % em Percieved adequacy of the pedagogic structure and availability of resouces in the residency program | 49,8%                     | 50,2% | 100,0% |
|                                                                                                     |                                                                                                          | % do Total                                                                                               | 21,2%                     | 21,3% | 42,5%  |
|                                                                                                     |                                                                                                          |                                                                                                          |                           |       |        |
|                                                                                                     | Moderate to good adequacy                                                                                | Contagem                                                                                                 | 597                       | 158   | 755    |
|                                                                                                     |                                                                                                          | % em Percieved adequacy of the pedagogic structure and availability of resouces in the residency program | 79,1%                     | 20,9% | 100,0% |
|                                                                                                     |                                                                                                          | % do Total                                                                                               | 45,5%                     | 12,0% | 57,5%  |
|                                                                                                     |                                                                                                          |                                                                                                          |                           |       |        |
| Total                                                                                               | Contagem                                                                                                 |                                                                                                          | 875                       | 438   | 1313   |
|                                                                                                     | % em Percieved adequacy of the pedagogic structure and availability of resouces in the residency program |                                                                                                          | 66,6%                     | 33,4% | 100,0% |
|                                                                                                     | % do Total                                                                                               |                                                                                                          | 66,6%                     | 33,4% | 100,0% |
|                                                                                                     |                                                                                                          |                                                                                                          |                           |       |        |

### Testes qui-quadrado

|                                       | Valor                | gl | Significância Assintótica (Bilateral) | Sig exata (2 lados) | Sig exata (1 lado) |
|---------------------------------------|----------------------|----|---------------------------------------|---------------------|--------------------|
| Qui-quadrado de Pearson               | 123,503 <sup>a</sup> | 1  | ,000                                  |                     |                    |
| Correção de continuidade <sup>b</sup> | 122,190              | 1  | ,000                                  |                     |                    |
| Razão de verossimilhança              | 123,788              | 1  | ,000                                  |                     |                    |
| Teste Exato de Fisher                 |                      |    |                                       | ,000                | ,000               |
| Associação Linear por Linear          | 123,409              | 1  | ,000                                  |                     |                    |
| N de Casos Válidos                    | 1313                 |    |                                       |                     |                    |

a. 0 células (,0%) esperavam uma contagem menor que 5. A contagem mínima esperada é 186,14.

b. Computado apenas para uma tabela 2x2

### Medidas Simétricas

|                     |             | Valor | Significância Aproximada |
|---------------------|-------------|-------|--------------------------|
| Nominal por Nominal | Fi          | -,307 | ,000                     |
|                     | V de Cramer | ,307  | ,000                     |
| N de Casos Válidos  |             | 1313  |                          |

### Estimativa de Risco

|                                                                                                                                                                                         | Valor | Intervalo de confiança de 95% |          |
|-----------------------------------------------------------------------------------------------------------------------------------------------------------------------------------------|-------|-------------------------------|----------|
|                                                                                                                                                                                         |       | Inferior                      | Superior |
| Razão de Chances para<br>Perceived adequacy of the<br>pedagogic structure and<br>availability of resouces in the<br>residency program (Poor<br>adequacy / Moderate to good<br>adequacy) | ,263  | ,206                          | ,335     |
| Para grupo OLBI Score<br>Classification = Low to Moderate                                                                                                                               | ,630  | ,575                          | ,690     |
| Para grupo OLBI Score<br>Classification = High                                                                                                                                          | 2,398 | 2,040                         | 2,818    |
| N de Casos Válidos                                                                                                                                                                      | 1313  |                               |          |

Perceived adequacy of the availability of personal protective equipment, when providing care for patients in the residency program \* DASS21 Classification - Depression (dichotomous)

### Crosstab

|                                                                                                                                                |               |                                                                                                                                                     | DASS21 Classification - Depression (dichotomous) |                     | Total  |
|------------------------------------------------------------------------------------------------------------------------------------------------|---------------|-----------------------------------------------------------------------------------------------------------------------------------------------------|--------------------------------------------------|---------------------|--------|
|                                                                                                                                                |               |                                                                                                                                                     | Normal                                           | Abnormal (elevated) |        |
| Perceived adequacy of the<br>availability of personal protective<br>equipment, when providing care<br>for patients in the residency<br>program | Poor adequacy | Contagem                                                                                                                                            | 135                                              | 146                 | 281    |
|                                                                                                                                                |               | % em Perceived adequacy of the<br>availability of personal protective<br>equipment, when providing care<br>for patients in the residency<br>program | 48,0%                                            | 52,0%               | 100,0% |
|                                                                                                                                                |               | % do Total                                                                                                                                          | 10,3%                                            | 11,1%               | 21,4%  |
|                                                                                                                                                | Good adequacy | Contagem                                                                                                                                            | 735                                              | 297                 | 1032   |
|                                                                                                                                                |               | % em Perceived adequacy of the<br>availability of personal protective<br>equipment, when providing care<br>for patients in the residency<br>program | 71,2%                                            | 28,8%               | 100,0% |

|       |                                                                                                                                         |       |       |        |
|-------|-----------------------------------------------------------------------------------------------------------------------------------------|-------|-------|--------|
|       | % do Total                                                                                                                              | 56,0% | 22,6% | 78,6%  |
| Total | Contagem                                                                                                                                | 870   | 443   | 1313   |
|       | % em Perceived adequacy of the availability of personal protective equipment, when providing care for patients in the residency program | 66,3% | 33,7% | 100,0% |
|       | % do Total                                                                                                                              | 66,3% | 33,7% | 100,0% |

### Testes qui-quadrado

|                                       | Valor               | gl | Significância Assintótica (Bilateral) | Sig exata (2 lados) | Sig exata (1 lado) |
|---------------------------------------|---------------------|----|---------------------------------------|---------------------|--------------------|
| Qui-quadrado de Pearson               | 53,075 <sup>a</sup> | 1  | ,000                                  |                     |                    |
| Correção de continuidade <sup>b</sup> | 52,043              | 1  | ,000                                  |                     |                    |
| Razão de verossimilhança              | 50,931              | 1  | ,000                                  |                     |                    |
| Teste Exato de Fisher                 |                     |    |                                       | ,000                | ,000               |
| Associação Linear por Linear          | 53,034              | 1  | ,000                                  |                     |                    |
| N de Casos Válidos                    | 1313                |    |                                       |                     |                    |

a. 0 células (,0%) esperavam uma contagem menor que 5. A contagem mínima esperada é 94,81.

b. Computado apenas para uma tabela 2x2

### Medidas Simétricas

|                     |             | Valor | Significância Aproximada |
|---------------------|-------------|-------|--------------------------|
| Nominal por Nominal | Fi          | -,201 | ,000                     |
|                     | V de Cramer | ,201  | ,000                     |
| N de Casos Válidos  |             | 1313  |                          |

### Estimativa de Risco

|                                                                                                                                                                                          | Valor | Intervalo de confiança de 95% |          |
|------------------------------------------------------------------------------------------------------------------------------------------------------------------------------------------|-------|-------------------------------|----------|
|                                                                                                                                                                                          |       | Inferior                      | Superior |
| Razão de Chances para Perceived adequacy of the availability of personal protective equipment, when providing care for patients in the residency program (Poor adequacy / Good adequacy) | ,374  | ,285                          | ,489     |
| Para grupo DASS21 Classification - Depression (dichotomous) = Normal                                                                                                                     | ,675  | ,594                          | ,766     |

|                                                                                         |       |       |       |
|-----------------------------------------------------------------------------------------|-------|-------|-------|
| Para grupo DASS21 Classification<br>- Depression (dichotomous) =<br>Abnormal (elevated) | 1,805 | 1,557 | 2,093 |
| N de Casos Válidos                                                                      | 1313  |       |       |

Perceived adequacy of the availability of personal protective equipment, when providing care for patients in the residency program \* DASS21 Classification - Anxiety (dichotomous)

### Crosstab

|                                                                                                                                                |                                                                                                                                                     |                                                                                                                                                     | DASS21 Classification - Anxiety<br>(dichotomous) |                        | Total  |
|------------------------------------------------------------------------------------------------------------------------------------------------|-----------------------------------------------------------------------------------------------------------------------------------------------------|-----------------------------------------------------------------------------------------------------------------------------------------------------|--------------------------------------------------|------------------------|--------|
|                                                                                                                                                |                                                                                                                                                     |                                                                                                                                                     | Normal                                           | Abnormal<br>(elevated) |        |
| Perceived adequacy of the<br>availability of personal protective<br>equipment, when providing care<br>for patients in the residency<br>program | Poor adequacy                                                                                                                                       | Contagem                                                                                                                                            | 151                                              | 130                    | 281    |
|                                                                                                                                                |                                                                                                                                                     | % em Perceived adequacy of the<br>availability of personal protective<br>equipment, when providing care<br>for patients in the residency<br>program | 53,7%                                            | 46,3%                  | 100,0% |
|                                                                                                                                                |                                                                                                                                                     | % do Total                                                                                                                                          | 11,5%                                            | 9,9%                   | 21,4%  |
|                                                                                                                                                | Good adequacy                                                                                                                                       | Contagem                                                                                                                                            | 710                                              | 322                    | 1032   |
|                                                                                                                                                |                                                                                                                                                     | % em Perceived adequacy of the<br>availability of personal protective<br>equipment, when providing care<br>for patients in the residency<br>program | 68,8%                                            | 31,2%                  | 100,0% |
|                                                                                                                                                |                                                                                                                                                     | % do Total                                                                                                                                          | 54,1%                                            | 24,5%                  | 78,6%  |
| Total                                                                                                                                          | Contagem                                                                                                                                            |                                                                                                                                                     | 861                                              | 452                    | 1313   |
|                                                                                                                                                | % em Perceived adequacy of the<br>availability of personal protective<br>equipment, when providing care<br>for patients in the residency<br>program |                                                                                                                                                     | 65,6%                                            | 34,4%                  | 100,0% |
|                                                                                                                                                | % do Total                                                                                                                                          |                                                                                                                                                     | 65,6%                                            | 34,4%                  | 100,0% |

### Testes qui-quadrado

|                                       | Valor               | gl | Significância<br>Assintótica<br>(Bilateral) | Sig exata (2 lados) | Sig exata (1 lado) |
|---------------------------------------|---------------------|----|---------------------------------------------|---------------------|--------------------|
| Qui-quadrado de Pearson               | 22,195 <sup>a</sup> | 1  | ,000                                        |                     |                    |
| Correção de continuidade <sup>b</sup> | 21,533              | 1  | ,000                                        |                     |                    |
| Razão de verossimilhança              | 21,546              | 1  | ,000                                        |                     |                    |

|                              |        |   |      |      |      |
|------------------------------|--------|---|------|------|------|
| Teste Exato de Fisher        |        |   |      | ,000 | ,000 |
| Associação Linear por Linear | 22,178 | 1 | ,000 |      |      |
| N de Casos Válidos           | 1313   |   |      |      |      |

a. 0 células (,0%) esperavam uma contagem menor que 5. A contagem mínima esperada é 96,73.

b. Computado apenas para uma tabela 2x2

### Medidas Simétricas

|                     |             | Valor | Significância Aproximada |
|---------------------|-------------|-------|--------------------------|
| Nominal por Nominal | Fi          | -,130 | ,000                     |
|                     | V de Cramer | ,130  | ,000                     |
| N de Casos Válidos  |             | 1313  |                          |

### Estimativa de Risco

|                                                                                                                                                                                                            | Valor | Intervalo de confiança de 95% |          |
|------------------------------------------------------------------------------------------------------------------------------------------------------------------------------------------------------------|-------|-------------------------------|----------|
|                                                                                                                                                                                                            |       | Inferior                      | Superior |
| Razão de Chances para<br>Perceived adequacy of the<br>availability of personal protective<br>equipment, when providing care<br>for patients in the residency<br>program (Poor adequacy / Good<br>adequacy) | ,527  | ,403                          | ,689     |
| Para grupo DASS21 Classification<br>- Anxiety (dichotomous) = Normal                                                                                                                                       | ,781  | ,696                          | ,877     |
| Para grupo DASS21 Classification<br>- Anxiety (dichotomous) =<br>Abnormal (elevated)                                                                                                                       | 1,483 | 1,270                         | 1,732    |
| N de Casos Válidos                                                                                                                                                                                         | 1313  |                               |          |

Perceived adequacy of the availability of personal protective equipment, when providing care for patients in the residency program \* DASS21 Classification - Stress (dichotomous)

### Crosstab

|                           |               |          | DASS21 Classification - Stress (dichotomous) |                     | Total |
|---------------------------|---------------|----------|----------------------------------------------|---------------------|-------|
|                           |               |          | Normal                                       | Abnormal (elevated) |       |
| Perceived adequacy of the | Poor adequacy | Contagem | 184                                          | 97                  | 281   |

|                                                                                                          |               |                                                                                                                                         |       |       |        |
|----------------------------------------------------------------------------------------------------------|---------------|-----------------------------------------------------------------------------------------------------------------------------------------|-------|-------|--------|
| availability of personal protective equipment, when providing care for patients in the residency program |               | % em Perceived adequacy of the availability of personal protective equipment, when providing care for patients in the residency program | 65,5% | 34,5% | 100,0% |
|                                                                                                          |               | % do Total                                                                                                                              | 14,0% | 7,4%  | 21,4%  |
|                                                                                                          | Good adequacy | Contagem                                                                                                                                | 828   | 204   | 1032   |
|                                                                                                          |               | % em Perceived adequacy of the availability of personal protective equipment, when providing care for patients in the residency program | 80,2% | 19,8% | 100,0% |
|                                                                                                          |               | % do Total                                                                                                                              | 63,1% | 15,5% | 78,6%  |
| Total                                                                                                    |               | Contagem                                                                                                                                | 1012  | 301   | 1313   |
|                                                                                                          |               | % em Perceived adequacy of the availability of personal protective equipment, when providing care for patients in the residency program | 77,1% | 22,9% | 100,0% |
|                                                                                                          |               | % do Total                                                                                                                              | 77,1% | 22,9% | 100,0% |

### Testes qui-quadrado

|                                       | Valor               | gl | Significância Assintótica (Bilateral) | Sig exata (2 lados) | Sig exata (1 lado) |
|---------------------------------------|---------------------|----|---------------------------------------|---------------------|--------------------|
| Qui-quadrado de Pearson               | 27,203 <sup>a</sup> | 1  | ,000                                  |                     |                    |
| Correção de continuidade <sup>b</sup> | 26,374              | 1  | ,000                                  |                     |                    |
| Razão de verossimilhança              | 25,437              | 1  | ,000                                  |                     |                    |
| Teste Exato de Fisher                 |                     |    |                                       | ,000                | ,000               |
| Associação Linear por Linear          | 27,182              | 1  | ,000                                  |                     |                    |
| N de Casos Válidos                    | 1313                |    |                                       |                     |                    |

a. 0 células (,0%) esperavam uma contagem menor que 5. A contagem mínima esperada é 64,42.

b. Computado apenas para uma tabela 2x2

### Medidas Simétricas

|                     |             | Valor | Significância Aproximada |
|---------------------|-------------|-------|--------------------------|
| Nominal por Nominal | Fi          | ,144  | ,000                     |
|                     | V de Cramer | ,144  | ,000                     |
| N de Casos Válidos  |             | 1313  |                          |

### Estimativa de Risco

| Valor | Intervalo de confiança de 95% |
|-------|-------------------------------|
|-------|-------------------------------|

|                                                                                                                                                                                                            |       | Inferior | Superior |
|------------------------------------------------------------------------------------------------------------------------------------------------------------------------------------------------------------|-------|----------|----------|
| Razão de Chances para<br>Perceived adequacy of the<br>availability of personal protective<br>equipment, when providing care<br>for patients in the residency<br>program (Poor adequacy / Good<br>adequacy) | ,467  | ,350     | ,624     |
| Para grupo DASS21 Classification<br>- Stress (dichotomous) = Normal                                                                                                                                        | ,816  | ,746     | ,893     |
| Para grupo DASS21 Classification<br>- Stress (dichotomous) =<br>Abnormal (elevated)                                                                                                                        | 1,746 | 1,426    | 2,138    |
| N de Casos Válidos                                                                                                                                                                                         | 1313  |          |          |

Perceived adequacy of the availability of personal protective equipment, when providing care for patients in the residency program \* PHQ9 Depression Classification - Risk estimate for having current major depressive disorder

### Crosstab

|                                                                                                                                                |                                                                                                                                                     |                                                                                                                                                     | PHQ9 Depression Classification - Risk<br>estimate for having current major<br>depressive disorder |        |        |
|------------------------------------------------------------------------------------------------------------------------------------------------|-----------------------------------------------------------------------------------------------------------------------------------------------------|-----------------------------------------------------------------------------------------------------------------------------------------------------|---------------------------------------------------------------------------------------------------|--------|--------|
|                                                                                                                                                |                                                                                                                                                     |                                                                                                                                                     | Low                                                                                               | High   | Total  |
| Perceived adequacy of the<br>availability of personal protective<br>equipment, when providing care<br>for patients in the residency<br>program | Poor adequacy                                                                                                                                       | Contagem                                                                                                                                            | 59                                                                                                | 222    | 281    |
|                                                                                                                                                |                                                                                                                                                     | % em Perceived adequacy of the<br>availability of personal protective<br>equipment, when providing care<br>for patients in the residency<br>program | 21,0%                                                                                             | 79,0%  | 100,0% |
|                                                                                                                                                |                                                                                                                                                     | % do Total                                                                                                                                          | 4,5%                                                                                              | 16,9%  | 21,4%  |
|                                                                                                                                                | Good adequacy                                                                                                                                       | Contagem                                                                                                                                            | 370                                                                                               | 662    | 1032   |
|                                                                                                                                                |                                                                                                                                                     | % em Perceived adequacy of the<br>availability of personal protective<br>equipment, when providing care<br>for patients in the residency<br>program | 35,9%                                                                                             | 64,1%  | 100,0% |
|                                                                                                                                                |                                                                                                                                                     | % do Total                                                                                                                                          | 28,2%                                                                                             | 50,4%  | 78,6%  |
| Total                                                                                                                                          | Contagem                                                                                                                                            | 429                                                                                                                                                 | 884                                                                                               | 1313   |        |
|                                                                                                                                                | % em Perceived adequacy of the<br>availability of personal protective<br>equipment, when providing care<br>for patients in the residency<br>program | 32,7%                                                                                                                                               | 67,3%                                                                                             | 100,0% |        |

|            |       |       |        |
|------------|-------|-------|--------|
| % do Total | 32,7% | 67,3% | 100,0% |
|------------|-------|-------|--------|

### Testes qui-quadrado

|                                       | Valor               | gl | Significância<br>Assintótica<br>(Bilateral) | Sig exata (2 lados) | Sig exata (1 lado) |
|---------------------------------------|---------------------|----|---------------------------------------------|---------------------|--------------------|
| Qui-quadrado de Pearson               | 22,160 <sup>a</sup> | 1  | ,000                                        |                     |                    |
| Correção de continuidade <sup>b</sup> | 21,489              | 1  | ,000                                        |                     |                    |
| Razão de verossimilhança              | 23,500              | 1  | ,000                                        |                     |                    |
| Teste Exato de Fisher                 |                     |    |                                             | ,000                | ,000               |
| Associação Linear por Linear          | 22,143              | 1  | ,000                                        |                     |                    |
| N de Casos Válidos                    | 1313                |    |                                             |                     |                    |

a. 0 células (,0%) esperavam uma contagem menor que 5. A contagem mínima esperada é 91,81.

b. Computado apenas para uma tabela 2x2

### Medidas Simétricas

|                     |             | Valor | Significância<br>Aproximada |
|---------------------|-------------|-------|-----------------------------|
| Nominal por Nominal | Fi          | -,130 | ,000                        |
|                     | V de Cramer | ,130  | ,000                        |
| N de Casos Válidos  |             | 1313  |                             |

### Estimativa de Risco

|                                                                                                                                                                                                            | Valor | Intervalo de confiança de 95% |          |
|------------------------------------------------------------------------------------------------------------------------------------------------------------------------------------------------------------|-------|-------------------------------|----------|
|                                                                                                                                                                                                            |       | Inferior                      | Superior |
| Razão de Chances para<br>Perceived adequacy of the<br>availability of personal protective<br>equipment, when providing care<br>for patients in the residency<br>program (Poor adequacy / Good<br>adequacy) | ,476  | ,347                          | ,651     |
| Para grupo PHQ9 Depression<br>Classification - Risk estimate for<br>having current major depressive<br>disorder = Low                                                                                      | ,586  | ,460                          | ,745     |
| Para grupo PHQ9 Depression<br>Classification - Risk estimate for<br>having current major depressive<br>disorder = High                                                                                     | 1,232 | 1,142                         | 1,328    |
| N de Casos Válidos                                                                                                                                                                                         | 1313  |                               |          |

Perceived adequacy of the availability of personal protective equipment, when providing care for patients in the residency program \* BRCS Classification

### Crosstab

|                                                                                                                                    |               |                                                                                                                                         | BRCS Classification |                  | Total  |
|------------------------------------------------------------------------------------------------------------------------------------|---------------|-----------------------------------------------------------------------------------------------------------------------------------------|---------------------|------------------|--------|
|                                                                                                                                    |               |                                                                                                                                         | Low resilience      | Moderate to High |        |
| Perceived adequacy of the availability of personal protective equipment, when providing care for patients in the residency program | Poor adequacy | Contagem                                                                                                                                | 193                 | 88               | 281    |
|                                                                                                                                    |               | % em Perceived adequacy of the availability of personal protective equipment, when providing care for patients in the residency program | 68,7%               | 31,3%            | 100,0% |
|                                                                                                                                    |               | % do Total                                                                                                                              | 14,7%               | 6,7%             | 21,4%  |
|                                                                                                                                    | Good adequacy | Contagem                                                                                                                                | 620                 | 412              | 1032   |
|                                                                                                                                    |               | % em Perceived adequacy of the availability of personal protective equipment, when providing care for patients in the residency program | 60,1%               | 39,9%            | 100,0% |
|                                                                                                                                    |               | % do Total                                                                                                                              | 47,2%               | 31,4%            | 78,6%  |
|                                                                                                                                    | Total         | Contagem                                                                                                                                | 813                 | 500              | 1313   |
|                                                                                                                                    |               | % em Perceived adequacy of the availability of personal protective equipment, when providing care for patients in the residency program | 61,9%               | 38,1%            | 100,0% |
|                                                                                                                                    |               | % do Total                                                                                                                              | 61,9%               | 38,1%            | 100,0% |

### Testes qui-quadrado

|                                       | Valor              | gl | Significância Assintótica (Bilateral) | Sig exata (2 lados) | Sig exata (1 lado) |
|---------------------------------------|--------------------|----|---------------------------------------|---------------------|--------------------|
| Qui-quadrado de Pearson               | 6,937 <sup>a</sup> | 1  | ,008                                  |                     |                    |
| Correção de continuidade <sup>b</sup> | 6,577              | 1  | ,010                                  |                     |                    |
| Razão de verossimilhança              | 7,076              | 1  | ,008                                  |                     |                    |
| Teste Exato de Fisher                 |                    |    |                                       | ,008                | ,005               |
| Associação Linear por Linear          | 6,932              | 1  | ,008                                  |                     |                    |
| N de Casos Válidos                    | 1313               |    |                                       |                     |                    |

a. 0 células (,0%) esperavam uma contagem menor que 5. A contagem mínima esperada é 107,01.

b. Computado apenas para uma tabela 2x2

## Medidas Simétricas

|                     |             | Valor | Significância Aproximada |
|---------------------|-------------|-------|--------------------------|
| Nominal por Nominal | Fi          | ,073  | ,008                     |
|                     | V de Cramer | ,073  | ,008                     |
| N de Casos Válidos  |             | 1313  |                          |

## Estimativa de Risco

|                                                                                                                                                                                                            | Valor | Intervalo de confiança de 95% |          |
|------------------------------------------------------------------------------------------------------------------------------------------------------------------------------------------------------------|-------|-------------------------------|----------|
|                                                                                                                                                                                                            |       | Inferior                      | Superior |
| Razão de Chances para<br>Perceived adequacy of the<br>availability of personal protective<br>equipment, when providing care<br>for patients in the residency<br>program (Poor adequacy / Good<br>adequacy) | 1,457 | 1,100                         | 1,931    |
| Para grupo BRCS Classification =<br>Low resilience                                                                                                                                                         | 1,143 | 1,041                         | 1,255    |
| Para grupo BRCS Classification =<br>Moderate to High                                                                                                                                                       | ,784  | ,650                          | ,947     |
| N de Casos Válidos                                                                                                                                                                                         | 1313  |                               |          |

Perceived adequacy of the availability of personal protective equipment, when providing care for patients in the residency program \* OLBI Score Classification

## Crosstab

|                                                                                                                                                |               |                                                                                                                                                     | OLBI Score Classification |       | Total  |
|------------------------------------------------------------------------------------------------------------------------------------------------|---------------|-----------------------------------------------------------------------------------------------------------------------------------------------------|---------------------------|-------|--------|
|                                                                                                                                                |               |                                                                                                                                                     | Low to Moderate           | High  |        |
| Perceived adequacy of the<br>availability of personal protective<br>equipment, when providing care<br>for patients in the residency<br>program | Poor adequacy | Contagem                                                                                                                                            | 141                       | 140   | 281    |
|                                                                                                                                                |               | % em Perceived adequacy of the<br>availability of personal protective<br>equipment, when providing care<br>for patients in the residency<br>program | 50,2%                     | 49,8% | 100,0% |
|                                                                                                                                                |               | % do Total                                                                                                                                          | 10,7%                     | 10,7% | 21,4%  |
|                                                                                                                                                | Good adequacy | Contagem                                                                                                                                            | 734                       | 298   | 1032   |
|                                                                                                                                                |               | % em Perceived adequacy of the<br>availability of personal protective<br>equipment, when providing care<br>for patients in the residency<br>program | 71,1%                     | 28,9% | 100,0% |
|                                                                                                                                                |               | % do Total                                                                                                                                          | 55,9%                     | 22,7% | 78,6%  |

|       |                                                                                                                                         |       |       |        |
|-------|-----------------------------------------------------------------------------------------------------------------------------------------|-------|-------|--------|
| Total | Contagem                                                                                                                                | 875   | 438   | 1313   |
|       | % em Perceived adequacy of the availability of personal protective equipment, when providing care for patients in the residency program | 66,6% | 33,4% | 100,0% |
|       | % do Total                                                                                                                              | 66,6% | 33,4% | 100,0% |

### Testes qui-quadrado

|                                       | Valor               | gl | Significância Assintótica (Bilateral) | Sig exata (2 lados) | Sig exata (1 lado) |
|---------------------------------------|---------------------|----|---------------------------------------|---------------------|--------------------|
| Qui-quadrado de Pearson               | 43,589 <sup>a</sup> | 1  | ,000                                  |                     |                    |
| Correção de continuidade <sup>b</sup> | 42,652              | 1  | ,000                                  |                     |                    |
| Razão de verossimilhança              | 41,862              | 1  | ,000                                  |                     |                    |
| Teste Exato de Fisher                 |                     |    |                                       | ,000                | ,000               |
| Associação Linear por Linear          | 43,556              | 1  | ,000                                  |                     |                    |
| N de Casos Válidos                    | 1313                |    |                                       |                     |                    |

a. 0 células (,0%) esperavam uma contagem menor que 5. A contagem mínima esperada é 93,74.

b. Computado apenas para uma tabela 2x2

### Medidas Simétricas

|                     |             | Valor | Significância Aproximada |
|---------------------|-------------|-------|--------------------------|
| Nominal por Nominal | Fi          | -,182 | ,000                     |
|                     | V de Cramer | ,182  | ,000                     |
| N de Casos Válidos  |             | 1313  |                          |

### Estimativa de Risco

|                                                                                                                                                                                          | Valor | Intervalo de confiança de 95% |          |
|------------------------------------------------------------------------------------------------------------------------------------------------------------------------------------------|-------|-------------------------------|----------|
|                                                                                                                                                                                          |       | Inferior                      | Superior |
| Razão de Chances para Perceived adequacy of the availability of personal protective equipment, when providing care for patients in the residency program (Poor adequacy / Good adequacy) | ,409  | ,312                          | ,536     |
| Para grupo OLBI Score Classification = Low to Moderate                                                                                                                                   | ,705  | ,624                          | ,798     |
| Para grupo OLBI Score Classification = High                                                                                                                                              | 1,725 | 1,483                         | 2,008    |
| N de Casos Válidos                                                                                                                                                                       | 1313  |                               |          |

Cumulative weekly workload < or >= 60h (dichotomous) \* DASS21 Classification - Depression (dichotomous)

### Crosstab

|                                                      |       |                                                           | DASS21 Classification - Depression<br>(dichotomous) |                        | Total  |
|------------------------------------------------------|-------|-----------------------------------------------------------|-----------------------------------------------------|------------------------|--------|
|                                                      |       |                                                           | Normal                                              | Abnormal<br>(elevated) |        |
| Cumulative weekly workload < or >= 60h (dichotomous) | <=60h | Contagem                                                  | 373                                                 | 168                    | 541    |
|                                                      |       | % em Cumulative weekly workload < or >= 60h (dichotomous) | 68,9%                                               | 31,1%                  | 100,0% |
|                                                      |       | % do Total                                                | 28,4%                                               | 12,8%                  | 41,2%  |
|                                                      | >60h  | Contagem                                                  | 497                                                 | 275                    | 772    |
|                                                      |       | % em Cumulative weekly workload < or >= 60h (dichotomous) | 64,4%                                               | 35,6%                  | 100,0% |
|                                                      |       | % do Total                                                | 37,9%                                               | 20,9%                  | 58,8%  |
|                                                      | Total | Contagem                                                  | 870                                                 | 443                    | 1313   |
|                                                      |       | % em Cumulative weekly workload < or >= 60h (dichotomous) | 66,3%                                               | 33,7%                  | 100,0% |
|                                                      |       | % do Total                                                | 66,3%                                               | 33,7%                  | 100,0% |

### Testes qui-quadrado

|                                       | Valor              | gl | Significância<br>Assintótica<br>(Bilateral) | Sig exata (2 lados) | Sig exata (1 lado) |
|---------------------------------------|--------------------|----|---------------------------------------------|---------------------|--------------------|
| Qui-quadrado de Pearson               | 2,969 <sup>a</sup> | 1  | ,085                                        |                     |                    |
| Correção de continuidade <sup>b</sup> | 2,768              | 1  | ,096                                        |                     |                    |
| Razão de verossimilhança              | 2,983              | 1  | ,084                                        |                     |                    |
| Teste Exato de Fisher                 |                    |    |                                             | ,086                | ,048               |
| Associação Linear por Linear          | 2,967              | 1  | ,085                                        |                     |                    |
| N de Casos Válidos                    | 1313               |    |                                             |                     |                    |

a. 0 células (,0%) esperavam uma contagem menor que 5. A contagem mínima esperada é 182,53.

b. Computado apenas para uma tabela 2x2

### Medidas Simétricas

| Valor | Significância<br>Aproximada |
|-------|-----------------------------|
|-------|-----------------------------|

|                     |             |      |      |
|---------------------|-------------|------|------|
| Nominal por Nominal | Fi          | ,048 | ,085 |
|                     | V de Cramer | ,048 | ,085 |
| N de Casos Válidos  |             | 1313 |      |

### Estimativa de Risco

|                                                                                                    | Valor | Intervalo de confiança de 95% |          |
|----------------------------------------------------------------------------------------------------|-------|-------------------------------|----------|
|                                                                                                    |       | Inferior                      | Superior |
| Razão de Chances para<br>Cumulative weekly workload < or<br>>= 60h (dichotomous) (<=60h /<br>>60h) | 1,229 | ,972                          | 1,553    |
| Para grupo DASS21 Classification<br>- Depression (dichotomous) =<br>Normal                         | 1,071 | ,991                          | 1,157    |
| Para grupo DASS21 Classification<br>- Depression (dichotomous) =<br>Abnormal (elevated)            | ,872  | ,745                          | 1,020    |
| N de Casos Válidos                                                                                 | 1313  |                               |          |

Cumulative weekly workload < or >= 60h (dichotomous) \* DASS21 Classification - Anxiety (dichotomous)

### Crosstab

|                                                         |                                                                 |                                                                 | DASS21 Classification - Anxiety<br>(dichotomous) |                        | Total  |
|---------------------------------------------------------|-----------------------------------------------------------------|-----------------------------------------------------------------|--------------------------------------------------|------------------------|--------|
|                                                         |                                                                 |                                                                 | Normal                                           | Abnormal<br>(elevated) |        |
| Cumulative weekly workload <<br>or >= 60h (dichotomous) | <=60h                                                           | Contagem                                                        | 355                                              | 186                    | 541    |
|                                                         |                                                                 | % em Cumulative weekly<br>workload < or >= 60h<br>(dichotomous) | 65,6%                                            | 34,4%                  | 100,0% |
|                                                         |                                                                 | % do Total                                                      | 27,0%                                            | 14,2%                  | 41,2%  |
|                                                         | >60h                                                            | Contagem                                                        | 506                                              | 266                    | 772    |
|                                                         |                                                                 | % em Cumulative weekly<br>workload < or >= 60h<br>(dichotomous) | 65,5%                                            | 34,5%                  | 100,0% |
|                                                         |                                                                 | % do Total                                                      | 38,5%                                            | 20,3%                  | 58,8%  |
| Total                                                   | Contagem                                                        |                                                                 | 861                                              | 452                    | 1313   |
|                                                         | % em Cumulative weekly<br>workload < or >= 60h<br>(dichotomous) |                                                                 | 65,6%                                            | 34,4%                  | 100,0% |
|                                                         | % do Total                                                      |                                                                 | 65,6%                                            | 34,4%                  | 100,0% |

### Testes qui-quadrado

|                                       | Valor             | gl | Significância<br>Assintótica<br>(Bilateral) | Sig exata (2 lados) | Sig exata (1 lado) |
|---------------------------------------|-------------------|----|---------------------------------------------|---------------------|--------------------|
| Qui-quadrado de Pearson               | ,001 <sup>a</sup> | 1  | ,977                                        |                     |                    |
| Correção de continuidade <sup>b</sup> | ,000              | 1  | 1,000                                       |                     |                    |
| Razão de verossimilhança              | ,001              | 1  | ,977                                        |                     |                    |
| Teste Exato de Fisher                 |                   |    |                                             | 1,000               | ,513               |
| Associação Linear por Linear          | ,001              | 1  | ,977                                        |                     |                    |
| N de Casos Válidos                    | 1313              |    |                                             |                     |                    |

a. 0 células (,0%) esperavam uma contagem menor que 5. A contagem mínima esperada é 186,24.

b. Computado apenas para uma tabela 2x2

### Medidas Simétricas

|                     |             | Valor | Significância<br>Aproximada |
|---------------------|-------------|-------|-----------------------------|
| Nominal por Nominal | Fi          | ,001  | ,977                        |
|                     | V de Cramer | ,001  | ,977                        |
| N de Casos Válidos  |             | 1313  |                             |

### Estimativa de Risco

|                                                                                                    | Valor | Intervalo de confiança de 95% |          |
|----------------------------------------------------------------------------------------------------|-------|-------------------------------|----------|
|                                                                                                    |       | Inferior                      | Superior |
| Razão de Chances para<br>Cumulative weekly workload < or<br>>= 60h (dichotomous) (<=60h /<br>>60h) | 1,003 | ,796                          | 1,264    |
| Para grupo DASS21 Classification<br>- Anxiety (dichotomous) = Normal                               | 1,001 | ,925                          | 1,084    |
| Para grupo DASS21 Classification<br>- Anxiety (dichotomous) =<br>Abnormal (elevated)               | ,998  | ,857                          | 1,161    |
| N de Casos Válidos                                                                                 | 1313  |                               |          |

Cumulative weekly workload < or >= 60h (dichotomous) \* DASS21 Classification - Stress (dichotomous)

### Crosstab

DASS21 Classification - Stress  
(dichotomous)

Total

|                                                      |       |                                                           | Normal | Abnormal<br>(elevated) |        |
|------------------------------------------------------|-------|-----------------------------------------------------------|--------|------------------------|--------|
| Cumulative weekly workload < or >= 60h (dichotomous) | <=60h | Contagem                                                  | 417    | 124                    | 541    |
|                                                      |       | % em Cumulative weekly workload < or >= 60h (dichotomous) | 77,1%  | 22,9%                  | 100,0% |
|                                                      |       | % do Total                                                | 31,8%  | 9,4%                   | 41,2%  |
|                                                      | >60h  | Contagem                                                  | 595    | 177                    | 772    |
|                                                      |       | % em Cumulative weekly workload < or >= 60h (dichotomous) | 77,1%  | 22,9%                  | 100,0% |
|                                                      |       | % do Total                                                | 45,3%  | 13,5%                  | 58,8%  |
|                                                      | Total | Contagem                                                  | 1012   | 301                    | 1313   |
|                                                      |       | % em Cumulative weekly workload < or >= 60h (dichotomous) | 77,1%  | 22,9%                  | 100,0% |
|                                                      |       | % do Total                                                | 77,1%  | 22,9%                  | 100,0% |

### Testes qui-quadrado

|                                       | Valor             | gl | Significância<br>Assintótica<br>(Bilateral) | Sig exata (2 lados) | Sig exata (1 lado) |
|---------------------------------------|-------------------|----|---------------------------------------------|---------------------|--------------------|
| Qui-quadrado de Pearson               | ,000 <sup>a</sup> | 1  | ,998                                        |                     |                    |
| Correção de continuidade <sup>b</sup> | ,000              | 1  | 1,000                                       |                     |                    |
| Razão de verossimilhança              | ,000              | 1  | ,998                                        |                     |                    |
| Teste Exato de Fisher                 |                   |    |                                             | 1,000               | ,526               |
| Associação Linear por Linear          | ,000              | 1  | ,998                                        |                     |                    |
| N de Casos Válidos                    | 1313              |    |                                             |                     |                    |

a. 0 células (,0%) esperavam uma contagem menor que 5. A contagem mínima esperada é 124,02.

b. Computado apenas para uma tabela 2x2

### Medidas Simétricas

|                     |             | Valor | Significância<br>Aproximada |
|---------------------|-------------|-------|-----------------------------|
| Nominal por Nominal | Fi          | ,000  | ,998                        |
|                     | V de Cramer | ,000  | ,998                        |
| N de Casos Válidos  |             | 1313  |                             |

### Estimativa de Risco

| Valor | Intervalo de confiança de 95% |          |
|-------|-------------------------------|----------|
|       | Inferior                      | Superior |

|                                                                                                    |       |      |       |
|----------------------------------------------------------------------------------------------------|-------|------|-------|
| Razão de Chances para<br>Cumulative weekly workload < or<br>>= 60h (dichotomous) (<=60h /<br>>60h) | 1,000 | ,770 | 1,299 |
| Para grupo DASS21 Classification<br>- Stress (dichotomous) = Normal                                | 1,000 | ,942 | 1,062 |
| Para grupo DASS21 Classification<br>- Stress (dichotomous) =<br>Abnormal (elevated)                | 1,000 | ,817 | 1,223 |
| N de Casos Válidos                                                                                 | 1313  |      |       |

Cumulative weekly workload < or >= 60h (dichotomous) \* PHQ9 Depression Classification - Risk estimate for having current major depressive disorder

### Crosstab

|                                                         |                                                                 |                                                                 | PHQ9 Depression Classification - Risk<br>estimate for having current major<br>depressive disorder |       | Total  |
|---------------------------------------------------------|-----------------------------------------------------------------|-----------------------------------------------------------------|---------------------------------------------------------------------------------------------------|-------|--------|
|                                                         |                                                                 |                                                                 | Low                                                                                               | High  |        |
| Cumulative weekly workload <<br>or >= 60h (dichotomous) | <=60h                                                           | Contagem                                                        | 198                                                                                               | 343   | 541    |
|                                                         |                                                                 | % em Cumulative weekly<br>workload < or >= 60h<br>(dichotomous) | 36,6%                                                                                             | 63,4% | 100,0% |
|                                                         |                                                                 | % do Total                                                      | 15,1%                                                                                             | 26,1% | 41,2%  |
|                                                         | >60h                                                            | Contagem                                                        | 231                                                                                               | 541   | 772    |
|                                                         |                                                                 | % em Cumulative weekly<br>workload < or >= 60h<br>(dichotomous) | 29,9%                                                                                             | 70,1% | 100,0% |
|                                                         |                                                                 | % do Total                                                      | 17,6%                                                                                             | 41,2% | 58,8%  |
| Total                                                   | Contagem                                                        |                                                                 | 429                                                                                               | 884   | 1313   |
|                                                         | % em Cumulative weekly<br>workload < or >= 60h<br>(dichotomous) |                                                                 | 32,7%                                                                                             | 67,3% | 100,0% |
|                                                         | % do Total                                                      |                                                                 | 32,7%                                                                                             | 67,3% | 100,0% |

### Testes qui-quadrado

|                                       | Valor              | gl | Significância<br>Assintótica<br>(Bilateral) | Sig exata (2 lados) | Sig exata (1 lado) |
|---------------------------------------|--------------------|----|---------------------------------------------|---------------------|--------------------|
| Qui-quadrado de Pearson               | 6,446 <sup>a</sup> | 1  | ,011                                        |                     |                    |
| Correção de continuidade <sup>b</sup> | 6,146              | 1  | ,013                                        |                     |                    |
| Razão de verossimilhança              | 6,415              | 1  | ,011                                        |                     |                    |

|                              |       |   |      |      |      |
|------------------------------|-------|---|------|------|------|
| Teste Exato de Fisher        |       |   |      | ,012 | ,007 |
| Associação Linear por Linear | 6,441 | 1 | ,011 |      |      |
| N de Casos Válidos           | 1313  |   |      |      |      |

a. 0 células (,0%) esperavam uma contagem menor que 5. A contagem mínima esperada é 176,76.

b. Computado apenas para uma tabela 2x2

### Medidas Simétricas

|                     |             | Valor | Significância Aproximada |
|---------------------|-------------|-------|--------------------------|
| Nominal por Nominal | Fi          | ,070  | ,011                     |
|                     | V de Cramer | ,070  | ,011                     |
| N de Casos Válidos  |             | 1313  |                          |

### Estimativa de Risco

|                                                                                                               | Valor | Intervalo de confiança de 95% |          |
|---------------------------------------------------------------------------------------------------------------|-------|-------------------------------|----------|
|                                                                                                               |       | Inferior                      | Superior |
| Razão de Chances para Cumulative weekly workload < or >= 60h (dichotomous) (<=60h / >60h)                     | 1,352 | 1,071                         | 1,707    |
| Para grupo PHQ9 Depression Classification - Risk estimate for having current major depressive disorder = Low  | 1,223 | 1,048                         | 1,428    |
| Para grupo PHQ9 Depression Classification - Risk estimate for having current major depressive disorder = High | ,905  | ,836                          | ,979     |
| N de Casos Válidos                                                                                            | 1313  |                               |          |

Cumulative weekly workload < or >= 60h (dichotomous) \* BRCS Classification

### Crosstab

|                                                      |       |                                                           | BRCS Classification |                  | Total  |
|------------------------------------------------------|-------|-----------------------------------------------------------|---------------------|------------------|--------|
|                                                      |       |                                                           | Low resilience      | Moderate to High |        |
| Cumulative weekly workload < or >= 60h (dichotomous) | <=60h | Contagem                                                  | 346                 | 195              | 541    |
|                                                      |       | % em Cumulative weekly workload < or >= 60h (dichotomous) | 64,0%               | 36,0%            | 100,0% |
|                                                      |       | % do Total                                                | 26,4%               | 14,9%            | 41,2%  |
|                                                      | >60h  | Contagem                                                  | 467                 | 305              | 772    |

|       |                                                           |       |       |        |
|-------|-----------------------------------------------------------|-------|-------|--------|
| Total | % em Cumulative weekly workload < or >= 60h (dichotomous) | 60,5% | 39,5% | 100,0% |
|       | % do Total                                                | 35,6% | 23,2% | 58,8%  |
|       | Contagem                                                  | 813   | 500   | 1313   |
|       | % em Cumulative weekly workload < or >= 60h (dichotomous) | 61,9% | 38,1% | 100,0% |
|       | % do Total                                                | 61,9% | 38,1% | 100,0% |

### Testes qui-quadrado

|                                       | Valor              | gl | Significância Assintótica (Bilateral) | Sig exata (2 lados) | Sig exata (1 lado) |
|---------------------------------------|--------------------|----|---------------------------------------|---------------------|--------------------|
| Qui-quadrado de Pearson               | 1,618 <sup>a</sup> | 1  | ,203                                  |                     |                    |
| Correção de continuidade <sup>b</sup> | 1,475              | 1  | ,225                                  |                     |                    |
| Razão de verossimilhança              | 1,622              | 1  | ,203                                  |                     |                    |
| Teste Exato de Fisher                 |                    |    |                                       | ,205                | ,112               |
| Associação Linear por Linear          | 1,617              | 1  | ,204                                  |                     |                    |
| N de Casos Válidos                    | 1313               |    |                                       |                     |                    |

a. 0 células (,0%) esperavam uma contagem menor que 5. A contagem mínima esperada é 206,02.

b. Computado apenas para uma tabela 2x2

### Medidas Simétricas

|                     |             | Valor | Significância Aproximada |
|---------------------|-------------|-------|--------------------------|
| Nominal por Nominal | Fi          | ,035  | ,203                     |
|                     | V de Cramer | ,035  | ,203                     |
| N de Casos Válidos  |             | 1313  |                          |

### Estimativa de Risco

|                                                                                           | Valor | Intervalo de confiança de 95% |          |
|-------------------------------------------------------------------------------------------|-------|-------------------------------|----------|
|                                                                                           |       | Inferior                      | Superior |
| Razão de Chances para Cumulative weekly workload < or >= 60h (dichotomous) (<=60h / >60h) | 1,159 | ,923                          | 1,454    |
| Para grupo BRCS Classification = Low resilience                                           | 1,057 | ,971                          | 1,151    |
| Para grupo BRCS Classification = Moderate to High                                         | ,912  | ,791                          | 1,052    |
| N de Casos Válidos                                                                        | 1313  |                               |          |

Cumulative weekly workload < or >= 60h (dichotomous) \* OLBI Score Classification

### Crosstab

|                                                      |       | OLBI Score Classification                                 |       | Total |
|------------------------------------------------------|-------|-----------------------------------------------------------|-------|-------|
|                                                      |       | Low to Moderate                                           | High  |       |
| Cumulative weekly workload < or >= 60h (dichotomous) | <=60h | Contagem                                                  | 380   | 161   |
|                                                      |       | % em Cumulative weekly workload < or >= 60h (dichotomous) | 70,2% | 29,8% |
|                                                      |       | % do Total                                                | 28,9% | 12,3% |
|                                                      | >60h  | Contagem                                                  | 495   | 277   |
|                                                      |       | % em Cumulative weekly workload < or >= 60h (dichotomous) | 64,1% | 35,9% |
|                                                      |       | % do Total                                                | 37,7% | 21,1% |
|                                                      | Total | Contagem                                                  | 875   | 438   |
|                                                      |       | % em Cumulative weekly workload < or >= 60h (dichotomous) | 66,6% | 33,4% |
|                                                      |       | % do Total                                                | 66,6% | 33,4% |

### Testes qui-quadrado

|                                       | Valor              | gl | Significância Assintótica (Bilateral) | Sig exata (2 lados) | Sig exata (1 lado) |
|---------------------------------------|--------------------|----|---------------------------------------|---------------------|--------------------|
| Qui-quadrado de Pearson               | 5,361 <sup>a</sup> | 1  | ,021                                  |                     |                    |
| Correção de continuidade <sup>b</sup> | 5,089              | 1  | ,024                                  |                     |                    |
| Razão de verossimilhança              | 5,396              | 1  | ,020                                  |                     |                    |
| Teste Exato de Fisher                 |                    |    |                                       | ,024                | ,012               |
| Associação Linear por Linear          | 5,357              | 1  | ,021                                  |                     |                    |
| N de Casos Válidos                    | 1313               |    |                                       |                     |                    |

a. 0 células (,0%) esperavam uma contagem menor que 5. A contagem mínima esperada é 180,47.

b. Computado apenas para uma tabela 2x2

### Medidas Simétricas

|                     |             | Valor | Significância Aproximada |
|---------------------|-------------|-------|--------------------------|
| Nominal por Nominal | Fi          | ,064  | ,021                     |
|                     | V de Cramer | ,064  | ,021                     |

|                    |      |
|--------------------|------|
| N de Casos Válidos | 1313 |
|--------------------|------|

### Estimativa de Risco

|                                                                                           | Valor | Intervalo de confiança de 95% |          |
|-------------------------------------------------------------------------------------------|-------|-------------------------------|----------|
|                                                                                           |       | Inferior                      | Superior |
| Razão de Chances para Cumulative weekly workload < or >= 60h (dichotomous) (<=60h / >60h) | 1,321 | 1,043                         | 1,672    |
| Para grupo OLBI Score Classification = Low to Moderate                                    | 1,095 | 1,015                         | 1,182    |
| Para grupo OLBI Score Classification = High                                               | ,829  | ,707                          | ,973     |
| N de Casos Válidos                                                                        | 1313  |                               |          |

Cumulative weekly workload < or >= 90h (dichotomous) \* DASS21 Classification - Depression (dichotomous)

### Crosstab

|                                                      |                                                           |                                                           | DASS21 Classification - Depression (dichotomous) |                     | Total  |
|------------------------------------------------------|-----------------------------------------------------------|-----------------------------------------------------------|--------------------------------------------------|---------------------|--------|
|                                                      |                                                           |                                                           | Normal                                           | Abnormal (elevated) |        |
| Cumulative weekly workload < or >= 90h (dichotomous) | <=90H                                                     | Contagem                                                  | 824                                              | 399                 | 1223   |
|                                                      |                                                           | % em Cumulative weekly workload < or >= 90h (dichotomous) | 67,4%                                            | 32,6%               | 100,0% |
|                                                      |                                                           | % do Total                                                | 62,8%                                            | 30,4%               | 93,1%  |
|                                                      | >90H                                                      | Contagem                                                  | 46                                               | 44                  | 90     |
|                                                      |                                                           | % em Cumulative weekly workload < or >= 90h (dichotomous) | 51,1%                                            | 48,9%               | 100,0% |
|                                                      |                                                           | % do Total                                                | 3,5%                                             | 3,4%                | 6,9%   |
| Total                                                | Contagem                                                  |                                                           | 870                                              | 443                 | 1313   |
|                                                      | % em Cumulative weekly workload < or >= 90h (dichotomous) |                                                           | 66,3%                                            | 33,7%               | 100,0% |
|                                                      | % do Total                                                |                                                           | 66,3%                                            | 33,7%               | 100,0% |

### Testes qui-quadrado

|                                       | Valor              | gl | Significância<br>Assintótica<br>(Bilateral) | Sig exata (2 lados) | Sig exata (1 lado) |
|---------------------------------------|--------------------|----|---------------------------------------------|---------------------|--------------------|
| Qui-quadrado de Pearson               | 9,919 <sup>a</sup> | 1  | ,002                                        |                     |                    |
| Correção de continuidade <sup>b</sup> | 9,205              | 1  | ,002                                        |                     |                    |
| Razão de verossimilhança              | 9,439              | 1  | ,002                                        |                     |                    |
| Teste Exato de Fisher                 |                    |    |                                             | ,002                | ,001               |
| Associação Linear por Linear          | 9,912              | 1  | ,002                                        |                     |                    |
| N de Casos Válidos                    | 1313               |    |                                             |                     |                    |

a. 0 células (,0%) esperavam uma contagem menor que 5. A contagem mínima esperada é 30,37.

b. Computado apenas para uma tabela 2x2

### Medidas Simétricas

|                     |             | Valor | Significância<br>Aproximada |
|---------------------|-------------|-------|-----------------------------|
| Nominal por Nominal | Fi          | ,087  | ,002                        |
|                     | V de Cramer | ,087  | ,002                        |
| N de Casos Válidos  |             | 1313  |                             |

### Estimativa de Risco

|                                                                                                    | Valor | Intervalo de confiança de 95% |          |
|----------------------------------------------------------------------------------------------------|-------|-------------------------------|----------|
|                                                                                                    |       | Inferior                      | Superior |
| Razão de Chances para<br>Cumulative weekly workload < or<br>>= 90h (dichotomous) (<=90H /<br>>90H) | 1,975 | 1,285                         | 3,037    |
| Para grupo DASS21 Classification<br>- Depression (dichotomous) =<br>Normal                         | 1,318 | 1,073                         | 1,619    |
| Para grupo DASS21 Classification<br>- Depression (dichotomous) =<br>Abnormal (elevated)            | ,667  | ,532                          | ,837     |
| N de Casos Válidos                                                                                 | 1313  |                               |          |

Cumulative weekly workload < or >= 90h (dichotomous) \* DASS21 Classification - Anxiety (dichotomous)

### Crosstab

| DASS21 Classification - Anxiety<br>(dichotomous) |                        | Total |
|--------------------------------------------------|------------------------|-------|
| Normal                                           | Abnormal<br>(elevated) |       |

|                                                      |       |                                                           |       |       |        |
|------------------------------------------------------|-------|-----------------------------------------------------------|-------|-------|--------|
| Cumulative weekly workload < or >= 90h (dichotomous) | <=90H | Contagem                                                  | 803   | 420   | 1223   |
|                                                      |       | % em Cumulative weekly workload < or >= 90h (dichotomous) | 65,7% | 34,3% | 100,0% |
|                                                      |       | % do Total                                                | 61,2% | 32,0% | 93,1%  |
|                                                      | >90H  | Contagem                                                  | 58    | 32    | 90     |
|                                                      |       | % em Cumulative weekly workload < or >= 90h (dichotomous) | 64,4% | 35,6% | 100,0% |
|                                                      |       | % do Total                                                | 4,4%  | 2,4%  | 6,9%   |
|                                                      | Total | Contagem                                                  | 861   | 452   | 1313   |
|                                                      |       | % em Cumulative weekly workload < or >= 90h (dichotomous) | 65,6% | 34,4% | 100,0% |
|                                                      |       | % do Total                                                | 65,6% | 34,4% | 100,0% |

### Testes qui-quadrado

|                                       | Valor             | gl | Significância Assintótica (Bilateral) | Sig exata (2 lados) | Sig exata (1 lado) |
|---------------------------------------|-------------------|----|---------------------------------------|---------------------|--------------------|
| Qui-quadrado de Pearson               | ,055 <sup>a</sup> | 1  | ,815                                  |                     |                    |
| Correção de continuidade <sup>b</sup> | ,014              | 1  | ,905                                  |                     |                    |
| Razão de verossimilhança              | ,054              | 1  | ,815                                  |                     |                    |
| Teste Exato de Fisher                 |                   |    |                                       | ,819                | ,449               |
| Associação Linear por Linear          | ,055              | 1  | ,815                                  |                     |                    |
| N de Casos Válidos                    | 1313              |    |                                       |                     |                    |

a. 0 células (,0%) esperavam uma contagem menor que 5. A contagem mínima esperada é 30,98.

b. Computado apenas para uma tabela 2x2

### Medidas Simétricas

|                     |             | Valor | Significância Aproximada |
|---------------------|-------------|-------|--------------------------|
| Nominal por Nominal | Fi          | ,006  | ,815                     |
|                     | V de Cramer | ,006  | ,815                     |
| N de Casos Válidos  |             | 1313  |                          |

### Estimativa de Risco

|                                                                                           | Valor | Intervalo de confiança de 95% |          |
|-------------------------------------------------------------------------------------------|-------|-------------------------------|----------|
|                                                                                           |       | Inferior                      | Superior |
| Razão de Chances para Cumulative weekly workload < or >= 90h (dichotomous) (<=90H / >90H) | 1,055 | ,674                          | 1,650    |

|                                                                                      |       |      |       |
|--------------------------------------------------------------------------------------|-------|------|-------|
| Para grupo DASS21 Classification<br>- Anxiety (dichotomous) = Normal                 | 1,019 | ,869 | 1,194 |
| Para grupo DASS21 Classification<br>- Anxiety (dichotomous) =<br>Abnormal (elevated) | ,966  | ,724 | 1,289 |
| N de Casos Válidos                                                                   | 1313  |      |       |

Cumulative weekly workload < or >= 90h (dichotomous) \* DASS21 Classification - Stress (dichotomous)

### Crosstab

|                                                         |                                                                 |                                                                 | DASS21 Classification - Stress<br>(dichotomous) |                        | Total  |
|---------------------------------------------------------|-----------------------------------------------------------------|-----------------------------------------------------------------|-------------------------------------------------|------------------------|--------|
|                                                         |                                                                 |                                                                 | Normal                                          | Abnormal<br>(elevated) |        |
| Cumulative weekly workload <<br>or >= 90h (dichotomous) | <=90H                                                           | Contagem                                                        | 953                                             | 270                    | 1223   |
|                                                         |                                                                 | % em Cumulative weekly<br>workload < or >= 90h<br>(dichotomous) | 77,9%                                           | 22,1%                  | 100,0% |
|                                                         |                                                                 | % do Total                                                      | 72,6%                                           | 20,6%                  | 93,1%  |
|                                                         | >90H                                                            | Contagem                                                        | 59                                              | 31                     | 90     |
|                                                         |                                                                 | % em Cumulative weekly<br>workload < or >= 90h<br>(dichotomous) | 65,6%                                           | 34,4%                  | 100,0% |
|                                                         |                                                                 | % do Total                                                      | 4,5%                                            | 2,4%                   | 6,9%   |
| Total                                                   | Contagem                                                        |                                                                 | 1012                                            | 301                    | 1313   |
|                                                         | % em Cumulative weekly<br>workload < or >= 90h<br>(dichotomous) |                                                                 | 77,1%                                           | 22,9%                  | 100,0% |
|                                                         | % do Total                                                      |                                                                 | 77,1%                                           | 22,9%                  | 100,0% |

### Testes qui-quadrado

|                                       | Valor              | gl | Significância<br>Assintótica<br>(Bilateral) | Sig exata (2 lados) | Sig exata (1 lado) |
|---------------------------------------|--------------------|----|---------------------------------------------|---------------------|--------------------|
| Qui-quadrado de Pearson               | 7,257 <sup>a</sup> | 1  | ,007                                        |                     |                    |
| Correção de continuidade <sup>b</sup> | 6,574              | 1  | ,010                                        |                     |                    |
| Razão de verossimilhança              | 6,642              | 1  | ,010                                        |                     |                    |
| Teste Exato de Fisher                 |                    |    |                                             | ,009                | ,007               |
| Associação Linear por Linear          | 7,251              | 1  | ,007                                        |                     |                    |
| N de Casos Válidos                    | 1313               |    |                                             |                     |                    |

a. 0 células (,0%) esperavam uma contagem menor que 5. A contagem mínima esperada é 20,63.

b. Computado apenas para uma tabela 2x2

### Medidas Simétricas

|                     |             | Valor | Significância Aproximada |
|---------------------|-------------|-------|--------------------------|
| Nominal por Nominal | Fi          | ,074  | ,007                     |
|                     | V de Cramer | ,074  | ,007                     |
| N de Casos Válidos  |             | 1313  |                          |

### Estimativa de Risco

|                                                                                           | Valor | Intervalo de confiança de 95% |          |
|-------------------------------------------------------------------------------------------|-------|-------------------------------|----------|
|                                                                                           |       | Inferior                      | Superior |
| Razão de Chances para Cumulative weekly workload < or >= 90h (dichotomous) (<=90H / >90H) | 1,855 | 1,176                         | 2,924    |
| Para grupo DASS21 Classification - Stress (dichotomous) = Normal                          | 1,189 | 1,020                         | 1,385    |
| Para grupo DASS21 Classification - Stress (dichotomous) = Abnormal (elevated)             | ,641  | ,473                          | ,869     |
| N de Casos Válidos                                                                        | 1313  |                               |          |

Cumulative weekly workload < or >= 90h (dichotomous) \* PHQ9 Depression Classification - Risk estimate for having current major depressive disorder

### Crosstab

|                                                      |       |                                                           | PHQ9 Depression Classification - Risk estimate for having current major depressive disorder |       |        |
|------------------------------------------------------|-------|-----------------------------------------------------------|---------------------------------------------------------------------------------------------|-------|--------|
|                                                      |       |                                                           | Low                                                                                         | High  | Total  |
| Cumulative weekly workload < or >= 90h (dichotomous) | <=90H | Contagem                                                  | 406                                                                                         | 817   | 1223   |
|                                                      |       | % em Cumulative weekly workload < or >= 90h (dichotomous) | 33,2%                                                                                       | 66,8% | 100,0% |
|                                                      |       | % do Total                                                | 30,9%                                                                                       | 62,2% | 93,1%  |
|                                                      | >90H  | Contagem                                                  | 23                                                                                          | 67    | 90     |
|                                                      |       | % em Cumulative weekly workload < or >= 90h (dichotomous) | 25,6%                                                                                       | 74,4% | 100,0% |
|                                                      |       | % do Total                                                | 1,8%                                                                                        | 5,1%  | 6,9%   |
| Total                                                |       | Contagem                                                  | 429                                                                                         | 884   | 1313   |

|                                                           |       |       |        |
|-----------------------------------------------------------|-------|-------|--------|
| % em Cumulative weekly workload < or >= 90h (dichotomous) | 32,7% | 67,3% | 100,0% |
| % do Total                                                | 32,7% | 67,3% | 100,0% |

### Testes qui-quadrado

|                                       | Valor              | gl | Significância Assintótica (Bilateral) | Sig exata (2 lados) | Sig exata (1 lado) |
|---------------------------------------|--------------------|----|---------------------------------------|---------------------|--------------------|
| Qui-quadrado de Pearson               | 2,225 <sup>a</sup> | 1  | ,136                                  |                     |                    |
| Correção de continuidade <sup>b</sup> | 1,891              | 1  | ,169                                  |                     |                    |
| Razão de verossimilhança              | 2,316              | 1  | ,128                                  |                     |                    |
| Teste Exato de Fisher                 |                    |    |                                       | ,162                | ,083               |
| Associação Linear por Linear          | 2,224              | 1  | ,136                                  |                     |                    |
| N de Casos Válidos                    | 1313               |    |                                       |                     |                    |

a. 0 células (,0%) esperavam uma contagem menor que 5. A contagem mínima esperada é 29,41.

b. Computado apenas para uma tabela 2x2

### Medidas Simétricas

|                     |             | Valor | Significância Aproximada |
|---------------------|-------------|-------|--------------------------|
| Nominal por Nominal | Fi          | ,041  | ,136                     |
|                     | V de Cramer | ,041  | ,136                     |
| N de Casos Válidos  |             | 1313  |                          |

### Estimativa de Risco

|                                                                                                               | Valor | Intervalo de confiança de 95% |          |
|---------------------------------------------------------------------------------------------------------------|-------|-------------------------------|----------|
|                                                                                                               |       | Inferior                      | Superior |
| Razão de Chances para Cumulative weekly workload < or >= 90h (dichotomous) (<=90H / >90H)                     | 1,448 | ,888                          | 2,359    |
| Para grupo PHQ9 Depression Classification - Risk estimate for having current major depressive disorder = Low  | 1,299 | ,905                          | 1,865    |
| Para grupo PHQ9 Depression Classification - Risk estimate for having current major depressive disorder = High | ,897  | ,790                          | 1,019    |
| N de Casos Válidos                                                                                            | 1313  |                               |          |

Cumulative weekly workload < or >= 90h (dichotomous) \* BRCS Classification

### Crosstab

|                                                      |       |                                                           | BRCS Classification |                  | Total  |
|------------------------------------------------------|-------|-----------------------------------------------------------|---------------------|------------------|--------|
|                                                      |       |                                                           | Low resilience      | Moderate to High |        |
| Cumulative weekly workload < or >= 90h (dichotomous) | <=90H | Contagem                                                  | 753                 | 470              | 1223   |
|                                                      |       | % em Cumulative weekly workload < or >= 90h (dichotomous) | 61,6%               | 38,4%            | 100,0% |
|                                                      |       | % do Total                                                | 57,3%               | 35,8%            | 93,1%  |
|                                                      | >90H  | Contagem                                                  | 60                  | 30               | 90     |
|                                                      |       | % em Cumulative weekly workload < or >= 90h (dichotomous) | 66,7%               | 33,3%            | 100,0% |
|                                                      |       | % do Total                                                | 4,6%                | 2,3%             | 6,9%   |
|                                                      | Total | Contagem                                                  | 813                 | 500              | 1313   |
|                                                      |       | % em Cumulative weekly workload < or >= 90h (dichotomous) | 61,9%               | 38,1%            | 100,0% |
|                                                      |       | % do Total                                                | 61,9%               | 38,1%            | 100,0% |

### Testes qui-quadrado

|                                       | Valor             | gl | Significância Assintótica (Bilateral) | Sig exata (2 lados) | Sig exata (1 lado) |
|---------------------------------------|-------------------|----|---------------------------------------|---------------------|--------------------|
| Qui-quadrado de Pearson               | ,924 <sup>a</sup> | 1  | ,337                                  |                     |                    |
| Correção de continuidade <sup>b</sup> | ,720              | 1  | ,396                                  |                     |                    |
| Razão de verossimilhança              | ,939              | 1  | ,333                                  |                     |                    |
| Teste Exato de Fisher                 |                   |    |                                       | ,369                | ,199               |
| Associação Linear por Linear          | ,923              | 1  | ,337                                  |                     |                    |
| N de Casos Válidos                    | 1313              |    |                                       |                     |                    |

a. 0 células (,0%) esperavam uma contagem menor que 5. A contagem mínima esperada é 34,27.

b. Computado apenas para uma tabela 2x2

### Medidas Simétricas

|                     |             | Valor | Significância Aproximada |
|---------------------|-------------|-------|--------------------------|
| Nominal por Nominal | Fi          | -,027 | ,337                     |
|                     | V de Cramer | ,027  | ,337                     |
| N de Casos Válidos  |             | 1313  |                          |

### Estimativa de Risco

|                                                                                           | Valor | Intervalo de confiança de 95% |          |
|-------------------------------------------------------------------------------------------|-------|-------------------------------|----------|
|                                                                                           |       | Inferior                      | Superior |
| Razão de Chances para Cumulative weekly workload < or >= 90h (dichotomous) (<=90H / >90H) | ,801  | ,509                          | 1,260    |
| Para grupo BRCS Classification = Low resilience                                           | ,924  | ,793                          | 1,076    |
| Para grupo BRCS Classification = Moderate to High                                         | 1,153 | ,854                          | 1,557    |
| N de Casos Válidos                                                                        | 1313  |                               |          |

Cumulative weekly workload < or >= 90h (dichotomous) \* OLBI Score Classification

### Crosstab

|                                                      |       | OLBI Score Classification                                 |       | Total |        |
|------------------------------------------------------|-------|-----------------------------------------------------------|-------|-------|--------|
|                                                      |       | Low to Moderate                                           | High  |       |        |
| Cumulative weekly workload < or >= 90h (dichotomous) | <=90H | Contagem                                                  | 829   | 394   | 1223   |
|                                                      |       | % em Cumulative weekly workload < or >= 90h (dichotomous) | 67,8% | 32,2% | 100,0% |
|                                                      |       | % do Total                                                | 63,1% | 30,0% | 93,1%  |
|                                                      | >90H  | Contagem                                                  | 46    | 44    | 90     |
|                                                      |       | % em Cumulative weekly workload < or >= 90h (dichotomous) | 51,1% | 48,9% | 100,0% |
|                                                      |       | % do Total                                                | 3,5%  | 3,4%  | 6,9%   |
|                                                      | Total | Contagem                                                  | 875   | 438   | 1313   |
|                                                      |       | % em Cumulative weekly workload < or >= 90h (dichotomous) | 66,6% | 33,4% | 100,0% |
|                                                      |       | % do Total                                                | 66,6% | 33,4% | 100,0% |

### Testes qui-quadrado

|                                       | Valor               | gl | Significância Assintótica (Bilateral) | Sig exata (2 lados) | Sig exata (1 lado) |
|---------------------------------------|---------------------|----|---------------------------------------|---------------------|--------------------|
| Qui-quadrado de Pearson               | 10,483 <sup>a</sup> | 1  | ,001                                  |                     |                    |
| Correção de continuidade <sup>b</sup> | 9,746               | 1  | ,002                                  |                     |                    |

|                              |        |   |      |      |      |
|------------------------------|--------|---|------|------|------|
| Razão de verossimilhança     | 9,949  | 1 | ,002 |      |      |
| Teste Exato de Fisher        |        |   |      | ,002 | ,001 |
| Associação Linear por Linear | 10,475 | 1 | ,001 |      |      |
| N de Casos Válidos           | 1313   |   |      |      |      |

a. 0 células (,0%) esperavam uma contagem menor que 5. A contagem mínima esperada é 30,02.

b. Computado apenas para uma tabela 2x2

### Medidas Simétricas

|                     |             | Valor | Significância Aproximada |
|---------------------|-------------|-------|--------------------------|
| Nominal por Nominal | Fi          | ,089  | ,001                     |
|                     | V de Cramer | ,089  | ,001                     |
| N de Casos Válidos  |             | 1313  |                          |

### Estimativa de Risco

|                                                                                           | Valor | Intervalo de confiança de 95% |          |
|-------------------------------------------------------------------------------------------|-------|-------------------------------|----------|
|                                                                                           |       | Inferior                      | Superior |
| Razão de Chances para Cumulative weekly workload < or >= 90h (dichotomous) (<=90H / >90H) | 2,013 | 1,309                         | 3,095    |
| Para grupo OLBI Score Classification = Low to Moderate                                    | 1,326 | 1,080                         | 1,629    |
| Para grupo OLBI Score Classification = High                                               | ,659  | ,525                          | ,826     |
| N de Casos Válidos                                                                        | 1313  |                               |          |

The participant exerts professional activity external to the residency program \* DASS21 Classification - Depression (dichotomous)

### Crosstab

|                                                                                |     |                                                                                     | DASS21 Classification - Depression (dichotomous) |                     | Total  |
|--------------------------------------------------------------------------------|-----|-------------------------------------------------------------------------------------|--------------------------------------------------|---------------------|--------|
|                                                                                |     |                                                                                     | Normal                                           | Abnormal (elevated) |        |
| The participant exerts professional activity external to the residency program | No  | Contagem                                                                            | 584                                              | 305                 | 889    |
|                                                                                |     | % em The participant exerts professional activity external to the residency program | 65,7%                                            | 34,3%               | 100,0% |
|                                                                                |     | % do Total                                                                          | 44,5%                                            | 23,2%               | 67,7%  |
|                                                                                | Yes | Contagem                                                                            | 286                                              | 138                 | 424    |

|       |                                                                                     |       |       |        |
|-------|-------------------------------------------------------------------------------------|-------|-------|--------|
| Total | % em The participant exerts professional activity external to the residency program | 67,5% | 32,5% | 100,0% |
|       | % do Total                                                                          | 21,8% | 10,5% | 32,3%  |
|       | Contagem                                                                            | 870   | 443   | 1313   |
|       | % em The participant exerts professional activity external to the residency program | 66,3% | 33,7% | 100,0% |
|       | % do Total                                                                          | 66,3% | 33,7% | 100,0% |

### Testes qui-quadrado

|                                       | Valor             | gl | Significância Assintótica (Bilateral) | Sig exata (2 lados) | Sig exata (1 lado) |
|---------------------------------------|-------------------|----|---------------------------------------|---------------------|--------------------|
| Qui-quadrado de Pearson               | ,398 <sup>a</sup> | 1  | ,528                                  |                     |                    |
| Correção de continuidade <sup>b</sup> | ,323              | 1  | ,570                                  |                     |                    |
| Razão de verossimilhança              | ,399              | 1  | ,527                                  |                     |                    |
| Teste Exato de Fisher                 |                   |    |                                       | ,533                | ,285               |
| Associação Linear por Linear          | ,398              | 1  | ,528                                  |                     |                    |
| N de Casos Válidos                    | 1313              |    |                                       |                     |                    |

a. 0 células (,0%) esperavam uma contagem menor que 5. A contagem mínima esperada é 143,06.

b. Computado apenas para uma tabela 2x2

### Medidas Simétricas

|                     |             | Valor | Significância Aproximada |
|---------------------|-------------|-------|--------------------------|
| Nominal por Nominal | Fi          | -,017 | ,528                     |
|                     | V de Cramer | ,017  | ,528                     |
| N de Casos Válidos  |             | 1313  |                          |

### Estimativa de Risco

|                                                                                                                 | Valor | Intervalo de confiança de 95% |          |
|-----------------------------------------------------------------------------------------------------------------|-------|-------------------------------|----------|
|                                                                                                                 |       | Inferior                      | Superior |
| Razão de Chances para The participant exerts professional activity external to the residency program (No / Yes) | ,924  | ,723                          | 1,181    |
| Para grupo DASS21 Classification - Depression (dichotomous) = Normal                                            | ,974  | ,898                          | 1,056    |
| Para grupo DASS21 Classification - Depression (dichotomous) = Abnormal (elevated)                               | 1,054 | ,894                          | 1,243    |

|                    |      |  |  |
|--------------------|------|--|--|
| N de Casos Válidos | 1313 |  |  |
|--------------------|------|--|--|

The participant exerts professional activity external to the residency program \* DASS21 Classification - Anxiety (dichotomous)

### Crosstab

|                                                                                |                                                                                     |                                                                                     | DASS21 Classification - Anxiety (dichotomous) |                     | Total  |
|--------------------------------------------------------------------------------|-------------------------------------------------------------------------------------|-------------------------------------------------------------------------------------|-----------------------------------------------|---------------------|--------|
|                                                                                |                                                                                     |                                                                                     | Normal                                        | Abnormal (elevated) |        |
| The participant exerts professional activity external to the residency program | No                                                                                  | Contagem                                                                            | 563                                           | 326                 | 889    |
|                                                                                |                                                                                     | % em The participant exerts professional activity external to the residency program | 63,3%                                         | 36,7%               | 100,0% |
|                                                                                |                                                                                     | % do Total                                                                          | 42,9%                                         | 24,8%               | 67,7%  |
|                                                                                | Yes                                                                                 | Contagem                                                                            | 298                                           | 126                 | 424    |
|                                                                                |                                                                                     | % em The participant exerts professional activity external to the residency program | 70,3%                                         | 29,7%               | 100,0% |
|                                                                                |                                                                                     | % do Total                                                                          | 22,7%                                         | 9,6%                | 32,3%  |
| Total                                                                          | Contagem                                                                            |                                                                                     | 861                                           | 452                 | 1313   |
|                                                                                | % em The participant exerts professional activity external to the residency program |                                                                                     | 65,6%                                         | 34,4%               | 100,0% |
|                                                                                | % do Total                                                                          |                                                                                     | 65,6%                                         | 34,4%               | 100,0% |

### Testes qui-quadrado

|                                       | Valor              | gl | Significância Assintótica (Bilateral) | Sig exata (2 lados) | Sig exata (1 lado) |
|---------------------------------------|--------------------|----|---------------------------------------|---------------------|--------------------|
| Qui-quadrado de Pearson               | 6,149 <sup>a</sup> | 1  | ,013                                  |                     |                    |
| Correção de continuidade <sup>b</sup> | 5,845              | 1  | ,016                                  |                     |                    |
| Razão de verossimilhança              | 6,230              | 1  | ,013                                  |                     |                    |
| Teste Exato de Fisher                 |                    |    |                                       | ,013                | ,008               |
| Associação Linear por Linear          | 6,144              | 1  | ,013                                  |                     |                    |
| N de Casos Válidos                    | 1313               |    |                                       |                     |                    |

a. 0 células (,0%) esperavam uma contagem menor que 5. A contagem mínima esperada é 145,96.

b. Computado apenas para uma tabela 2x2

### Medidas Simétricas

|                     |             | Valor | Significância<br>Aproximada |
|---------------------|-------------|-------|-----------------------------|
| Nominal por Nominal | Fi          | -,068 | ,013                        |
|                     | V de Cramer | ,068  | ,013                        |
| N de Casos Válidos  |             | 1313  |                             |

### Estimativa de Risco

|                                                                                                                 | Valor | Intervalo de confiança de 95% |          |
|-----------------------------------------------------------------------------------------------------------------|-------|-------------------------------|----------|
|                                                                                                                 |       | Inferior                      | Superior |
| Razão de Chances para The participant exerts professional activity external to the residency program (No / Yes) | ,730  | ,569                          | ,937     |
| Para grupo DASS21 Classification - Anxiety (dichotomous) = Normal                                               | ,901  | ,832                          | ,976     |
| Para grupo DASS21 Classification - Anxiety (dichotomous) = Abnormal (elevated)                                  | 1,234 | 1,041                         | 1,463    |
| N de Casos Válidos                                                                                              | 1313  |                               |          |

The participant exerts professional activity external to the residency program \* DASS21 Classification - Stress (dichotomous)

### Crosstab

|                                                                                |                                                                                     |                                                                                     | DASS21 Classification - Stress (dichotomous) |                     | Total  |
|--------------------------------------------------------------------------------|-------------------------------------------------------------------------------------|-------------------------------------------------------------------------------------|----------------------------------------------|---------------------|--------|
|                                                                                |                                                                                     |                                                                                     | Normal                                       | Abnormal (elevated) |        |
| The participant exerts professional activity external to the residency program | No                                                                                  | Contagem                                                                            | 680                                          | 209                 | 889    |
|                                                                                |                                                                                     | % em The participant exerts professional activity external to the residency program | 76,5%                                        | 23,5%               | 100,0% |
|                                                                                |                                                                                     | % do Total                                                                          | 51,8%                                        | 15,9%               | 67,7%  |
|                                                                                | Yes                                                                                 | Contagem                                                                            | 332                                          | 92                  | 424    |
|                                                                                |                                                                                     | % em The participant exerts professional activity external to the residency program | 78,3%                                        | 21,7%               | 100,0% |
|                                                                                |                                                                                     | % do Total                                                                          | 25,3%                                        | 7,0%                | 32,3%  |
| Total                                                                          | Contagem                                                                            |                                                                                     | 1012                                         | 301                 | 1313   |
|                                                                                | % em The participant exerts professional activity external to the residency program |                                                                                     | 77,1%                                        | 22,9%               | 100,0% |

| % do Total | 77,1% | 22,9% | 100,0% |
|------------|-------|-------|--------|
|------------|-------|-------|--------|

### Testes qui-quadrado

|                                       | Valor             | gl | Significância<br>Assintótica<br>(Bilateral) | Sig exata (2 lados) | Sig exata (1 lado) |
|---------------------------------------|-------------------|----|---------------------------------------------|---------------------|--------------------|
| Qui-quadrado de Pearson               | ,533 <sup>a</sup> | 1  | ,465                                        |                     |                    |
| Correção de continuidade <sup>b</sup> | ,436              | 1  | ,509                                        |                     |                    |
| Razão de verossimilhança              | ,537              | 1  | ,464                                        |                     |                    |
| Teste Exato de Fisher                 |                   |    |                                             | ,483                | ,255               |
| Associação Linear por Linear          | ,533              | 1  | ,465                                        |                     |                    |
| N de Casos Válidos                    | 1313              |    |                                             |                     |                    |

a. 0 células (,0%) esperavam uma contagem menor que 5. A contagem mínima esperada é 97,20.

b. Computado apenas para uma tabela 2x2

### Medidas Simétricas

|                     |             | Valor | Significância<br>Aproximada |
|---------------------|-------------|-------|-----------------------------|
| Nominal por Nominal | Fi          | -,020 | ,465                        |
|                     | V de Cramer | ,020  | ,465                        |
| N de Casos Válidos  |             | 1313  |                             |

### Estimativa de Risco

|                                                                                                                 | Valor | Intervalo de confiança de 95% |          |
|-----------------------------------------------------------------------------------------------------------------|-------|-------------------------------|----------|
|                                                                                                                 |       | Inferior                      | Superior |
| Razão de Chances para The participant exerts professional activity external to the residency program (No / Yes) | ,902  | ,683                          | 1,191    |
| Para grupo DASS21 Classification - Stress (dichotomous) = Normal                                                | ,977  | ,918                          | 1,039    |
| Para grupo DASS21 Classification - Stress (dichotomous) = Abnormal (elevated)                                   | 1,083 | ,873                          | 1,345    |
| N de Casos Válidos                                                                                              | 1313  |                               |          |

The participant exerts professional activity external to the residency program \* PHQ9 Depression Classification - Risk estimate for having current major depressive disorder

## Crosstab

|                                                                                |                                                                                     |                                                                                     | PHQ9 Depression Classification - Risk estimate for having current major depressive disorder |       | Total  |
|--------------------------------------------------------------------------------|-------------------------------------------------------------------------------------|-------------------------------------------------------------------------------------|---------------------------------------------------------------------------------------------|-------|--------|
|                                                                                |                                                                                     |                                                                                     | Low                                                                                         | High  |        |
| The participant exerts professional activity external to the residency program | No                                                                                  | Contagem                                                                            | 282                                                                                         | 607   | 889    |
|                                                                                |                                                                                     | % em The participant exerts professional activity external to the residency program | 31,7%                                                                                       | 68,3% | 100,0% |
|                                                                                |                                                                                     | % do Total                                                                          | 21,5%                                                                                       | 46,2% | 67,7%  |
|                                                                                | Yes                                                                                 | Contagem                                                                            | 147                                                                                         | 277   | 424    |
|                                                                                |                                                                                     | % em The participant exerts professional activity external to the residency program | 34,7%                                                                                       | 65,3% | 100,0% |
|                                                                                |                                                                                     | % do Total                                                                          | 11,2%                                                                                       | 21,1% | 32,3%  |
| Total                                                                          | Contagem                                                                            |                                                                                     | 429                                                                                         | 884   | 1313   |
|                                                                                | % em The participant exerts professional activity external to the residency program |                                                                                     | 32,7%                                                                                       | 67,3% | 100,0% |
|                                                                                | % do Total                                                                          |                                                                                     | 32,7%                                                                                       | 67,3% | 100,0% |

## Testes qui-quadrado

|                                       | Valor              | gl | Significância Assintótica (Bilateral) | Sig exata (2 lados) | Sig exata (1 lado) |
|---------------------------------------|--------------------|----|---------------------------------------|---------------------|--------------------|
| Qui-quadrado de Pearson               | 1,135 <sup>a</sup> | 1  | ,287                                  |                     |                    |
| Correção de continuidade <sup>b</sup> | 1,005              | 1  | ,316                                  |                     |                    |
| Razão de verossimilhança              | 1,129              | 1  | ,288                                  |                     |                    |
| Teste Exato de Fisher                 |                    |    |                                       | ,286                | ,158               |
| Associação Linear por Linear          | 1,134              | 1  | ,287                                  |                     |                    |
| N de Casos Válidos                    | 1313               |    |                                       |                     |                    |

a. 0 células (,0%) esperavam uma contagem menor que 5. A contagem mínima esperada é 138,53.

b. Computado apenas para uma tabela 2x2

## Medidas Simétricas

|                     |             | Valor | Significância Aproximada |
|---------------------|-------------|-------|--------------------------|
| Nominal por Nominal | Fi          | -,029 | ,287                     |
|                     | V de Cramer | ,029  | ,287                     |
| N de Casos Válidos  |             | 1313  |                          |

## Estimativa de Risco

| Valor | Intervalo de confiança de 95% |
|-------|-------------------------------|
|-------|-------------------------------|

|                                                                                                                 |       | Inferior | Superior |
|-----------------------------------------------------------------------------------------------------------------|-------|----------|----------|
| Razão de Chances para The participant exerts professional activity external to the residency program (No / Yes) | ,875  | ,685     | 1,118    |
| Para grupo PHQ9 Depression Classification - Risk estimate for having current major depressive disorder = Low    | ,915  | ,778     | 1,076    |
| Para grupo PHQ9 Depression Classification - Risk estimate for having current major depressive disorder = High   | 1,045 | ,962     | 1,135    |
| N de Casos Válidos                                                                                              | 1313  |          |          |

The participant exerts professional activity external to the residency program \* BRCS Classification

### Crosstab

|                                                                                |                                                                                     |                                                                                     | BRCS Classification |                  | Total  |
|--------------------------------------------------------------------------------|-------------------------------------------------------------------------------------|-------------------------------------------------------------------------------------|---------------------|------------------|--------|
|                                                                                |                                                                                     |                                                                                     | Low resilience      | Moderate to High |        |
| The participant exerts professional activity external to the residency program | No                                                                                  | Contagem                                                                            | 569                 | 320              | 889    |
|                                                                                |                                                                                     | % em The participant exerts professional activity external to the residency program | 64,0%               | 36,0%            | 100,0% |
|                                                                                |                                                                                     | % do Total                                                                          | 43,3%               | 24,4%            | 67,7%  |
|                                                                                | Yes                                                                                 | Contagem                                                                            | 244                 | 180              | 424    |
|                                                                                |                                                                                     | % em The participant exerts professional activity external to the residency program | 57,5%               | 42,5%            | 100,0% |
|                                                                                |                                                                                     | % do Total                                                                          | 18,6%               | 13,7%            | 32,3%  |
| Total                                                                          | Contagem                                                                            |                                                                                     | 813                 | 500              | 1313   |
|                                                                                | % em The participant exerts professional activity external to the residency program |                                                                                     | 61,9%               | 38,1%            | 100,0% |
|                                                                                | % do Total                                                                          |                                                                                     | 61,9%               | 38,1%            | 100,0% |

### Testes qui-quadrado

|                                       | Valor              | gl | Significância Assintótica (Bilateral) | Sig exata (2 lados) | Sig exata (1 lado) |
|---------------------------------------|--------------------|----|---------------------------------------|---------------------|--------------------|
| Qui-quadrado de Pearson               | 5,077 <sup>a</sup> | 1  | ,024                                  |                     |                    |
| Correção de continuidade <sup>b</sup> | 4,806              | 1  | ,028                                  |                     |                    |

|                              |       |   |      |      |      |
|------------------------------|-------|---|------|------|------|
| Razão de verossimilhança     | 5,044 | 1 | ,025 |      |      |
| Teste Exato de Fisher        |       |   |      | ,025 | ,014 |
| Associação Linear por Linear | 5,073 | 1 | ,024 |      |      |
| N de Casos Válidos           | 1313  |   |      |      |      |

a. 0 células (,0%) esperavam uma contagem menor que 5. A contagem mínima esperada é 161,46.

b. Computado apenas para uma tabela 2x2

### Medidas Simétricas

|                     |             | Valor | Significância Aproximada |
|---------------------|-------------|-------|--------------------------|
| Nominal por Nominal | Fi          | ,062  | ,024                     |
|                     | V de Cramer | ,062  | ,024                     |
| N de Casos Válidos  |             | 1313  |                          |

### Estimativa de Risco

|                                                                                                                 | Valor | Intervalo de confiança de 95% |          |
|-----------------------------------------------------------------------------------------------------------------|-------|-------------------------------|----------|
|                                                                                                                 |       | Inferior                      | Superior |
| Razão de Chances para The participant exerts professional activity external to the residency program (No / Yes) | 1,312 | 1,036                         | 1,661    |
| Para grupo BRCS Classification = Low resilience                                                                 | 1,112 | 1,011                         | 1,224    |
| Para grupo BRCS Classification = Moderate to High                                                               | ,848  | ,736                          | ,977     |
| N de Casos Válidos                                                                                              | 1313  |                               |          |

The participant exerts professional activity external to the residency program \* OLBI Score Classification

### Crosstab

|                                                                                |     |                                                                                     | OLBI Score Classification |       | Total  |
|--------------------------------------------------------------------------------|-----|-------------------------------------------------------------------------------------|---------------------------|-------|--------|
|                                                                                |     |                                                                                     | Low to Moderate           | High  |        |
| The participant exerts professional activity external to the residency program | No  | Contagem                                                                            | 598                       | 291   | 889    |
|                                                                                |     | % em The participant exerts professional activity external to the residency program | 67,3%                     | 32,7% | 100,0% |
|                                                                                |     | % do Total                                                                          | 45,5%                     | 22,2% | 67,7%  |
|                                                                                | Yes | Contagem                                                                            | 277                       | 147   | 424    |

|       |                                                                                     |       |       |        |
|-------|-------------------------------------------------------------------------------------|-------|-------|--------|
|       | % em The participant exerts professional activity external to the residency program | 65,3% | 34,7% | 100,0% |
|       | % do Total                                                                          | 21,1% | 11,2% | 32,3%  |
| Total | Contagem                                                                            | 875   | 438   | 1313   |
|       | % em The participant exerts professional activity external to the residency program | 66,6% | 33,4% | 100,0% |
|       | % do Total                                                                          | 66,6% | 33,4% | 100,0% |

### Testes qui-quadrado

|                                       | Valor             | gl | Significância Assintótica (Bilateral) | Sig exata (2 lados) | Sig exata (1 lado) |
|---------------------------------------|-------------------|----|---------------------------------------|---------------------|--------------------|
| Qui-quadrado de Pearson               | ,484 <sup>a</sup> | 1  | ,487                                  |                     |                    |
| Correção de continuidade <sup>b</sup> | ,401              | 1  | ,527                                  |                     |                    |
| Razão de verossimilhança              | ,483              | 1  | ,487                                  |                     |                    |
| Teste Exato de Fisher                 |                   |    |                                       | ,492                | ,263               |
| Associação Linear por Linear          | ,484              | 1  | ,487                                  |                     |                    |
| N de Casos Válidos                    | 1313              |    |                                       |                     |                    |

a. 0 células (,0%) esperavam uma contagem menor que 5. A contagem mínima esperada é 141,44.

b. Computado apenas para uma tabela 2x2

### Medidas Simétricas

|                     |             | Valor | Significância Aproximada |
|---------------------|-------------|-------|--------------------------|
| Nominal por Nominal | Fi          | ,019  | ,487                     |
|                     | V de Cramer | ,019  | ,487                     |
| N de Casos Válidos  |             | 1313  |                          |

### Estimativa de Risco

|                                                                                                                 | Valor | Intervalo de confiança de 95% |          |
|-----------------------------------------------------------------------------------------------------------------|-------|-------------------------------|----------|
|                                                                                                                 |       | Inferior                      | Superior |
| Razão de Chances para The participant exerts professional activity external to the residency program (No / Yes) | 1,091 | ,854                          | 1,392    |
| Para grupo OLBI Score Classification = Low to Moderate                                                          | 1,030 | ,948                          | 1,119    |
| Para grupo OLBI Score Classification = High                                                                     | ,944  | ,804                          | 1,109    |
| N de Casos Válidos                                                                                              | 1313  |                               |          |

The participant provides direct health care for COVID19 patients \* DASS21 Classification - Depression (dichotomous)

### Crosstab

|                                                                  |       |                                                                       | DASS21 Classification - Depression<br>(dichotomous) |                        | Total  |
|------------------------------------------------------------------|-------|-----------------------------------------------------------------------|-----------------------------------------------------|------------------------|--------|
|                                                                  |       |                                                                       | Normal                                              | Abnormal<br>(elevated) |        |
| The participant provides direct health care for COVID19 patients | No    | Contagem                                                              | 356                                                 | 167                    | 523    |
|                                                                  |       | % em The participant provides direct health care for COVID19 patients | 68,1%                                               | 31,9%                  | 100,0% |
|                                                                  |       | % do Total                                                            | 27,1%                                               | 12,7%                  | 39,8%  |
|                                                                  | Yes   | Contagem                                                              | 514                                                 | 276                    | 790    |
|                                                                  |       | % em The participant provides direct health care for COVID19 patients | 65,1%                                               | 34,9%                  | 100,0% |
|                                                                  |       | % do Total                                                            | 39,1%                                               | 21,0%                  | 60,2%  |
|                                                                  | Total | Contagem                                                              | 870                                                 | 443                    | 1313   |
|                                                                  |       | % em The participant provides direct health care for COVID19 patients | 66,3%                                               | 33,7%                  | 100,0% |
|                                                                  |       | % do Total                                                            | 66,3%                                               | 33,7%                  | 100,0% |

### Testes qui-quadrado

|                                       | Valor              | gl | Significância<br>Assintótica<br>(Bilateral) | Sig exata (2 lados) | Sig exata (1 lado) |
|---------------------------------------|--------------------|----|---------------------------------------------|---------------------|--------------------|
| Qui-quadrado de Pearson               | 1,271 <sup>a</sup> | 1  | ,259                                        |                     |                    |
| Correção de continuidade <sup>b</sup> | 1,141              | 1  | ,286                                        |                     |                    |
| Razão de verossimilhança              | 1,276              | 1  | ,259                                        |                     |                    |
| Teste Exato de Fisher                 |                    |    |                                             | ,283                | ,143               |
| Associação Linear por Linear          | 1,271              | 1  | ,260                                        |                     |                    |
| N de Casos Válidos                    | 1313               |    |                                             |                     |                    |

a. 0 células (,0%) esperavam uma contagem menor que 5. A contagem mínima esperada é 176,46.

b. Computado apenas para uma tabela 2x2

### Medidas Simétricas

| Valor | Significância<br>Aproximada |
|-------|-----------------------------|
|-------|-----------------------------|

|                     |             |      |      |
|---------------------|-------------|------|------|
| Nominal por Nominal | Fi          | ,031 | ,259 |
|                     | V de Cramer | ,031 | ,259 |
| N de Casos Válidos  |             | 1313 |      |

### Estimativa de Risco

|                                                                                                   | Valor | Intervalo de confiança de 95% |          |
|---------------------------------------------------------------------------------------------------|-------|-------------------------------|----------|
|                                                                                                   |       | Inferior                      | Superior |
| Razão de Chances para The participant provides direct health care for COVID19 patients (No / Yes) | 1,145 | ,905                          | 1,448    |
| Para grupo DASS21 Classification - Depression (dichotomous) = Normal                              | 1,046 | ,968                          | 1,131    |
| Para grupo DASS21 Classification - Depression (dichotomous) = Abnormal (elevated)                 | ,914  | ,781                          | 1,070    |
| N de Casos Válidos                                                                                | 1313  |                               |          |

The participant provides direct health care for COVID19 patients \* DASS21 Classification - Anxiety (dichotomous)

### Crosstab

|                                                                  |                                                                       |                                                                       | DASS21 Classification - Anxiety (dichotomous) |                     | Total  |
|------------------------------------------------------------------|-----------------------------------------------------------------------|-----------------------------------------------------------------------|-----------------------------------------------|---------------------|--------|
|                                                                  |                                                                       |                                                                       | Normal                                        | Abnormal (elevated) |        |
| The participant provides direct health care for COVID19 patients | No                                                                    | Contagem                                                              | 346                                           | 177                 | 523    |
|                                                                  |                                                                       | % em The participant provides direct health care for COVID19 patients | 66,2%                                         | 33,8%               | 100,0% |
|                                                                  |                                                                       | % do Total                                                            | 26,4%                                         | 13,5%               | 39,8%  |
|                                                                  | Yes                                                                   | Contagem                                                              | 515                                           | 275                 | 790    |
|                                                                  |                                                                       | % em The participant provides direct health care for COVID19 patients | 65,2%                                         | 34,8%               | 100,0% |
|                                                                  |                                                                       | % do Total                                                            | 39,2%                                         | 20,9%               | 60,2%  |
| Total                                                            | Contagem                                                              |                                                                       | 861                                           | 452                 | 1313   |
|                                                                  | % em The participant provides direct health care for COVID19 patients |                                                                       | 65,6%                                         | 34,4%               | 100,0% |
|                                                                  | % do Total                                                            |                                                                       | 65,6%                                         | 34,4%               | 100,0% |

### Testes qui-quadrado

|                                       | Valor             | gl | Significância<br>Assintótica<br>(Bilateral) | Sig exata (2 lados) | Sig exata (1 lado) |
|---------------------------------------|-------------------|----|---------------------------------------------|---------------------|--------------------|
| Qui-quadrado de Pearson               | ,130 <sup>a</sup> | 1  | ,718                                        |                     |                    |
| Correção de continuidade <sup>b</sup> | ,091              | 1  | ,763                                        |                     |                    |
| Razão de verossimilhança              | ,130              | 1  | ,718                                        |                     |                    |
| Teste Exato de Fisher                 |                   |    |                                             | ,722                | ,382               |
| Associação Linear por Linear          | ,130              | 1  | ,718                                        |                     |                    |
| N de Casos Válidos                    | 1313              |    |                                             |                     |                    |

a. 0 células (,0%) esperavam uma contagem menor que 5. A contagem mínima esperada é 180,04.

b. Computado apenas para uma tabela 2x2

### Medidas Simétricas

|                     |             | Valor | Significância<br>Aproximada |
|---------------------|-------------|-------|-----------------------------|
| Nominal por Nominal | Fi          | ,010  | ,718                        |
|                     | V de Cramer | ,010  | ,718                        |
| N de Casos Válidos  |             | 1313  |                             |

### Estimativa de Risco

|                                                                                                   | Valor | Intervalo de confiança de 95% |          |
|---------------------------------------------------------------------------------------------------|-------|-------------------------------|----------|
|                                                                                                   |       | Inferior                      | Superior |
| Razão de Chances para The participant provides direct health care for COVID19 patients (No / Yes) | 1,044 | ,827                          | 1,318    |
| Para grupo DASS21 Classification - Anxiety (dichotomous) = Normal                                 | 1,015 | ,937                          | 1,099    |
| Para grupo DASS21 Classification - Anxiety (dichotomous) = Abnormal (elevated)                    | ,972  | ,834                          | 1,133    |
| N de Casos Válidos                                                                                | 1313  |                               |          |

The participant provides direct health care for COVID19 patients \* DASS21 Classification - Stress (dichotomous)

### Crosstab

|                                                                  |       |                                                                       | DASS21 Classification - Stress<br>(dichotomous) |                        | Total  |
|------------------------------------------------------------------|-------|-----------------------------------------------------------------------|-------------------------------------------------|------------------------|--------|
|                                                                  |       |                                                                       | Normal                                          | Abnormal<br>(elevated) |        |
| The participant provides direct health care for COVID19 patients | No    | Contagem                                                              | 406                                             | 117                    | 523    |
|                                                                  |       | % em The participant provides direct health care for COVID19 patients | 77,6%                                           | 22,4%                  | 100,0% |
|                                                                  |       | % do Total                                                            | 30,9%                                           | 8,9%                   | 39,8%  |
|                                                                  | Yes   | Contagem                                                              | 606                                             | 184                    | 790    |
|                                                                  |       | % em The participant provides direct health care for COVID19 patients | 76,7%                                           | 23,3%                  | 100,0% |
|                                                                  |       | % do Total                                                            | 46,2%                                           | 14,0%                  | 60,2%  |
|                                                                  | Total | Contagem                                                              | 1012                                            | 301                    | 1313   |
|                                                                  |       | % em The participant provides direct health care for COVID19 patients | 77,1%                                           | 22,9%                  | 100,0% |
|                                                                  |       | % do Total                                                            | 77,1%                                           | 22,9%                  | 100,0% |

### Testes qui-quadrado

|                                       | Valor             | gl | Significância<br>Assintótica<br>(Bilateral) | Sig exata (2 lados) | Sig exata (1 lado) |
|---------------------------------------|-------------------|----|---------------------------------------------|---------------------|--------------------|
| Qui-quadrado de Pearson               | ,151 <sup>a</sup> | 1  | ,698                                        |                     |                    |
| Correção de continuidade <sup>b</sup> | ,103              | 1  | ,748                                        |                     |                    |
| Razão de verossimilhança              | ,151              | 1  | ,697                                        |                     |                    |
| Teste Exato de Fisher                 |                   |    |                                             | ,738                | ,375               |
| Associação Linear por Linear          | ,151              | 1  | ,698                                        |                     |                    |
| N de Casos Válidos                    | 1313              |    |                                             |                     |                    |

a. 0 células (,0%) esperavam uma contagem menor que 5. A contagem mínima esperada é 119,90.

b. Computado apenas para uma tabela 2x2

### Medidas Simétricas

|                     |             | Valor | Significância<br>Aproximada |
|---------------------|-------------|-------|-----------------------------|
| Nominal por Nominal | Fi          | ,011  | ,698                        |
|                     | V de Cramer | ,011  | ,698                        |
| N de Casos Válidos  |             | 1313  |                             |

### Estimativa de Risco

| Valor | Intervalo de confiança de 95% |          |
|-------|-------------------------------|----------|
|       | Inferior                      | Superior |

|                                                                                                   |       |      |       |
|---------------------------------------------------------------------------------------------------|-------|------|-------|
| Razão de Chances para The participant provides direct health care for COVID19 patients (No / Yes) | 1,054 | ,809 | 1,371 |
| Para grupo DASS21 Classification - Stress (dichotomous) = Normal                                  | 1,012 | ,953 | 1,075 |
| Para grupo DASS21 Classification - Stress (dichotomous) = Abnormal (elevated)                     | ,960  | ,783 | 1,178 |
| N de Casos Válidos                                                                                | 1313  |      |       |

The participant provides direct health care for COVID19 patients \* PHQ9 Depression Classification - Risk estimate for having current major depressive disorder

### Crosstab

|                                                                  |                                                                       |                                                                       | PHQ9 Depression Classification - Risk estimate for having current major depressive disorder |       | Total  |
|------------------------------------------------------------------|-----------------------------------------------------------------------|-----------------------------------------------------------------------|---------------------------------------------------------------------------------------------|-------|--------|
|                                                                  |                                                                       |                                                                       | Low                                                                                         | High  |        |
| The participant provides direct health care for COVID19 patients | No                                                                    | Contagem                                                              | 183                                                                                         | 340   | 523    |
|                                                                  |                                                                       | % em The participant provides direct health care for COVID19 patients | 35,0%                                                                                       | 65,0% | 100,0% |
|                                                                  |                                                                       | % do Total                                                            | 13,9%                                                                                       | 25,9% | 39,8%  |
|                                                                  | Yes                                                                   | Contagem                                                              | 246                                                                                         | 544   | 790    |
|                                                                  |                                                                       | % em The participant provides direct health care for COVID19 patients | 31,1%                                                                                       | 68,9% | 100,0% |
|                                                                  |                                                                       | % do Total                                                            | 18,7%                                                                                       | 41,4% | 60,2%  |
| Total                                                            | Contagem                                                              |                                                                       | 429                                                                                         | 884   | 1313   |
|                                                                  | % em The participant provides direct health care for COVID19 patients |                                                                       | 32,7%                                                                                       | 67,3% | 100,0% |
|                                                                  | % do Total                                                            |                                                                       | 32,7%                                                                                       | 67,3% | 100,0% |

### Testes qui-quadrado

|                                       | Valor              | gl | Significância Assintótica (Bilateral) | Sig exata (2 lados) | Sig exata (1 lado) |
|---------------------------------------|--------------------|----|---------------------------------------|---------------------|--------------------|
| Qui-quadrado de Pearson               | 2,122 <sup>a</sup> | 1  | ,145                                  |                     |                    |
| Correção de continuidade <sup>b</sup> | 1,950              | 1  | ,163                                  |                     |                    |
| Razão de verossimilhança              | 2,114              | 1  | ,146                                  |                     |                    |

|                              |       |   |      |      |      |
|------------------------------|-------|---|------|------|------|
| Teste Exato de Fisher        |       |   |      | ,150 | ,081 |
| Associação Linear por Linear | 2,120 | 1 | ,145 |      |      |
| N de Casos Válidos           | 1313  |   |      |      |      |

a. 0 células (,0%) esperavam uma contagem menor que 5. A contagem mínima esperada é 170,88.

b. Computado apenas para uma tabela 2x2

### Medidas Simétricas

|                     |             | Valor | Significância Aproximada |
|---------------------|-------------|-------|--------------------------|
| Nominal por Nominal | Fi          | ,040  | ,145                     |
|                     | V de Cramer | ,040  | ,145                     |
| N de Casos Válidos  |             | 1313  |                          |

### Estimativa de Risco

|                                                                                                               | Valor | Intervalo de confiança de 95% |          |
|---------------------------------------------------------------------------------------------------------------|-------|-------------------------------|----------|
|                                                                                                               |       | Inferior                      | Superior |
| Razão de Chances para The participant provides direct health care for COVID19 patients (No / Yes)             | 1,190 | ,941                          | 1,505    |
| Para grupo PHQ9 Depression Classification - Risk estimate for having current major depressive disorder = Low  | 1,124 | ,961                          | 1,314    |
| Para grupo PHQ9 Depression Classification - Risk estimate for having current major depressive disorder = High | ,944  | ,873                          | 1,021    |
| N de Casos Válidos                                                                                            | 1313  |                               |          |

The participant provides direct health care for COVID19 patients \* BRCS Classification

### Crosstab

|                                                                  |     |                                                                       | BRCS Classification |                  | Total  |
|------------------------------------------------------------------|-----|-----------------------------------------------------------------------|---------------------|------------------|--------|
|                                                                  |     |                                                                       | Low resilience      | Moderate to High |        |
| The participant provides direct health care for COVID19 patients | No  | Contagem                                                              | 333                 | 190              | 523    |
|                                                                  |     | % em The participant provides direct health care for COVID19 patients | 63,7%               | 36,3%            | 100,0% |
|                                                                  |     | % do Total                                                            | 25,4%               | 14,5%            | 39,8%  |
|                                                                  | Yes | Contagem                                                              | 480                 | 310              | 790    |

|       |                                                                       |       |       |        |
|-------|-----------------------------------------------------------------------|-------|-------|--------|
| Total | % em The participant provides direct health care for COVID19 patients | 60,8% | 39,2% | 100,0% |
|       | % do Total                                                            | 36,6% | 23,6% | 60,2%  |
|       | Contagem                                                              | 813   | 500   | 1313   |
|       | % em The participant provides direct health care for COVID19 patients | 61,9% | 38,1% | 100,0% |
|       | % do Total                                                            | 61,9% | 38,1% | 100,0% |

### Testes qui-quadrado

|                                       | Valor              | gl | Significância Assintótica (Bilateral) | Sig exata (2 lados) | Sig exata (1 lado) |
|---------------------------------------|--------------------|----|---------------------------------------|---------------------|--------------------|
| Qui-quadrado de Pearson               | 1,131 <sup>a</sup> | 1  | ,287                                  |                     |                    |
| Correção de continuidade <sup>b</sup> | 1,011              | 1  | ,315                                  |                     |                    |
| Razão de verossimilhança              | 1,134              | 1  | ,287                                  |                     |                    |
| Teste Exato de Fisher                 |                    |    |                                       | ,297                | ,157               |
| Associação Linear por Linear          | 1,131              | 1  | ,288                                  |                     |                    |
| N de Casos Válidos                    | 1313               |    |                                       |                     |                    |

a. 0 células (,0%) esperavam uma contagem menor que 5. A contagem mínima esperada é 199,16.

b. Computado apenas para uma tabela 2x2

### Medidas Simétricas

|                     |             | Valor | Significância Aproximada |
|---------------------|-------------|-------|--------------------------|
| Nominal por Nominal | Fi          | ,029  | ,287                     |
|                     | V de Cramer | ,029  | ,287                     |
| N de Casos Válidos  |             | 1313  |                          |

### Estimativa de Risco

|                                                                                                   | Valor | Intervalo de confiança de 95% |          |
|---------------------------------------------------------------------------------------------------|-------|-------------------------------|----------|
|                                                                                                   |       | Inferior                      | Superior |
| Razão de Chances para The participant provides direct health care for COVID19 patients (No / Yes) | 1,132 | ,901                          | 1,422    |
| Para grupo BRCS Classification = Low resilience                                                   | 1,048 | ,962                          | 1,142    |
| Para grupo BRCS Classification = Moderate to High                                                 | ,926  | ,803                          | 1,068    |
| N de Casos Válidos                                                                                | 1313  |                               |          |

The participant provides direct health care for COVID19 patients \* OLBI Score Classification

### Crosstab

|                                                                  |       |                                                                       | OLBI Score Classification |       | Total  |
|------------------------------------------------------------------|-------|-----------------------------------------------------------------------|---------------------------|-------|--------|
|                                                                  |       |                                                                       | Low to Moderate           | High  |        |
| The participant provides direct health care for COVID19 patients | No    | Contagem                                                              | 352                       | 171   | 523    |
|                                                                  |       | % em The participant provides direct health care for COVID19 patients | 67,3%                     | 32,7% | 100,0% |
|                                                                  |       | % do Total                                                            | 26,8%                     | 13,0% | 39,8%  |
|                                                                  | Yes   | Contagem                                                              | 523                       | 267   | 790    |
|                                                                  |       | % em The participant provides direct health care for COVID19 patients | 66,2%                     | 33,8% | 100,0% |
|                                                                  |       | % do Total                                                            | 39,8%                     | 20,3% | 60,2%  |
|                                                                  | Total | Contagem                                                              | 875                       | 438   | 1313   |
|                                                                  |       | % em The participant provides direct health care for COVID19 patients | 66,6%                     | 33,4% | 100,0% |
|                                                                  |       | % do Total                                                            | 66,6%                     | 33,4% | 100,0% |

### Testes qui-quadrado

|                                       | Valor             | gl | Significância Assintótica (Bilateral) | Sig exata (2 lados) | Sig exata (1 lado) |
|---------------------------------------|-------------------|----|---------------------------------------|---------------------|--------------------|
| Qui-quadrado de Pearson               | ,172 <sup>a</sup> | 1  | ,679                                  |                     |                    |
| Correção de continuidade <sup>b</sup> | ,126              | 1  | ,723                                  |                     |                    |
| Razão de verossimilhança              | ,172              | 1  | ,678                                  |                     |                    |
| Teste Exato de Fisher                 |                   |    |                                       | ,720                | ,362               |
| Associação Linear por Linear          | ,172              | 1  | ,679                                  |                     |                    |
| N de Casos Válidos                    | 1313              |    |                                       |                     |                    |

a. 0 células (,0%) esperavam uma contagem menor que 5. A contagem mínima esperada é 174,47.

b. Computado apenas para uma tabela 2x2

### Medidas Simétricas

|                     |             | Valor | Significância Aproximada |
|---------------------|-------------|-------|--------------------------|
| Nominal por Nominal | Fi          | ,011  | ,679                     |
|                     | V de Cramer | ,011  | ,679                     |

|                    |      |
|--------------------|------|
| N de Casos Válidos | 1313 |
|--------------------|------|

### Estimativa de Risco

|                                                                                                   | Valor | Intervalo de confiança de 95% |          |
|---------------------------------------------------------------------------------------------------|-------|-------------------------------|----------|
|                                                                                                   |       | Inferior                      | Superior |
| Razão de Chances para The participant provides direct health care for COVID19 patients (No / Yes) | 1,051 | ,831                          | 1,329    |
| Para grupo OLBI Score Classification = Low to Moderate                                            | 1,017 | ,941                          | 1,099    |
| Para grupo OLBI Score Classification = High                                                       | ,967  | ,827                          | 1,132    |
| N de Casos Válidos                                                                                | 1313  |                               |          |

### CROSSTABS

```

/TABLES=BRCS_Classif BY DASS21_Classif_D2c DASS21_Classif_A2c DASS21_Classif_S2c PHQ9_Classif
  OLBI_Classif_2c
/FORMAT=AVALUE TABLES
/STATISTICS=CHISQ PHI RISK
/CELLS=COUNT ROW TOTAL
/COUNT ROUND CELL.

```

Tabulações cruzadas

### Observações

|                             |                                             |                                                                      |
|-----------------------------|---------------------------------------------|----------------------------------------------------------------------|
| Saída criada                |                                             | 20-SEP-2020 11:50:52                                                 |
| Comentários                 |                                             |                                                                      |
| Entrada                     | Dados                                       | C:\Users\User\Documents\Pesquisa\Fellow\FellowGenData_V1.sav         |
|                             | Conjunto de dados ativo                     | ConjuntodeDados1                                                     |
|                             | Filtro                                      | <none>                                                               |
|                             | Ponderação                                  | <none>                                                               |
|                             | Arquivo Dividido                            | <none>                                                               |
|                             | N de linhas em arquivo de dados de trabalho | 1313                                                                 |
| Tratamento de valor omissos | Definição de omissos                        | Os valores omissos definidos pelo usuário são tratados como omissos. |

|                  |                       |                                                                                                                                                                                                                                                  |
|------------------|-----------------------|--------------------------------------------------------------------------------------------------------------------------------------------------------------------------------------------------------------------------------------------------|
| Casos utilizados |                       | As estatísticas de cada tabela são baseadas em todos os casos com dados válidos na(s) amplitude(s) especificada(s) para todas as variáveis de cada tabela.                                                                                       |
| Sintaxe          |                       | CROSSTABS<br>/TABLES=BRCS_Classif BY<br>DASS21_Classif_D2c<br>DASS21_Classif_A2c<br>DASS21_Classif_S2c<br>PHQ9_Classif<br>OLBI_Classif_2c<br>/FORMAT=AVALUE TABLES<br>/STATISTICS=CHISQ PHI RISK<br>/CELLS=COUNT ROW TOTAL<br>/COUNT ROUND CELL. |
| Recursos         | Tempo do processador  | 00:00:00,02                                                                                                                                                                                                                                      |
|                  | Tempo decorrido       | 00:00:00,02                                                                                                                                                                                                                                      |
|                  | Dimensões solicitadas | 2                                                                                                                                                                                                                                                |
|                  | Células disponíveis   | 524245                                                                                                                                                                                                                                           |

BRCS Classification \* DASS21 Classification - Depression (dichotomous)

### Crosstab

|                     |                          |                          | DASS21 Classification - Depression<br>(dichotomous) |                        | Total  |
|---------------------|--------------------------|--------------------------|-----------------------------------------------------|------------------------|--------|
|                     |                          |                          | Normal                                              | Abnormal<br>(elevated) |        |
| BRCS Classification | Low resilience           | Contagem                 | 460                                                 | 353                    | 813    |
|                     |                          | % em BRCS Classification | 56,6%                                               | 43,4%                  | 100,0% |
|                     |                          | % do Total               | 35,0%                                               | 26,9%                  | 61,9%  |
|                     | Moderate to High         | Contagem                 | 410                                                 | 90                     | 500    |
|                     |                          | % em BRCS Classification | 82,0%                                               | 18,0%                  | 100,0% |
|                     |                          | % do Total               | 31,2%                                               | 6,9%                   | 38,1%  |
| Total               | Contagem                 |                          | 870                                                 | 443                    | 1313   |
|                     | % em BRCS Classification |                          | 66,3%                                               | 33,7%                  | 100,0% |
|                     | % do Total               |                          | 66,3%                                               | 33,7%                  | 100,0% |

### Testes qui-quadrado

| Valor | gl | Significância<br>Assintótica<br>(Bilateral) | Sig exata (2 lados) | Sig exata (1 lado) |
|-------|----|---------------------------------------------|---------------------|--------------------|
|-------|----|---------------------------------------------|---------------------|--------------------|

|                                       |                     |   |      |      |      |
|---------------------------------------|---------------------|---|------|------|------|
| Qui-quadrado de Pearson               | 89,482 <sup>a</sup> | 1 | ,000 |      |      |
| Correção de continuidade <sup>b</sup> | 88,348              | 1 | ,000 |      |      |
| Razão de verossimilhança              | 94,455              | 1 | ,000 |      |      |
| Teste Exato de Fisher                 |                     |   |      | ,000 | ,000 |
| Associação Linear por Linear          | 89,414              | 1 | ,000 |      |      |
| N de Casos Válidos                    | 1313                |   |      |      |      |

a. 0 células (,0%) esperavam uma contagem menor que 5. A contagem mínima esperada é 168,70.

b. Computado apenas para uma tabela 2x2

### Medidas Simétricas

|                     |             | Valor | Significância Aproximada |
|---------------------|-------------|-------|--------------------------|
| Nominal por Nominal | Fi          | -,261 | ,000                     |
|                     | V de Cramer | ,261  | ,000                     |
| N de Casos Válidos  |             | 1313  |                          |

### Estimativa de Risco

|                                                                                   | Valor | Intervalo de confiança de 95% |          |
|-----------------------------------------------------------------------------------|-------|-------------------------------|----------|
|                                                                                   |       | Inferior                      | Superior |
| Razão de Chances para BRCS Classification (Low resilience / Moderate to High)     | ,286  | ,219                          | ,374     |
| Para grupo DASS21 Classification - Depression (dichotomous) = Normal              | ,690  | ,642                          | ,742     |
| Para grupo DASS21 Classification - Depression (dichotomous) = Abnormal (elevated) | 2,412 | 1,969                         | 2,955    |
| N de Casos Válidos                                                                | 1313  |                               |          |

BRCS Classification \* DASS21 Classification - Anxiety (dichotomous)

### Crosstab

|                     |                |                          | DASS21 Classification - Anxiety (dichotomous) |                     | Total  |
|---------------------|----------------|--------------------------|-----------------------------------------------|---------------------|--------|
|                     |                |                          | Normal                                        | Abnormal (elevated) |        |
| BRCS Classification | Low resilience | Contagem                 | 478                                           | 335                 | 813    |
|                     |                | % em BRCS Classification | 58,8%                                         | 41,2%               | 100,0% |
|                     |                | % do Total               | 36,4%                                         | 25,5%               | 61,9%  |

|                  |                          |       |       |        |
|------------------|--------------------------|-------|-------|--------|
| Moderate to High | Contagem                 | 383   | 117   | 500    |
|                  | % em BRCS Classification | 76,6% | 23,4% | 100,0% |
|                  | % do Total               | 29,2% | 8,9%  | 38,1%  |
| Total            | Contagem                 | 861   | 452   | 1313   |
|                  | % em BRCS Classification | 65,6% | 34,4% | 100,0% |
|                  | % do Total               | 65,6% | 34,4% | 100,0% |

### Testes qui-quadrado

|                                       | Valor               | gl | Significância<br>Assintótica<br>(Bilateral) | Sig exata (2 lados) | Sig exata (1 lado) |
|---------------------------------------|---------------------|----|---------------------------------------------|---------------------|--------------------|
| Qui-quadrado de Pearson               | 43,480 <sup>a</sup> | 1  | ,000                                        |                     |                    |
| Correção de continuidade <sup>b</sup> | 42,695              | 1  | ,000                                        |                     |                    |
| Razão de verossimilhança              | 44,818              | 1  | ,000                                        |                     |                    |
| Teste Exato de Fisher                 |                     |    |                                             | ,000                | ,000               |
| Associação Linear por Linear          | 43,447              | 1  | ,000                                        |                     |                    |
| N de Casos Válidos                    | 1313                |    |                                             |                     |                    |

a. 0 células (,0%) esperavam uma contagem menor que 5. A contagem mínima esperada é 172,12.

b. Computado apenas para uma tabela 2x2

### Medidas Simétricas

|                     |             | Valor | Significância<br>Aproximada |
|---------------------|-------------|-------|-----------------------------|
| Nominal por Nominal | Fi          | -,182 | ,000                        |
|                     | V de Cramer | ,182  | ,000                        |
| N de Casos Válidos  |             | 1313  |                             |

### Estimativa de Risco

|                                                                                | Valor | Intervalo de confiança de 95% |          |
|--------------------------------------------------------------------------------|-------|-------------------------------|----------|
|                                                                                |       | Inferior                      | Superior |
| Razão de Chances para BRCS Classification (Low resilience / Moderate to High)  | ,436  | ,340                          | ,560     |
| Para grupo DASS21 Classification - Anxiety (dichotomous) = Normal              | ,768  | ,712                          | ,828     |
| Para grupo DASS21 Classification - Anxiety (dichotomous) = Abnormal (elevated) | 1,761 | 1,473                         | 2,105    |
| N de Casos Válidos                                                             | 1313  |                               |          |

### Crosstab

|                     |                          |                          | DASS21 Classification - Stress<br>(dichotomous) |                        |        |
|---------------------|--------------------------|--------------------------|-------------------------------------------------|------------------------|--------|
|                     |                          |                          | Normal                                          | Abnormal<br>(elevated) | Total  |
| BRCS Classification | Low resilience           | Contagem                 | 577                                             | 236                    | 813    |
|                     |                          | % em BRCS Classification | 71,0%                                           | 29,0%                  | 100,0% |
|                     |                          | % do Total               | 43,9%                                           | 18,0%                  | 61,9%  |
|                     | Moderate to High         | Contagem                 | 435                                             | 65                     | 500    |
|                     |                          | % em BRCS Classification | 87,0%                                           | 13,0%                  | 100,0% |
|                     |                          | % do Total               | 33,1%                                           | 5,0%                   | 38,1%  |
| Total               | Contagem                 |                          | 1012                                            | 301                    | 1313   |
|                     | % em BRCS Classification |                          | 77,1%                                           | 22,9%                  | 100,0% |
|                     | % do Total               |                          | 77,1%                                           | 22,9%                  | 100,0% |

### Testes qui-quadrado

|                                       | Valor               | gl | Significância<br>Assintótica<br>(Bilateral) | Sig exata (2 lados) | Sig exata (1 lado) |
|---------------------------------------|---------------------|----|---------------------------------------------|---------------------|--------------------|
| Qui-quadrado de Pearson               | 45,015 <sup>a</sup> | 1  | ,000                                        |                     |                    |
| Correção de continuidade <sup>b</sup> | 44,112              | 1  | ,000                                        |                     |                    |
| Razão de verossimilhança              | 47,846              | 1  | ,000                                        |                     |                    |
| Teste Exato de Fisher                 |                     |    |                                             | ,000                | ,000               |
| Associação Linear por Linear          | 44,980              | 1  | ,000                                        |                     |                    |
| N de Casos Válidos                    | 1313                |    |                                             |                     |                    |

a. 0 células (,0%) esperavam uma contagem menor que 5. A contagem mínima esperada é 114,62.

b. Computado apenas para uma tabela 2x2

### Medidas Simétricas

|                     |             | Valor | Significância<br>Aproximada |
|---------------------|-------------|-------|-----------------------------|
| Nominal por Nominal | Fi          | -,185 | ,000                        |
|                     | V de Cramer | ,185  | ,000                        |
| N de Casos Válidos  |             | 1313  |                             |

### Estimativa de Risco

| Valor | Intervalo de confiança de 95% |          |
|-------|-------------------------------|----------|
|       | Inferior                      | Superior |

|                                                                               |       |       |       |
|-------------------------------------------------------------------------------|-------|-------|-------|
| Razão de Chances para BRCS Classification (Low resilience / Moderate to High) | ,365  | ,270  | ,494  |
| Para grupo DASS21 Classification - Stress (dichotomous) = Normal              | ,816  | ,772  | ,862  |
| Para grupo DASS21 Classification - Stress (dichotomous) = Abnormal (elevated) | 2,233 | 1,737 | 2,870 |
| N de Casos Válidos                                                            | 1313  |       |       |

BRCS Classification \* PHQ9 Depression Classification - Risk estimate for having current major depressive disorder

### Crosstab

|                     |                          |                          | PHQ9 Depression Classification - Risk estimate for having current major depressive disorder |       |        |
|---------------------|--------------------------|--------------------------|---------------------------------------------------------------------------------------------|-------|--------|
|                     |                          |                          | Low                                                                                         | High  | Total  |
| BRCS Classification | Low resilience           | Contagem                 | 180                                                                                         | 633   | 813    |
|                     |                          | % em BRCS Classification | 22,1%                                                                                       | 77,9% | 100,0% |
|                     |                          | % do Total               | 13,7%                                                                                       | 48,2% | 61,9%  |
|                     | Moderate to High         | Contagem                 | 249                                                                                         | 251   | 500    |
|                     |                          | % em BRCS Classification | 49,8%                                                                                       | 50,2% | 100,0% |
|                     |                          | % do Total               | 19,0%                                                                                       | 19,1% | 38,1%  |
| Total               | Contagem                 |                          | 429                                                                                         | 884   | 1313   |
|                     | % em BRCS Classification |                          | 32,7%                                                                                       | 67,3% | 100,0% |
|                     | % do Total               |                          | 32,7%                                                                                       | 67,3% | 100,0% |

### Testes qui-quadrado

|                                       | Valor                | gl | Significância Assintótica (Bilateral) | Sig exata (2 lados) | Sig exata (1 lado) |
|---------------------------------------|----------------------|----|---------------------------------------|---------------------|--------------------|
| Qui-quadrado de Pearson               | 107,675 <sup>a</sup> | 1  | ,000                                  |                     |                    |
| Correção de continuidade <sup>b</sup> | 106,421              | 1  | ,000                                  |                     |                    |
| Razão de verossimilhança              | 106,445              | 1  | ,000                                  |                     |                    |
| Teste Exato de Fisher                 |                      |    |                                       | ,000                | ,000               |
| Associação Linear por Linear          | 107,593              | 1  | ,000                                  |                     |                    |
| N de Casos Válidos                    | 1313                 |    |                                       |                     |                    |

a. 0 células (,0%) esperavam uma contagem menor que 5. A contagem mínima esperada é 163,37.

b. Computado apenas para uma tabela 2x2

## Medidas Simétricas

|                     |             | Valor | Significância Aproximada |
|---------------------|-------------|-------|--------------------------|
| Nominal por Nominal | Fi          | -,286 | ,000                     |
|                     | V de Cramer | ,286  | ,000                     |
| N de Casos Válidos  |             | 1313  |                          |

## Estimativa de Risco

|                                                                                                               | Valor | Intervalo de confiança de 95% |          |
|---------------------------------------------------------------------------------------------------------------|-------|-------------------------------|----------|
|                                                                                                               |       | Inferior                      | Superior |
| Razão de Chances para BRCS Classification (Low resilience / Moderate to High)                                 | ,287  | ,225                          | ,365     |
| Para grupo PHQ9 Depression Classification - Risk estimate for having current major depressive disorder = Low  | ,445  | ,380                          | ,520     |
| Para grupo PHQ9 Depression Classification - Risk estimate for having current major depressive disorder = High | 1,551 | 1,411                         | 1,705    |
| N de Casos Válidos                                                                                            | 1313  |                               |          |

BRCS Classification \* OLBI Score Classification

## Crosstab

|                     |                          |                          | OLBI Score Classification |       | Total  |
|---------------------|--------------------------|--------------------------|---------------------------|-------|--------|
|                     |                          |                          | Low to Moderate           | High  |        |
| BRCS Classification | Low resilience           | Contagem                 | 468                       | 345   | 813    |
|                     |                          | % em BRCS Classification | 57,6%                     | 42,4% | 100,0% |
|                     |                          | % do Total               | 35,6%                     | 26,3% | 61,9%  |
|                     | Moderate to High         | Contagem                 | 407                       | 93    | 500    |
|                     |                          | % em BRCS Classification | 81,4%                     | 18,6% | 100,0% |
|                     |                          | % do Total               | 31,0%                     | 7,1%  | 38,1%  |
| Total               | Contagem                 |                          | 875                       | 438   | 1313   |
|                     | % em BRCS Classification |                          | 66,6%                     | 33,4% | 100,0% |
|                     | % do Total               |                          | 66,6%                     | 33,4% | 100,0% |

## Testes qui-quadrado

|                                       | Valor               | gl | Significância<br>Assintótica<br>(Bilateral) | Sig exata (2 lados) | Sig exata (1 lado) |
|---------------------------------------|---------------------|----|---------------------------------------------|---------------------|--------------------|
| Qui-quadrado de Pearson               | 79,120 <sup>a</sup> | 1  | ,000                                        |                     |                    |
| Correção de continuidade <sup>b</sup> | 78,052              | 1  | ,000                                        |                     |                    |
| Razão de verossimilhança              | 83,200              | 1  | ,000                                        |                     |                    |
| Teste Exato de Fisher                 |                     |    |                                             | ,000                | ,000               |
| Associação Linear por Linear          | 79,060              | 1  | ,000                                        |                     |                    |
| N de Casos Válidos                    | 1313                |    |                                             |                     |                    |

a. 0 células (,0%) esperavam uma contagem menor que 5. A contagem mínima esperada é 166,79.

b. Computado apenas para uma tabela 2x2

### Medidas Simétricas

|                     |             | Valor | Significância<br>Aproximada |
|---------------------|-------------|-------|-----------------------------|
| Nominal por Nominal | Fi          | -,245 | ,000                        |
|                     | V de Cramer | ,245  | ,000                        |
| N de Casos Válidos  |             | 1313  |                             |

### Estimativa de Risco

|                                                                                     | Valor | Intervalo de confiança de 95% |          |
|-------------------------------------------------------------------------------------|-------|-------------------------------|----------|
|                                                                                     |       | Inferior                      | Superior |
| Razão de Chances para BRCS<br>Classification (Low resilience /<br>Moderate to High) | ,310  | ,238                          | ,404     |
| Para grupo OLBI Score<br>Classification = Low to Moderate                           | ,707  | ,658                          | ,760     |
| Para grupo OLBI Score<br>Classification = High                                      | 2,281 | 1,868                         | 2,787    |
| N de Casos Válidos                                                                  | 1313  |                               |          |

### CROSSTABS

```

/TABLES=RsPrgType BY Sex Race ComorbAny HRiskFactor DASS21_Classif_D2c DASS21_Classif_A2c
DASS21_Classif_S2c PHQ9_Classif BRCS_Classif OLBI_Classif_2c Autonomy_Classif PedagStr_Classif
PPEAvail_Classif ExternWork CovidCare Wkload_5P
/FORMAT=AVALUE TABLES
/STATISTICS=CHISQ PHI RISK
/CELLS=COUNT ROW TOTAL
/COUNT ROUND CELL.

```

## Observações

|                             |                                             |                                                                                                                                                                                                                                                                                                                                                                                         |
|-----------------------------|---------------------------------------------|-----------------------------------------------------------------------------------------------------------------------------------------------------------------------------------------------------------------------------------------------------------------------------------------------------------------------------------------------------------------------------------------|
| Saída criada                |                                             | 20-SEP-2020 12:03:39                                                                                                                                                                                                                                                                                                                                                                    |
| Comentários                 |                                             |                                                                                                                                                                                                                                                                                                                                                                                         |
| Entrada                     | Dados                                       | C:\Users\User\Documents\Pesquisa\Fellow\FellowGenData_V1.sav                                                                                                                                                                                                                                                                                                                            |
|                             | Conjunto de dados ativo                     | ConjuntodeDados1                                                                                                                                                                                                                                                                                                                                                                        |
|                             | Filtro                                      | <none>                                                                                                                                                                                                                                                                                                                                                                                  |
|                             | Ponderação                                  | <none>                                                                                                                                                                                                                                                                                                                                                                                  |
|                             | Arquivo Dividido                            | <none>                                                                                                                                                                                                                                                                                                                                                                                  |
|                             | N de linhas em arquivo de dados de trabalho | 1313                                                                                                                                                                                                                                                                                                                                                                                    |
|                             |                                             |                                                                                                                                                                                                                                                                                                                                                                                         |
| Tratamento de valor omissos | Definição de omissos                        | Os valores omissos definidos pelo usuário são tratados como omissos.                                                                                                                                                                                                                                                                                                                    |
|                             | Casos utilizados                            | As estatísticas de cada tabela são baseadas em todos os casos com dados válidos na(s) amplitude(s) especificada(s) para todas as variáveis de cada tabela.                                                                                                                                                                                                                              |
| Sintaxe                     |                                             | CROSSTABS<br>/TABLES=RsPrgType BY Sex<br>Race ComorbAny HRiskFactor<br>DASS21_Classif_D2c<br>DASS21_Classif_A2c<br>DASS21_Classif_S2c<br>PHQ9_Classif BRCS_Classif<br>OLBI_Classif_2c Autonomy_Classif<br>PedagStr_Classif<br>PPEAvail_Classif ExternWork<br>CovidCare Wkload_5P<br>/FORMAT=AVALUE TABLES<br>/STATISTICS=CHISQ PHI RISK<br>/CELLS=COUNT ROW TOTAL<br>/COUNT ROUND CELL. |
| Recursos                    | Tempo do processador                        | 00:00:00,05                                                                                                                                                                                                                                                                                                                                                                             |
|                             | Tempo decorrido                             | 00:00:00,05                                                                                                                                                                                                                                                                                                                                                                             |
|                             | Dimensões solicitadas                       | 2                                                                                                                                                                                                                                                                                                                                                                                       |
|                             | Células disponíveis                         | 524245                                                                                                                                                                                                                                                                                                                                                                                  |

## Resumo de processamento de casos

|                             | Válidos |             | Casos Omissos |             | Total |             |
|-----------------------------|---------|-------------|---------------|-------------|-------|-------------|
|                             | N       | Porcentagem | N             | Porcentagem | N     | Porcentagem |
| Type of residency program * | 1310    | 99,8%       | 3             | 0,2%        | 1313  | 100,0%      |
| Sex                         |         |             |               |             |       |             |

|                                                                                                                                                                               |      |        |   |      |      |        |
|-------------------------------------------------------------------------------------------------------------------------------------------------------------------------------|------|--------|---|------|------|--------|
| Type of residency program *<br>Race                                                                                                                                           | 1313 | 100,0% | 0 | 0,0% | 1313 | 100,0% |
| Type of residency program *<br>Any comorbidity (regardless<br>COVID risk)                                                                                                     | 1305 | 99,4%  | 8 | 0,6% | 1313 | 100,0% |
| Type of residency program *<br>Risk factor(s) for severe<br>COVID19                                                                                                           | 1305 | 99,4%  | 8 | 0,6% | 1313 | 100,0% |
| Type of residency program *<br>DASS21 Classification -<br>Depression (dichotomous)                                                                                            | 1313 | 100,0% | 0 | 0,0% | 1313 | 100,0% |
| Type of residency program *<br>DASS21 Classification - Anxiety<br>(dichotomous)                                                                                               | 1313 | 100,0% | 0 | 0,0% | 1313 | 100,0% |
| Type of residency program *<br>DASS21 Classification - Stress<br>(dichotomous)                                                                                                | 1313 | 100,0% | 0 | 0,0% | 1313 | 100,0% |
| Type of residency program *<br>PHQ9 Depression Classification<br>- Risk estimate for having<br>current major depressive<br>disorder                                           | 1313 | 100,0% | 0 | 0,0% | 1313 | 100,0% |
| Type of residency program *<br>BRCS Classification                                                                                                                            | 1313 | 100,0% | 0 | 0,0% | 1313 | 100,0% |
| Type of residency program *<br>OLBI Score Classification                                                                                                                      | 1313 | 100,0% | 0 | 0,0% | 1313 | 100,0% |
| Type of residency program *<br>Classification of the perceived<br>autonomy to self-conduct in the<br>residency program                                                        | 1313 | 100,0% | 0 | 0,0% | 1313 | 100,0% |
| Type of residency program *<br>Perceived adequacy of the<br>pedagogic structure and<br>availability of resources in the<br>residency program                                  | 1313 | 100,0% | 0 | 0,0% | 1313 | 100,0% |
| Type of residency program *<br>Perceived adequacy of the<br>availability of personal<br>protective equipment, when<br>providing care for patients in the<br>residency program | 1313 | 100,0% | 0 | 0,0% | 1313 | 100,0% |
| Type of residency program *<br>The participant exerts<br>professional activity external to<br>the residency program                                                           | 1313 | 100,0% | 0 | 0,0% | 1313 | 100,0% |

|                                                                                                       |      |        |   |      |      |        |
|-------------------------------------------------------------------------------------------------------|------|--------|---|------|------|--------|
| Type of residency program *<br>The participant provides direct<br>health care for COVID19<br>patients | 1313 | 100,0% | 0 | 0,0% | 1313 | 100,0% |
| Type of residency program *<br>Cumulative weekly workload<br>(five categories)                        | 1313 | 100,0% | 0 | 0,0% | 1313 | 100,0% |

Type of residency program \* Sex

### Crosstab

|                           |                         |                                | Sex                            |        |        |        |
|---------------------------|-------------------------|--------------------------------|--------------------------------|--------|--------|--------|
|                           |                         |                                | Male                           | Female | Total  |        |
| Type of residency program | Non-Medical (Other HCP) | Contagem                       | 87                             | 549    | 636    |        |
|                           |                         | % em Type of residency program | 13,7%                          | 86,3%  | 100,0% |        |
|                           |                         | % do Total                     | 6,6%                           | 41,9%  | 48,5%  |        |
|                           | Medical                 | Contagem                       | 198                            | 476    | 674    |        |
|                           |                         | % em Type of residency program | 29,4%                          | 70,6%  | 100,0% |        |
|                           |                         | % do Total                     | 15,1%                          | 36,3%  | 51,5%  |        |
| Total                     |                         |                                | Contagem                       | 285    | 1025   | 1310   |
|                           |                         |                                | % em Type of residency program | 21,8%  | 78,2%  | 100,0% |
|                           |                         |                                | % do Total                     | 21,8%  | 78,2%  | 100,0% |

### Testes qui-quadrado

|                                       | Valor               | gl | Significância<br>Assintótica<br>(Bilateral) | Sig exata (2 lados) | Sig exata (1 lado) |
|---------------------------------------|---------------------|----|---------------------------------------------|---------------------|--------------------|
| Qui-quadrado de Pearson               | 47,368 <sup>a</sup> | 1  | ,000                                        |                     |                    |
| Correção de continuidade <sup>b</sup> | 46,450              | 1  | ,000                                        |                     |                    |
| Razão de verossimilhança              | 48,498              | 1  | ,000                                        |                     |                    |
| Teste Exato de Fisher                 |                     |    |                                             | ,000                | ,000               |
| Associação Linear por Linear          | 47,332              | 1  | ,000                                        |                     |                    |
| N de Casos Válidos                    | 1310                |    |                                             |                     |                    |

a. 0 células (,0%) esperavam uma contagem menor que 5. A contagem mínima esperada é 138,37.

b. Computado apenas para uma tabela 2x2

### Medidas Simétricas

|                     |    | Valor | Significância<br>Aproximada |
|---------------------|----|-------|-----------------------------|
| Nominal por Nominal | Fi | -,190 | ,000                        |

|                    |      |      |
|--------------------|------|------|
| V de Cramer        | ,190 | ,000 |
| N de Casos Válidos | 1310 |      |

### Estimativa de Risco

|                                                                                     | Valor | Intervalo de confiança de 95% |          |
|-------------------------------------------------------------------------------------|-------|-------------------------------|----------|
|                                                                                     |       | Inferior                      | Superior |
| Razão de Chances para Type of residency program (Non-Medical (Other HCP) / Medical) | ,381  | ,288                          | ,504     |
| Para grupo Sex = Male                                                               | ,466  | ,371                          | ,585     |
| Para grupo Sex = Female                                                             | 1,222 | 1,154                         | 1,295    |
| N de Casos Válidos                                                                  | 1310  |                               |          |

Type of residency program \* Race

### Crosstab

|                           |                         |                                | Race  |       |       |       | Total  |
|---------------------------|-------------------------|--------------------------------|-------|-------|-------|-------|--------|
|                           |                         |                                | White | Pardo | Black | Other |        |
| Type of residency program | Non-Medical (Other HCP) | Contagem                       | 338   | 237   | 54    | 10    | 639    |
|                           |                         | % em Type of residency program | 52,9% | 37,1% | 8,5%  | 1,6%  | 100,0% |
|                           |                         | % do Total                     | 25,7% | 18,1% | 4,1%  | 0,8%  | 48,7%  |
|                           | Medical                 | Contagem                       | 440   | 196   | 27    | 11    | 674    |
|                           |                         | % em Type of residency program | 65,3% | 29,1% | 4,0%  | 1,6%  | 100,0% |
|                           |                         | % do Total                     | 33,5% | 14,9% | 2,1%  | 0,8%  | 51,3%  |
|                           | Total                   | Contagem                       | 778   | 433   | 81    | 21    | 1313   |
|                           |                         | % em Type of residency program | 59,3% | 33,0% | 6,2%  | 1,6%  | 100,0% |
|                           |                         | % do Total                     | 59,3% | 33,0% | 6,2%  | 1,6%  | 100,0% |

### Testes qui-quadrado

|                              | Valor               | gl | Significância Assintótica (Bilateral) |
|------------------------------|---------------------|----|---------------------------------------|
| Qui-quadrado de Pearson      | 25,388 <sup>a</sup> | 3  | ,000                                  |
| Razão de verossimilhança     | 25,588              | 3  | ,000                                  |
| Associação Linear por Linear | 19,470              | 1  | ,000                                  |
| N de Casos Válidos           | 1313                |    |                                       |

a. 0 células (,0%) esperavam uma contagem menor que 5. A contagem mínima esperada é 10,22.

Medidas Simétricas

|                     |             | Valor | Significância Aproximada |
|---------------------|-------------|-------|--------------------------|
| Nominal por Nominal | Fi          | ,139  | ,000                     |
|                     | V de Cramer | ,139  | ,000                     |
| N de Casos Válidos  |             | 1313  |                          |

Estimativa de Risco

|                                                                                     | Valor |
|-------------------------------------------------------------------------------------|-------|
| Razão de Chances para Type of residency program (Non-Medical (Other HCP) / Medical) | a     |

a. Não é possível calcular as estatísticas de Estimativa de Risco. Elas são computadas apenas para uma tabela 2\*2 sem células vazias.

Type of residency program \* Any comorbidity (regardless COVID risk)

Crosstab

|                           |                                |                                | Any comorbidity (regardless COVID risk) |       |        |
|---------------------------|--------------------------------|--------------------------------|-----------------------------------------|-------|--------|
|                           |                                |                                | No                                      | Yes   | Total  |
| Type of residency program | Non-Medical (Other HCP)        | Contagem                       | 530                                     | 104   | 634    |
|                           |                                | % em Type of residency program | 83,6%                                   | 16,4% | 100,0% |
|                           |                                | % do Total                     | 40,6%                                   | 8,0%  | 48,6%  |
|                           | Medical                        | Contagem                       | 541                                     | 130   | 671    |
|                           |                                | % em Type of residency program | 80,6%                                   | 19,4% | 100,0% |
|                           |                                | % do Total                     | 41,5%                                   | 10,0% | 51,4%  |
| Total                     | Contagem                       |                                | 1071                                    | 234   | 1305   |
|                           | % em Type of residency program |                                | 82,1%                                   | 17,9% | 100,0% |
|                           | % do Total                     |                                | 82,1%                                   | 17,9% | 100,0% |

Testes qui-quadrado

|                         | Valor              | gl | Significância Assintótica (Bilateral) | Sig exata (2 lados) | Sig exata (1 lado) |
|-------------------------|--------------------|----|---------------------------------------|---------------------|--------------------|
| Qui-quadrado de Pearson | 1,954 <sup>a</sup> | 1  | ,162                                  |                     |                    |

|                                       |       |   |      |      |      |
|---------------------------------------|-------|---|------|------|------|
| Correção de continuidade <sup>b</sup> | 1,758 | 1 | ,185 |      |      |
| Razão de verossimilhança              | 1,959 | 1 | ,162 |      |      |
| Teste Exato de Fisher                 |       |   |      | ,171 | ,092 |
| Associação Linear por Linear          | 1,953 | 1 | ,162 |      |      |
| N de Casos Válidos                    | 1305  |   |      |      |      |

a. 0 células (,0%) esperavam uma contagem menor que 5. A contagem mínima esperada é 113,68.

b. Computado apenas para uma tabela 2x2

### Medidas Simétricas

|                     |             | Valor | Significância Aproximada |
|---------------------|-------------|-------|--------------------------|
| Nominal por Nominal | Fi          | ,039  | ,162                     |
|                     | V de Cramer | ,039  | ,162                     |
| N de Casos Válidos  |             | 1305  |                          |

### Estimativa de Risco

|                                                                                     | Valor | Intervalo de confiança de 95% |          |
|-------------------------------------------------------------------------------------|-------|-------------------------------|----------|
|                                                                                     |       | Inferior                      | Superior |
| Razão de Chances para Type of residency program (Non-Medical (Other HCP) / Medical) | 1,225 | ,922                          | 1,627    |
| Para grupo Any comorbidity (regardless COVID risk) = No                             | 1,037 | ,986                          | 1,091    |
| Para grupo Any comorbidity (regardless COVID risk) = Yes                            | ,847  | ,670                          | 1,070    |
| N de Casos Válidos                                                                  | 1305  |                               |          |

Type of residency program \* Risk factor(s) for severe COVID19

### Crosstab

|                           |                         |                                | Risk factor(s) for severe COVID19 |       |        |
|---------------------------|-------------------------|--------------------------------|-----------------------------------|-------|--------|
|                           |                         |                                | No                                | Yes   | Total  |
| Type of residency program | Non-Medical (Other HCP) | Contagem                       | 539                               | 95    | 634    |
|                           |                         | % em Type of residency program | 85,0%                             | 15,0% | 100,0% |
|                           |                         | % do Total                     | 41,3%                             | 7,3%  | 48,6%  |
|                           | Medical                 | Contagem                       | 548                               | 123   | 671    |
|                           |                         | % em Type of residency program | 81,7%                             | 18,3% | 100,0% |
|                           |                         | % do Total                     | 42,0%                             | 9,4%  | 51,4%  |
|                           | Total                   | Contagem                       | 1087                              | 218   | 1305   |
|                           |                         | % em Type of residency program | 83,3%                             | 16,7% | 100,0% |

| % do Total | 83,3% | 16,7% | 100,0% |
|------------|-------|-------|--------|
|------------|-------|-------|--------|

### Testes qui-quadrado

|                                       | Valor              | gl | Significância<br>Assintótica<br>(Bilateral) | Sig exata (2 lados) | Sig exata (1 lado) |
|---------------------------------------|--------------------|----|---------------------------------------------|---------------------|--------------------|
| Qui-quadrado de Pearson               | 2,624 <sup>a</sup> | 1  | ,105                                        |                     |                    |
| Correção de continuidade <sup>b</sup> | 2,389              | 1  | ,122                                        |                     |                    |
| Razão de verossimilhança              | 2,632              | 1  | ,105                                        |                     |                    |
| Teste Exato de Fisher                 |                    |    |                                             | ,119                | ,061               |
| Associação Linear por Linear          | 2,622              | 1  | ,105                                        |                     |                    |
| N de Casos Válidos                    | 1305               |    |                                             |                     |                    |

a. 0 células (,0%) esperavam uma contagem menor que 5. A contagem mínima esperada é 105,91.

b. Computado apenas para uma tabela 2x2

### Medidas Simétricas

|                     |             | Valor | Significância<br>Aproximada |
|---------------------|-------------|-------|-----------------------------|
| Nominal por Nominal | Fi          | ,045  | ,105                        |
|                     | V de Cramer | ,045  | ,105                        |
| N de Casos Válidos  |             | 1305  |                             |

### Estimativa de Risco

|                                                                                     | Valor | Intervalo de confiança de 95% |          |
|-------------------------------------------------------------------------------------|-------|-------------------------------|----------|
|                                                                                     |       | Inferior                      | Superior |
| Razão de Chances para Type of residency program (Non-Medical (Other HCP) / Medical) | 1,273 | ,950                          | 1,707    |
| Para grupo Risk factor(s) for severe COVID19 = No                                   | 1,041 | ,992                          | 1,093    |
| Para grupo Risk factor(s) for severe COVID19 = Yes                                  | ,817  | ,640                          | 1,044    |
| N de Casos Válidos                                                                  | 1305  |                               |          |

Type of residency program \* DASS21 Classification - Depression (dichotomous)

### Crosstab

DASS21 Classification - Depression  
(dichotomous)

Total

|                           |                         |                                | Normal | Abnormal (elevated) |        |
|---------------------------|-------------------------|--------------------------------|--------|---------------------|--------|
| Type of residency program | Non-Medical (Other HCP) | Contagem                       | 427    | 212                 | 639    |
|                           |                         | % em Type of residency program | 66,8%  | 33,2%               | 100,0% |
|                           |                         | % do Total                     | 32,5%  | 16,1%               | 48,7%  |
|                           | Medical                 | Contagem                       | 443    | 231                 | 674    |
|                           |                         | % em Type of residency program | 65,7%  | 34,3%               | 100,0% |
|                           |                         | % do Total                     | 33,7%  | 17,6%               | 51,3%  |
|                           | Total                   | Contagem                       | 870    | 443                 | 1313   |
|                           |                         | % em Type of residency program | 66,3%  | 33,7%               | 100,0% |
|                           |                         | % do Total                     | 66,3%  | 33,7%               | 100,0% |

### Testes qui-quadrado

|                                       | Valor             | gl | Significância Assintótica (Bilateral) | Sig exata (2 lados) | Sig exata (1 lado) |
|---------------------------------------|-------------------|----|---------------------------------------|---------------------|--------------------|
| Qui-quadrado de Pearson               | ,176 <sup>a</sup> | 1  | ,675                                  |                     |                    |
| Correção de continuidade <sup>b</sup> | ,131              | 1  | ,718                                  |                     |                    |
| Razão de verossimilhança              | ,176              | 1  | ,675                                  |                     |                    |
| Teste Exato de Fisher                 |                   |    |                                       | ,683                | ,359               |
| Associação Linear por Linear          | ,176              | 1  | ,675                                  |                     |                    |
| N de Casos Válidos                    | 1313              |    |                                       |                     |                    |

a. 0 células (,0%) esperavam uma contagem menor que 5. A contagem mínima esperada é 215,60.

b. Computado apenas para uma tabela 2x2

### Medidas Simétricas

|                     |             | Valor | Significância Aproximada |
|---------------------|-------------|-------|--------------------------|
| Nominal por Nominal | Fi          | ,012  | ,675                     |
|                     | V de Cramer | ,012  | ,675                     |
| N de Casos Válidos  |             | 1313  |                          |

### Estimativa de Risco

|                                                                                     | Valor | Intervalo de confiança de 95% |          |
|-------------------------------------------------------------------------------------|-------|-------------------------------|----------|
|                                                                                     |       | Inferior                      | Superior |
| Razão de Chances para Type of residency program (Non-Medical (Other HCP) / Medical) | 1,050 | ,835                          | 1,320    |
| Para grupo DASS21 Classification - Depression (dichotomous) = Normal                | 1,017 | ,941                          | 1,098    |
| Para grupo DASS21 Classification - Depression (dichotomous) = Abnormal (elevated)   | ,968  | ,832                          | 1,127    |

|                    |      |  |
|--------------------|------|--|
| N de Casos Válidos | 1313 |  |
|--------------------|------|--|

Type of residency program \* DASS21 Classification - Anxiety (dichotomous)

| Crosstab                  |                         |                                |                                 |                     |        |
|---------------------------|-------------------------|--------------------------------|---------------------------------|---------------------|--------|
|                           |                         |                                | DASS21 Classification - Anxiety |                     | Total  |
|                           |                         |                                | (dichotomous)                   |                     |        |
|                           |                         |                                | Normal                          | Abnormal (elevated) |        |
| Type of residency program | Non-Medical (Other HCP) | Contagem                       | 398                             | 241                 | 639    |
|                           |                         | % em Type of residency program | 62,3%                           | 37,7%               | 100,0% |
|                           |                         | % do Total                     | 30,3%                           | 18,4%               | 48,7%  |
|                           | Medical                 | Contagem                       | 463                             | 211                 | 674    |
|                           |                         | % em Type of residency program | 68,7%                           | 31,3%               | 100,0% |
|                           |                         | % do Total                     | 35,3%                           | 16,1%               | 51,3%  |
|                           | Total                   | Contagem                       | 861                             | 452                 | 1313   |
|                           |                         | % em Type of residency program | 65,6%                           | 34,4%               | 100,0% |
|                           |                         | % do Total                     | 65,6%                           | 34,4%               | 100,0% |

| Testes qui-quadrado                   |                    |    |                                       |                     |                    |
|---------------------------------------|--------------------|----|---------------------------------------|---------------------|--------------------|
|                                       | Valor              | gl | Significância Assintótica (Bilateral) | Sig exata (2 lados) | Sig exata (1 lado) |
| Qui-quadrado de Pearson               | 5,969 <sup>a</sup> | 1  | ,015                                  |                     |                    |
| Correção de continuidade <sup>b</sup> | 5,689              | 1  | ,017                                  |                     |                    |
| Razão de verossimilhança              | 5,971              | 1  | ,015                                  |                     |                    |
| Teste Exato de Fisher                 |                    |    |                                       | ,015                | ,009               |
| Associação Linear por Linear          | 5,965              | 1  | ,015                                  |                     |                    |
| N de Casos Válidos                    | 1313               |    |                                       |                     |                    |

a. 0 células (,0%) esperavam uma contagem menor que 5. A contagem mínima esperada é 219,98.

b. Computado apenas para uma tabela 2x2

| Medidas Simétricas  |             |       | Significância Aproximada |
|---------------------|-------------|-------|--------------------------|
|                     |             | Valor |                          |
| Nominal por Nominal | Fi          | -,067 | ,015                     |
|                     | V de Cramer | ,067  | ,015                     |
| N de Casos Válidos  |             | 1313  |                          |

## Estimativa de Risco

|                                                                                     | Valor | Intervalo de confiança de 95% |          |
|-------------------------------------------------------------------------------------|-------|-------------------------------|----------|
|                                                                                     |       | Inferior                      | Superior |
| Razão de Chances para Type of residency program (Non-Medical (Other HCP) / Medical) | ,753  | ,599                          | ,946     |
| Para grupo DASS21 Classification - Anxiety (dichotomous) = Normal                   | ,907  | ,838                          | ,981     |
| Para grupo DASS21 Classification - Anxiety (dichotomous) = Abnormal (elevated)      | 1,205 | 1,037                         | 1,399    |
| N de Casos Válidos                                                                  | 1313  |                               |          |

Type of residency program \* DASS21 Classification - Stress (dichotomous)

### Crosstab

|                           |                                |                                | DASS21 Classification - Stress (dichotomous) |                     | Total  |
|---------------------------|--------------------------------|--------------------------------|----------------------------------------------|---------------------|--------|
|                           |                                |                                | Normal                                       | Abnormal (elevated) |        |
| Type of residency program | Non-Medical (Other HCP)        | Contagem                       | 482                                          | 157                 | 639    |
|                           |                                | % em Type of residency program | 75,4%                                        | 24,6%               | 100,0% |
|                           |                                | % do Total                     | 36,7%                                        | 12,0%               | 48,7%  |
|                           | Medical                        | Contagem                       | 530                                          | 144                 | 674    |
|                           |                                | % em Type of residency program | 78,6%                                        | 21,4%               | 100,0% |
|                           |                                | % do Total                     | 40,4%                                        | 11,0%               | 51,3%  |
| Total                     | Contagem                       |                                | 1012                                         | 301                 | 1313   |
|                           | % em Type of residency program |                                | 77,1%                                        | 22,9%               | 100,0% |
|                           | % do Total                     |                                | 77,1%                                        | 22,9%               | 100,0% |

### Testes qui-quadrado

|                                       | Valor              | gl | Significância Assintótica (Bilateral) | Sig exata (2 lados) | Sig exata (1 lado) |
|---------------------------------------|--------------------|----|---------------------------------------|---------------------|--------------------|
| Qui-quadrado de Pearson               | 1,907 <sup>a</sup> | 1  | ,167                                  |                     |                    |
| Correção de continuidade <sup>b</sup> | 1,729              | 1  | ,188                                  |                     |                    |
| Razão de verossimilhança              | 1,906              | 1  | ,167                                  |                     |                    |
| Teste Exato de Fisher                 |                    |    |                                       | ,169                | ,094               |
| Associação Linear por Linear          | 1,905              | 1  | ,168                                  |                     |                    |
| N de Casos Válidos                    | 1313               |    |                                       |                     |                    |

a. 0 células (,0%) esperavam uma contagem menor que 5. A contagem mínima esperada é 146,49.

b. Computado apenas para uma tabela 2x2

### Medidas Simétricas

|                     |             | Valor | Significância Aproximada |
|---------------------|-------------|-------|--------------------------|
| Nominal por Nominal | Fi          | -,038 | ,167                     |
|                     | V de Cramer | ,038  | ,167                     |
| N de Casos Válidos  |             | 1313  |                          |

### Estimativa de Risco

|                                                                                     | Valor | Intervalo de confiança de 95% |          |
|-------------------------------------------------------------------------------------|-------|-------------------------------|----------|
|                                                                                     |       | Inferior                      | Superior |
| Razão de Chances para Type of residency program (Non-Medical (Other HCP) / Medical) | ,834  | ,645                          | 1,079    |
| Para grupo DASS21 Classification - Stress (dichotomous) = Normal                    | ,959  | ,904                          | 1,018    |
| Para grupo DASS21 Classification - Stress (dichotomous) = Abnormal (elevated)       | 1,150 | ,943                          | 1,403    |
| N de Casos Válidos                                                                  | 1313  |                               |          |

Type of residency program \* PHQ9 Depression Classification - Risk estimate for having current major depressive disorder

### Crosstab

|                           |                         |                                | PHQ9 Depression Classification - Risk estimate for having current major depressive disorder |       |        |        |
|---------------------------|-------------------------|--------------------------------|---------------------------------------------------------------------------------------------|-------|--------|--------|
|                           |                         |                                | Low                                                                                         | High  | Total  |        |
| Type of residency program | Non-Medical (Other HCP) | Contagem                       | 196                                                                                         | 443   | 639    |        |
|                           |                         | % em Type of residency program | 30,7%                                                                                       | 69,3% | 100,0% |        |
|                           |                         | % do Total                     | 14,9%                                                                                       | 33,7% | 48,7%  |        |
|                           | Medical                 | Contagem                       | 233                                                                                         | 441   | 674    |        |
|                           |                         | % em Type of residency program | 34,6%                                                                                       | 65,4% | 100,0% |        |
|                           |                         | % do Total                     | 17,7%                                                                                       | 33,6% | 51,3%  |        |
| Total                     |                         |                                | Contagem                                                                                    | 429   | 884    | 1313   |
|                           |                         |                                | % em Type of residency program                                                              | 32,7% | 67,3%  | 100,0% |
|                           |                         |                                | % do Total                                                                                  | 32.7% | 67.3%  | 100.0% |

### Testes qui-quadrado

|                                       | Valor              | gl | Significância<br>Assintótica<br>(Bilateral) | Sig exata (2 lados) | Sig exata (1 lado) |
|---------------------------------------|--------------------|----|---------------------------------------------|---------------------|--------------------|
| Qui-quadrado de Pearson               | 2,264 <sup>a</sup> | 1  | ,132                                        |                     |                    |
| Correção de continuidade <sup>b</sup> | 2,091              | 1  | ,148                                        |                     |                    |
| Razão de verossimilhança              | 2,267              | 1  | ,132                                        |                     |                    |
| Teste Exato de Fisher                 |                    |    |                                             | ,141                | ,074               |
| Associação Linear por Linear          | 2,263              | 1  | ,133                                        |                     |                    |
| N de Casos Válidos                    | 1313               |    |                                             |                     |                    |

a. 0 células (,0%) esperavam uma contagem menor que 5. A contagem mínima esperada é 208,78.

b. Computado apenas para uma tabela 2x2

### Medidas Simétricas

|                     |             | Valor | Significância<br>Aproximada |
|---------------------|-------------|-------|-----------------------------|
| Nominal por Nominal | Fi          | -,042 | ,132                        |
|                     | V de Cramer | ,042  | ,132                        |
| N de Casos Válidos  |             | 1313  |                             |

### Estimativa de Risco

|                                                                                                               | Valor | Intervalo de confiança de 95% |          |
|---------------------------------------------------------------------------------------------------------------|-------|-------------------------------|----------|
|                                                                                                               |       | Inferior                      | Superior |
| Razão de Chances para Type of residency program (Non-Medical (Other HCP) / Medical)                           | ,837  | ,665                          | 1,055    |
| Para grupo PHQ9 Depression Classification - Risk estimate for having current major depressive disorder = Low  | ,887  | ,759                          | 1,037    |
| Para grupo PHQ9 Depression Classification - Risk estimate for having current major depressive disorder = High | 1,060 | ,983                          | 1,142    |
| N de Casos Válidos                                                                                            | 1313  |                               |          |

Type of residency program \* BRCS Classification

### Crosstab

|                           |                         |          | BRCS Classification |                  |       |
|---------------------------|-------------------------|----------|---------------------|------------------|-------|
|                           |                         |          | Low resilience      | Moderate to High | Total |
| Type of residency program | Non-Medical (Other HCP) | Contagem | 414                 | 225              | 639   |

|       |         |                                |       |       |        |
|-------|---------|--------------------------------|-------|-------|--------|
|       |         | % em Type of residency program | 64,8% | 35,2% | 100,0% |
|       |         | % do Total                     | 31,5% | 17,1% | 48,7%  |
|       |         | Contagem                       | 399   | 275   | 674    |
|       | Medical | % em Type of residency program | 59,2% | 40,8% | 100,0% |
|       |         | % do Total                     | 30,4% | 20,9% | 51,3%  |
|       |         | Contagem                       | 813   | 500   | 1313   |
| Total |         | % em Type of residency program | 61,9% | 38,1% | 100,0% |
|       |         | % do Total                     | 61,9% | 38,1% | 100,0% |
|       |         | Contagem                       | 813   | 500   | 1313   |

### Testes qui-quadrado

|                                       | Valor              | gl | Significância<br>Assintótica<br>(Bilateral) | Sig exata (2 lados) | Sig exata (1 lado) |
|---------------------------------------|--------------------|----|---------------------------------------------|---------------------|--------------------|
| Qui-quadrado de Pearson               | 4,347 <sup>a</sup> | 1  | ,037                                        |                     |                    |
| Correção de continuidade <sup>b</sup> | 4,113              | 1  | ,043                                        |                     |                    |
| Razão de verossimilhança              | 4,352              | 1  | ,037                                        |                     |                    |
| Teste Exato de Fisher                 |                    |    |                                             | ,041                | ,021               |
| Associação Linear por Linear          | 4,344              | 1  | ,037                                        |                     |                    |
| N de Casos Válidos                    | 1313               |    |                                             |                     |                    |

a. 0 células (,0%) esperavam uma contagem menor que 5. A contagem mínima esperada é 243,34.

b. Computado apenas para uma tabela 2x2

### Medidas Simétricas

|                     |             | Valor | Significância<br>Aproximada |
|---------------------|-------------|-------|-----------------------------|
| Nominal por Nominal | Fi          | ,058  | ,037                        |
|                     | V de Cramer | ,058  | ,037                        |
| N de Casos Válidos  |             | 1313  |                             |

### Estimativa de Risco

|                                                                                     | Valor | Intervalo de confiança de 95% |          |
|-------------------------------------------------------------------------------------|-------|-------------------------------|----------|
|                                                                                     |       | Inferior                      | Superior |
| Razão de Chances para Type of residency program (Non-Medical (Other HCP) / Medical) | 1,268 | 1,014                         | 1,586    |
| Para grupo BRCS Classification = Low resilience                                     | 1,094 | 1,005                         | 1,191    |
| Para grupo BRCS Classification = Moderate to High                                   | ,863  | ,751                          | ,992     |
| N de Casos Válidos                                                                  | 1313  |                               |          |

Crosstab

|                           |                         |                                | OLBI Score Classification |       | Total  |
|---------------------------|-------------------------|--------------------------------|---------------------------|-------|--------|
|                           |                         |                                | Low to Moderate           | High  |        |
| Type of residency program | Non-Medical (Other HCP) | Contagem                       | 437                       | 202   | 639    |
|                           |                         | % em Type of residency program | 68,4%                     | 31,6% | 100,0% |
|                           |                         | % do Total                     | 33,3%                     | 15,4% | 48,7%  |
|                           | Medical                 | Contagem                       | 438                       | 236   | 674    |
|                           |                         | % em Type of residency program | 65,0%                     | 35,0% | 100,0% |
|                           |                         | % do Total                     | 33,4%                     | 18,0% | 51,3%  |
|                           | Total                   | Contagem                       | 875                       | 438   | 1313   |
|                           |                         | % em Type of residency program | 66,6%                     | 33,4% | 100,0% |
|                           |                         | % do Total                     | 66,6%                     | 33,4% | 100,0% |

Testes qui-quadrado

|                                       | Valor              | gl | Significância Assintótica (Bilateral) | Sig exata (2 lados) | Sig exata (1 lado) |
|---------------------------------------|--------------------|----|---------------------------------------|---------------------|--------------------|
| Qui-quadrado de Pearson               | 1,709 <sup>a</sup> | 1  | ,191                                  |                     |                    |
| Correção de continuidade <sup>b</sup> | 1,559              | 1  | ,212                                  |                     |                    |
| Razão de verossimilhança              | 1,710              | 1  | ,191                                  |                     |                    |
| Teste Exato de Fisher                 |                    |    |                                       | ,198                | ,106               |
| Associação Linear por Linear          | 1,707              | 1  | ,191                                  |                     |                    |
| N de Casos Válidos                    | 1313               |    |                                       |                     |                    |

a. 0 células (,0%) esperavam uma contagem menor que 5. A contagem mínima esperada é 213,16.

b. Computado apenas para uma tabela 2x2

Medidas Simétricas

|                     |             | Valor | Significância Aproximada |
|---------------------|-------------|-------|--------------------------|
| Nominal por Nominal | Fi          | ,036  | ,191                     |
|                     | V de Cramer | ,036  | ,191                     |
| N de Casos Válidos  |             | 1313  |                          |

Estimativa de Risco

| Valor | Intervalo de confiança de 95% |
|-------|-------------------------------|
|-------|-------------------------------|

|                                                                                     |       | Inferior | Superior |
|-------------------------------------------------------------------------------------|-------|----------|----------|
| Razão de Chances para Type of residency program (Non-Medical (Other HCP) / Medical) | 1,166 | ,926     | 1,467    |
| Para grupo OLBI Score Classification = Low to Moderate                              | 1,052 | ,975     | 1,136    |
| Para grupo OLBI Score Classification = High                                         | ,903  | ,774     | 1,053    |
| N de Casos Válidos                                                                  | 1313  |          |          |

Type of residency program \* Classification of the percieved autonomy to self-conduct in the residency program

### Crosstab

|                           |                         |                                | Classification of the percieved autonomy to self-conduct in the residency program |                           |        |
|---------------------------|-------------------------|--------------------------------|-----------------------------------------------------------------------------------|---------------------------|--------|
|                           |                         |                                | Low autonomy                                                                      | Moderate to high autonomy | Total  |
| Type of residency program | Non-Medical (Other HCP) | Contagem                       | 104                                                                               | 535                       | 639    |
|                           |                         | % em Type of residency program | 16,3%                                                                             | 83,7%                     | 100,0% |
|                           |                         | % do Total                     | 7,9%                                                                              | 40,7%                     | 48,7%  |
|                           | Medical                 | Contagem                       | 120                                                                               | 554                       | 674    |
|                           |                         | % em Type of residency program | 17,8%                                                                             | 82,2%                     | 100,0% |
|                           |                         | % do Total                     | 9,1%                                                                              | 42,2%                     | 51,3%  |
|                           | Total                   | Contagem                       | 224                                                                               | 1089                      | 1313   |
|                           |                         | % em Type of residency program | 17,1%                                                                             | 82,9%                     | 100,0% |
|                           |                         | % do Total                     | 17,1%                                                                             | 82,9%                     | 100,0% |

### Testes qui-quadrado

|                                       | Valor             | gl | Significância Assintótica (Bilateral) | Sig exata (2 lados) | Sig exata (1 lado) |
|---------------------------------------|-------------------|----|---------------------------------------|---------------------|--------------------|
| Qui-quadrado de Pearson               | ,542 <sup>a</sup> | 1  | ,462                                  |                     |                    |
| Correção de continuidade <sup>b</sup> | ,439              | 1  | ,508                                  |                     |                    |
| Razão de verossimilhança              | ,542              | 1  | ,461                                  |                     |                    |
| Teste Exato de Fisher                 |                   |    |                                       | ,464                | ,254               |
| Associação Linear por Linear          | ,541              | 1  | ,462                                  |                     |                    |
| N de Casos Válidos                    | 1313              |    |                                       |                     |                    |

a. 0 células (,0%) esperavam uma contagem menor que 5. A contagem mínima esperada é 109,01.

b. Computado apenas para uma tabela 2x2

## Medidas Simétricas

|                     |             | Valor | Significância Aproximada |
|---------------------|-------------|-------|--------------------------|
| Nominal por Nominal | Fi          | -,020 | ,462                     |
|                     | V de Cramer | ,020  | ,462                     |
| N de Casos Válidos  |             | 1313  |                          |

## Estimativa de Risco

|                                                                                                                          | Valor | Intervalo de confiança de 95% |          |
|--------------------------------------------------------------------------------------------------------------------------|-------|-------------------------------|----------|
|                                                                                                                          |       | Inferior                      | Superior |
| Razão de Chances para Type of residency program (Non-Medical (Other HCP) / Medical)                                      | ,897  | ,673                          | 1,197    |
| Para grupo Classification of the percieved autonomy to self-conduct in the residency program = Low autonomy              | ,914  | ,720                          | 1,161    |
| Para grupo Classification of the percieved autonomy to self-conduct in the residency program = Moderate to high autonomy | 1,019 | ,970                          | 1,070    |
| N de Casos Válidos                                                                                                       | 1313  |                               |          |

Type of residency program \* Percieved adequacy of the pedagogic structure and availability of resouces in the residency program

## Crosstab

|                           |                         |                                | Percieved adequacy of the pedagogic structure and availability of resouces in the residency program |                           |        |
|---------------------------|-------------------------|--------------------------------|-----------------------------------------------------------------------------------------------------|---------------------------|--------|
|                           |                         |                                | Poor adequacy                                                                                       | Moderate to good adequacy | Total  |
| Type of residency program | Non-Medical (Other HCP) | Contagem                       | 327                                                                                                 | 312                       | 639    |
|                           |                         | % em Type of residency program | 51,2%                                                                                               | 48,8%                     | 100,0% |
|                           |                         | % do Total                     | 24,9%                                                                                               | 23,8%                     | 48,7%  |
|                           | Medical                 | Contagem                       | 231                                                                                                 | 443                       | 674    |
|                           |                         | % em Type of residency program | 34,3%                                                                                               | 65,7%                     | 100,0% |
|                           |                         | % do Total                     | 17,6%                                                                                               | 33,7%                     | 51,3%  |
|                           |                         | Total                          | Contagem                                                                                            | 558                       | 755    |
|                           |                         | % em Type of residency program | 42,5%                                                                                               | 57,5%                     | 100,0% |
|                           |                         | % do Total                     | 42.5%                                                                                               | 57.5%                     | 100.0% |

### Testes qui-quadrado

|                                       | Valor               | gl | Significância<br>Assintótica<br>(Bilateral) | Sig exata (2 lados) | Sig exata (1 lado) |
|---------------------------------------|---------------------|----|---------------------------------------------|---------------------|--------------------|
| Qui-quadrado de Pearson               | 38,340 <sup>a</sup> | 1  | ,000                                        |                     |                    |
| Correção de continuidade <sup>b</sup> | 37,652              | 1  | ,000                                        |                     |                    |
| Razão de verossimilhança              | 38,511              | 1  | ,000                                        |                     |                    |
| Teste Exato de Fisher                 |                     |    |                                             | ,000                | ,000               |
| Associação Linear por Linear          | 38,311              | 1  | ,000                                        |                     |                    |
| N de Casos Válidos                    | 1313                |    |                                             |                     |                    |

a. 0 células (,0%) esperavam uma contagem menor que 5. A contagem mínima esperada é 271,56.

b. Computado apenas para uma tabela 2x2

### Medidas Simétricas

|                     |             | Valor | Significância<br>Aproximada |
|---------------------|-------------|-------|-----------------------------|
| Nominal por Nominal | Fi          | ,171  | ,000                        |
|                     | V de Cramer | ,171  | ,000                        |
| N de Casos Válidos  |             | 1313  |                             |

### Estimativa de Risco

|                                                                                                                                            | Valor | Intervalo de confiança de 95% |          |
|--------------------------------------------------------------------------------------------------------------------------------------------|-------|-------------------------------|----------|
|                                                                                                                                            |       | Inferior                      | Superior |
| Razão de Chances para Type of residency program (Non-Medical (Other HCP) / Medical)                                                        | 2,010 | 1,610                         | 2,510    |
| Para grupo Percieved adequacy of the pedagogic structure and availability of resouces in the residency program = Poor adequacy             | 1,493 | 1,312                         | 1,699    |
| Para grupo Percieved adequacy of the pedagogic structure and availability of resouces in the residency program = Moderate to good adequacy | ,743  | ,675                          | ,818     |
| N de Casos Válidos                                                                                                                         | 1313  |                               |          |

Type of residency program \* Perceived adequacy of the availability of personal protective equipment, when providing care for patients in the residency program

### Crosstab

|                           |                                |                                | Perceived adequacy of the availability of<br>personal protective equipment, when<br>providing care for patients in the residency<br>program |               |        |
|---------------------------|--------------------------------|--------------------------------|---------------------------------------------------------------------------------------------------------------------------------------------|---------------|--------|
|                           |                                |                                | Poor adequacy                                                                                                                               | Good adequacy | Total  |
| Type of residency program | Non-Medical (Other HCP)        | Contagem                       | 124                                                                                                                                         | 515           | 639    |
|                           |                                | % em Type of residency program | 19,4%                                                                                                                                       | 80,6%         | 100,0% |
|                           |                                | % do Total                     | 9,4%                                                                                                                                        | 39,2%         | 48,7%  |
|                           | Medical                        | Contagem                       | 157                                                                                                                                         | 517           | 674    |
|                           |                                | % em Type of residency program | 23,3%                                                                                                                                       | 76,7%         | 100,0% |
|                           |                                | % do Total                     | 12,0%                                                                                                                                       | 39,4%         | 51,3%  |
| Total                     | Contagem                       | 281                            | 1032                                                                                                                                        | 1313          |        |
|                           | % em Type of residency program | 21,4%                          | 78,6%                                                                                                                                       | 100,0%        |        |
|                           | % do Total                     | 21,4%                          | 78,6%                                                                                                                                       | 100,0%        |        |

### Testes qui-quadrado

|                                       | Valor              | gl | Significância<br>Assintótica<br>(Bilateral) | Sig exata (2 lados) | Sig exata (1 lado) |
|---------------------------------------|--------------------|----|---------------------------------------------|---------------------|--------------------|
| Qui-quadrado de Pearson               | 2,948 <sup>a</sup> | 1  | ,086                                        |                     |                    |
| Correção de continuidade <sup>b</sup> | 2,722              | 1  | ,099                                        |                     |                    |
| Razão de verossimilhança              | 2,955              | 1  | ,086                                        |                     |                    |
| Teste Exato de Fisher                 |                    |    |                                             | ,092                | ,049               |
| Associação Linear por Linear          | 2,946              | 1  | ,086                                        |                     |                    |
| N de Casos Válidos                    | 1313               |    |                                             |                     |                    |

a. 0 células (,0%) esperavam uma contagem menor que 5. A contagem mínima esperada é 136,75.

b. Computado apenas para uma tabela 2x2

### Medidas Simétricas

|                     |             | Valor | Significância<br>Aproximada |
|---------------------|-------------|-------|-----------------------------|
| Nominal por Nominal | Fi          | -,047 | ,086                        |
|                     | V de Cramer | ,047  | ,086                        |
| N de Casos Válidos  |             | 1313  |                             |

### Estimativa de Risco

| Valor | Intervalo de confiança de 95% |          |
|-------|-------------------------------|----------|
|       | Inferior                      | Superior |

|                                                                                                                                                               |       |      |       |
|---------------------------------------------------------------------------------------------------------------------------------------------------------------|-------|------|-------|
| Razão de Chances para Type of residency program (Non-Medical (Other HCP) / Medical)                                                                           | ,793  | ,608 | 1,034 |
| Para grupo Perceived adequacy of the availability of personal protective equipment, when providing care for patients in the residency program = Poor adequacy | ,833  | ,676 | 1,027 |
| Para grupo Perceived adequacy of the availability of personal protective equipment, when providing care for patients in the residency program = Good adequacy | 1,051 | ,993 | 1,112 |
| N de Casos Válidos                                                                                                                                            | 1313  |      |       |

Type of residency program \* The participant exerts professional activity external to the residency program

#### Crosstab

|                           |                         |                                | The participant exerts professional activity<br>external to the residency program |       |        |        |
|---------------------------|-------------------------|--------------------------------|-----------------------------------------------------------------------------------|-------|--------|--------|
|                           |                         |                                | No                                                                                | Yes   | Total  |        |
| Type of residency program | Non-Medical (Other HCP) | Contagem                       | 631                                                                               | 8     | 639    |        |
|                           |                         | % em Type of residency program | 98,7%                                                                             | 1,3%  | 100,0% |        |
|                           |                         | % do Total                     | 48,1%                                                                             | 0,6%  | 48,7%  |        |
|                           | Medical                 | Contagem                       | 258                                                                               | 416   | 674    |        |
|                           |                         | % em Type of residency program | 38,3%                                                                             | 61,7% | 100,0% |        |
|                           |                         | % do Total                     | 19,6%                                                                             | 31,7% | 51,3%  |        |
| Total                     |                         |                                | Contagem                                                                          | 889   | 424    | 1313   |
|                           |                         |                                | % em Type of residency program                                                    | 67,7% | 32,3%  | 100,0% |
|                           |                         |                                | % do Total                                                                        | 67,7% | 32,3%  | 100,0% |

#### Testes qui-quadrado

|                                       | Valor                | gl | Significância Assintótica (Bilateral) | Sig exata (2 lados) | Sig exata (1 lado) |
|---------------------------------------|----------------------|----|---------------------------------------|---------------------|--------------------|
| Qui-quadrado de Pearson               | 548,561 <sup>a</sup> | 1  | ,000                                  |                     |                    |
| Correção de continuidade <sup>b</sup> | 545,799              | 1  | ,000                                  |                     |                    |
| Razão de verossimilhança              | 668,933              | 1  | ,000                                  |                     |                    |
| Teste Exato de Fisher                 |                      |    |                                       | ,000                | ,000               |
| Associação Linear por Linear          | 548,143              | 1  | ,000                                  |                     |                    |

|                    |      |  |  |  |
|--------------------|------|--|--|--|
| N de Casos Válidos | 1313 |  |  |  |
|--------------------|------|--|--|--|

a. 0 células (,0%) esperavam uma contagem menor que 5. A contagem mínima esperada é 206,35.

b. Computado apenas para uma tabela 2x2

### Medidas Simétricas

|                     |             | Valor | Significância Aproximada |
|---------------------|-------------|-------|--------------------------|
| Nominal por Nominal | Fi          | ,646  | ,000                     |
|                     | V de Cramer | ,646  | ,000                     |
| N de Casos Válidos  |             | 1313  |                          |

### Estimativa de Risco

|                                                                                                 | Valor   | Intervalo de confiança de 95% |          |
|-------------------------------------------------------------------------------------------------|---------|-------------------------------|----------|
|                                                                                                 |         | Inferior                      | Superior |
| Razão de Chances para Type of residency program (Non-Medical (Other HCP) / Medical)             | 127,178 | 62,251                        | 259,825  |
| Para grupo The participant exerts professional activity external to the residency program = No  | 2,580   | 2,343                         | 2,840    |
| Para grupo The participant exerts professional activity external to the residency program = Yes | ,020    | ,010                          | ,040     |
| N de Casos Válidos                                                                              | 1313    |                               |          |

Type of residency program \* The participant provides direct health care for COVID19 patients

### Crosstab

|                           |                         |                                | The participant provides direct health care<br>for COVID19 patients |       |        |
|---------------------------|-------------------------|--------------------------------|---------------------------------------------------------------------|-------|--------|
|                           |                         |                                | No                                                                  | Yes   | Total  |
| Type of residency program | Non-Medical (Other HCP) | Contagem                       | 393                                                                 | 246   | 639    |
|                           |                         | % em Type of residency program | 61,5%                                                               | 38,5% | 100,0% |
|                           |                         | % do Total                     | 29,9%                                                               | 18,7% | 48,7%  |
|                           | Medical                 | Contagem                       | 130                                                                 | 544   | 674    |
|                           |                         | % em Type of residency program | 19,3%                                                               | 80,7% | 100,0% |
|                           |                         | % do Total                     | 9,9%                                                                | 41,4% | 51,3%  |
|                           | Total                   | Contagem                       | 523                                                                 | 790   | 1313   |
|                           |                         | % em Type of residency program | 39,8%                                                               | 60,2% | 100,0% |
|                           |                         | % do Total                     | 39,8%                                                               | 60,2% | 100,0% |

### Testes qui-quadrado

|                                       | Valor                | gl | Significância<br>Assintótica<br>(Bilateral) | Sig exata (2 lados) | Sig exata (1 lado) |
|---------------------------------------|----------------------|----|---------------------------------------------|---------------------|--------------------|
| Qui-quadrado de Pearson               | 243,905 <sup>a</sup> | 1  | ,000                                        |                     |                    |
| Correção de continuidade <sup>b</sup> | 242,147              | 1  | ,000                                        |                     |                    |
| Razão de verossimilhança              | 252,790              | 1  | ,000                                        |                     |                    |
| Teste Exato de Fisher                 |                      |    |                                             | ,000                | ,000               |
| Associação Linear por Linear          | 243,719              | 1  | ,000                                        |                     |                    |
| N de Casos Válidos                    | 1313                 |    |                                             |                     |                    |

a. 0 células (,0%) esperavam uma contagem menor que 5. A contagem mínima esperada é 254,53.

b. Computado apenas para uma tabela 2x2

### Medidas Simétricas

|                     |             | Valor | Significância<br>Aproximada |
|---------------------|-------------|-------|-----------------------------|
| Nominal por Nominal | Fi          | ,431  | ,000                        |
|                     | V de Cramer | ,431  | ,000                        |
| N de Casos Válidos  |             | 1313  |                             |

### Estimativa de Risco

|                                                                                     | Valor | Intervalo de confiança de 95% |          |
|-------------------------------------------------------------------------------------|-------|-------------------------------|----------|
|                                                                                     |       | Inferior                      | Superior |
| Razão de Chances para Type of residency program (Non-Medical (Other HCP) / Medical) | 6,685 | 5,212                         | 8,575    |
| Para grupo The participant provides direct health care for COVID19 patients = No    | 3,189 | 2,700                         | 3,765    |
| Para grupo The participant provides direct health care for COVID19 patients = Yes   | ,477  | ,430                          | ,530     |
| N de Casos Válidos                                                                  | 1313  |                               |          |

Type of residency program \* Cumulative weekly workload (five categories)

Crosstab

Cumulative weekly workload (five categories)

Total

|                           |                         |                                | ≤ 24h | >24h ≤ 60h | >60h ≤ 90h | >90h ≤ 120h | >120h |        |
|---------------------------|-------------------------|--------------------------------|-------|------------|------------|-------------|-------|--------|
| Type of residency program | Non-Medical (Other HCP) | Contagem                       | 8     | 337        | 292        | 2           | 0     | 639    |
|                           |                         | % em Type of residency program | 1,3%  | 52,7%      | 45,7%      | 0,3%        | 0,0%  | 100,0% |
|                           |                         | % do Total                     | 0,6%  | 25,7%      | 22,2%      | 0,2%        | 0,0%  | 48,7%  |
|                           | Medical                 | Contagem                       | 3     | 193        | 390        | 79          | 9     | 674    |
|                           |                         | % em Type of residency program | 0,4%  | 28,6%      | 57,9%      | 11,7%       | 1,3%  | 100,0% |
|                           |                         | % do Total                     | 0,2%  | 14,7%      | 29,7%      | 6,0%        | 0,7%  | 51,3%  |
|                           | Total                   | Contagem                       | 11    | 530        | 682        | 81          | 9     | 1313   |
|                           |                         | % em Type of residency program | 0,8%  | 40,4%      | 51,9%      | 6,2%        | 0,7%  | 100,0% |
|                           |                         | % do Total                     | 0,8%  | 40,4%      | 51,9%      | 6,2%        | 0,7%  | 100,0% |

### Testes qui-quadrado

|                              | Valor                | gl | Significância Assintótica (Bilateral) |
|------------------------------|----------------------|----|---------------------------------------|
| Qui-quadrado de Pearson      | 136,841 <sup>a</sup> | 4  | ,000                                  |
| Razão de verossimilhança     | 161,188              | 4  | ,000                                  |
| Associação Linear por Linear | 127,465              | 1  | ,000                                  |
| N de Casos Válidos           | 1313                 |    |                                       |

a. 2 células (20,0%) esperavam uma contagem menor que 5. A contagem mínima esperada é 4,38.

### Medidas Simétricas

|                     |             | Valor | Significância Aproximada |
|---------------------|-------------|-------|--------------------------|
| Nominal por Nominal | Fi          | ,323  | ,000                     |
|                     | V de Cramer | ,323  | ,000                     |
| N de Casos Válidos  |             | 1313  |                          |

### Estimativa de Risco

|                                                                                     | Valor        |
|-------------------------------------------------------------------------------------|--------------|
| Razão de Chances para Type of residency program (Non-Medical (Other HCP) / Medical) | <sup>a</sup> |

a. Não é possível calcular as estatísticas de Estimativa de Risco. Elas são computadas apenas para uma tabela 2\*2 sem células vazias.

### Observações

|                             |                                             |                                                                                                                                                            |
|-----------------------------|---------------------------------------------|------------------------------------------------------------------------------------------------------------------------------------------------------------|
| Saída criada                |                                             | 20-SEP-2020 12:04:57                                                                                                                                       |
| Comentários                 |                                             |                                                                                                                                                            |
| Entrada                     | Dados                                       | C:\Users\User\Documents\Pesquisa\Fellow\FellowGenData_V1.sav                                                                                               |
|                             | Conjunto de dados ativo                     | ConjuntodeDados1                                                                                                                                           |
|                             | Filtro                                      | <none>                                                                                                                                                     |
|                             | Ponderação                                  | <none>                                                                                                                                                     |
|                             | Arquivo Dividido                            | <none>                                                                                                                                                     |
|                             | N de linhas em arquivo de dados de trabalho | 1313                                                                                                                                                       |
| Tratamento de valor omissos | Definição de omissos                        | Os valores omissos definidos pelo usuário são tratados como omissos.                                                                                       |
|                             | Casos utilizados                            | As estatísticas de cada tabela são baseadas em todos os casos com dados válidos na(s) amplitude(s) especificada(s) para todas as variáveis de cada tabela. |
| Sintaxe                     |                                             | CROSSTABS<br>/TABLES=RsPrgType BY<br>Wkload_6060<br>/FORMAT=AVALUE TABLES<br>/STATISTICS=CHISQ PHI RISK<br>/CELLS=COUNT ROW TOTAL<br>/COUNT ROUND CELL.    |
| Recursos                    | Tempo do processador                        | 00:00:00,00                                                                                                                                                |
|                             | Tempo decorrido                             | 00:00:00,00                                                                                                                                                |
|                             | Dimensões solicitadas                       | 2                                                                                                                                                          |
|                             | Células disponíveis                         | 524245                                                                                                                                                     |

### Tabulação cruzada Type of residency program \* Cumulative weekly workload < or >= 60h (dichotomous)

|                           |                         |                                | Cumulative weekly workload < or >= 60h<br>(dichotomous) |       |        |
|---------------------------|-------------------------|--------------------------------|---------------------------------------------------------|-------|--------|
|                           |                         |                                | <=60h                                                   | >60h  | Total  |
| Type of residency program | Non-Medical (Other HCP) | Contagem                       | 345                                                     | 294   | 639    |
|                           |                         | % em Type of residency program | 54,0%                                                   | 46,0% | 100,0% |
|                           |                         | % do Total                     | 26,3%                                                   | 22,4% | 48,7%  |
|                           | Medical                 | Contagem                       | 196                                                     | 478   | 674    |
|                           |                         | % em Type of residency program | 29,1%                                                   | 70,9% | 100,0% |
|                           |                         | % do Total                     | 14,9%                                                   | 36,4% | 51,3%  |
|                           |                         | Total                          | Contagem                                                | 541   | 772    |

|                                |       |       |        |
|--------------------------------|-------|-------|--------|
| % em Type of residency program | 41,2% | 58,8% | 100,0% |
| % do Total                     | 41,2% | 58,8% | 100,0% |

### Testes qui-quadrado

|                                       | Valor               | gl | Significância Assintótica (Bilateral) | Sig exata (2 lados) | Sig exata (1 lado) |
|---------------------------------------|---------------------|----|---------------------------------------|---------------------|--------------------|
| Qui-quadrado de Pearson               | 84,019 <sup>a</sup> | 1  | ,000                                  |                     |                    |
| Correção de continuidade <sup>b</sup> | 82,994              | 1  | ,000                                  |                     |                    |
| Razão de verossimilhança              | 84,919              | 1  | ,000                                  |                     |                    |
| Teste Exato de Fisher                 |                     |    |                                       | ,000                | ,000               |
| Associação Linear por Linear          | 83,955              | 1  | ,000                                  |                     |                    |
| N de Casos Válidos                    | 1313                |    |                                       |                     |                    |

a. 0 células (,0%) esperavam uma contagem menor que 5. A contagem mínima esperada é 263,29.

b. Computado apenas para uma tabela 2x2

### Medidas Simétricas

|                     |             | Valor | Significância Aproximada |
|---------------------|-------------|-------|--------------------------|
| Nominal por Nominal | Fi          | ,253  | ,000                     |
|                     | V de Cramer | ,253  | ,000                     |
| N de Casos Válidos  |             | 1313  |                          |

### Estimativa de Risco

|                                                                                     | Valor | Intervalo de confiança de 95% |          |
|-------------------------------------------------------------------------------------|-------|-------------------------------|----------|
|                                                                                     |       | Inferior                      | Superior |
| Razão de Chances para Type of residency program (Non-Medical (Other HCP) / Medical) | 2,862 | 2,279                         | 3,594    |
| Para grupo Cumulative weekly workload < or >= 60h (dichotomous) = <=60h             | 1,857 | 1,617                         | 2,131    |
| Para grupo Cumulative weekly workload < or >= 60h (dichotomous) = >60h              | ,649  | ,589                          | ,715     |
| N de Casos Válidos                                                                  | 1313  |                               |          |

EXAMINE VARIABLES=Age DASS21\_D DASS21\_A DASS21\_S PHQ9\_Score BRCS\_Score OLBI\_D OLBI\_E OLBI\_Total

```
Autonomy PedagStruct BY RsPrgType
/PLOT BOXPLOT HISTOGRAM NPLOT
/COMPARE GROUPS
/PERCENTILES(5,10,25,50,75,90,95) HAVERAGE
/STATISTICS DESCRIPTIVES
/CINTERVAL 95
```

/MISSING PAIRWISE  
/NOTOTAL.

Explorar

### Observações

|                             |                                             |                                                                                                                                                                                                                                                                                                                                             |
|-----------------------------|---------------------------------------------|---------------------------------------------------------------------------------------------------------------------------------------------------------------------------------------------------------------------------------------------------------------------------------------------------------------------------------------------|
| Saída criada                |                                             | 20-SEP-2020 12:10:04                                                                                                                                                                                                                                                                                                                        |
| Comentários                 |                                             |                                                                                                                                                                                                                                                                                                                                             |
| Entrada                     | Dados                                       | C:\Users\User\Documents\Pesquisa\Fellow\FellowGenData_V1.sav                                                                                                                                                                                                                                                                                |
|                             | Conjunto de dados ativo                     | ConjuntodeDados1                                                                                                                                                                                                                                                                                                                            |
|                             | Filtro                                      | <none>                                                                                                                                                                                                                                                                                                                                      |
|                             | Ponderação                                  | <none>                                                                                                                                                                                                                                                                                                                                      |
|                             | Arquivo Dividido                            | <none>                                                                                                                                                                                                                                                                                                                                      |
|                             | N de linhas em arquivo de dados de trabalho | 1313                                                                                                                                                                                                                                                                                                                                        |
|                             |                                             |                                                                                                                                                                                                                                                                                                                                             |
| Tratamento de valor omissos | Definição de omissos                        | Os valores omissos definidos pelo usuário para variáveis dependentes são tratados como omissos.                                                                                                                                                                                                                                             |
|                             | Casos utilizados                            | As estatísticas são baseadas em casos sem valores omissos para a variável dependente ou fatores que estão sendo analisados.                                                                                                                                                                                                                 |
| Sintaxe                     |                                             | EXAMINE VARIABLES=Age<br>DASS21_D DASS21_A DASS21_S<br>PHQ9_Score BRCS_Score<br>OLBI_D OLBI_E OLBI_Total<br>Autonomy PedagStruct BY<br>RsPrgType<br>/PLOT BOXPLOT HISTOGRAM<br>NPLOT<br>/COMPARE GROUPS<br><br>/PERCENTILES(5,10,25,50,75,90,<br>95) HAVERAGE<br>/STATISTICS DESCRIPTIVES<br>/INTERVAL 95<br>/MISSING PAIRWISE<br>/NOTOTAL. |
| Recursos                    | Tempo do processador                        | 00:00:13,33                                                                                                                                                                                                                                                                                                                                 |
|                             | Tempo decorrido                             | 00:00:10,91                                                                                                                                                                                                                                                                                                                                 |

Type of residency program

|                         |                           | Descritivos                |                 |           |
|-------------------------|---------------------------|----------------------------|-----------------|-----------|
|                         | Type of residency program |                            | Estatística     | Erro Erro |
| Age                     | Non-Medical (Other HCP)   | Média                      | 26,44           | ,180      |
|                         |                           | 95% Intervalo de Confiança | Limite inferior | 26,09     |
|                         |                           | para Média                 | Limite superior | 26,79     |
|                         |                           | 5% da média aparada        |                 | 25,90     |
|                         |                           | Mediana                    |                 | 25,00     |
|                         |                           | Variância                  |                 | 19,417    |
|                         |                           | Erro Desvio                |                 | 4,407     |
|                         |                           | Mínimo                     |                 | 20        |
|                         |                           | Máximo                     |                 | 55        |
|                         |                           | Intervalo                  |                 | 35        |
|                         |                           | Amplitude interquartil     |                 | 3         |
|                         |                           | Assimetria                 |                 | 2,651     |
|                         |                           | Curtose                    |                 | 9,829     |
|                         | Medical                   | Média                      | 29,21           | ,158      |
|                         |                           | 95% Intervalo de Confiança | Limite inferior | 28,90     |
|                         |                           | para Média                 | Limite superior | 29,52     |
|                         |                           | 5% da média aparada        |                 | 28,85     |
|                         |                           | Mediana                    |                 | 28,00     |
|                         |                           | Variância                  |                 | 15,749    |
|                         |                           | Erro Desvio                |                 | 3,968     |
|                         |                           | Mínimo                     |                 | 23        |
|                         |                           | Máximo                     |                 | 61        |
|                         |                           | Intervalo                  |                 | 38        |
|                         |                           | Amplitude interquartil     |                 | 4         |
|                         |                           | Assimetria                 |                 | 2,545     |
|                         |                           | Curtose                    |                 | 13,368    |
| DASS21 Depression Score | Non-Medical (Other HCP)   | Média                      | 7,64            | ,216      |
|                         |                           | 95% Intervalo de Confiança | Limite inferior | 7,22      |
|                         |                           | para Média                 | Limite superior | 8,07      |
|                         |                           | 5% da média aparada        |                 | 7,39      |
|                         |                           | Mediana                    |                 | 7,00      |
|                         |                           | Variância                  |                 | 29,853    |
|                         |                           | Erro Desvio                |                 | 5,464     |
|                         |                           | Mínimo                     |                 | 0         |
|                         |                           | Máximo                     |                 | 21        |
|                         |                           | Intervalo                  |                 | 21        |
|                         |                           | Amplitude interquartil     |                 | 8         |
|                         |                           | Assimetria                 |                 | ,615      |
|                         |                           |                            |                 | ,097      |

|                      |                         |                            |                 |        |      |
|----------------------|-------------------------|----------------------------|-----------------|--------|------|
|                      | Medical                 | Curtose                    |                 | -,447  | ,193 |
|                      |                         | Média                      |                 | 7,64   | ,225 |
|                      |                         | 95% Intervalo de Confiança | Limite inferior | 7,20   |      |
|                      |                         | para Média                 | Limite superior | 8,08   |      |
|                      |                         | 5% da média aparada        |                 | 7,36   |      |
|                      |                         | Mediana                    |                 | 7,00   |      |
|                      |                         | Variância                  |                 | 34,053 |      |
|                      |                         | Erro Desvio                |                 | 5,835  |      |
|                      |                         | Mínimo                     |                 | 0      |      |
|                      |                         | Máximo                     |                 | 21     |      |
|                      |                         | Intervalo                  |                 | 21     |      |
|                      |                         | Amplitude interquartil     |                 | 8      |      |
|                      |                         | Assimetria                 |                 | ,608   | ,094 |
|                      |                         | Curtose                    |                 | -,587  | ,188 |
| DASS21 Anxiety Score | Non-Medical (Other HCP) | Média                      |                 | 6,61   | ,208 |
|                      |                         | 95% Intervalo de Confiança | Limite inferior | 6,20   |      |
|                      |                         | para Média                 | Limite superior | 7,02   |      |
|                      |                         | 5% da média aparada        |                 | 6,29   |      |
|                      |                         | Mediana                    |                 | 6,00   |      |
|                      |                         | Variância                  |                 | 27,614 |      |
|                      |                         | Erro Desvio                |                 | 5,255  |      |
|                      |                         | Mínimo                     |                 | 0      |      |
|                      |                         | Máximo                     |                 | 21     |      |
|                      |                         | Intervalo                  |                 | 21     |      |
|                      |                         | Amplitude interquartil     |                 | 8      |      |
|                      |                         | Assimetria                 |                 | ,734   | ,097 |
|                      |                         | Curtose                    |                 | -,236  | ,193 |
|                      | Medical                 | Média                      |                 | 5,48   | ,193 |
|                      |                         | 95% Intervalo de Confiança | Limite inferior | 5,10   |      |
|                      |                         | para Média                 | Limite superior | 5,86   |      |
|                      |                         | 5% da média aparada        |                 | 5,08   |      |
|                      |                         | Mediana                    |                 | 4,00   |      |
|                      |                         | Variância                  |                 | 24,999 |      |
|                      |                         | Erro Desvio                |                 | 5,000  |      |
|                      |                         | Mínimo                     |                 | 0      |      |
|                      |                         | Máximo                     |                 | 21     |      |
|                      |                         | Intervalo                  |                 | 21     |      |
|                      |                         | Amplitude interquartil     |                 | 8      |      |
|                      |                         | Assimetria                 |                 | ,930   | ,094 |
| DASS21 Stress Score  | Non-Medical (Other HCP) | Curtose                    |                 | ,350   | ,188 |
|                      |                         | Média                      |                 | 10,27  | ,209 |
|                      |                         | 95% Intervalo de Confiança | Limite inferior | 9,86   |      |
|                      |                         | para Média                 | Limite superior | 10,68  |      |
|                      |                         | 5% da média aparada        |                 | 10,26  |      |
|                      |                         | Mediana                    |                 | 10,00  |      |
|                      |                         | Variância                  |                 | 27,830 |      |

|                       |                         |  |                            |                 |       |
|-----------------------|-------------------------|--|----------------------------|-----------------|-------|
|                       |                         |  | Erro Desvio                | 5,275           |       |
|                       |                         |  | Mínimo                     | 0               |       |
|                       |                         |  | Máximo                     | 21              |       |
|                       |                         |  | Intervalo                  | 21              |       |
|                       |                         |  | Amplitude interquartil     | 8               |       |
|                       |                         |  | Assimetria                 | ,082            | ,097  |
|                       |                         |  | Curtose                    | -,781           | ,193  |
|                       | Medical                 |  | Média                      | 10,04           | ,211  |
|                       |                         |  | 95% Intervalo de Confiança | Limite inferior | 9,63  |
|                       |                         |  | para Média                 | Limite superior | 10,46 |
|                       |                         |  | 5% da média aparada        | 10,00           |       |
|                       |                         |  | Mediana                    | 10,00           |       |
|                       |                         |  | Variância                  | 29,900          |       |
|                       |                         |  | Erro Desvio                | 5,468           |       |
|                       |                         |  | Mínimo                     | 0               |       |
|                       |                         |  | Máximo                     | 21              |       |
|                       |                         |  | Intervalo                  | 21              |       |
|                       |                         |  | Amplitude interquartil     | 8               |       |
|                       |                         |  | Assimetria                 | ,133            | ,094  |
|                       |                         |  | Curtose                    | -,761           | ,188  |
| PHQ9 Depression Score | Non-Medical (Other HCP) |  | Média                      | 12,31           | ,248  |
|                       |                         |  | 95% Intervalo de Confiança | Limite inferior | 11,82 |
|                       |                         |  | para Média                 | Limite superior | 12,80 |
|                       |                         |  | 5% da média aparada        | 12,26           |       |
|                       |                         |  | Mediana                    | 12,00           |       |
|                       |                         |  | Variância                  | 39,402          |       |
|                       |                         |  | Erro Desvio                | 6,277           |       |
|                       |                         |  | Mínimo                     | 0               |       |
|                       |                         |  | Máximo                     | 27              |       |
|                       |                         |  | Intervalo                  | 27              |       |
|                       |                         |  | Amplitude interquartil     | 10              |       |
|                       |                         |  | Assimetria                 | ,122            | ,097  |
|                       |                         |  | Curtose                    | -,744           | ,193  |
|                       | Medical                 |  | Média                      | 11,71           | ,254  |
|                       |                         |  | 95% Intervalo de Confiança | Limite inferior | 11,21 |
|                       |                         |  | para Média                 | Limite superior | 12,21 |
|                       |                         |  | 5% da média aparada        | 11,58           |       |
|                       |                         |  | Mediana                    | 11,00           |       |
|                       |                         |  | Variância                  | 43,625          |       |
|                       |                         |  | Erro Desvio                | 6,605           |       |
|                       |                         |  | Mínimo                     | 0               |       |
|                       |                         |  | Máximo                     | 27              |       |
|                       |                         |  | Intervalo                  | 27              |       |
|                       |                         |  | Amplitude interquartil     | 10              |       |
|                       |                         |  | Assimetria                 | ,256            | ,094  |
|                       |                         |  | Curtose                    | -,747           | ,188  |

|                          |                         |                            |                 |        |        |
|--------------------------|-------------------------|----------------------------|-----------------|--------|--------|
| BRCS Score               | Non-Medical (Other HCP) | Média                      |                 | 12,26  | ,145   |
|                          |                         | 95% Intervalo de Confiança | Limite inferior | 11,98  |        |
|                          |                         | para Média                 | Limite superior | 12,55  |        |
|                          |                         | 5% da média aparada        |                 | 12,25  |        |
|                          |                         | Mediana                    |                 | 12,00  |        |
|                          |                         | Variância                  |                 | 13,350 |        |
|                          |                         | Erro Desvio                |                 | 3,654  |        |
|                          |                         | Mínimo                     |                 | 4      |        |
|                          |                         | Máximo                     |                 | 20     |        |
|                          |                         | Intervalo                  |                 | 16     |        |
|                          |                         | Amplitude interquartil     |                 | 5      |        |
|                          |                         | Assimetria                 |                 | ,064   | ,097   |
|                          |                         | Curtose                    |                 | -,619  | ,193   |
|                          | Medical                 | Média                      |                 | 12,56  | ,150   |
|                          |                         | 95% Intervalo de Confiança | Limite inferior | 12,26  |        |
|                          |                         | para Média                 | Limite superior | 12,85  |        |
|                          |                         | 5% da média aparada        |                 | 12,58  |        |
|                          |                         | Mediana                    |                 | 12,00  |        |
|                          |                         | Variância                  |                 | 15,070 |        |
|                          |                         | Erro Desvio                |                 | 3,882  |        |
|                          |                         | Mínimo                     |                 | 4      |        |
|                          |                         | Máximo                     |                 | 20     |        |
|                          |                         | Intervalo                  |                 | 16     |        |
|                          |                         | Amplitude interquartil     |                 | 5      |        |
|                          |                         | Assimetria                 |                 | ,001   | ,094   |
|                          |                         | Curtose                    |                 | -,615  | ,188   |
| OLBI Disengagement Score | Non-Medical (Other HCP) | Média                      |                 | 2,7365 | ,03216 |
|                          |                         | 95% Intervalo de Confiança | Limite inferior | 2,6734 |        |
|                          |                         | para Média                 | Limite superior | 2,7996 |        |
|                          |                         | 5% da média aparada        |                 | 2,7230 |        |
|                          |                         | Mediana                    |                 | 2,6250 |        |
|                          |                         | Variância                  |                 | ,661   |        |
|                          |                         | Erro Desvio                |                 | ,81289 |        |
|                          |                         | Mínimo                     |                 | 1,00   |        |
|                          |                         | Máximo                     |                 | 5,00   |        |
|                          |                         | Intervalo                  |                 | 4,00   |        |
|                          |                         | Amplitude interquartil     |                 | 1,25   |        |
|                          |                         | Assimetria                 |                 | ,204   | ,097   |
|                          |                         | Curtose                    |                 | -,303  | ,193   |
|                          | Medical                 | Média                      |                 | 2,8095 | ,03324 |
|                          |                         | 95% Intervalo de Confiança | Limite inferior | 2,7443 |        |
|                          |                         | para Média                 | Limite superior | 2,8748 |        |
|                          |                         | 5% da média aparada        |                 | 2,8018 |        |
|                          |                         | Mediana                    |                 | 2,7500 |        |
|                          |                         | Variância                  |                 | ,745   |        |
|                          |                         | Erro Desvio                |                 | ,86305 |        |

|                       |                         |                            |                 |        |
|-----------------------|-------------------------|----------------------------|-----------------|--------|
|                       |                         | Mínimo                     | 1,00            |        |
|                       |                         | Máximo                     | 5,00            |        |
|                       |                         | Intervalo                  | 4,00            |        |
|                       |                         | Amplitude interquartil     | 1,13            |        |
|                       |                         | Assimetria                 | ,158            | ,094   |
|                       |                         | Curtose                    | -,532           | ,188   |
| OLBI Exhaustion Score | Non-Medical (Other HCP) | Média                      | 3,5808          | ,02740 |
|                       |                         | 95% Intervalo de Confiança | Limite inferior | 3,5270 |
|                       |                         | para Média                 | Limite superior | 3,6346 |
|                       |                         | 5% da média aparada        | 3,5995          |        |
|                       |                         | Mediana                    | 3,6300          |        |
|                       |                         | Variância                  | ,480            |        |
|                       |                         | Erro Desvio                | ,69267          |        |
|                       |                         | Mínimo                     | 1,50            |        |
|                       |                         | Máximo                     | 5,00            |        |
|                       |                         | Intervalo                  | 3,50            |        |
|                       |                         | Amplitude interquartil     | ,87             |        |
|                       |                         | Assimetria                 | -,373           | ,097   |
|                       |                         | Curtose                    | -,031           | ,193   |
|                       | Medical                 | Média                      | 3,5298          | ,02985 |
|                       |                         | 95% Intervalo de Confiança | Limite inferior | 3,4711 |
|                       |                         | para Média                 | Limite superior | 3,5884 |
|                       |                         | 5% da média aparada        | 3,5584          |        |
|                       |                         | Mediana                    | 3,6300          |        |
|                       |                         | Variância                  | ,601            |        |
|                       |                         | Erro Desvio                | ,77501          |        |
|                       |                         | Mínimo                     | 1,00            |        |
|                       |                         | Máximo                     | 5,00            |        |
|                       |                         | Intervalo                  | 4,00            |        |
|                       |                         | Amplitude interquartil     | 1,00            |        |
|                       |                         | Assimetria                 | -,607           | ,094   |
|                       |                         | Curtose                    | ,278            | ,188   |
| OLBI Total Score      | Non-Medical (Other HCP) | Média                      | 3,1586          | ,02615 |
|                       |                         | 95% Intervalo de Confiança | Limite inferior | 3,1073 |
|                       |                         | para Média                 | Limite superior | 3,2100 |
|                       |                         | 5% da média aparada        | 3,1611          |        |
|                       |                         | Mediana                    | 3,1900          |        |
|                       |                         | Variância                  | ,437            |        |
|                       |                         | Erro Desvio                | ,66095          |        |
|                       |                         | Mínimo                     | 1,25            |        |
|                       |                         | Máximo                     | 4,88            |        |
|                       |                         | Intervalo                  | 3,63            |        |
|                       |                         | Amplitude interquartil     | ,94             |        |
|                       |                         | Assimetria                 | -,042           | ,097   |
|                       |                         | Curtose                    | -,272           | ,193   |
|                       | Medical                 | Média                      | 3,1698          | ,02832 |

|                                                                                                                           |                         |                                          |                 |        |      |
|---------------------------------------------------------------------------------------------------------------------------|-------------------------|------------------------------------------|-----------------|--------|------|
|                                                                                                                           |                         | 95% Intervalo de Confiança<br>para Média | Limite inferior | 3,1142 |      |
|                                                                                                                           |                         |                                          | Limite superior | 3,2254 |      |
|                                                                                                                           |                         | 5% da média aparada                      |                 | 3,1823 |      |
|                                                                                                                           |                         | Mediana                                  |                 | 3,1900 |      |
|                                                                                                                           |                         | Variância                                |                 | ,540   |      |
|                                                                                                                           |                         | Erro Desvio                              |                 | ,73517 |      |
|                                                                                                                           |                         | Mínimo                                   |                 | 1,00   |      |
|                                                                                                                           |                         | Máximo                                   |                 | 5,00   |      |
|                                                                                                                           |                         | Intervalo                                |                 | 4,00   |      |
|                                                                                                                           |                         | Amplitude interquartil                   |                 | 1,06   |      |
|                                                                                                                           |                         | Assimetria                               |                 | -,203  | ,094 |
|                                                                                                                           |                         | Curtose                                  |                 | -,244  | ,188 |
| Na sua opinião, qual o seu grau de autonomia para decidir condutas no trabalho? (EAV 1-10)                                | Non-Medical (Other HCP) | Média                                    |                 | 6,58   | ,083 |
|                                                                                                                           |                         | 95% Intervalo de Confiança<br>para Média | Limite inferior | 6,42   |      |
|                                                                                                                           |                         |                                          | Limite superior | 6,75   |      |
|                                                                                                                           |                         | 5% da média aparada                      |                 | 6,68   |      |
|                                                                                                                           |                         | Mediana                                  |                 | 7,00   |      |
|                                                                                                                           |                         | Variância                                |                 | 4,388  |      |
|                                                                                                                           |                         | Erro Desvio                              |                 | 2,095  |      |
|                                                                                                                           |                         | Mínimo                                   |                 | 1      |      |
|                                                                                                                           |                         | Máximo                                   |                 | 10     |      |
|                                                                                                                           |                         | Intervalo                                |                 | 9      |      |
|                                                                                                                           |                         | Amplitude interquartil                   |                 | 3      |      |
|                                                                                                                           |                         | Assimetria                               |                 | -,728  | ,097 |
|                                                                                                                           |                         | Curtose                                  |                 | ,050   | ,193 |
|                                                                                                                           |                         | Média                                    |                 | 6,43   | ,081 |
|                                                                                                                           | Medical                 | 95% Intervalo de Confiança<br>para Média | Limite inferior | 6,27   |      |
|                                                                                                                           |                         |                                          | Limite superior | 6,59   |      |
|                                                                                                                           |                         | 5% da média aparada                      |                 | 6,51   |      |
|                                                                                                                           |                         | Mediana                                  |                 | 7,00   |      |
|                                                                                                                           |                         | Variância                                |                 | 4,472  |      |
|                                                                                                                           |                         | Erro Desvio                              |                 | 2,115  |      |
|                                                                                                                           |                         | Mínimo                                   |                 | 1      |      |
|                                                                                                                           |                         | Máximo                                   |                 | 10     |      |
|                                                                                                                           |                         | Intervalo                                |                 | 9      |      |
|                                                                                                                           |                         | Amplitude interquartil                   |                 | 3      |      |
|                                                                                                                           |                         | Assimetria                               |                 | -,664  | ,094 |
|                                                                                                                           |                         | Curtose                                  |                 | -,151  | ,188 |
| Na sua opinião, qual o grau de adequação da organização pedagógica de seu programa de residência profissional? (EAV 1-10) | Non-Medical (Other HCP) | Média                                    |                 | 5,34   | ,099 |
|                                                                                                                           |                         | 95% Intervalo de Confiança<br>para Média | Limite inferior | 5,15   |      |
|                                                                                                                           |                         |                                          | Limite superior | 5,54   |      |
|                                                                                                                           |                         | 5% da média aparada                      |                 | 5,35   |      |
|                                                                                                                           |                         | Mediana                                  |                 | 5,00   |      |
|                                                                                                                           |                         | Variância                                |                 | 6,260  |      |
|                                                                                                                           |                         | Erro Desvio                              |                 | 2,502  |      |
|                                                                                                                           |                         | Mínimo                                   |                 | 1      |      |

|                               |         |                            |                 |      |
|-------------------------------|---------|----------------------------|-----------------|------|
| Média Ponderada (Definição 1) | Medical | Máximo                     | 10              |      |
|                               |         | Intervalo                  | 9               |      |
|                               |         | Amplitude interquartil     | 4               |      |
|                               |         | Assimetria                 | -,143           | ,097 |
|                               |         | Curtose                    | -,982           | ,193 |
|                               |         | Média                      | 6,18            | ,091 |
|                               |         | 95% Intervalo de Confiança | Limite inferior | 6,00 |
|                               |         | para Média                 | Limite superior | 6,36 |
|                               |         | 5% da média aparada        | 6,26            |      |
|                               |         | Mediana                    | 7,00            |      |
|                               |         | Variância                  | 5,609           |      |
|                               |         | Erro Desvio                | 2,368           |      |
|                               |         | Mínimo                     | 1               |      |
|                               |         | Máximo                     | 10              |      |
|                               |         | Intervalo                  | 9               |      |
|                               |         | Amplitude interquartil     | 3               |      |
|                               |         | Assimetria                 | -,534           | ,094 |
|                               |         | Curtose                    | -,511           | ,188 |

| Percentis                     |                                                                                            |                           |        |        |        |        |        |        |        |
|-------------------------------|--------------------------------------------------------------------------------------------|---------------------------|--------|--------|--------|--------|--------|--------|--------|
|                               |                                                                                            | Percentis                 |        |        |        |        |        |        |        |
|                               |                                                                                            | Type of residency program | 5      | 10     | 25     | 50     | 75     | 90     | 95     |
| Média Ponderada (Definição 1) | Age                                                                                        | Non-Medical (Other HCP)   | 22,00  | 23,00  | 24,00  | 25,00  | 27,00  | 31,00  | 35,00  |
|                               |                                                                                            | Medical                   | 25,00  | 25,00  | 27,00  | 28,00  | 31,00  | 34,00  | 36,00  |
|                               | DASS21 Depression Score                                                                    | Non-Medical (Other HCP)   | ,00    | 1,00   | 3,00   | 7,00   | 11,00  | 16,00  | 19,00  |
|                               |                                                                                            | Medical                   | ,00    | 1,00   | 3,00   | 7,00   | 11,25  | 17,00  | 19,00  |
|                               | DASS21 Anxiety Score                                                                       | Non-Medical (Other HCP)   | ,00    | 1,00   | 2,00   | 6,00   | 10,00  | 14,00  | 17,00  |
|                               |                                                                                            | Medical                   | ,00    | ,00    | 1,00   | 4,00   | 9,00   | 12,00  | 15,00  |
|                               | DASS21 Stress Score                                                                        | Non-Medical (Other HCP)   | 1,00   | 3,00   | 6,00   | 10,00  | 14,00  | 17,00  | 19,00  |
|                               |                                                                                            | Medical                   | 1,00   | 3,00   | 6,00   | 10,00  | 14,00  | 18,00  | 20,00  |
|                               | PHQ9 Depression Score                                                                      | Non-Medical (Other HCP)   | 2,00   | 4,00   | 7,00   | 12,00  | 17,00  | 21,00  | 23,00  |
|                               |                                                                                            | Medical                   | 2,00   | 3,00   | 6,00   | 11,00  | 16,00  | 21,00  | 23,00  |
|                               | BRCS Score                                                                                 | Non-Medical (Other HCP)   | 6,00   | 8,00   | 10,00  | 12,00  | 15,00  | 17,00  | 18,00  |
|                               |                                                                                            | Medical                   | 6,00   | 7,00   | 10,00  | 12,00  | 15,00  | 18,00  | 19,00  |
|                               | OLBI Disengagement Score                                                                   | Non-Medical (Other HCP)   | 1,3750 | 1,6250 | 2,1250 | 2,6250 | 3,3750 | 3,7500 | 4,1250 |
|                               |                                                                                            | Medical                   | 1,3750 | 1,6250 | 2,2500 | 2,7500 | 3,3750 | 4,0000 | 4,2500 |
|                               | OLBI Exhaustion Score                                                                      | Non-Medical (Other HCP)   | 2,2900 | 2,6300 | 3,1300 | 3,6300 | 4,0000 | 4,5000 | 4,7100 |
|                               |                                                                                            | Medical                   | 2,1300 | 2,5000 | 3,1300 | 3,6300 | 4,1300 | 4,4300 | 4,6300 |
|                               | OLBI Total Score                                                                           | Non-Medical (Other HCP)   | 2,0600 | 2,3100 | 2,6900 | 3,1900 | 3,6300 | 4,0400 | 4,2500 |
|                               |                                                                                            | Medical                   | 1,8800 | 2,2500 | 2,6300 | 3,1900 | 3,6900 | 4,1300 | 4,3800 |
|                               | Na sua opinião, qual o seu grau de autonomia para decidir condutas no trabalho? (EAV 1-10) | Non-Medical (Other HCP)   | 2,00   | 4,00   | 5,00   | 7,00   | 8,00   | 9,00   | 9,00   |
|                               |                                                                                            | Medical                   | 2,00   | 3,00   | 5,00   | 7,00   | 8,00   | 9,00   | 9,00   |

|                |                                                                                                                           |                         |      |      |        |        |        |      |       |
|----------------|---------------------------------------------------------------------------------------------------------------------------|-------------------------|------|------|--------|--------|--------|------|-------|
|                | Na sua opinião, qual o grau de adequação da organização pedagógica de seu programa de residência profissional? (EAV 1-10) | Non-Medical (Other HCP) | 1,00 | 2,00 | 3,00   | 5,00   | 7,00   | 8,00 | 9,00  |
|                |                                                                                                                           | Medical                 | 1,75 | 3,00 | 5,00   | 7,00   | 8,00   | 9,00 | 10,00 |
| Teste de Tukey | Age                                                                                                                       | Non-Medical (Other HCP) |      |      | 24,00  | 25,00  | 27,00  |      |       |
|                |                                                                                                                           | Medical                 |      |      | 27,00  | 28,00  | 31,00  |      |       |
|                | DASS21 Depression Score                                                                                                   | Non-Medical (Other HCP) |      |      | 3,00   | 7,00   | 11,00  |      |       |
|                |                                                                                                                           | Medical                 |      |      | 3,00   | 7,00   | 11,00  |      |       |
|                | DASS21 Anxiety Score                                                                                                      | Non-Medical (Other HCP) |      |      | 2,00   | 6,00   | 10,00  |      |       |
|                |                                                                                                                           | Medical                 |      |      | 1,00   | 4,00   | 9,00   |      |       |
|                | DASS21 Stress Score                                                                                                       | Non-Medical (Other HCP) |      |      | 6,00   | 10,00  | 14,00  |      |       |
|                |                                                                                                                           | Medical                 |      |      | 6,00   | 10,00  | 14,00  |      |       |
|                | PHQ9 Depression Score                                                                                                     | Non-Medical (Other HCP) |      |      | 7,00   | 12,00  | 17,00  |      |       |
|                |                                                                                                                           | Medical                 |      |      | 6,00   | 11,00  | 16,00  |      |       |
|                | BRCS Score                                                                                                                | Non-Medical (Other HCP) |      |      | 10,00  | 12,00  | 15,00  |      |       |
|                |                                                                                                                           | Medical                 |      |      | 10,00  | 12,00  | 15,00  |      |       |
|                | OLBI Disengagement Score                                                                                                  | Non-Medical (Other HCP) |      |      | 2,1250 | 2,6250 | 3,3125 |      |       |
|                |                                                                                                                           | Medical                 |      |      | 2,2500 | 2,7500 | 3,3750 |      |       |
|                | OLBI Exhaustion Score                                                                                                     | Non-Medical (Other HCP) |      |      | 3,1300 | 3,6300 | 4,0000 |      |       |
|                |                                                                                                                           | Medical                 |      |      | 3,1300 | 3,6300 | 4,1300 |      |       |
|                | OLBI Total Score                                                                                                          | Non-Medical (Other HCP) |      |      | 2,6900 | 3,1900 | 3,6300 |      |       |
|                |                                                                                                                           | Medical                 |      |      | 2,6300 | 3,1900 | 3,6900 |      |       |
|                | Na sua opinião, qual o seu grau de autonomia para decidir condutas no trabalho? (EAV 1-10)                                | Non-Medical (Other HCP) |      |      | 5,00   | 7,00   | 8,00   |      |       |
|                |                                                                                                                           | Medical                 |      |      | 5,00   | 7,00   | 8,00   |      |       |
|                | Na sua opinião, qual o grau de adequação da organização pedagógica de seu programa de residência profissional? (EAV 1-10) | Non-Medical (Other HCP) |      |      | 3,00   | 5,00   | 7,00   |      |       |
|                |                                                                                                                           | Medical                 |      |      | 5,00   | 7,00   | 8,00   |      |       |

Testes de Normalidade

|                         | Type of residency program | Kolmogorov-Smirnov <sup>a</sup> |     |      | Shapiro-Wilk |     |      |
|-------------------------|---------------------------|---------------------------------|-----|------|--------------|-----|------|
|                         |                           | Estatística                     | df  | Sig. | Estatística  | df  | Sig. |
| Age                     | Non-Medical (Other HCP)   | ,216                            | 599 | ,000 | ,749         | 599 | ,000 |
|                         | Medical                   | ,160                            | 631 | ,000 | ,823         | 631 | ,000 |
| DASS21 Depression Score | Non-Medical (Other HCP)   | ,104                            | 639 | ,000 | ,944         | 639 | ,000 |
|                         | Medical                   | ,117                            | 674 | ,000 | ,933         | 674 | ,000 |
| DASS21 Anxiety Score    | Non-Medical (Other HCP)   | ,113                            | 639 | ,000 | ,929         | 639 | ,000 |
|                         | Medical                   | ,136                            | 674 | ,000 | ,902         | 674 | ,000 |
| DASS21 Stress Score     | Non-Medical (Other HCP)   | ,077                            | 639 | ,000 | ,979         | 639 | ,000 |
|                         | Medical                   | ,075                            | 674 | ,000 | ,977         | 674 | ,000 |
| PHQ9 Depression Score   | Non-Medical (Other HCP)   | ,069                            | 639 | ,000 | ,984         | 639 | ,000 |

|                                                                                                                           |                         |      |     |       |      |     |      |
|---------------------------------------------------------------------------------------------------------------------------|-------------------------|------|-----|-------|------|-----|------|
|                                                                                                                           | Medical                 | ,073 | 674 | ,000  | ,976 | 674 | ,000 |
| BRCS Score                                                                                                                | Non-Medical (Other HCP) | ,069 | 639 | ,000  | ,983 | 639 | ,000 |
|                                                                                                                           | Medical                 | ,067 | 674 | ,000  | ,981 | 674 | ,000 |
| OLBI Disengagement Score                                                                                                  | Non-Medical (Other HCP) | ,058 | 639 | ,000  | ,991 | 639 | ,000 |
|                                                                                                                           | Medical                 | ,053 | 674 | ,000  | ,989 | 674 | ,000 |
| OLBI Exhaustion Score                                                                                                     | Non-Medical (Other HCP) | ,058 | 639 | ,000  | ,985 | 639 | ,000 |
|                                                                                                                           | Medical                 | ,083 | 674 | ,000  | ,973 | 674 | ,000 |
| OLBI Total Score                                                                                                          | Non-Medical (Other HCP) | ,028 | 639 | ,200* | ,997 | 639 | ,340 |
|                                                                                                                           | Medical                 | ,032 | 674 | ,096  | ,994 | 674 | ,006 |
| Na sua opinião, qual o seu grau de autonomia para decidir condutas no trabalho? (EAV 1-10)                                | Non-Medical (Other HCP) | ,186 | 639 | ,000  | ,932 | 639 | ,000 |
|                                                                                                                           | Medical                 | ,188 | 674 | ,000  | ,935 | 674 | ,000 |
| Na sua opinião, qual o grau de adequação da organização pedagógica de seu programa de residência profissional? (EAV 1-10) | Non-Medical (Other HCP) | ,134 | 639 | ,000  | ,952 | 639 | ,000 |
|                                                                                                                           | Medical                 | ,169 | 674 | ,000  | ,940 | 674 | ,000 |

\*. Este é um limite inferior da significância verdadeira.

a. Correlação de Significância de Lilliefors

Age

Histogramas

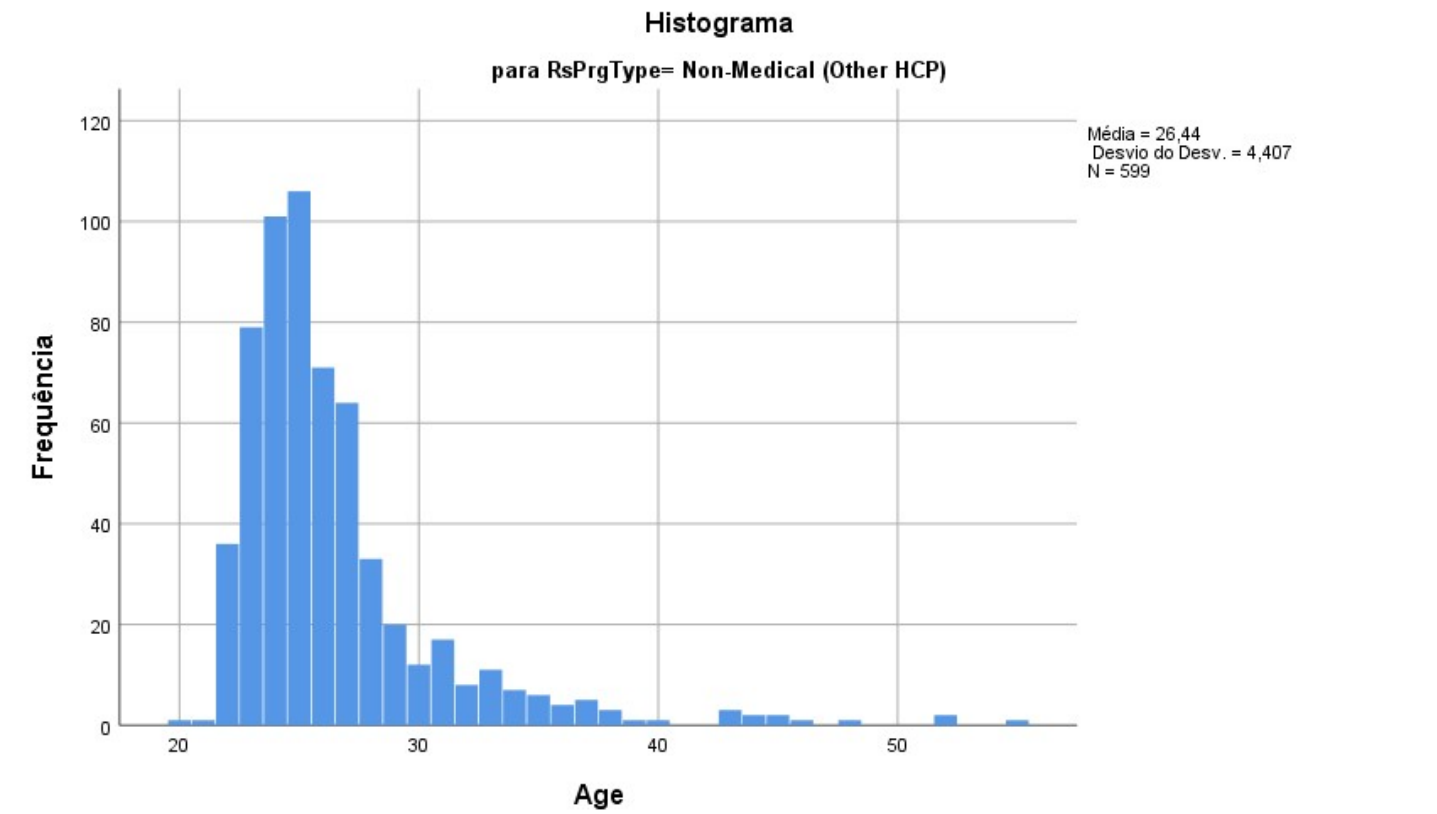

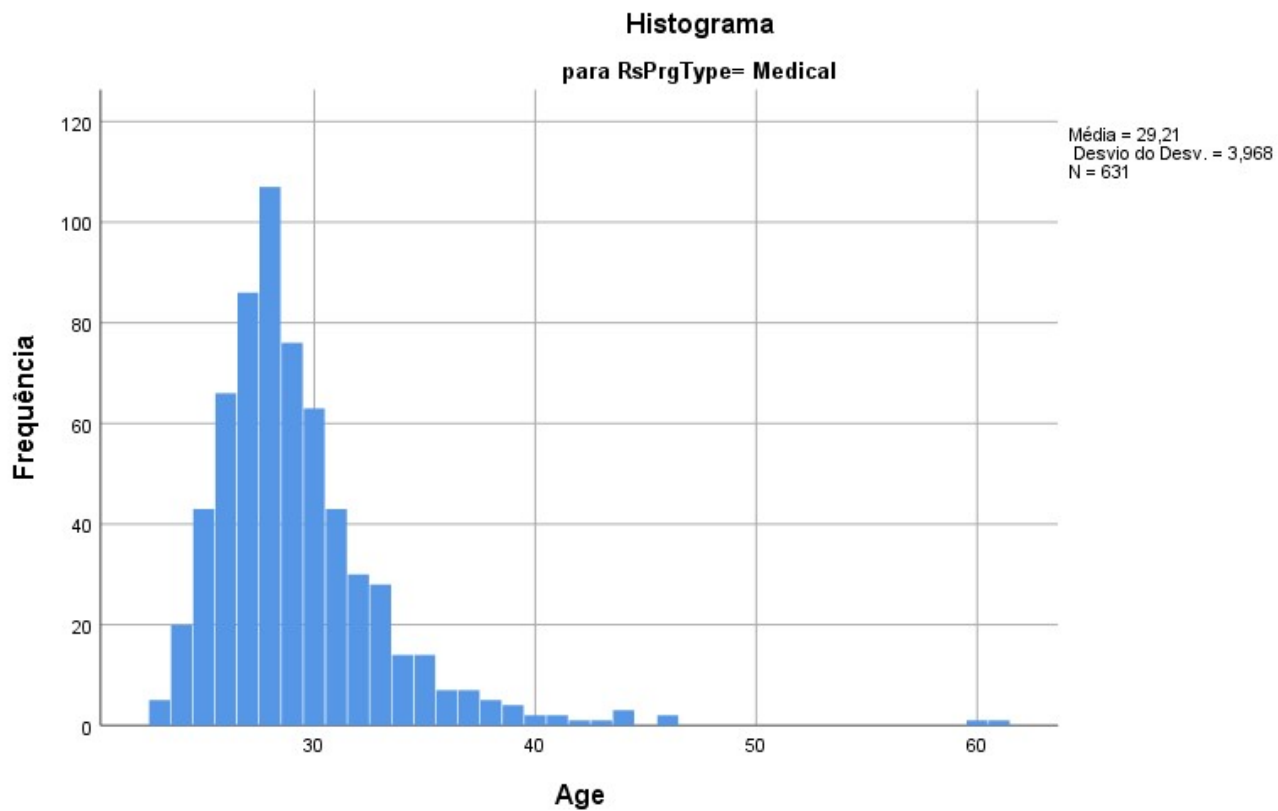

Gráfico Q-Q normais

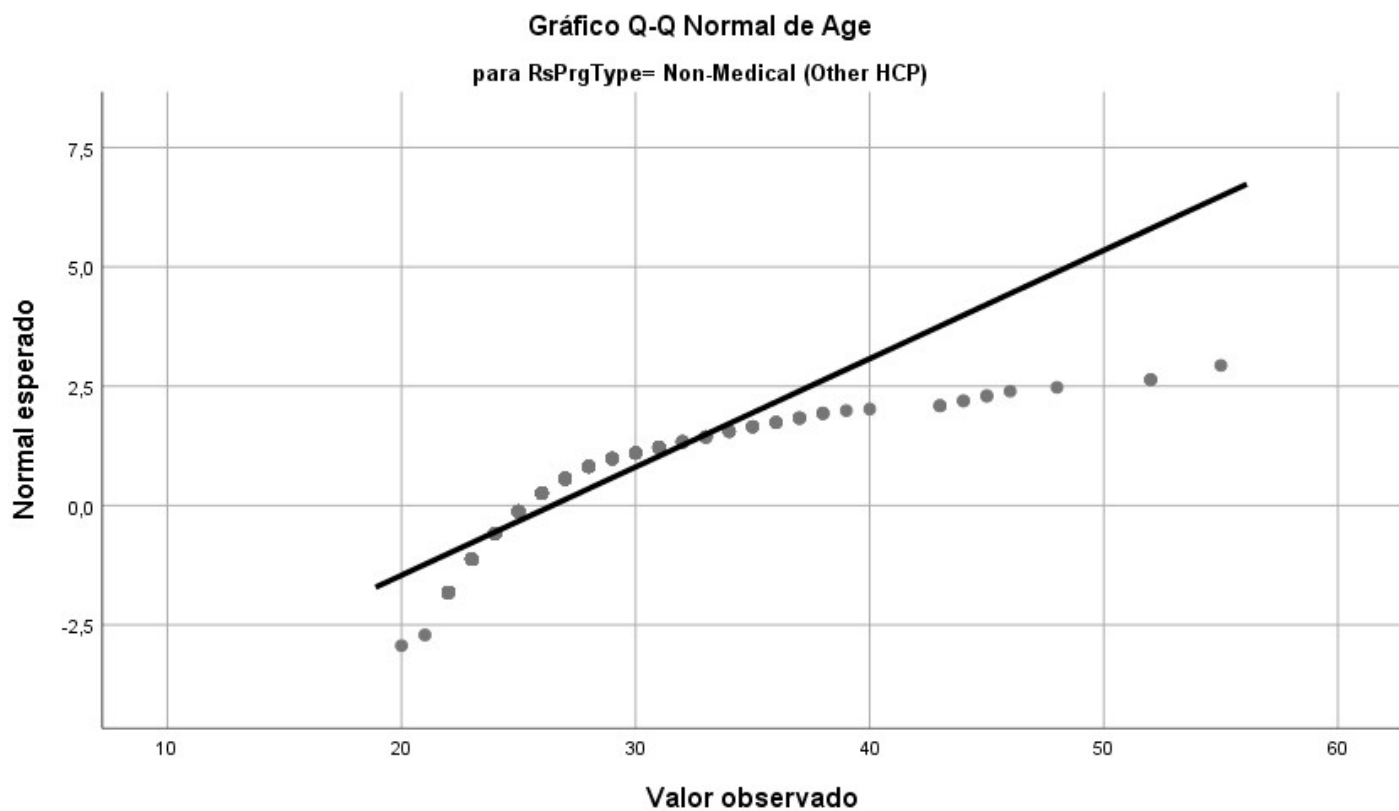

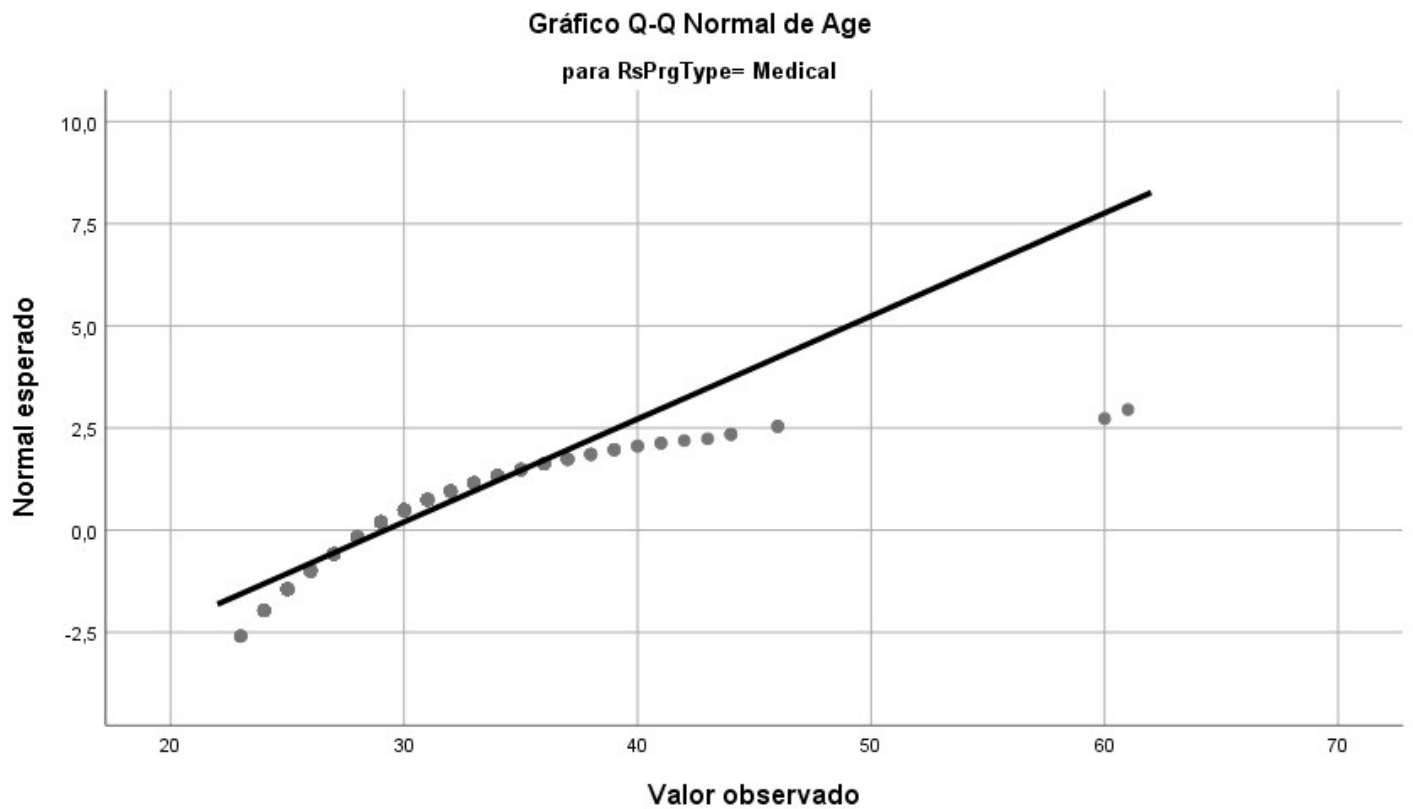

Gráfico Q-Q normais sem tendência

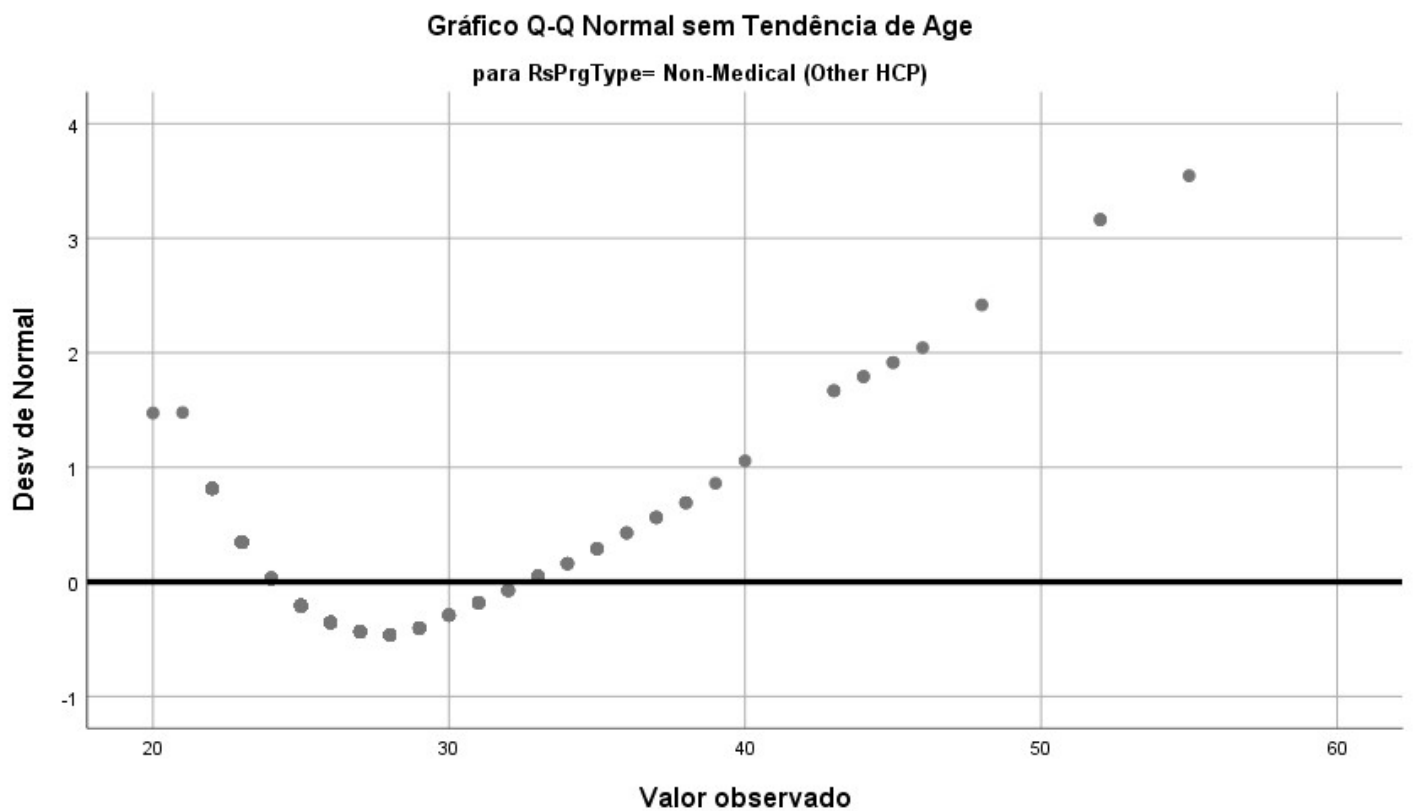

Gráfico Q-Q Normal sem Tendência de Age  
para RsPrgType= Medical

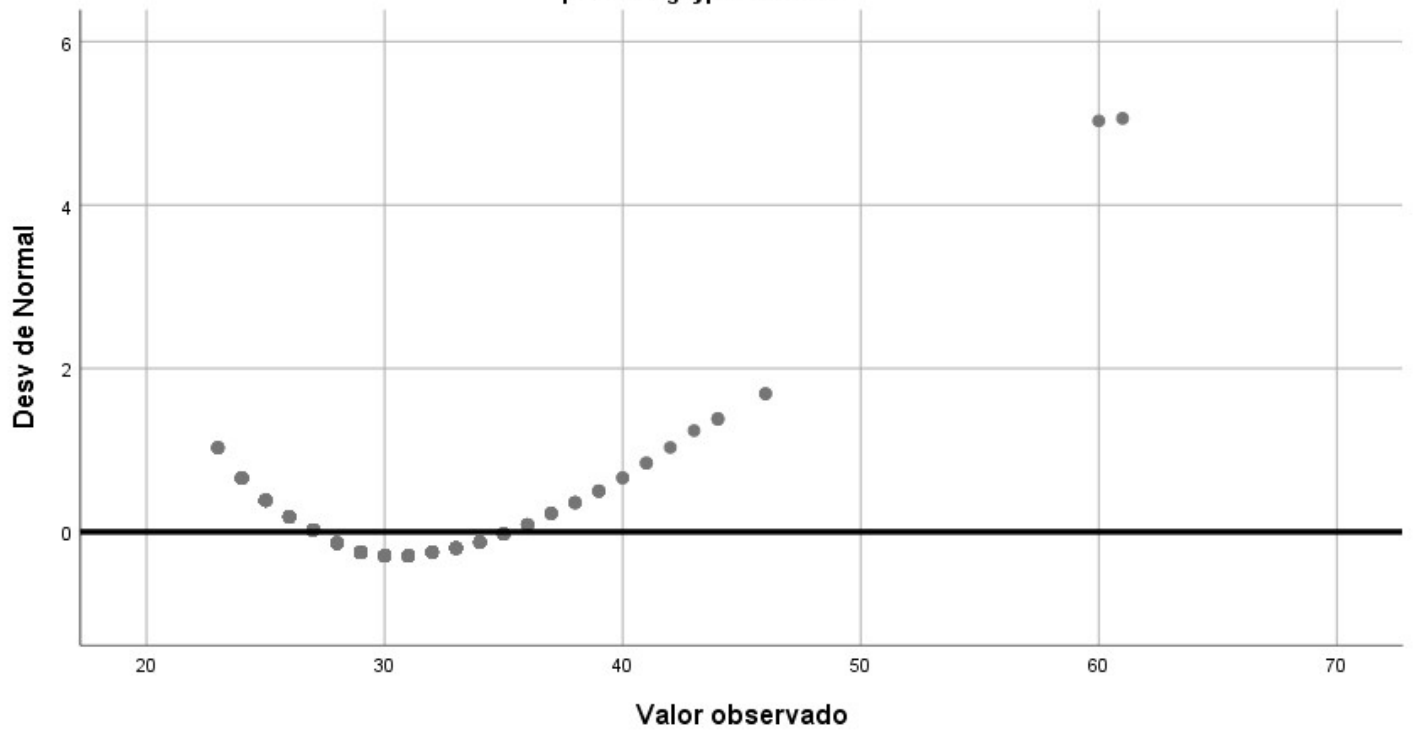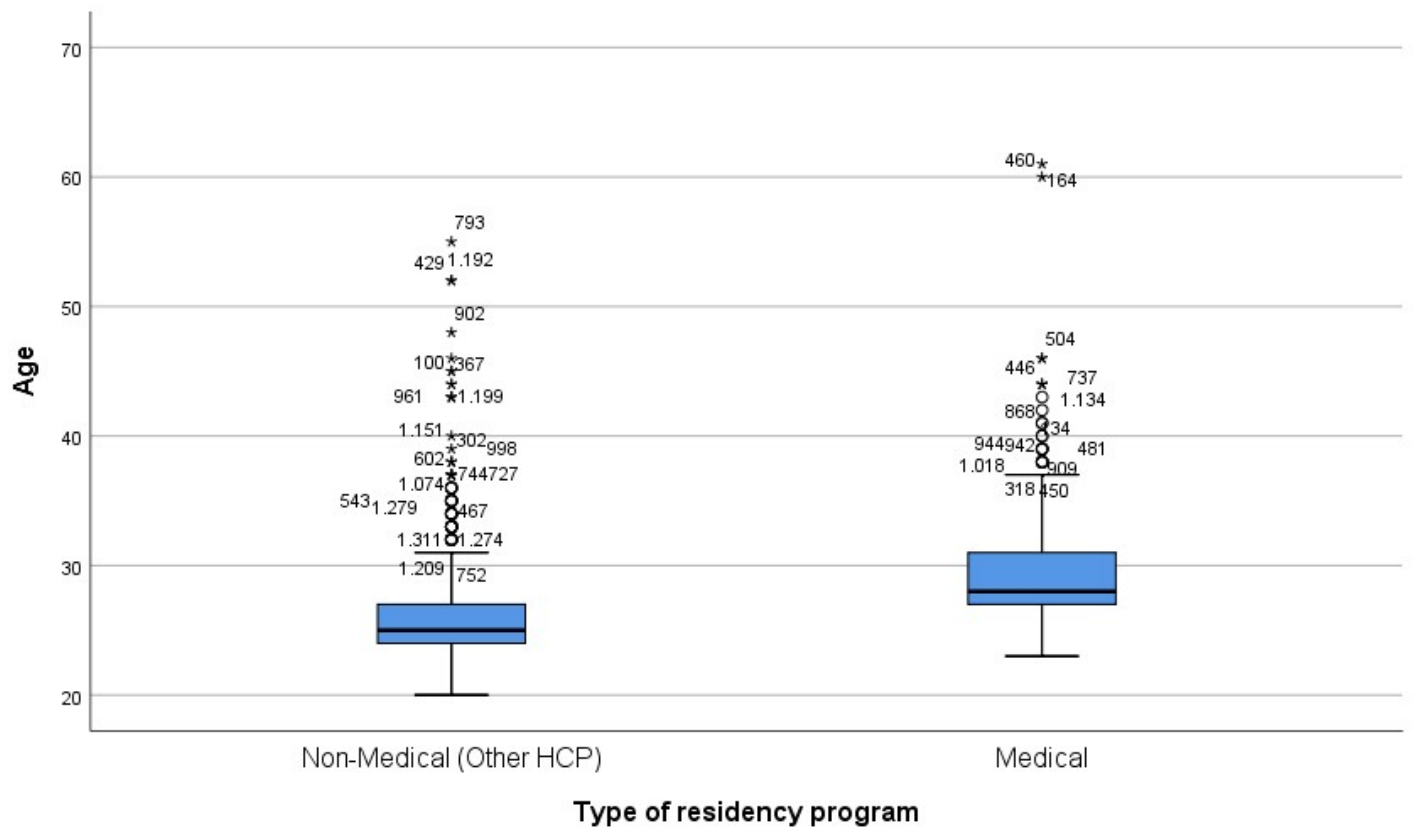

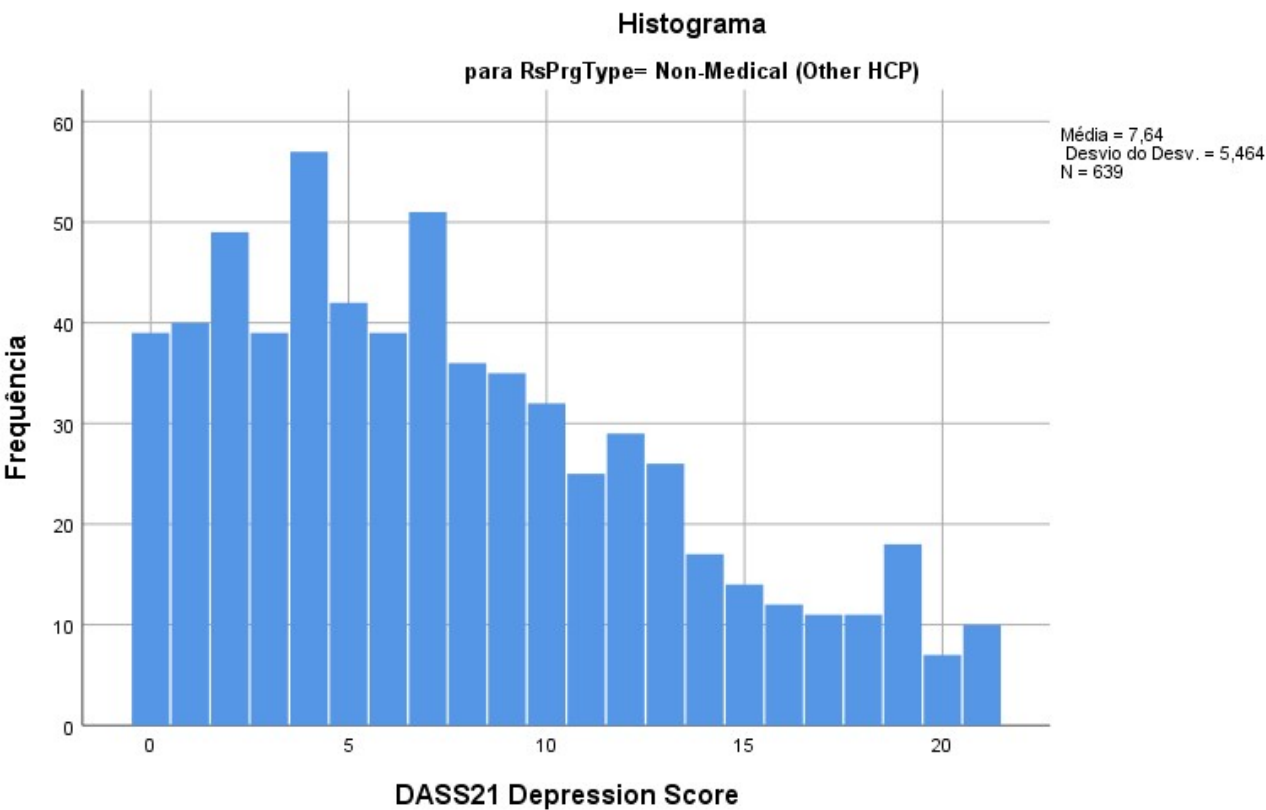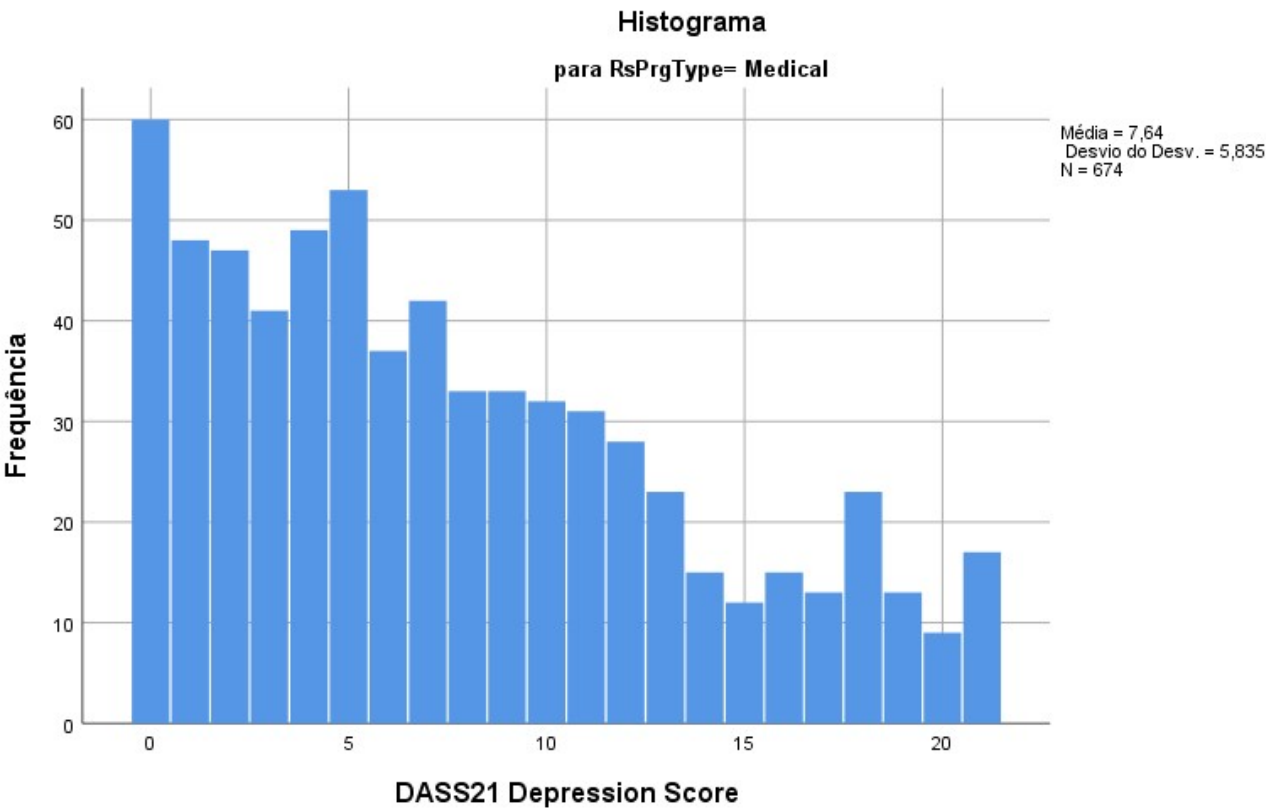

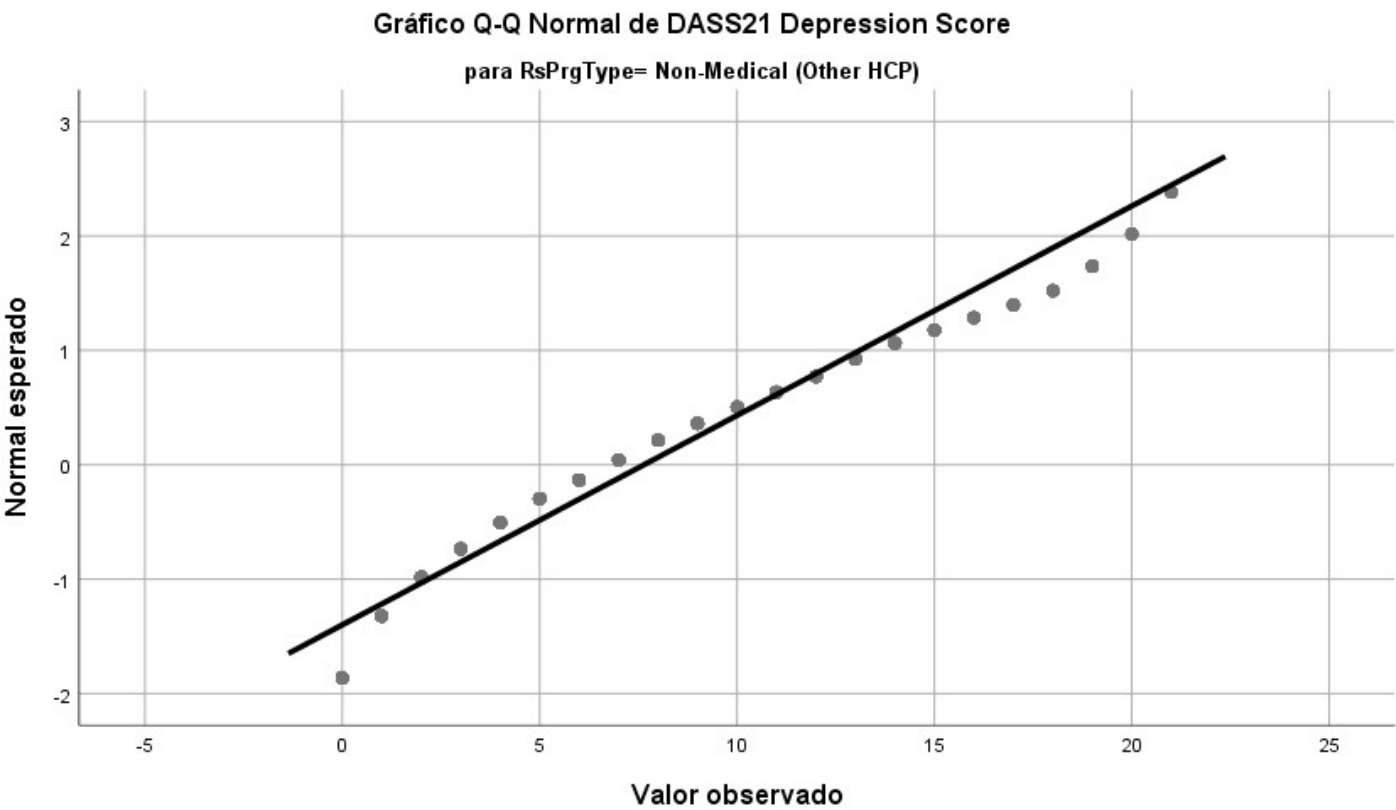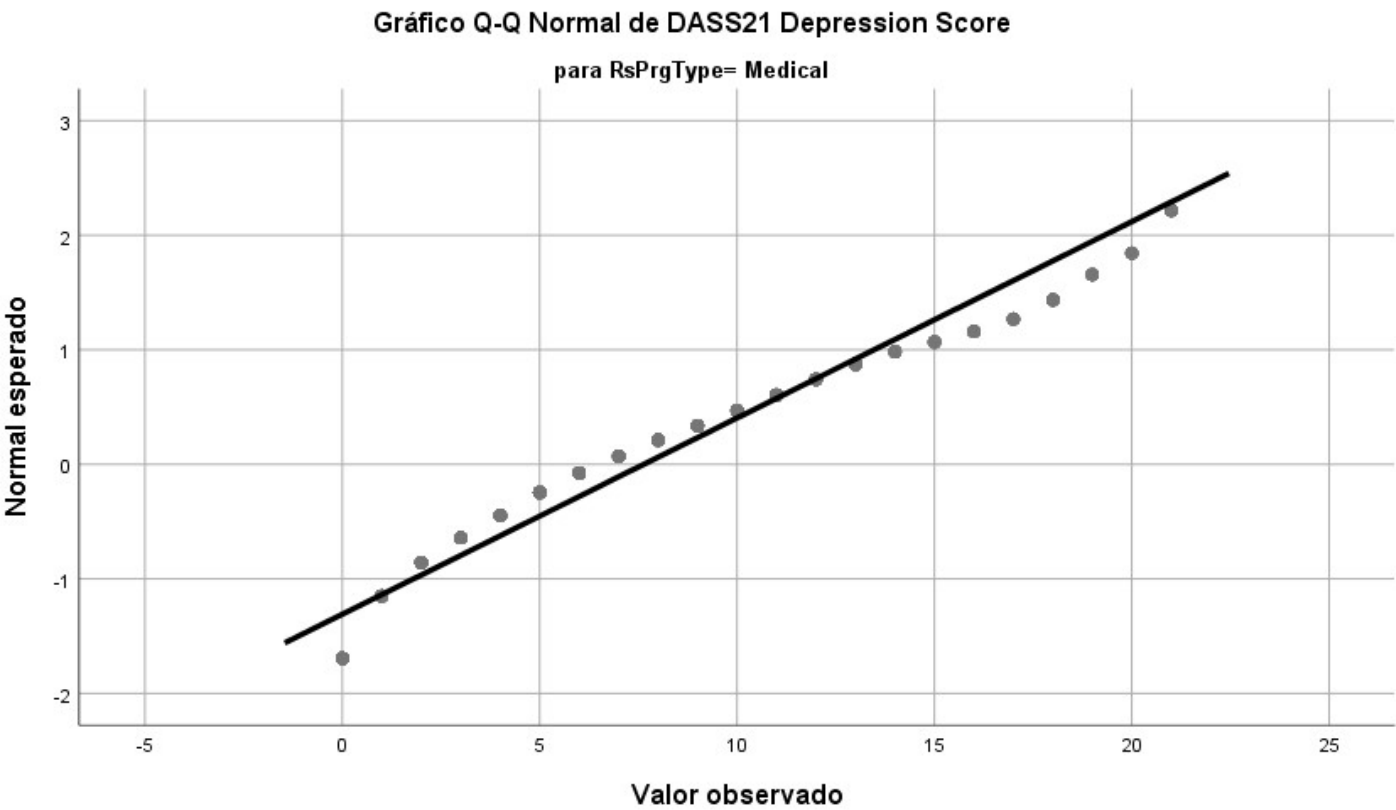

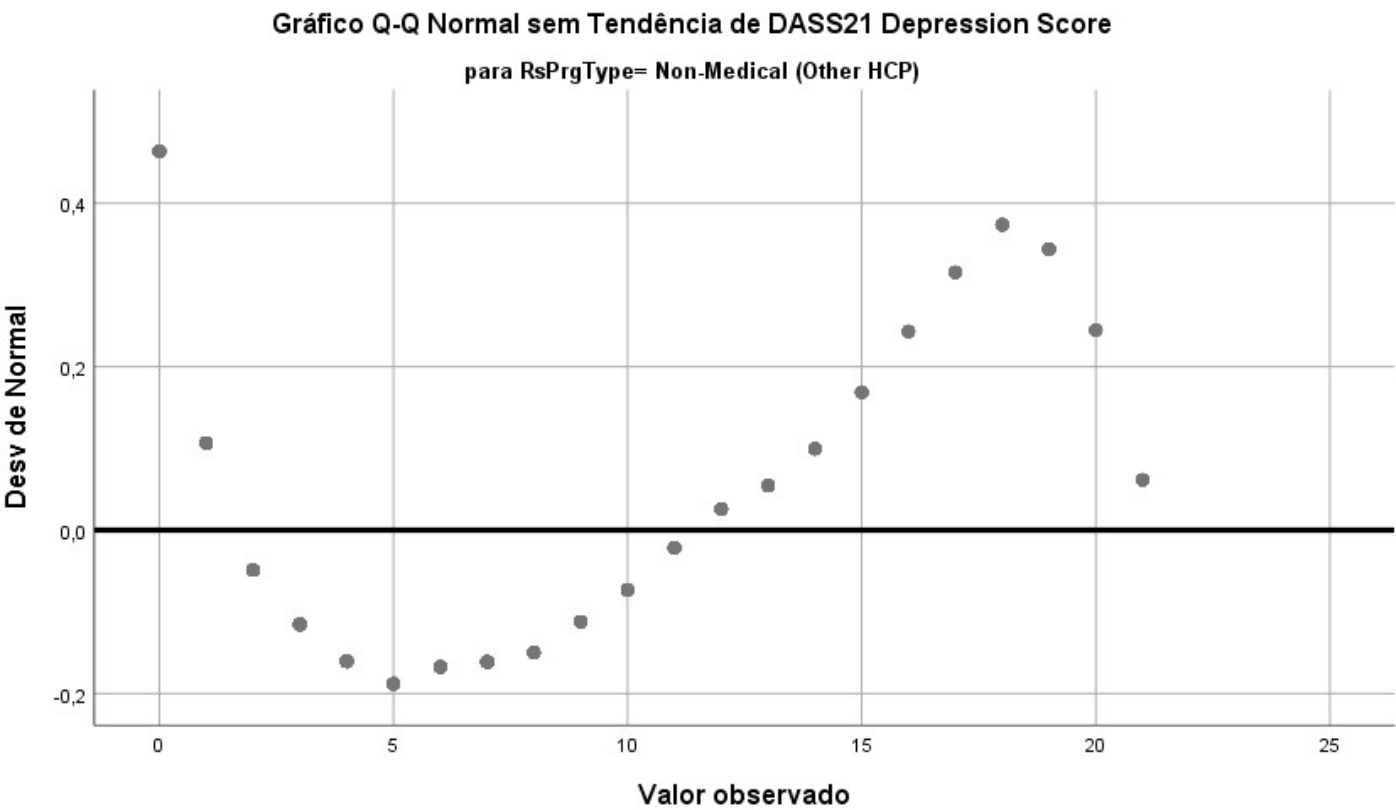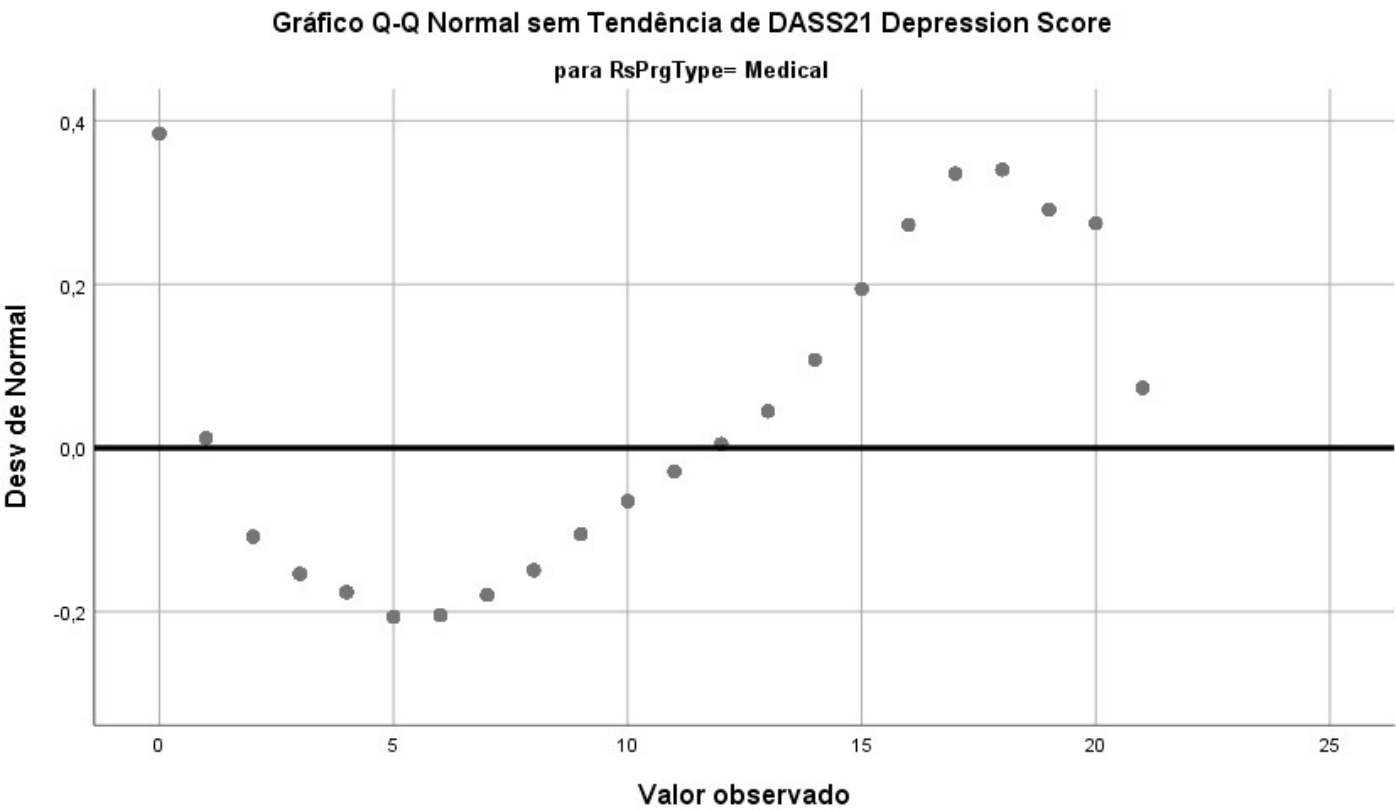

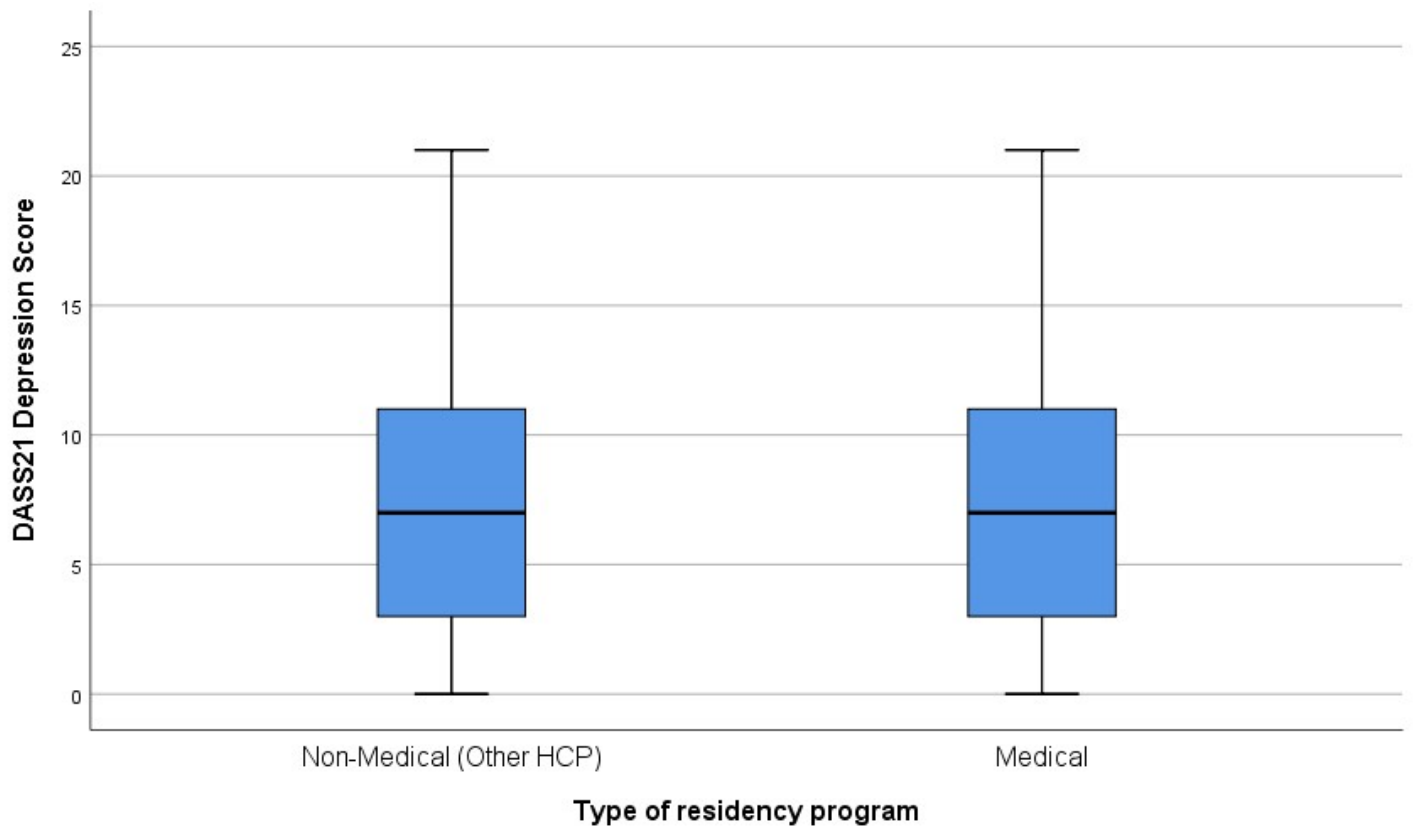

DASS21 Anxiety Score

Histogramas

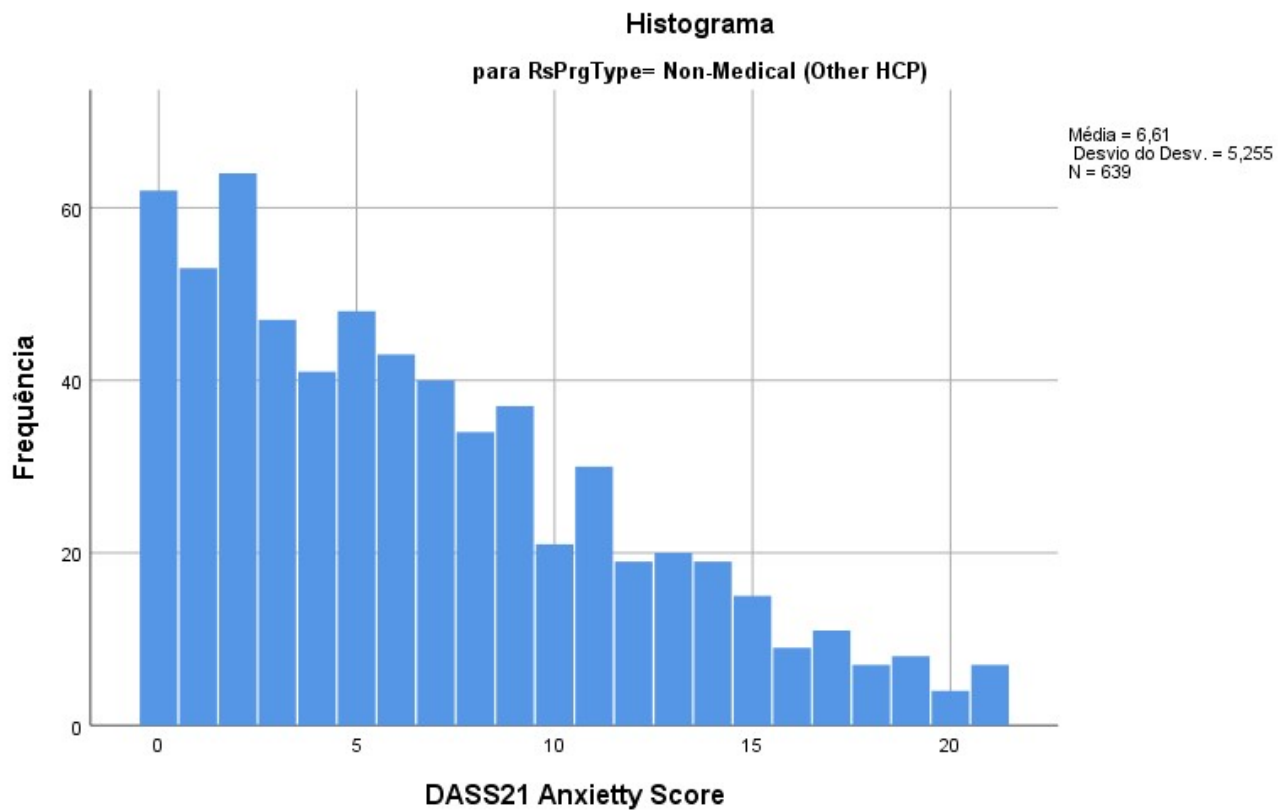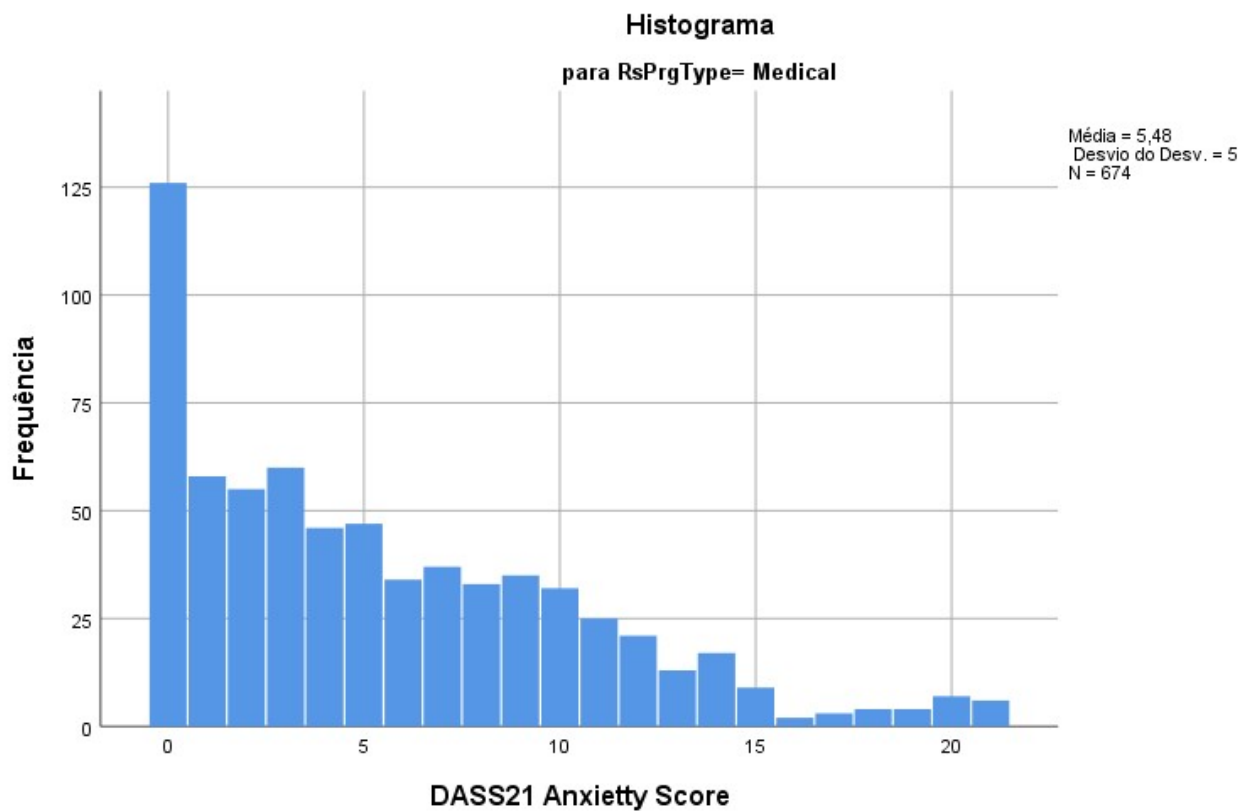

Gráfico Q-Q normais

Gráfico Q-Q Normal de DASS21 Anxiety Score  
para RsPrgType= Non-Medical (Other HCP)

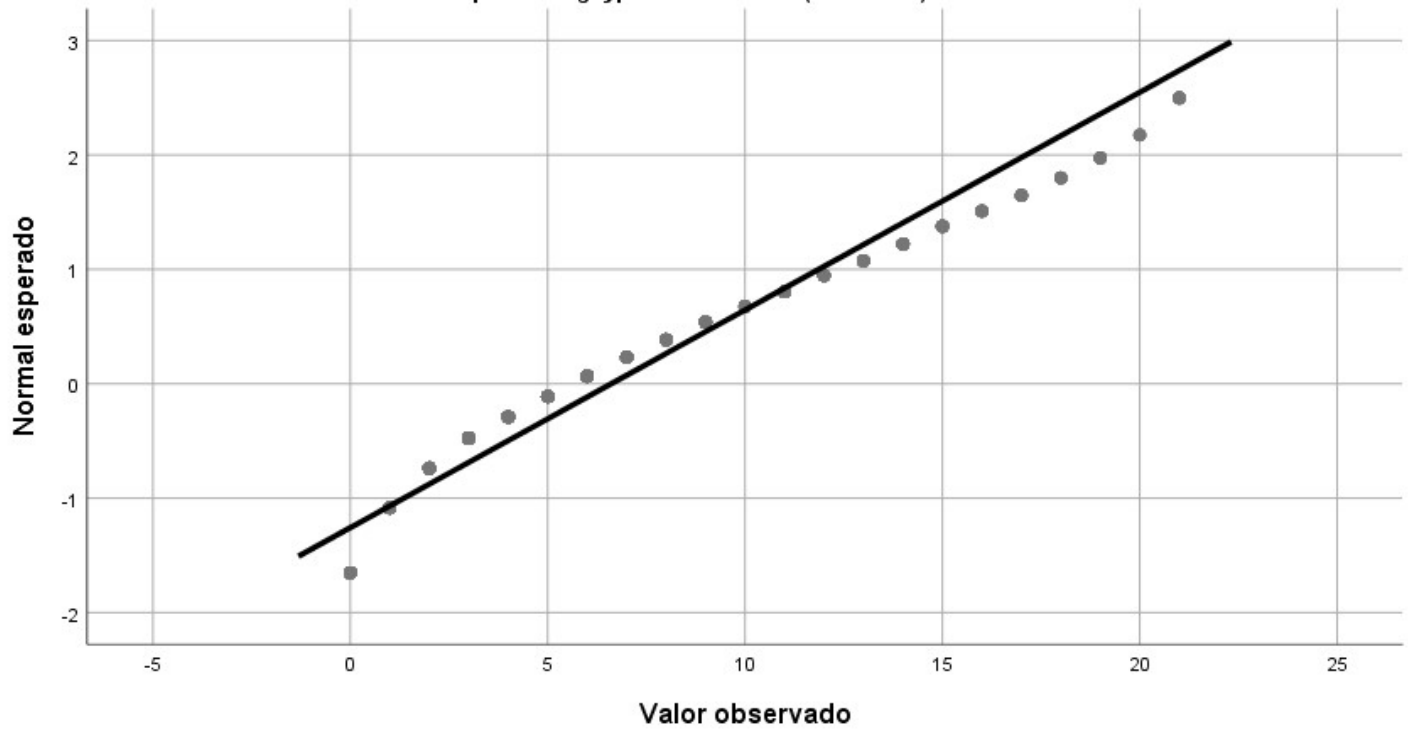

Gráfico Q-Q Normal de DASS21 Anxiety Score  
para RsPrgType= Medical

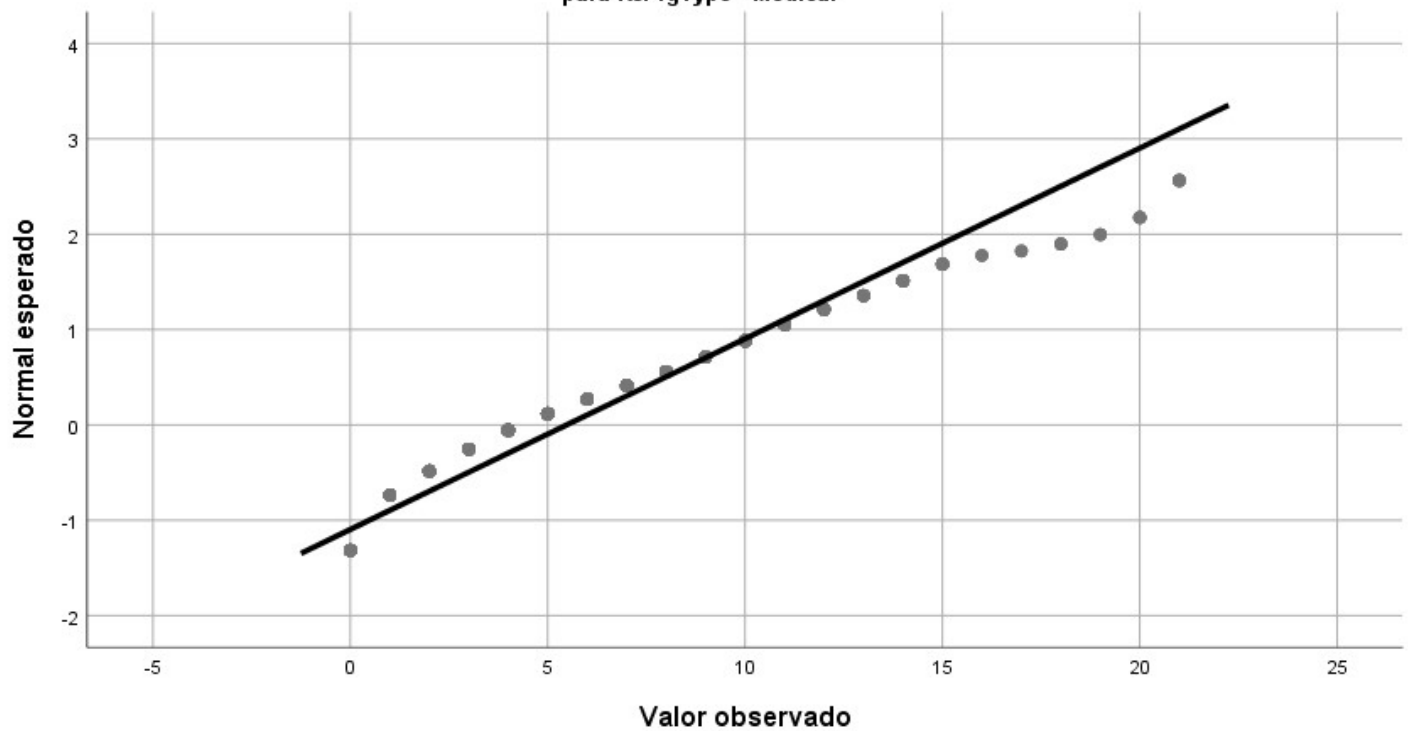

Gráfico Q-Q normais sem tendência

Gráfico Q-Q Normal sem Tendência de DASS21 Anxiety Score

para RsPrgType= Non-Medical (Other HCP)

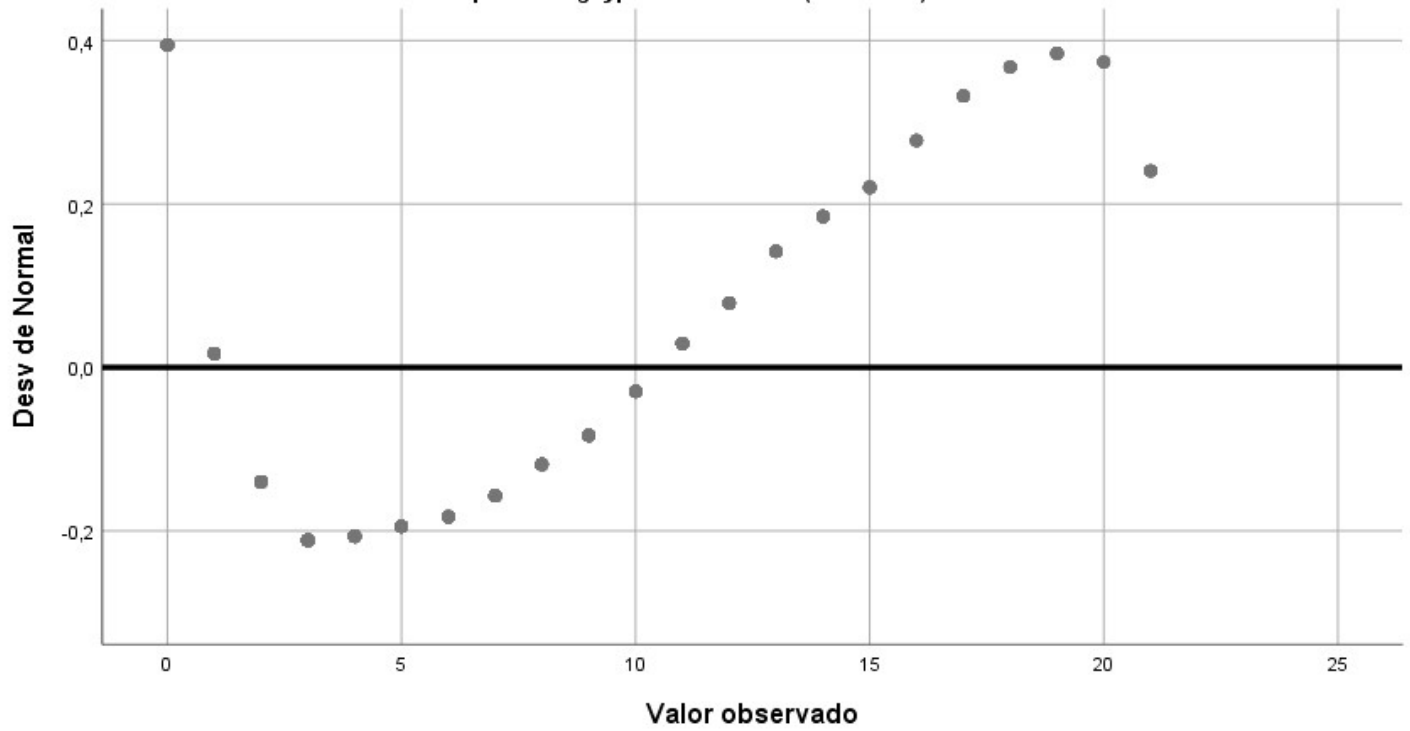

Gráfico Q-Q Normal sem Tendência de DASS21 Anxiety Score

para RsPrgType= Medical

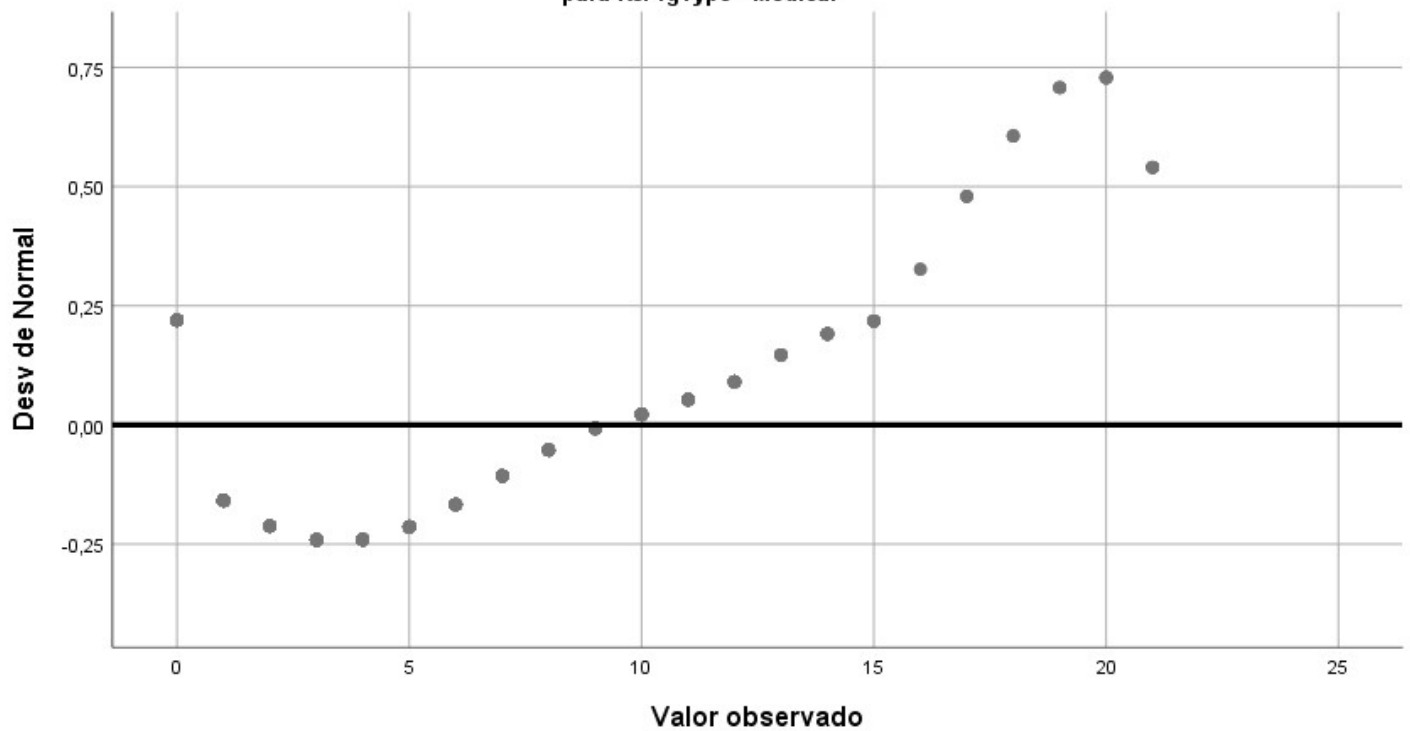

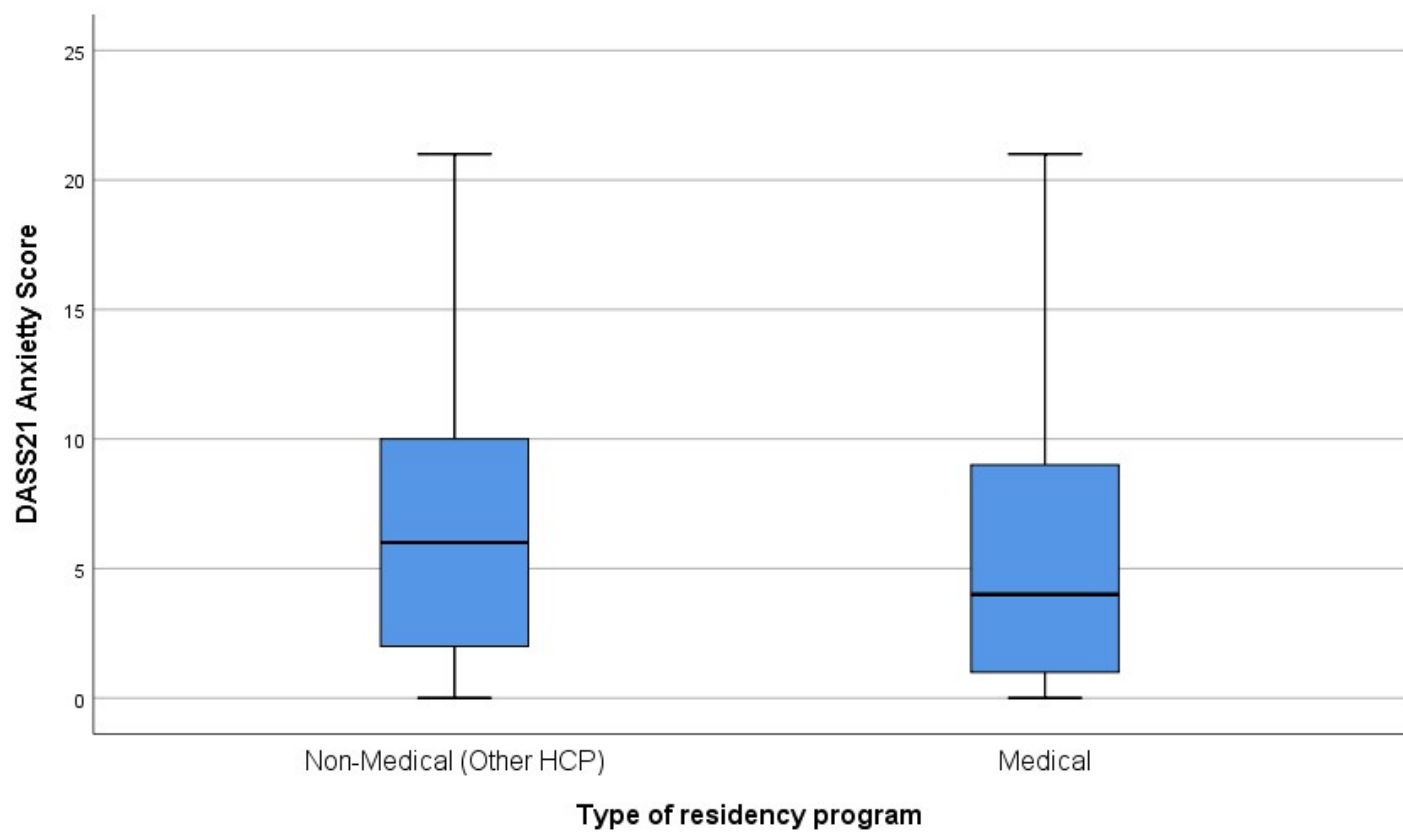

DASS21 Stress Score

Histogramas

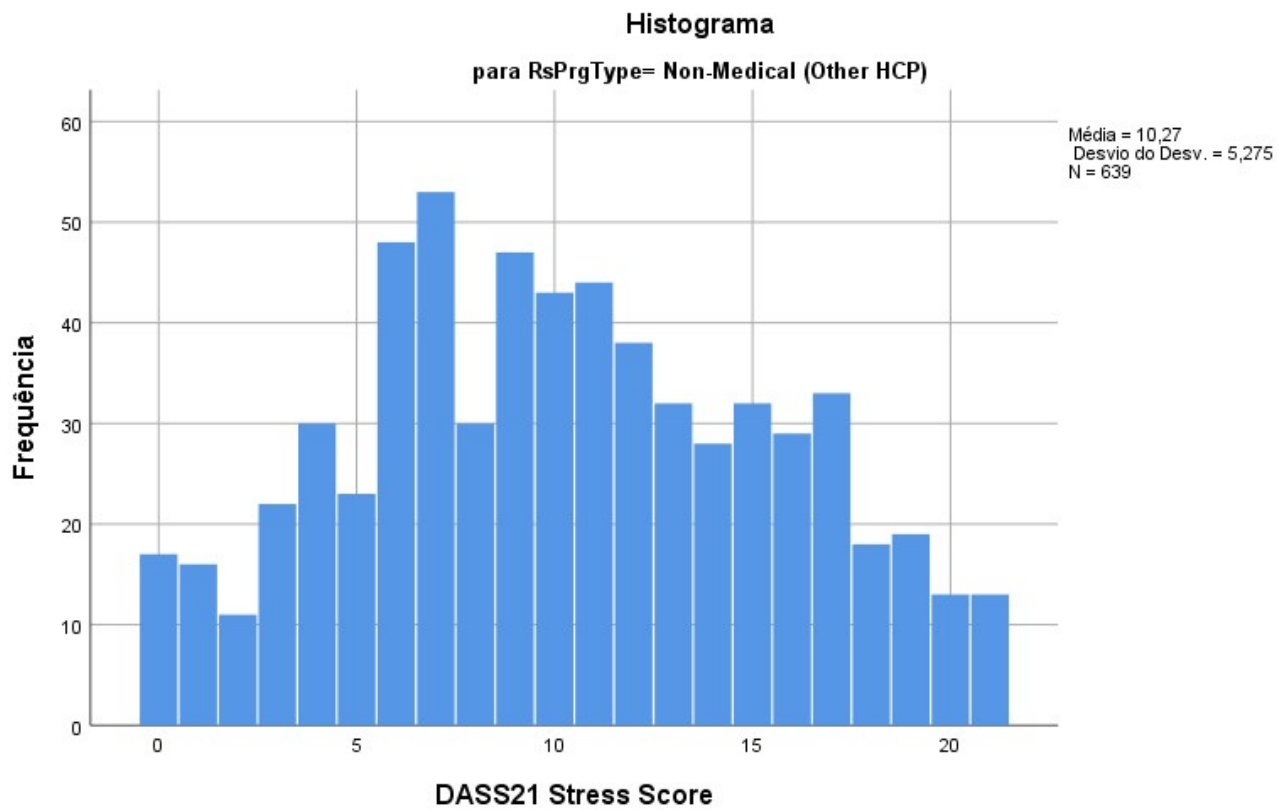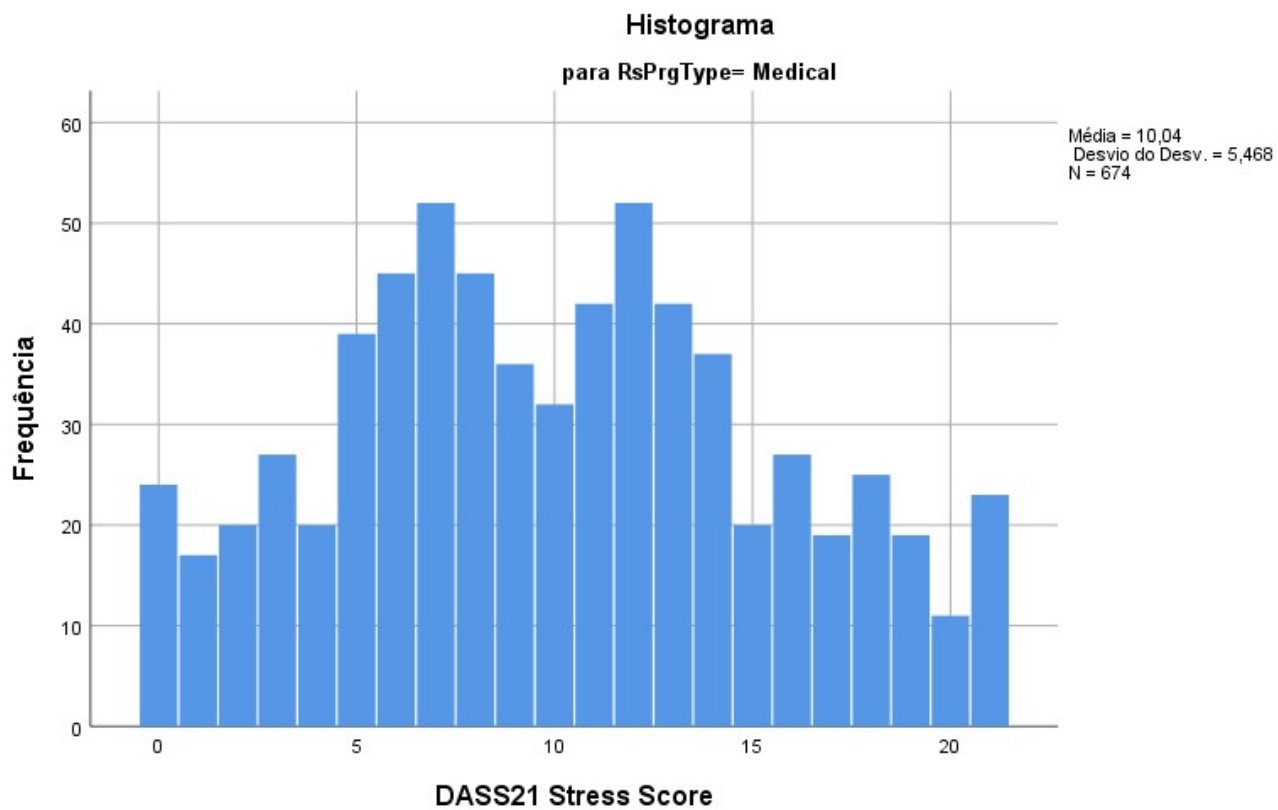

Gráfico Q-Q normais

Gráfico Q-Q Normal de DASS21 Stress Score

para RsPrgType= Non-Medical (Other HCP)

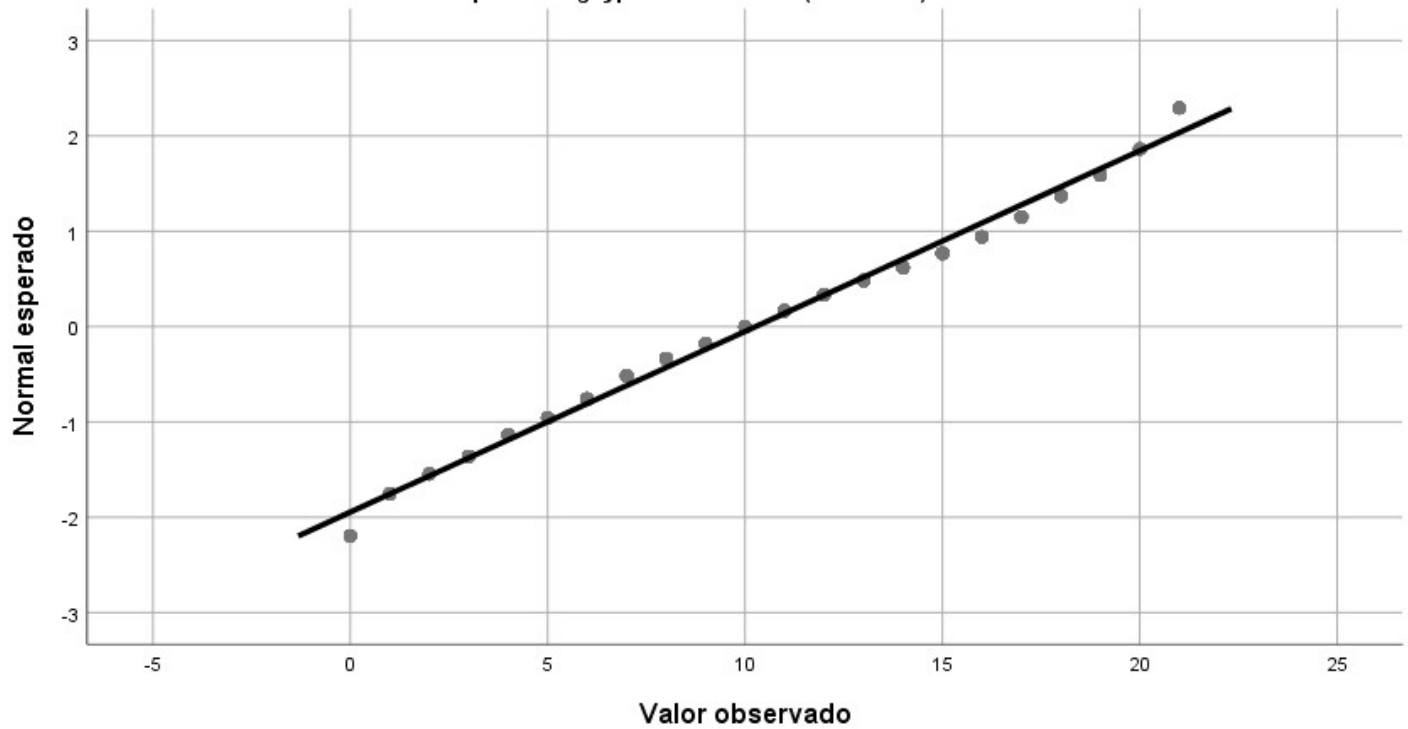

Gráfico Q-Q Normal de DASS21 Stress Score

para RsPrgType= Medical

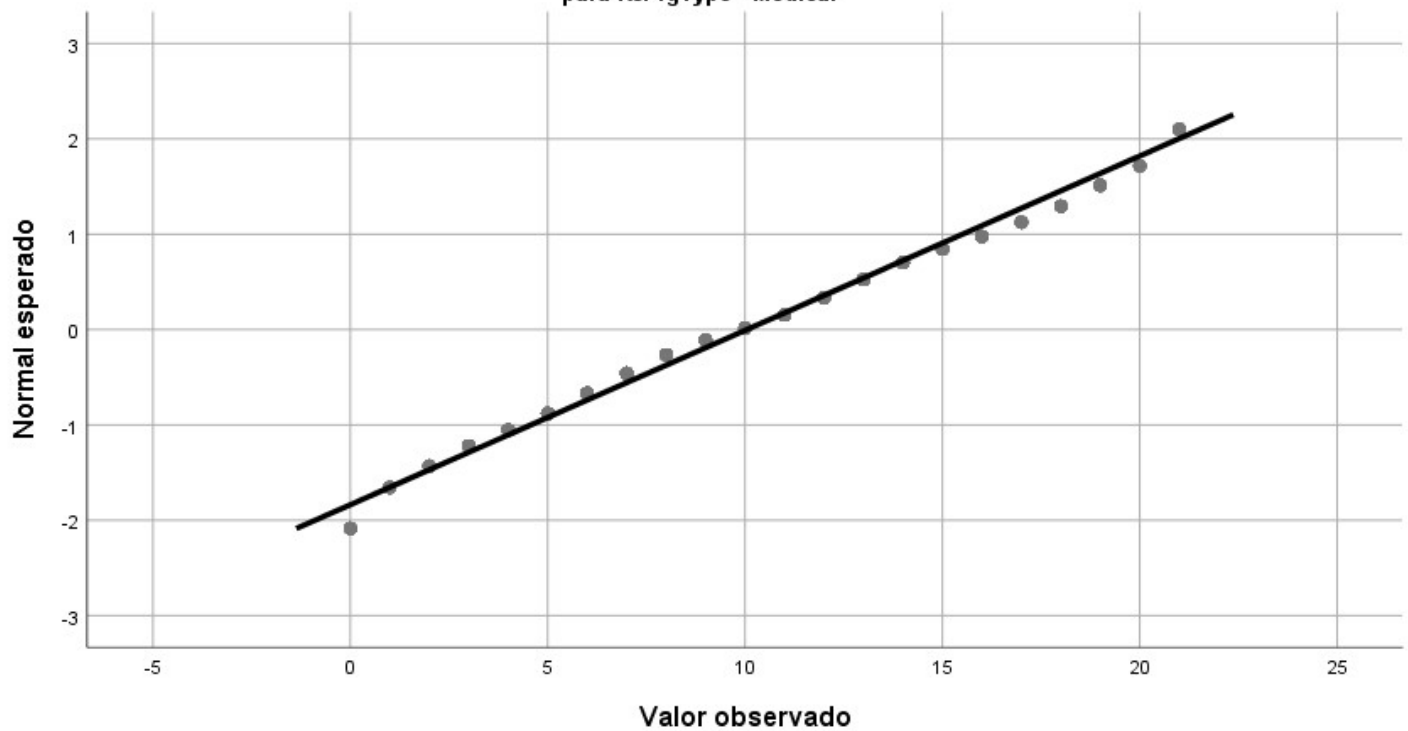

Gráfico Q-Q normais sem tendência

Gráfico Q-Q Normal sem Tendência de DASS21 Stress Score

para RsPrgType= Non-Medical (Other HCP)

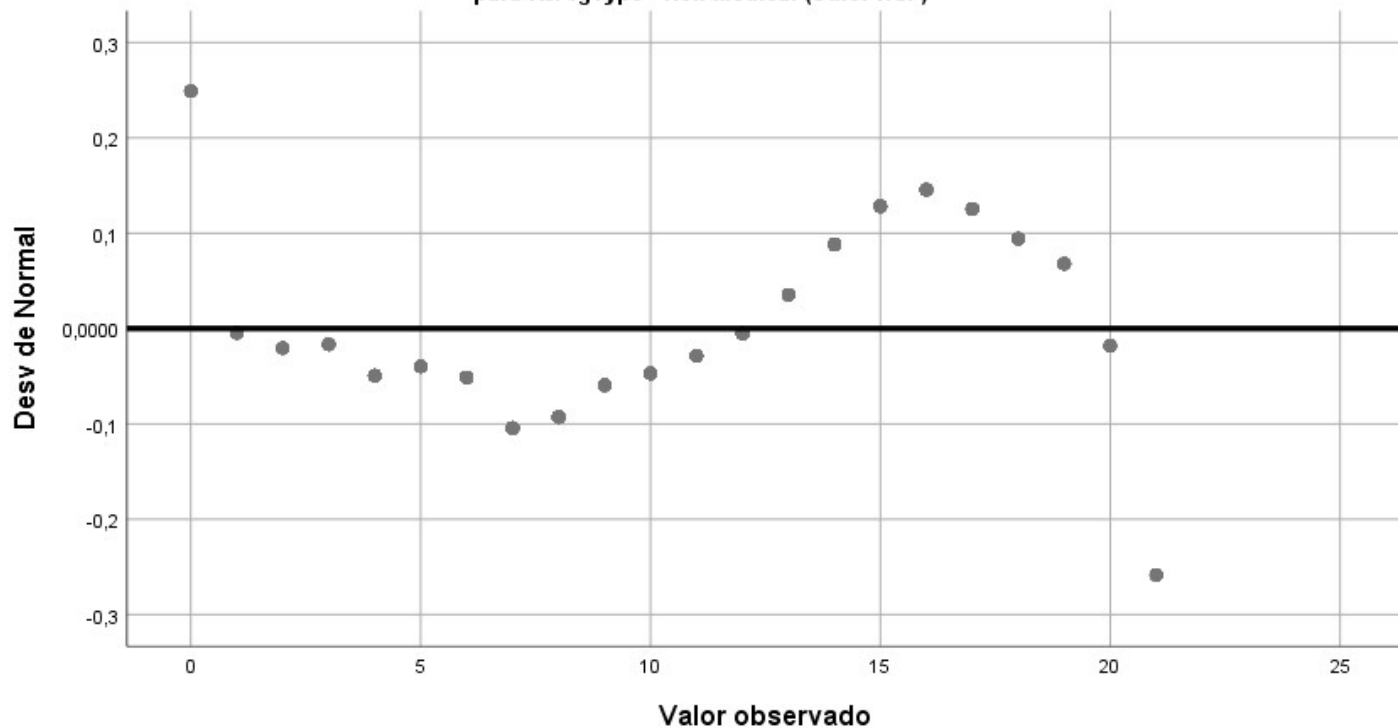

Gráfico Q-Q Normal sem Tendência de DASS21 Stress Score

para RsPrgType= Medical

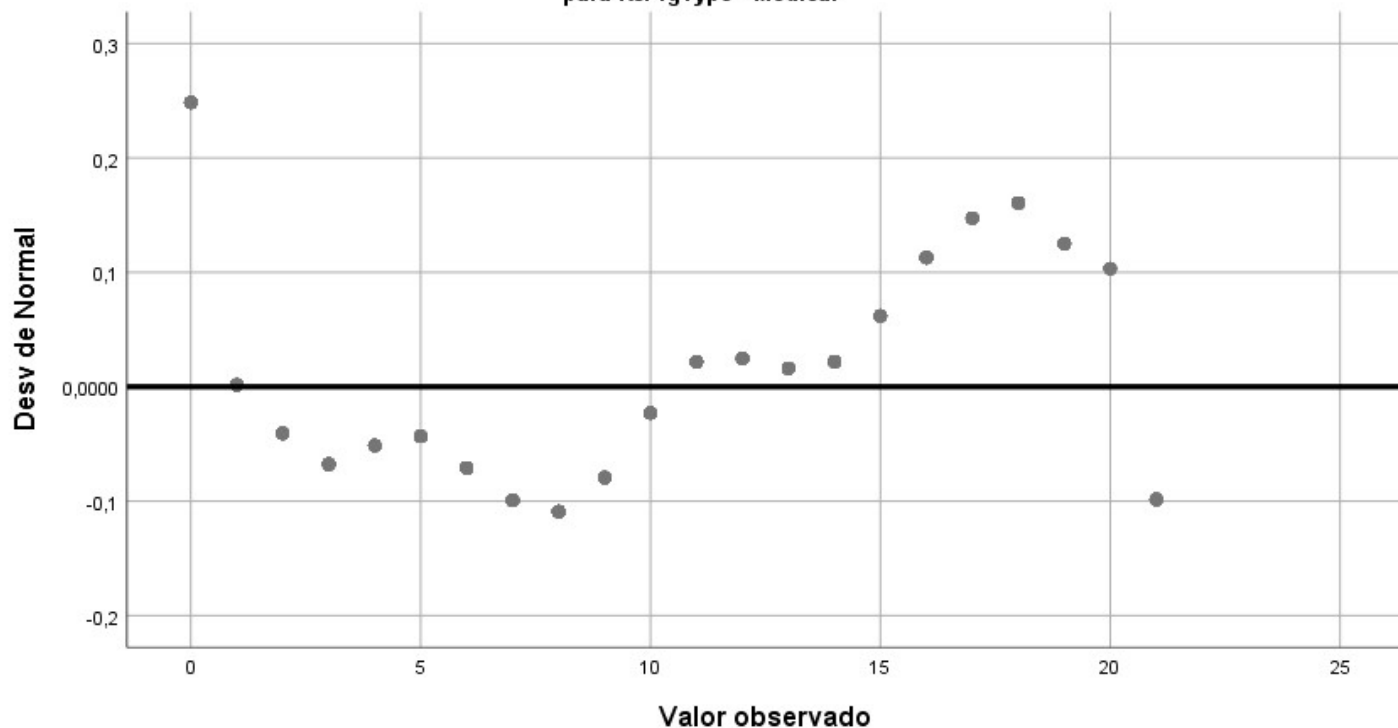

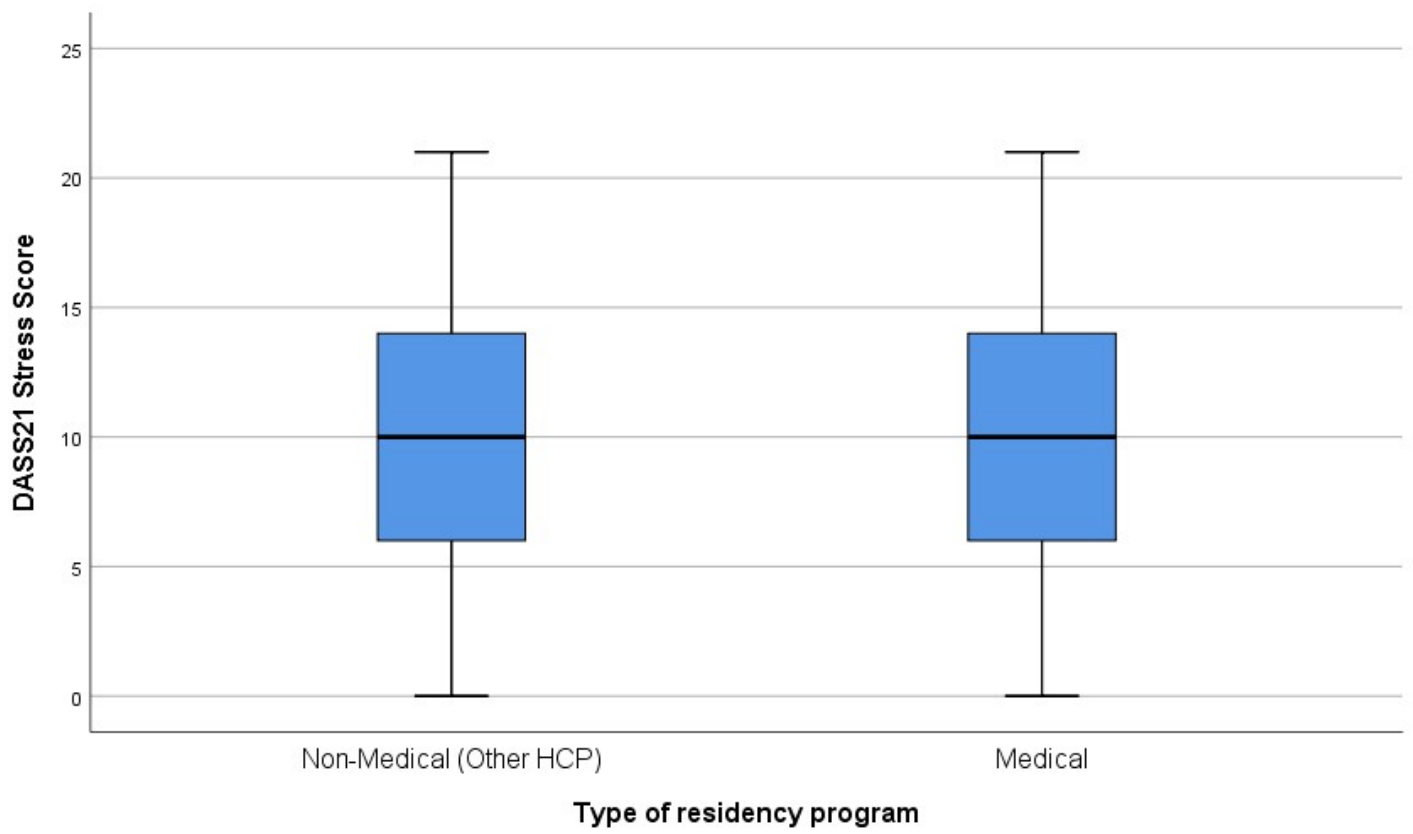

PHQ9 Depression Score

Histogramas

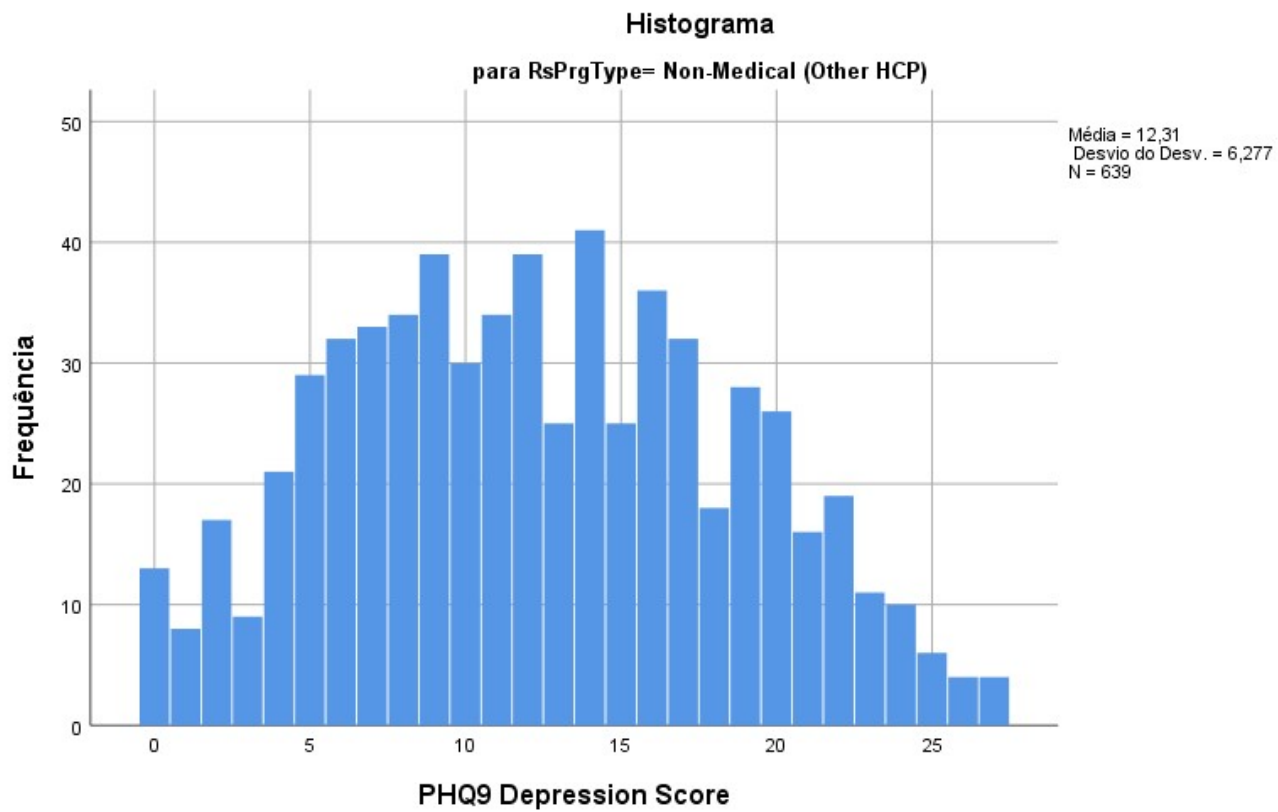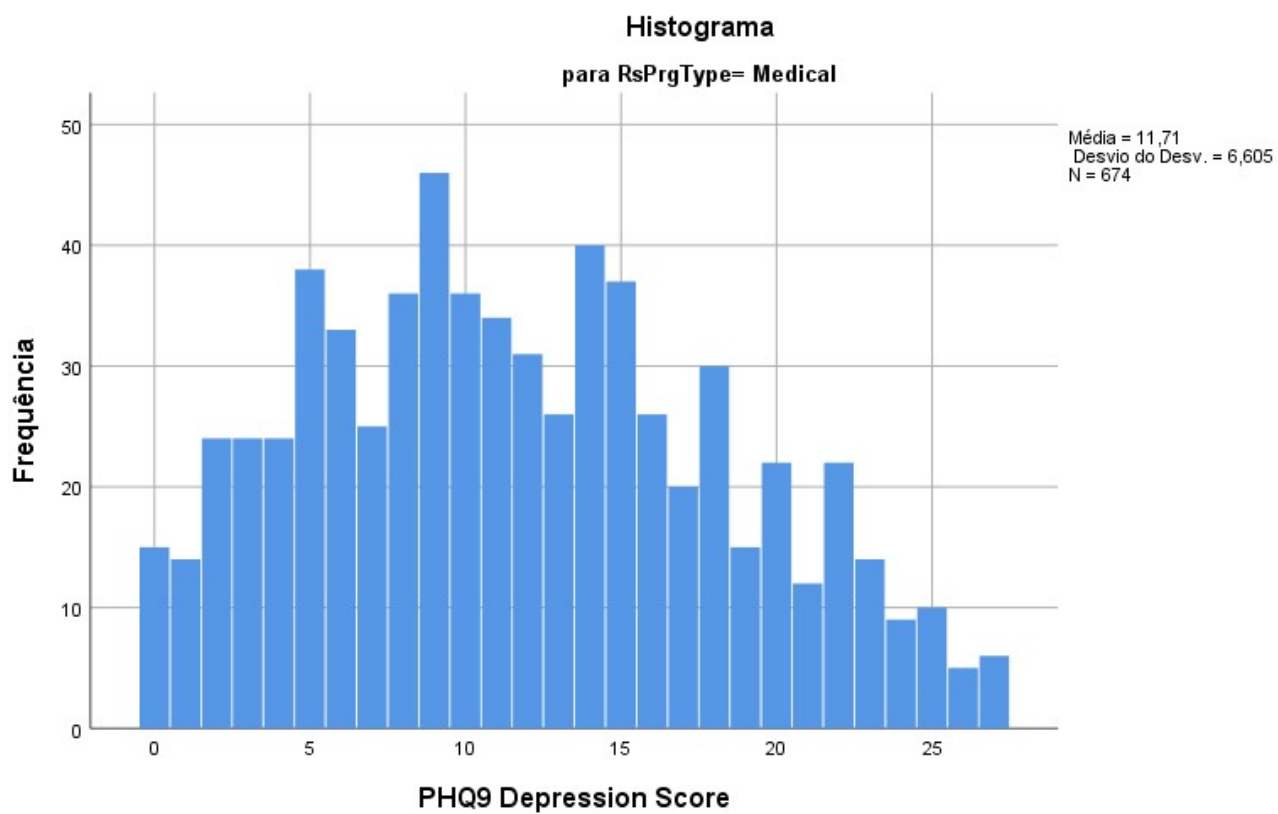

Gráfico Q-Q normais

Gráfico Q-Q Normal de PHQ9 Depression Score

para RsPrgType= Non-Medical (Other HCP)

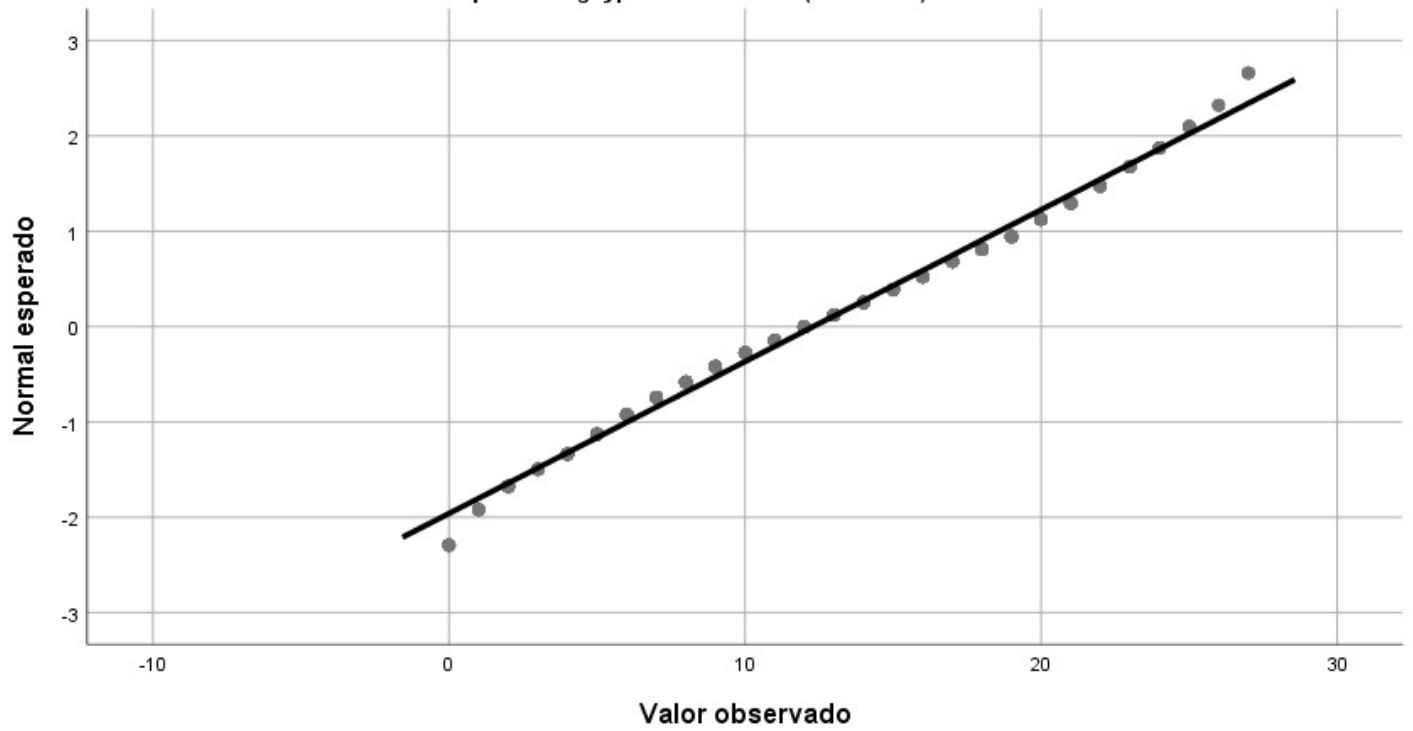

Gráfico Q-Q Normal de PHQ9 Depression Score

para RsPrgType= Medical

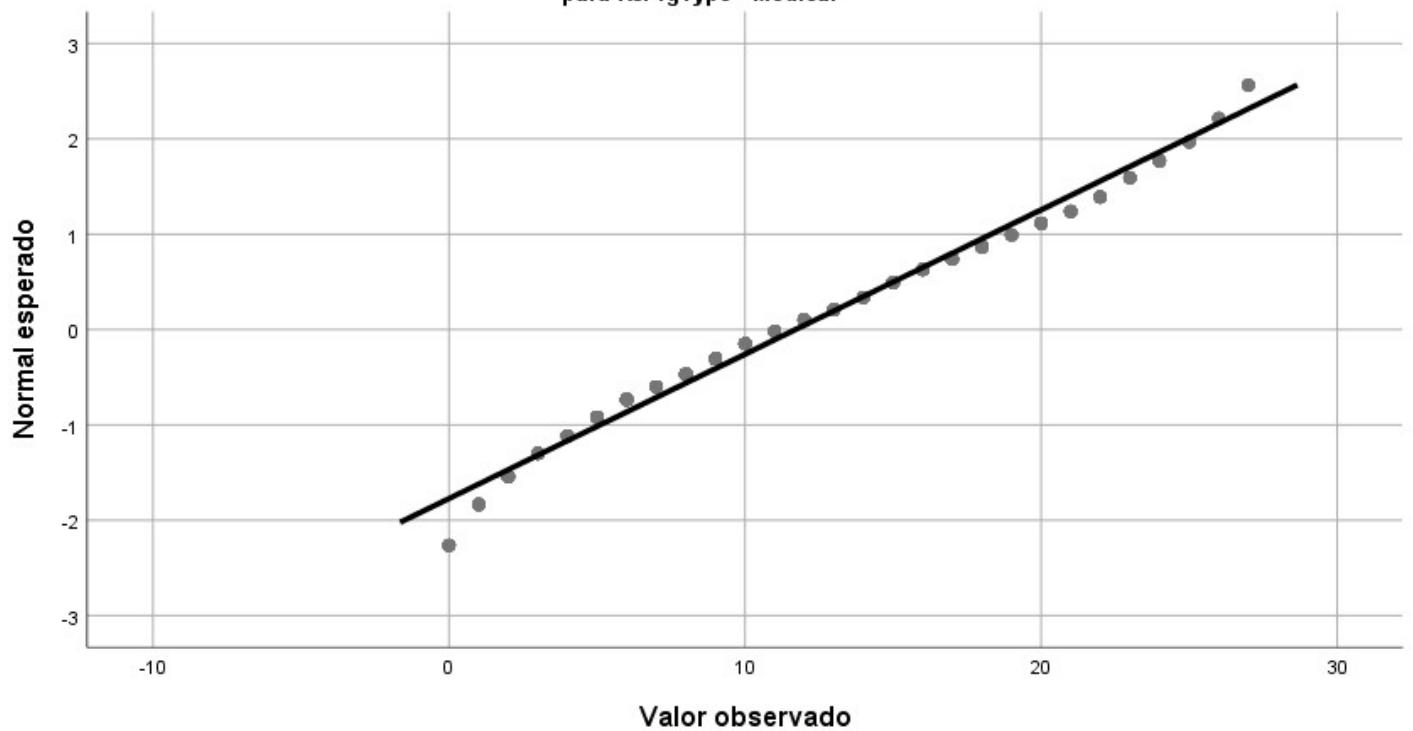

Gráfico Q-Q normais sem tendência

Gráfico Q-Q Normal sem Tendência de PHQ9 Depression Score

para RsPrgType= Non-Medical (Other HCP)

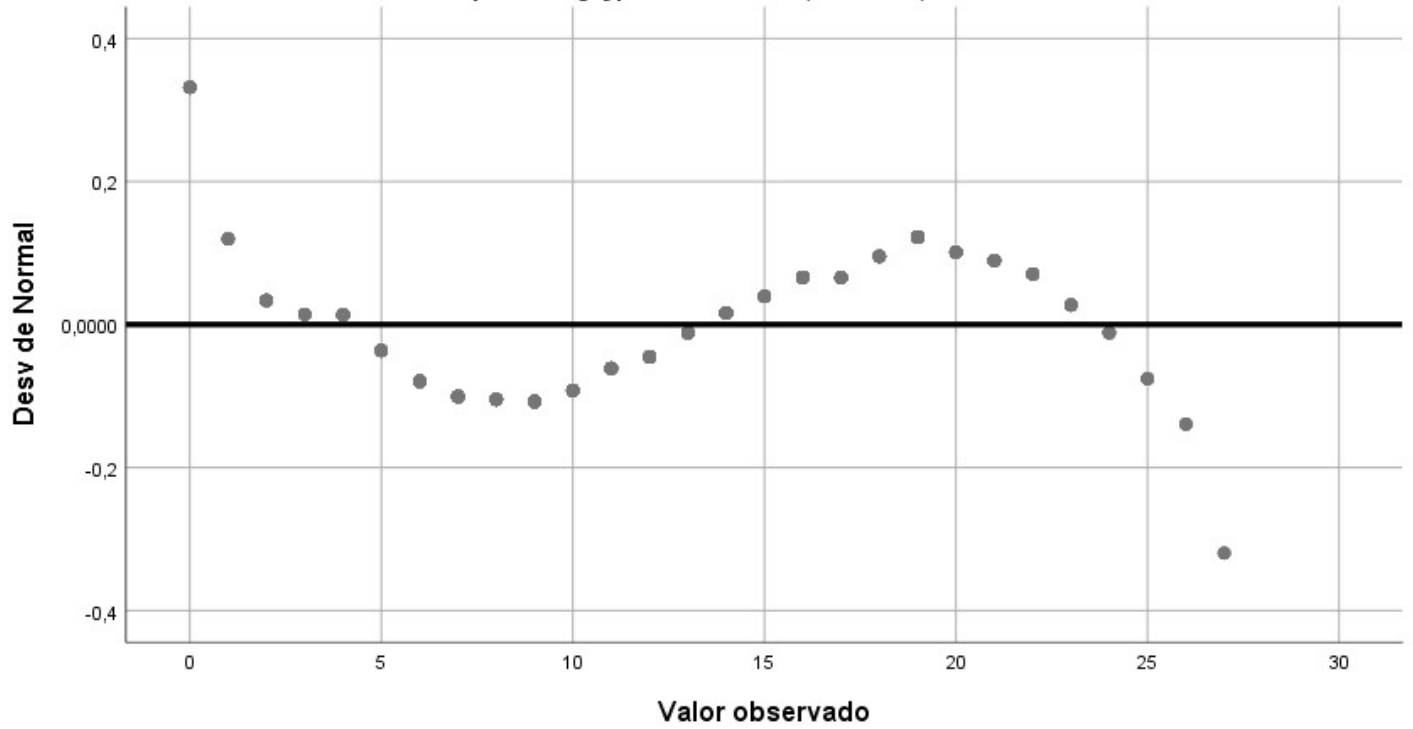

Gráfico Q-Q Normal sem Tendência de PHQ9 Depression Score

para RsPrgType= Medical

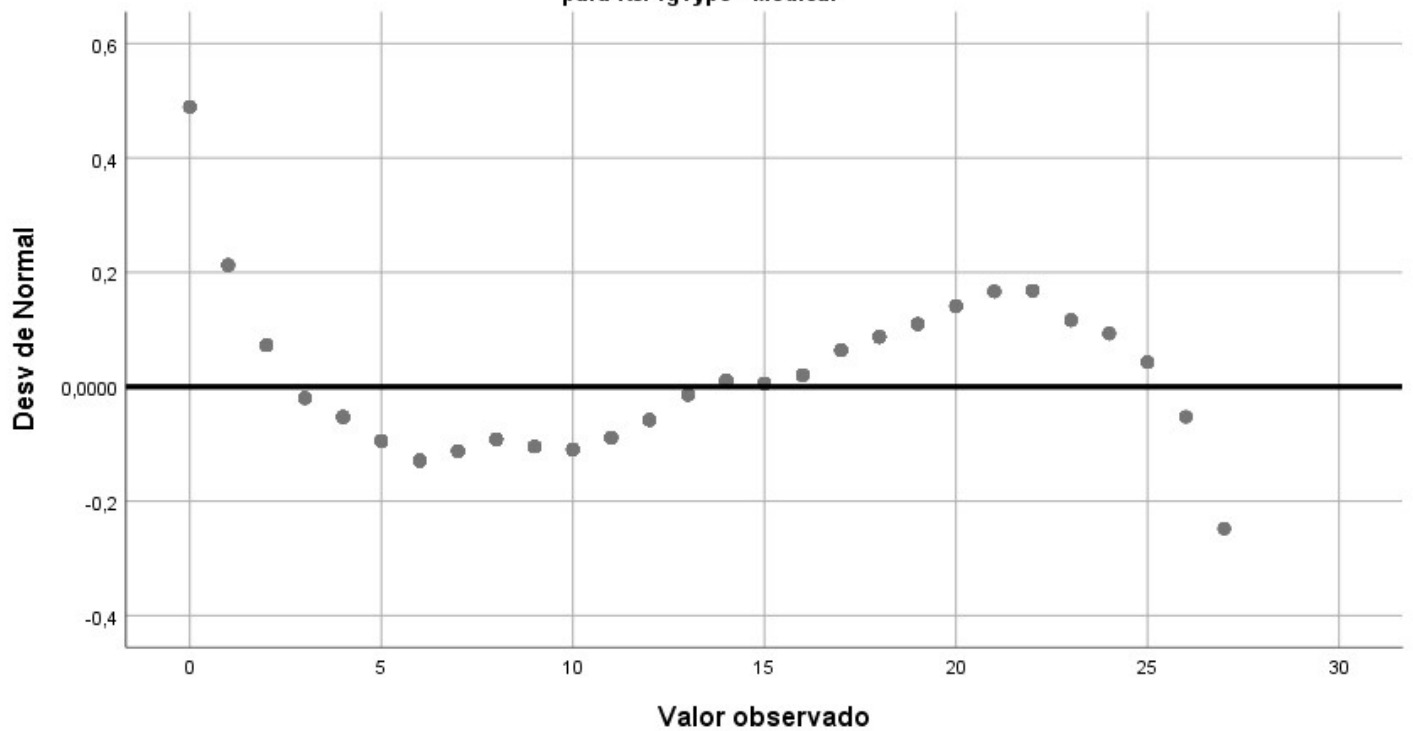

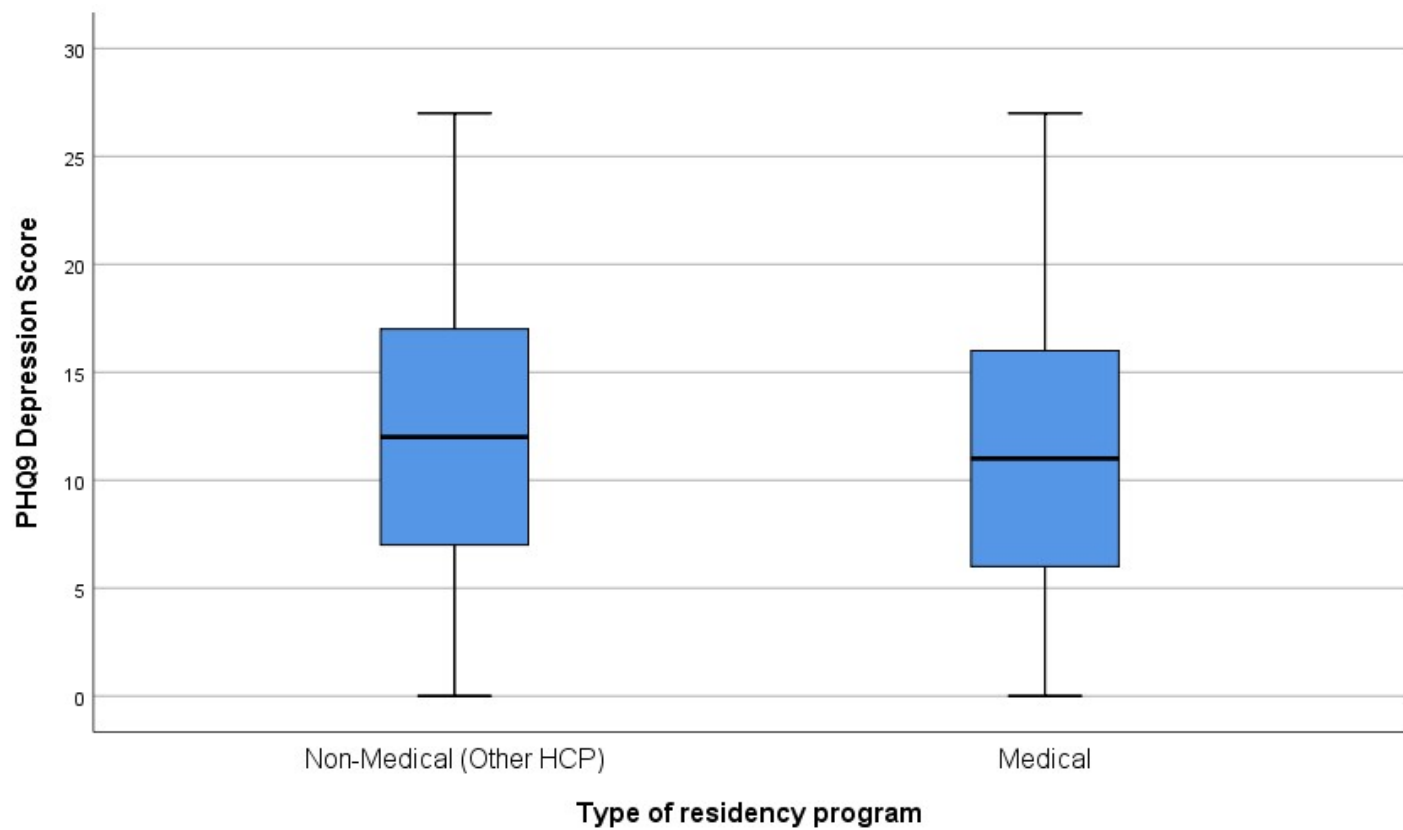

BRCS Score

Histogramas

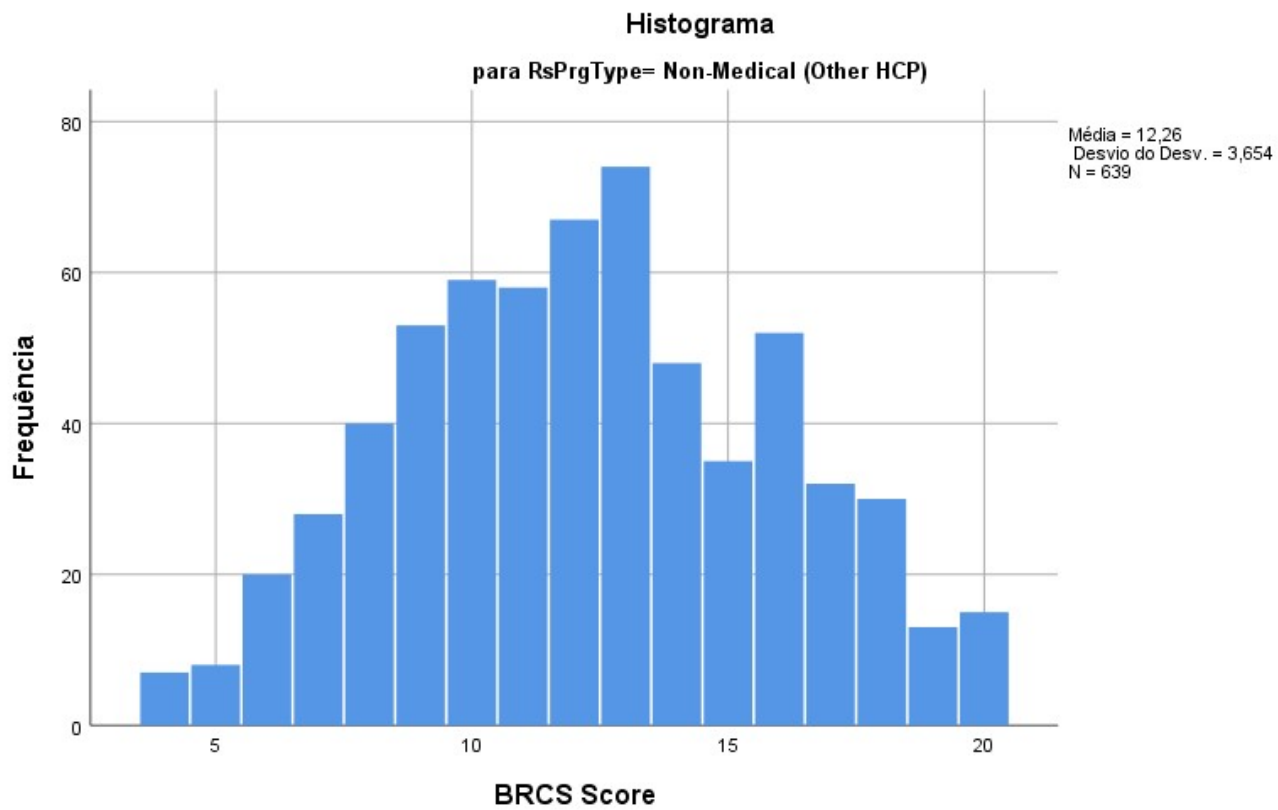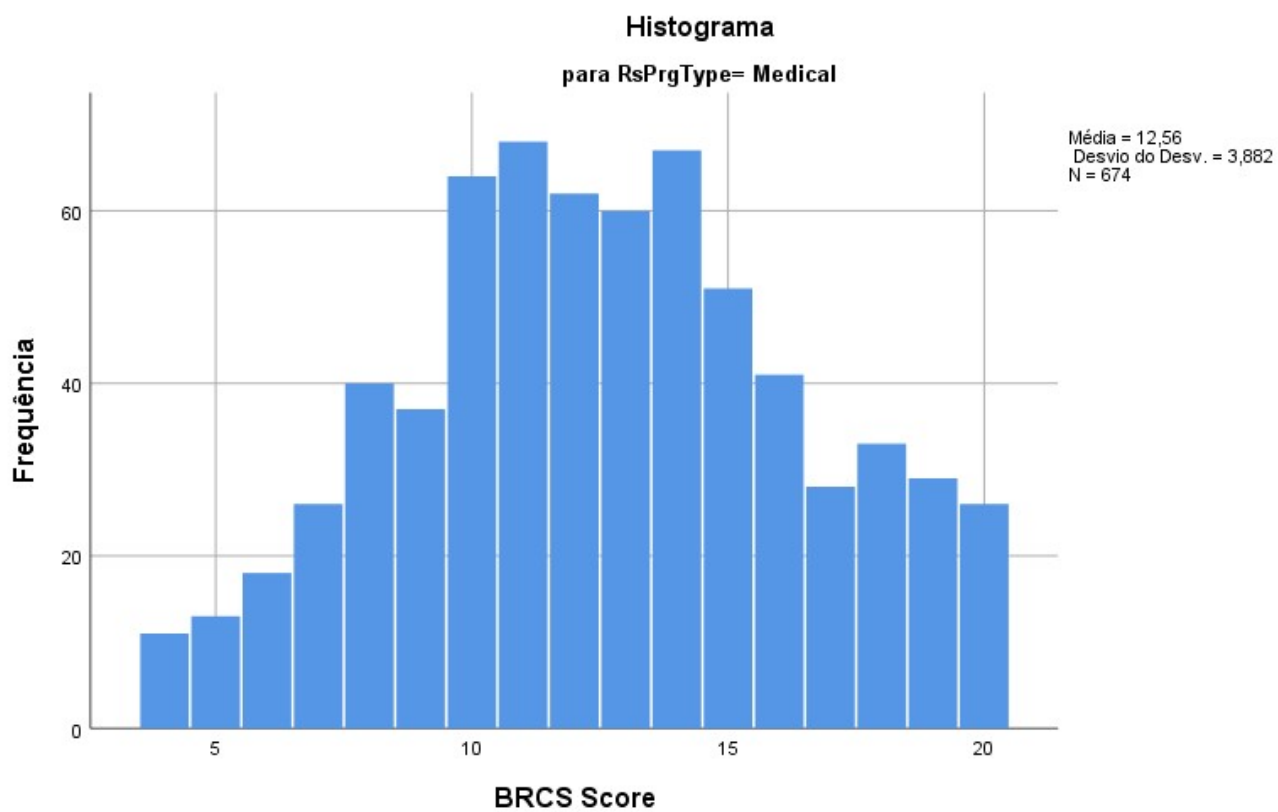

Gráfico Q-Q normais

Gráfico Q-Q Normal de BRCS Score  
para RsPrgType= Non-Medical (Other HCP)

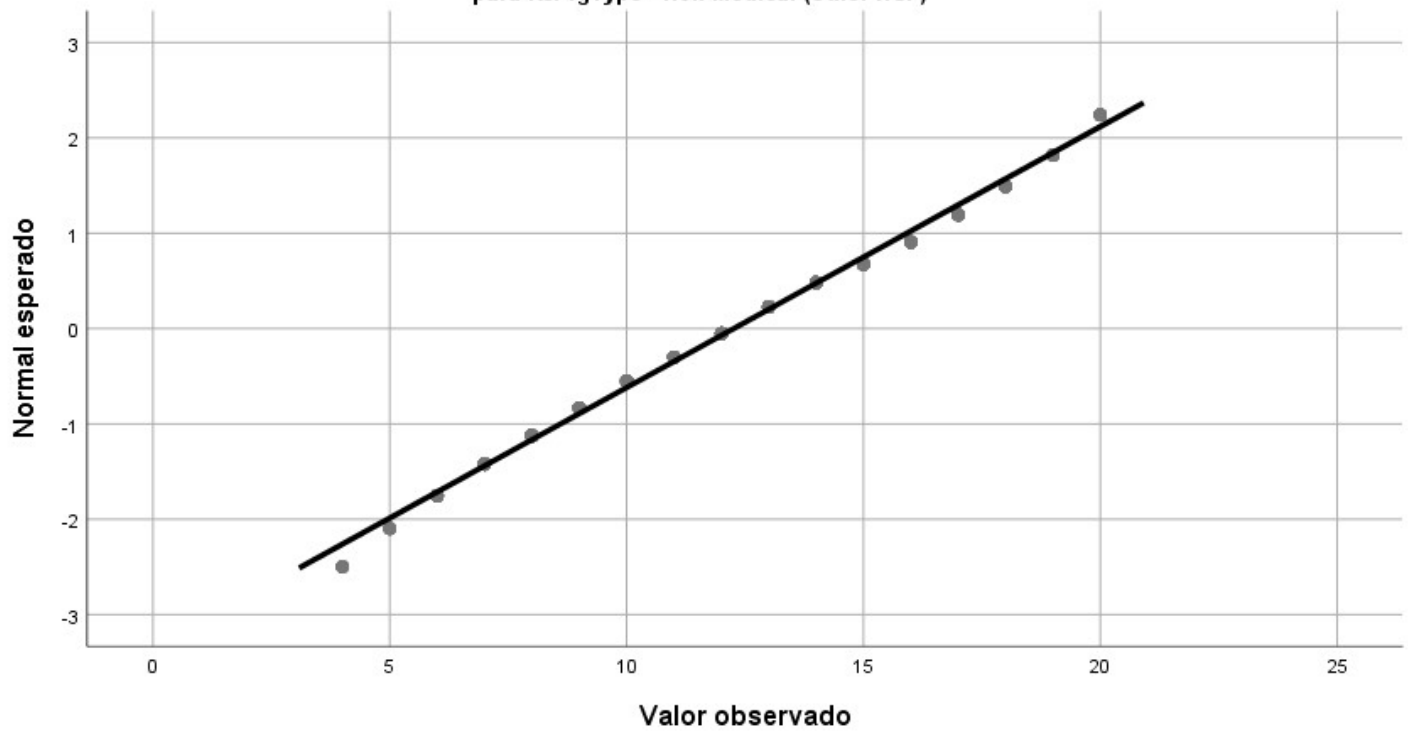

Gráfico Q-Q Normal de BRCS Score  
para RsPrgType= Medical

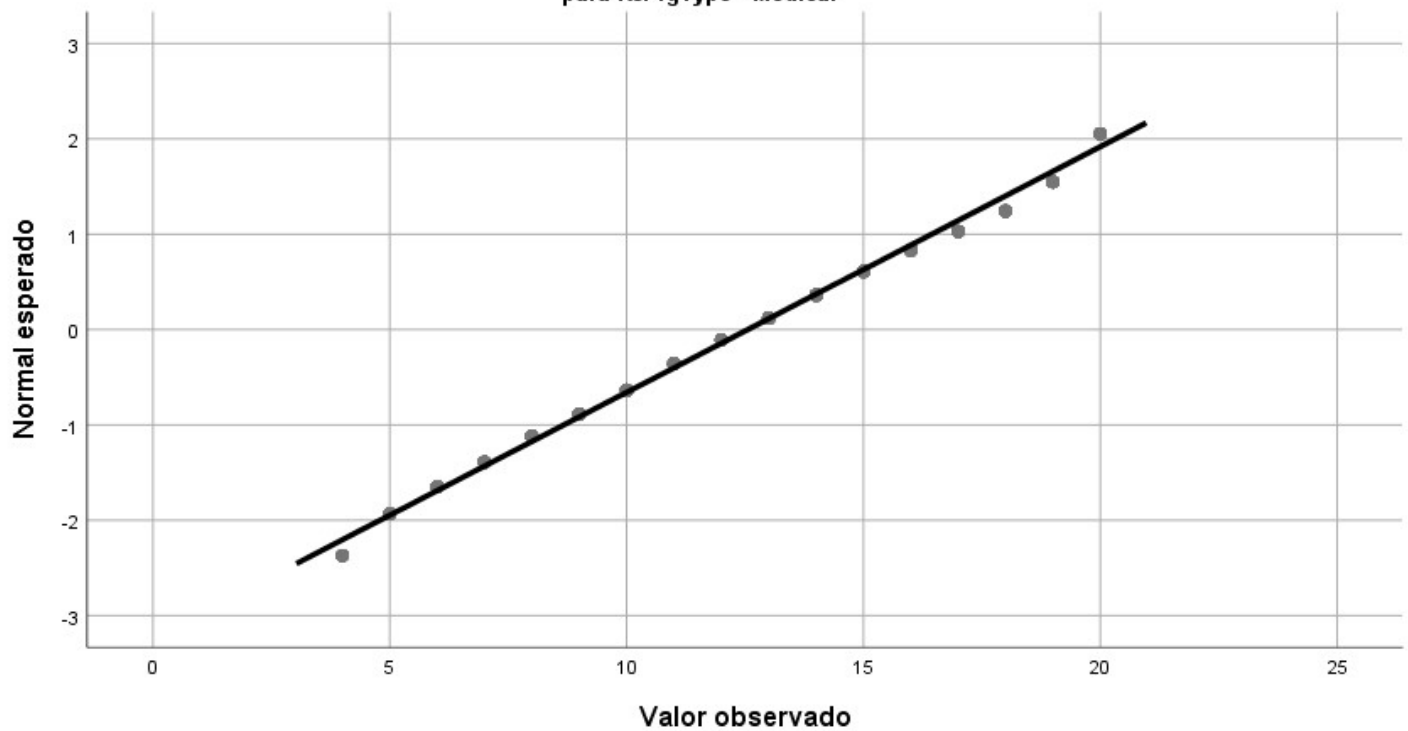

Gráfico Q-Q normais sem tendência

Gráfico Q-Q Normal sem Tendência de BRCS Score  
para RsPrgType= Non-Medical (Other HCP)

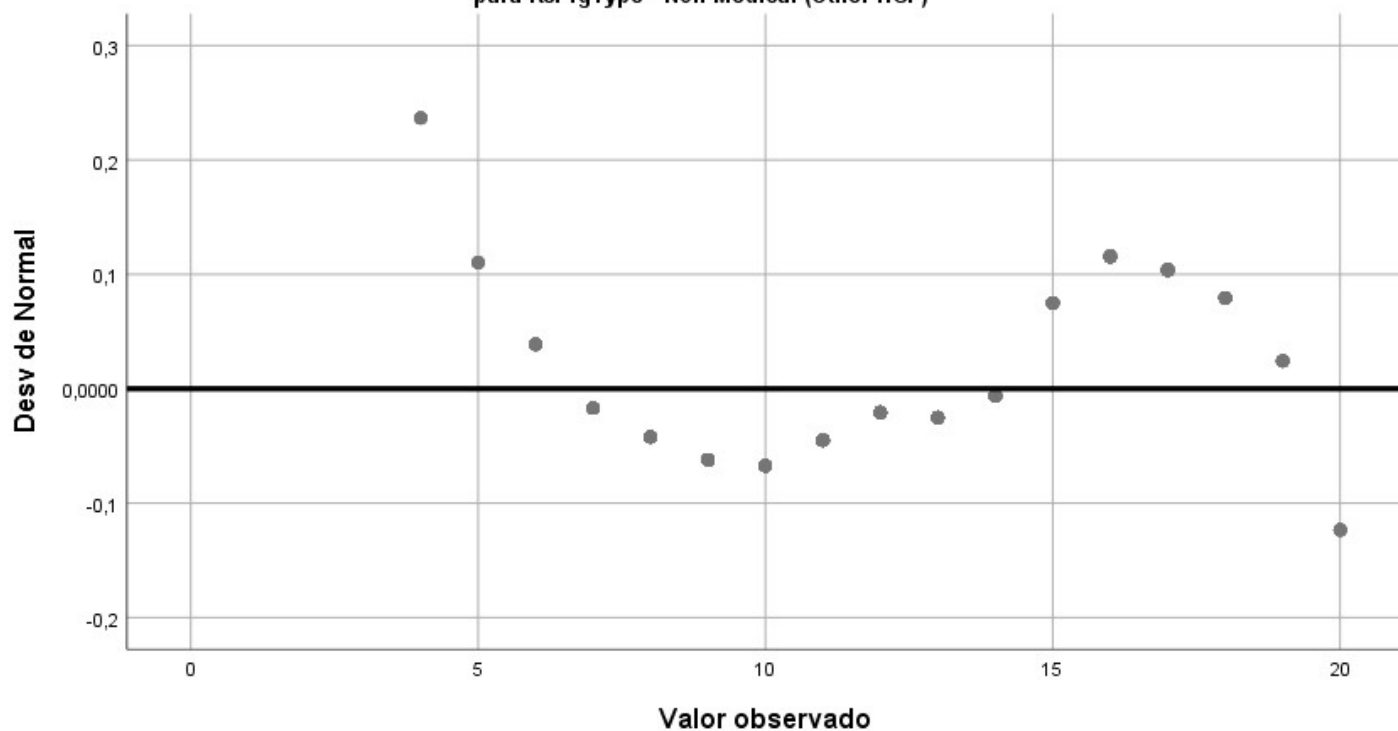

Gráfico Q-Q Normal sem Tendência de BRCS Score  
para RsPrgType= Medical

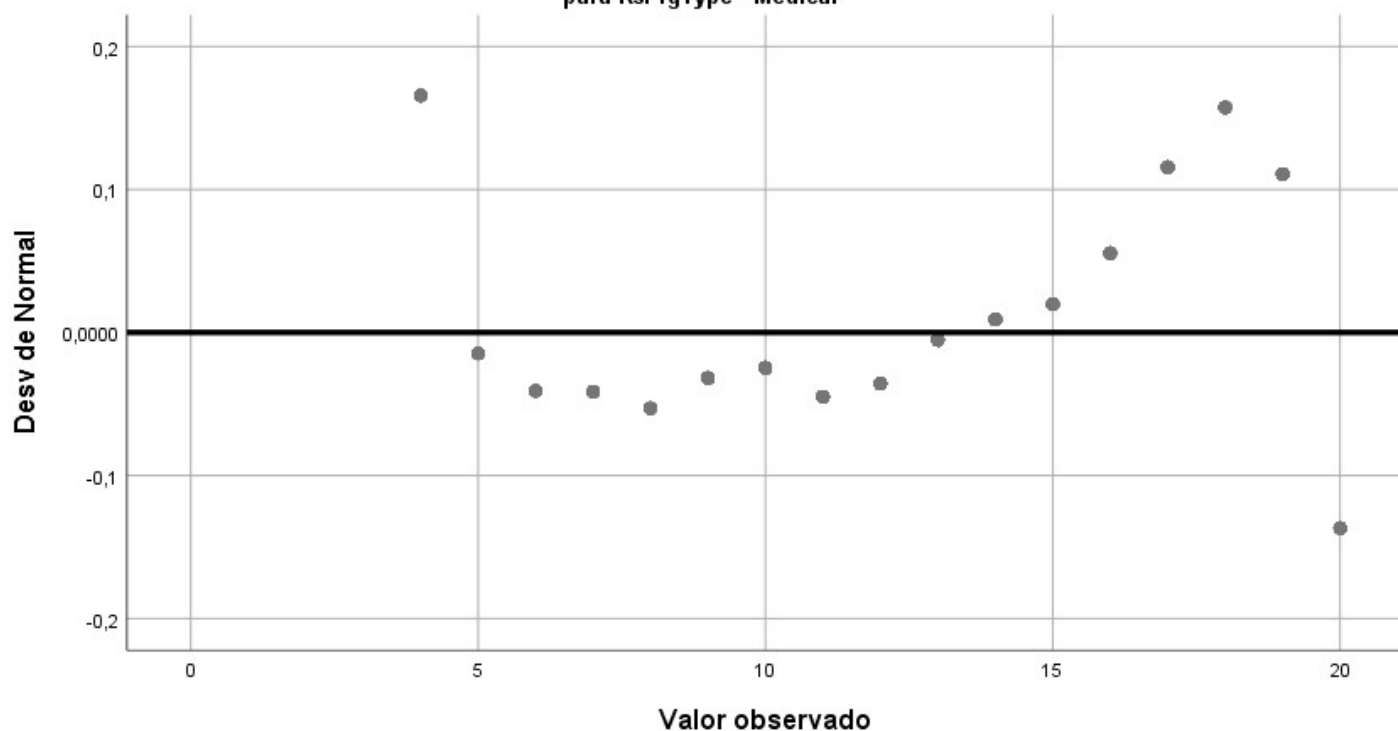

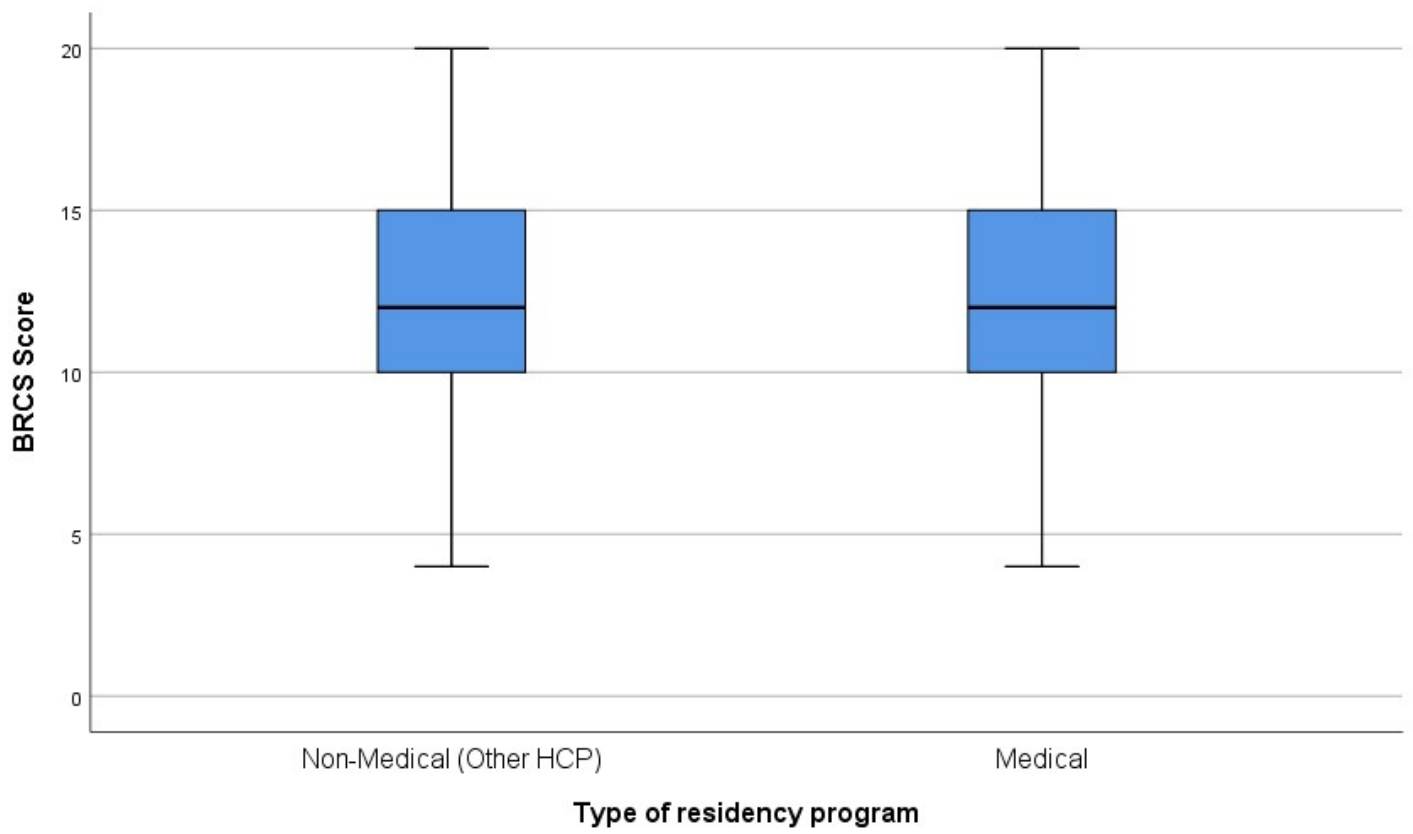

OLBI Disengagement Score

Histogramas

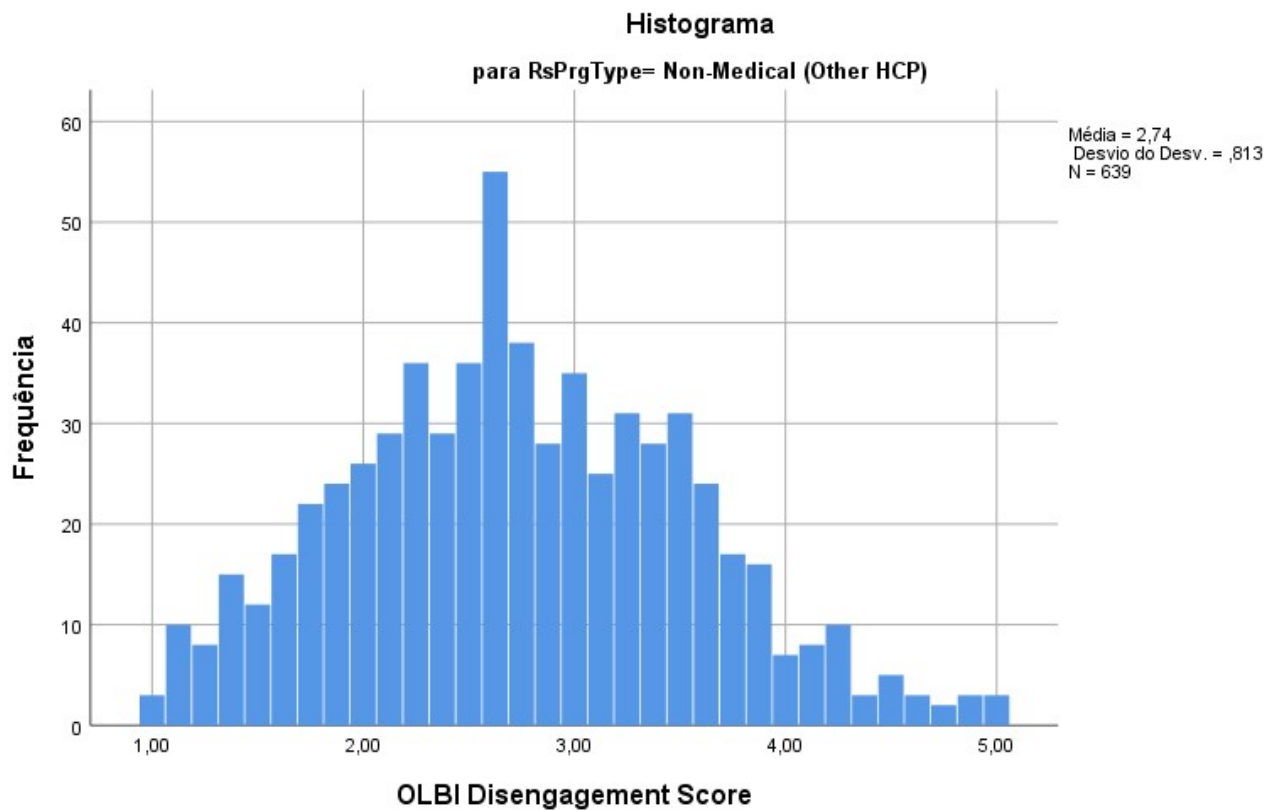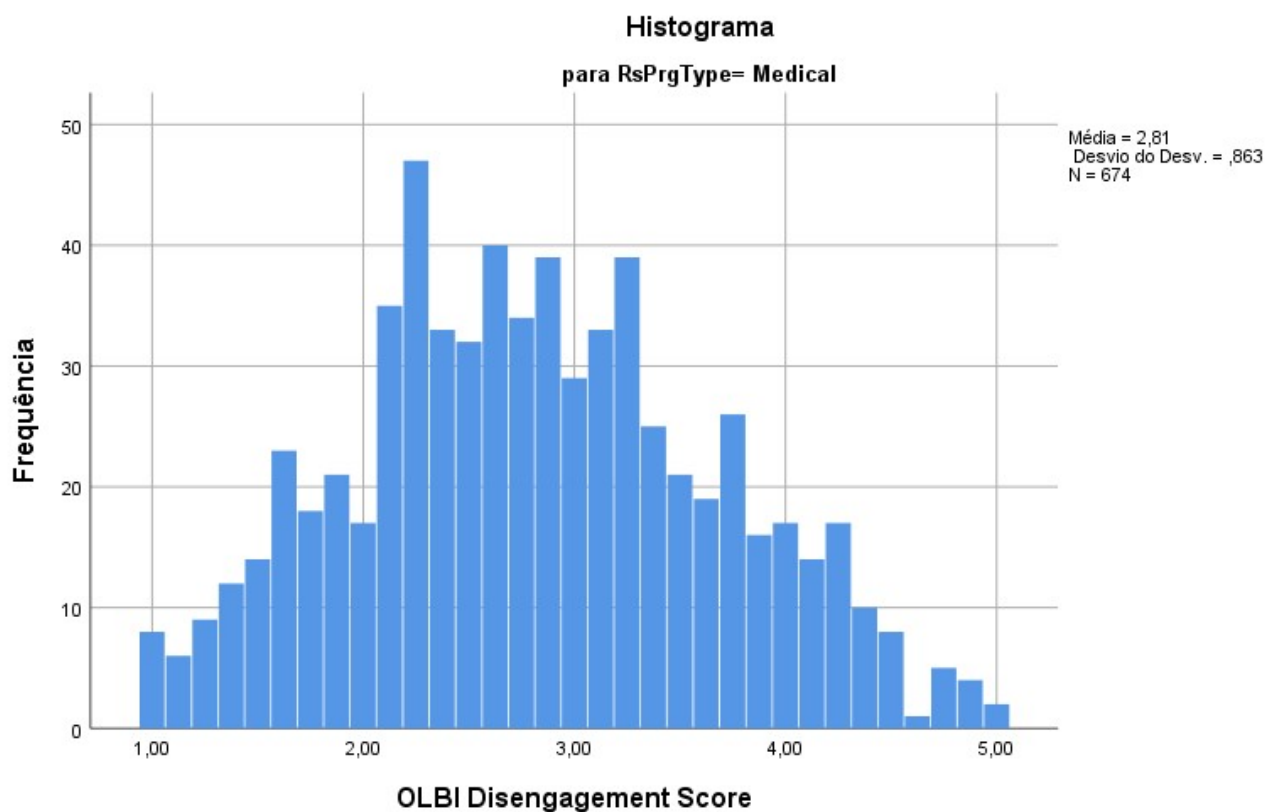

Gráfico Q-Q normais

Gráfico Q-Q Normal de OLBI Disengagement Score

para RsPrgType= Non-Medical (Other HCP)

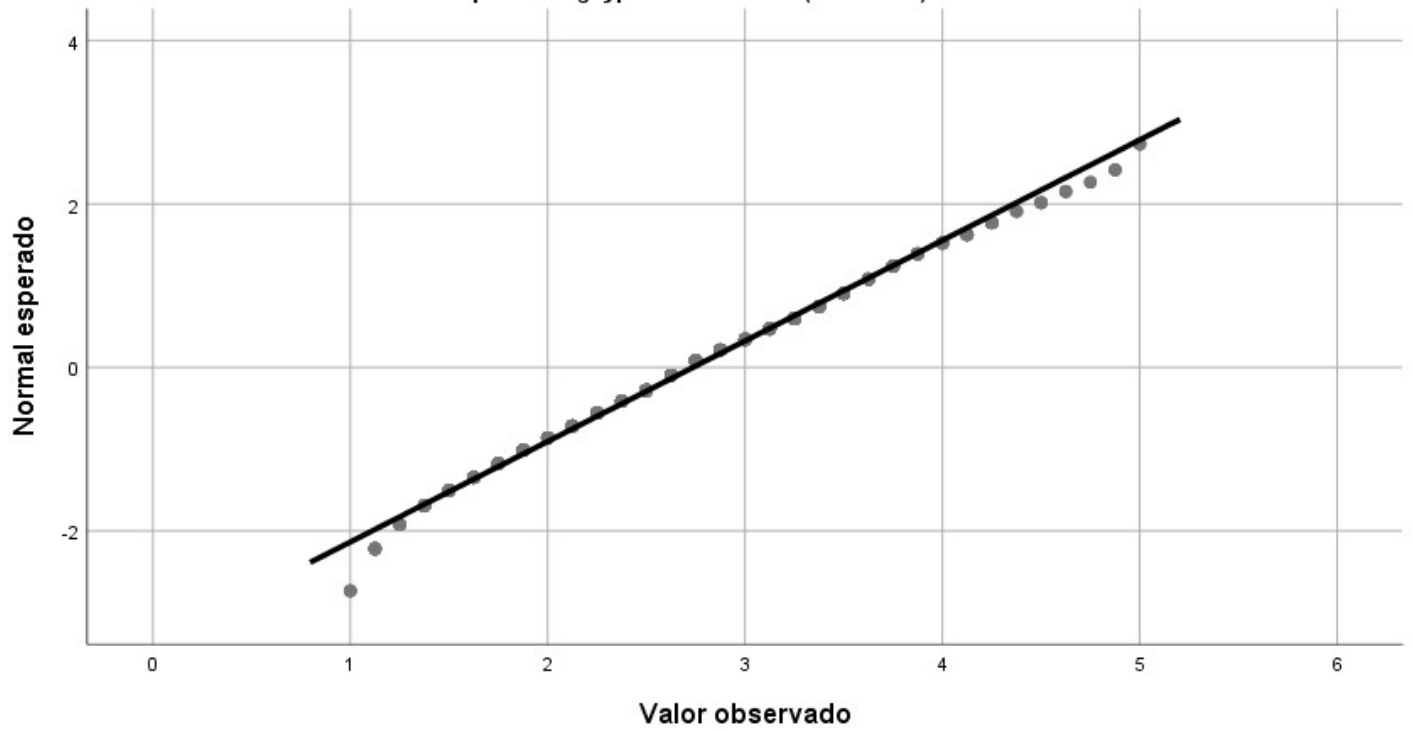

Gráfico Q-Q Normal de OLBI Disengagement Score

para RsPrgType= Medical

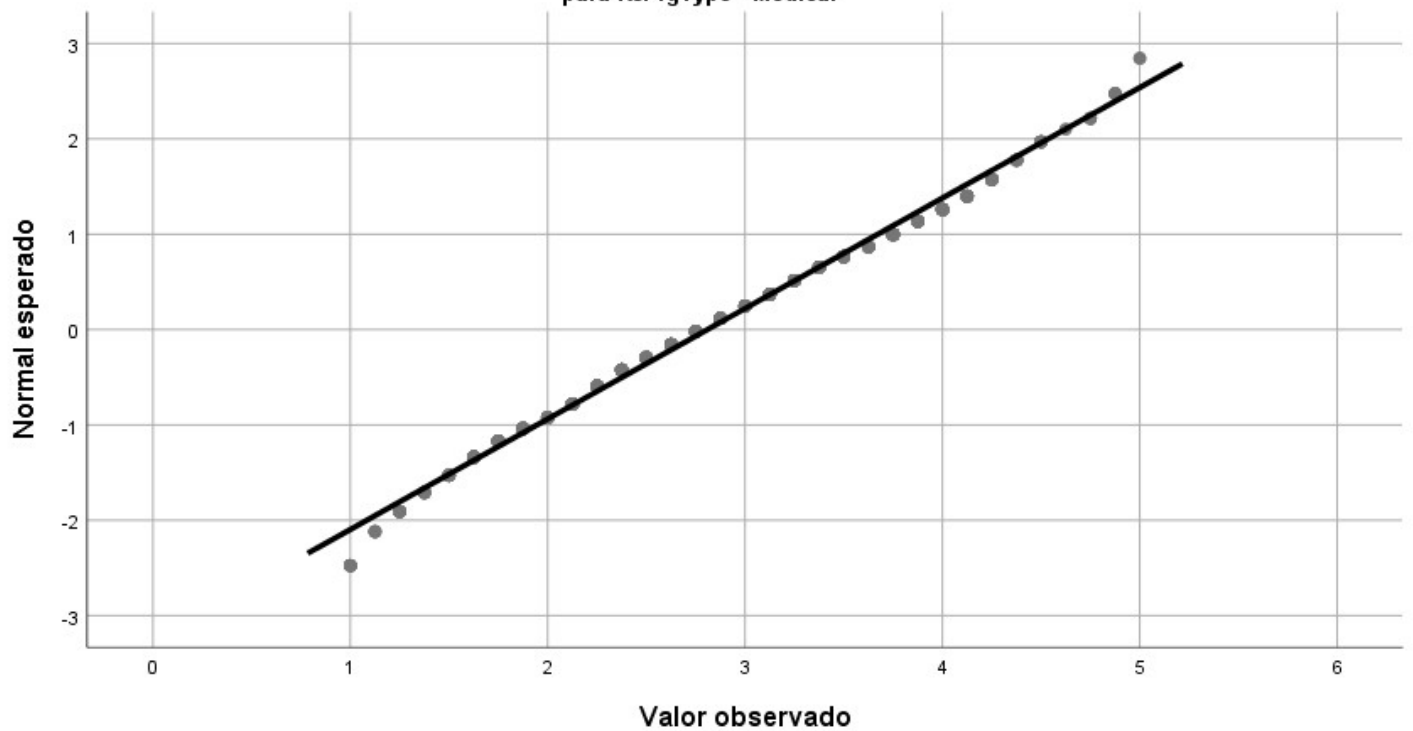

Gráfico Q-Q normais sem tendência

Gráfico Q-Q Normal sem Tendência de OLBI Disengagement Score

para RsPrgType= Non-Medical (Other HCP)

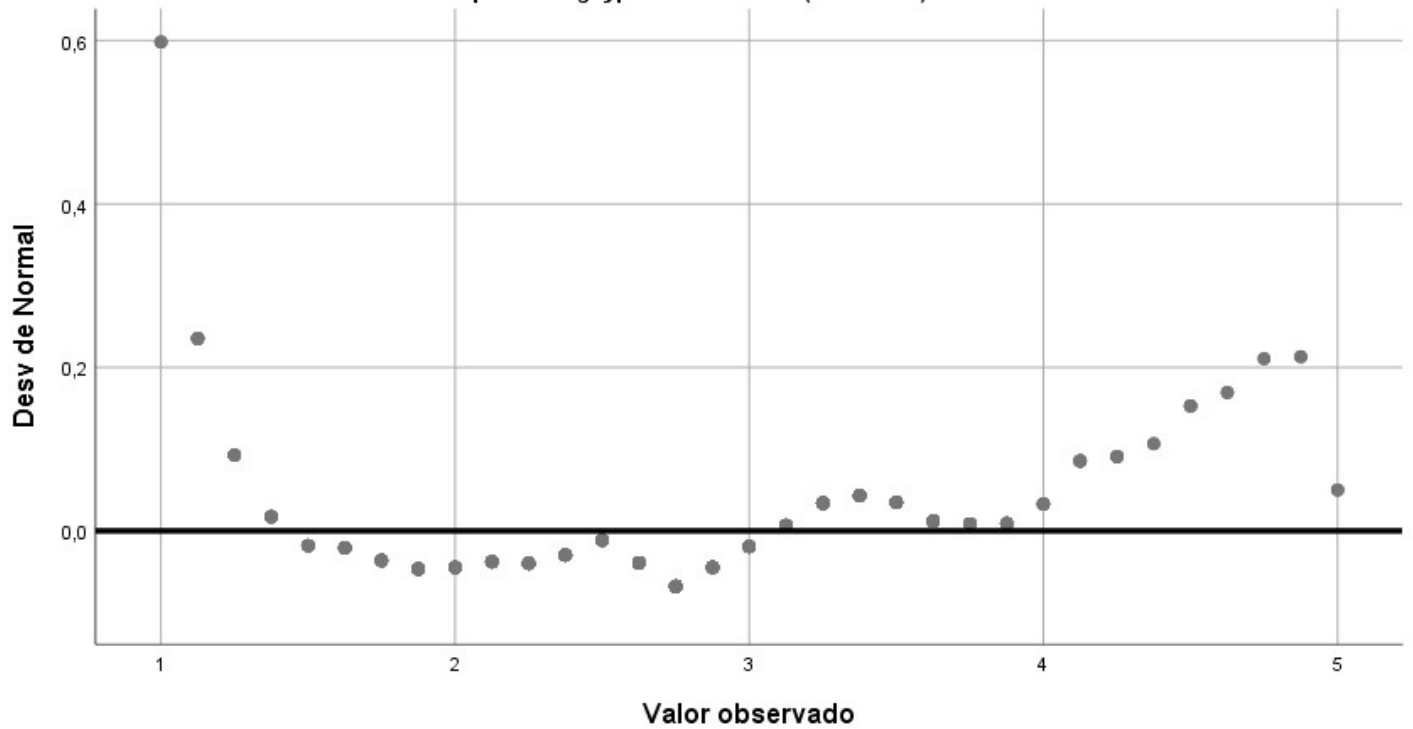

Gráfico Q-Q Normal sem Tendência de OLBI Disengagement Score

para RsPrgType= Medical

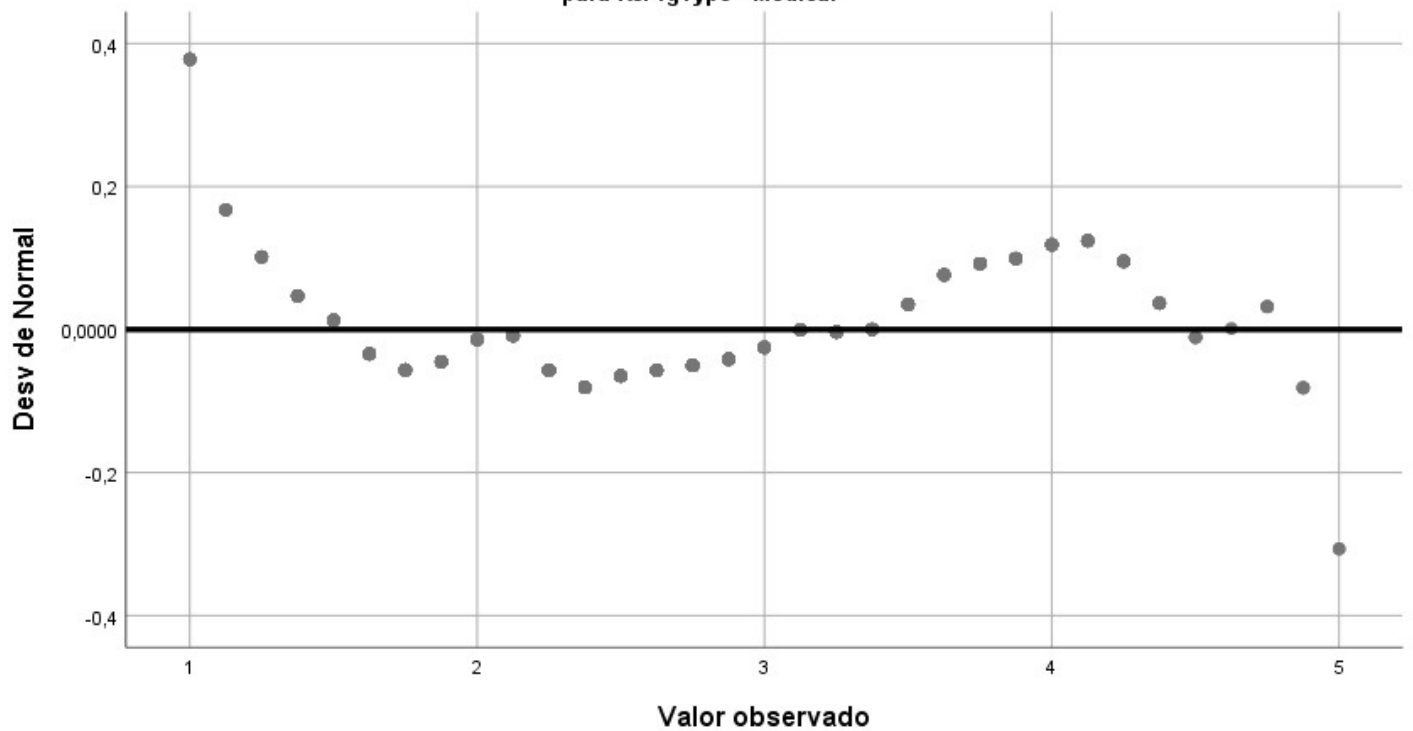

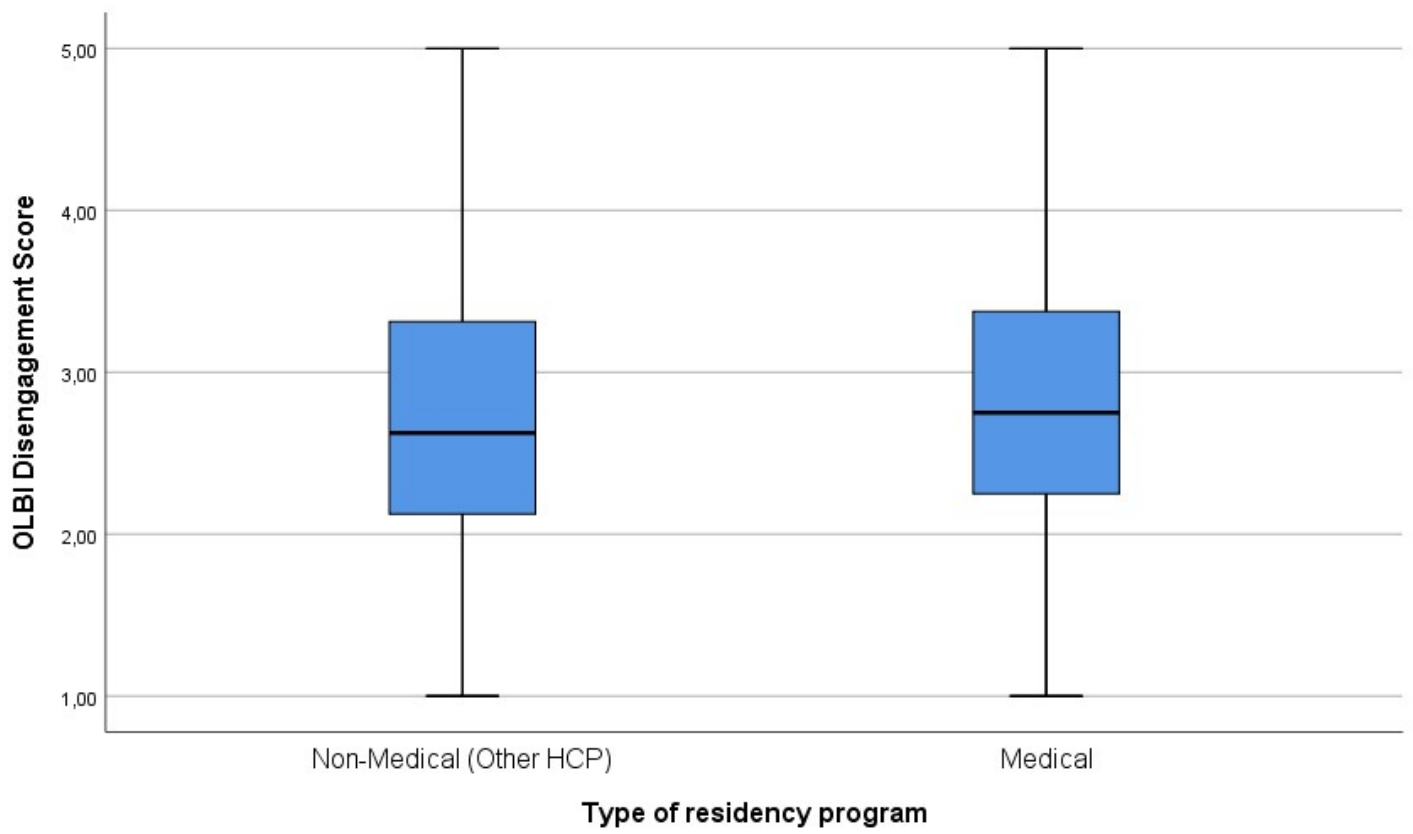

OLBI Exhaustion Score

Histogramas

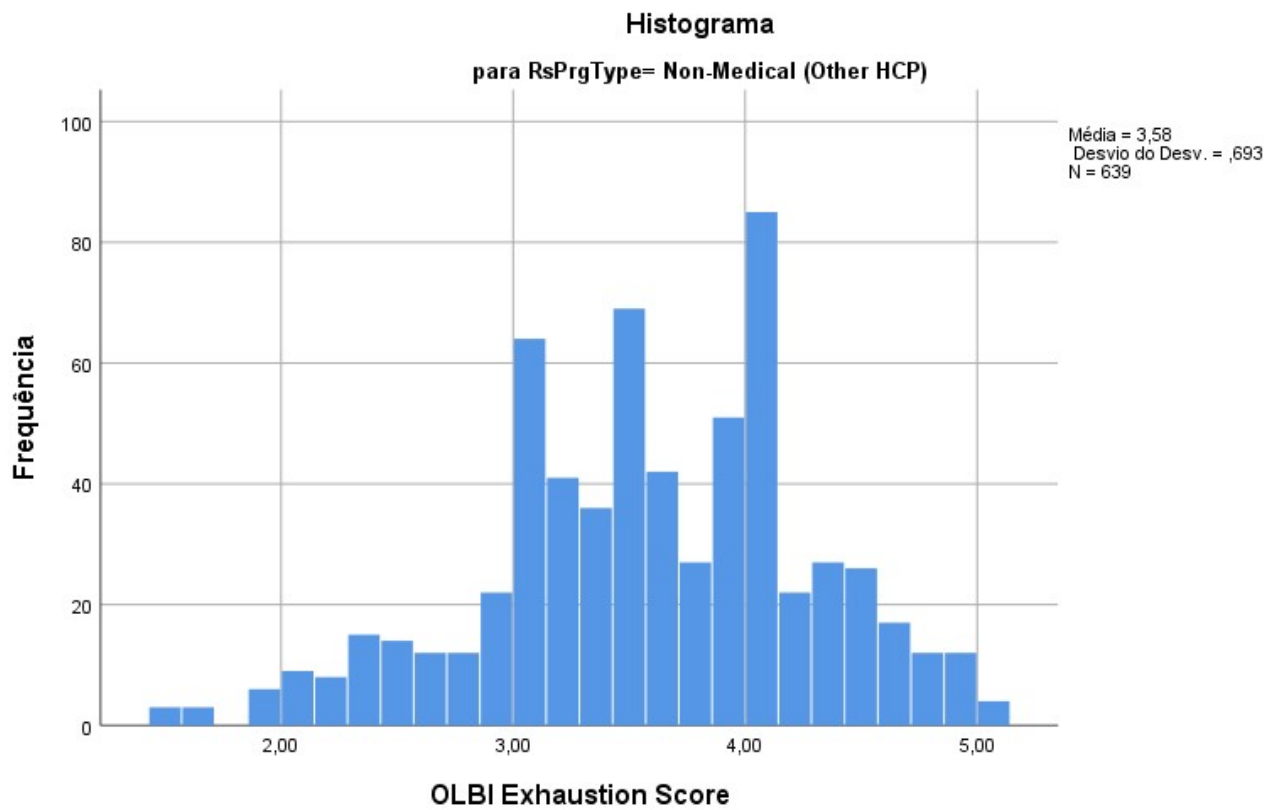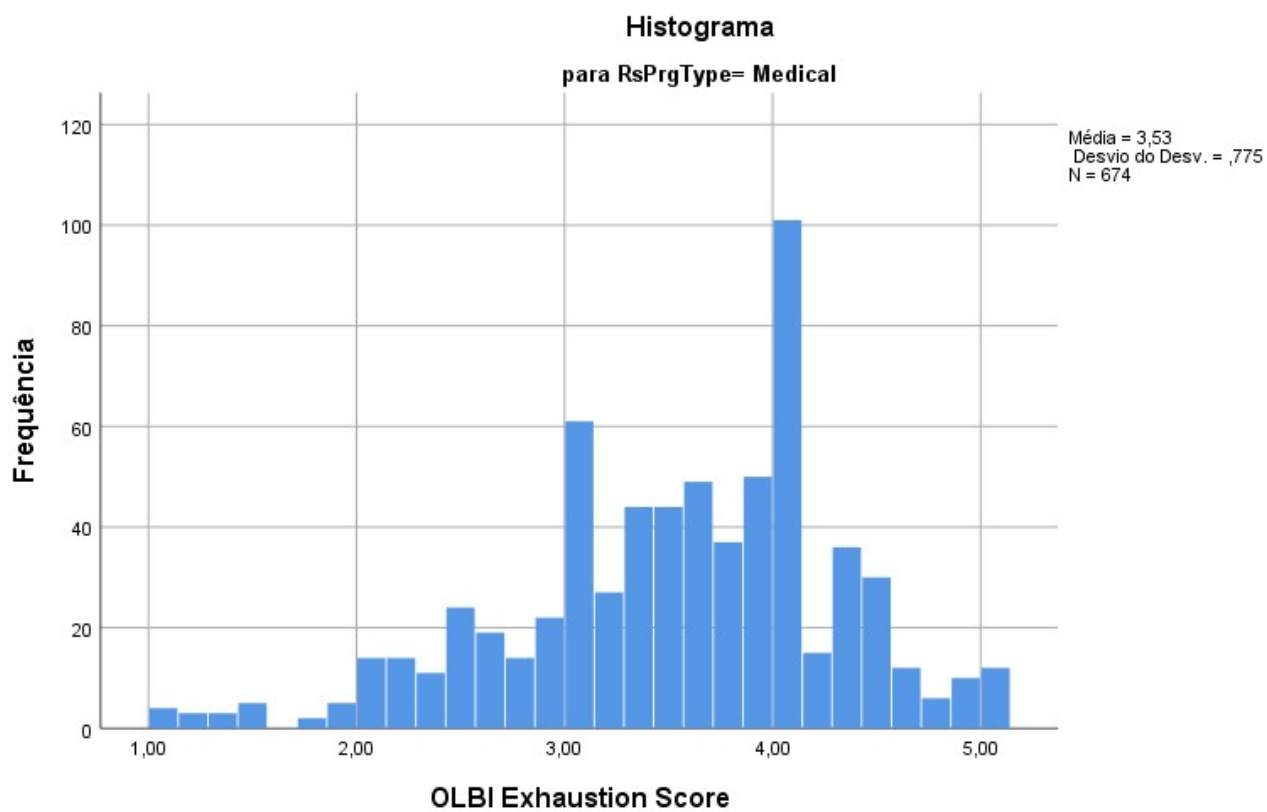

Gráfico Q-Q normais

Gráfico Q-Q Normal de OLBI Exhaustion Score

para RsPrgType= Non-Medical (Other HCP)

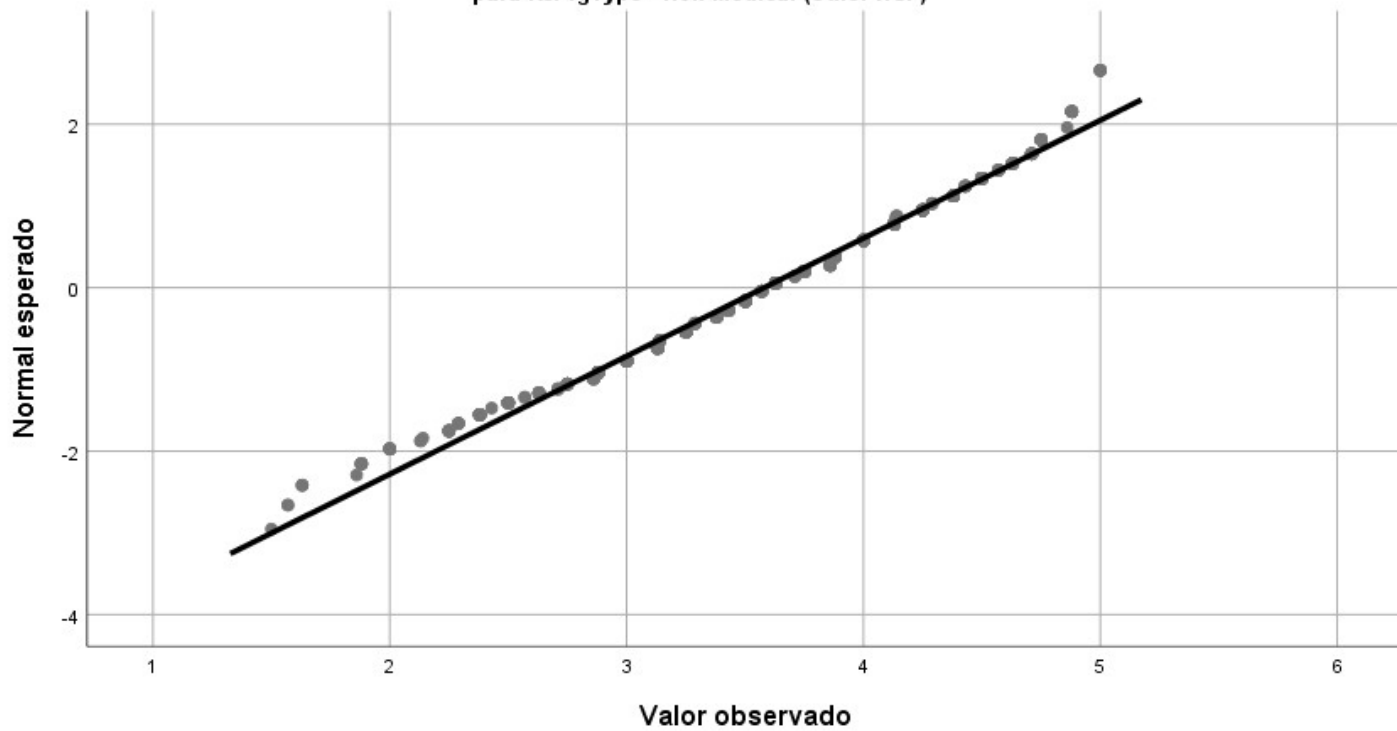

Gráfico Q-Q Normal de OLBI Exhaustion Score

para RsPrgType= Medical

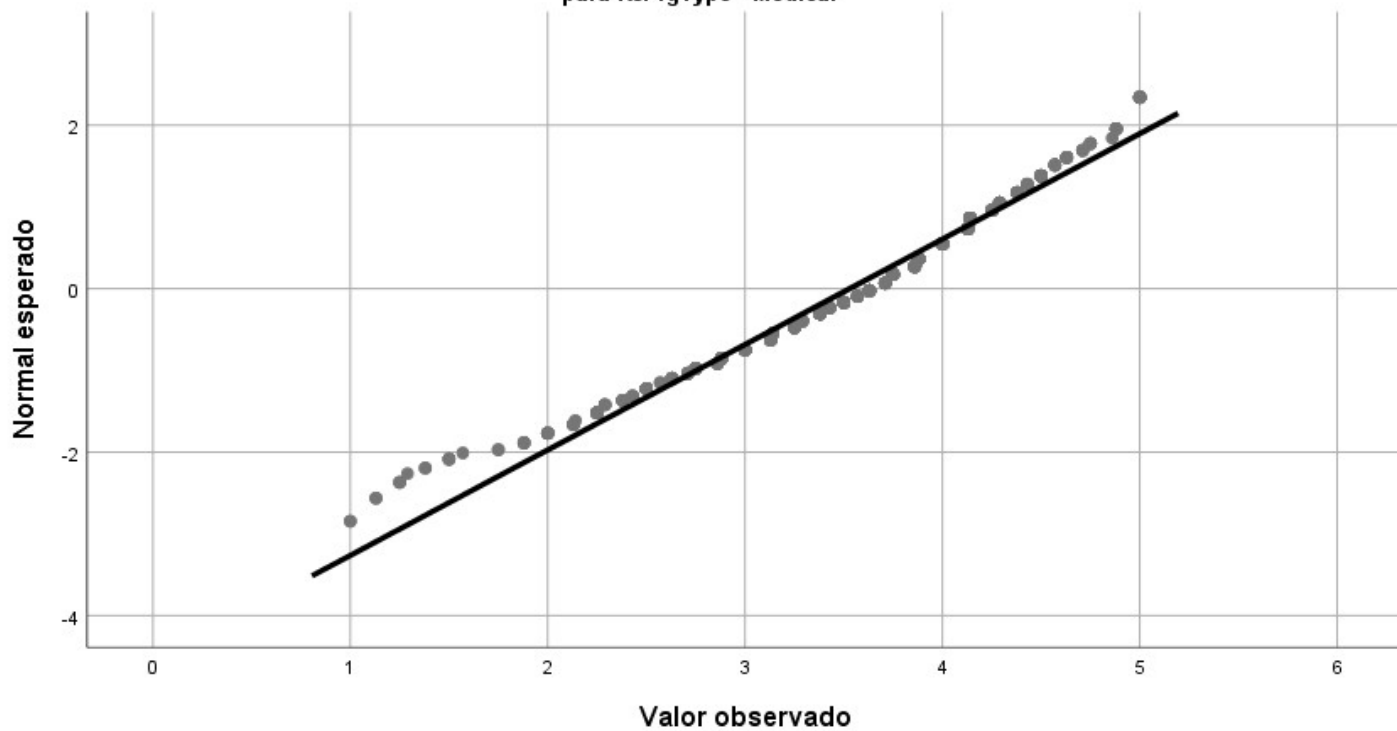

Gráfico Q-Q normais sem tendência

Gráfico Q-Q Normal sem Tendência de OLBI Exhaustion Score

para RsPrgType= Non-Medical (Other HCP)

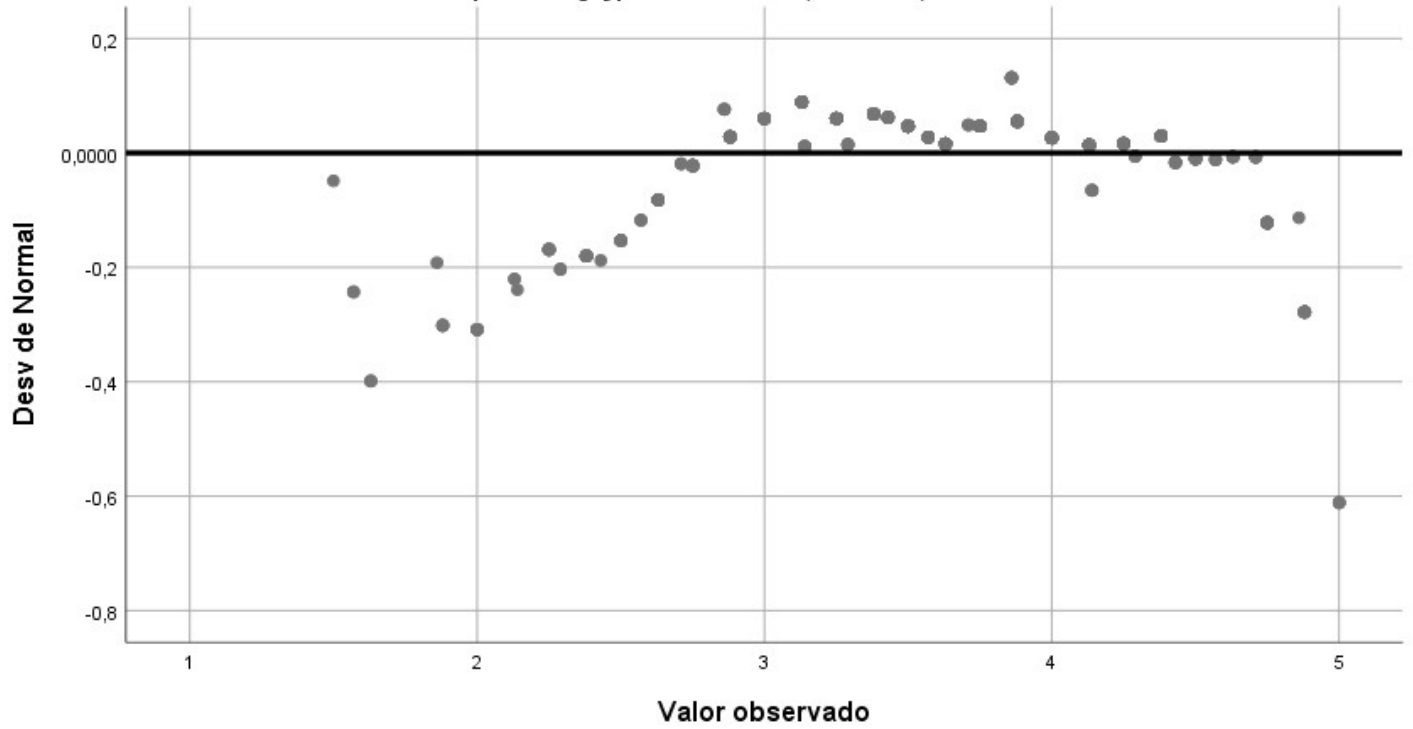

Gráfico Q-Q Normal sem Tendência de OLBI Exhaustion Score

para RsPrgType= Medical

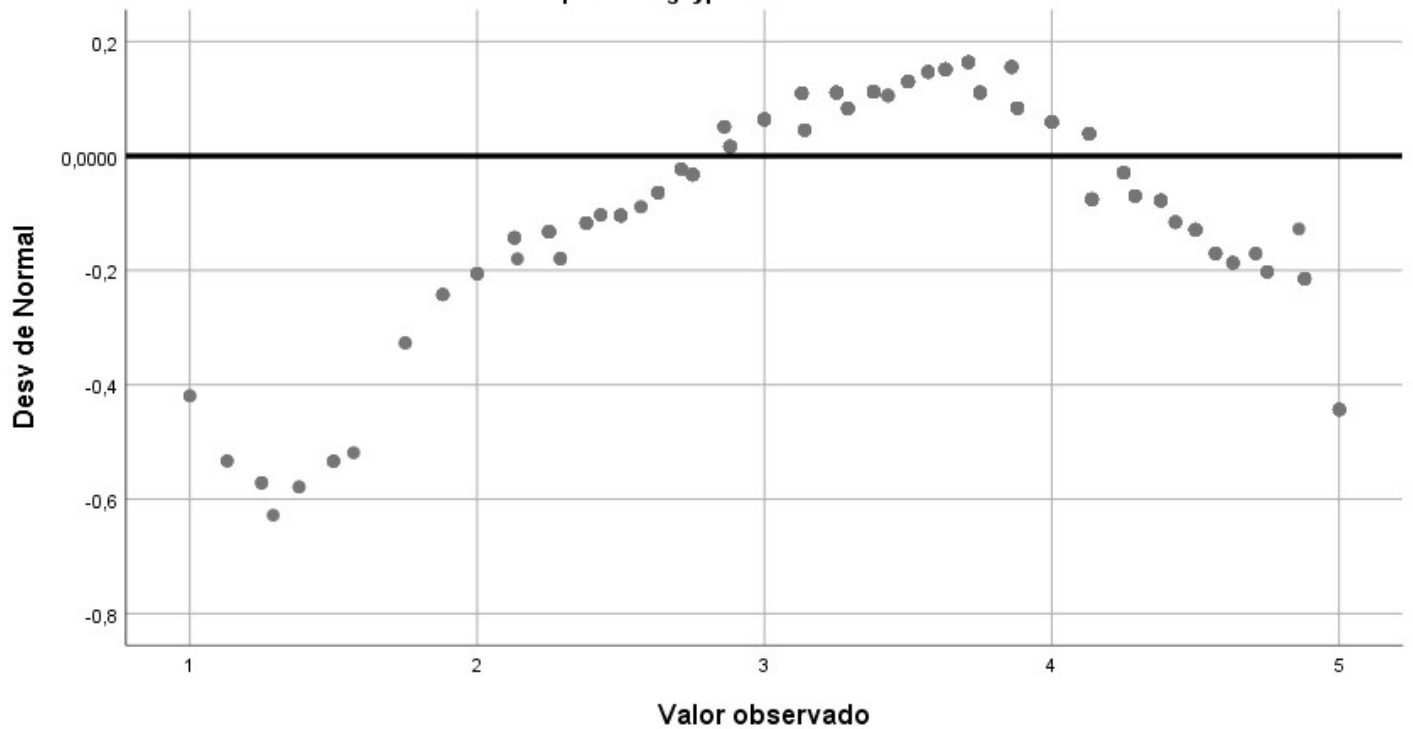

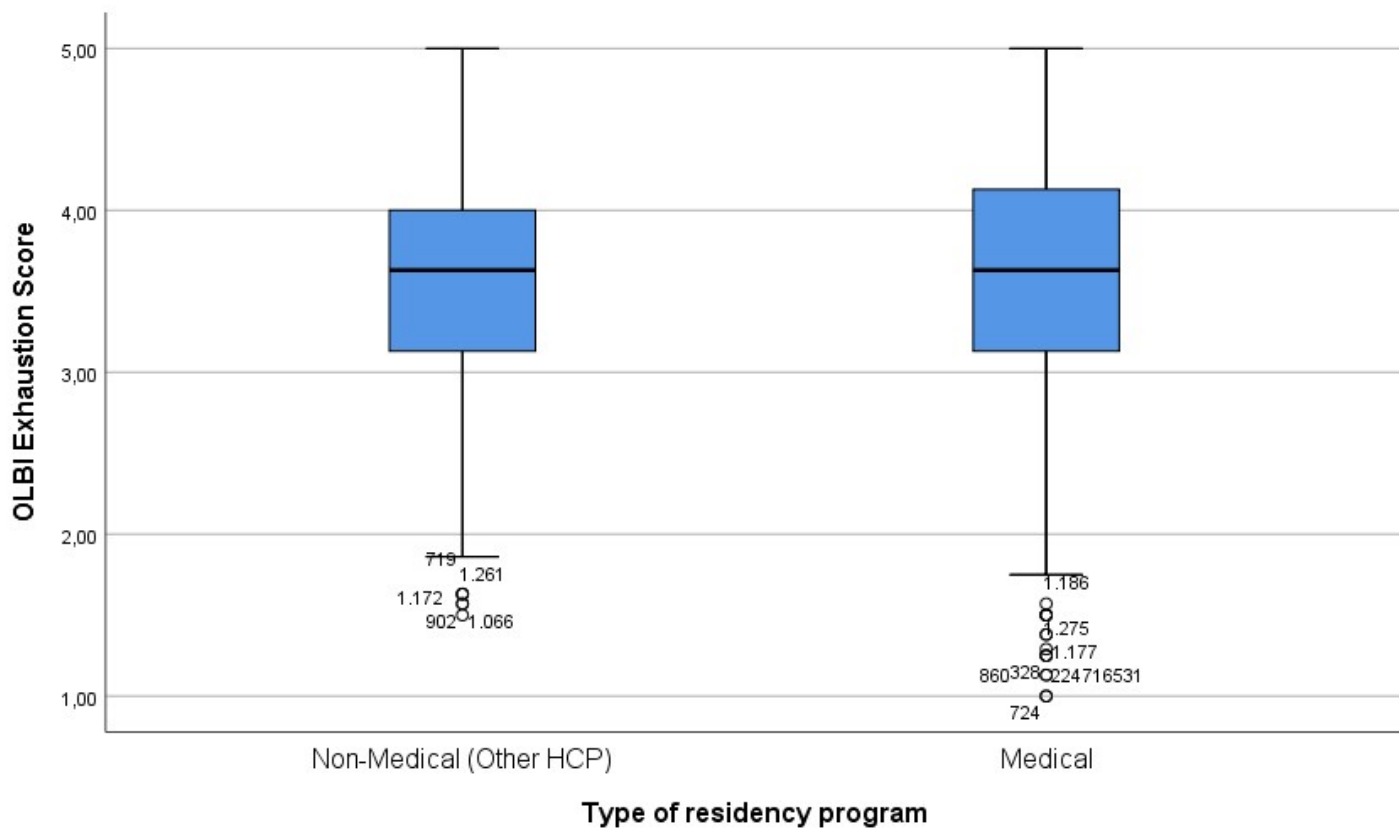

OLBI Total Score

Histogramas

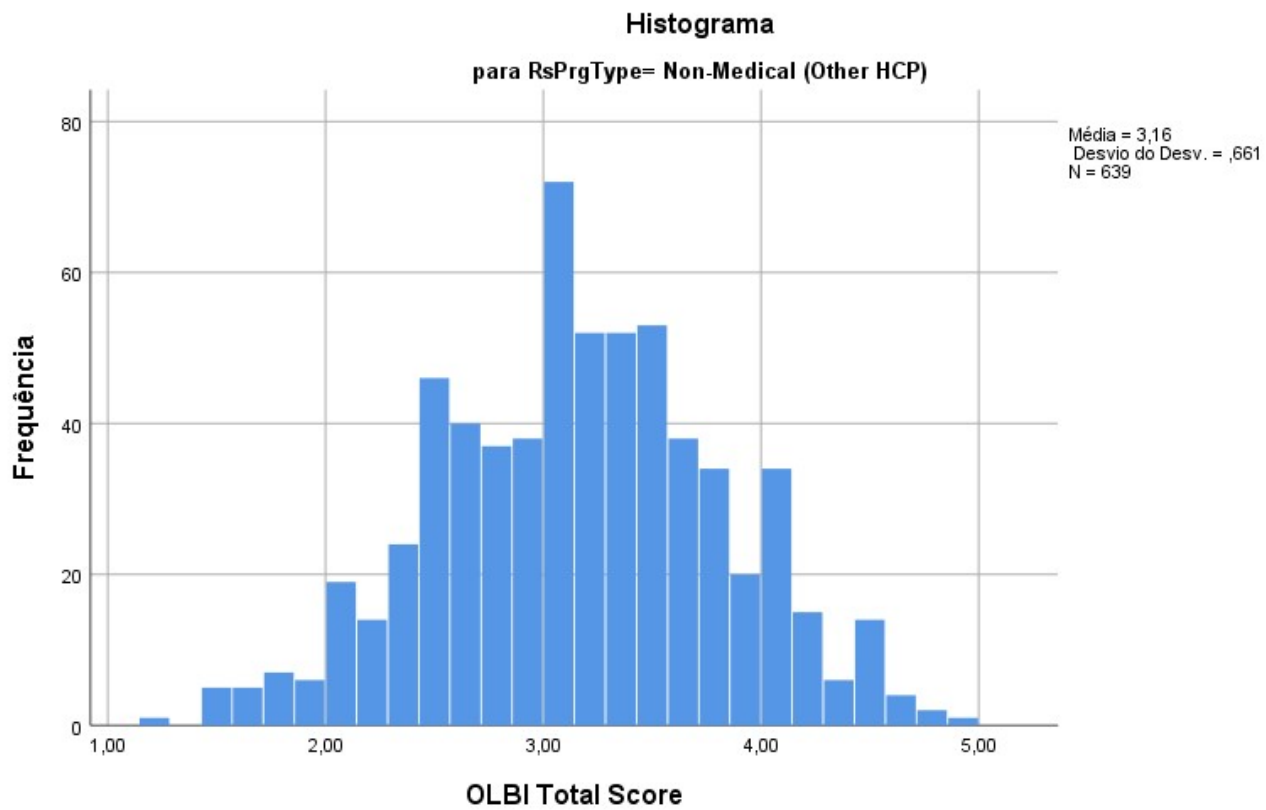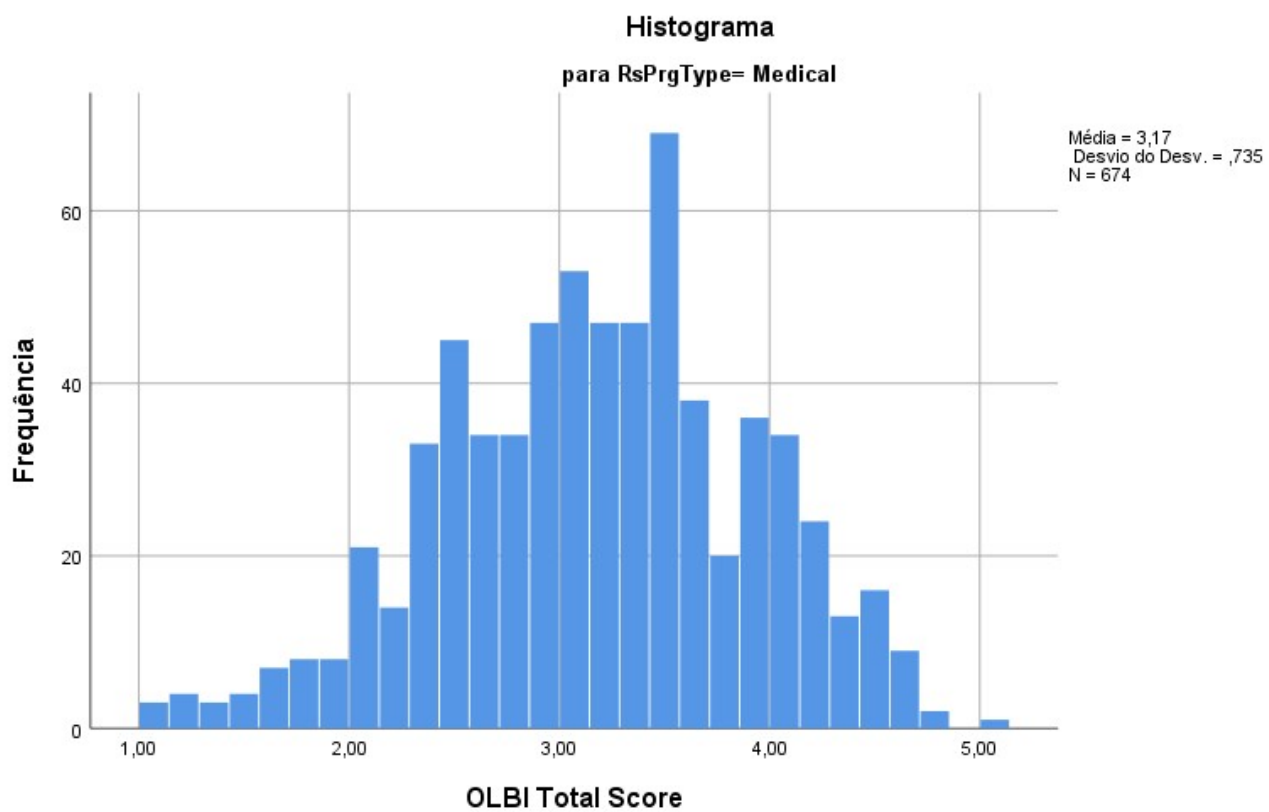

Gráfico Q-Q normais

Gráfico Q-Q Normal de OLBI Total Score  
para RsPrgType= Non-Medical (Other HCP)

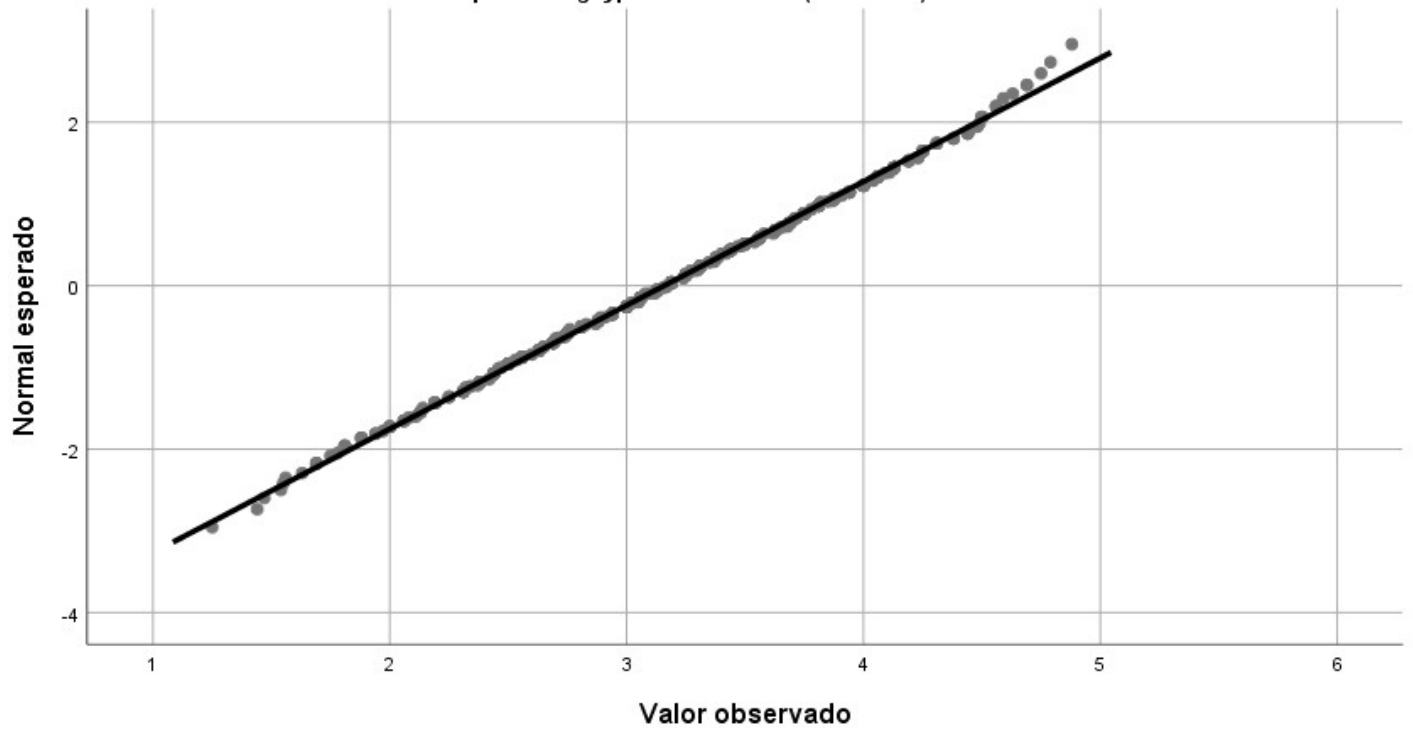

Gráfico Q-Q Normal de OLBI Total Score  
para RsPrgType= Medical

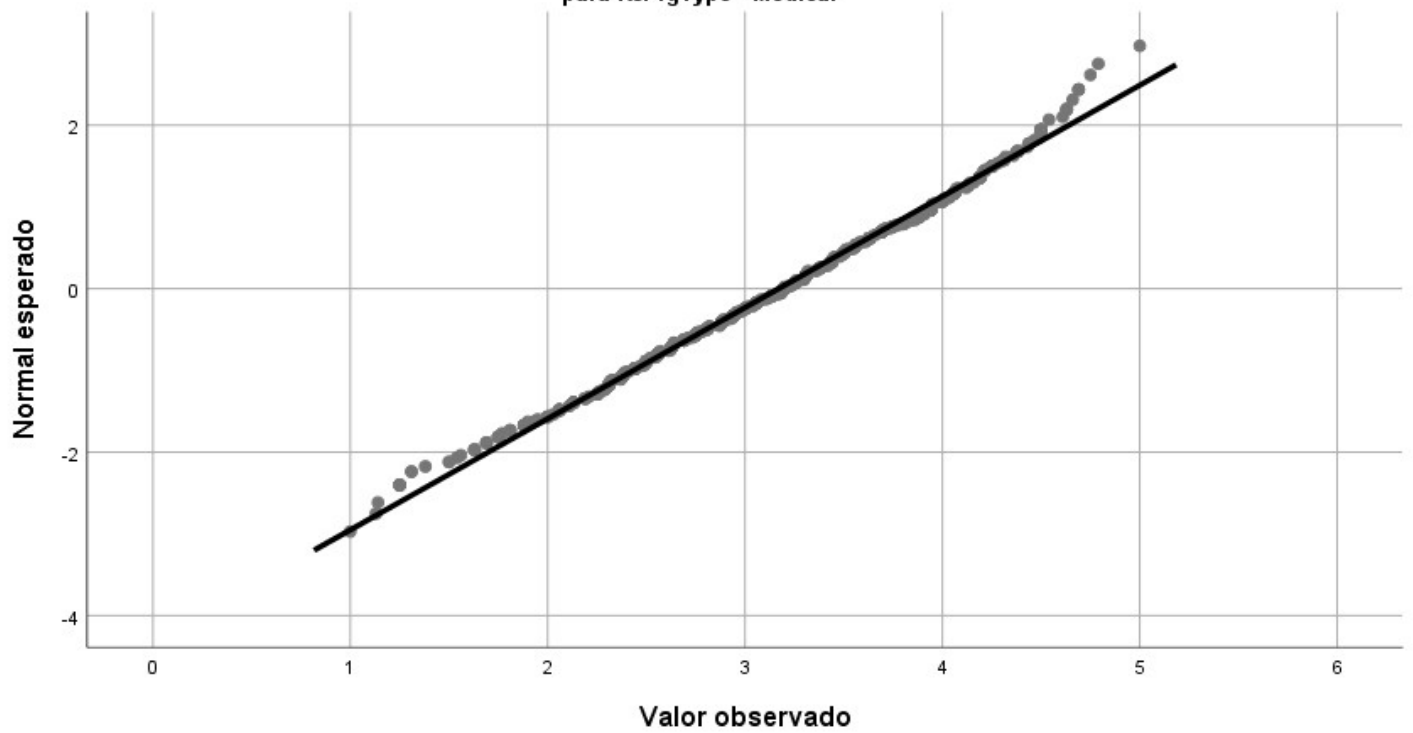

Gráfico Q-Q normais sem tendência

Gráfico Q-Q Normal sem Tendência de OLBI Total Score

para RsPrgType= Non-Medical (Other HCP)

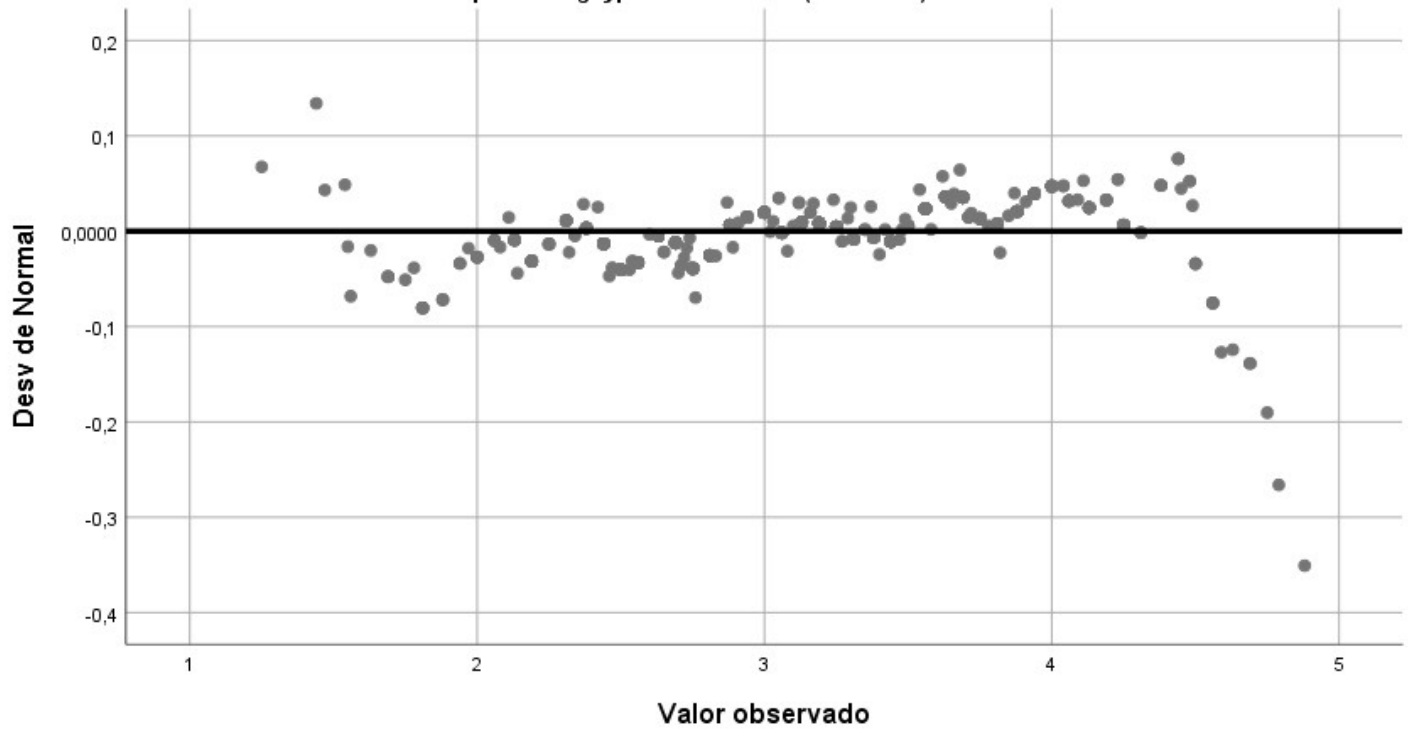

Gráfico Q-Q Normal sem Tendência de OLBI Total Score

para RsPrgType= Medical

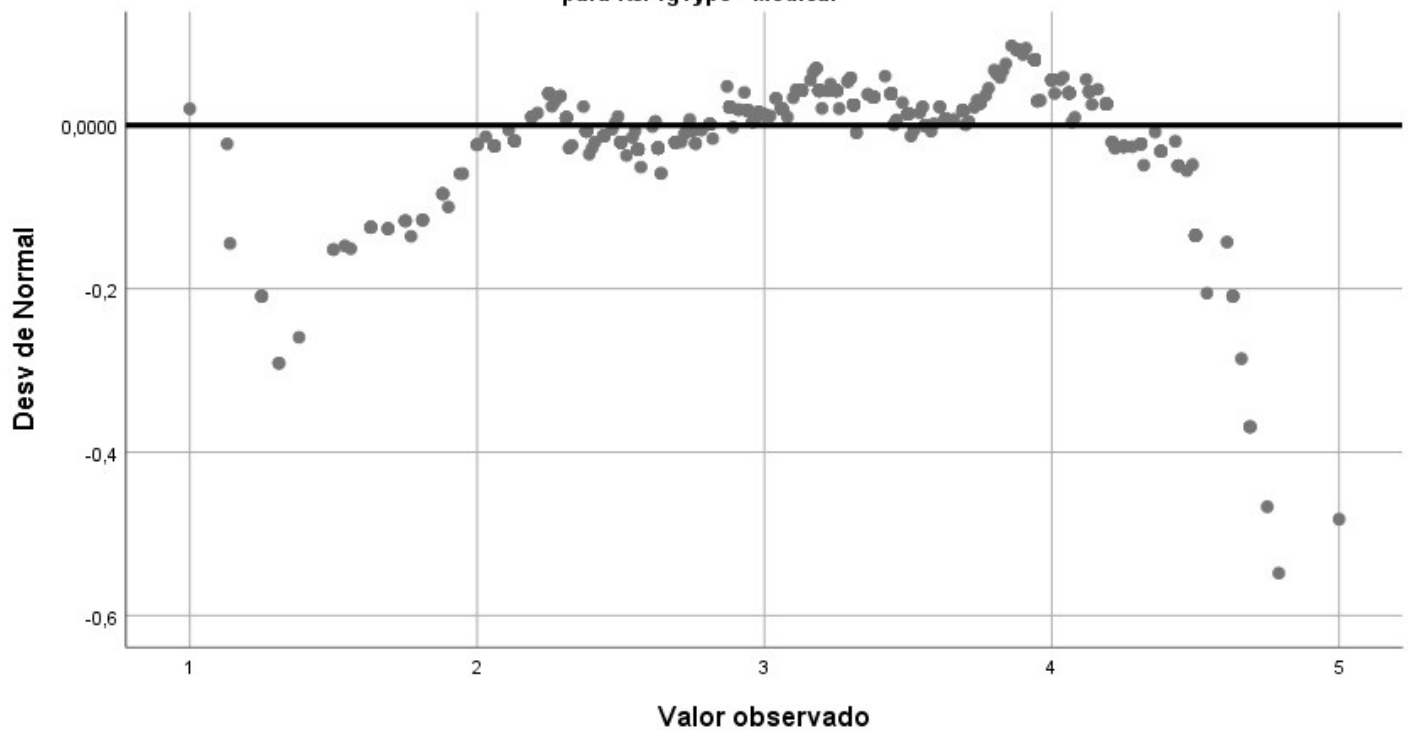

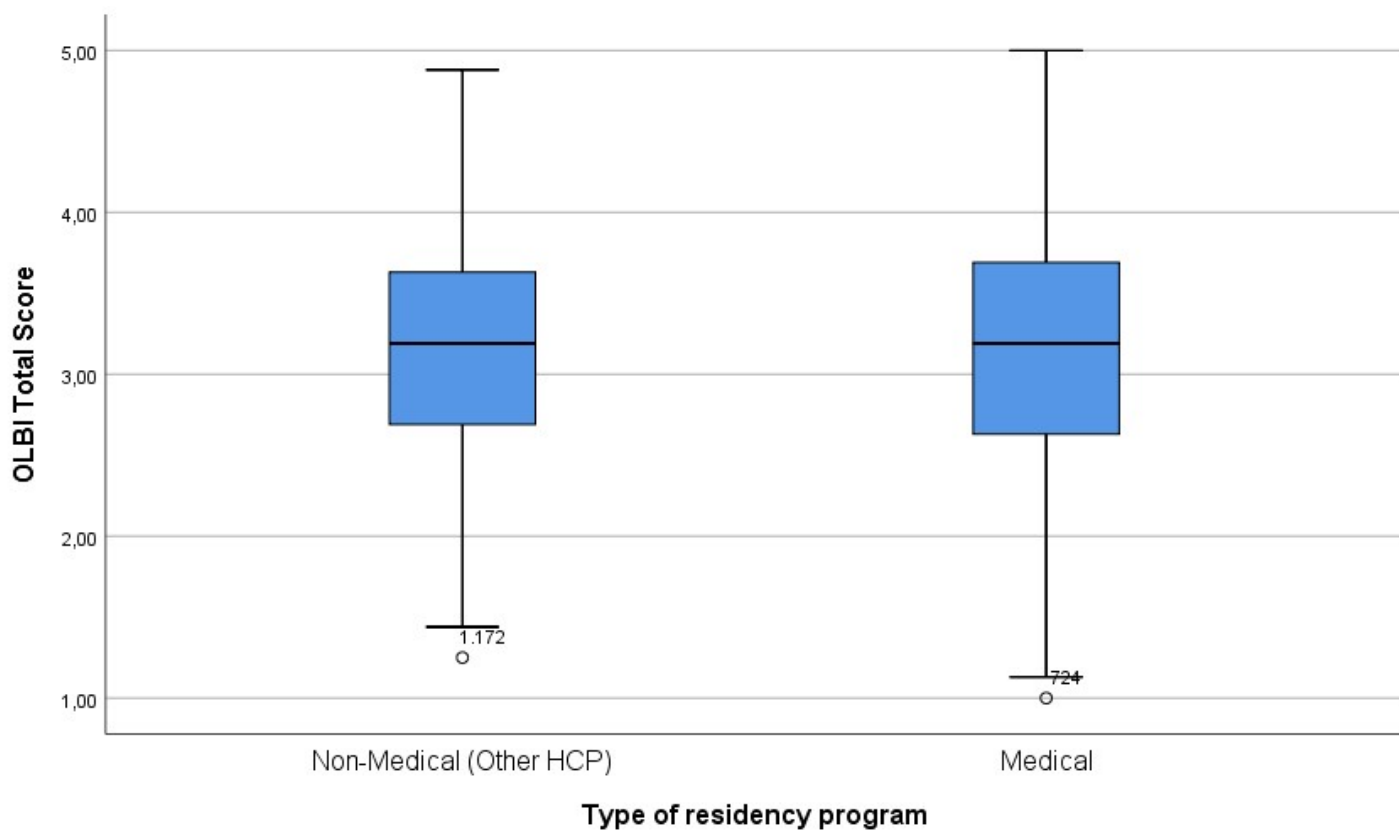

Na sua opinião, qual o seu grau de autonomia para decidir condutas no trabalho? (EAV 1-10)

Histogramas

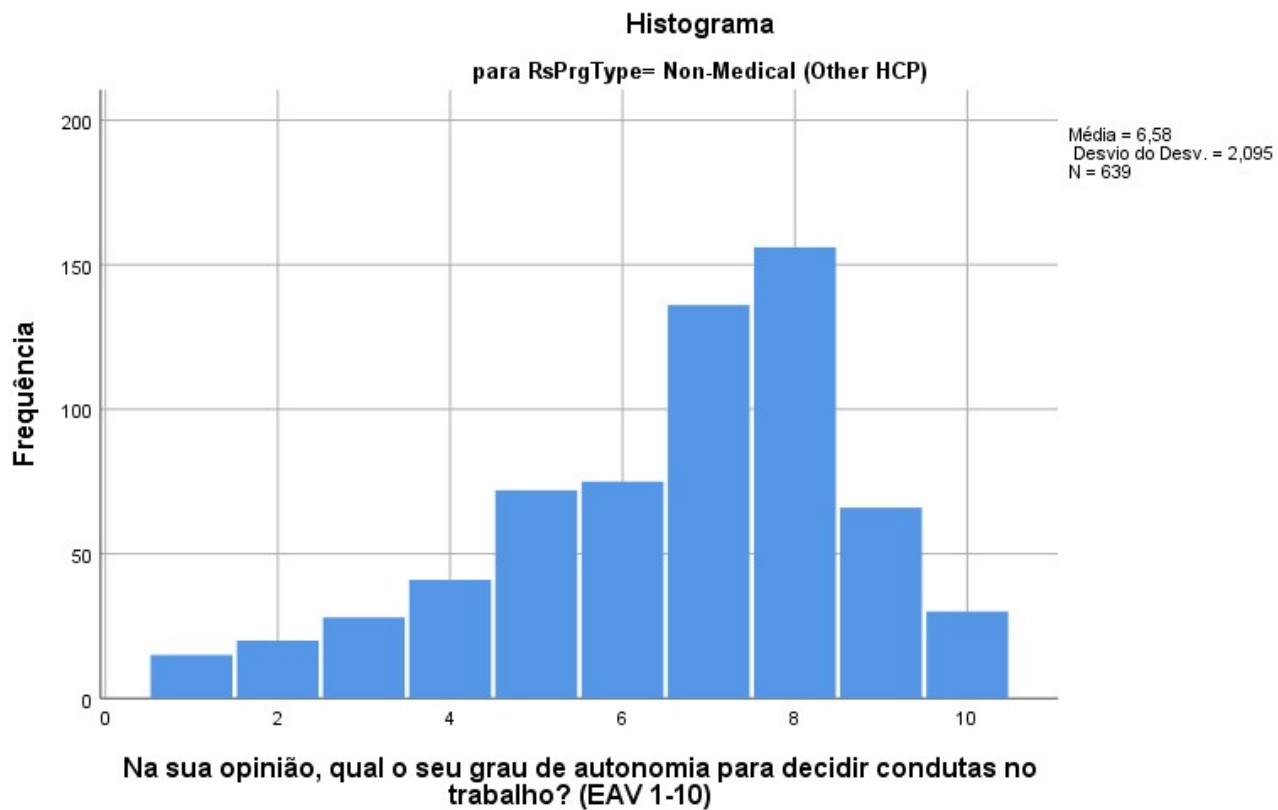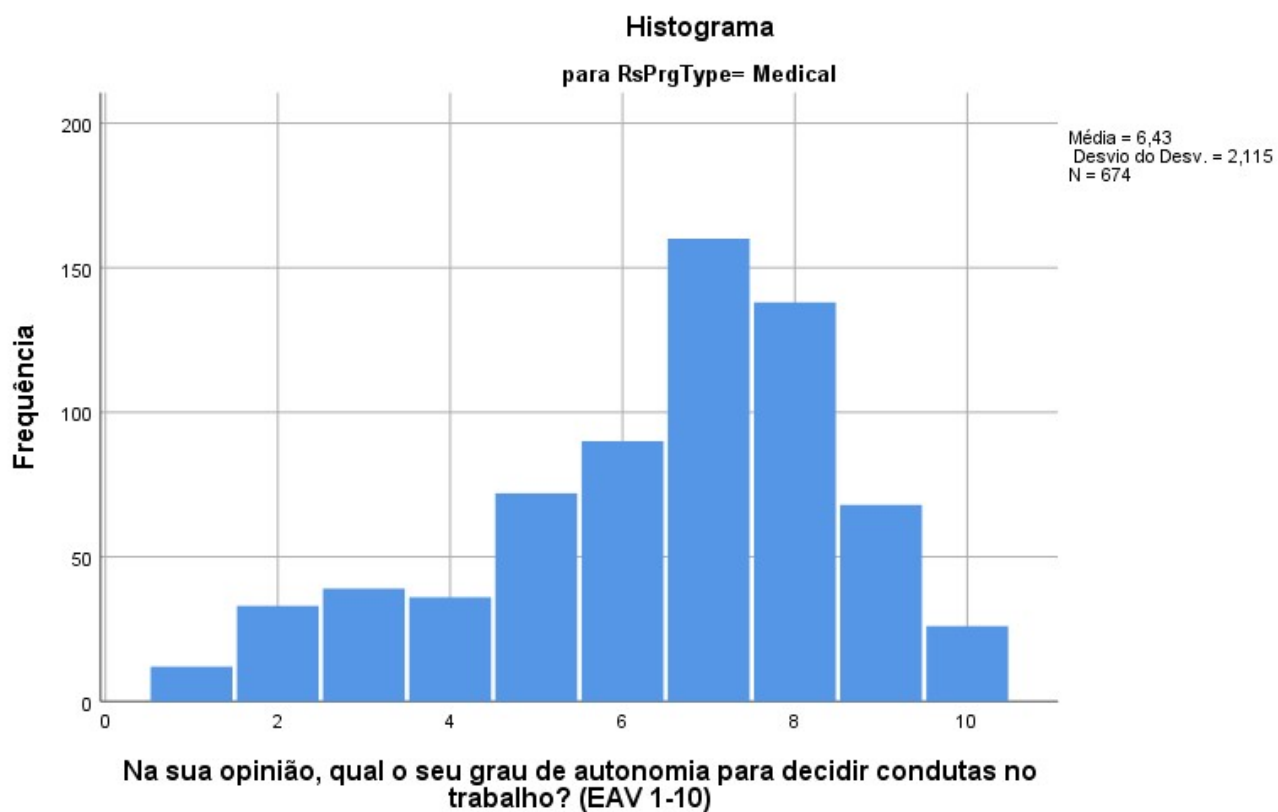

Gráfico Q-Q Normal de Na sua opinião, qual o seu grau de autonomia para decidir condutas no trabalho? (EAV 1-10)

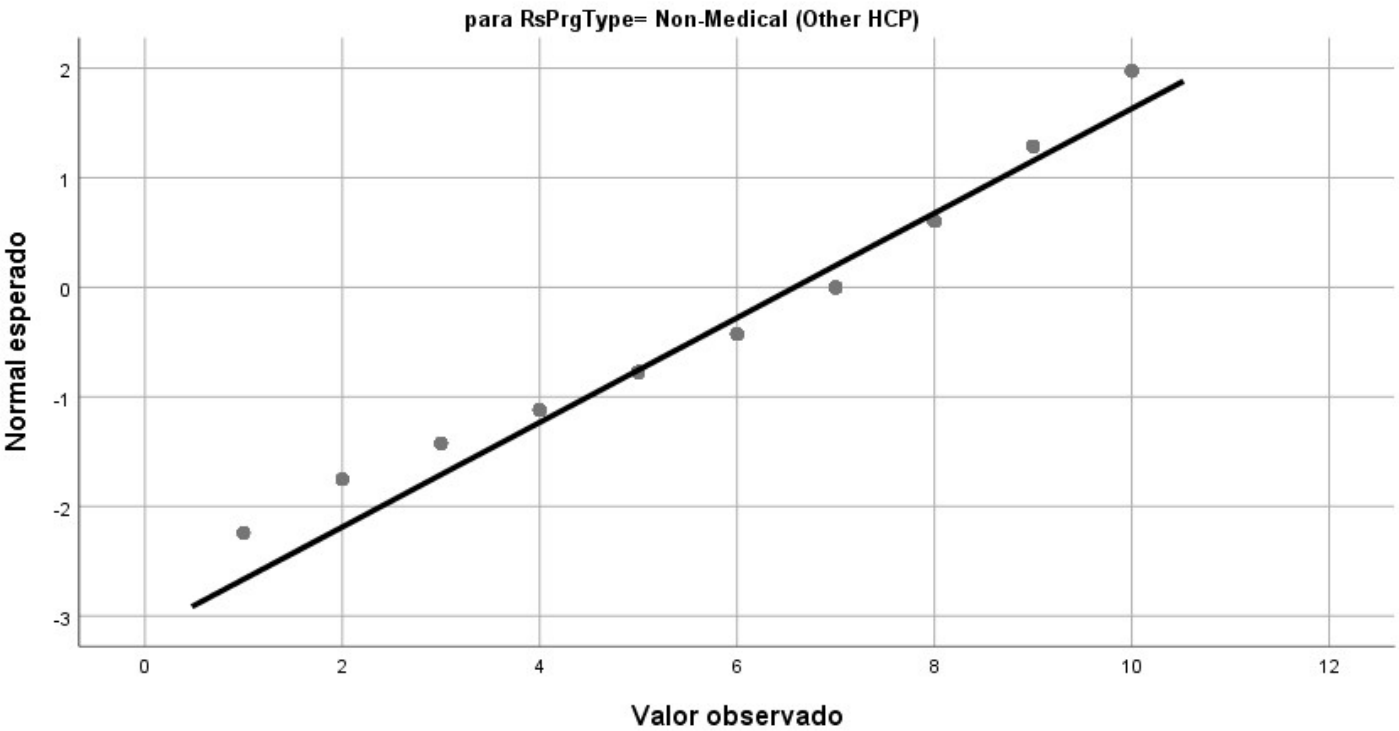

Gráfico Q-Q Normal de Na sua opinião, qual o seu grau de autonomia para decidir condutas no trabalho? (EAV 1-10)

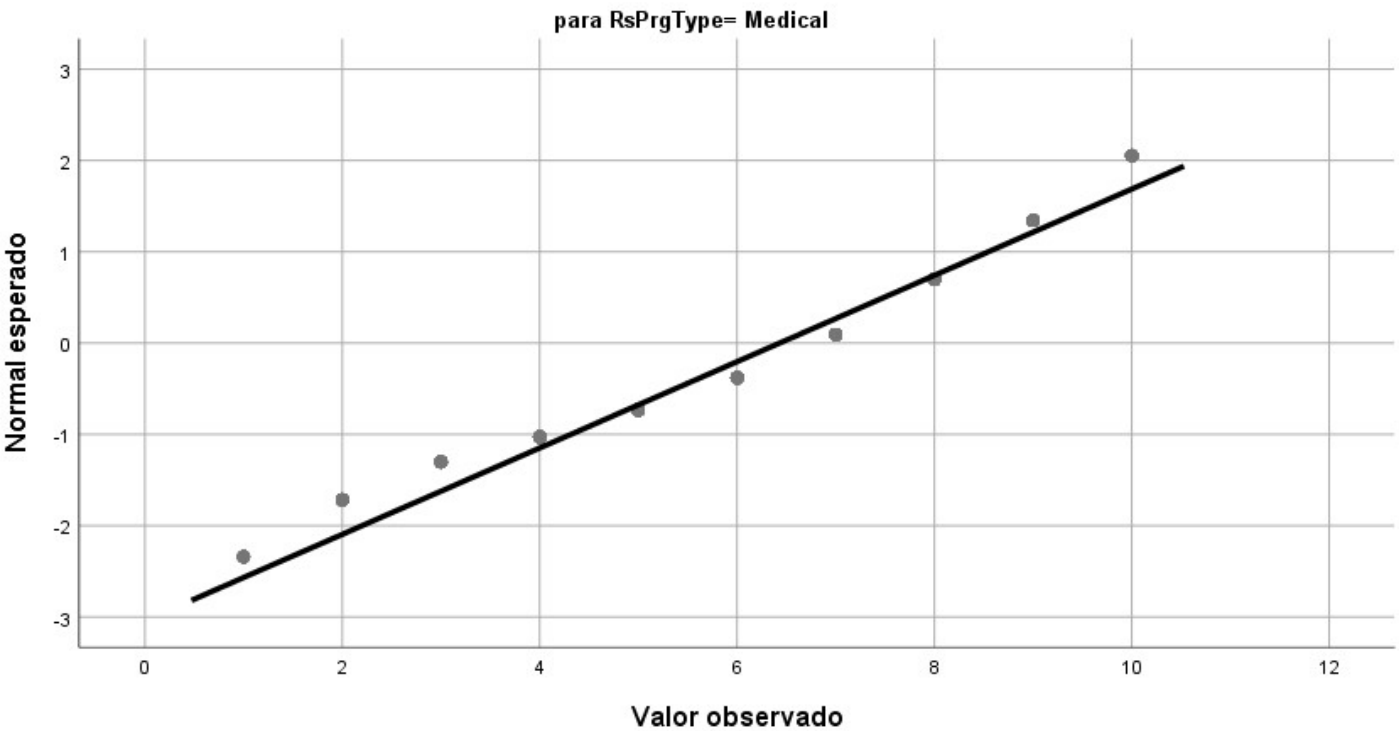

Gráfico Q-Q normais sem tendência

Gráfico Q-Q Normal sem Tendência de Na sua opinião, qual o seu grau de autonomia para decidir condutas no trabalho? (EAV 1-10)

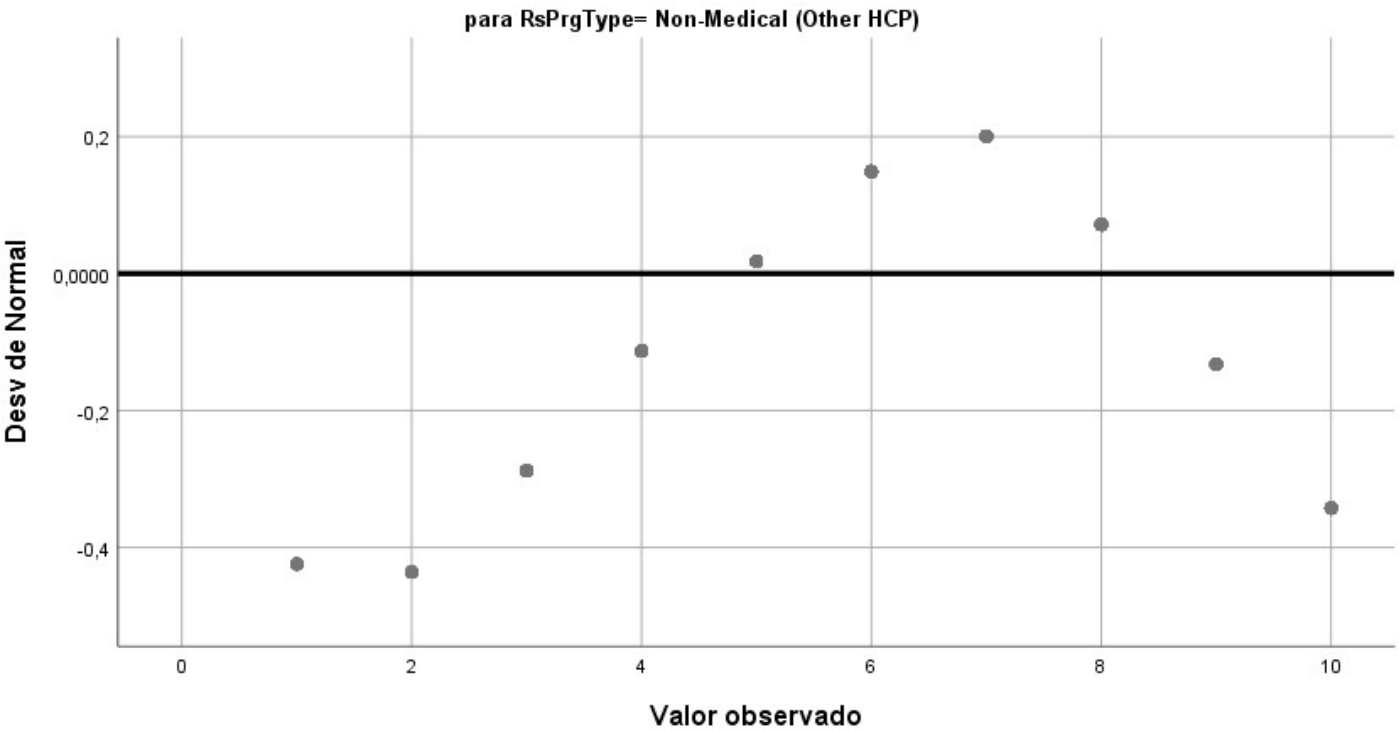

Gráfico Q-Q Normal sem Tendência de Na sua opinião, qual o seu grau de autonomia para decidir condutas no trabalho? (EAV 1-10)

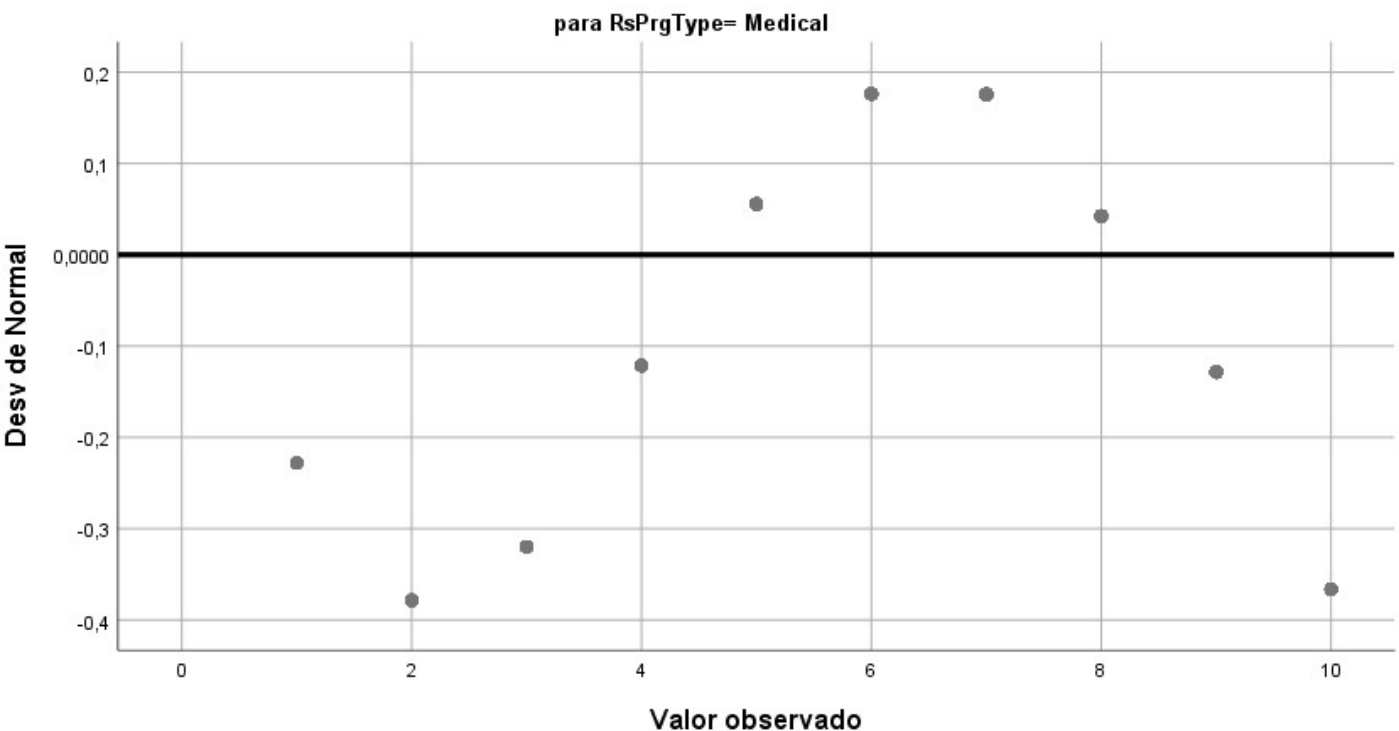

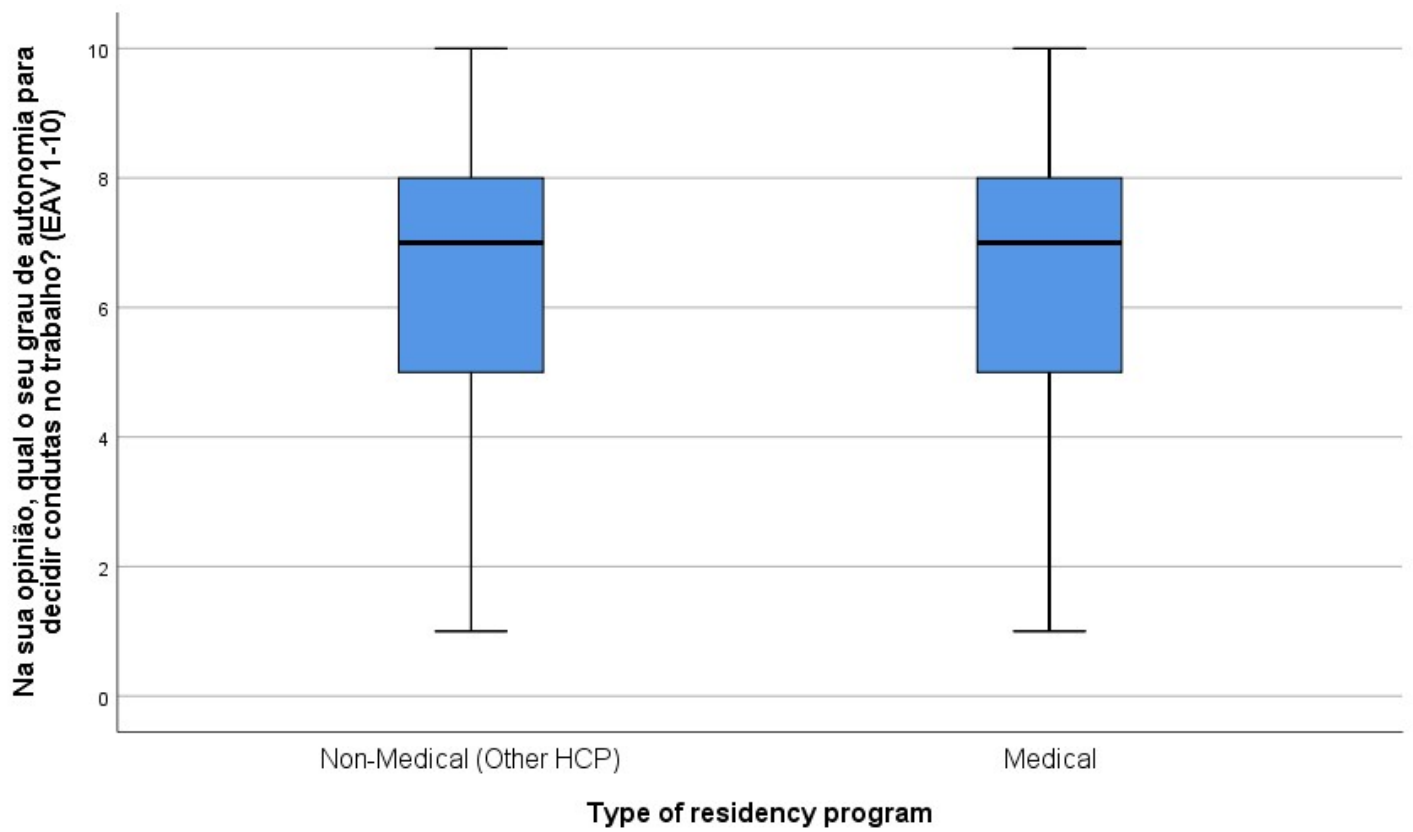

Na sua opinião, qual o grau de adequação da organização pedagógica de seu programa de residência profissional? (EAV 1-10)

Histogramas

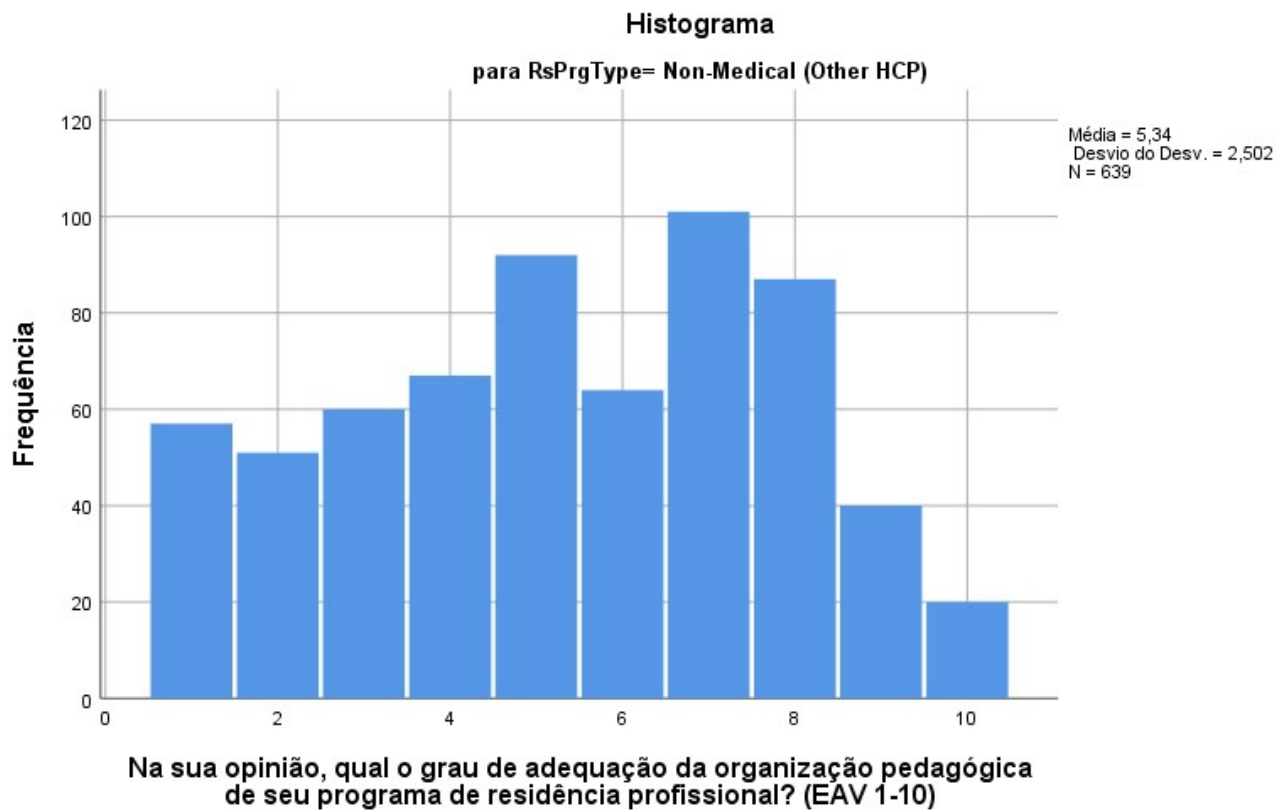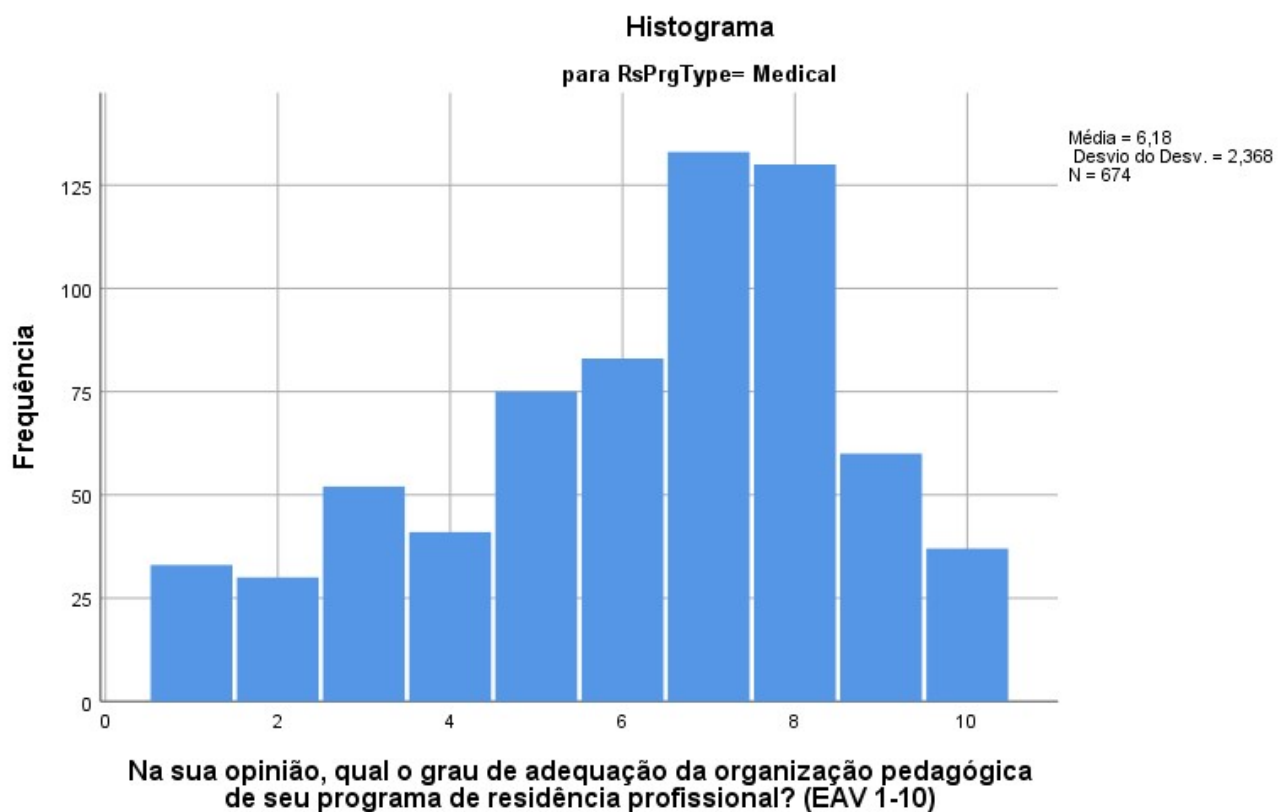

Gráfico Q-Q Normal de Na sua opinião, qual o grau de adequação da organização pedagógica de seu programa de residência profissional? (EAV 1-10)

para RsPrgType= Non-Medical (Other HCP)

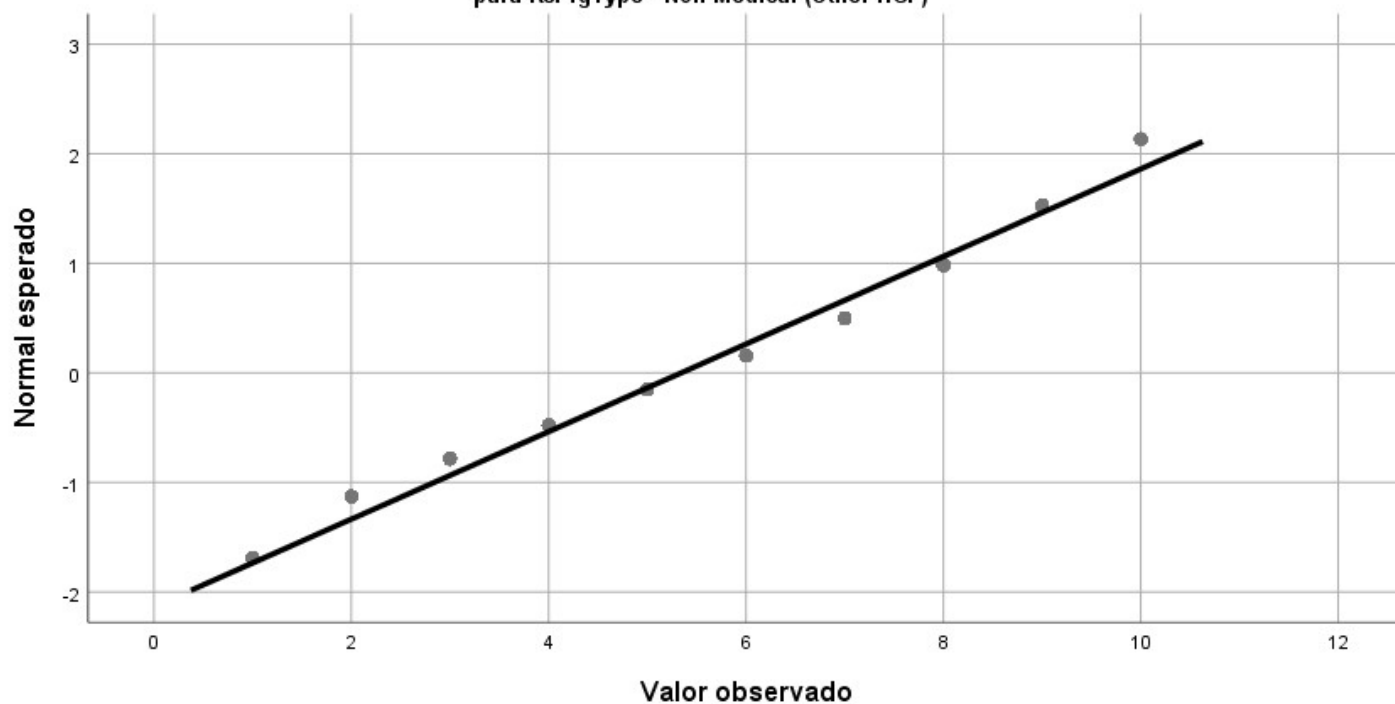

Gráfico Q-Q Normal de Na sua opinião, qual o grau de adequação da organização pedagógica de seu programa de residência profissional? (EAV 1-10)

para RsPrgType= Medical

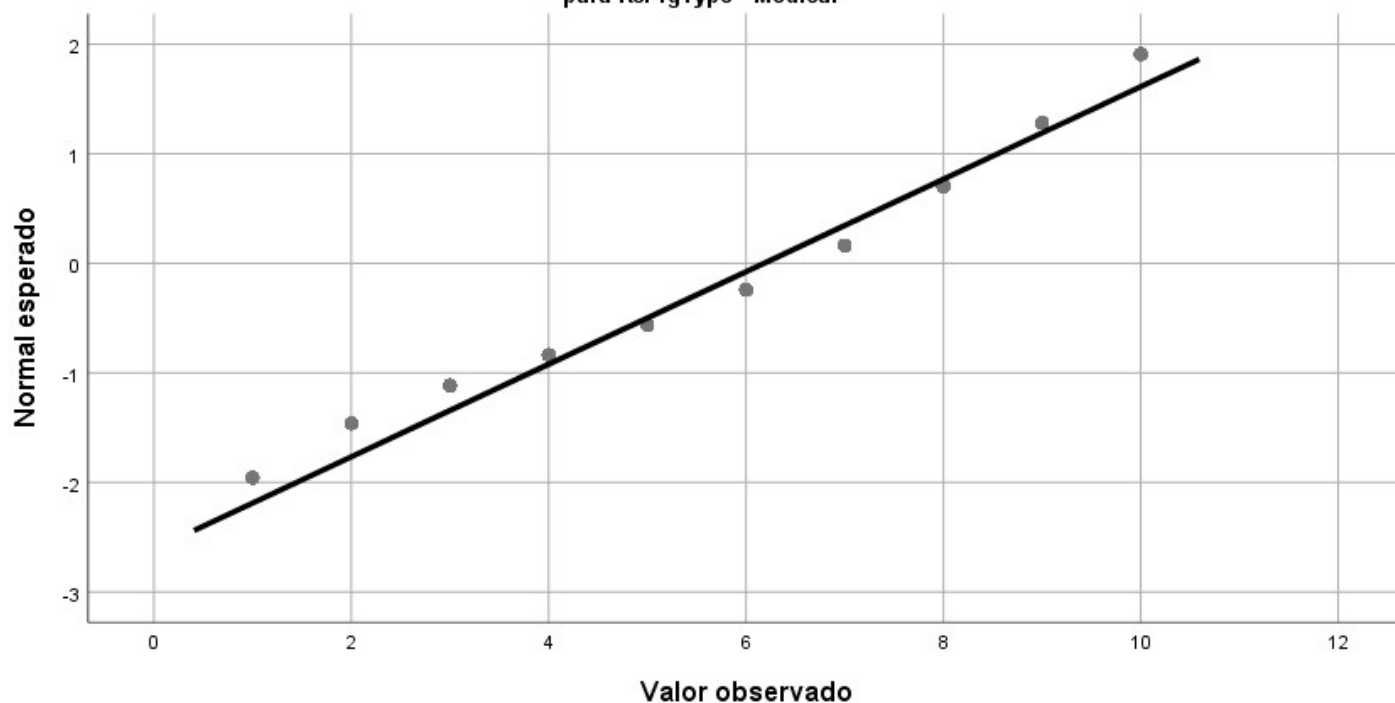

**Gráfico Q-Q Normal sem Tendência de Na sua opinião, qual o grau de adequação da organização pedagógica de seu programa de residência profissional? (EAV 1-10)**

para RsPrgType= Non-Medical (Other HCP)

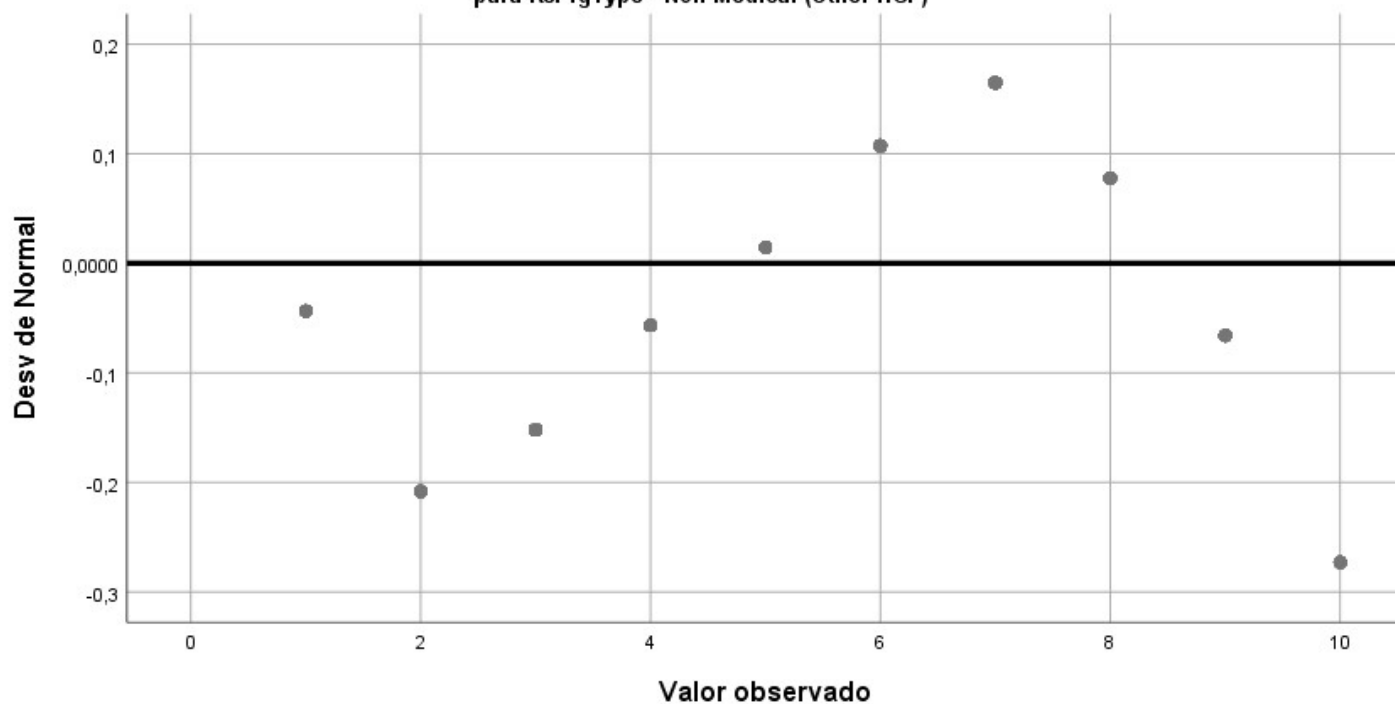

**Gráfico Q-Q Normal sem Tendência de Na sua opinião, qual o grau de adequação da organização pedagógica de seu programa de residência profissional? (EAV 1-10)**

para RsPrgType= Medical

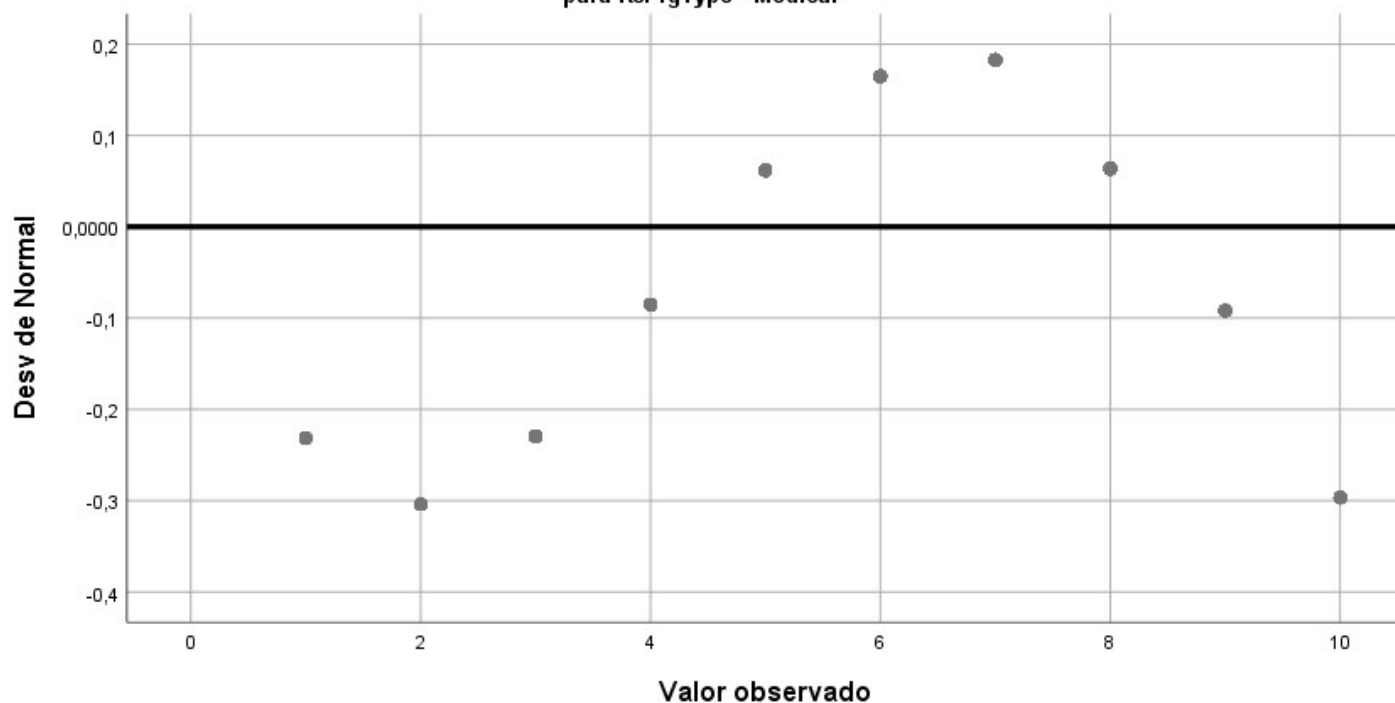

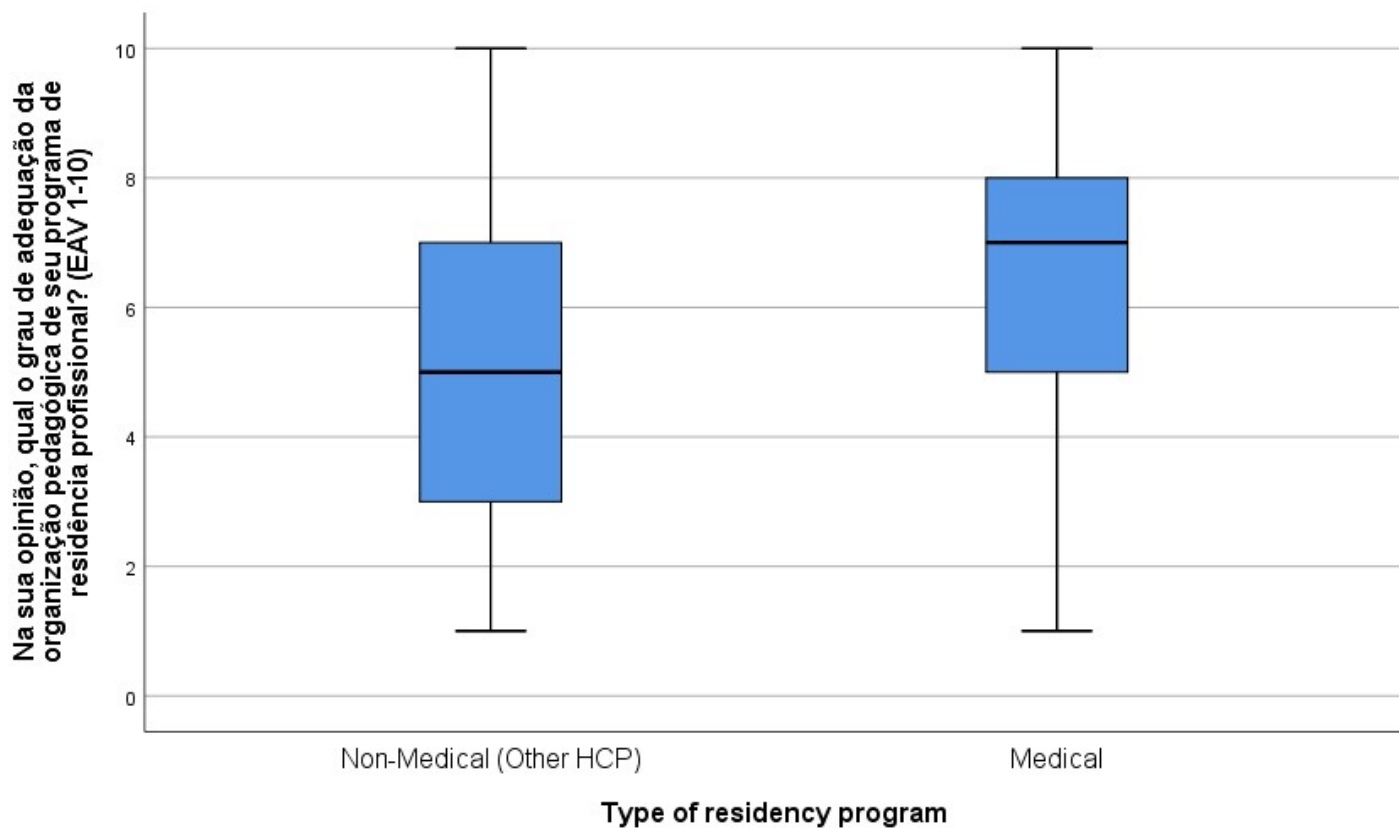

T-TEST GROUPS=RsPrgType(0 1)  
 /MISSING=ANALYSIS  
 /VARIABLES=Age DASS21\_D DASS21\_A DASS21\_S PHQ9\_Score BRCS\_Score OLBI\_D OLBI\_E OLBI\_Total  
 Autonomy  
 PedagStruct  
 /CRITERIA=CI(.95).

Teste-T

### Observações

|                             |                                             |                                                                      |
|-----------------------------|---------------------------------------------|----------------------------------------------------------------------|
| Saída criada                |                                             | 20-SEP-2020 12:14:47                                                 |
| Comentários                 |                                             |                                                                      |
| Entrada                     | Dados                                       | C:\Users\User\Documents\Pesquisa\Fellow\FellowGenData_V1.sav         |
|                             | Conjunto de dados ativo                     | ConjuntodeDados1                                                     |
|                             | Filtro                                      | <none>                                                               |
|                             | Ponderação                                  | <none>                                                               |
|                             | Arquivo Dividido                            | <none>                                                               |
|                             | N de linhas em arquivo de dados de trabalho | 1313                                                                 |
|                             |                                             |                                                                      |
| Tratamento de valor omissos | Definição de omissos                        | Os valores omissos definidos pelo usuário são tratados como omissos. |

|                  |                      |                                                                                                                                                                                                         |
|------------------|----------------------|---------------------------------------------------------------------------------------------------------------------------------------------------------------------------------------------------------|
| Casos utilizados |                      | As estatísticas para cada análise são baseadas nos casos sem dados omissos ou fora do intervalo para qualquer variável da análise.                                                                      |
| Sintaxe          |                      | T-TEST GROUPS=RsPrgType(0 1)<br>/MISSING=ANALYSIS<br>/VARIABLES=Age DASS21_D<br>DASS21_A DASS21_S<br>PHQ9_Score BRCS_Score<br>OLBI_D OLBI_E OLBI_Total<br>Autonomy<br>PedagStruct<br>/CRITERIA=CI(.95). |
| Recursos         | Tempo do processador | 00:00:00,02                                                                                                                                                                                             |
|                  | Tempo decorrido      | 00:00:00,03                                                                                                                                                                                             |

### Estatísticas de grupo

|                                                                                            | Type of residency program | N   | Média  | Erro Desvio | Erro padrão da média |
|--------------------------------------------------------------------------------------------|---------------------------|-----|--------|-------------|----------------------|
| Age                                                                                        | Non-Medical (Other HCP)   | 599 | 26,44  | 4,407       | ,180                 |
|                                                                                            | Medical                   | 631 | 29,21  | 3,968       | ,158                 |
| DASS21 Depression Score                                                                    | Non-Medical (Other HCP)   | 639 | 7,64   | 5,464       | ,216                 |
|                                                                                            | Medical                   | 674 | 7,64   | 5,835       | ,225                 |
| DASS21 Anxiety Score                                                                       | Non-Medical (Other HCP)   | 639 | 6,61   | 5,255       | ,208                 |
|                                                                                            | Medical                   | 674 | 5,48   | 5,000       | ,193                 |
| DASS21 Stress Score                                                                        | Non-Medical (Other HCP)   | 639 | 10,27  | 5,275       | ,209                 |
|                                                                                            | Medical                   | 674 | 10,04  | 5,468       | ,211                 |
| PHQ9 Depression Score                                                                      | Non-Medical (Other HCP)   | 639 | 12,31  | 6,277       | ,248                 |
|                                                                                            | Medical                   | 674 | 11,71  | 6,605       | ,254                 |
| BRCS Score                                                                                 | Non-Medical (Other HCP)   | 639 | 12,26  | 3,654       | ,145                 |
|                                                                                            | Medical                   | 674 | 12,56  | 3,882       | ,150                 |
| OLBI Disengagement Score                                                                   | Non-Medical (Other HCP)   | 639 | 2,7365 | ,81289      | ,03216               |
|                                                                                            | Medical                   | 674 | 2,8095 | ,86305      | ,03324               |
| OLBI Exhaustion Score                                                                      | Non-Medical (Other HCP)   | 639 | 3,5808 | ,69267      | ,02740               |
|                                                                                            | Medical                   | 674 | 3,5298 | ,77501      | ,02985               |
| OLBI Total Score                                                                           | Non-Medical (Other HCP)   | 639 | 3,1586 | ,66095      | ,02615               |
|                                                                                            | Medical                   | 674 | 3,1698 | ,73517      | ,02832               |
| Na sua opinião, qual o seu grau de autonomia para decidir condutas no trabalho? (EAV 1-10) | Non-Medical (Other HCP)   | 639 | 6,58   | 2,095       | ,083                 |
|                                                                                            | Medical                   | 674 | 6,43   | 2,115       | ,081                 |
| Na sua opinião, qual o grau de                                                             | Non-Medical (Other HCP)   | 639 | 5,34   | 2,502       | ,099                 |

|                                                                                            |         |     |      |       |      |
|--------------------------------------------------------------------------------------------|---------|-----|------|-------|------|
| adequação da organização pedagógica de seu programa de residência profissional? (EAV 1-10) | Medical | 674 | 6,18 | 2,368 | ,091 |
|--------------------------------------------------------------------------------------------|---------|-----|------|-------|------|

| Teste de amostras independentes                                                            |                                 |                                              |      |         |          |                                  |                 |                          |                                         |          |
|--------------------------------------------------------------------------------------------|---------------------------------|----------------------------------------------|------|---------|----------|----------------------------------|-----------------|--------------------------|-----------------------------------------|----------|
|                                                                                            |                                 | Teste de Levene para igualdade de variâncias |      |         |          | teste-t para Igualdade de Médias |                 |                          |                                         |          |
|                                                                                            |                                 |                                              |      |         |          | Sig. (2 extremidades)            | Diferença média | Erro padrão de diferença | 95% Intervalo de Confiança da Diferença |          |
|                                                                                            |                                 | Z                                            | Sig. | t       | df       |                                  |                 |                          | Inferior                                | Superior |
| Age                                                                                        | Variâncias iguais assumidas     | 1,093                                        | ,296 | -11,583 | 1228     | ,000                             | -2,767          | ,239                     | -3,236                                  | -2,298   |
|                                                                                            | Variâncias iguais não assumidas |                                              |      | -11,551 | 1198,790 | ,000                             | -2,767          | ,240                     | -3,237                                  | -2,297   |
| DASS21 Depression Score                                                                    | Variâncias iguais assumidas     | 4,245                                        | ,040 | ,022    | 1311     | ,983                             | ,007            | ,312                     | -,606                                   | ,620     |
|                                                                                            | Variâncias iguais não assumidas |                                              |      | ,022    | 1310,797 | ,983                             | ,007            | ,312                     | -,605                                   | ,619     |
| DASS21 Anxiety Score                                                                       | Variâncias iguais assumidas     | 1,973                                        | ,160 | 3,986   | 1311     | ,000                             | 1,128           | ,283                     | ,573                                    | 1,683    |
|                                                                                            | Variâncias iguais não assumidas |                                              |      | 3,981   | 1297,238 | ,000                             | 1,128           | ,283                     | ,572                                    | 1,684    |
| DASS21 Stress Score                                                                        | Variâncias iguais assumidas     | 1,084                                        | ,298 | ,757    | 1311     | ,449                             | ,225            | ,297                     | -,358                                   | ,807     |
|                                                                                            | Variâncias iguais não assumidas |                                              |      | ,758    | 1310,599 | ,449                             | ,225            | ,297                     | -,357                                   | ,806     |
| PHQ9 Depression Score                                                                      | Variâncias iguais assumidas     | 1,906                                        | ,168 | 1,687   | 1311     | ,092                             | ,601            | ,356                     | -,098                                   | 1,299    |
|                                                                                            | Variâncias iguais não assumidas |                                              |      | 1,689   | 1310,992 | ,091                             | ,601            | ,356                     | -,097                                   | 1,298    |
| BRCS Score                                                                                 | Variâncias iguais assumidas     | 2,612                                        | ,106 | -1,423  | 1311     | ,155                             | -,297           | ,208                     | -,705                                   | ,112     |
|                                                                                            | Variâncias iguais não assumidas |                                              |      | -1,426  | 1310,932 | ,154                             | -,297           | ,208                     | -,705                                   | ,111     |
| OLBI Disengagement Score                                                                   | Variâncias iguais assumidas     | 3,509                                        | ,061 | -1,576  | 1311     | ,115                             | -,07303         | ,04633                   | -,16391                                 | ,01785   |
|                                                                                            | Variâncias iguais não assumidas |                                              |      | -1,579  | 1310,945 | ,115                             | -,07303         | ,04625                   | -,16377                                 | ,01771   |
| OLBI Exhaustion Score                                                                      | Variâncias iguais assumidas     | 7,257                                        | ,007 | 1,256   | 1311     | ,209                             | ,05105          | ,04064                   | -,02868                                 | ,13078   |
|                                                                                            | Variâncias iguais não assumidas |                                              |      | 1,260   | 1306,487 | ,208                             | ,05105          | ,04052                   | -,02844                                 | ,13055   |
| OLBI Total Score                                                                           | Variâncias iguais assumidas     | 7,200                                        | ,007 | -,290   | 1311     | ,772                             | -,01120         | ,03865                   | -,08703                                 | ,06463   |
|                                                                                            | Variâncias iguais não assumidas |                                              |      | -,291   | 1307,339 | ,771                             | -,01120         | ,03854                   | -,08681                                 | ,06441   |
| Na sua opinião, qual o seu grau de autonomia para decidir condutas no trabalho? (EAV 1-10) | Variâncias iguais assumidas     | ,060                                         | ,806 | 1,308   | 1311     | ,191                             | ,152            | ,116                     | -,076                                   | ,380     |
|                                                                                            | Variâncias iguais não assumidas |                                              |      | 1,308   | 1308,479 | ,191                             | ,152            | ,116                     | -,076                                   | ,380     |
| Na sua opinião, qual o grau de                                                             | Variâncias iguais assumidas     | 6,264                                        | ,012 | -6,248  | 1311     | ,000                             | -,840           | ,134                     | -1,103                                  | -,576    |

|                             |                       |  |  |        |          |      |       |      |        |       |
|-----------------------------|-----------------------|--|--|--------|----------|------|-------|------|--------|-------|
| adequação da organização    | Variâncias iguais não |  |  | -6,239 | 1295,838 | ,000 | -,840 | ,135 | -1,104 | -,576 |
| pedagógica de seu programa  | assumidas             |  |  |        |          |      |       |      |        |       |
| de residência profissional? |                       |  |  |        |          |      |       |      |        |       |
| (EAV 1-10)                  |                       |  |  |        |          |      |       |      |        |       |

## CORRELATIONS

```
/VARIABLES=DASS21_D DASS21_A DASS21_S PHQ9_Score BRCS_Score OLBI_D OLBI_E OLBI_Total Autonomy
PedagStruct PPEAvail_Classif ExternWork CovidCare Wkload_6060
```

```
/PRINT=TWOTAIL NOSIG
```

```
/MISSING=PAIRWISE.
```

## Correlações

### Observações

|                             |                                             |                                                                                                                                                                                                                                                |
|-----------------------------|---------------------------------------------|------------------------------------------------------------------------------------------------------------------------------------------------------------------------------------------------------------------------------------------------|
| Saída criada                |                                             | 20-SEP-2020 12:30:35                                                                                                                                                                                                                           |
| Comentários                 |                                             |                                                                                                                                                                                                                                                |
| Entrada                     | Dados                                       | C:\Users\User\Documents\Pesquisa\Fellow\FellowGenData_V1.sav                                                                                                                                                                                   |
|                             | Conjunto de dados ativo                     | ConjuntodeDados1                                                                                                                                                                                                                               |
|                             | Filtro                                      | <none>                                                                                                                                                                                                                                         |
|                             | Ponderação                                  | <none>                                                                                                                                                                                                                                         |
|                             | Arquivo Dividido                            | <none>                                                                                                                                                                                                                                         |
|                             | N de linhas em arquivo de dados de trabalho | 1313                                                                                                                                                                                                                                           |
| Tratamento de valor omissos | Definição de omissos                        | Os valores omissos definidos pelo usuário são tratados como omissos.                                                                                                                                                                           |
|                             | Casos utilizados                            | As estatísticas para cada par de variáveis são baseadas em todos os casos com dados válidos para aquele par.                                                                                                                                   |
| Sintaxe                     |                                             | CORRELATIONS<br>/VARIABLES=DASS21_D<br>DASS21_A DASS21_S<br>PHQ9_Score BRCS_Score<br>OLBI_D OLBI_E OLBI_Total<br>Autonomy<br>PedagStruct PPEAvail_Classif<br>ExternWork CovidCare<br>Wkload_6060<br>/PRINT=TWOTAIL NOSIG<br>/MISSING=PAIRWISE. |
| Recursos                    | Tempo do processador                        | 00:00:00,02                                                                                                                                                                                                                                    |
|                             | Tempo decorrido                             | 00:00:00,02                                                                                                                                                                                                                                    |

| Correlações |  |  |  |  |  |  |  |  |  |  |  |  |  |  |  |
|-------------|--|--|--|--|--|--|--|--|--|--|--|--|--|--|--|
|             |  |  |  |  |  |  |  |  |  |  |  |  |  |  |  |
|             |  |  |  |  |  |  |  |  |  |  |  |  |  |  |  |
|             |  |  |  |  |  |  |  |  |  |  |  |  |  |  |  |
|             |  |  |  |  |  |  |  |  |  |  |  |  |  |  |  |
|             |  |  |  |  |  |  |  |  |  |  |  |  |  |  |  |
|             |  |  |  |  |  |  |  |  |  |  |  |  |  |  |  |
|             |  |  |  |  |  |  |  |  |  |  |  |  |  |  |  |
|             |  |  |  |  |  |  |  |  |  |  |  |  |  |  |  |
|             |  |  |  |  |  |  |  |  |  |  |  |  |  |  |  |
|             |  |  |  |  |  |  |  |  |  |  |  |  |  |  |  |
|             |  |  |  |  |  |  |  |  |  |  |  |  |  |  |  |
|             |  |  |  |  |  |  |  |  |  |  |  |  |  |  |  |
|             |  |  |  |  |  |  |  |  |  |  |  |  |  |  |  |
|             |  |  |  |  |  |  |  |  |  |  |  |  |  |  |  |
|             |  |  |  |  |  |  |  |  |  |  |  |  |  |  |  |
|             |  |  |  |  |  |  |  |  |  |  |  |  |  |  |  |
|             |  |  |  |  |  |  |  |  |  |  |  |  |  |  |  |
|             |  |  |  |  |  |  |  |  |  |  |  |  |  |  |  |
|             |  |  |  |  |  |  |  |  |  |  |  |  |  |  |  |
|             |  |  |  |  |  |  |  |  |  |  |  |  |  |  |  |
|             |  |  |  |  |  |  |  |  |  |  |  |  |  |  |  |
|             |  |  |  |  |  |  |  |  |  |  |  |  |  |  |  |
|             |  |  |  |  |  |  |  |  |  |  |  |  |  |  |  |
|             |  |  |  |  |  |  |  |  |  |  |  |  |  |  |  |
|             |  |  |  |  |  |  |  |  |  |  |  |  |  |  |  |
|             |  |  |  |  |  |  |  |  |  |  |  |  |  |  |  |
|             |  |  |  |  |  |  |  |  |  |  |  |  |  |  |  |
|             |  |  |  |  |  |  |  |  |  |  |  |  |  |  |  |
|             |  |  |  |  |  |  |  |  |  |  |  |  |  |  |  |
|             |  |  |  |  |  |  |  |  |  |  |  |  |  |  |  |
|             |  |  |  |  |  |  |  |  |  |  |  |  |  |  |  |
|             |  |  |  |  |  |  |  |  |  |  |  |  |  |  |  |
|             |  |  |  |  |  |  |  |  |  |  |  |  |  |  |  |
|             |  |  |  |  |  |  |  |  |  |  |  |  |  |  |  |
|             |  |  |  |  |  |  |  |  |  |  |  |  |  |  |  |
|             |  |  |  |  |  |  |  |  |  |  |  |  |  |  |  |
|             |  |  |  |  |  |  |  |  |  |  |  |  |  |  |  |
|             |  |  |  |  |  |  |  |  |  |  |  |  |  |  |  |
|             |  |  |  |  |  |  |  |  |  |  |  |  |  |  |  |
|             |  |  |  |  |  |  |  |  |  |  |  |  |  |  |  |
|             |  |  |  |  |  |  |  |  |  |  |  |  |  |  |  |
|             |  |  |  |  |  |  |  |  |  |  |  |  |  |  |  |
|             |  |  |  |  |  |  |  |  |  |  |  |  |  |  |  |
|             |  |  |  |  |  |  |  |  |  |  |  |  |  |  |  |
|             |  |  |  |  |  |  |  |  |  |  |  |  |  |  |  |
|             |  |  |  |  |  |  |  |  |  |  |  |  |  |  |  |
|             |  |  |  |  |  |  |  |  |  |  |  |  |  |  |  |
|             |  |  |  |  |  |  |  |  |  |  |  |  |  |  |  |
|             |  |  |  |  |  |  |  |  |  |  |  |  |  |  |  |
|             |  |  |  |  |  |  |  |  |  |  |  |  |  |  |  |
|             |  |  |  |  |  |  |  |  |  |  |  |  |  |  |  |
|             |  |  |  |  |  |  |  |  |  |  |  |  |  |  |  |
|             |  |  |  |  |  |  |  |  |  |  |  |  |  |  |  |
|             |  |  |  |  |  |  |  |  |  |  |  |  |  |  |  |
|             |  |  |  |  |  |  |  |  |  |  |  |  |  |  |  |
|             |  |  |  |  |  |  |  |  |  |  |  |  |  |  |  |
|             |  |  |  |  |  |  |  |  |  |  |  |  |  |  |  |
|             |  |  |  |  |  |  |  |  |  |  |  |  |  |  |  |
|             |  |  |  |  |  |  |  |  |  |  |  |  |  |  |  |
|             |  |  |  |  |  |  |  |  |  |  |  |  |  |  |  |
|             |  |  |  |  |  |  |  |  |  |  |  |  |  |  |  |
|             |  |  |  |  |  |  |  |  |  |  |  |  |  |  |  |
|             |  |  |  |  |  |  |  |  |  |  |  |  |  |  |  |
|             |  |  |  |  |  |  |  |  |  |  |  |  |  |  |  |
|             |  |  |  |  |  |  |  |  |  |  |  |  |  |  |  |
|             |  |  |  |  |  |  |  |  |  |  |  |  |  |  |  |
|             |  |  |  |  |  |  |  |  |  |  |  |  |  |  |  |
|             |  |  |  |  |  |  |  |  |  |  |  |  |  |  |  |
|             |  |  |  |  |  |  |  |  |  |  |  |  |  |  |  |
|             |  |  |  |  |  |  |  |  |  |  |  |  |  |  |  |
|             |  |  |  |  |  |  |  |  |  |  |  |  |  |  |  |
|             |  |  |  |  |  |  |  |  |  |  |  |  |  |  |  |
|             |  |  |  |  |  |  |  |  |  |  |  |  |  |  |  |
|             |  |  |  |  |  |  |  |  |  |  |  |  |  |  |  |
|             |  |  |  |  |  |  |  |  |  |  |  |  |  |  |  |
|             |  |  |  |  |  |  |  |  |  |  |  |  |  |  |  |
|             |  |  |  |  |  |  |  |  |  |  |  |  |  |  |  |
|             |  |  |  |  |  |  |  |  |  |  |  |  |  |  |  |
|             |  |  |  |  |  |  |  |  |  |  |  |  |  |  |  |
|             |  |  |  |  |  |  |  |  |  |  |  |  |  |  |  |
|             |  |  |  |  |  |  |  |  |  |  |  |  |  |  |  |
|             |  |  |  |  |  |  |  |  |  |  |  |  |  |  |  |
|             |  |  |  |  |  |  |  |  |  |  |  |  |  |  |  |
|             |  |  |  |  |  |  |  |  |  |  |  |  |  |  |  |
|             |  |  |  |  |  |  |  |  |  |  |  |  |  |  |  |
|             |  |  |  |  |  |  |  |  |  |  |  |  |  |  |  |
|             |  |  |  |  |  |  |  |  |  |  |  |  |  |  |  |
|             |  |  |  |  |  |  |  |  |  |  |  |  |  |  |  |
|             |  |  |  |  |  |  |  |  |  |  |  |  |  |  |  |
|             |  |  |  |  |  |  |  |  |  |  |  |  |  |  |  |
|             |  |  |  |  |  |  |  |  |  |  |  |  |  |  |  |
|             |  |  |  |  |  |  |  |  |  |  |  |  |  |  |  |
|             |  |  |  |  |  |  |  |  |  |  |  |  |  |  |  |
|             |  |  |  |  |  |  |  |  |  |  |  |  |  |  |  |
|             |  |  |  |  |  |  |  |  |  |  |  |  |  |  |  |
|             |  |  |  |  |  |  |  |  |  |  |  |  |  |  |  |
|             |  |  |  |  |  |  |  |  |  |  |  |  |  |  |  |
|             |  |  |  |  |  |  |  |  |  |  |  |  |  |  |  |
|             |  |  |  |  |  |  |  |  |  |  |  |  |  |  |  |
|             |  |  |  |  |  |  |  |  |  |  |  |  |  |  |  |
|             |  |  |  |  |  |  |  |  |  |  |  |  |  |  |  |
|             |  |  |  |  |  |  |  |  |  |  |  |  |  |  |  |

|                                     |                       |       |         |       |        |        |      |        |        |       |        |       |        |        |        |
|-------------------------------------|-----------------------|-------|---------|-------|--------|--------|------|--------|--------|-------|--------|-------|--------|--------|--------|
| availability of personal protective | Sig. (2 extremidades) | .000  | .000    | .000  | .000   | .000   | .000 | .000   | .000   | .000  | .000   | .000  | .540   | .133   | .060   |
| equipment, when providing care      | N                     | 1313  | 1313    | 1313  | 1313   | 1313   | 1313 | 1313   | 1313   | 1313  | 1313   | 1313  | 1313   | 1313   | 1313   |
| for patients in the residency       |                       |       |         |       |        |        |      |        |        |       |        |       |        |        |        |
| program                             |                       |       |         |       |        |        |      |        |        |       |        |       |        |        |        |
| The participant exerts professional | Correlação de Pearson | -.032 | -.094** | -.038 | -.038  | .061** | .029 | -.038  | -.003  | .007  | .127** | -.017 | 1      | .362** | .257** |
| activity external to the residency  | Sig. (2 extremidades) | .262  | .001    | .173  | .173   | .027   | .301 | .172   | .824   | .788  | .000   | .540  |        | .000   | .000   |
| program                             | N                     | 1313  | 1313    | 1313  | 1313   | 1313   | 1313 | 1313   | 1313   | 1313  | 1313   | 1313  | 1313   | 1313   | 1313   |
| The participant provides direct     | Correlação de Pearson | .020  | .016    | .026  | .048   | .019   | .014 | .057   | .038   | -.023 | .038   | -.041 | .362** | 1      | .166   |
| health care for COVID19 patients    | Sig. (2 extremidades) | .471  | .553    | .338  | .079   | .499   | .612 | .040   | .166   | .399  | .173   | .133  | .000   |        | .000   |
|                                     | N                     | 1313  | 1313    | 1313  | 1313   | 1313   | 1313 | 1313   | 1313   | 1313  | 1313   | 1313  | 1313   | 1313   | 1313   |
| Cumulative weekly workload < or     | Correlação de Pearson | .044  | .017    | .032  | .077** | .038   | .031 | .108** | .075** | -.022 | .004   | -.052 | .257** | .166** | 1      |
| >= 60h (dichotomous)                | Sig. (2 extremidades) | .108  | .536    | .246  | .005   | .173   | .257 | .000   | .006   | .418  | .880   | .060  | .000   | .000   |        |
|                                     | N                     | 1313  | 1313    | 1313  | 1313   | 1313   | 1313 | 1313   | 1313   | 1313  | 1313   | 1313  | 1313   | 1313   | 1313   |

\*\* . A correlação é significativa no nível 0.01 (2 extremidades).

\* . A correlação é significativa no nível 0.05 (2 extremidades).

```

NONPAR CORR
/VARIABLES=DASS21_D DASS21_A DASS21_S PHQ9_Score BRCS_Score OLBI_D OLBI_E OLBI_Total Autonomy
PedagStruct PPEAvail_Classif ExternWork CovidCare Wkload_6060
/PRINT=SPEARMAN TWOTAIL NOSIG
/MISSING=PAIRWISE.

```

Correlações não paramétricas

| Observações                 |                                                |                                                                                                                       |
|-----------------------------|------------------------------------------------|-----------------------------------------------------------------------------------------------------------------------|
| Saída criada                | 20-SEP-2020 12:30:35                           |                                                                                                                       |
| Comentários                 |                                                |                                                                                                                       |
| Entrada                     | Dados                                          | C:\Users\User\Documents\Pesquis<br>a\Fellow\FellowGenData_V1.sav                                                      |
|                             | Conjunto de dados ativo                        | ConjuntodeDados1                                                                                                      |
|                             | Filtro                                         | <none>                                                                                                                |
|                             | Ponderação                                     | <none>                                                                                                                |
|                             | Arquivo Dividido                               | <none>                                                                                                                |
|                             | N de linhas em arquivo de dados<br>de trabalho | 1313                                                                                                                  |
| Tratamento de valor omissos | Definição de omissos                           | Os valores omissos definidos pelo<br>usuário são tratados como<br>omissos.                                            |
|                             | Casos utilizados                               | As estatísticas para cada par de<br>variáveis são baseadas em todos<br>os casos com dados válidos para<br>aquele par. |

```
NONPAR CORR
  /VARIABLES=DASS21_D
DASS21_A DASS21_S
PHQ9_Score BRCS_Score
OLBI_D OLBI_E OLBI_Total
Autonomy
  PedagStruct PPEAvail_Classif
ExternWork CovidCare
Wkload_6060
  /PRINT=SPEARMAN TWOTAIL
NOSIG
  /MISSING=PAIRWISE.
```

|          |                            |                           |
|----------|----------------------------|---------------------------|
| Recursos | Tempo do processador       | 00:00:00,03               |
|          | Tempo decorrido            | 00:00:00,02               |
|          | Número de Casos Permitidos | 185042 casos <sup>a</sup> |

a. Baseado na disponibilidade de memória da área de trabalho

[illegible]

|                                                                                                                                    |                            |         |         |         |         |         |         |         |         |         |         |         |        |        |        |
|------------------------------------------------------------------------------------------------------------------------------------|----------------------------|---------|---------|---------|---------|---------|---------|---------|---------|---------|---------|---------|--------|--------|--------|
| OLBI Exhaustion Score                                                                                                              | Coefficiente de Correlação | .560**  | .495**  | .562**  | .646**  | -.352** | .572**  | 1.000   | .857**  | -.257** | -.345** | -.159** | -.022  | .064   | .106** |
|                                                                                                                                    | Sig. (2 extremidades)      | .000    | .000    | .000    | .000    | .000    | .000    | .       | .000    | .000    | .000    | .000    | .420   | .921   | .000   |
|                                                                                                                                    | N                          | 1313    | 1313    | 1313    | 1313    | 1313    | 1313    | 1313    | 1313    | 1313    | 1313    | 1313    | 1313   | 1313   | 1313   |
| OLBI Total Score                                                                                                                   | Coefficiente de Correlação | .636**  | .474**  | .560**  | .648**  | -.418** | .905**  | .857**  | 1.000   | -.312** | -.442** | -.195** | .003   | .042   | .079** |
|                                                                                                                                    | Sig. (2 extremidades)      | .000    | .000    | .000    | .000    | .000    | .000    | .000    | .       | .000    | .000    | .000    | .922   | .125   | .004   |
|                                                                                                                                    | N                          | 1313    | 1313    | 1313    | 1313    | 1313    | 1313    | 1313    | 1313    | 1313    | 1313    | 1313    | 1313   | 1313   | 1313   |
| Na sua opinião, qual o seu grau de autonomia para decidir condutas no trabalho? (EAV 1-10)                                         | Coefficiente de Correlação | -.260** | -.138** | -.198** | -.237** | .239**  | -.299** | -.257** | -.312** | 1.000   | .303**  | .104**  | .027   | -.028  | -.029  |
|                                                                                                                                    | Sig. (2 extremidades)      | .000    | .000    | .000    | .000    | .000    | .000    | .000    | .       | .000    | .000    | .000    | .328   | .308   | .299   |
|                                                                                                                                    | N                          | 1313    | 1313    | 1313    | 1313    | 1313    | 1313    | 1313    | 1313    | 1313    | 1313    | 1313    | 1313   | 1313   | 1313   |
| Na sua opinião, qual o grau de adequação da organização pedagógica de seu programa de residência profissional? (EAV 1-10)          | Coefficiente de Correlação | -.335** | -.243** | -.296** | -.318** | .218**  | -.437** | -.345** | -.442** | .303**  | 1.000   | .154**  | .134** | .041   | .003   |
|                                                                                                                                    | Sig. (2 extremidades)      | .000    | .000    | .000    | .000    | .000    | .000    | .000    | .000    | .       | .000    | .000    | .139   | .915   |        |
|                                                                                                                                    | N                          | 1313    | 1313    | 1313    | 1313    | 1313    | 1313    | 1313    | 1313    | 1313    | 1313    | 1313    | 1313   | 1313   | 1313   |
| Perceived adequacy of the availability of personal protective equipment, when providing care for patients in the residency program | Coefficiente de Correlação | -.192** | -.154** | -.175** | -.174** | .097**  | -.187** | -.159** | -.195** | .104**  | .154**  | 1.000   | -.017  | -.041  | -.052  |
|                                                                                                                                    | Sig. (2 extremidades)      | .000    | .000    | .000    | .000    | .000    | .000    | .000    | .000    | .000    | .       | .000    | .540   | .133   | .060   |
|                                                                                                                                    | N                          | 1313    | 1313    | 1313    | 1313    | 1313    | 1313    | 1313    | 1313    | 1313    | 1313    | 1313    | 1313   | 1313   | 1313   |
| The participant exerts professional activity external to the residency program                                                     | Coefficiente de Correlação | -.043   | -.103** | -.039   | -.038   | .068**  | .025    | -.022   | .003    | .027    | .134**  | -.017   | 1.000  | .362** | .257** |
|                                                                                                                                    | Sig. (2 extremidades)      | .120    | .000    | .159    | .173    | .014    | .373    | .420    | .922    | .328    | .000    | .540    | .      | .000   | .000   |
|                                                                                                                                    | N                          | 1313    | 1313    | 1313    | 1313    | 1313    | 1313    | 1313    | 1313    | 1313    | 1313    | 1313    | 1313   | 1313   | 1313   |
| The participant provides direct health care for COVID19 patients                                                                   | Coefficiente de Correlação | .018    | .015    | .029    | .050    | .019    | .015    | .064**  | .042    | -.028   | .041    | -.041   | .362** | 1.000  | .166** |
|                                                                                                                                    | Sig. (2 extremidades)      | .518    | .599    | .293    | .072    | .484    | .586    | .021    | .125    | .308    | .139    | .133    | .000   | .      | .000   |
|                                                                                                                                    | N                          | 1313    | 1313    | 1313    | 1313    | 1313    | 1313    | 1313    | 1313    | 1313    | 1313    | 1313    | 1313   | 1313   | 1313   |
| Cumulative weekly workload < or >= 60h (dichotomous)                                                                               | Coefficiente de Correlação | .042    | .013    | .036    | .076**  | .039    | .035    | .106**  | .079**  | -.029   | .003    | -.052   | .257** | .166** | 1.000  |
|                                                                                                                                    | Sig. (2 extremidades)      | .126    | .637    | .197    | .006    | .163    | .200    | .000    | .004    | .299    | .915    | .060    | .000   | .000   | .      |
|                                                                                                                                    | N                          | 1313    | 1313    | 1313    | 1313    | 1313    | 1313    | 1313    | 1313    | 1313    | 1313    | 1313    | 1313   | 1313   | 1313   |

\*\* . A correlação é significativa no nível 0.01 (2 extremidades).

\* . A correlação é significativa no nível 0.05 (2 extremidades).

LOGISTIC REGRESSION VARIABLES DASS21\_Classif\_D2c  
 /METHOD=ENTER ComorbAny BRCS\_Score Autonomy PedagogStruct PPEAvail\_Classif Wkload\_9090  
 /SAVE=COOK ZRESID  
 /CASEWISE OUTLIER(3)  
 /PRINT=GOODFIT CI(95)  
 /CRITERIA=PIN(0.05) POUT(0.10) ITERATE(20) CUT(0.5).

Regressão logística

## Observações

Saída criada

20-SEP-2020 14:27:41

Comentários

|                                  |                                             |                                                                                                                                                                                                                                                                                          |
|----------------------------------|---------------------------------------------|------------------------------------------------------------------------------------------------------------------------------------------------------------------------------------------------------------------------------------------------------------------------------------------|
| Entrada                          | Dados                                       | C:\Users\User\Documents\Pesquisa\Fellow\FellowGenData_V1.sav                                                                                                                                                                                                                             |
|                                  | Conjunto de dados ativo                     | ConjuntodeDados1                                                                                                                                                                                                                                                                         |
|                                  | Filtro                                      | <none>                                                                                                                                                                                                                                                                                   |
|                                  | Ponderação                                  | <none>                                                                                                                                                                                                                                                                                   |
|                                  | Arquivo Dividido                            | <none>                                                                                                                                                                                                                                                                                   |
|                                  | N de linhas em arquivo de dados de trabalho | 1313                                                                                                                                                                                                                                                                                     |
| Tratamento de valor omissos      | Definição de omissos                        | Os valores omissos definidos pelo usuário são tratados como omissos                                                                                                                                                                                                                      |
| Sintaxe                          |                                             | LOGISTIC REGRESSION<br>VARIABLES DASS21_Classif_D2c<br>/METHOD=ENTER ComorbAny<br>BRCS_Score Autonomy<br>PedagStruct PPEAvail_Classif<br>Wkload_9090<br>/SAVE=COOK ZRESID<br>/CASEWISE OUTLIER(3)<br>/PRINT=GOODFIT CI(95)<br>/CRITERIA=PIN(0.05)<br>POUT(0.10) ITERATE(20)<br>CUT(0.5). |
| Recursos                         | Tempo do processador                        | 00:00:00,05                                                                                                                                                                                                                                                                              |
|                                  | Tempo decorrido                             | 00:00:00,04                                                                                                                                                                                                                                                                              |
| Variáveis Criadas ou Modificadas | COO_5                                       | Análogo às estatísticas de influência de Cook                                                                                                                                                                                                                                            |
|                                  | ZRE_5                                       | Resíduo normalizado                                                                                                                                                                                                                                                                      |

### Resumo de processamento do caso

| Casos não ponderados <sup>a</sup> |                     | N    | Porcentagem |
|-----------------------------------|---------------------|------|-------------|
| Casos selecionados                | Incluído na análise | 1305 | 99,4        |
|                                   | Casos omissos       | 8    | ,6          |
|                                   | Total               | 1313 | 100,0       |
| Casos não selecionados            |                     | 0    | ,0          |
| Total                             |                     | 1313 | 100,0       |

a. Se a ponderação estiver em vigor, veja a tabela de classificação para o número total de casos.

### Codificação de variável dependente

| Valor original      | Valor interno |
|---------------------|---------------|
| Normal              | 0             |
| Abnormal (elevated) | 1             |

| Tabela de Classificação <sup>a,b</sup> |                                              |                                                     |                        |  |                        |
|----------------------------------------|----------------------------------------------|-----------------------------------------------------|------------------------|--|------------------------|
|                                        |                                              | Previsto                                            |                        |  | Porcentagem<br>correta |
|                                        |                                              | DASS21 Classification - Depression<br>(dichotomous) |                        |  |                        |
|                                        | Observado                                    | Normal                                              | Abnormal<br>(elevated) |  |                        |
| Passo 0                                | DASS21 Classification - Normal               | 865                                                 | 0                      |  | 100,0                  |
|                                        | Depression (dichotomous) Abnormal (elevated) | 440                                                 | 0                      |  | ,0                     |
|                                        | Porcentagem global                           |                                                     |                        |  | 66,3                   |

a. A constante está incluída no modelo.

b. O valor de recorte é ,500

| Variáveis na equação |           |       |      |         |    |      |        |
|----------------------|-----------|-------|------|---------|----|------|--------|
|                      |           | B     | S.E. | Wald    | df | Sig. | Exp(B) |
| Passo 0              | Constante | -,676 | ,059 | 133,258 | 1  | ,000 | ,509   |

| Variáveis não presentes na equação |                      |                                                                                                                                    |         |       |
|------------------------------------|----------------------|------------------------------------------------------------------------------------------------------------------------------------|---------|-------|
|                                    |                      | Escore                                                                                                                             | df      | Sig.  |
| Passo 0                            | Variáveis            | Any comorbidity (regardless COVID risk)                                                                                            | 37,473  | 1,000 |
|                                    |                      | BRCS Score                                                                                                                         | 140,405 | 1,000 |
|                                    |                      | Na sua opinião, qual o seu grau de autonomia para decidir condutas no trabalho? (EAV 1-10)                                         | 62,560  | 1,000 |
|                                    |                      | Na sua opinião, qual o grau de adequação da organização pedagógica de seu programa de residência profissional? (EAV 1-10)          | 68,495  | 1,000 |
|                                    |                      | Perceived adequacy of the availability of personal protective equipment, when providing care for patients in the residency program | 52,915  | 1,000 |
|                                    |                      | Cumulative weekly workload < or >= 90h (dichotomous)                                                                               | 9,957   | 1,002 |
|                                    | Estatísticas globais | 244,219                                                                                                                            | 6       | ,000  |

Testes de Omnibus do Modelo de Coeficientes

|         |        | Qui-quadrado | df | Sig. |
|---------|--------|--------------|----|------|
| Passo 1 | Passo  | 262,400      | 6  | ,000 |
|         | Bloco  | 262,400      | 6  | ,000 |
|         | Modelo | 262,400      | 6  | ,000 |

Resumo do modelo

| Passo | Verossimilhança de log -2 | R quadrado Cox & Snell | R quadrado Nagelkerke |
|-------|---------------------------|------------------------|-----------------------|
| 1     | 1405,747 <sup>a</sup>     | ,182                   | ,252                  |

a. Estimação finalizada no número de iteração 5 porque as estimativas de parâmetro mudaram foram alteradas para menos de ,001.

Teste de Hosmer e Lemeshow

| Passo | Qui-quadrado | df | Sig. |
|-------|--------------|----|------|
| 1     | 12,270       | 8  | ,140 |

Tabela de contingência para teste de Hosmer e Lemeshow

|         |    | DASS21 Classification - Depression<br>(dichotomous) = Normal |          | DASS21 Classification - Depression<br>(dichotomous) = Abnormal (elevated) |          | Total |
|---------|----|--------------------------------------------------------------|----------|---------------------------------------------------------------------------|----------|-------|
|         |    | Observado                                                    | Esperado | Observado                                                                 | Esperado |       |
| Passo 1 | 1  | 123                                                          | 121,455  | 8                                                                         | 9,545    | 131   |
|         | 2  | 118                                                          | 114,441  | 13                                                                        | 16,559   | 131   |
|         | 3  | 106                                                          | 109,643  | 26                                                                        | 22,357   | 132   |
|         | 4  | 102                                                          | 103,807  | 30                                                                        | 28,193   | 132   |
|         | 5  | 86                                                           | 96,419   | 45                                                                        | 34,581   | 131   |
|         | 6  | 95                                                           | 87,916   | 36                                                                        | 43,084   | 131   |
|         | 7  | 75                                                           | 78,778   | 56                                                                        | 52,222   | 131   |
|         | 8  | 77                                                           | 68,229   | 54                                                                        | 62,771   | 131   |
|         | 9  | 59                                                           | 55,463   | 72                                                                        | 75,537   | 131   |
|         | 10 | 24                                                           | 28,849   | 100                                                                       | 95,151   | 124   |

Tabela de Classificação<sup>a</sup>

|           |  | Previsto                                            |  |                        |
|-----------|--|-----------------------------------------------------|--|------------------------|
|           |  | DASS21 Classification - Depression<br>(dichotomous) |  | Porcentagem<br>correta |
| Observado |  |                                                     |  |                        |

|         |                          |                     |        |                        |      |
|---------|--------------------------|---------------------|--------|------------------------|------|
|         |                          |                     | Normal | Abnormal<br>(elevated) |      |
| Passo 1 | DASS21 Classification -  | Normal              | 760    | 105                    | 87,9 |
|         | Depression (dichotomous) | Abnormal (elevated) | 255    | 185                    | 42,0 |
|         | Porcentagem global       |                     |        |                        | 72,4 |

a. O valor de recorte é ,500

|          |                                                                                                                                    | Variáveis na equação |      |         |    |      |        | 95% C.I. para EXP(B) |          |
|----------|------------------------------------------------------------------------------------------------------------------------------------|----------------------|------|---------|----|------|--------|----------------------|----------|
|          |                                                                                                                                    | B                    | S.E. | Wald    | df | Sig. | Exp(B) | Inferior             | Superior |
| Passo 1ª | Any comorbidity (regardless COVID risk)                                                                                            | ,880                 | ,163 | 29,100  | 1  | ,000 | 2,411  | 1,751                | 3,319    |
|          | BRCS Score                                                                                                                         | -,179                | ,019 | 86,554  | 1  | ,000 | ,836   | ,805                 | ,868     |
|          | Na sua opinião, qual o seu grau de autonomia para decidir condutas no trabalho? (EAV 1-10)                                         | -,107                | ,032 | 10,889  | 1  | ,001 | ,898   | ,843                 | ,957     |
|          | Na sua opinião, qual o grau de adequação da organização pedagógica de seu programa de residência profissional? (EAV 1-10)          | -,110                | ,028 | 15,419  | 1  | ,000 | ,896   | ,848                 | ,946     |
|          | Perceived adequacy of the availability of personal protective equipment, when providing care for patients in the residency program | -,798                | ,153 | 27,286  | 1  | ,000 | ,450   | ,334                 | ,607     |
|          | Cumulative weekly workload < or >= 90h (dichotomous)                                                                               | ,537                 | ,251 | 4,587   | 1  | ,032 | 1,711  | 1,047                | 2,798    |
|          | Constante                                                                                                                          | 3,171                | ,315 | 101,132 | 1  | ,000 | 23,836 |                      |          |

a. Variável(is) inserida(s) no passo 1: Any comorbidity (regardless COVID risk), BRCS Score, Na sua opinião, qual o seu grau de autonomia para decidir condutas no trabalho? (EAV 1-10), Na sua opinião, qual o grau de adequação da organização pedagógica de seu programa de residência profissional? (EAV 1-10), Perceived adequacy of the availability of personal protective equipment, when providing care for patients in the residency program, Cumulative weekly workload < or >= 90h (dichotomous).

Lista entre casos<sup>a</sup>

a. O plot entre casos não é produzido porque nenhum valor discrepante foi encontrado.

```
LOGISTIC REGRESSION VARIABLES DASS21_Classif_A2c
/METHOD=ENTER Sex ComorbAny BRCS_Score Autonomy PedagStruct PPEAvail_Classif Wkload_9090
  ExternWork UnivHosp RsPrgType
/SAVE=COOK ZRESID
/CASEWISE OUTLIER(3)
```

/PRINT=GOODFIT CI(95)  
/CRITERIA=PIN(0.05) POUT(0.10) ITERATE(20) CUT(0.5).

Regressão logística

### Observações

|                                  |                                             |                                                                                                                                                                                                                                                                                                                                  |
|----------------------------------|---------------------------------------------|----------------------------------------------------------------------------------------------------------------------------------------------------------------------------------------------------------------------------------------------------------------------------------------------------------------------------------|
| Saída criada                     |                                             | 20-SEP-2020 18:33:29                                                                                                                                                                                                                                                                                                             |
| Comentários                      |                                             |                                                                                                                                                                                                                                                                                                                                  |
| Entrada                          | Dados                                       | C:\Users\User\Documents\Pesquisa\Fellow\FellowGenData_V1.sav                                                                                                                                                                                                                                                                     |
|                                  | Conjunto de dados ativo                     | ConjuntodeDados1                                                                                                                                                                                                                                                                                                                 |
|                                  | Filtro                                      | <none>                                                                                                                                                                                                                                                                                                                           |
|                                  | Ponderação                                  | <none>                                                                                                                                                                                                                                                                                                                           |
|                                  | Arquivo Dividido                            | <none>                                                                                                                                                                                                                                                                                                                           |
|                                  | N de linhas em arquivo de dados de trabalho | 1313                                                                                                                                                                                                                                                                                                                             |
| Tratamento de valor omissos      | Definição de omissos                        | Os valores omissos definidos pelo usuário são tratados como omissos                                                                                                                                                                                                                                                              |
| Sintaxe                          |                                             | LOGISTIC REGRESSION<br>VARIABLES DASS21_Classif_A2c<br>/METHOD=ENTER Sex<br>ComorbAny BRCS_Score<br>Autonomy PedagStruct<br>PPEAvail_Classif Wkload_9090<br>ExternWork UnivHosp<br>RsPrgType<br>/SAVE=COOK ZRESID<br>/CASEWISE OUTLIER(3)<br>/PRINT=GOODFIT CI(95)<br>/CRITERIA=PIN(0.05)<br>POUT(0.10) ITERATE(20)<br>CUT(0.5). |
| Recursos                         | Tempo do processador                        | 00:00:00,03                                                                                                                                                                                                                                                                                                                      |
|                                  | Tempo decorrido                             | 00:00:00,04                                                                                                                                                                                                                                                                                                                      |
| Variáveis Criadas ou Modificadas | COO_8                                       | Análogo às estatísticas de influência de Cook                                                                                                                                                                                                                                                                                    |
|                                  | ZRE_8                                       | Resíduo normalizado                                                                                                                                                                                                                                                                                                              |

### Resumo de processamento do caso

| Casos não ponderados <sup>a</sup> |                     | N    | Porcentagem |
|-----------------------------------|---------------------|------|-------------|
| Casos selecionados                | Incluído na análise | 1302 | 99,2        |
|                                   | Casos omissos       | 11   | ,8          |

|                        |      |       |
|------------------------|------|-------|
| Total                  | 1313 | 100,0 |
| Casos não selecionados | 0    | ,0    |
| Total                  | 1313 | 100,0 |

a. Se a ponderação estiver em vigor, veja a tabela de classificação para o número total de casos.

### Codificação de variável dependente

| Valor original      | Valor interno |
|---------------------|---------------|
| Normal              | 0             |
| Abnormal (elevated) | 1             |

Bloco 0: Bloco Inicial

Tabela de Classificação<sup>a,b</sup>

|         |                                                  | Previsto                                         |                        |                        |
|---------|--------------------------------------------------|--------------------------------------------------|------------------------|------------------------|
|         |                                                  | DASS21 Classification - Anxiety<br>(dichotomous) |                        |                        |
|         | Observado                                        | Normal                                           | Abnormal<br>(elevated) | Porcentagem<br>correta |
| Passo 0 | DASS21 Classification - Anxiety<br>(dichotomous) | Normal                                           | 854                    | 0                      |
|         |                                                  | Abnormal (elevated)                              | 448                    | 0                      |
|         | Porcentagem global                               |                                                  |                        | 65,6                   |

- a. A constante está incluída no modelo.
- b. O valor de recorte é ,500

### Variáveis na equação

|         |           | B     | S.E. | Wald    | df | Sig. | Exp(B) |
|---------|-----------|-------|------|---------|----|------|--------|
| Passo 0 | Constante | -,645 | ,058 | 122,301 | 1  | ,000 | ,525   |

### Variáveis não presentes na equação

|         |           | Escore                                                                                     | df     | Sig. |
|---------|-----------|--------------------------------------------------------------------------------------------|--------|------|
| Passo 0 | Variáveis | Sex                                                                                        | 9,736  | 1    |
|         |           | Any comorbidity (regardless COVID risk)                                                    | 19,777 | 1    |
|         |           | BRCS Score                                                                                 | 63,779 | 1    |
|         |           | Na sua opinião, qual o seu grau de autonomia para decidir condutas no trabalho? (EAV 1-10) | 20,735 | 1    |
|         |           |                                                                                            |        |      |

|                      |                                                                                                                                    |         |    |      |
|----------------------|------------------------------------------------------------------------------------------------------------------------------------|---------|----|------|
|                      | Na sua opinião, qual o grau de adequação da organização pedagógica de seu programa de residência profissional? (EAV 1-10)          | 54,934  | 1  | ,000 |
|                      | Perceived adequacy of the availability of personal protective equipment, when providing care for patients in the residency program | 23,903  | 1  | ,000 |
|                      | Cumulative weekly workload < or >= 90h (dichotomous)                                                                               | ,056    | 1  | ,812 |
|                      | The participant exerts professional activity external to the residency program                                                     | 6,135   | 1  | ,013 |
|                      | The institution is a university hospital                                                                                           | 5,419   | 1  | ,020 |
|                      | Type of residency program                                                                                                          | 6,524   | 1  | ,011 |
| Estatísticas globais |                                                                                                                                    | 141,664 | 10 | ,000 |

Bloco 1: Método = Enter

### Testes de Omnibus do Modelo de Coeficientes

|         |        | Qui-quadrado | df | Sig. |
|---------|--------|--------------|----|------|
| Passo 1 | Passo  | 148,581      | 10 | ,000 |
|         | Bloco  | 148,581      | 10 | ,000 |
|         | Modelo | 148,581      | 10 | ,000 |

### Resumo do modelo

| Passo | Verossimilhança de log -2 | R quadrado Cox & Snell | R quadrado Nagelkerke |
|-------|---------------------------|------------------------|-----------------------|
| 1     | 1527,636 <sup>a</sup>     | ,108                   | ,149                  |

a. Estimação finalizada no número de iteração 4 porque as estimativas de parâmetro mudaram foram alteradas para menos de ,001.

### Teste de Hosmer e Lemeshow

| Passo | Qui-quadrado | df | Sig. |
|-------|--------------|----|------|
| 1     | 4,217        | 8  | ,837 |

**Tabela de contingência para teste de Hosmer e Lemeshow**

|         |    | DASS21 Classification - Anxiety<br>(dichotomous) = Normal |          | DASS21 Classification - Anxiety<br>(dichotomous) = Abnormal (elevated) |          | Total |
|---------|----|-----------------------------------------------------------|----------|------------------------------------------------------------------------|----------|-------|
|         |    | Observado                                                 | Esperado | Observado                                                              | Esperado |       |
| Passo 1 | 1  | 111                                                       | 114,846  | 19                                                                     | 15,154   | 130   |
|         | 2  | 108                                                       | 106,895  | 22                                                                     | 23,105   | 130   |
|         | 3  | 100                                                       | 101,053  | 30                                                                     | 28,947   | 130   |
|         | 4  | 101                                                       | 95,949   | 29                                                                     | 34,051   | 130   |
|         | 5  | 89                                                        | 90,829   | 41                                                                     | 39,171   | 130   |
|         | 6  | 82                                                        | 85,143   | 48                                                                     | 44,857   | 130   |
|         | 7  | 85                                                        | 79,177   | 45                                                                     | 50,823   | 130   |
|         | 8  | 73                                                        | 72,298   | 58                                                                     | 58,702   | 131   |
|         | 9  | 59                                                        | 62,579   | 71                                                                     | 67,421   | 130   |
|         | 10 | 46                                                        | 45,229   | 85                                                                     | 85,771   | 131   |

**Tabela de Classificação<sup>a</sup>**

|         |                                        | Previsto<br>DASS21 Classification - Anxiety<br>(dichotomous) |                        | Porcentagem<br>correta |
|---------|----------------------------------------|--------------------------------------------------------------|------------------------|------------------------|
|         |                                        | Normal                                                       | Abnormal<br>(elevated) |                        |
| Passo 1 | DASS21 Classification - Anxiety Normal | 771                                                          | 83                     | 90,3                   |
|         | (dichotomous) Abnormal (elevated)      | 315                                                          | 133                    | 29,7                   |
|         | Porcentagem global                     |                                                              |                        | 69,4                   |

a. O valor de recorte é ,500

**Variáveis na equação**

|                      |                                                                                                                           | B     | S.E. | Wald   | df | Sig. | Exp(B) | 95% C.I. para EXP(B) |          |
|----------------------|---------------------------------------------------------------------------------------------------------------------------|-------|------|--------|----|------|--------|----------------------|----------|
|                      |                                                                                                                           |       |      |        |    |      |        | Inferior             | Superior |
| Passo 1 <sup>a</sup> | Sex                                                                                                                       | ,537  | ,164 | 10,722 | 1  | ,001 | 1,711  | 1,240                | 2,359    |
|                      | Any comorbidity (regardless COVID risk)                                                                                   | ,621  | ,156 | 15,882 | 1  | ,000 | 1,860  | 1,371                | 2,524    |
|                      | BRCS Score                                                                                                                | -,107 | ,018 | 36,274 | 1  | ,000 | ,899   | ,868                 | ,931     |
|                      | Na sua opinião, qual o seu grau de autonomia para decidir condutas no trabalho? (EAV 1-10)                                | -,034 | ,031 | 1,197  | 1  | ,274 | ,966   | ,909                 | 1,027    |
|                      | Na sua opinião, qual o grau de adequação da organização pedagógica de seu programa de residência profissional? (EAV 1-10) | -,121 | ,027 | 19,666 | 1  | ,000 | ,886   | ,840                 | ,935     |

|                                                                                                                                    |       |      |        |   |      |       |      |       |
|------------------------------------------------------------------------------------------------------------------------------------|-------|------|--------|---|------|-------|------|-------|
| Perceived adequacy of the availability of personal protective equipment, when providing care for patients in the residency program | -.522 | ,148 | 12,462 | 1 | ,000 | ,593  | ,444 | ,793  |
| Cumulative weekly workload < or >= 90h (dichotomous)                                                                               | -.005 | ,259 | ,000   | 1 | ,985 | ,995  | ,599 | 1,655 |
| The participant exerts professional activity external to the residency program                                                     | -.066 | ,178 | ,137   | 1 | ,711 | ,936  | ,660 | 1,327 |
| The institution is a university hospital                                                                                           | -.495 | ,197 | 6,302  | 1 | ,012 | ,609  | ,414 | ,897  |
| Type of residency program                                                                                                          | -.151 | ,167 | ,819   | 1 | ,366 | ,860  | ,620 | 1,192 |
| Constante                                                                                                                          | 1,939 | ,371 | 27,271 | 1 | ,000 | 6,951 |      |       |

a. Variável(is) inserida(s) no passo 1: Sex, Any comorbidity (regardless COVID risk), BRCS Score, Na sua opinião, qual o seu grau de autonomia para decidir condutas no trabalho? (EAV 1-10), Na sua opinião, qual o grau de adequação da organização pedagógica de seu programa de residência profissional? (EAV 1-10), Perceived adequacy of the availability of personal protective equipment, when providing care for patients in the residency program, Cumulative weekly workload < or >= 90h (dichotomous), The participant exerts professional activity external to the residency program, The institution is a university hospital, Type of residency program.

### Lista entre casos<sup>a</sup>

a. O plot entre casos não é produzido porque nenhum valor discrepante foi encontrado.

```
LOGISTIC REGRESSION VARIABLES PHQ9_Classif
/METHOD=ENTER Sex ComorbAny BRCS_Score Autonomy PedagStruct PPEAvail_Classif Wkload_6060 UnivHosp
/SAVE=COOK ZRESID
/CASEWISE OUTLIER(3)
/PRINT=GOODFIT CI(95)
/CRITERIA=PIN(0.05) POUT(0.10) ITERATE(20) CUT(0.5).
```

Regressão logística

| Observações  |                         |                                                              |
|--------------|-------------------------|--------------------------------------------------------------|
| Saída criada | 20-SEP-2020 18:47:55    |                                                              |
| Comentários  |                         |                                                              |
| Entrada      | Dados                   | C:\Users\User\Documents\Pesquisa\Fellow\FellowGenData_V1.sav |
|              | Conjunto de dados ativo | ConjuntodeDados1                                             |
|              | Filtro                  | <none>                                                       |
|              | Ponderação              | <none>                                                       |

|                                  |                                             |                                                                                                                                                                                                                                                                                                    |
|----------------------------------|---------------------------------------------|----------------------------------------------------------------------------------------------------------------------------------------------------------------------------------------------------------------------------------------------------------------------------------------------------|
|                                  | Arquivo Dividido                            | <none>                                                                                                                                                                                                                                                                                             |
|                                  | N de linhas em arquivo de dados de trabalho | 1313                                                                                                                                                                                                                                                                                               |
| Tratamento de valor omisso       | Definição de omisso                         | Os valores omissos definidos pelo usuário são tratados como omissos                                                                                                                                                                                                                                |
| Sintaxe                          |                                             | LOGISTIC REGRESSION<br>VARIABLES PHQ9_Classif<br>/METHOD=ENTER Sex<br>ComorbAny BRCS_Score<br>Autonomy PedagStruct<br>PPEAvail_Classif Wkload_6060<br>UnivHosp<br>/SAVE=COOK ZRESID<br>/CASEWISE OUTLIER(3)<br>/PRINT=GOODFIT CI(95)<br>/CRITERIA=PIN(0.05)<br>POUT(0.10) ITERATE(20)<br>CUT(0.5). |
| Recursos                         | Tempo do processador                        | 00:00:00,05                                                                                                                                                                                                                                                                                        |
|                                  | Tempo decorrido                             | 00:00:00,04                                                                                                                                                                                                                                                                                        |
| Variáveis Criadas ou Modificadas | COO_10                                      | Análogo às estatísticas de influência de Cook                                                                                                                                                                                                                                                      |
|                                  | ZRE_10                                      | Resíduo normalizado                                                                                                                                                                                                                                                                                |

### Resumo de processamento do caso

| Casos não ponderados <sup>a</sup> |                     | N    | Porcentagem |
|-----------------------------------|---------------------|------|-------------|
| Casos selecionados                | Incluído na análise | 1302 | 99,2        |
|                                   | Casos omissos       | 11   | ,8          |
|                                   | Total               | 1313 | 100,0       |
| Casos não selecionados            |                     | 0    | ,0          |
| Total                             |                     | 1313 | 100,0       |

a. Se a ponderação estiver em vigor, veja a tabela de classificação para o número total de casos.

### Codificação de variável dependente

| Valor original | Valor interno |
|----------------|---------------|
| Low            | 0             |
| High           | 1             |

**Tabela de Classificação<sup>a,b</sup>**

|         |                                                            |      | Previsto                                                                                    |      |                     |
|---------|------------------------------------------------------------|------|---------------------------------------------------------------------------------------------|------|---------------------|
|         |                                                            |      | PHQ9 Depression Classification - Risk estimate for having current major depressive disorder |      | Porcentagem correta |
|         | Observado                                                  |      | Low                                                                                         | High |                     |
| Passo 0 | PHQ9 Depression Classification - Low                       |      | 0                                                                                           | 427  | ,0                  |
|         | Risk estimate for having current major depressive disorder | High | 0                                                                                           | 875  | 100,0               |
|         | Porcentagem global                                         |      |                                                                                             |      | 67,2                |

a. A constante está incluída no modelo.

b. O valor de recorte é ,500

**Variáveis na equação**

|         |           | B    | S.E. | Wald    | df | Sig. | Exp(B) |
|---------|-----------|------|------|---------|----|------|--------|
| Passo 0 | Constante | ,717 | ,059 | 147,705 | 1  | ,000 | 2,049  |

**Variáveis não presentes na equação**

|         |                      |                                                                                                                                    | Escore  | df | Sig. |
|---------|----------------------|------------------------------------------------------------------------------------------------------------------------------------|---------|----|------|
| Passo 0 | Variáveis            | Sex                                                                                                                                | 11,357  | 1  | ,001 |
|         |                      | Any comorbidity (regardless COVID risk)                                                                                            | 22,996  | 1  | ,000 |
|         |                      | BRCS Score                                                                                                                         | 123,917 | 1  | ,000 |
|         |                      | Na sua opinião, qual o seu grau de autonomia para decidir condutas no trabalho? (EAV 1-10)                                         | 32,001  | 1  | ,000 |
|         |                      | Na sua opinião, qual o grau de adequação da organização pedagógica de seu programa de residência profissional? (EAV 1-10)          | 82,501  | 1  | ,000 |
|         |                      | Perceived adequacy of the availability of personal protective equipment, when providing care for patients in the residency program | 22,835  | 1  | ,000 |
|         |                      | Cumulative weekly workload < or >= 60h (dichotomous)                                                                               | 5,687   | 1  | ,017 |
|         |                      | The institution is a university hospital                                                                                           | 7,943   | 1  | ,005 |
|         | Estatísticas globais |                                                                                                                                    | 220,896 | 8  | ,000 |

Testes de Omnibus do Modelo de Coeficientes

|         |        | Qui-quadrado | df | Sig. |
|---------|--------|--------------|----|------|
| Passo 1 | Passo  | 245,760      | 8  | ,000 |
|         | Bloco  | 245,760      | 8  | ,000 |
|         | Modelo | 245,760      | 8  | ,000 |

Resumo do modelo

| Passo | Verossimilhança de log -2 | R quadrado Cox & Snell | R quadrado Nagelkerke |
|-------|---------------------------|------------------------|-----------------------|
| 1     | 1401,849 <sup>a</sup>     | ,172                   | ,240                  |

a. Estimação finalizada no número de iteração 5 porque as estimativas de parâmetro mudaram foram alteradas para menos de ,001.

Teste de Hosmer e Lemeshow

| Passo | Qui-quadrado | df | Sig. |
|-------|--------------|----|------|
| 1     | 5,545        | 8  | ,698 |

Tabela de contingência para teste de Hosmer e Lemeshow

|         |    | PHQ9 Depression Classification - Risk estimate for having current major depressive disorder = Low |          | PHQ9 Depression Classification - Risk estimate for having current major depressive disorder = High |          | Total |
|---------|----|---------------------------------------------------------------------------------------------------|----------|----------------------------------------------------------------------------------------------------|----------|-------|
|         |    | Observado                                                                                         | Esperado | Observado                                                                                          | Esperado |       |
| Passo 1 | 1  | 96                                                                                                | 93,549   | 34                                                                                                 | 36,451   | 130   |
|         | 2  | 69                                                                                                | 72,482   | 61                                                                                                 | 57,518   | 130   |
|         | 3  | 58                                                                                                | 60,017   | 72                                                                                                 | 69,983   | 130   |
|         | 4  | 50                                                                                                | 50,746   | 80                                                                                                 | 79,254   | 130   |
|         | 5  | 39                                                                                                | 42,295   | 91                                                                                                 | 87,705   | 130   |
|         | 6  | 38                                                                                                | 34,778   | 92                                                                                                 | 95,222   | 130   |
|         | 7  | 36                                                                                                | 28,039   | 94                                                                                                 | 101,961  | 130   |
|         | 8  | 20                                                                                                | 22,029   | 110                                                                                                | 107,971  | 130   |
|         | 9  | 16                                                                                                | 15,562   | 114                                                                                                | 114,438  | 130   |
|         | 10 | 5                                                                                                 | 7,503    | 127                                                                                                | 124,497  | 132   |

Tabela de Classificação<sup>a</sup>

|             |           |          |
|-------------|-----------|----------|
| <div></div> | Observado | Previsto |
|-------------|-----------|----------|

|         |                                                                 | PHQ9 Depression Classification - Risk estimate for having current major depressive disorder |      | Porcentagem correta |
|---------|-----------------------------------------------------------------|---------------------------------------------------------------------------------------------|------|---------------------|
|         |                                                                 | Low                                                                                         | High |                     |
| Passo 1 | PHQ9 Depression Classification - Low                            | 169                                                                                         | 258  | 39,6                |
|         | Risk estimate for having current major depressive disorder High | 100                                                                                         | 775  | 88,6                |
|         | Porcentagem global                                              |                                                                                             |      | 72,5                |

a. O valor de recorte é ,500

#### Variáveis na equação

|                      |                                                                                                                                    | B     | S.E. | Wald    | df | Sig. | Exp(B) | 95% C.I. para EXP(B) |          |
|----------------------|------------------------------------------------------------------------------------------------------------------------------------|-------|------|---------|----|------|--------|----------------------|----------|
|                      |                                                                                                                                    |       |      |         |    |      |        | Inferior             | Superior |
| Passo 1 <sup>a</sup> | Sex                                                                                                                                | ,613  | ,157 | 15,256  | 1  | ,000 | 1,846  | 1,357                | 2,512    |
|                      | Any comorbidity (regardless COVID risk)                                                                                            | ,806  | ,192 | 17,647  | 1  | ,000 | 2,238  | 1,537                | 3,259    |
|                      | BRCS Score                                                                                                                         | -,169 | ,019 | 78,619  | 1  | ,000 | ,845   | ,814                 | ,877     |
|                      | Na sua opinião, qual o seu grau de autonomia para decidir condutas no trabalho? (EAV 1-10)                                         | -,043 | ,035 | 1,490   | 1  | ,222 | ,958   | ,895                 | 1,026    |
|                      | Na sua opinião, qual o grau de adequação da organização pedagógica de seu programa de residência profissional? (EAV 1-10)          | -,186 | ,030 | 38,940  | 1  | ,000 | ,830   | ,783                 | ,880     |
|                      | Perceived adequacy of the availability of personal protective equipment, when providing care for patients in the residency program | -,528 | ,175 | 9,065   | 1  | ,003 | ,590   | ,418                 | ,832     |
|                      | Cumulative weekly workload < or >= 60h (dichotomous)                                                                               | ,386  | ,133 | 8,399   | 1  | ,004 | 1,471  | 1,133                | 1,909    |
|                      | The institution is a university hospital                                                                                           | -,679 | ,234 | 8,399   | 1  | ,004 | ,507   | ,320                 | ,803     |
|                      | Constante                                                                                                                          | 4,510 | ,442 | 104,096 | 1  | ,000 | 90,912 |                      |          |

a. Variável(is) inserida(s) no passo 1: Sex, Any comorbidity (regardless COVID risk), BRCS Score, Na sua opinião, qual o seu grau de autonomia para decidir condutas no trabalho? (EAV 1-10), Na sua opinião, qual o grau de adequação da organização pedagógica de seu programa de residência profissional? (EAV 1-10), Perceived adequacy of the availability of personal protective equipment, when providing care for patients in the residency program, Cumulative weekly workload < or >= 60h (dichotomous), The institution is a university hospital.

#### Lista entre casos<sup>a</sup>

a. O plot entre casos não é produzido porque nenhum valor discrepante foi encontrado.

```
LOGISTIC REGRESSION VARIABLES DASS21_Classif_S2c
/METHOD=ENTER Sex ComorbAny BRCS_Score Autonomy PedagStruct PPEAvail_Classif UnivHosp Wkload_9090
/SAVE=COOK ZRESID
/CASEWISE OUTLIER(3)
/PRINT=GOODFIT CI(95)
/CRITERIA=PIN(0.05) POUT(0.10) ITERATE(20) CUT(0.5).
```

Regressão logística

| Observações                      |                                                                                                                                                                                                                                                                                                          |                                                                     |
|----------------------------------|----------------------------------------------------------------------------------------------------------------------------------------------------------------------------------------------------------------------------------------------------------------------------------------------------------|---------------------------------------------------------------------|
| Saída criada                     |                                                                                                                                                                                                                                                                                                          | 20-SEP-2020 18:51:01                                                |
| Comentários                      |                                                                                                                                                                                                                                                                                                          |                                                                     |
| Entrada                          | Dados                                                                                                                                                                                                                                                                                                    | C:\Users\User\Documents\Pesquisa\Fellow\FellowGenData_V1.sav        |
|                                  | Conjunto de dados ativo                                                                                                                                                                                                                                                                                  | ConjuntodeDados1                                                    |
|                                  | Filtro                                                                                                                                                                                                                                                                                                   | <none>                                                              |
|                                  | Ponderação                                                                                                                                                                                                                                                                                               | <none>                                                              |
|                                  | Arquivo Dividido                                                                                                                                                                                                                                                                                         | <none>                                                              |
|                                  | N de linhas em arquivo de dados de trabalho                                                                                                                                                                                                                                                              | 1313                                                                |
|                                  |                                                                                                                                                                                                                                                                                                          |                                                                     |
| Tratamento de valor omissos      | Definição de omissos                                                                                                                                                                                                                                                                                     | Os valores omissos definidos pelo usuário são tratados como omissos |
| Sintaxe                          | LOGISTIC REGRESSION<br>VARIABLES DASS21_Classif_S2c<br>/METHOD=ENTER Sex<br>ComorbAny BRCS_Score<br>Autonomy PedagStruct<br>PPEAvail_Classif UnivHosp<br>Wkload_9090<br>/SAVE=COOK ZRESID<br>/CASEWISE OUTLIER(3)<br>/PRINT=GOODFIT CI(95)<br>/CRITERIA=PIN(0.05)<br>POUT(0.10) ITERATE(20)<br>CUT(0.5). |                                                                     |
| Recursos                         | Tempo do processador                                                                                                                                                                                                                                                                                     | 00:00:00,03                                                         |
|                                  | Tempo decorrido                                                                                                                                                                                                                                                                                          | 00:00:00,04                                                         |
| Variáveis Criadas ou Modificadas | COO_11                                                                                                                                                                                                                                                                                                   | Análogo às estatísticas de influência de Cook                       |
|                                  | ZRE_11                                                                                                                                                                                                                                                                                                   | Resíduo normalizado                                                 |

Resumo de processamento do caso

| Casos não ponderados <sup>a</sup> |                     | N    | Porcentagem |
|-----------------------------------|---------------------|------|-------------|
| Casos selecionados                | Incluído na análise | 1302 | 99,2        |
|                                   | Casos omissos       | 11   | ,8          |
|                                   | Total               | 1313 | 100,0       |
| Casos não selecionados            |                     | 0    | ,0          |
| Total                             |                     | 1313 | 100,0       |

a. Se a ponderação estiver em vigor, veja a tabela de classificação para o número total de casos.

Codificação de variável dependente

| Valor original      | Valor interno |
|---------------------|---------------|
| Normal              | 0             |
| Abnormal (elevated) | 1             |

Bloco 0: Bloco Inicial

Tabela de Classificação<sup>a,b</sup>

|         |                                                 | Previsto                                        |                        |                        |
|---------|-------------------------------------------------|-------------------------------------------------|------------------------|------------------------|
|         |                                                 | DASS21 Classification - Stress<br>(dichotomous) |                        |                        |
|         | Observado                                       | Normal                                          | Abnormal<br>(elevated) | Porcentagem<br>correta |
| Passo 0 | DASS21 Classification - Stress<br>(dichotomous) | Normal                                          | 1004                   | 0                      |
|         |                                                 | Abnormal (elevated)                             | 298                    | 0                      |
|         | Porcentagem global                              |                                                 |                        |                        |
|         |                                                 |                                                 |                        | 100,0                  |
|         |                                                 |                                                 |                        | ,0                     |
|         |                                                 |                                                 |                        | 77,1                   |

- a. A constante está incluída no modelo.  
b. O valor de recorte é ,500

Variáveis na equação

|         |           | B      | S.E. | Wald    | df | Sig. | Exp(B) |
|---------|-----------|--------|------|---------|----|------|--------|
| Passo 0 | Constante | -1,215 | ,066 | 339,035 | 1  | ,000 | ,297   |

Variáveis não presentes na equação

|         |               | Score | df | Sig. |
|---------|---------------|-------|----|------|
| Passo 0 | Variáveis Sex | 7,019 | 1  | ,008 |

|                      |                                                                                                                                    |         |   |      |
|----------------------|------------------------------------------------------------------------------------------------------------------------------------|---------|---|------|
|                      | Any comorbidity (regardless COVID risk)                                                                                            | 4,208   | 1 | ,040 |
|                      | BRCS Score                                                                                                                         | 68,242  | 1 | ,000 |
|                      | Na sua opinião, qual o seu grau de autonomia para decidir condutas no trabalho? (EAV 1-10)                                         | 23,561  | 1 | ,000 |
|                      | Na sua opinião, qual o grau de adequação da organização pedagógica de seu programa de residência profissional? (EAV 1-10)          | 74,615  | 1 | ,000 |
|                      | Perceived adequacy of the availability of personal protective equipment, when providing care for patients in the residency program | 28,860  | 1 | ,000 |
|                      | The institution is a university hospital                                                                                           | 1,104   | 1 | ,293 |
|                      | Cumulative weekly workload < or >= 90h (dichotomous)                                                                               | 7,316   | 1 | ,007 |
| Estatísticas globais |                                                                                                                                    | 146,391 | 8 | ,000 |

Bloco 1: Método = Enter

### Testes de Omnibus do Modelo de Coeficientes

|         |        | Qui-quadrado | df | Sig. |
|---------|--------|--------------|----|------|
| Passo 1 | Passo  | 150,901      | 8  | ,000 |
|         | Bloco  | 150,901      | 8  | ,000 |
|         | Modelo | 150,901      | 8  | ,000 |

### Resumo do modelo

| Passo | Verossimilhança de log -2 | R quadrado Cox & Snell | R quadrado Nagelkerke |
|-------|---------------------------|------------------------|-----------------------|
| 1     | 1249,837 <sup>a</sup>     | ,109                   | ,166                  |

a. Estimação finalizada no número de iteração 5 porque as estimativas de parâmetro mudaram foram alteradas para menos de ,001.

### Teste de Hosmer e Lemeshow

| Passo | Qui-quadrado | df | Sig. |
|-------|--------------|----|------|
| 1     | 4,335        | 8  | ,826 |

**Tabela de contingência para teste de Hosmer e Lemeshow**

|         |    | DASS21 Classification - Stress<br>(dichotomous) = Normal |          | DASS21 Classification - Stress<br>(dichotomous) = Abnormal (elevated) |          | Total |
|---------|----|----------------------------------------------------------|----------|-----------------------------------------------------------------------|----------|-------|
|         |    | Observado                                                | Esperado | Observado                                                             | Esperado |       |
| Passo 1 | 1  | 123                                                      | 122,798  | 7                                                                     | 7,202    | 130   |
|         | 2  | 122                                                      | 118,062  | 8                                                                     | 11,938   | 130   |
|         | 3  | 116                                                      | 114,476  | 14                                                                    | 15,524   | 130   |
|         | 4  | 108                                                      | 110,917  | 22                                                                    | 19,083   | 130   |
|         | 5  | 105                                                      | 106,757  | 25                                                                    | 23,243   | 130   |
|         | 6  | 99                                                       | 102,512  | 31                                                                    | 27,488   | 130   |
|         | 7  | 98                                                       | 97,387   | 32                                                                    | 32,613   | 130   |
|         | 8  | 90                                                       | 90,292   | 40                                                                    | 39,708   | 130   |
|         | 9  | 87                                                       | 81,273   | 43                                                                    | 48,727   | 130   |
|         | 10 | 56                                                       | 59,525   | 76                                                                    | 72,475   | 132   |

**Tabela de Classificação<sup>a</sup>**

|         |                                                 | Previsto<br>DASS21 Classification - Stress<br>(dichotomous) |                        | Porcentagem<br>correta |
|---------|-------------------------------------------------|-------------------------------------------------------------|------------------------|------------------------|
|         |                                                 | Normal                                                      | Abnormal<br>(elevated) |                        |
| Passo 1 | DASS21 Classification - Stress<br>(dichotomous) | Normal                                                      | 968                    | 36                     |
|         |                                                 | Abnormal (elevated)                                         | 251                    | 47                     |
|         | Porcentagem global                              |                                                             |                        | 78,0                   |

a. O valor de recorte é ,500

**Variáveis na equação**

|                      |                                                                                                                                       | B     | S.E. | Wald   | df | Sig. | Exp(B) | 95% C.I. para EXP(B) |          |
|----------------------|---------------------------------------------------------------------------------------------------------------------------------------|-------|------|--------|----|------|--------|----------------------|----------|
|                      |                                                                                                                                       |       |      |        |    |      |        | Inferior             | Superior |
| Passo 1 <sup>a</sup> | Sex                                                                                                                                   | ,606  | ,187 | 10,469 | 1  | ,001 | 1,832  | 1,270                | 2,644    |
|                      | Any comorbidity (regardless<br>COVID risk)                                                                                            | ,245  | ,177 | 1,916  | 1  | ,166 | 1,277  | ,903                 | 1,806    |
|                      | BRCS Score                                                                                                                            | -,124 | ,020 | 37,137 | 1  | ,000 | ,883   | ,849                 | ,919     |
|                      | Na sua opinião, qual o seu grau<br>de autonomia para decidir<br>condutas no trabalho? (EAV 1-10)                                      | -,030 | ,034 | ,776   | 1  | ,378 | ,970   | ,907                 | 1,038    |
|                      | Na sua opinião, qual o grau de<br>adequação da organização<br>pedagógica de seu programa de<br>residência profissional? (EAV<br>1-10) | -,178 | ,030 | 35,007 | 1  | ,000 | ,837   | ,789                 | ,888     |

|                                                                                                                                    |       |      |        |   |      |       |       |       |
|------------------------------------------------------------------------------------------------------------------------------------|-------|------|--------|---|------|-------|-------|-------|
| Perceived adequacy of the availability of personal protective equipment, when providing care for patients in the residency program | -,547 | ,160 | 11,716 | 1 | ,001 | ,578  | ,423  | ,791  |
| The institution is a university hospital                                                                                           | -,268 | ,223 | 1,438  | 1 | ,230 | ,765  | ,494  | 1,185 |
| Cumulative weekly workload < or >= 90h (dichotomous)                                                                               | ,539  | ,258 | 4,362  | 1 | ,037 | 1,714 | 1,034 | 2,841 |
| Constante                                                                                                                          | 1,484 | ,400 | 13,761 | 1 | ,000 | 4,412 |       |       |

a. Variável(is) inserida(s) no passo 1: Sex, Any comorbidity (regardless COVID risk), BRCS Score, Na sua opinião, qual o seu grau de autonomia para decidir condutas no trabalho? (EAV 1-10), Na sua opinião, qual o grau de adequação da organização pedagógica de seu programa de residência profissional? (EAV 1-10), Perceived adequacy of the availability of personal protective equipment, when providing care for patients in the residency program, The institution is a university hospital, Cumulative weekly workload < or >= 90h (dichotomous).

### Lista entre casos<sup>a</sup>

a. O plot entre casos não é produzido porque nenhum valor discrepante foi encontrado.

```
LOGISTIC REGRESSION VARIABLES OLBI_Classif_2c
/METHOD=ENTER ComorbAny BRCS_Score Autonomy PedagStruct PPEAvail_Classif Wkload_9090
/SAVE=COOK ZRESID
/CASEWISE OUTLIER(3)
/PRINT=GOODFIT CI(95)
/CRITERIA=PIN(0.05) POUT(0.10) ITERATE(20) CUT(0.5).
```

Regressão logística

| Observações  |                                             |                                                              |
|--------------|---------------------------------------------|--------------------------------------------------------------|
| Saída criada |                                             | 20-SEP-2020 18:56:22                                         |
| Comentários  |                                             |                                                              |
| Entrada      | Dados                                       | C:\Users\User\Documents\Pesquisa\Fellow\FellowGenData_V1.sav |
|              | Conjunto de dados ativo                     | ConjuntodeDados1                                             |
|              | Filtro                                      | <none>                                                       |
|              | Ponderação                                  | <none>                                                       |
|              | Arquivo Dividido                            | <none>                                                       |
|              | N de linhas em arquivo de dados de trabalho | 1313                                                         |
|              |                                             |                                                              |

|                                  |                      |                                                                                                                                                                                                                                                                                       |
|----------------------------------|----------------------|---------------------------------------------------------------------------------------------------------------------------------------------------------------------------------------------------------------------------------------------------------------------------------------|
| Tratamento de valor omissos      | Definição de omissos | Os valores omissos definidos pelo usuário são tratados como omissos                                                                                                                                                                                                                   |
| Sintaxe                          |                      | LOGISTIC REGRESSION<br>VARIABLES OLBI_Classif_2c<br>/METHOD=ENTER ComorbAny<br>BRCS_Score Autonomy<br>PedagStruct PPEAvail_Classif<br>Wkload_9090<br>/SAVE=COOK ZRESID<br>/CASEWISE OUTLIER(3)<br>/PRINT=GOODFIT CI(95)<br>/CRITERIA=PIN(0.05)<br>POUT(0.10) ITERATE(20)<br>CUT(0.5). |
| Recursos                         | Tempo do processador | 00:00:00,03                                                                                                                                                                                                                                                                           |
|                                  | Tempo decorrido      | 00:00:00,03                                                                                                                                                                                                                                                                           |
| Variáveis Criadas ou Modificadas | COO_12               | Análogo às estatísticas de influência de Cook                                                                                                                                                                                                                                         |
|                                  | ZRE_12               | Resíduo normalizado                                                                                                                                                                                                                                                                   |

### Resumo de processamento do caso

| Casos não ponderados <sup>a</sup> |                     | N    | Porcentagem |
|-----------------------------------|---------------------|------|-------------|
| Casos selecionados                | Incluído na análise | 1305 | 99,4        |
|                                   | Casos omissos       | 8    | ,6          |
|                                   | Total               | 1313 | 100,0       |
| Casos não selecionados            |                     | 0    | ,0          |
| Total                             |                     | 1313 | 100,0       |

a. Se a ponderação estiver em vigor, veja a tabela de classificação para o número total de casos.

### Codificação de variável dependente

| Valor original  | Valor interno |
|-----------------|---------------|
| Low to Moderate | 0             |
| High            | 1             |

Bloco 0: Bloco Inicial

### Tabela de Classificação<sup>a,b</sup>

|             |           |          |
|-------------|-----------|----------|
| <div></div> | Observado | Previsto |
|-------------|-----------|----------|

|         |                           |                 | OLBI Score Classification |      | Porcentagem correta |
|---------|---------------------------|-----------------|---------------------------|------|---------------------|
|         |                           |                 | Low to Moderate           | High |                     |
| Passo 0 | OLBI Score Classification | Low to Moderate | 869                       | 0    | 100,0               |
|         |                           | High            | 436                       | 0    | ,0                  |
|         | Porcentagem global        |                 |                           |      | 66,6                |

a. A constante está incluída no modelo.

b. O valor de recorte é ,500

#### Variáveis na equação

|         |           | B     | S.E. | Wald    | df | Sig. | Exp(B) |
|---------|-----------|-------|------|---------|----|------|--------|
| Passo 0 | Constante | -,690 | ,059 | 138,108 | 1  | ,000 | ,502   |

#### Variáveis não presentes na equação

|         |           |                                                                                                                                    | Escore  | df | Sig. |
|---------|-----------|------------------------------------------------------------------------------------------------------------------------------------|---------|----|------|
| Passo 0 | Variáveis | Any comorbidity (regardless COVID risk)                                                                                            | 16,837  | 1  | ,000 |
|         |           | BRCS Score                                                                                                                         | 142,676 | 1  | ,000 |
|         |           | Na sua opinião, qual o seu grau de autonomia para decidir condutas no trabalho? (EAV 1-10)                                         | 95,392  | 1  | ,000 |
|         |           | Na sua opinião, qual o grau de adequação da organização pedagógica de seu programa de residência profissional? (EAV 1-10)          | 165,405 | 1  | ,000 |
|         |           | Perceived adequacy of the availability of personal protective equipment, when providing care for patients in the residency program | 44,855  | 1  | ,000 |
|         |           | Cumulative weekly workload < or >= 90h (dichotomous)                                                                               | 10,411  | 1  | ,001 |
|         |           | Estatísticas globais                                                                                                               | 297,959 | 6  | ,000 |

Bloco 1: Método = Enter

#### Testes de Omnibus do Modelo de Coeficientes

|         |       | Qui-quadrado | df | Sig. |
|---------|-------|--------------|----|------|
| Passo 1 | Passo | 325,955      | 6  | ,000 |
|         | Bloco | 325,955      | 6  | ,000 |

|        |         |   |      |
|--------|---------|---|------|
| Modelo | 325,955 | 6 | ,000 |
|--------|---------|---|------|

Resumo do modelo

| Passo | Verossimilhança de log -2 | R quadrado Cox & Snell | R quadrado Nagelkerke |
|-------|---------------------------|------------------------|-----------------------|
| 1     | 1336,730 <sup>a</sup>     | ,221                   | ,307                  |

a. Estimação finalizada no número de iteração 5 porque as estimativas de parâmetro mudaram foram alteradas para menos de ,001.

Teste de Hosmer e Lemeshow

| Passo | Qui-quadrado | df | Sig. |
|-------|--------------|----|------|
| 1     | 4,500        | 8  | ,809 |

Tabela de contingência para teste de Hosmer e Lemeshow

|         |    | OLBI Score Classification = Low to Moderate |          | OLBI Score Classification = High |          | Total |
|---------|----|---------------------------------------------|----------|----------------------------------|----------|-------|
|         |    | Observado                                   | Esperado | Observado                        | Esperado |       |
| Passo 1 | 1  | 125                                         | 123,740  | 6                                | 7,260    | 131   |
|         | 2  | 120                                         | 117,571  | 11                               | 13,429   | 131   |
|         | 3  | 110                                         | 111,885  | 21                               | 19,115   | 131   |
|         | 4  | 108                                         | 106,026  | 23                               | 24,974   | 131   |
|         | 5  | 97                                          | 98,924   | 34                               | 32,076   | 131   |
|         | 6  | 83                                          | 89,702   | 48                               | 41,298   | 131   |
|         | 7  | 79                                          | 79,921   | 52                               | 51,079   | 131   |
|         | 8  | 74                                          | 66,956   | 58                               | 65,044   | 132   |
|         | 9  | 48                                          | 49,658   | 83                               | 81,342   | 131   |
|         | 10 | 25                                          | 24,618   | 100                              | 100,382  | 125   |

Tabela de Classificação<sup>a</sup>

|         | Previsto                  |                 |      |             |      |
|---------|---------------------------|-----------------|------|-------------|------|
|         | OLBI Score Classification |                 |      | Porcentagem |      |
|         | Observado                 | Low to Moderate | High | correta     |      |
| Passo 1 | OLBI Score Classification | Low to Moderate | 758  | 111         | 87,2 |
|         |                           | High            | 230  | 206         | 47,2 |
|         | Porcentagem global        |                 |      |             | 73,9 |

a. O valor de recorte é ,500

Variáveis na equação

| B | S.E. | Wald | df | Sig. | Exp(B) | 95% C.I. para EXP(B) |          |
|---|------|------|----|------|--------|----------------------|----------|
|   |      |      |    |      |        | Inferior             | Superior |

|                      |                                                                                                                                    |       |      |         |   |      |        |       |       |
|----------------------|------------------------------------------------------------------------------------------------------------------------------------|-------|------|---------|---|------|--------|-------|-------|
| Passo 1 <sup>a</sup> | Any comorbidity (regardless COVID risk)                                                                                            | ,518  | ,170 | 9,283   | 1 | ,002 | 1,678  | 1,203 | 2,341 |
|                      | BRCS Score                                                                                                                         | -,171 | ,020 | 74,409  | 1 | ,000 | ,843   | ,811  | ,876  |
|                      | Na sua opinião, qual o seu grau de autonomia para decidir condutas no trabalho? (EAV 1-10)                                         | -,137 | ,033 | 16,925  | 1 | ,000 | ,872   | ,817  | ,931  |
|                      | Na sua opinião, qual o grau de adequação da organização pedagógica de seu programa de residência profissional? (EAV 1-10)          | -,252 | ,029 | 74,328  | 1 | ,000 | ,777   | ,734  | ,823  |
|                      | Perceived adequacy of the availability of personal protective equipment, when providing care for patients in the residency program | -,633 | ,158 | 16,101  | 1 | ,000 | ,531   | ,390  | ,723  |
|                      | Cumulative weekly workload < or >= 90h (dichotomous)                                                                               | ,612  | ,259 | 5,570   | 1 | ,018 | 1,844  | 1,109 | 3,066 |
|                      | Constante                                                                                                                          | 3,949 | ,338 | 136,836 | 1 | ,000 | 51,898 |       |       |

a. Variável(is) inserida(s) no passo 1: Any comorbidity (regardless COVID risk), BRCS Score, Na sua opinião, qual o seu grau de autonomia para decidir condutas no trabalho? (EAV 1-10), Na sua opinião, qual o grau de adequação da organização pedagógica de seu programa de residência profissional? (EAV 1-10), Perceived adequacy of the availability of personal protective equipment, when providing care for patients in the residency program, Cumulative weekly workload < or >= 90h (dichotomous).

## Lista entre casos<sup>a</sup>

a. O plot entre casos não é produzido porque nenhum valor discrepante foi encontrado.

\*Nonparametric Tests: Independent Samples.

NPTESTS

/INDEPENDENT TEST (Autonomy PedagStruct) GROUP (UnivHosp) MANN\_WHITEY

/MISSING SCOPE=ANALYSIS USERMISSING=EXCLUDE

/CRITERIA ALPHA=0.05 CILEVEL=95.

Testes não paramétricos

## Observações

Saída criada

20-SEP-2020 23:19:30

Comentários

|          |                                                |                                                                                                                                                                                  |
|----------|------------------------------------------------|----------------------------------------------------------------------------------------------------------------------------------------------------------------------------------|
| Entrada  | Dados                                          | C:\Users\User\Documents\Pesquis<br>a\Fellow\FellowGenData_V1.sav                                                                                                                 |
|          | Conjunto de dados ativo                        | ConjuntodeDados1                                                                                                                                                                 |
|          | Filtro                                         | <none>                                                                                                                                                                           |
|          | Ponderação                                     | <none>                                                                                                                                                                           |
|          | Arquivo Dividido                               | <none>                                                                                                                                                                           |
|          | N de linhas em arquivo de dados<br>de trabalho | 1313                                                                                                                                                                             |
| Sintaxe  |                                                | NPTESTS<br>/INDEPENDENT TEST<br>(Autonomy PedagStruct) GROUP<br>(UnivHosp) MANN_WHITNEY<br>/MISSING SCOPE=ANALYSIS<br>USERMISSING=EXCLUDE<br>/CRITERIA ALPHA=0.05<br>CILEVEL=95. |
| Recursos | Tempo do processador                           | 00:00:00,33                                                                                                                                                                      |
|          | Tempo decorrido                                | 00:00:00,40                                                                                                                                                                      |

null : null

### Resumo de Teste de Hipótese

|   | Hipótese nula                                                                                                                                                                                                          | Teste                                             | Sig. | Decisão                |
|---|------------------------------------------------------------------------------------------------------------------------------------------------------------------------------------------------------------------------|---------------------------------------------------|------|------------------------|
| 1 | A distribuição de Na sua opinião, qual o seu grau de autonomia para decidir condutas no trabalho? (EAV 1-10) é a mesma entre as categorias de The institution is a university hospital.                                | Teste U de Mann-Whitney de amostras independentes | ,845 | Reter a hipótese nula. |
| 2 | A distribuição de Na sua opinião, qual o grau de adequação da organização pedagógica de seu programa de residência profissional? (EAV 1-10) é a mesma entre as categorias de The institution is a university hospital. | Teste U de Mann-Whitney de amostras independentes | ,350 | Reter a hipótese nula. |

São exibidas significâncias assintóticas. O nível de significância é ,05.

## Teste U de Mann-Whitney de amostras independentes

The institution is a university hospital

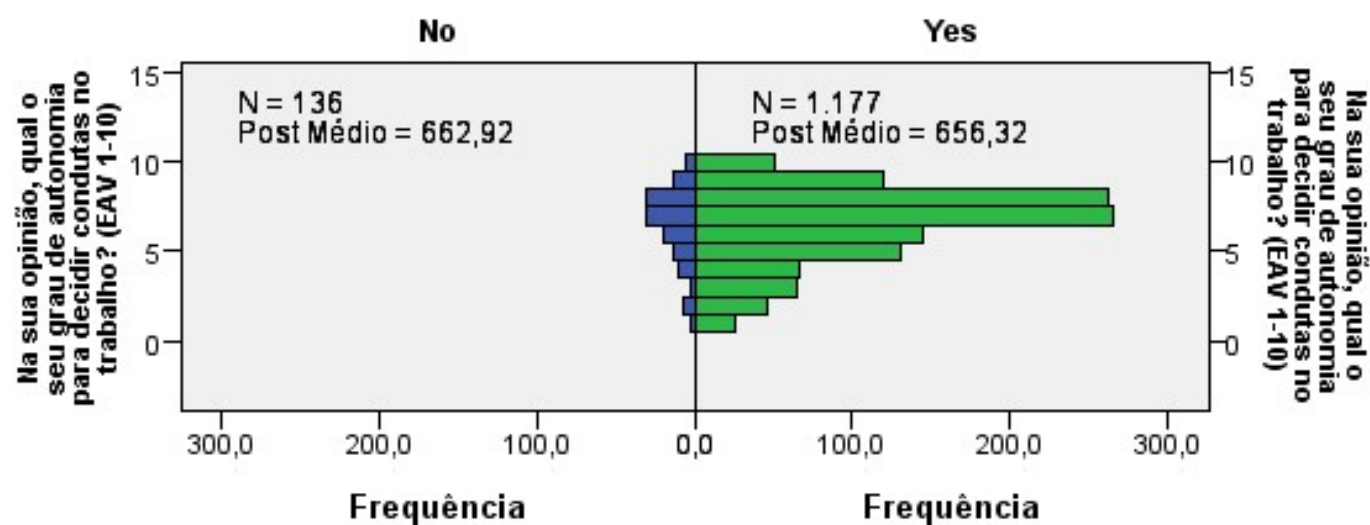

|                                            |             |
|--------------------------------------------|-------------|
| <b>N total</b>                             | 1.313       |
| <b>U de Mann-Whitney</b>                   | 79.230,500  |
| <b>Wilcoxon W</b>                          | 772.483,500 |
| <b>Estatística de teste</b>                | 79.230,500  |
| <b>Erro padrão</b>                         | 4.128,587   |
| <b>Estatística de Teste Padronizado</b>    | -,195       |
| <b>Sig. assintótico (teste de 2 lados)</b> | ,845        |

## Teste U de Mann-Whitney de amostras independentes

The institution is a university hospital

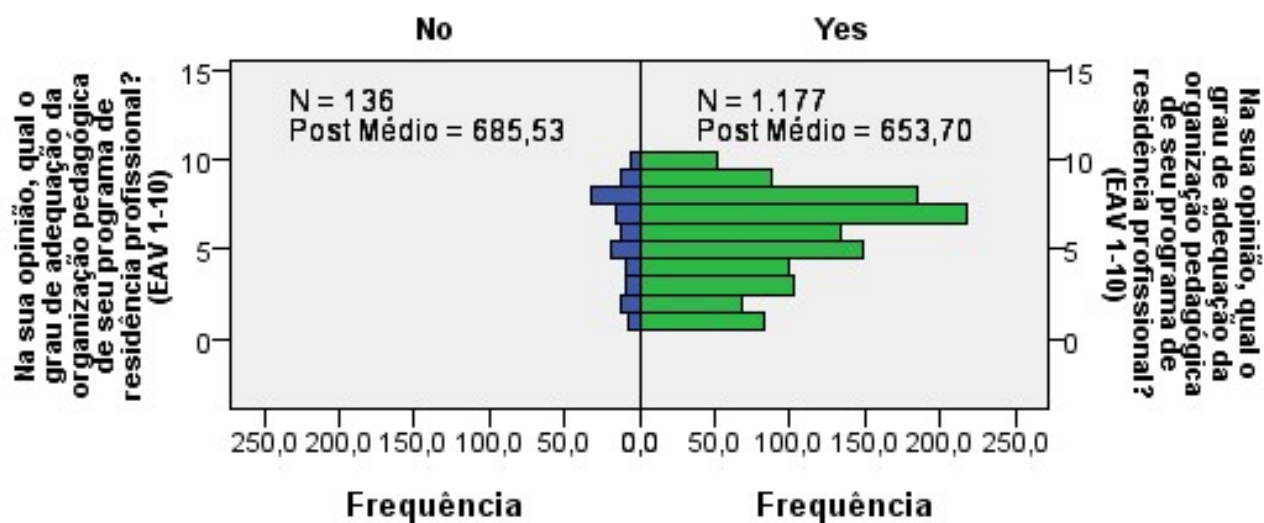

|                                            |             |
|--------------------------------------------|-------------|
| <b>N total</b>                             | 1.313       |
| <b>U de Mann-Whitney</b>                   | 76.156,500  |
| <b>Wilcoxon W</b>                          | 769.409,500 |
| <b>Estatística de teste</b>                | 76.156,500  |
| <b>Erro padrão</b>                         | 4.153,230   |
| <b>Estatística de Teste Padronizado</b>    | -,934       |
| <b>Sig. assintótico (teste de 2 lados)</b> | ,350        |

T-TEST GROUPS=RsPrgType(0 1)  
/MISSING=ANALYSIS  
/VARIABLES=OLBI\_D OLBI\_E  
/CRITERIA=CI(.95).

|                            |                                             |                                                                                                                                    |
|----------------------------|---------------------------------------------|------------------------------------------------------------------------------------------------------------------------------------|
| Saída criada               |                                             | 20-SEP-2020 23:30:21                                                                                                               |
| Comentários                |                                             |                                                                                                                                    |
| Entrada                    | Dados                                       | C:\Users\User\Documents\Pesquisa\Fellow\FellowGenData_V1.sav                                                                       |
|                            | Conjunto de dados ativo                     | ConjuntodeDados1                                                                                                                   |
|                            | Filtro                                      | <none>                                                                                                                             |
|                            | Ponderação                                  | <none>                                                                                                                             |
|                            | Arquivo Dividido                            | <none>                                                                                                                             |
|                            | N de linhas em arquivo de dados de trabalho | 1313                                                                                                                               |
| Tratamento de valor omisso | Definição de omisso                         | Os valores omissos definidos pelo usuário são tratados como omissos.                                                               |
|                            | Casos utilizados                            | As estatísticas para cada análise são baseadas nos casos sem dados omissos ou fora do intervalo para qualquer variável da análise. |
| Sintaxe                    |                                             | T-TEST GROUPS=RsPrgType(0 1) /MISSING=ANALYSIS /VARIABLES=OLBI_D OLBI_E /CRITERIA=CI(.95).                                         |
| Recursos                   | Tempo do processador                        | 00:00:00,02                                                                                                                        |
|                            | Tempo decorrido                             | 00:00:00,02                                                                                                                        |

|                          | Type of residency program | N   | Média  | Erro Desvio | Erro padrão da média |
|--------------------------|---------------------------|-----|--------|-------------|----------------------|
| OLBI Disengagement Score | Non-Medical (Other HCP)   | 639 | 2,7365 | ,81289      | ,03216               |
|                          | Medical                   | 674 | 2,8095 | ,86305      | ,03324               |
| OLBI Exhaustion Score    | Non-Medical (Other HCP)   | 639 | 3,5808 | ,69267      | ,02740               |
|                          | Medical                   | 674 | 3,5298 | ,77501      | ,02985               |

|                          |                                 | Teste de Levene para igualdade de |      | teste-t para Igualdade de Médias |          |               |                 |                               |           |          |
|--------------------------|---------------------------------|-----------------------------------|------|----------------------------------|----------|---------------|-----------------|-------------------------------|-----------|----------|
|                          |                                 | variâncias                        |      |                                  |          |               |                 | 95% Intervalo de Confiança da |           |          |
|                          |                                 |                                   |      |                                  |          | Sig. (2       |                 | Erro padrão de                | Diferença |          |
|                          |                                 | Z                                 | Sig. | t                                | df       | extremidades) | Diferença média | diferença                     | Inferior  | Superior |
| OLBI Disengagement Score | Variâncias iguais assumidas     | 3,509                             | ,061 | -1,576                           | 1311     | ,115          | -,07303         | ,04633                        | -,16391   | ,01785   |
|                          | Variâncias iguais não assumidas |                                   |      | -1,579                           | 1310,945 | ,115          | -,07303         | ,04625                        | -,16377   | ,01771   |

|                       |                                 |       |      |       |          |      |        |        |         |        |
|-----------------------|---------------------------------|-------|------|-------|----------|------|--------|--------|---------|--------|
| OLBI Exhaustion Score | Variâncias iguais assumidas     | 7,257 | ,007 | 1,256 | 1311     | ,209 | ,05105 | ,04064 | -,02868 | ,13078 |
|                       | Variâncias iguais não assumidas |       |      | 1,260 | 1306,487 | ,208 | ,05105 | ,04052 | -,02844 | ,13055 |

DATASET ACTIVATE ConjuntodeDados1.

SAVE OUTFILE='C:\Users\User\Documents\Pesquisa\Fellow\FellowGenData\_V1.sav'  
/COMPRESSED.

CORRELATIONS

/VARIABLES=OLBI\_D OLBI\_E Sex ComorbAny UnivHosp BRCS\_Score Autonomy PedagStruct Wkload\_5P PPEAvail  
/PRINT=TWOTAIL NOSIG  
/MISSING=PAIRWISE.

Correlações

### Observações

|                             |                                             |                                                                                                                                                                           |
|-----------------------------|---------------------------------------------|---------------------------------------------------------------------------------------------------------------------------------------------------------------------------|
| Saída criada                |                                             | 20-SEP-2020 23:36:37                                                                                                                                                      |
| Comentários                 |                                             |                                                                                                                                                                           |
| Entrada                     | Dados                                       | C:\Users\User\Documents\Pesquisa\Fellow\FellowGenData_V1.sav                                                                                                              |
|                             | Conjunto de dados ativo                     | ConjuntodeDados1                                                                                                                                                          |
|                             | Filtro                                      | <none>                                                                                                                                                                    |
|                             | Ponderação                                  | <none>                                                                                                                                                                    |
|                             | Arquivo Dividido                            | <none>                                                                                                                                                                    |
|                             | N de linhas em arquivo de dados de trabalho | 1313                                                                                                                                                                      |
| Tratamento de valor omissos | Definição de omissos                        | Os valores omissos definidos pelo usuário são tratados como omissos.                                                                                                      |
|                             | Casos utilizados                            | As estatísticas para cada par de variáveis são baseadas em todos os casos com dados válidos para aquele par.                                                              |
| Sintaxe                     |                                             | CORRELATIONS<br>/VARIABLES=OLBI_D OLBI_E<br>Sex ComorbAny UnivHosp<br>BRCS_Score Autonomy<br>PedagStruct Wkload_5P PPEAvail<br>/PRINT=TWOTAIL NOSIG<br>/MISSING=PAIRWISE. |
| Recursos                    | Tempo do processador                        | 00:00:00,02                                                                                                                                                               |
|                             | Tempo decorrido                             | 00:00:00,02                                                                                                                                                               |

Correlações

|                                                                                                                                                                                                           |                       | OLBI<br>Disengagement<br>Score | OLBI Exhaustion<br>Score | Sex    | Any comorbidity<br>(regardless COVID<br>risk) | The institution is a<br>university hospital | BRCS Score | Na sua opinião,<br>qual o seu grau de<br>autonomia para<br>decidir condutas no<br>trabalho? (EAV<br>1-10) | Na sua opinião,<br>qual o grau de<br>adequação da<br>organização<br>pedagógica de seu<br>programa de<br>residência<br>profissional? (EAV<br>1-10) | Cumulative weekly<br>workload (five<br>categories) | Na sua prática<br>profissional,<br>especialmente no<br>atendimento a<br>pacientes, por<br>quanto tempo você<br>tem acesso a<br>equipamentos de<br>proteção individual<br>(EPI) suficientes e<br>adequados? (Lickert 1-5) |
|-----------------------------------------------------------------------------------------------------------------------------------------------------------------------------------------------------------|-----------------------|--------------------------------|--------------------------|--------|-----------------------------------------------|---------------------------------------------|------------|-----------------------------------------------------------------------------------------------------------|---------------------------------------------------------------------------------------------------------------------------------------------------|----------------------------------------------------|--------------------------------------------------------------------------------------------------------------------------------------------------------------------------------------------------------------------------|
| OLBI Disengagement Score                                                                                                                                                                                  | Correlação de Pearson | 1                              | ,576"                    | -.045  | ,110"                                         | -.026                                       | -.406"     | -.329"                                                                                                    | -.439"                                                                                                                                            | ,053                                               | -.224"                                                                                                                                                                                                                   |
|                                                                                                                                                                                                           | Sig. (2 extremidades) |                                | ,000                     | ,105   | ,000                                          | ,353                                        | ,000       | ,000                                                                                                      | ,000                                                                                                                                              | ,053                                               | ,000                                                                                                                                                                                                                     |
|                                                                                                                                                                                                           | N                     | 1313                           | 1313                     | 1310   | 1305                                          | 1313                                        | 1313       | 1313                                                                                                      | 1313                                                                                                                                              | 1313                                               | 1313                                                                                                                                                                                                                     |
| OLBI Exhaustion Score                                                                                                                                                                                     | Correlação de Pearson | ,576"                          | 1                        | ,146"  | ,109"                                         | -.014                                       | -.366"     | -.262"                                                                                                    | -.347"                                                                                                                                            | ,122"                                              | -.193"                                                                                                                                                                                                                   |
|                                                                                                                                                                                                           | Sig. (2 extremidades) | ,000                           |                          | ,000   | ,000                                          | ,622                                        | ,000       | ,000                                                                                                      | ,000                                                                                                                                              | ,000                                               | ,000                                                                                                                                                                                                                     |
|                                                                                                                                                                                                           | N                     | 1313                           | 1313                     | 1310   | 1305                                          | 1313                                        | 1313       | 1313                                                                                                      | 1313                                                                                                                                              | 1313                                               | 1313                                                                                                                                                                                                                     |
| Sex                                                                                                                                                                                                       | Correlação de Pearson | -.045                          | ,146"                    | 1      | -.033                                         | ,003                                        | -.011      | ,068'                                                                                                     | ,012                                                                                                                                              | -.102"                                             | ,039                                                                                                                                                                                                                     |
|                                                                                                                                                                                                           | Sig. (2 extremidades) | ,105                           | ,000                     |        | ,236                                          | ,928                                        | ,678       | ,014                                                                                                      | ,664                                                                                                                                              | ,000                                               | ,154                                                                                                                                                                                                                     |
|                                                                                                                                                                                                           | N                     | 1310                           | 1310                     | 1310   | 1302                                          | 1310                                        | 1310       | 1310                                                                                                      | 1310                                                                                                                                              | 1310                                               | 1310                                                                                                                                                                                                                     |
| Any comorbidity (regardless COVID<br>risk)                                                                                                                                                                | Correlação de Pearson | ,110"                          | ,109"                    | -.033  | 1                                             | -.063'                                      | -.036      | -.070'                                                                                                    | -.052                                                                                                                                             | ,046                                               | -.052                                                                                                                                                                                                                    |
|                                                                                                                                                                                                           | Sig. (2 extremidades) | ,000                           | ,000                     | ,236   |                                               | ,023                                        | ,200       | ,011                                                                                                      | ,062                                                                                                                                              | ,097                                               | ,061                                                                                                                                                                                                                     |
|                                                                                                                                                                                                           | N                     | 1305                           | 1305                     | 1302   | 1305                                          | 1305                                        | 1305       | 1305                                                                                                      | 1305                                                                                                                                              | 1305                                               | 1305                                                                                                                                                                                                                     |
| The institution is a university<br>hospital                                                                                                                                                               | Correlação de Pearson | -.026                          | -.014                    | ,003   | -.063'                                        | 1                                           | -.001      | -.010                                                                                                     | -.020                                                                                                                                             | -.051                                              | ,036                                                                                                                                                                                                                     |
|                                                                                                                                                                                                           | Sig. (2 extremidades) | ,353                           | ,622                     | ,928   | ,023                                          |                                             | ,966       | ,724                                                                                                      | ,469                                                                                                                                              | ,067                                               | ,188                                                                                                                                                                                                                     |
|                                                                                                                                                                                                           | N                     | 1313                           | 1313                     | 1310   | 1305                                          | 1313                                        | 1313       | 1313                                                                                                      | 1313                                                                                                                                              | 1313                                               | 1313                                                                                                                                                                                                                     |
| BRCS Score                                                                                                                                                                                                | Correlação de Pearson | -.406"                         | -.366"                   | -.011  | -.036                                         | -.001                                       | 1          | ,244"                                                                                                     | ,227"                                                                                                                                             | ,023                                               | ,120"                                                                                                                                                                                                                    |
|                                                                                                                                                                                                           | Sig. (2 extremidades) | ,000                           | ,000                     | ,678   | ,200                                          | ,966                                        |            | ,000                                                                                                      | ,000                                                                                                                                              | ,401                                               | ,000                                                                                                                                                                                                                     |
|                                                                                                                                                                                                           | N                     | 1313                           | 1313                     | 1310   | 1305                                          | 1313                                        | 1313       | 1313                                                                                                      | 1313                                                                                                                                              | 1313                                               | 1313                                                                                                                                                                                                                     |
| Na sua opinião, qual o seu grau de<br>autonomia para decidir condutas no<br>trabalho? (EAV 1-10)                                                                                                          | Correlação de Pearson | -.329"                         | -.262"                   | ,068'  | -.070'                                        | -.010                                       | ,244"      | 1                                                                                                         | ,320"                                                                                                                                             | -.021                                              | ,132"                                                                                                                                                                                                                    |
|                                                                                                                                                                                                           | Sig. (2 extremidades) | ,000                           | ,000                     | ,014   | ,011                                          | ,724                                        | ,000       |                                                                                                           | ,000                                                                                                                                              | ,449                                               | ,000                                                                                                                                                                                                                     |
|                                                                                                                                                                                                           | N                     | 1313                           | 1313                     | 1310   | 1305                                          | 1313                                        | 1313       | 1313                                                                                                      | 1313                                                                                                                                              | 1313                                               | 1313                                                                                                                                                                                                                     |
| Na sua opinião, qual o grau de<br>adequação da organização<br>pedagógica de seu programa de<br>residência profissional? (EAV 1-10)                                                                        | Correlação de Pearson | -.439"                         | -.347"                   | ,012   | -.052                                         | -.020                                       | ,227"      | ,320"                                                                                                     | 1                                                                                                                                                 | -.004                                              | ,170"                                                                                                                                                                                                                    |
|                                                                                                                                                                                                           | Sig. (2 extremidades) | ,000                           | ,000                     | ,664   | ,062                                          | ,469                                        | ,000       | ,000                                                                                                      |                                                                                                                                                   | ,882                                               | ,000                                                                                                                                                                                                                     |
|                                                                                                                                                                                                           | N                     | 1313                           | 1313                     | 1310   | 1305                                          | 1313                                        | 1313       | 1313                                                                                                      | 1313                                                                                                                                              | 1313                                               | 1313                                                                                                                                                                                                                     |
| Cumulative weekly workload (five<br>categories)                                                                                                                                                           | Correlação de Pearson | ,053                           | ,122"                    | -.102" | ,046                                          | -.051                                       | ,023       | -.021                                                                                                     | -.004                                                                                                                                             | 1                                                  | -.110"                                                                                                                                                                                                                   |
|                                                                                                                                                                                                           | Sig. (2 extremidades) | ,053                           | ,000                     | ,000   | ,097                                          | ,067                                        | ,401       | ,449                                                                                                      | ,882                                                                                                                                              |                                                    | ,000                                                                                                                                                                                                                     |
|                                                                                                                                                                                                           | N                     | 1313                           | 1313                     | 1310   | 1305                                          | 1313                                        | 1313       | 1313                                                                                                      | 1313                                                                                                                                              | 1313                                               | 1313                                                                                                                                                                                                                     |
| Na sua prática profissional,<br>especialmente no atendimento a<br>pacientes, por quanto tempo você<br>tem acesso a equipamentos de<br>proteção individual (EPI) suficientes<br>e adequados? (Lickert 1-5) | Correlação de Pearson | -.224"                         | -.193"                   | ,039   | -.052                                         | ,036                                        | ,120"      | ,132"                                                                                                     | ,170"                                                                                                                                             | -.110"                                             | 1                                                                                                                                                                                                                        |
|                                                                                                                                                                                                           | Sig. (2 extremidades) | ,000                           | ,000                     | ,154   | ,061                                          | ,188                                        | ,000       | ,000                                                                                                      | ,000                                                                                                                                              | ,000                                               |                                                                                                                                                                                                                          |
|                                                                                                                                                                                                           | N                     | 1313                           | 1313                     | 1310   | 1305                                          | 1313                                        | 1313       | 1313                                                                                                      | 1313                                                                                                                                              | 1313                                               | 1313                                                                                                                                                                                                                     |

\*\* A correlação é significativa no nível 0,01 (2 extremidades).

\* A correlação é significativa no nível 0,05 (2 extremidades).

```
NONPAR CORR
/VARIABLES=OLBI_D OLBI_E Sex ComorbAny UnivHosp BRCS_Score Autonomy PedagStruct Wkload_5P PPEAvail
/PRINT=SPEARMAN TWOTAIL NOSIG
/MISSING=PAIRWISE.
```

Correlações não paramétricas

| Observações                 |                                             |                                                                                                                                                                          |
|-----------------------------|---------------------------------------------|--------------------------------------------------------------------------------------------------------------------------------------------------------------------------|
| Saída criada                |                                             | 20-SEP-2020 23:36:37                                                                                                                                                     |
| Comentários                 |                                             |                                                                                                                                                                          |
| Entrada                     | Dados                                       | C:\Users\User\Documents\Pesquisa\Fellow\FellowGenData_V1.sav                                                                                                             |
|                             | Conjunto de dados ativo                     | ConjuntodeDados1                                                                                                                                                         |
|                             | Filtro                                      | <none>                                                                                                                                                                   |
|                             | Ponderação                                  | <none>                                                                                                                                                                   |
|                             | Arquivo Dividido                            | <none>                                                                                                                                                                   |
|                             | N de linhas em arquivo de dados de trabalho | 1313                                                                                                                                                                     |
| Tratamento de valor omissos | Definição de omissos                        | Os valores omissos definidos pelo usuário são tratados como omissos.                                                                                                     |
|                             | Casos utilizados                            | As estatísticas para cada par de variáveis são baseadas em todos os casos com dados válidos para aquele par.                                                             |
| Sintaxe                     |                                             | NONPAR CORR<br>/VARIABLES=OLBI_D OLBI_E Sex ComorbAny UnivHosp BRCS_Score Autonomy PedagStruct Wkload_5P PPEAvail<br>/PRINT=SPEARMAN TWOTAIL NOSIG<br>/MISSING=PAIRWISE. |
| Recursos                    | Tempo do processador                        | 00:00:00,02                                                                                                                                                              |
|                             | Tempo decorrido                             | 00:00:00,02                                                                                                                                                              |
|                             | Número de Casos Permitidos                  | 241979 casos <sup>a</sup>                                                                                                                                                |

a. Baseado na disponibilidade de memória da área de trabalho

|                |                                                                                                                           |                            | OLBI Disengagement Score | OLBI Exhaustion Score | Sex    | Any comorbidity (regardless COVID risk) | The institution is a university hospital | BRCS Score | Na sua opinião, qual o seu grau de autonomia para decidir condutas no trabalho? (EAV 1-10) | Na sua opinião, qual o grau de adequação da organização pedagógica de seu programa de residência profissional? (EAV 1-10) | Cumulative weekly workload (five categories) | Na sua prática profissional, especialmente no atendimento a pacientes, por quanto tempo você tem acesso a equipamentos de proteção individual (EPI) suficientes e adequados? (Lickert 1-5) |
|----------------|---------------------------------------------------------------------------------------------------------------------------|----------------------------|--------------------------|-----------------------|--------|-----------------------------------------|------------------------------------------|------------|--------------------------------------------------------------------------------------------|---------------------------------------------------------------------------------------------------------------------------|----------------------------------------------|--------------------------------------------------------------------------------------------------------------------------------------------------------------------------------------------|
| rô de Spearman | OLBI Disengagement Score                                                                                                  | Coefficiente de Correlação | 1,000                    | ,572"                 | -,039  | ,104"                                   | -,021                                    | -,394"     | -,299"                                                                                     | -,437"                                                                                                                    | ,054'                                        | -,212"                                                                                                                                                                                     |
|                |                                                                                                                           | Sig. (2 extremidades)      | .                        | ,000                  | ,154   | ,000                                    | ,438                                     | ,000       | ,000                                                                                       | ,000                                                                                                                      | ,050                                         | ,000                                                                                                                                                                                       |
|                |                                                                                                                           | N                          | 1313                     | 1313                  | 1310   | 1305                                    | 1313                                     | 1313       | 1313                                                                                       | 1313                                                                                                                      | 1313                                         | 1313                                                                                                                                                                                       |
|                | OLBI Exhaustion Score                                                                                                     | Coefficiente de Correlação | ,572"                    | 1,000                 | ,127"  | ,114"                                   | -,025                                    | -,352"     | -,257"                                                                                     | -,345"                                                                                                                    | ,125"                                        | -,180"                                                                                                                                                                                     |
|                |                                                                                                                           | Sig. (2 extremidades)      | ,000                     | .                     | ,000   | ,000                                    | ,364                                     | ,000       | ,000                                                                                       | ,000                                                                                                                      | ,000                                         | ,000                                                                                                                                                                                       |
|                |                                                                                                                           | N                          | 1313                     | 1313                  | 1310   | 1305                                    | 1313                                     | 1313       | 1313                                                                                       | 1313                                                                                                                      | 1313                                         | 1313                                                                                                                                                                                       |
|                | Sex                                                                                                                       | Coefficiente de Correlação | -,039                    | ,127"                 | 1,000  | -,033                                   | ,003                                     | -,012      | ,060'                                                                                      | ,009                                                                                                                      | -,089"                                       | ,041                                                                                                                                                                                       |
|                |                                                                                                                           | Sig. (2 extremidades)      | ,154                     | ,000                  | .      | ,236                                    | ,928                                     | ,658       | ,029                                                                                       | ,733                                                                                                                      | ,001                                         | ,142                                                                                                                                                                                       |
|                |                                                                                                                           | N                          | 1310                     | 1310                  | 1310   | 1302                                    | 1310                                     | 1310       | 1310                                                                                       | 1310                                                                                                                      | 1310                                         | 1310                                                                                                                                                                                       |
|                | Any comorbidity (regardless COVID risk)                                                                                   | Coefficiente de Correlação | ,104"                    | ,114"                 | -,033  | 1,000                                   | -,063'                                   | -,038      | -,061'                                                                                     | -,051                                                                                                                     | ,038                                         | -,034                                                                                                                                                                                      |
|                |                                                                                                                           | Sig. (2 extremidades)      | ,000                     | ,000                  | ,236   | .                                       | ,023                                     | ,174       | ,028                                                                                       | ,068                                                                                                                      | ,167                                         | ,220                                                                                                                                                                                       |
|                |                                                                                                                           | N                          | 1305                     | 1305                  | 1302   | 1305                                    | 1305                                     | 1305       | 1305                                                                                       | 1305                                                                                                                      | 1305                                         | 1305                                                                                                                                                                                       |
|                | The institution is a university hospital                                                                                  | Coefficiente de Correlação | -,021                    | -,025                 | ,003   | -,063'                                  | 1,000                                    | -,004      | -,005                                                                                      | -,026                                                                                                                     | -,061'                                       | ,028                                                                                                                                                                                       |
|                |                                                                                                                           | Sig. (2 extremidades)      | ,438                     | ,364                  | ,928   | ,023                                    | .                                        | ,876       | ,845                                                                                       | ,350                                                                                                                      | ,027                                         | ,306                                                                                                                                                                                       |
|                |                                                                                                                           | N                          | 1313                     | 1313                  | 1310   | 1305                                    | 1313                                     | 1313       | 1313                                                                                       | 1313                                                                                                                      | 1313                                         | 1313                                                                                                                                                                                       |
|                | BRCS Score                                                                                                                | Coefficiente de Correlação | -,394"                   | -,352"                | -,012  | -,038                                   | -,004                                    | 1,000      | ,239"                                                                                      | ,218"                                                                                                                     | ,027                                         | ,112"                                                                                                                                                                                      |
|                |                                                                                                                           | Sig. (2 extremidades)      | ,000                     | ,000                  | ,658   | ,174                                    | ,876                                     | .          | ,000                                                                                       | ,000                                                                                                                      | ,335                                         | ,000                                                                                                                                                                                       |
|                |                                                                                                                           | N                          | 1313                     | 1313                  | 1310   | 1305                                    | 1313                                     | 1313       | 1313                                                                                       | 1313                                                                                                                      | 1313                                         | 1313                                                                                                                                                                                       |
|                | Na sua opinião, qual o seu grau de autonomia para decidir condutas no trabalho? (EAV 1-10)                                | Coefficiente de Correlação | -,299"                   | -,257"                | ,060'  | -,061'                                  | -,005                                    | ,239"      | 1,000                                                                                      | ,303"                                                                                                                     | -,029                                        | ,129"                                                                                                                                                                                      |
|                |                                                                                                                           | Sig. (2 extremidades)      | ,000                     | ,000                  | ,029   | ,028                                    | ,845                                     | ,000       | .                                                                                          | ,000                                                                                                                      | ,292                                         | ,000                                                                                                                                                                                       |
|                |                                                                                                                           | N                          | 1313                     | 1313                  | 1310   | 1305                                    | 1313                                     | 1313       | 1313                                                                                       | 1313                                                                                                                      | 1313                                         | 1313                                                                                                                                                                                       |
|                | Na sua opinião, qual o grau de adequação da organização pedagógica de seu programa de residência profissional? (EAV 1-10) | Coefficiente de Correlação | -,437"                   | -,345"                | ,009   | -,051                                   | -,026                                    | ,218"      | ,303"                                                                                      | 1,000                                                                                                                     | -,003                                        | ,165"                                                                                                                                                                                      |
|                |                                                                                                                           | Sig. (2 extremidades)      | ,000                     | ,000                  | ,733   | ,068                                    | ,350                                     | ,000       | ,000                                                                                       | .                                                                                                                         | ,915                                         | ,000                                                                                                                                                                                       |
|                |                                                                                                                           | N                          | 1313                     | 1313                  | 1310   | 1305                                    | 1313                                     | 1313       | 1313                                                                                       | 1313                                                                                                                      | 1313                                         | 1313                                                                                                                                                                                       |
|                | Cumulative weekly workload (five categories)                                                                              | Coefficiente de Correlação | ,054'                    | ,125"                 | -,089" | ,038                                    | -,061'                                   | ,027       | -,029                                                                                      | -,003                                                                                                                     | 1,000                                        | -,111"                                                                                                                                                                                     |
|                |                                                                                                                           | Sig. (2 extremidades)      | ,050                     | ,000                  | ,001   | ,167                                    | ,027                                     | ,335       | ,292                                                                                       | ,915                                                                                                                      | .                                            | ,000                                                                                                                                                                                       |
|                |                                                                                                                           | N                          | 1313                     | 1313                  | 1310   | 1305                                    | 1313                                     | 1313       | 1313                                                                                       | 1313                                                                                                                      | 1313                                         | 1313                                                                                                                                                                                       |
|                | Na sua prática profissional, especialmente no atendimento a                                                               | Coefficiente de Correlação | -,212"                   | -,180"                | ,041   | -,034                                   | ,028                                     | ,112"      | ,129"                                                                                      | ,165"                                                                                                                     | -,111"                                       | 1,000                                                                                                                                                                                      |
|                |                                                                                                                           | Sig. (2 extremidades)      | ,000                     | ,000                  | ,142   | ,220                                    | ,306                                     | ,000       | ,000                                                                                       | ,000                                                                                                                      | ,000                                         | .                                                                                                                                                                                          |

|                                |   |      |      |      |      |      |      |      |      |      |      |
|--------------------------------|---|------|------|------|------|------|------|------|------|------|------|
| pacientes, por quanto tempo    | N | 1313 | 1313 | 1310 | 1305 | 1313 | 1313 | 1313 | 1313 | 1313 | 1313 |
| você tem acesso a              |   |      |      |      |      |      |      |      |      |      |      |
| equipamentos de proteção       |   |      |      |      |      |      |      |      |      |      |      |
| individual (EPI) suficientes e |   |      |      |      |      |      |      |      |      |      |      |
| adequados? (Lickert 1-5)       |   |      |      |      |      |      |      |      |      |      |      |

\*\*.

A correlação é significativa no nível 0,01 (2 extremidades).

\*.

A correlação é significativa no nível 0,05 (2 extremidades).

```

EXAMINE VARIABLES=OLBI_D OLBI_E BY Sex ComorbAny BRCS_Classif Autonomy_Classif PedagStr_Classif
PPEAvail_Classif Wkload_6060
/PLOT HISTOGRAM NPPLÖT
/PERCENTILES(5,10,25,50,75,90,95) HAVERAGE
/STATISTICS DESCRIPTIVES
/CINTERVAL 95
/MISSING PAIRWISE
/NOTOTAL.

```

Explorar

| Observações                |                                             |                                                                                                                             |
|----------------------------|---------------------------------------------|-----------------------------------------------------------------------------------------------------------------------------|
| Saída criada               |                                             | 21-SEP-2020 00:05:12                                                                                                        |
| Comentários                |                                             |                                                                                                                             |
| Entrada                    | Dados                                       | C:\Users\User\Documents\Pesquisa\Fellow\FellowGenData_V1.sav                                                                |
|                            | Conjunto de dados ativo                     | ConjuntodeDados1                                                                                                            |
|                            | Filtro                                      | <none>                                                                                                                      |
|                            | Ponderação                                  | <none>                                                                                                                      |
|                            | Arquivo Dividido                            | <none>                                                                                                                      |
|                            | N de linhas em arquivo de dados de trabalho | 1313                                                                                                                        |
|                            |                                             |                                                                                                                             |
| Tratamento de valor omisso | Definição de omisso                         | Os valores omissos definidos pelo usuário para variáveis dependentes são tratados como omissos.                             |
|                            | Casos utilizados                            | As estatísticas são baseadas em casos sem valores omissos para a variável dependente ou fatores que estão sendo analisados. |

|          |                      |                                                                                                                                                                                                                                                                                                           |
|----------|----------------------|-----------------------------------------------------------------------------------------------------------------------------------------------------------------------------------------------------------------------------------------------------------------------------------------------------------|
| Sintaxe  |                      | EXAMINE VARIABLES=OLBI_D<br>OLBI_E BY Sex ComorbAny<br>BRCS_Classif Autonomy_Classif<br>PedagStr_Classif<br>PPEAvail_Classif<br>Wkload_6060<br>/PLOT HISTOGRAM NPLOT<br><br>/PERCENTILES(5,10,25,50,75,90,<br>95) HAVERAGE<br>/STATISTICS DESCRIPTIVES<br>/CINTERVAL 95<br>/MISSING PAIRWISE<br>/NOTOTAL. |
| Recursos | Tempo do processador | 00:00:11,86                                                                                                                                                                                                                                                                                               |
|          | Tempo decorrido      | 00:00:11,57                                                                                                                                                                                                                                                                                               |

Sex

| Resumo de processamento do caso |        |        |             |              |             |       |             |
|---------------------------------|--------|--------|-------------|--------------|-------------|-------|-------------|
|                                 |        | Válido |             | Casos Omisso |             | Total |             |
|                                 | Sex    | N      | Porcentagem | N            | Porcentagem | N     | Porcentagem |
| OLBI Disengagement Score        | Male   | 285    | 100,0%      | 0            | 0,0%        | 285   | 100,0%      |
|                                 | Female | 1025   | 100,0%      | 0            | 0,0%        | 1025  | 100,0%      |
| OLBI Exhaustion Score           | Male   | 285    | 100,0%      | 0            | 0,0%        | 285   | 100,0%      |
|                                 | Female | 1025   | 100,0%      | 0            | 0,0%        | 1025  | 100,0%      |

| Descritivos              |      |                                                 |        |           |
|--------------------------|------|-------------------------------------------------|--------|-----------|
|                          | Sex  | Estatística                                     |        | Erro Erro |
| OLBI Disengagement Score | Male | Média                                           | 2,8443 | ,05217    |
|                          |      | 95% Intervalo de Confiança para Limite inferior | 2,7416 |           |
|                          |      | Média Limite superior                           | 2,9470 |           |
|                          |      | 5% da média aparada                             | 2,8349 |           |
|                          |      | Mediana                                         | 2,8750 |           |
|                          |      | Variância                                       | ,776   |           |
|                          |      | Erro Desvio                                     | ,88079 |           |
|                          |      | Mínimo                                          | 1,00   |           |
|                          |      | Máximo                                          | 5,00   |           |
|                          |      | Intervalo                                       | 4,00   |           |
|                          |      | Amplitude interquartil                          | 1,25   |           |
|                          |      | Assimetria                                      | ,166   | ,144      |

|                                 |                 |                                 |                 |                 |        |        |        |
|---------------------------------|-----------------|---------------------------------|-----------------|-----------------|--------|--------|--------|
|                                 | Female          | Curtose                         |                 | -,556           | ,288   |        |        |
|                                 |                 | Média                           |                 | 2,7533          | ,02582 |        |        |
|                                 |                 | 95% Intervalo de Confiança para | Limite inferior | 2,7026          |        |        |        |
|                                 |                 | Média                           | Limite superior | 2,8040          |        |        |        |
|                                 |                 | 5% da média aparada             |                 | 2,7417          |        |        |        |
|                                 |                 | Mediana                         |                 | 2,7500          |        |        |        |
|                                 |                 | Variância                       |                 | ,683            |        |        |        |
|                                 |                 | Erro Desvio                     |                 | ,82663          |        |        |        |
|                                 |                 | Mínimo                          |                 | 1,00            |        |        |        |
|                                 |                 | Máximo                          |                 | 5,00            |        |        |        |
|                                 |                 | Intervalo                       |                 | 4,00            |        |        |        |
|                                 |                 | Amplitude interquartil          |                 | 1,25            |        |        |        |
|                                 |                 | Assimetria                      |                 | ,184            | ,076   |        |        |
|                                 |                 | Curtose                         |                 | -,390           | ,153   |        |        |
|                                 |                 | OLBI Exhaustion Score           | Male            | Média           |        | 3,3500 | ,04911 |
|                                 |                 | 95% Intervalo de Confiança para |                 | Limite inferior | 3,2533 |        |        |
| Média                           | Limite superior | 3,4466                          |                 |                 |        |        |        |
| 5% da média aparada             |                 | 3,3748                          |                 |                 |        |        |        |
| Mediana                         |                 | 3,3800                          |                 |                 |        |        |        |
| Variância                       |                 | ,687                            |                 |                 |        |        |        |
| Erro Desvio                     |                 | ,82909                          |                 |                 |        |        |        |
| Mínimo                          |                 | 1,00                            |                 |                 |        |        |        |
| Máximo                          |                 | 5,00                            |                 |                 |        |        |        |
| Intervalo                       |                 | 4,00                            |                 |                 |        |        |        |
| Amplitude interquartil          |                 | 1,20                            |                 |                 |        |        |        |
| Assimetria                      |                 | -,447                           |                 | ,144            |        |        |        |
| Curtose                         |                 | -,113                           |                 | ,288            |        |        |        |
|                                 | Female          | Média                           |                 |                 | 3,6104 | ,02181 |        |
| 95% Intervalo de Confiança para |                 | Limite inferior                 |                 | 3,5676          |        |        |        |
| Média                           |                 | Limite superior                 |                 | 3,6532          |        |        |        |
| 5% da média aparada             |                 |                                 | 3,6306          |                 |        |        |        |
| Mediana                         |                 |                                 | 3,6300          |                 |        |        |        |
| Variância                       |                 |                                 | ,488            |                 |        |        |        |
| Erro Desvio                     |                 |                                 | ,69830          |                 |        |        |        |
| Mínimo                          |                 |                                 | 1,00            |                 |        |        |        |
| Máximo                          |                 |                                 | 5,00            |                 |        |        |        |
| Intervalo                       |                 |                                 | 4,00            |                 |        |        |        |
| Amplitude interquartil          |                 |                                 | ,99             |                 |        |        |        |
| Assimetria                      |                 |                                 | -,476           | ,076            |        |        |        |
| Curtose                         |                 |                                 | ,186            | ,153            |        |        |        |

Sex

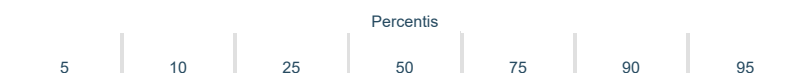

|                               |                          |        |        |        |        |        |        |        |        |
|-------------------------------|--------------------------|--------|--------|--------|--------|--------|--------|--------|--------|
| Média Ponderada (Definição 1) | OLBI Disengagement Score | Male   | 1,5000 | 1,6250 | 2,2500 | 2,8750 | 3,5000 | 4,0500 | 4,3750 |
|                               |                          | Female | 1,3750 | 1,6250 | 2,1250 | 2,7500 | 3,3750 | 3,8750 | 4,2500 |
|                               | OLBI Exhaustion Score    | Male   | 1,8800 | 2,2020 | 2,8050 | 3,3800 | 4,0000 | 4,2900 | 4,6300 |
|                               |                          | Female | 2,2900 | 2,6300 | 3,1400 | 3,6300 | 4,1300 | 4,5000 | 4,7100 |
| Teste de Tukey                | OLBI Disengagement Score | Male   |        |        | 2,2500 | 2,8750 | 3,5000 |        |        |
|                               |                          | Female |        |        | 2,1250 | 2,7500 | 3,3750 |        |        |
|                               | OLBI Exhaustion Score    | Male   |        |        | 2,8600 | 3,3800 | 4,0000 |        |        |
|                               |                          | Female |        |        | 3,1400 | 3,6300 | 4,1300 |        |        |

| Testes de Normalidade    |        |                                 |      |      |              |      |      |
|--------------------------|--------|---------------------------------|------|------|--------------|------|------|
|                          |        | Kolmogorov-Smirnov <sup>a</sup> |      |      | Shapiro-Wilk |      |      |
|                          | Sex    | Estatística                     | df   | Sig. | Estatística  | df   | Sig. |
| OLBI Disengagement Score | Male   | ,063                            | 285  | ,009 | ,988         | 285  | ,014 |
|                          | Female | ,054                            | 1025 | ,000 | ,991         | 1025 | ,000 |
| OLBI Exhaustion Score    | Male   | ,066                            | 285  | ,004 | ,980         | 285  | ,001 |
|                          | Female | ,065                            | 1025 | ,000 | ,982         | 1025 | ,000 |

a. Correlação de Significância de Lilliefors

OLBI Disengagement Score

Histogramas

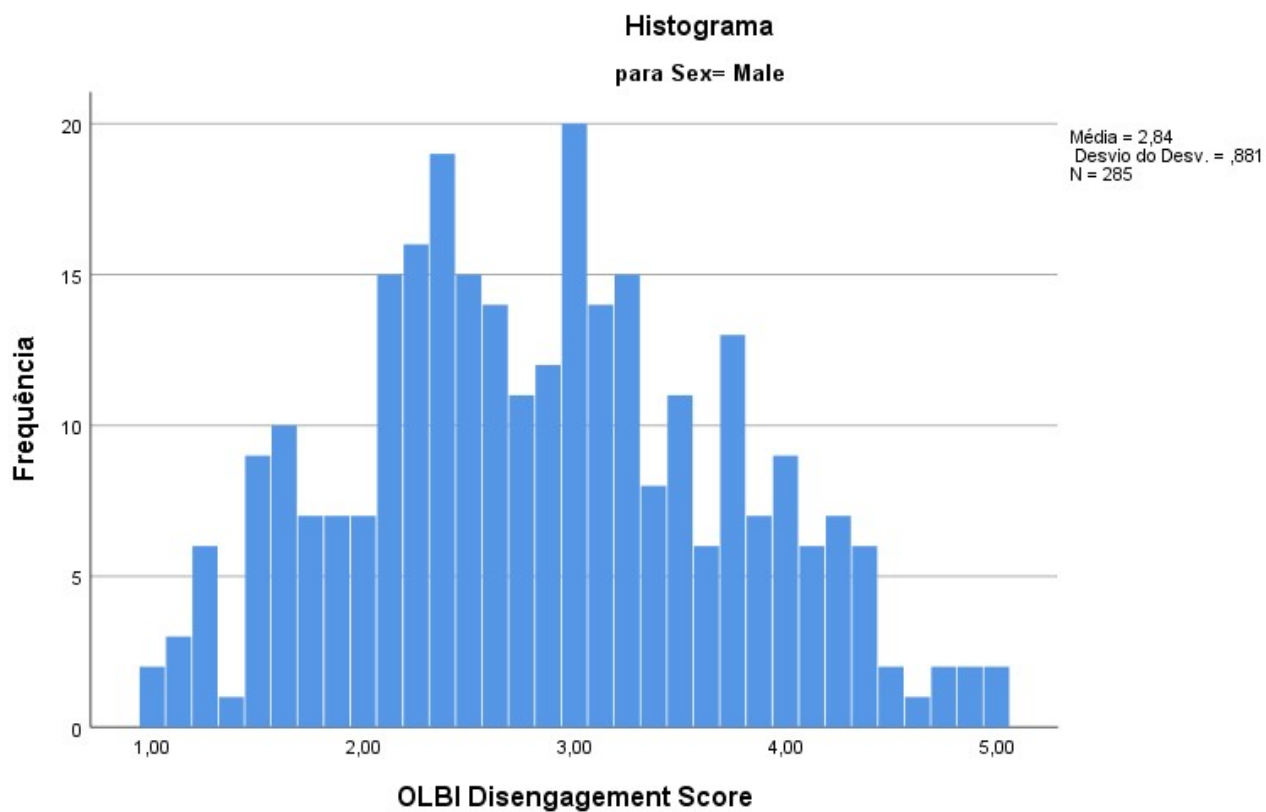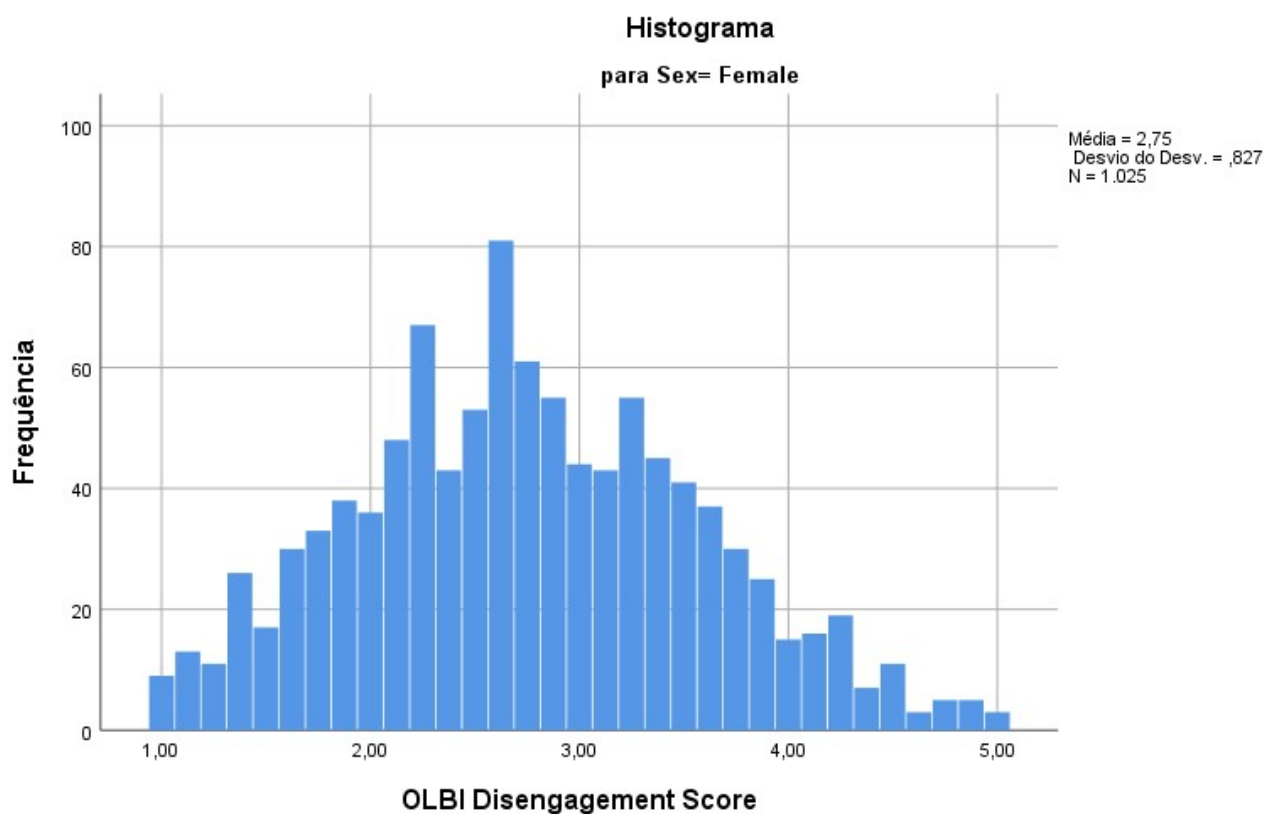

Gráfico Q-Q normais

Gráfico Q-Q Normal de OLBI Disengagement Score

para Sex= Male

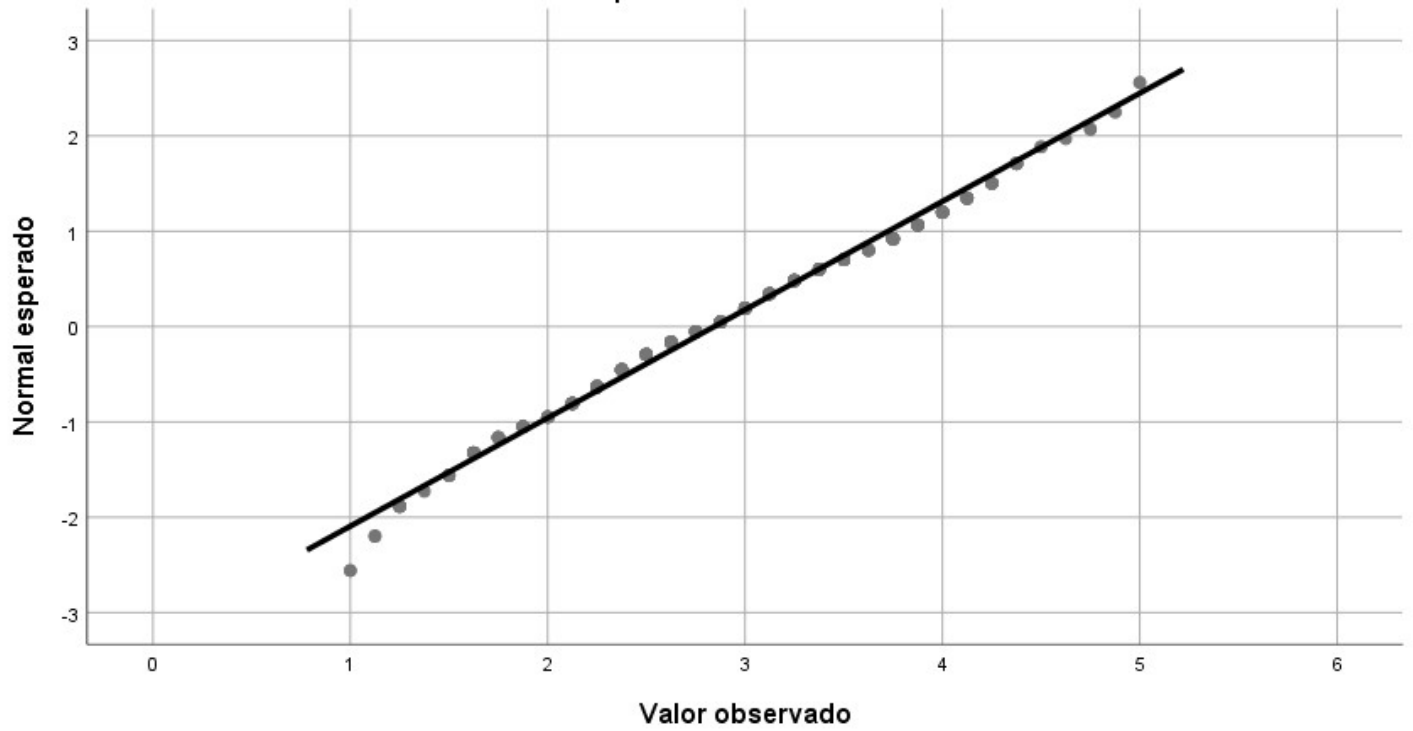

Gráfico Q-Q Normal de OLBI Disengagement Score

para Sex= Female

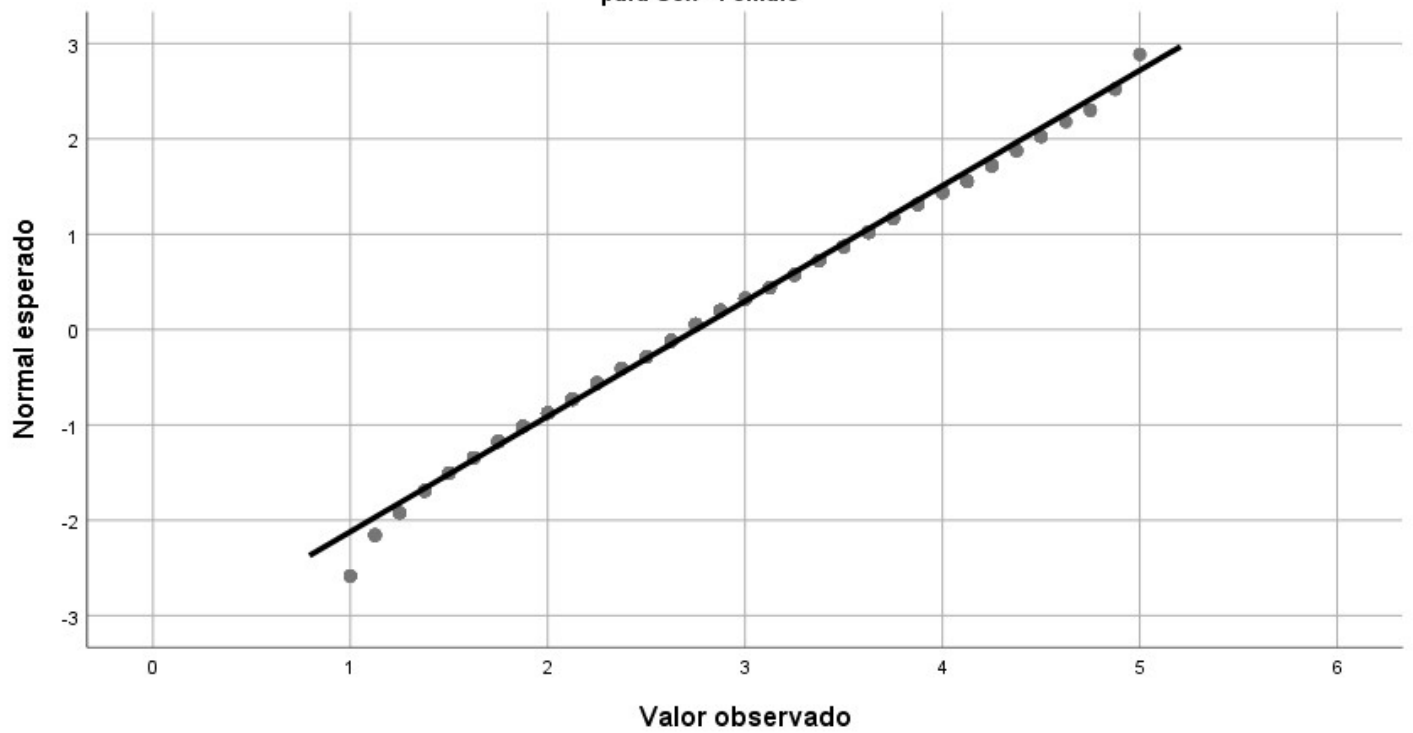

Gráfico Q-Q normais sem tendência

Gráfico Q-Q Normal sem Tendência de OLBI Disengagement Score

para Sex= Male

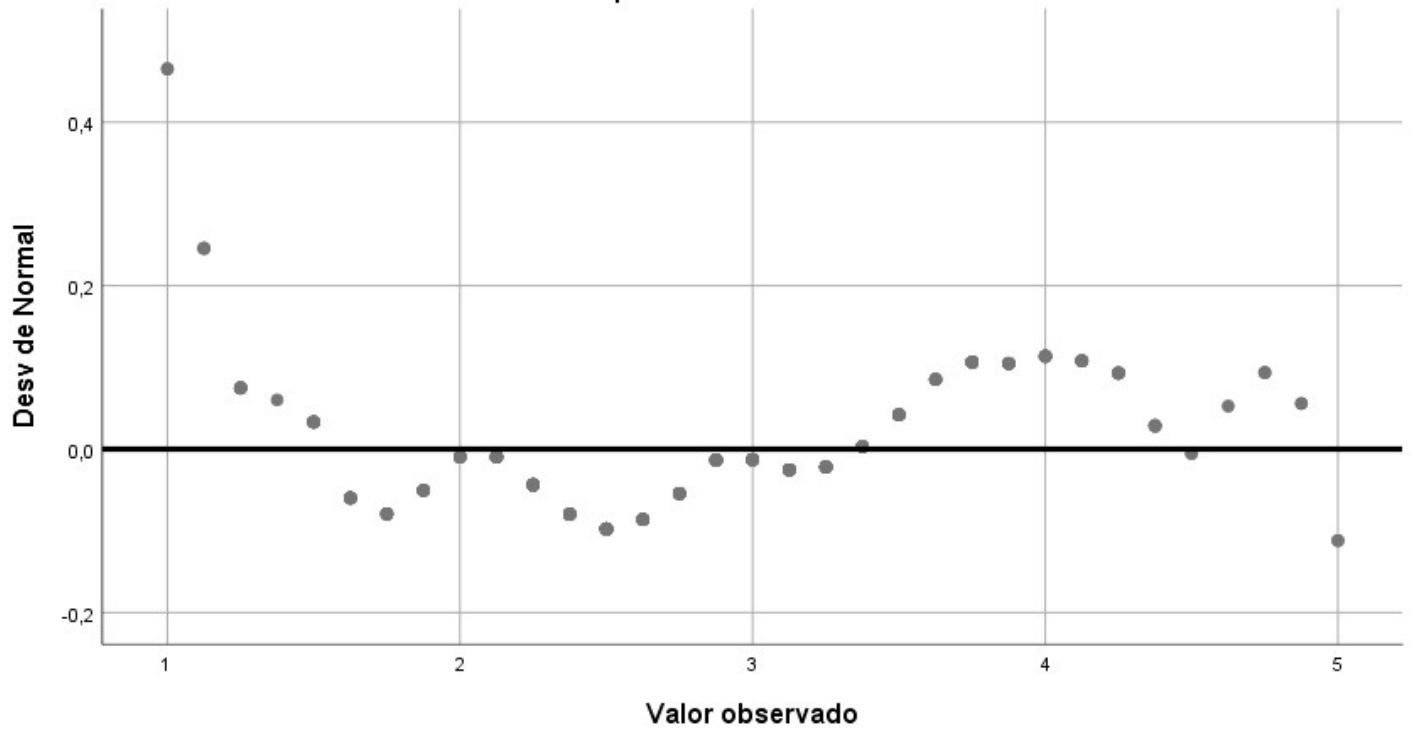

Gráfico Q-Q Normal sem Tendência de OLBI Disengagement Score

para Sex= Female

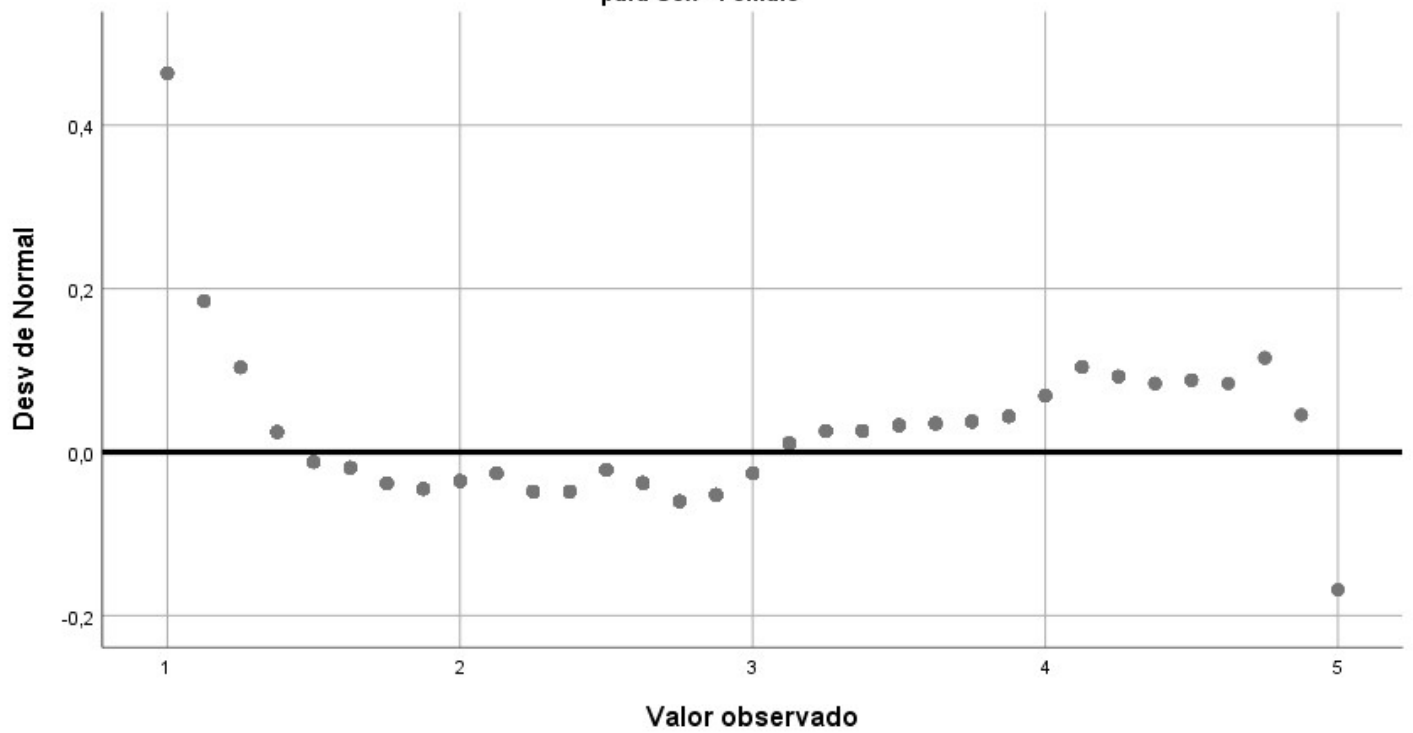

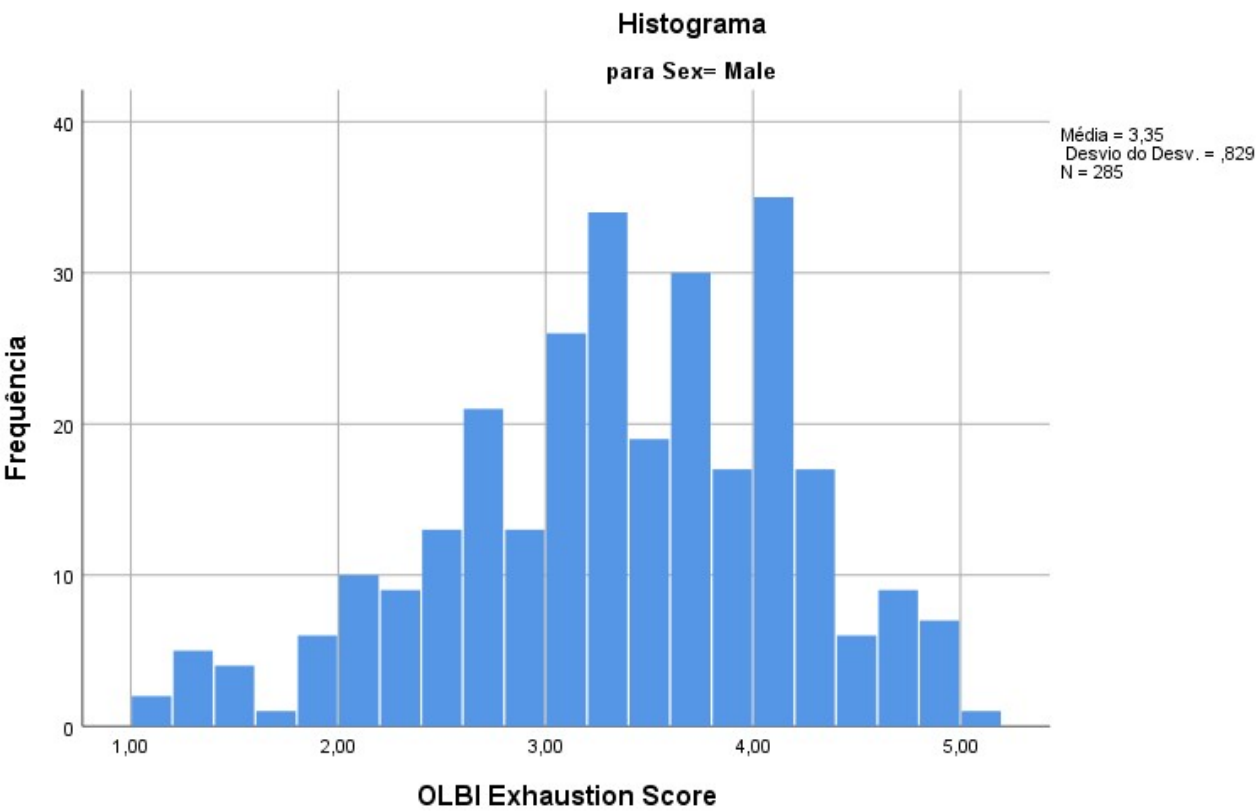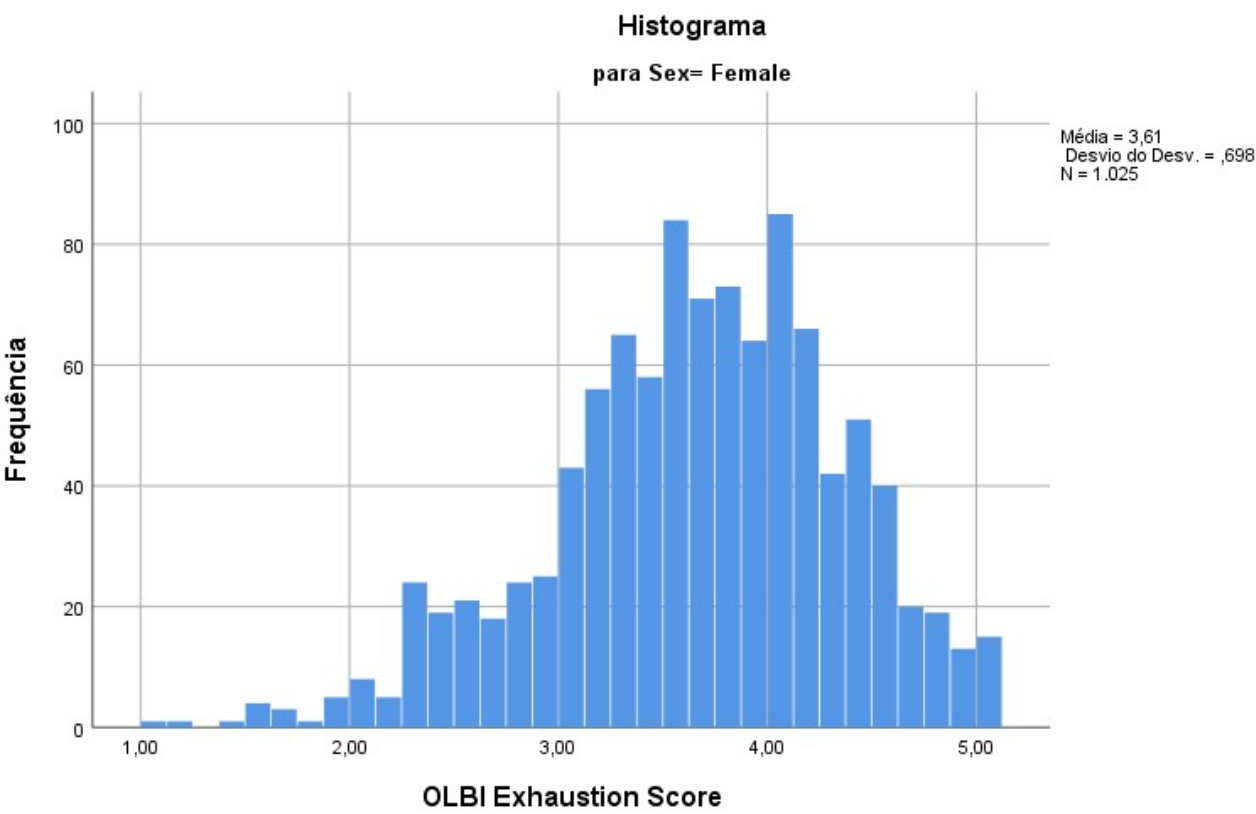

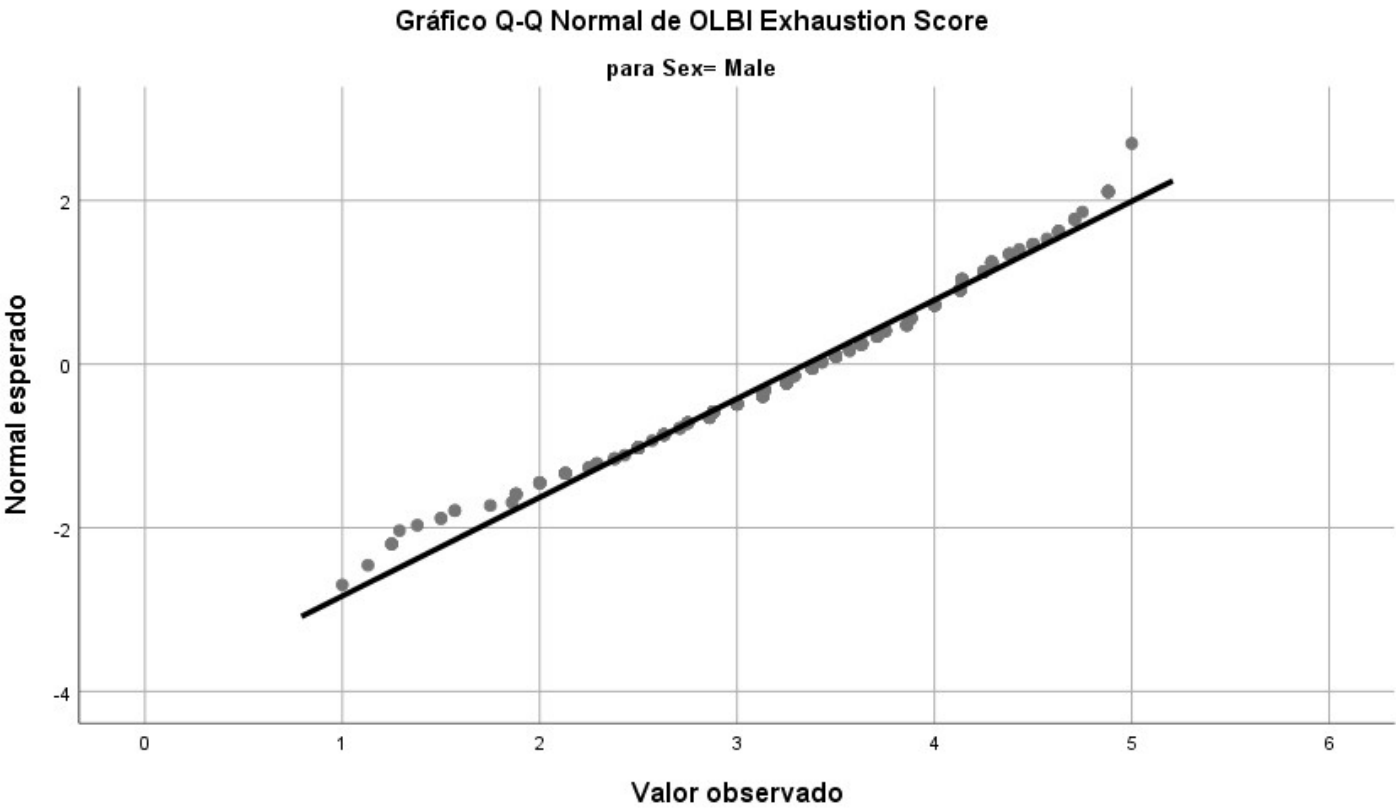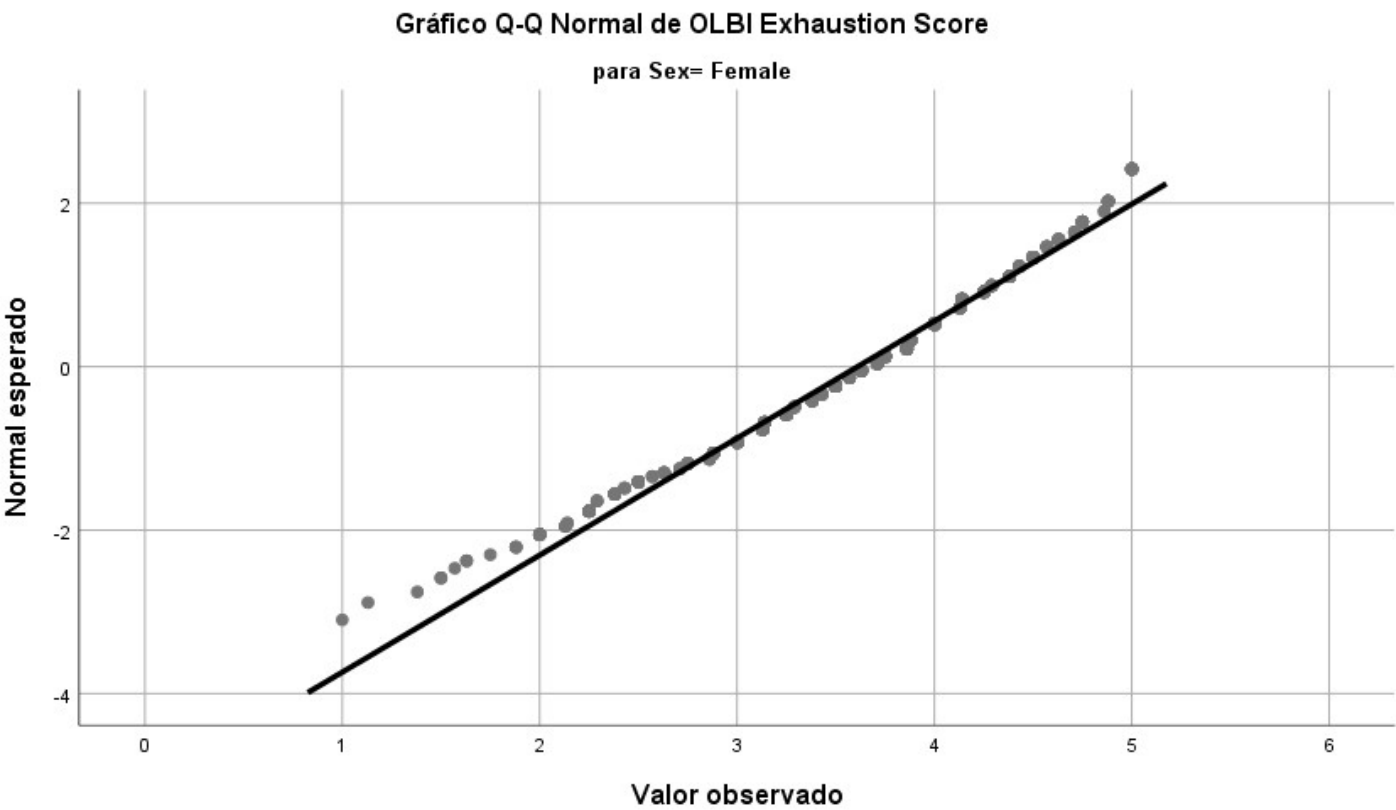

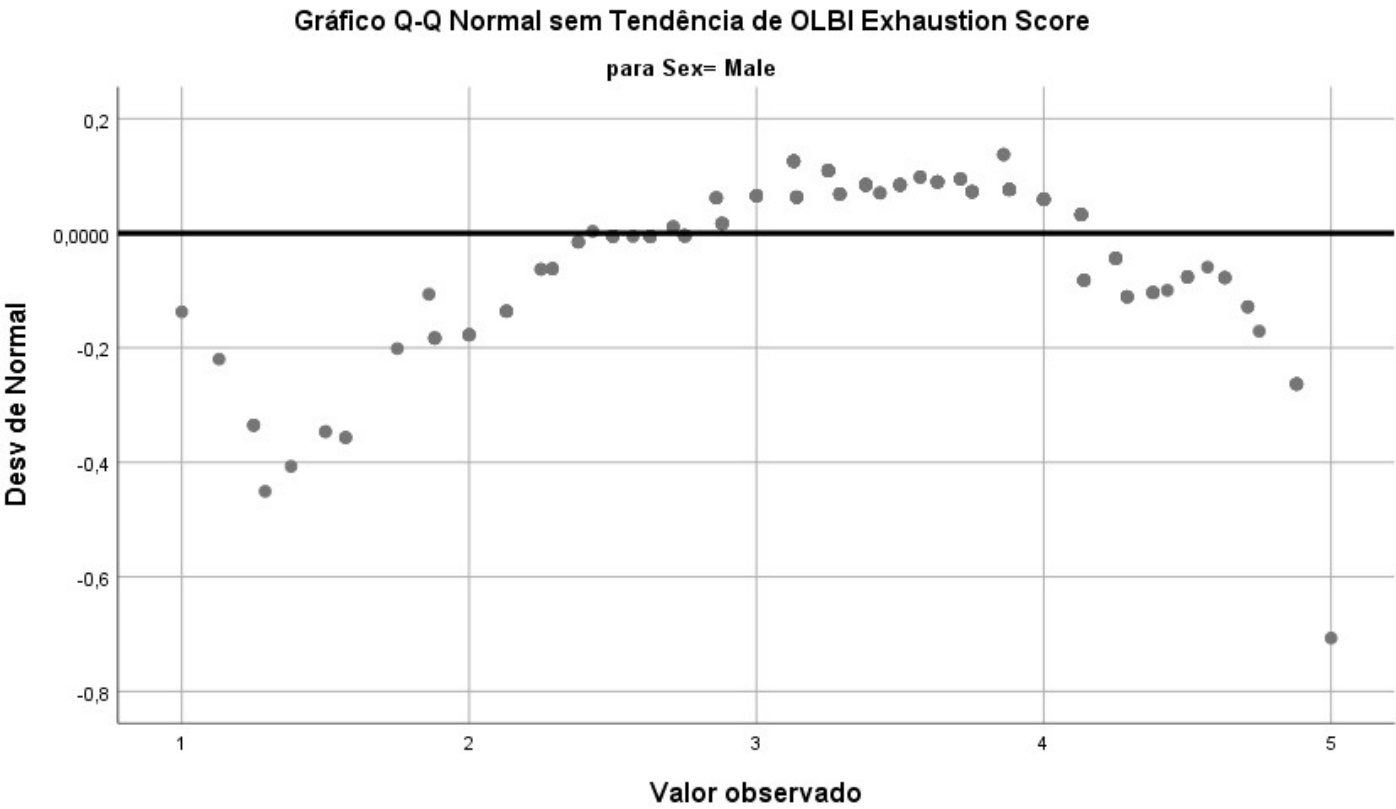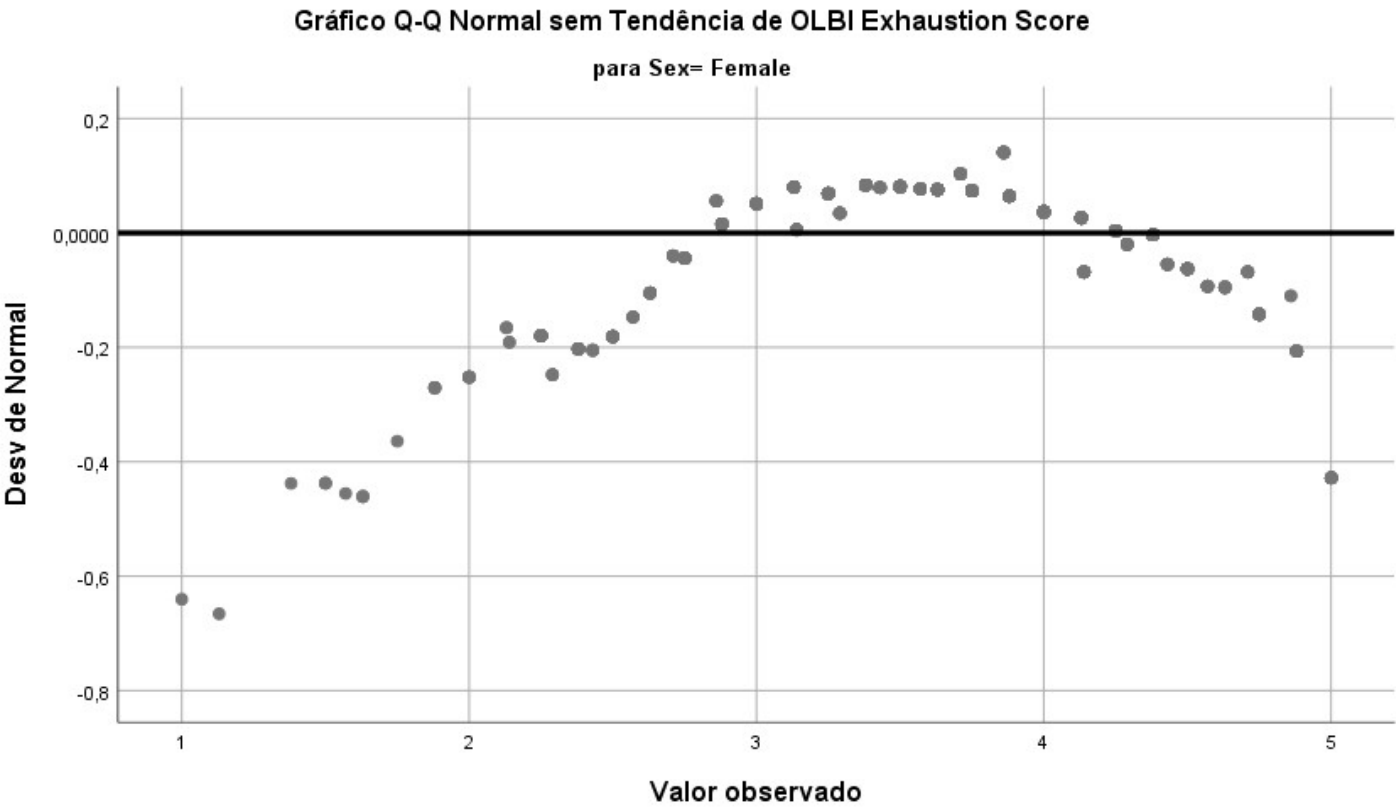

Any comorbidity (regardless COVID risk)

Resumo de processamento do caso

|                                         |     | Válido |             | Omisso |             | Total |             |
|-----------------------------------------|-----|--------|-------------|--------|-------------|-------|-------------|
| Any comorbidity (regardless COVID risk) |     | N      | Porcentagem | N      | Porcentagem | N     | Porcentagem |
| OLBI Disengagement Score                | No  | 1071   | 100,0%      | 0      | 0,0%        | 1071  | 100,0%      |
|                                         | Yes | 234    | 100,0%      | 0      | 0,0%        | 234   | 100,0%      |
| OLBI Exhaustion Score                   | No  | 1071   | 100,0%      | 0      | 0,0%        | 1071  | 100,0%      |
|                                         | Yes | 234    | 100,0%      | 0      | 0,0%        | 234   | 100,0%      |

Descritivos

| Any comorbidity (regardless COVID risk) |     | Estatística                           |                 | Erro Erro |
|-----------------------------------------|-----|---------------------------------------|-----------------|-----------|
| OLBI Disengagement Score                | No  | Média                                 | 2,7317          | ,02510    |
|                                         |     | 95% Intervalo de Confiança para Média | Limite inferior | 2,6824    |
|                                         |     |                                       | Limite superior | 2,7809    |
|                                         |     | 5% da média aparada                   | 2,7208          |           |
|                                         |     | Mediana                               | 2,6250          |           |
|                                         |     | Variância                             | ,675            |           |
|                                         |     | Erro Desvio                           | ,82132          |           |
|                                         |     | Mínimo                                | 1,00            |           |
|                                         |     | Máximo                                | 5,00            |           |
|                                         |     | Intervalo                             | 4,00            |           |
|                                         |     | Amplitude interquartil                | 1,13            |           |
|                                         |     | Assimetria                            | ,192            | ,075      |
|                                         |     | Curtose                               | -,431           | ,149      |
|                                         | Yes | Média                                 | 2,9717          | ,05848    |
|                                         |     | 95% Intervalo de Confiança para Média | Limite inferior | 2,8565    |
|                                         |     |                                       | Limite superior | 3,0869    |
|                                         |     | 5% da média aparada                   | 2,9666          |           |
|                                         |     | Mediana                               | 2,9375          |           |
|                                         |     | Variância                             | ,800            |           |
|                                         |     | Erro Desvio                           | ,89463          |           |
|                                         |     | Mínimo                                | 1,00            |           |
|                                         |     | Máximo                                | 5,00            |           |
|                                         |     | Intervalo                             | 4,00            |           |
|                                         |     | Amplitude interquartil                | 1,28            |           |
|                                         |     | Assimetria                            | ,078            | ,159      |
|                                         |     | Curtose                               | -,483           | ,317      |
| OLBI Exhaustion Score                   | No  | Média                                 | 3,5151          | ,02249    |
|                                         |     | 95% Intervalo de Confiança            | Limite inferior | 3,4710    |

|  |     |  |                            |                 |        |        |
|--|-----|--|----------------------------|-----------------|--------|--------|
|  |     |  | para Média                 | Limite superior | 3,5592 |        |
|  |     |  | 5% da média aparada        |                 | 3,5393 |        |
|  |     |  | Mediana                    |                 | 3,5700 |        |
|  |     |  | Variância                  |                 | ,541   |        |
|  |     |  | Erro Desvio                |                 | ,73586 |        |
|  |     |  | Mínimo                     |                 | 1,00   |        |
|  |     |  | Máximo                     |                 | 5,00   |        |
|  |     |  | Intervalo                  |                 | 4,00   |        |
|  |     |  | Amplitude interquartil     |                 | ,87    |        |
|  |     |  | Assimetria                 |                 | -,508  | ,075   |
|  |     |  | Curtose                    |                 | ,213   | ,149   |
|  | Yes |  | Média                      |                 | 3,7252 | ,04726 |
|  |     |  | 95% Intervalo de Confiança | Limite inferior | 3,6321 |        |
|  |     |  | para Média                 | Limite superior | 3,8183 |        |
|  |     |  | 5% da média aparada        |                 | 3,7534 |        |
|  |     |  | Mediana                    |                 | 3,8600 |        |
|  |     |  | Variância                  |                 | ,523   |        |
|  |     |  | Erro Desvio                |                 | ,72293 |        |
|  |     |  | Mínimo                     |                 | 1,50   |        |
|  |     |  | Máximo                     |                 | 5,00   |        |
|  |     |  | Intervalo                  |                 | 3,50   |        |
|  |     |  | Amplitude interquartil     |                 | ,75    |        |
|  |     |  | Assimetria                 |                 | -,619  | ,159   |
|  |     |  | Curtose                    |                 | ,337   | ,317   |

|                               |                          | Percentis                               |           |        |        |        |        |        |        |
|-------------------------------|--------------------------|-----------------------------------------|-----------|--------|--------|--------|--------|--------|--------|
|                               |                          | Any comorbidity (regardless COVID risk) | Percentis |        |        |        |        |        |        |
|                               |                          |                                         | 5         | 10     | 25     | 50     | 75     | 90     | 95     |
| Média Ponderada (Definição 1) | OLBI Disengagement Score | No                                      | 1,3750    | 1,6250 | 2,1250 | 2,6250 | 3,2500 | 3,8750 | 4,1250 |
|                               |                          | Yes                                     | 1,3750    | 1,7500 | 2,3438 | 2,9375 | 3,6250 | 4,2500 | 4,5000 |
|                               | OLBI Exhaustion Score    | No                                      | 2,2500    | 2,5000 | 3,1300 | 3,5700 | 4,0000 | 4,3800 | 4,6300 |
|                               |                          | Yes                                     | 2,2500    | 2,6700 | 3,3800 | 3,8600 | 4,1300 | 4,6300 | 4,8800 |
| Teste de Tukey                | OLBI Disengagement Score | No                                      |           |        | 2,1250 | 2,6250 | 3,2500 |        |        |
|                               |                          | Yes                                     |           |        | 2,3750 | 2,9375 | 3,6250 |        |        |
|                               | OLBI Exhaustion Score    | No                                      |           |        | 3,1300 | 3,5700 | 4,0000 |        |        |
|                               |                          | Yes                                     |           |        | 3,3800 | 3,8600 | 4,1300 |        |        |

| Testes de Normalidade    |                                            |                                 |      |       |              |      |      |
|--------------------------|--------------------------------------------|---------------------------------|------|-------|--------------|------|------|
|                          | Any comorbidity (regardless<br>COVID risk) | Kolmogorov-Smirnov <sup>a</sup> |      |       | Shapiro-Wilk |      |      |
|                          |                                            | Estatística                     | df   | Sig.  | Estatística  | df   | Sig. |
| OLBI Disengagement Score | No                                         | ,059                            | 1071 | ,000  | ,990         | 1071 | ,000 |
|                          | Yes                                        | ,047                            | 234  | ,200* | ,990         | 234  | ,091 |
| OLBI Exhaustion Score    | No                                         | ,062                            | 1071 | ,000  | ,981         | 1071 | ,000 |

|     |      |     |      |      |     |      |
|-----|------|-----|------|------|-----|------|
| Yes | ,093 | 234 | ,000 | ,963 | 234 | ,000 |
|-----|------|-----|------|------|-----|------|

\*. Este é um limite inferior da significância verdadeira.

a. Correlação de Significância de Lilliefors

OLBI Disengagement Score

Histogramas

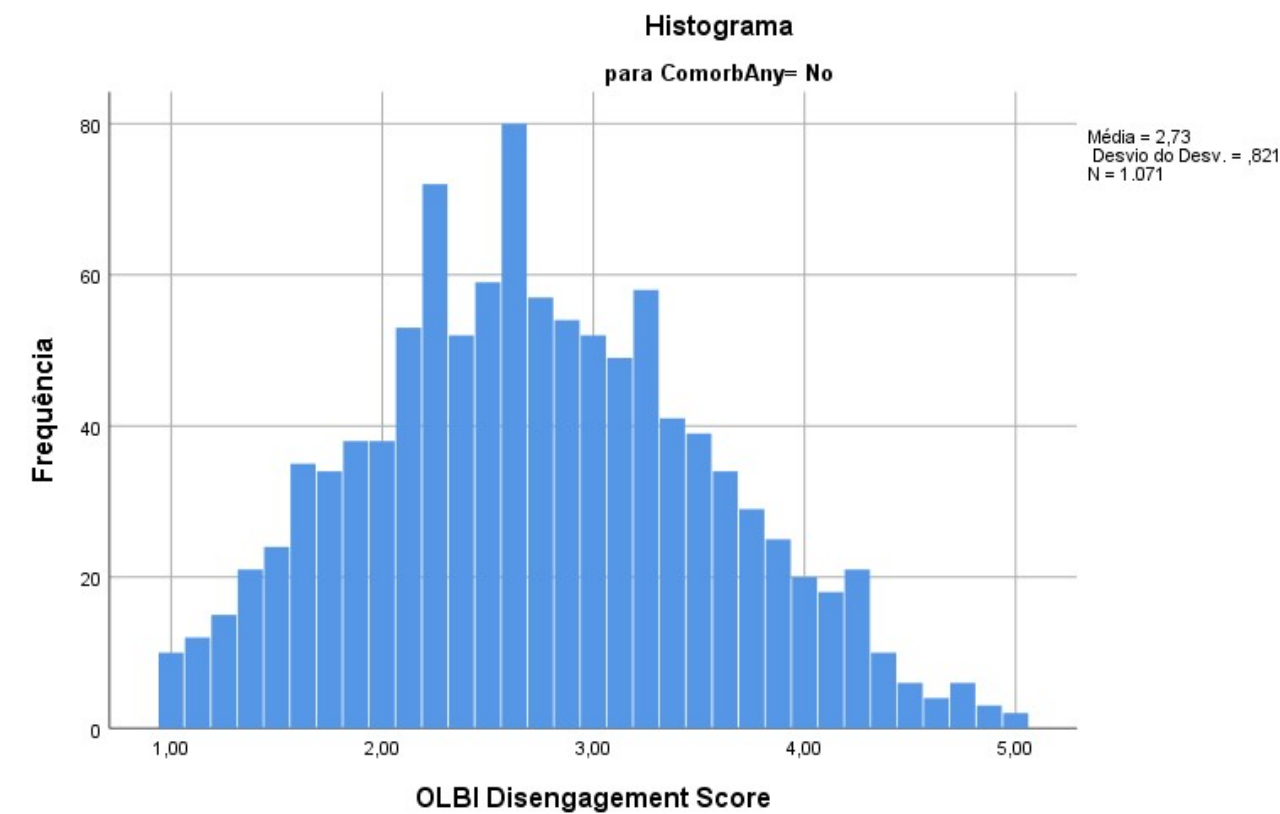

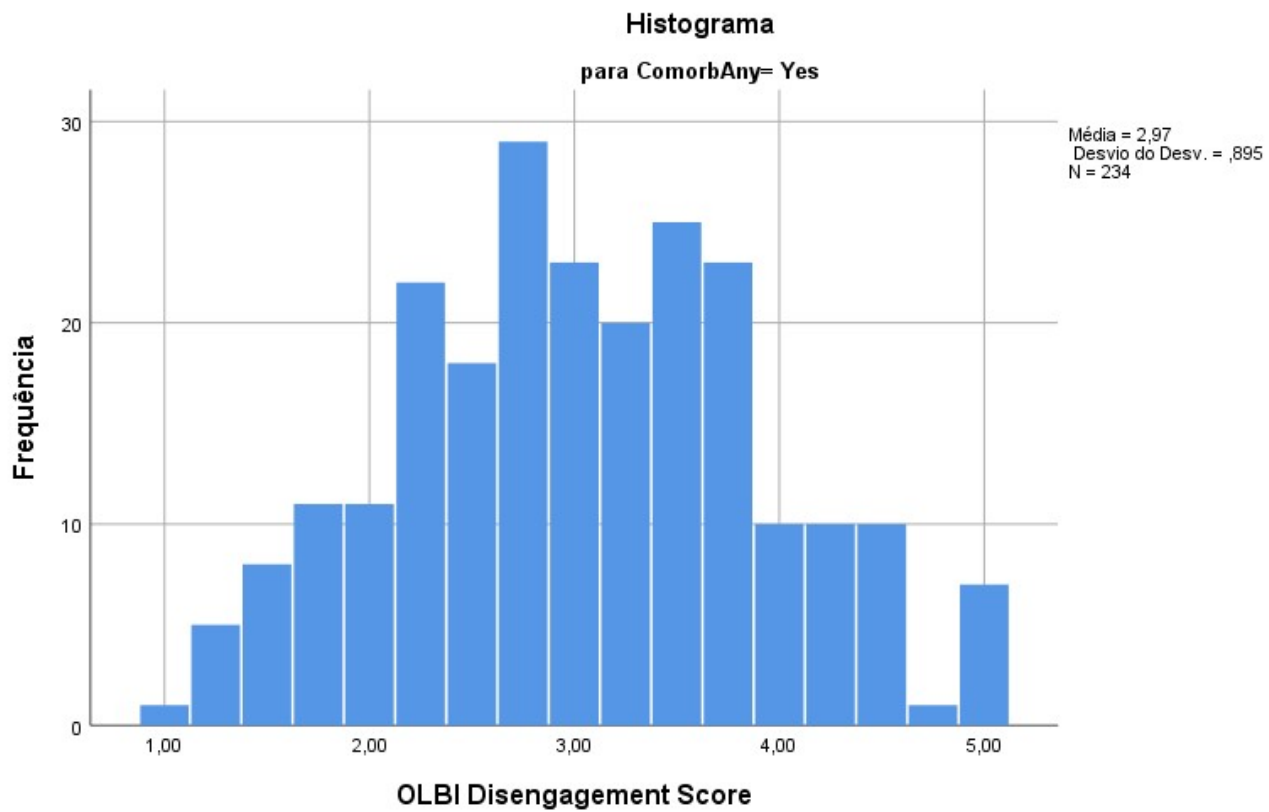

Gráfico Q-Q normais

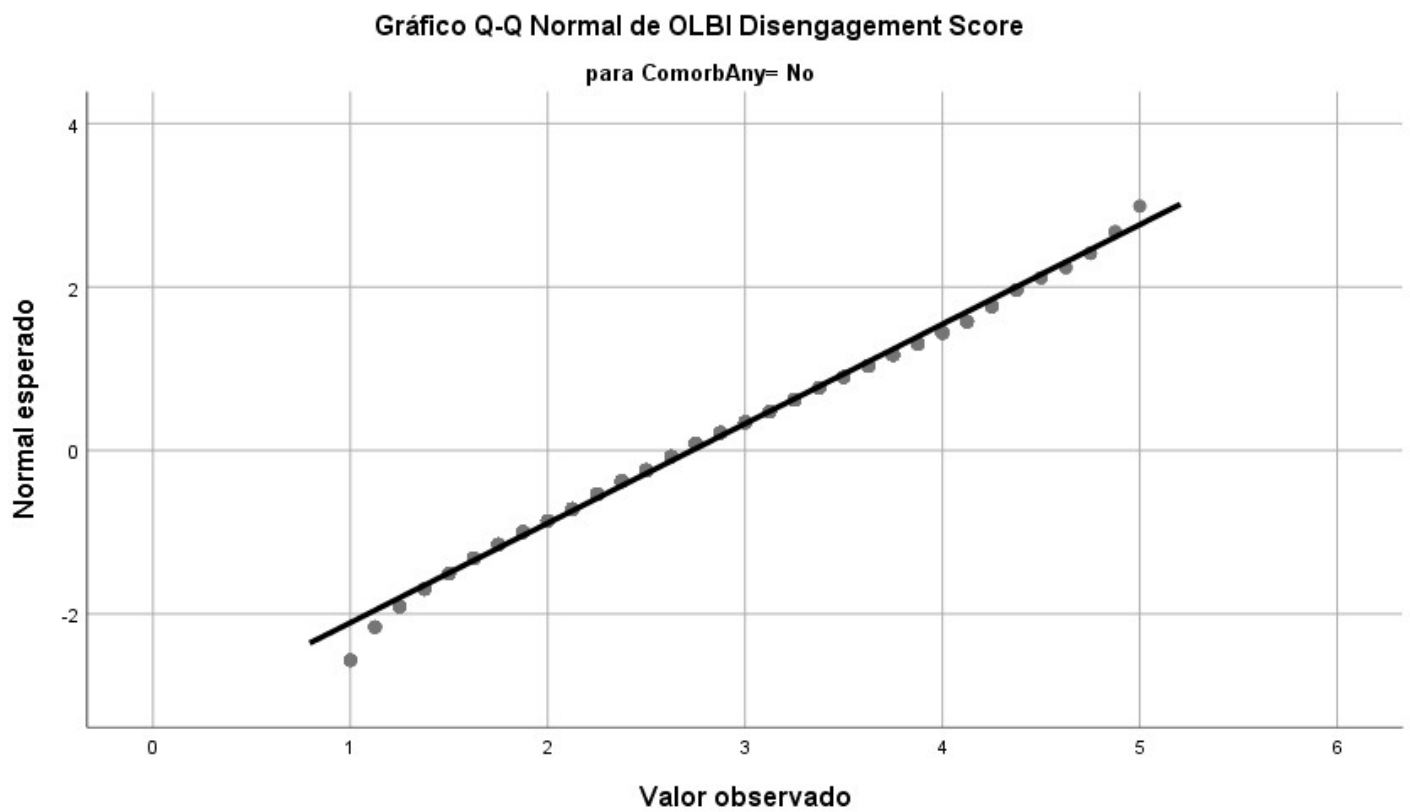

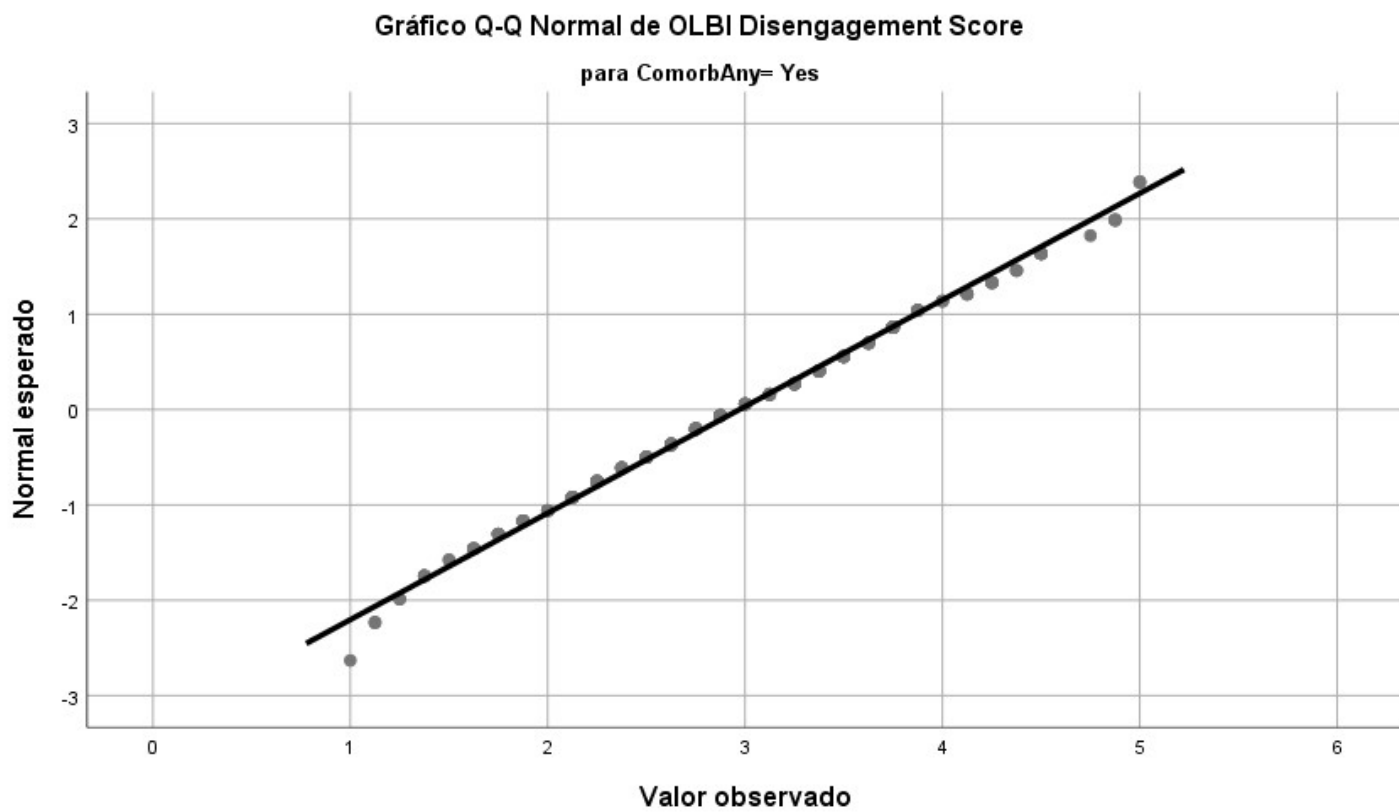

Gráfico Q-Q normais sem tendência

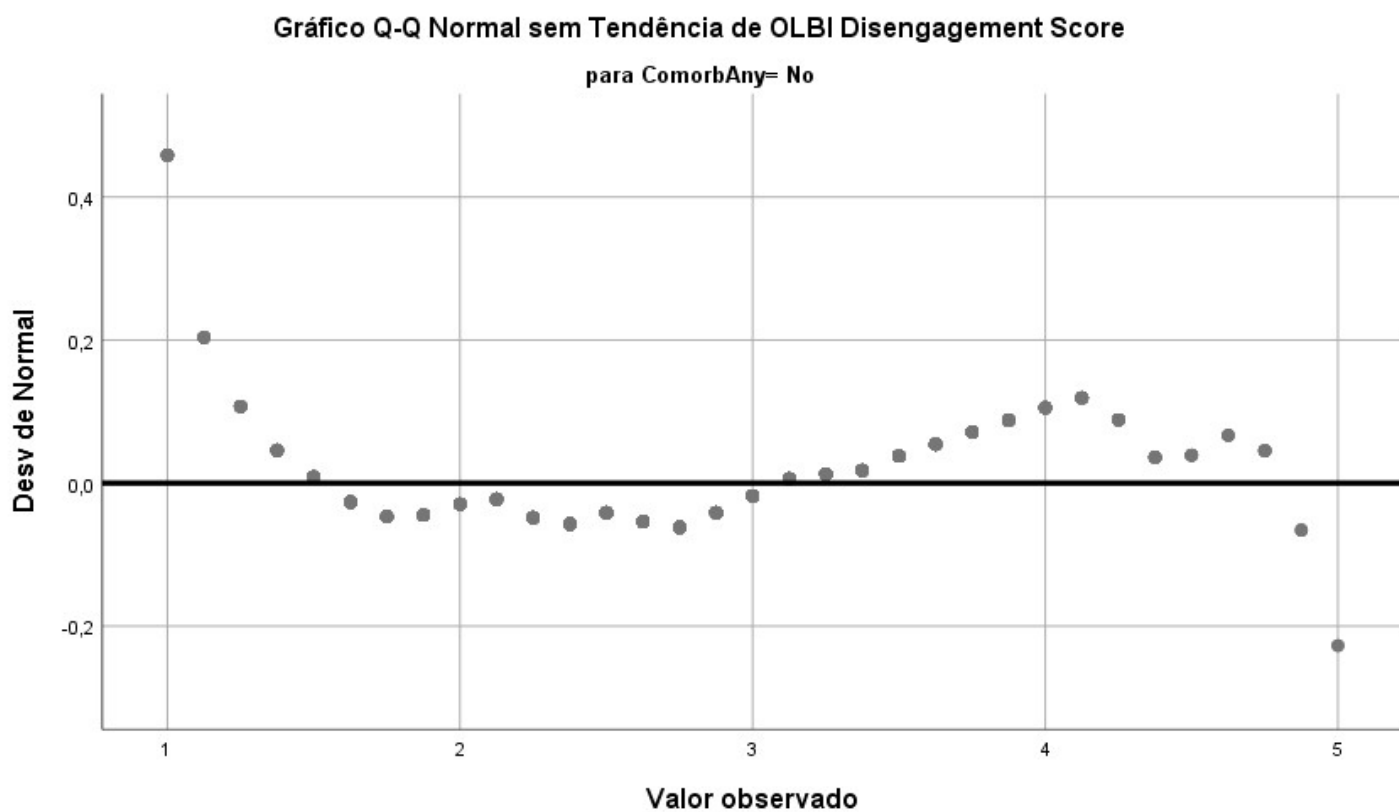

### Gráfico Q-Q Normal sem Tendência de OLBI Disengagement Score

para ComorbAny= Yes

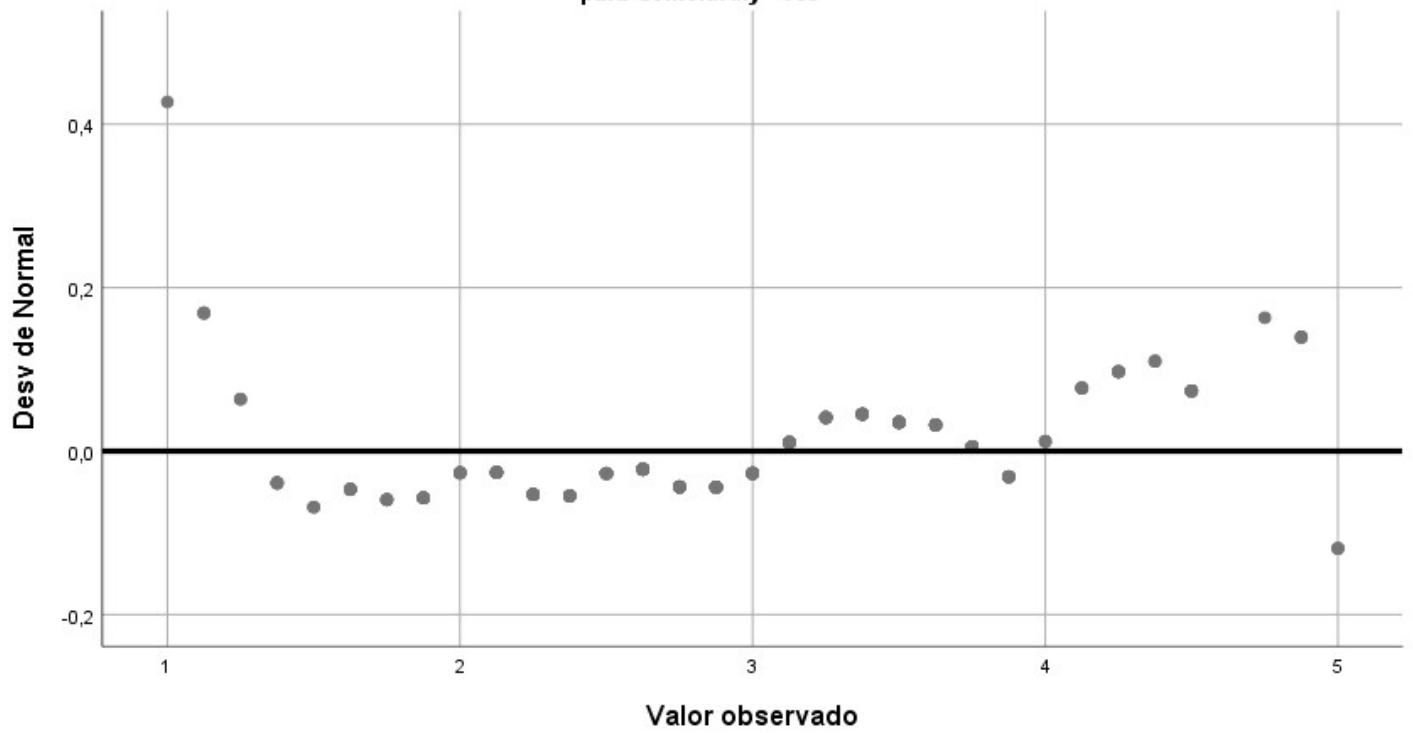

OLBI Exhaustion Score

Histogramas

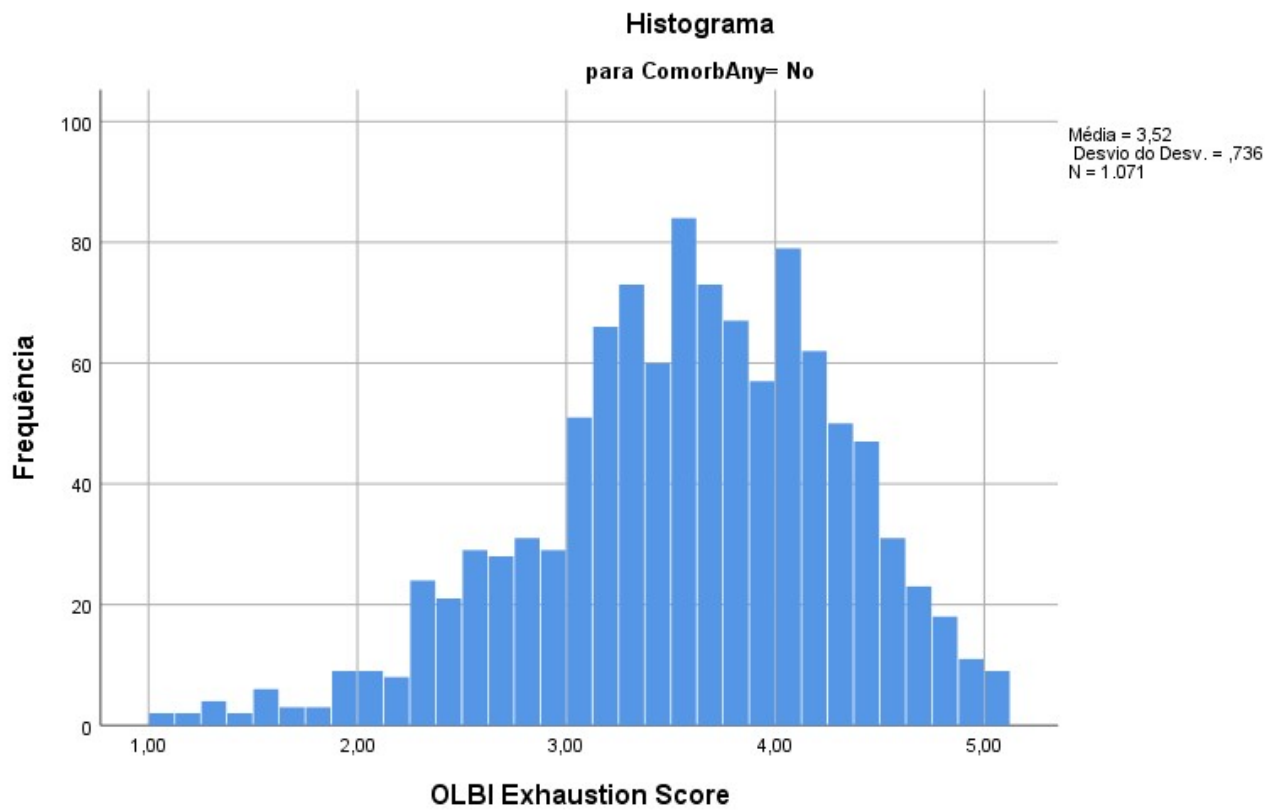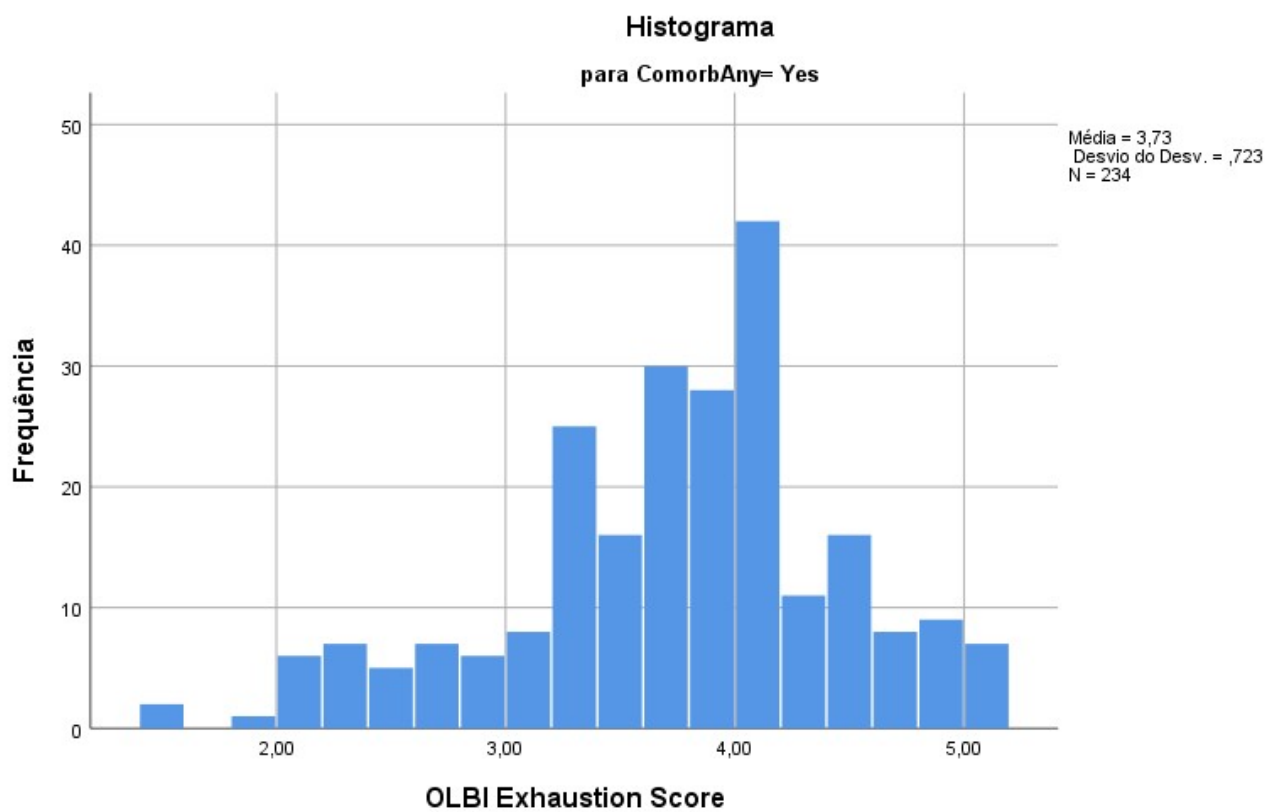

Gráfico Q-Q normais

Gráfico Q-Q Normal de OLBI Exhaustion Score

para ComorbAny= No

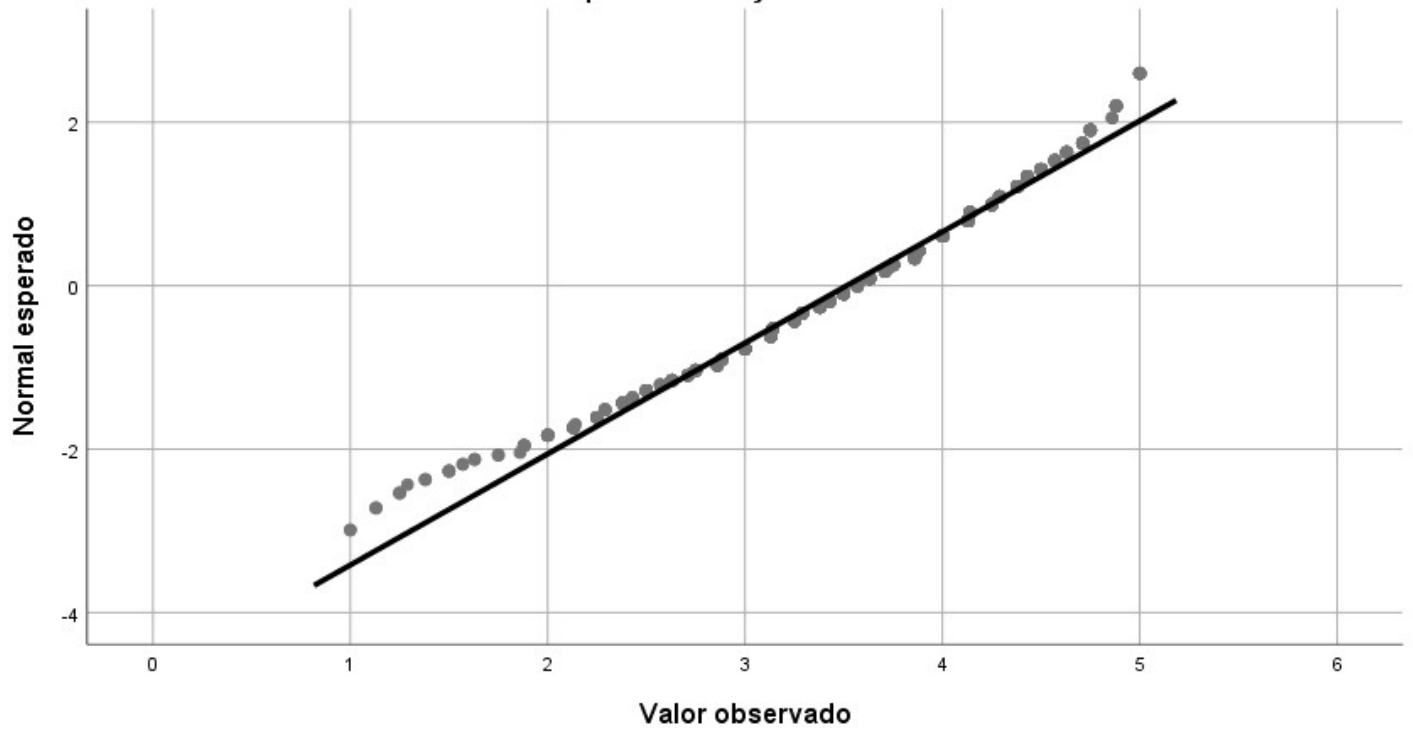

Gráfico Q-Q Normal de OLBI Exhaustion Score

para ComorbAny= Yes

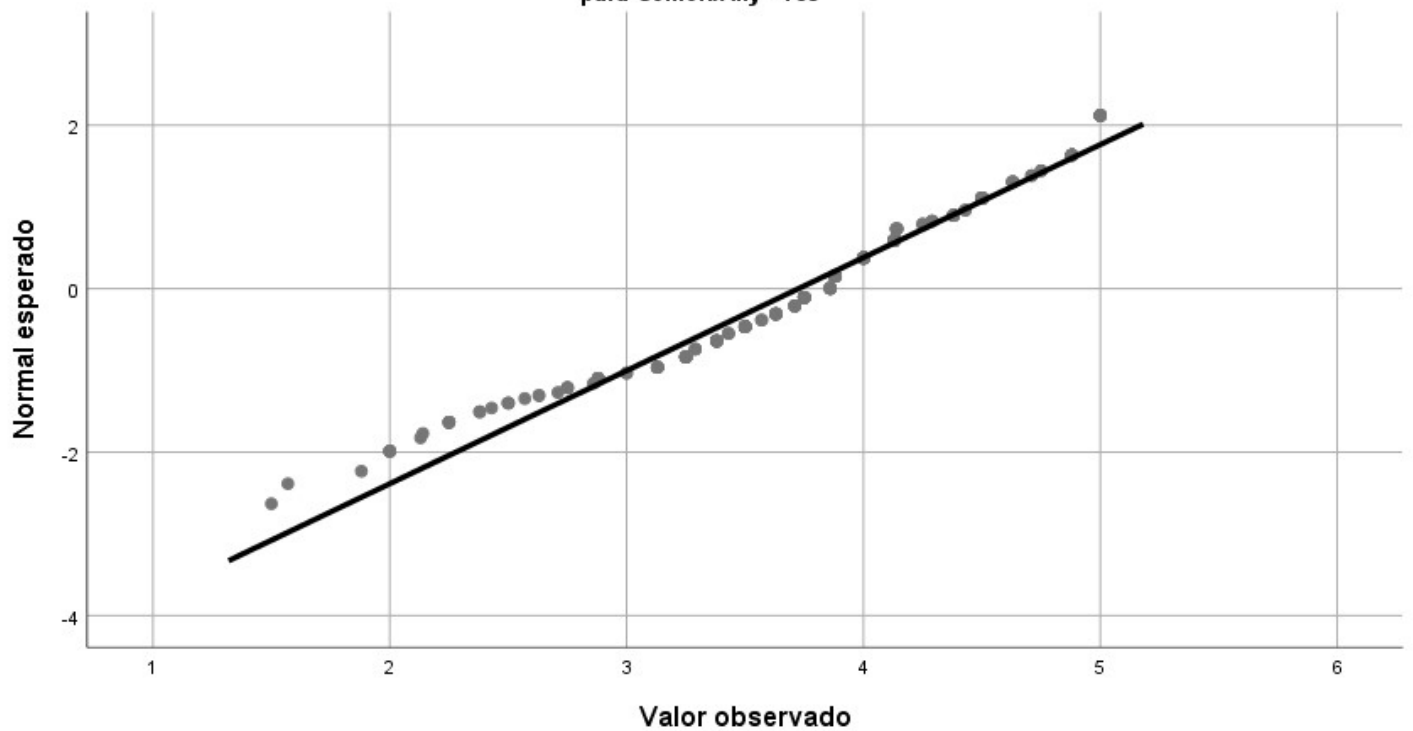

Gráfico Q-Q normais sem tendência

Gráfico Q-Q Normal sem Tendência de OLBI Exhaustion Score

para ComorbAny= No

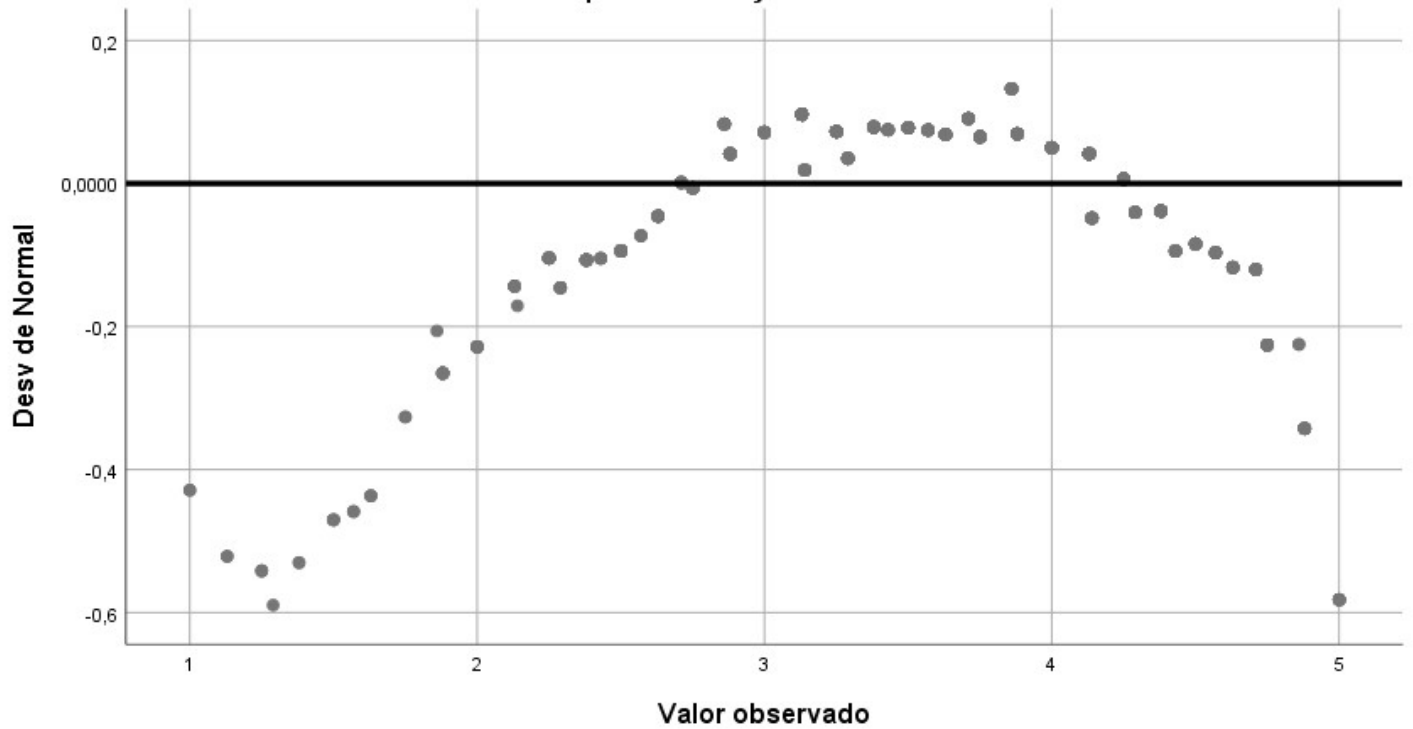

Gráfico Q-Q Normal sem Tendência de OLBI Exhaustion Score

para ComorbAny= Yes

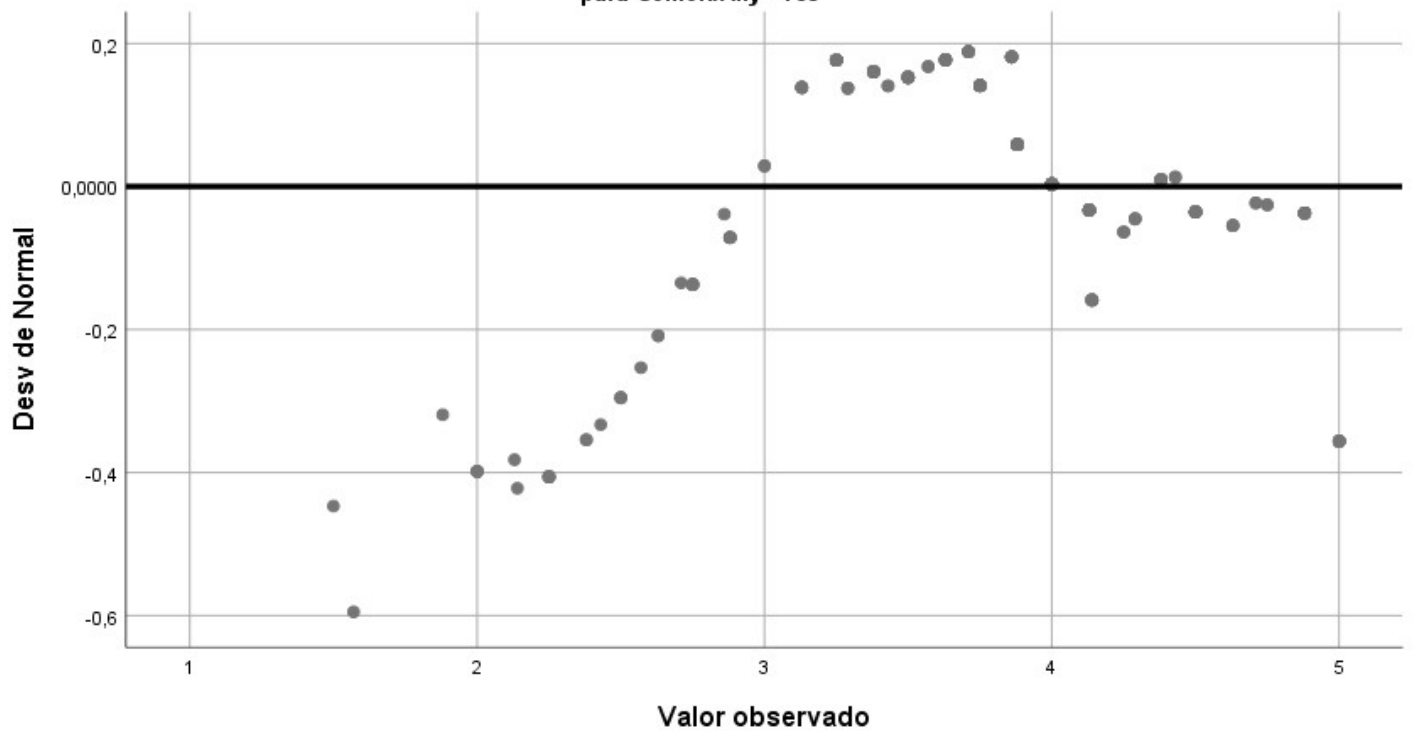

Resumo de processamento do caso

|                          |                  | Válido |             | Casos Omisso |             | Total |             |
|--------------------------|------------------|--------|-------------|--------------|-------------|-------|-------------|
| BRCS Classification      |                  | N      | Porcentagem | N            | Porcentagem | N     | Porcentagem |
| OLBI Disengagement Score | Low resilience   | 813    | 100,0%      | 0            | 0,0%        | 813   | 100,0%      |
|                          | Moderate to High | 500    | 100,0%      | 0            | 0,0%        | 500   | 100,0%      |
| OLBI Exhaustion Score    | Low resilience   | 813    | 100,0%      | 0            | 0,0%        | 813   | 100,0%      |
|                          | Moderate to High | 500    | 100,0%      | 0            | 0,0%        | 500   | 100,0%      |

Descritivos

| BRCS Classification      |                  | Estatística                                     |        | Erro Erro |
|--------------------------|------------------|-------------------------------------------------|--------|-----------|
| OLBI Disengagement Score | Low resilience   | Média                                           | 2,9845 | ,02784    |
|                          |                  | 95% Intervalo de Confiança para Limite inferior | 2,9298 |           |
|                          |                  | Média Limite superior                           | 3,0391 |           |
|                          |                  | 5% da média aparada                             | 2,9773 |           |
|                          |                  | Mediana                                         | 3,0000 |           |
|                          |                  | Variância                                       | ,630   |           |
|                          |                  | Erro Desvio                                     | ,79388 |           |
|                          |                  | Mínimo                                          | 1,13   |           |
|                          |                  | Máximo                                          | 5,00   |           |
|                          |                  | Intervalo                                       | 3,88   |           |
|                          |                  | Amplitude interquartil                          | 1,13   |           |
|                          |                  | Assimetria                                      | ,153   | ,086      |
|                          | Moderate to High | Curtose                                         | -,439  | ,171      |
|                          |                  | Média                                           | 2,4318 | ,03572    |
|                          |                  | 95% Intervalo de Confiança para Limite inferior | 2,3616 |           |
|                          |                  | Média Limite superior                           | 2,5019 |           |
|                          |                  | 5% da média aparada                             | 2,4086 |           |
|                          |                  | Mediana                                         | 2,3750 |           |
|                          |                  | Variância                                       | ,638   |           |
|                          |                  | Erro Desvio                                     | ,79865 |           |
|                          |                  | Mínimo                                          | 1,00   |           |
|                          |                  | Máximo                                          | 5,00   |           |
|                          |                  | Intervalo                                       | 4,00   |           |
|                          |                  | Amplitude interquartil                          | 1,13   |           |
|                          |                  | Assimetria                                      | ,388   | ,109      |
|                          |                  | Curtose                                         | -,208  | ,218      |
| OLBI Exhaustion Score    | Low resilience   | Média                                           | 3,7136 | ,02398    |
|                          |                  | 95% Intervalo de Confiança para Limite inferior | 3,6665 |           |
|                          |                  | Média Limite superior                           | 3,7606 |           |
|                          |                  | 5% da média aparada                             | 3,7349 |           |
|                          |                  | Mediana                                         | 3,7500 |           |
|                          |                  | Variância                                       | ,467   |           |

|                  |                                 |                        |                 |        |        |
|------------------|---------------------------------|------------------------|-----------------|--------|--------|
|                  |                                 | Erro Desvio            |                 | ,68374 |        |
|                  |                                 | Mínimo                 |                 | 1,25   |        |
|                  |                                 | Máximo                 |                 | 5,00   |        |
|                  |                                 | Intervalo              |                 | 3,75   |        |
|                  |                                 | Amplitude interquartil |                 | ,89    |        |
|                  |                                 | Assimetria             |                 | -,489  | ,086   |
|                  |                                 | Curtose                |                 | ,114   | ,171   |
| Moderate to High |                                 | Média                  |                 | 3,2961 | ,03336 |
|                  | 95% Intervalo de Confiança para | Limite inferior        |                 | 3,2306 |        |
|                  |                                 | Média                  | Limite superior | 3,3617 |        |
|                  | 5% da média aparada             |                        |                 | 3,3209 |        |
|                  | Mediana                         |                        |                 | 3,3800 |        |
|                  | Variância                       |                        |                 | ,556   |        |
|                  | Erro Desvio                     |                        |                 | ,74592 |        |
|                  | Mínimo                          |                        |                 | 1,00   |        |
|                  | Máximo                          |                        |                 | 5,00   |        |
|                  | Intervalo                       |                        |                 | 4,00   |        |
|                  | Amplitude interquartil          |                        |                 | 1,00   |        |
|                  | Assimetria                      |                        |                 | -,525  | ,109   |
|                  | Curtose                         |                        |                 | ,164   | ,218   |

|                               |                          | Percentis           |           |        |        |        |        |        |        |
|-------------------------------|--------------------------|---------------------|-----------|--------|--------|--------|--------|--------|--------|
|                               |                          |                     | Percentis |        |        |        |        |        |        |
|                               |                          | BRCS Classification | 5         | 10     | 25     | 50     | 75     | 90     | 95     |
| Média Ponderada (Definição 1) | OLBI Disengagement Score | Low resilience      | 1,7500    | 2,0000 | 2,3750 | 3,0000 | 3,5000 | 4,1250 | 4,3750 |
|                               |                          | Moderate to High    | 1,2500    | 1,3750 | 1,8750 | 2,3750 | 3,0000 | 3,5000 | 3,8750 |
|                               | OLBI Exhaustion Score    | Low resilience      | 2,5000    | 2,7500 | 3,2500 | 3,7500 | 4,1400 | 4,5700 | 4,7500 |
|                               |                          | Moderate to High    | 2,0000    | 2,2500 | 2,8800 | 3,3800 | 3,8800 | 4,1300 | 4,3800 |
| Teste de Tukey                | OLBI Disengagement Score | Low resilience      |           |        | 2,3750 | 3,0000 | 3,5000 |        |        |
|                               |                          | Moderate to High    |           |        | 1,8750 | 2,3750 | 3,0000 |        |        |
|                               | OLBI Exhaustion Score    | Low resilience      |           |        | 3,2500 | 3,7500 | 4,1400 |        |        |
|                               |                          | Moderate to High    |           |        | 2,8800 | 3,3800 | 3,8800 |        |        |

|                          |                  | Testes de Normalidade           |             |     |              |             |     |      |
|--------------------------|------------------|---------------------------------|-------------|-----|--------------|-------------|-----|------|
|                          |                  | Kolmogorov-Smirnov <sup>a</sup> |             |     | Shapiro-Wilk |             |     |      |
|                          |                  | BRCS Classification             | Estatística | df  | Sig.         | Estatística | df  | Sig. |
| OLBI Disengagement Score | Low resilience   |                                 | ,058        | 813 | ,000         | ,991        | 813 | ,000 |
|                          | Moderate to High |                                 | ,063        | 500 | ,000         | ,981        | 500 | ,000 |
| OLBI Exhaustion Score    | Low resilience   |                                 | ,063        | 813 | ,000         | ,980        | 813 | ,000 |
|                          | Moderate to High |                                 | ,078        | 500 | ,000         | ,978        | 500 | ,000 |

a. Correlação de Significância de Lilliefors

Histogramas

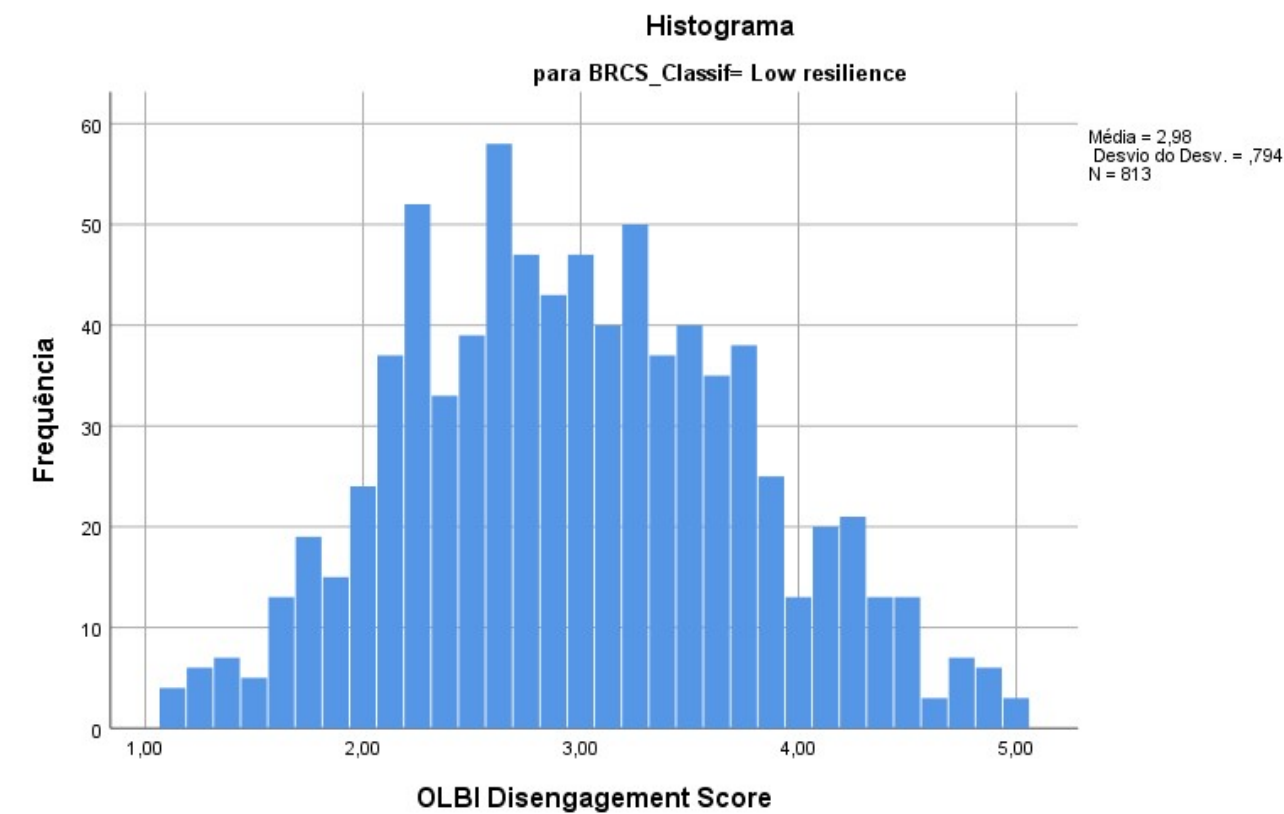

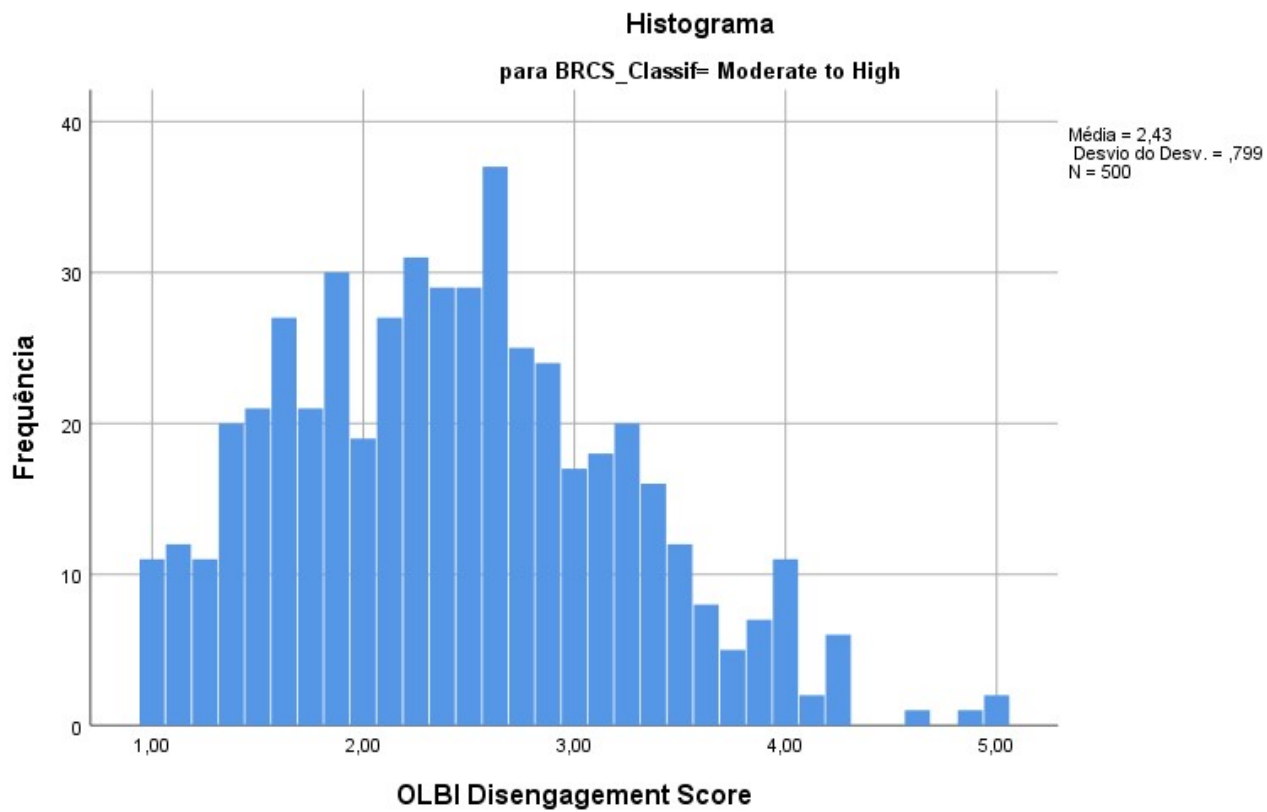

Gráfico Q-Q normais

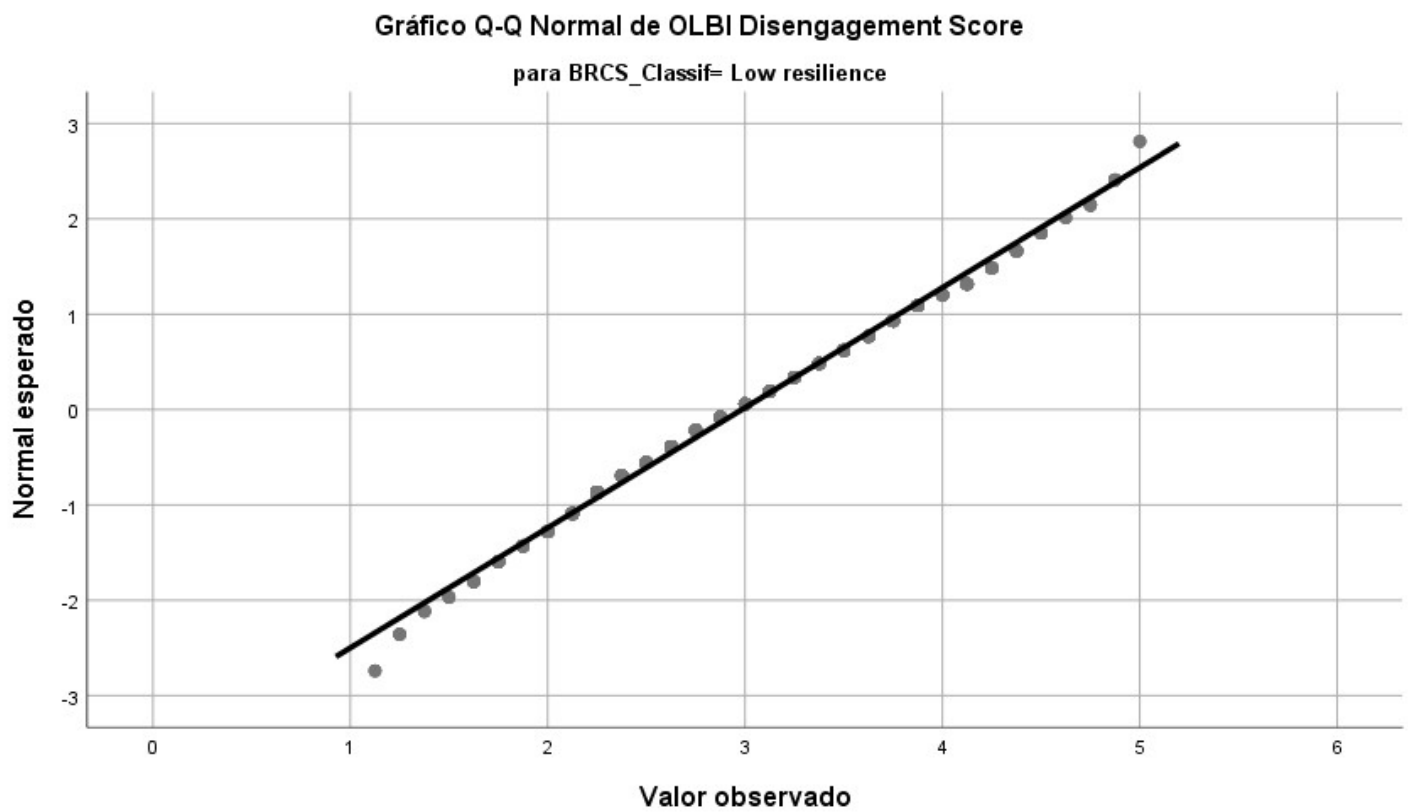

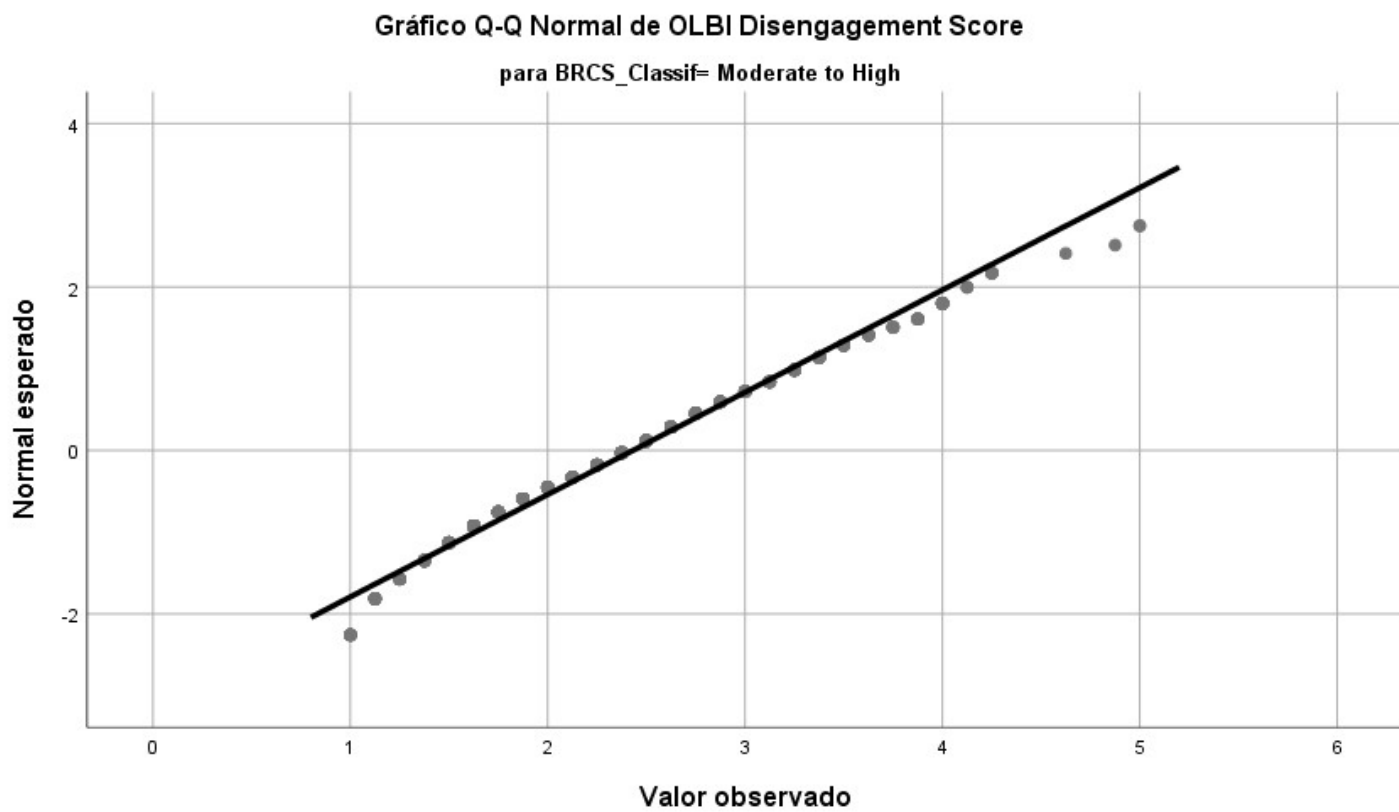

Gráfico Q-Q normais sem tendência

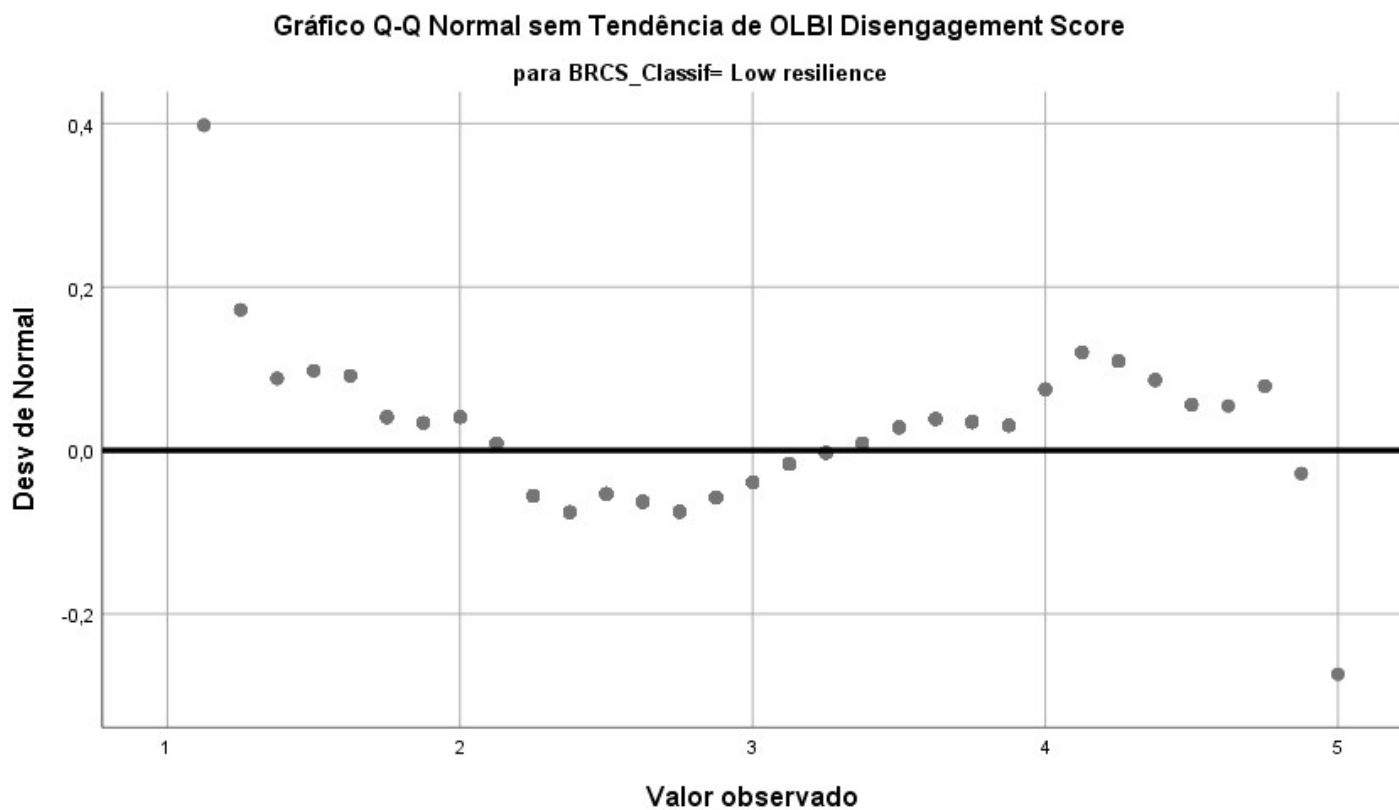

Gráfico Q-Q Normal sem Tendência de OLBI Disengagement Score  
para BRCS\_Classif= Moderate to High

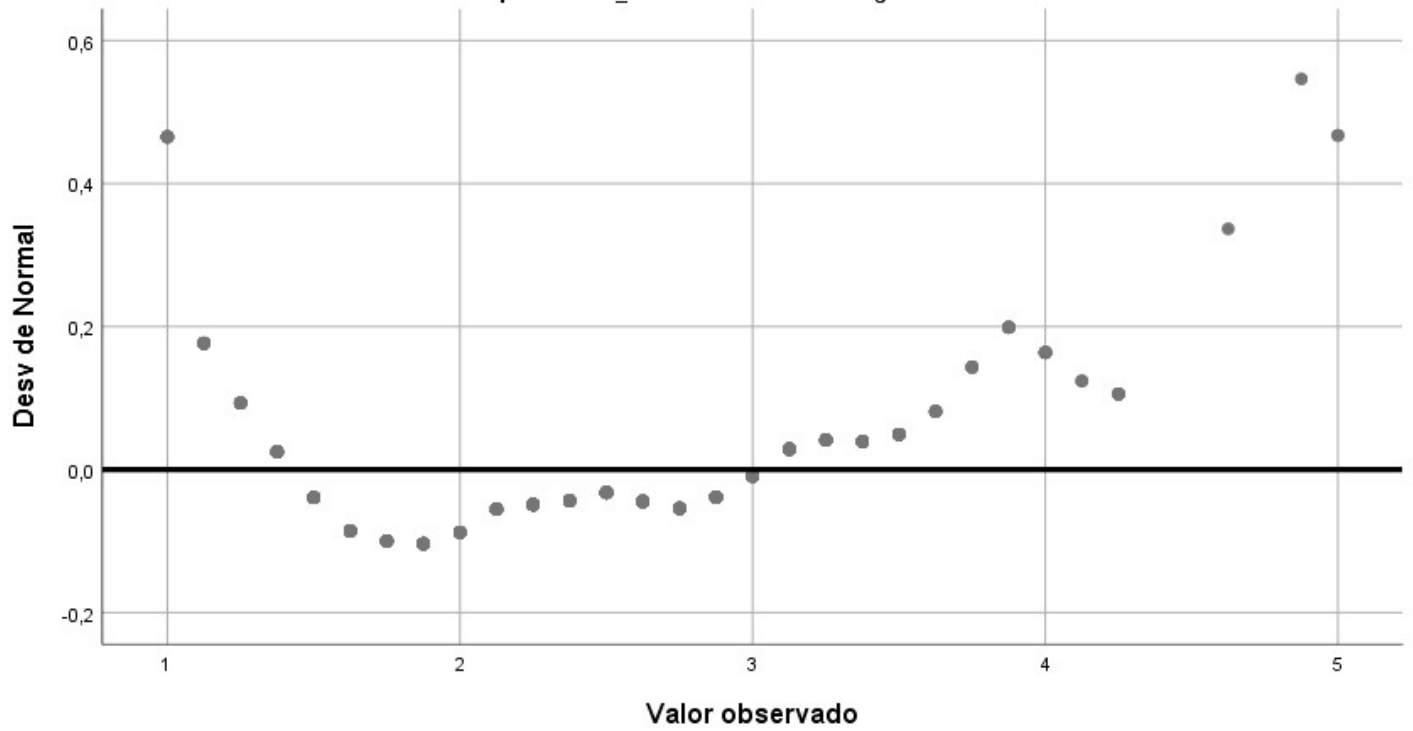

OLBI Exhaustion Score

Histogramas

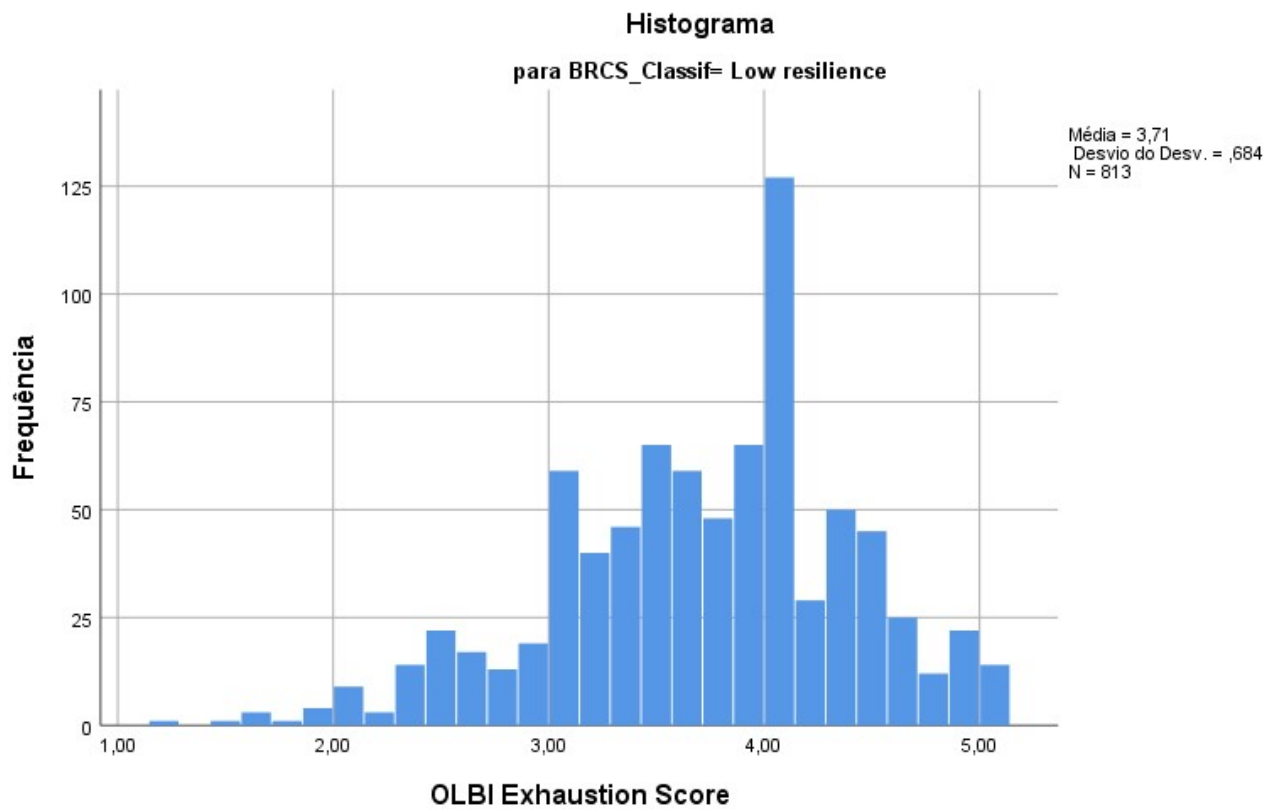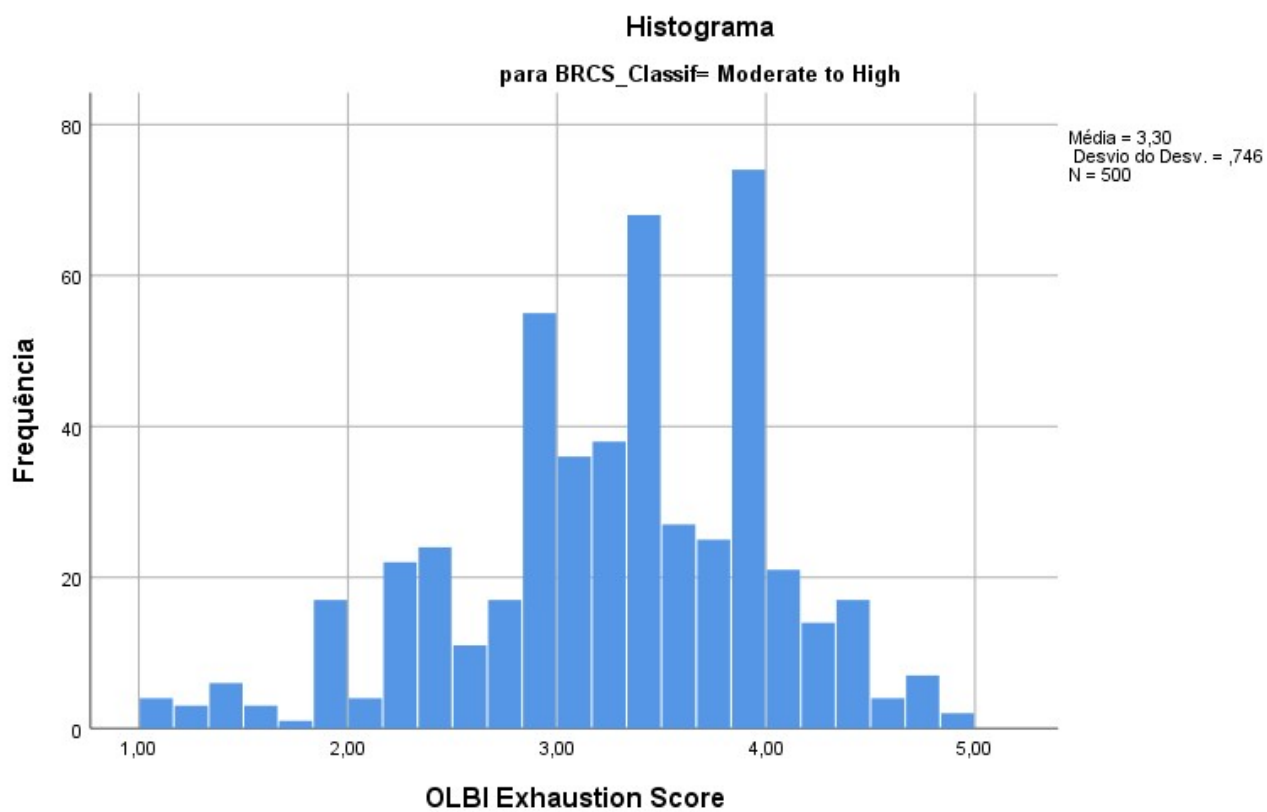

Gráfico Q-Q normais

Gráfico Q-Q Normal de OLBI Exhaustion Score

para BRCS\_Classif= Low resilience

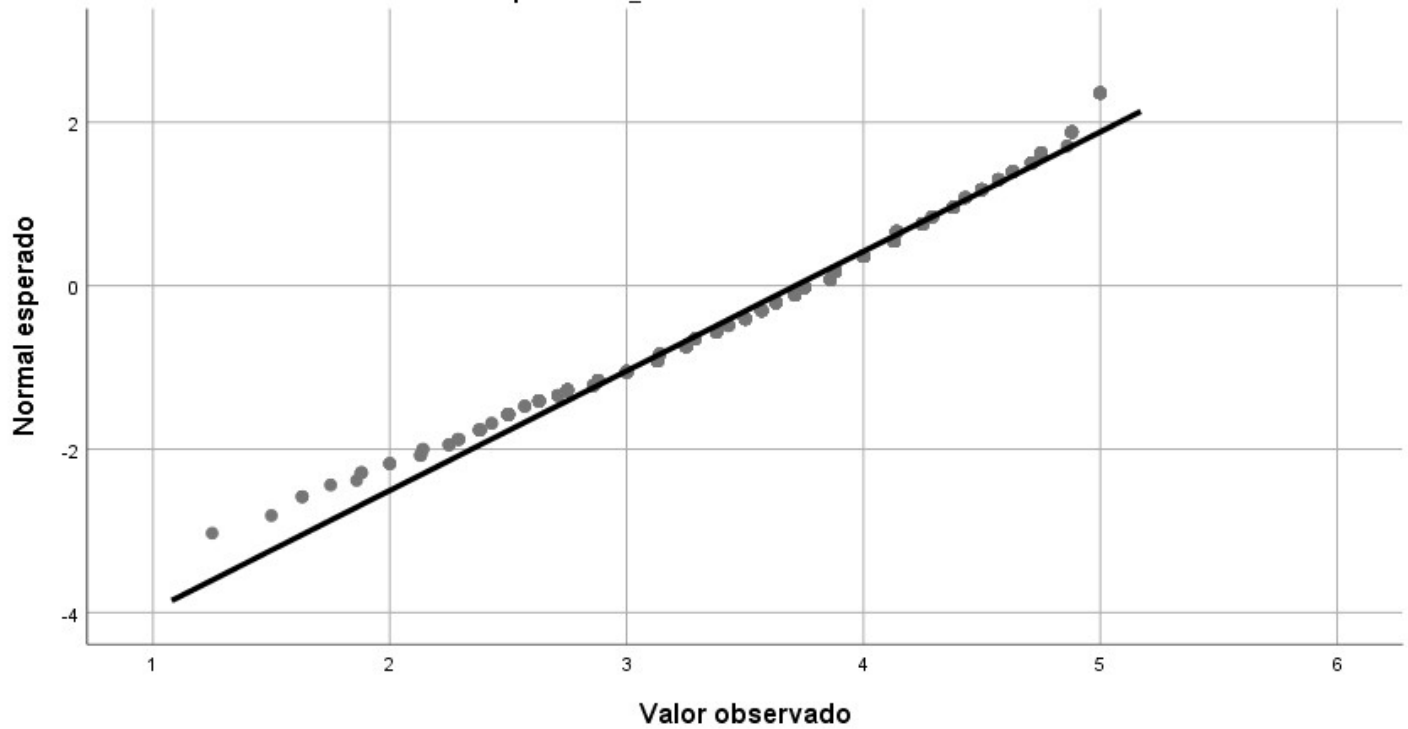

Gráfico Q-Q Normal de OLBI Exhaustion Score

para BRCS\_Classif= Moderate to High

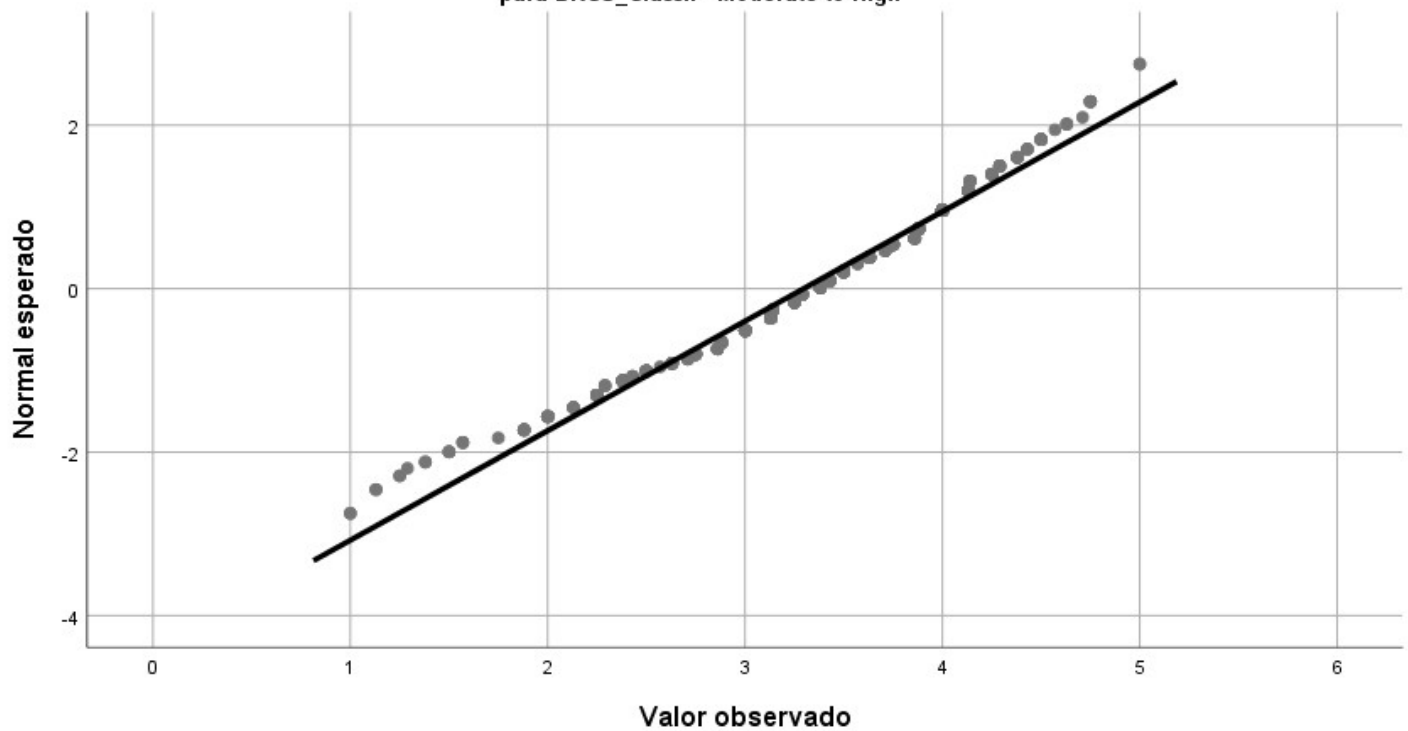

Gráfico Q-Q normais sem tendência

Gráfico Q-Q Normal sem Tendência de OLBI Exhaustion Score

para BRCS\_Classif= Low resilience

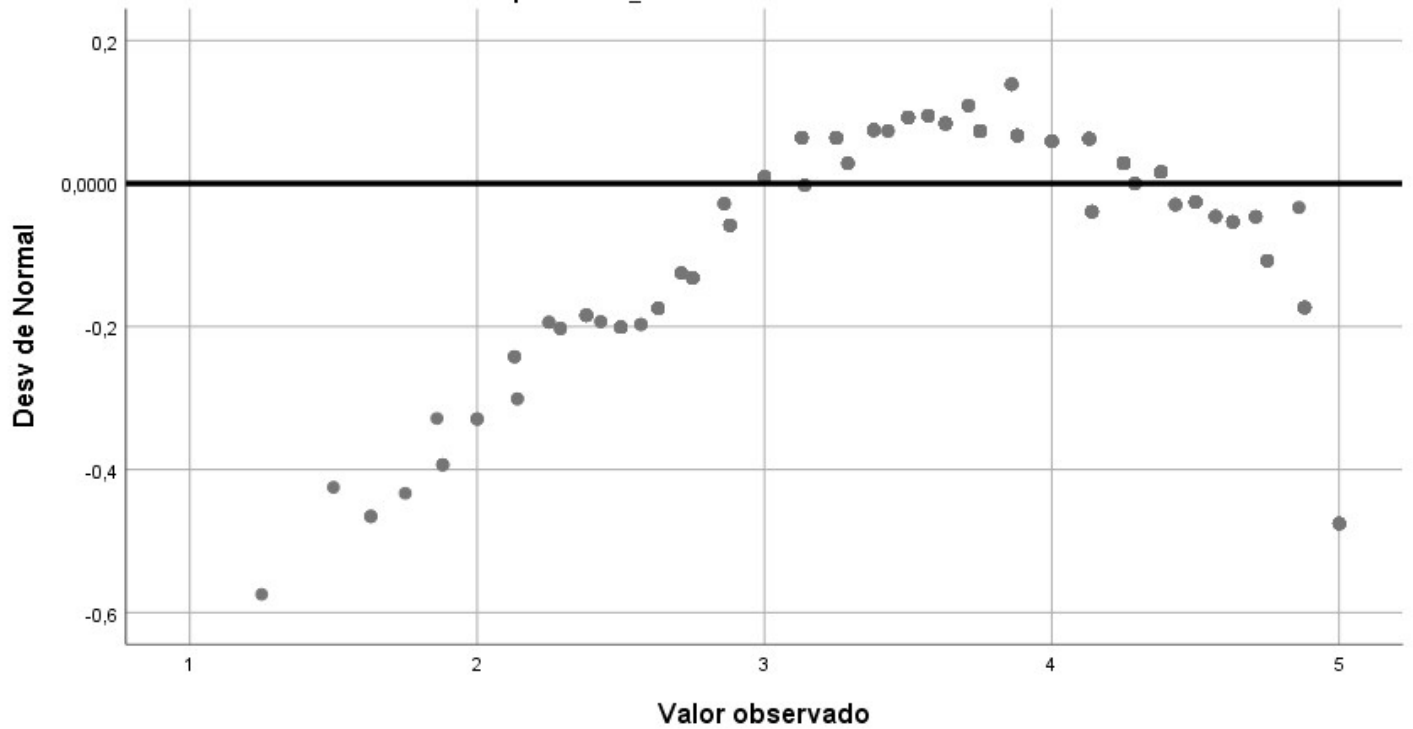

Gráfico Q-Q Normal sem Tendência de OLBI Exhaustion Score

para BRCS\_Classif= Moderate to High

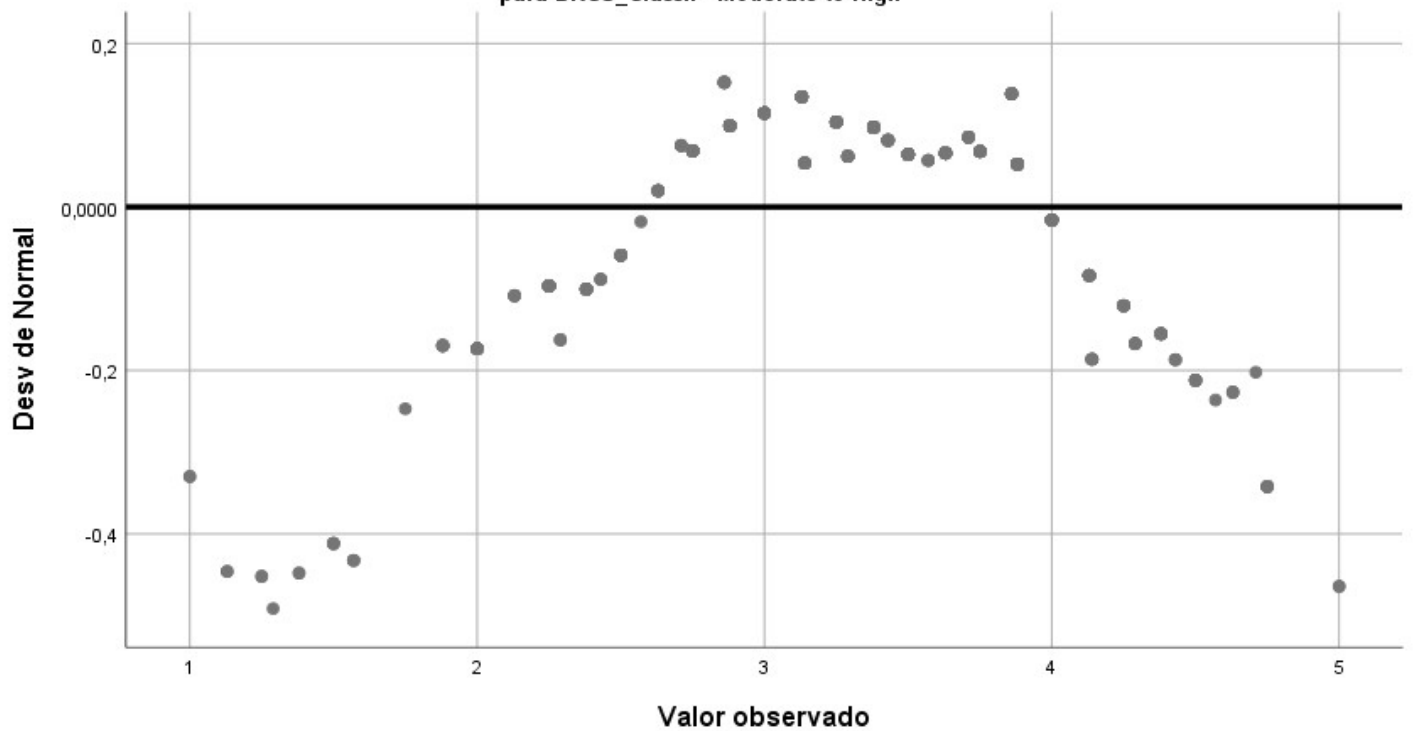

Classification of the percieved autonomy to self-conduct in the residency program

Resumo de processamento do caso

|                          | Classification of the percieved | Casos  |             |        |             |       |             |
|--------------------------|---------------------------------|--------|-------------|--------|-------------|-------|-------------|
|                          | autonomy to self-conduct in the | Válido |             | Omisso |             | Total |             |
|                          | residency program               | N      | Porcentagem | N      | Porcentagem | N     | Porcentagem |
| OLBI Disengagement Score | Low autonomy                    | 224    | 100,0%      | 0      | 0,0%        | 224   | 100,0%      |
|                          | Moderate to high autonomy       | 1089   | 100,0%      | 0      | 0,0%        | 1089  | 100,0%      |
| OLBI Exhaustion Score    | Low autonomy                    | 224    | 100,0%      | 0      | 0,0%        | 224   | 100,0%      |
|                          | Moderate to high autonomy       | 1089   | 100,0%      | 0      | 0,0%        | 1089  | 100,0%      |

Descritivos

|                          | Classification of the percieved autonomy to self-conduct in the residency program | Estatística                                     |        | Erro Erro |
|--------------------------|-----------------------------------------------------------------------------------|-------------------------------------------------|--------|-----------|
| OLBI Disengagement Score | Low autonomy                                                                      | Média                                           | 3,2695 | ,05654    |
|                          |                                                                                   | 95% Intervalo de Confiança para Limite inferior | 3,1581 |           |
|                          |                                                                                   | Média Limite superior                           | 3,3810 |           |
|                          |                                                                                   | 5% da média aparada                             | 3,2837 |           |
|                          |                                                                                   | Mediana                                         | 3,2500 |           |
|                          |                                                                                   | Variância                                       | ,716   |           |
|                          |                                                                                   | Erro Desvio                                     | ,84620 |           |
|                          |                                                                                   | Mínimo                                          | 1,00   |           |
|                          |                                                                                   | Máximo                                          | 5,00   |           |
|                          |                                                                                   | Intervalo                                       | 4,00   |           |
|                          |                                                                                   | Amplitude interquartil                          | 1,13   |           |
|                          |                                                                                   | Assimetria                                      | -,228  | ,163      |
|                          |                                                                                   | Curtose                                         | -,298  | ,324      |
|                          | Moderate to high autonomy                                                         | Média                                           | 2,6721 | ,02428    |
|                          |                                                                                   | 95% Intervalo de Confiança para Limite inferior | 2,6244 |           |
|                          |                                                                                   | Média Limite superior                           | 2,7197 |           |
|                          |                                                                                   | 5% da média aparada                             | 2,6589 |           |
|                          |                                                                                   | Mediana                                         | 2,6250 |           |
|                          |                                                                                   | Variância                                       | ,642   |           |
|                          |                                                                                   | Erro Desvio                                     | ,80132 |           |
|                          |                                                                                   | Mínimo                                          | 1,00   |           |
|                          |                                                                                   | Máximo                                          | 5,00   |           |
|                          |                                                                                   | Intervalo                                       | 4,00   |           |
|                          |                                                                                   | Amplitude interquartil                          | 1,13   |           |
|                          |                                                                                   | Assimetria                                      | ,223   | ,074      |
|                          |                                                                                   | Curtose                                         | -,349  | ,148      |
| OLBI Exhaustion Score    | Low autonomy                                                                      | Média                                           | 3,8774 | ,04612    |
|                          |                                                                                   | 95% Intervalo de Confiança para Limite inferior | 3,7865 |           |
|                          |                                                                                   | Média Limite superior                           | 3,9682 |           |
|                          |                                                                                   | 5% da média aparada                             | 3,9138 |           |
|                          |                                                                                   | Mediana                                         | 4,0000 |           |
|                          |                                                                                   | Variância                                       | ,476   |           |

|                           |                           |                                 |                 |        |        |
|---------------------------|---------------------------|---------------------------------|-----------------|--------|--------|
| Moderate to high autonomy | Moderate to high autonomy | Erro Desvio                     |                 | ,69022 |        |
|                           |                           | Mínimo                          |                 | 1,50   |        |
|                           |                           | Máximo                          |                 | 5,00   |        |
|                           |                           | Intervalo                       |                 | 3,50   |        |
|                           |                           | Amplitude interquartil          |                 | ,88    |        |
|                           |                           | Assimetria                      |                 | -,686  | ,163   |
|                           |                           | Curtose                         |                 | ,631   | ,324   |
|                           |                           | Média                           |                 | 3,4882 | ,02206 |
|                           |                           | 95% Intervalo de Confiança para | Limite inferior | 3,4449 |        |
|                           |                           | Média                           | Limite superior | 3,5315 |        |
|                           |                           | 5% da média aparada             |                 | 3,5118 |        |
|                           |                           | Mediana                         |                 | 3,5700 |        |
|                           |                           | Variância                       |                 | ,530   |        |
|                           |                           | Erro Desvio                     |                 | ,72813 |        |
|                           |                           | Mínimo                          |                 | 1,00   |        |
|                           |                           | Máximo                          |                 | 5,00   |        |
|                           |                           | Intervalo                       |                 | 4,00   |        |
|                           |                           | Amplitude interquartil          |                 | 1,00   |        |
|                           |                           | Assimetria                      |                 | -,524  | ,074   |
|                           |                           | Curtose                         |                 | ,215   | ,148   |

| Percentis                     |                          |                                                                                   |           |        |        |        |        |        |        |
|-------------------------------|--------------------------|-----------------------------------------------------------------------------------|-----------|--------|--------|--------|--------|--------|--------|
|                               |                          | Classification of the percieved autonomy to self-conduct in the residency program | Percentis |        |        |        |        |        |        |
|                               |                          |                                                                                   | 5         | 10     | 25     | 50     | 75     | 90     | 95     |
| Média Ponderada (Definição 1) | OLBI Disengagement Score | Low autonomy                                                                      | 1,6250    | 2,1875 | 2,7500 | 3,2500 | 3,8750 | 4,3750 | 4,6250 |
|                               |                          | Moderate to high autonomy                                                         | 1,3750    | 1,6250 | 2,1250 | 2,6250 | 3,2500 | 3,7500 | 4,0625 |
|                               | OLBI Exhaustion Score    | Low autonomy                                                                      | 2,5325    | 3,0000 | 3,5000 | 4,0000 | 4,3800 | 4,7500 | 4,8800 |
|                               |                          | Moderate to high autonomy                                                         | 2,2500    | 2,5000 | 3,0000 | 3,5700 | 4,0000 | 4,3800 | 4,5700 |
| Teste de Tukey                | OLBI Disengagement Score | Low autonomy                                                                      |           |        | 2,7500 | 3,2500 | 3,8750 |        |        |
|                               |                          | Moderate to high autonomy                                                         |           |        | 2,1250 | 2,6250 | 3,2500 |        |        |
|                               | OLBI Exhaustion Score    | Low autonomy                                                                      |           |        | 3,5000 | 4,0000 | 4,3800 |        |        |
|                               |                          | Moderate to high autonomy                                                         |           |        | 3,0000 | 3,5700 | 4,0000 |        |        |

| Testes de Normalidade    |                                                                                   |                                 |      |       |              |      |      |
|--------------------------|-----------------------------------------------------------------------------------|---------------------------------|------|-------|--------------|------|------|
|                          | Classification of the percieved autonomy to self-conduct in the residency program | Kolmogorov-Smirnov <sup>a</sup> |      |       | Shapiro-Wilk |      |      |
|                          |                                                                                   | Estatística                     | df   | Sig.  | Estatística  | df   | Sig. |
| OLBI Disengagement Score | Low autonomy                                                                      | ,047                            | 224  | ,200* | ,989         | 224  | ,087 |
|                          | Moderate to high autonomy                                                         | ,059                            | 1089 | ,000  | ,990         | 1089 | ,000 |
| OLBI Exhaustion Score    | Low autonomy                                                                      | ,088                            | 224  | ,000  | ,963         | 224  | ,000 |
|                          | Moderate to high autonomy                                                         | ,069                            | 1089 | ,000  | ,980         | 1089 | ,000 |

\*. Este é um limite inferior da significância verdadeira.

OLBI Disengagement Score

Histogramas

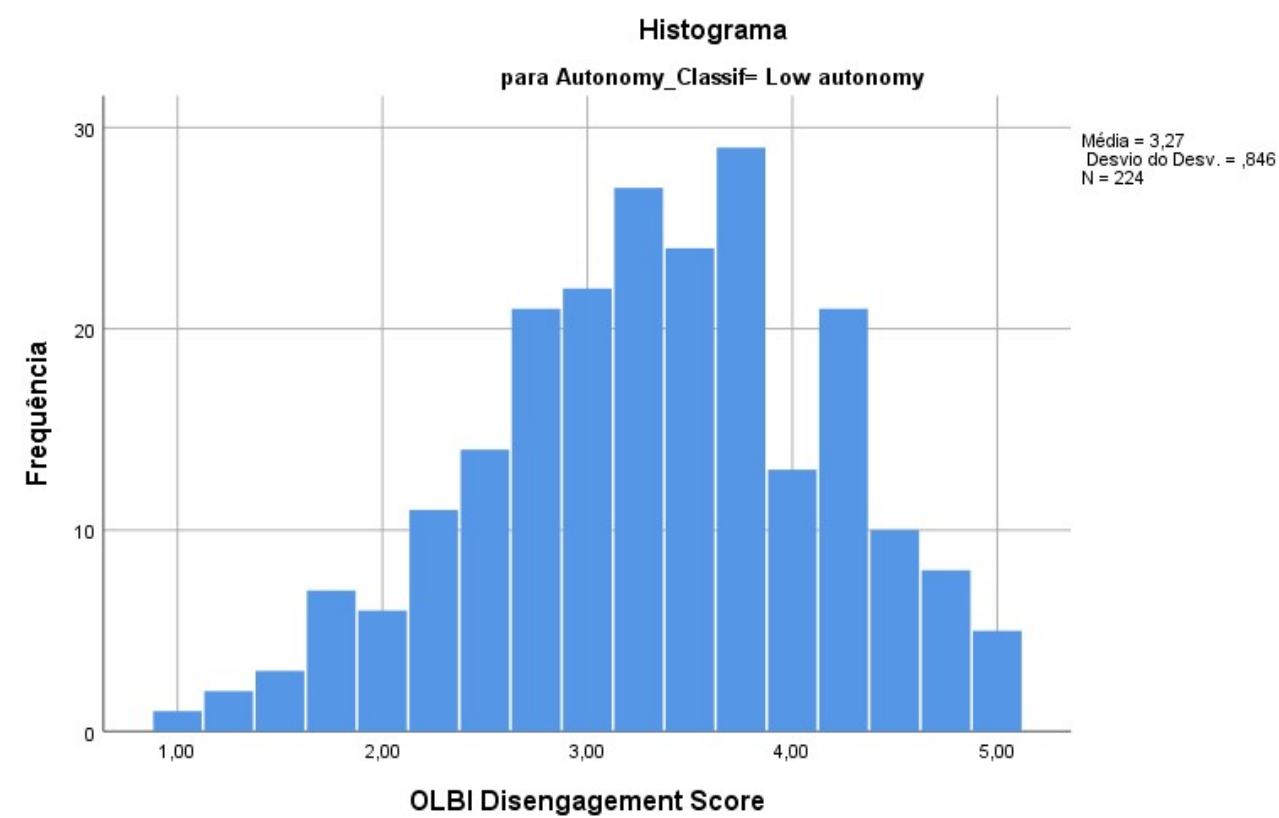

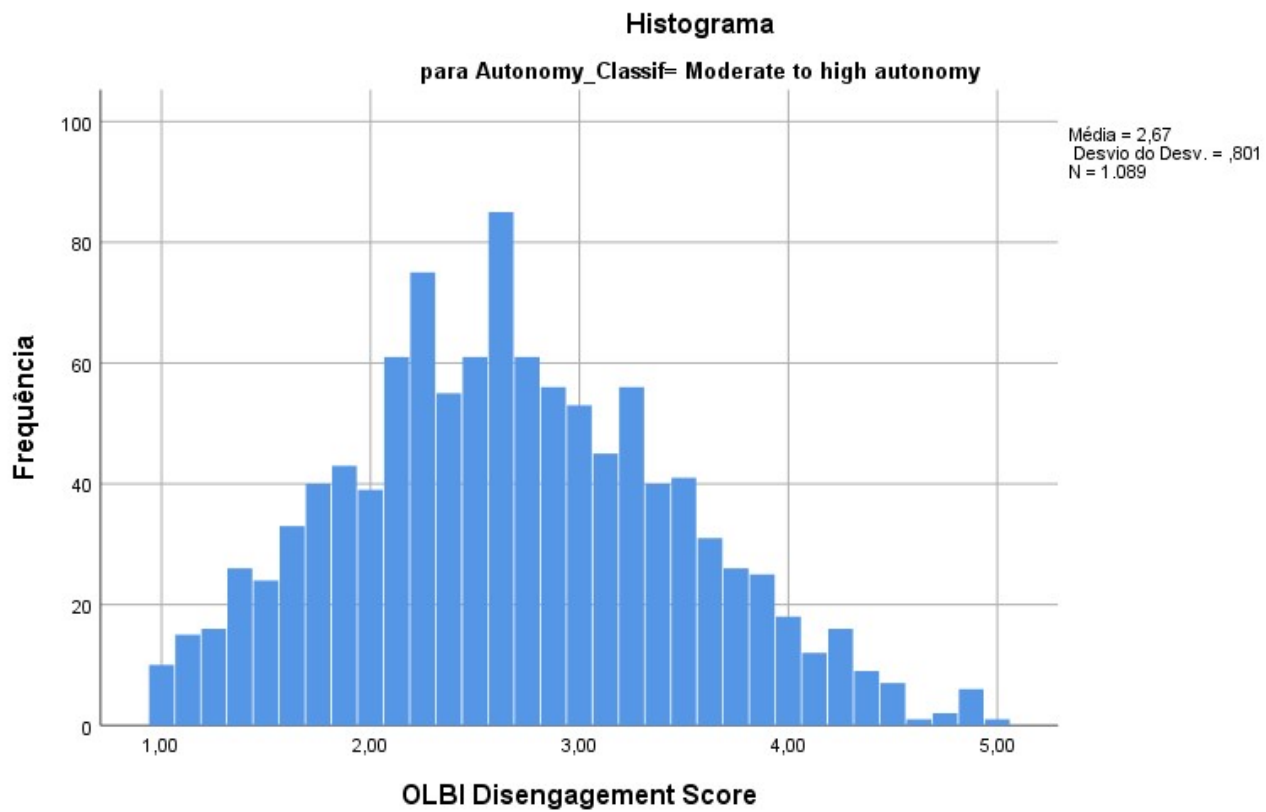

Gráfico Q-Q normais

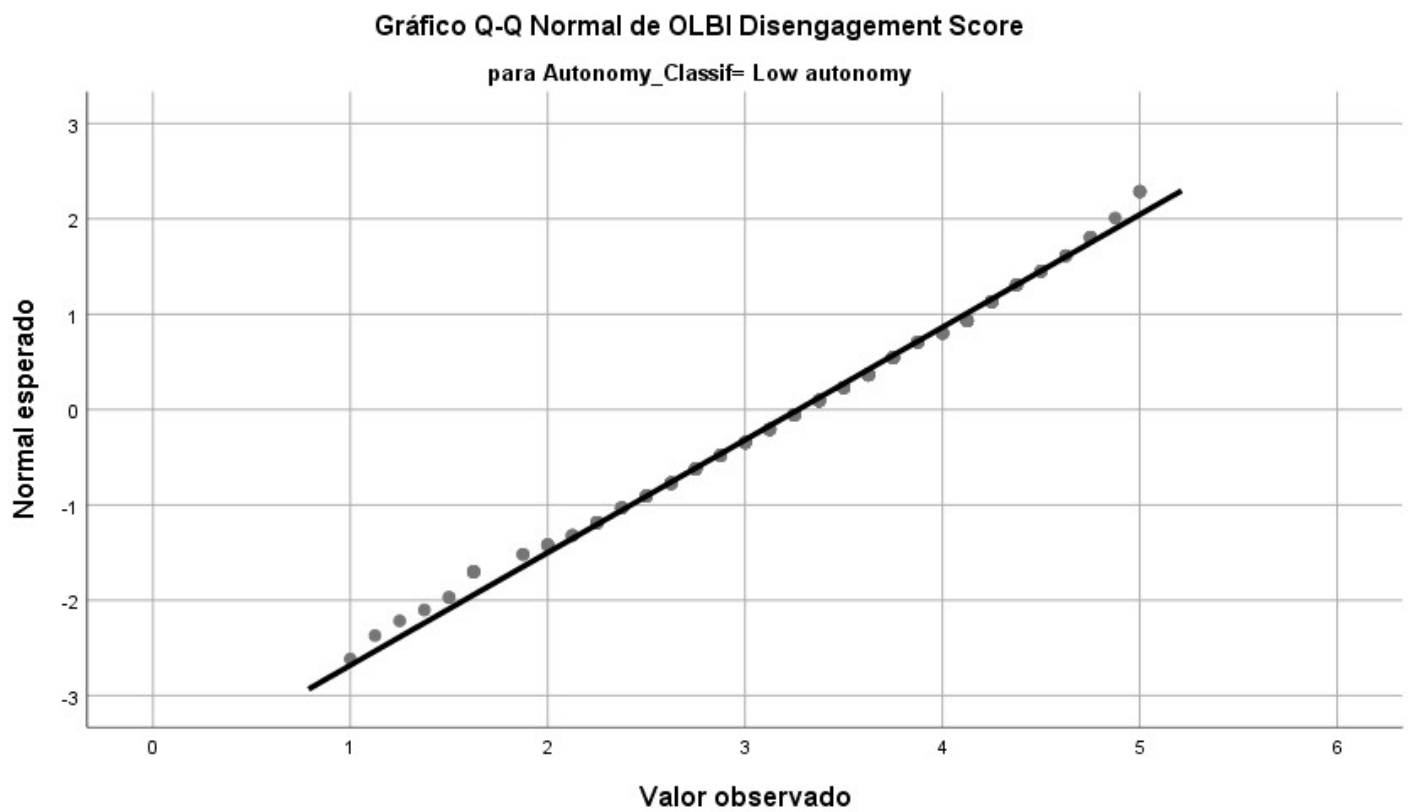

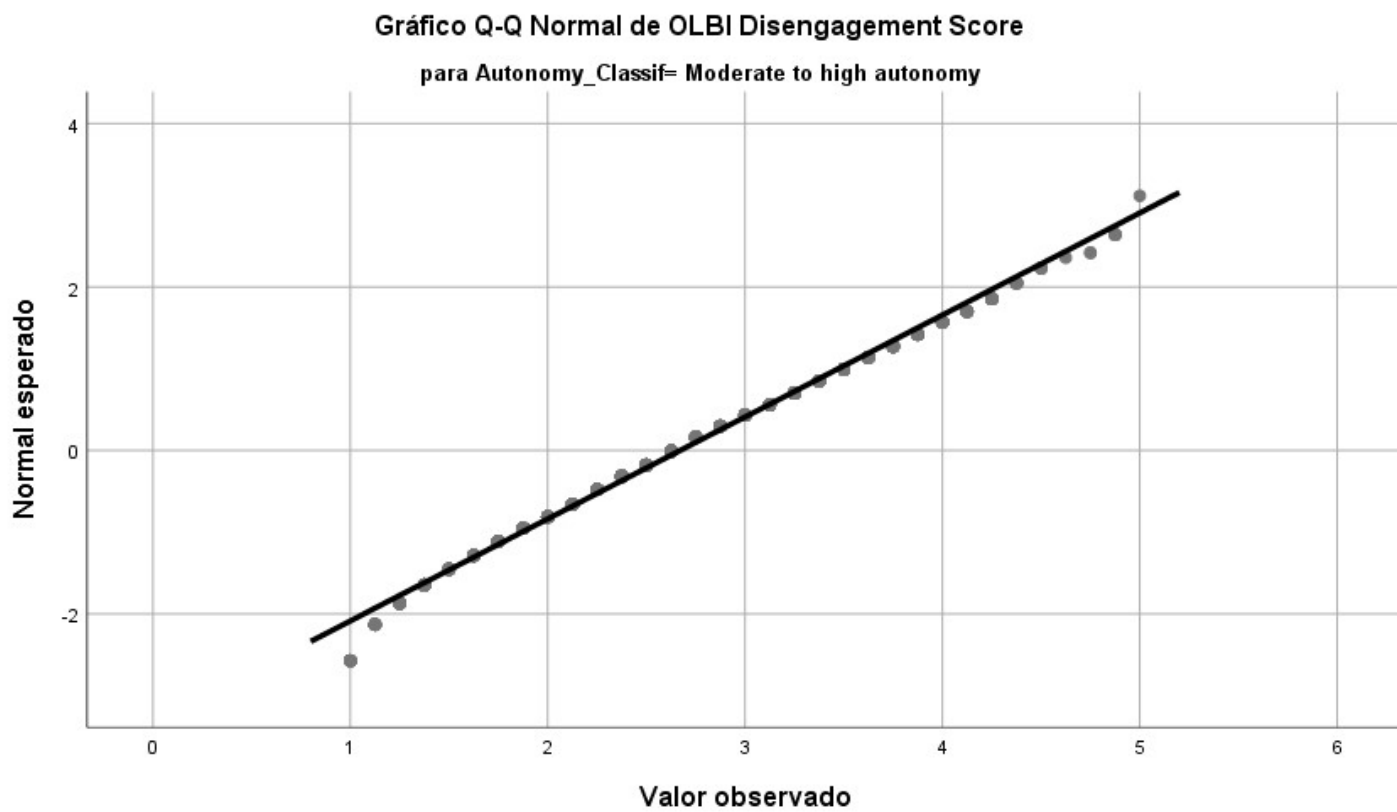

Gráfico Q-Q normais sem tendência

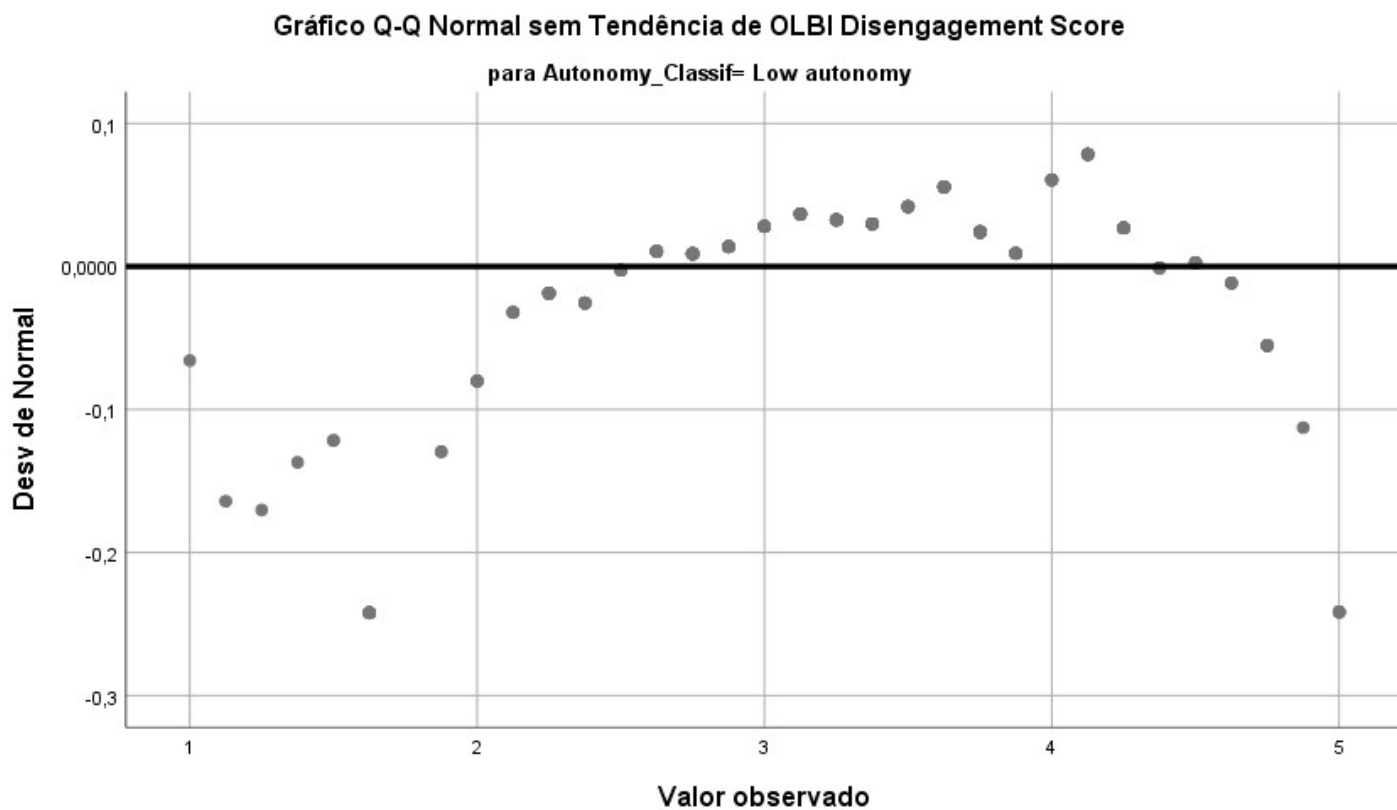

Gráfico Q-Q Normal sem Tendência de OLBI Disengagement Score  
para Autonomy\_Classif= Moderate to high autonomy

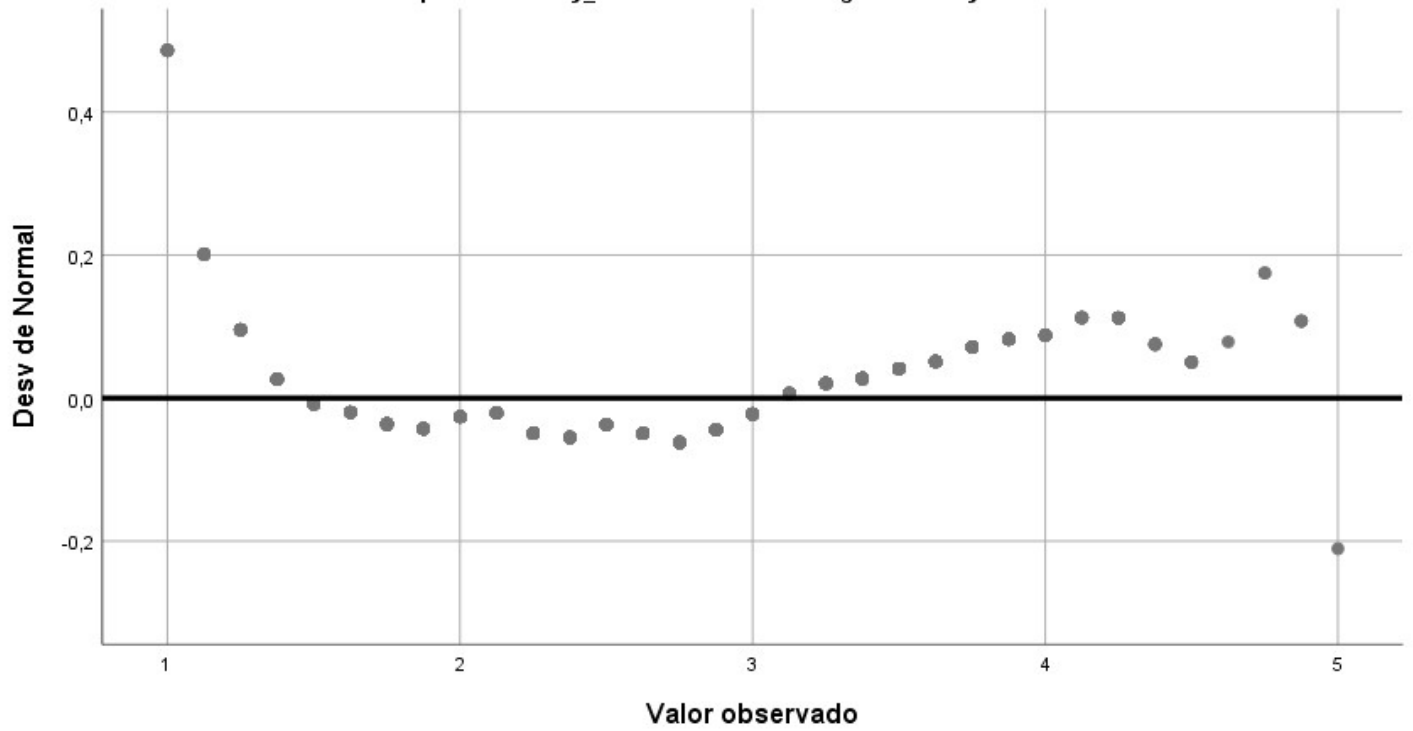

OLBI Exhaustion Score

Histogramas

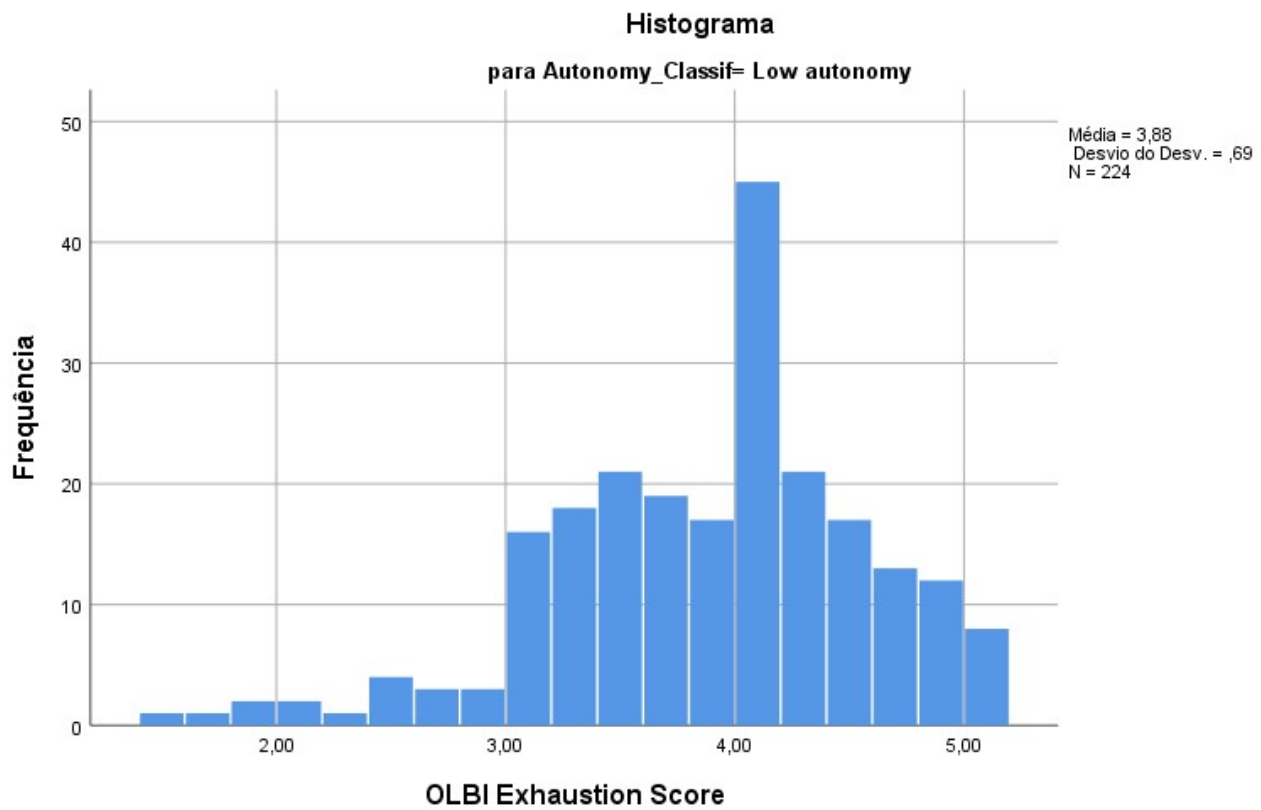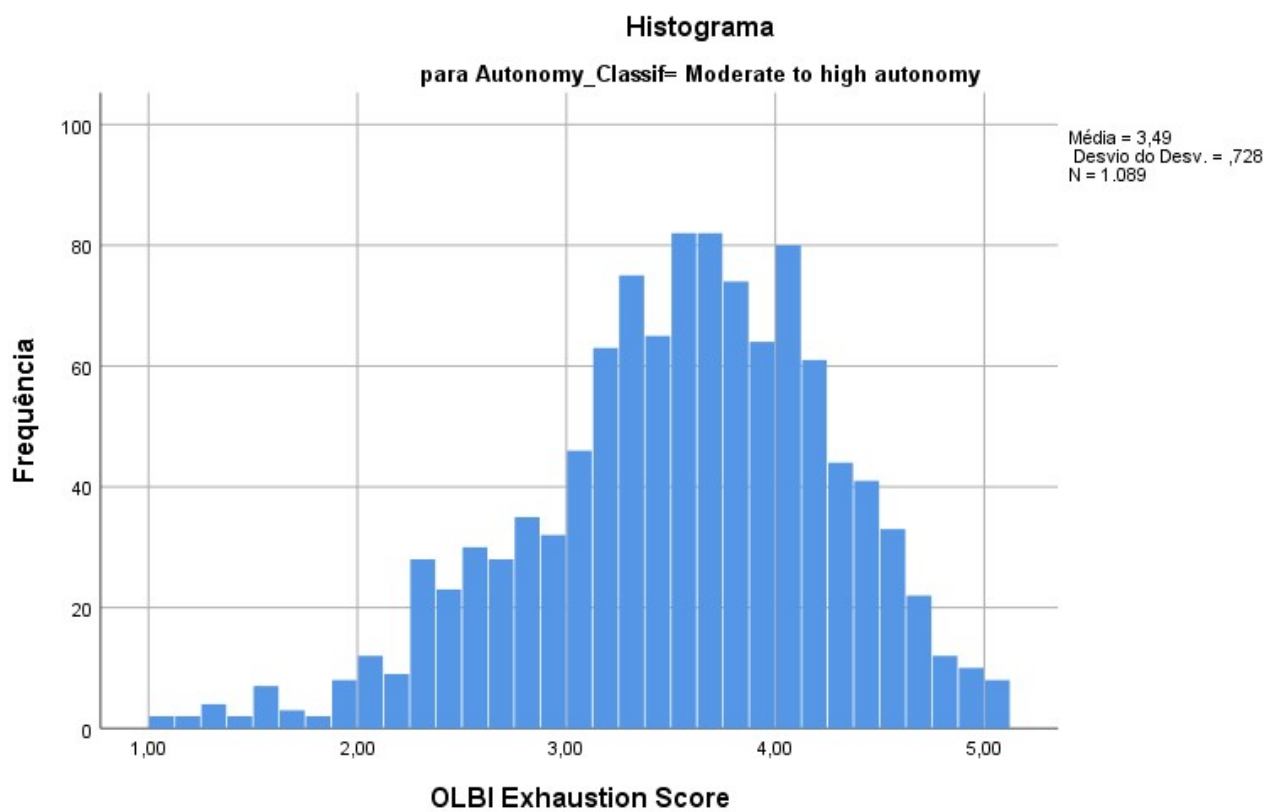

Gráfico Q-Q normais

Gráfico Q-Q Normal de OLBI Exhaustion Score

para Autonomy\_Classif= Low autonomy

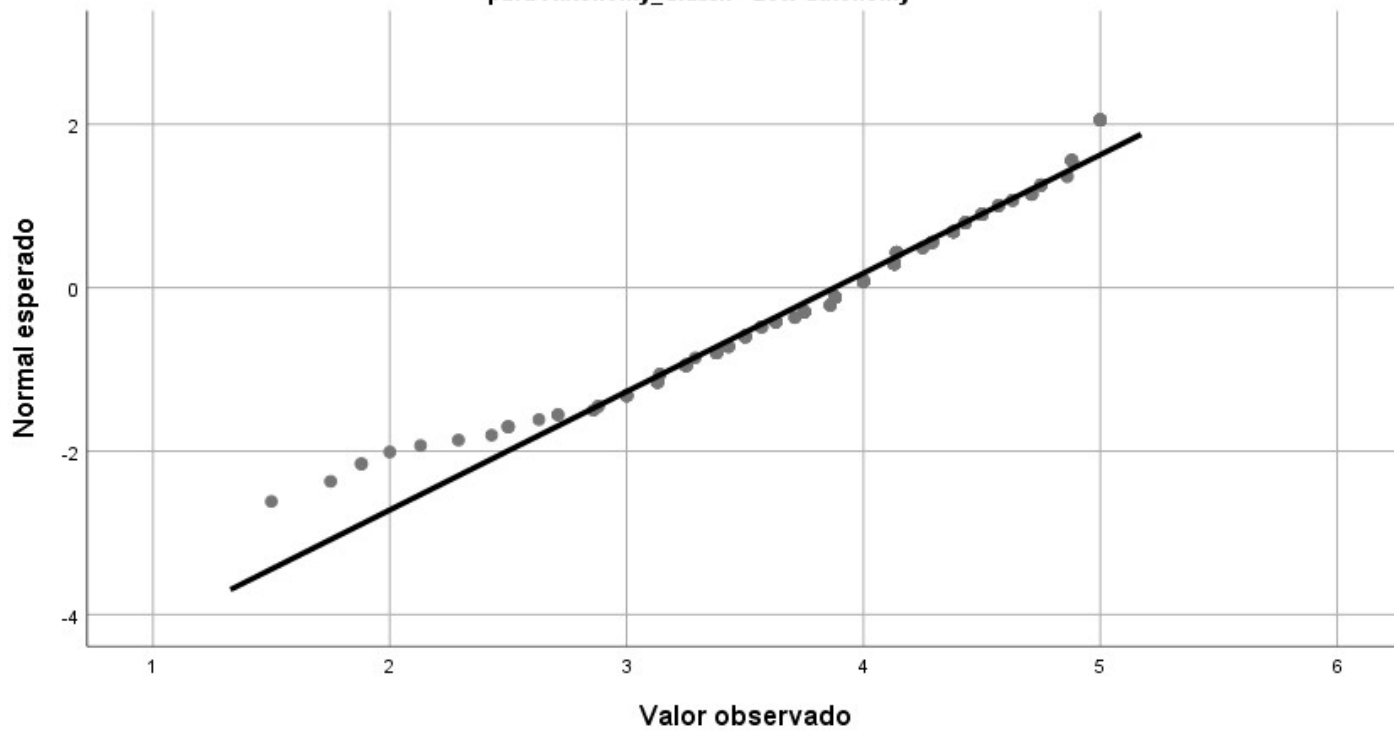

Gráfico Q-Q Normal de OLBI Exhaustion Score

para Autonomy\_Classif= Moderate to high autonomy

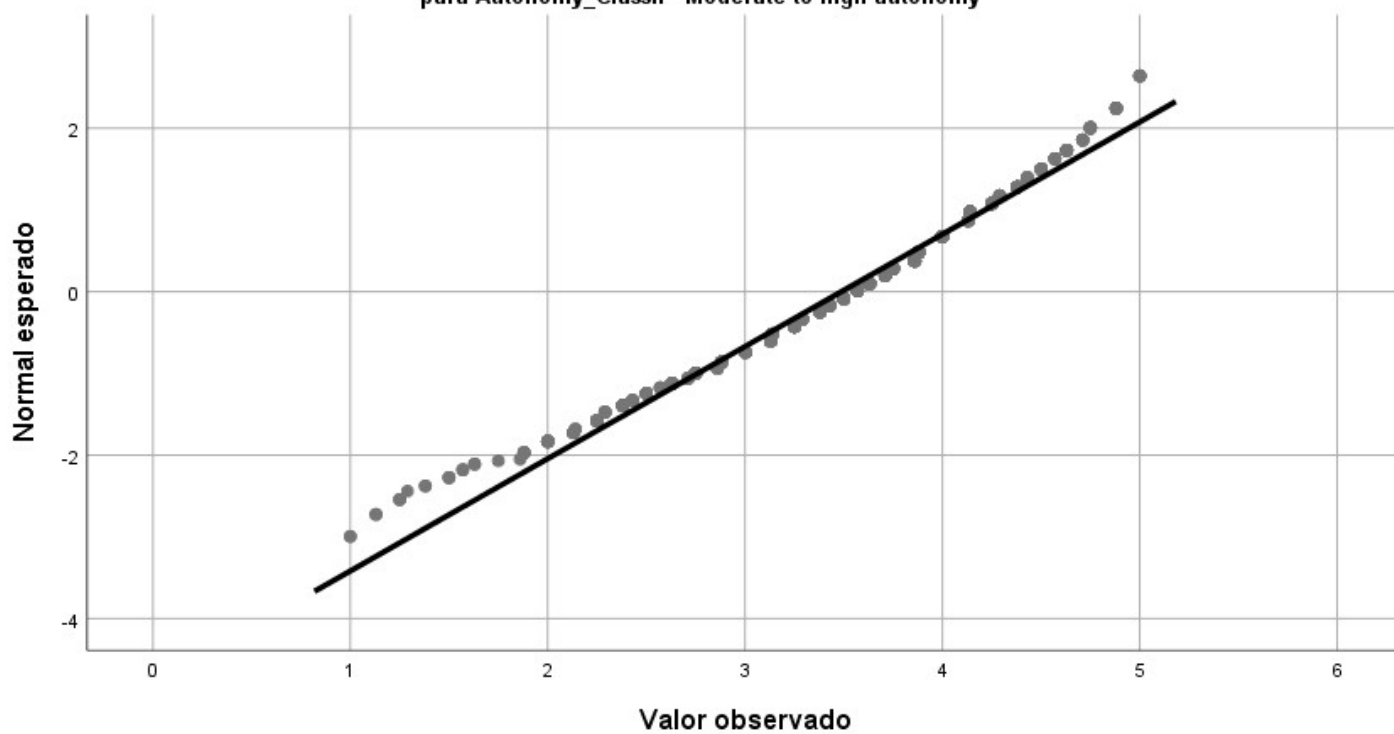

Gráfico Q-Q normais sem tendência

Gráfico Q-Q Normal sem Tendência de OLBI Exhaustion Score

para Autonomy\_Classif= Low autonomy

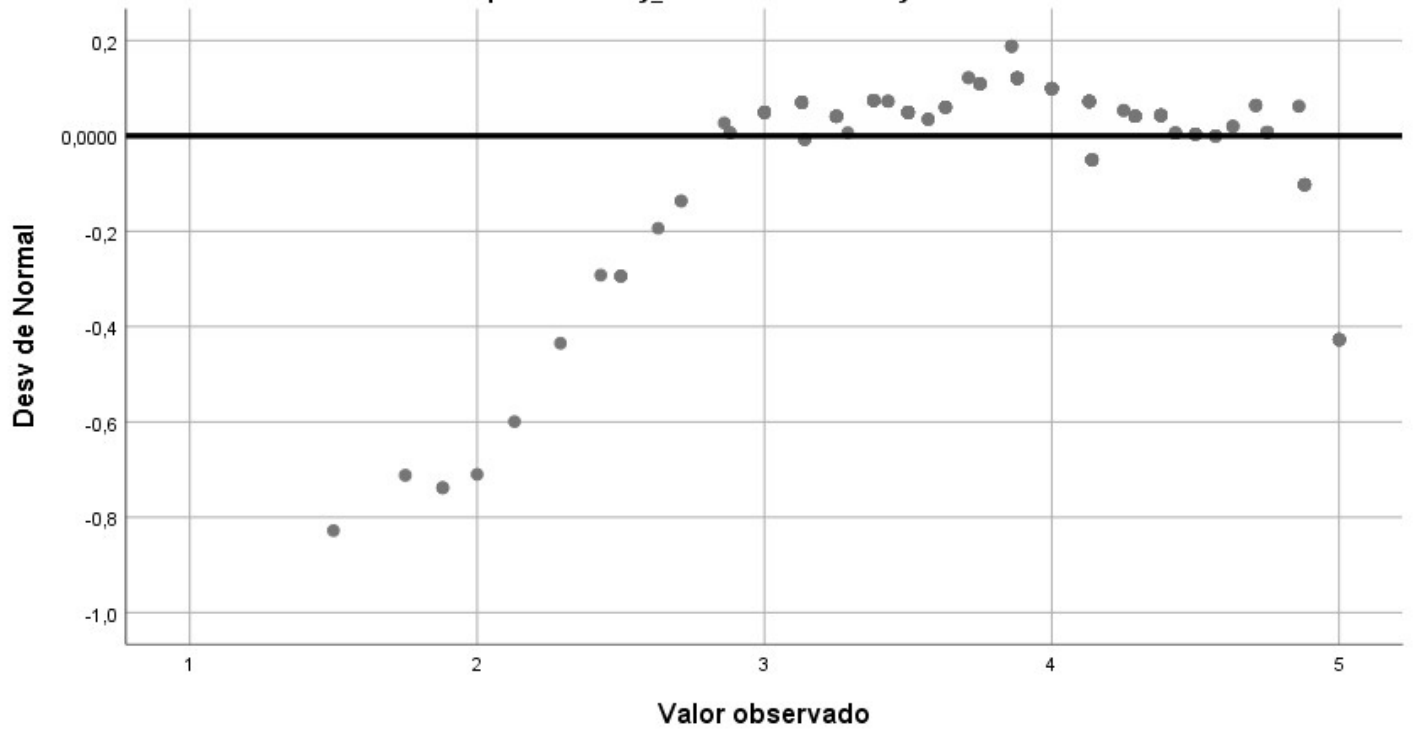

Gráfico Q-Q Normal sem Tendência de OLBI Exhaustion Score

para Autonomy\_Classif= Moderate to high autonomy

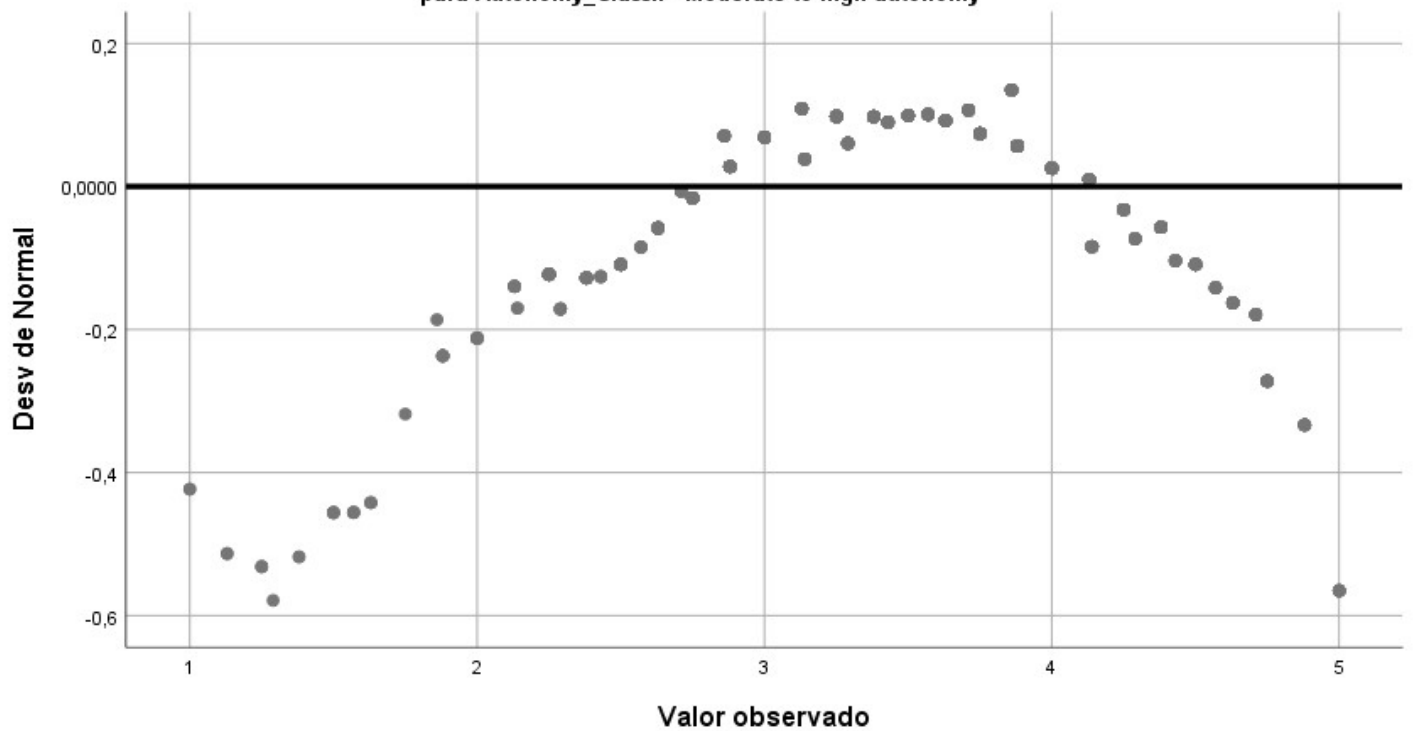

Percieved adequacy of the pedagogic structure and availability of resouces in the residency program

## Resumo de processamento do caso

|                          | Percieved adequacy of the pedagogic structure and availability of resouces in the residency program | Casos  |             |        |             |       |             |
|--------------------------|-----------------------------------------------------------------------------------------------------|--------|-------------|--------|-------------|-------|-------------|
|                          |                                                                                                     | Válido |             | Omisso |             | Total |             |
|                          |                                                                                                     | N      | Porcentagem | N      | Porcentagem | N     | Porcentagem |
| OLBI Disengagement Score | Poor adequacy                                                                                       | 558    | 100,0%      | 0      | 0,0%        | 558   | 100,0%      |
|                          | Moderate to good adequacy                                                                           | 755    | 100,0%      | 0      | 0,0%        | 755   | 100,0%      |
| OLBI Exhaustion Score    | Poor adequacy                                                                                       | 558    | 100,0%      | 0      | 0,0%        | 558   | 100,0%      |
|                          | Moderate to good adequacy                                                                           | 755    | 100,0%      | 0      | 0,0%        | 755   | 100,0%      |

## Descritivos

| Percieved adequacy of the pedagogic structure and availability of resouces in the residency program |                           | Estatística                                     |        | Erro Erro |
|-----------------------------------------------------------------------------------------------------|---------------------------|-------------------------------------------------|--------|-----------|
| OLBI Disengagement Score                                                                            | Poor adequacy             | Média                                           | 3,1254 | ,03341    |
|                                                                                                     |                           | 95% Intervalo de Confiança para Limite inferior | 3,0598 |           |
|                                                                                                     |                           | Média Limite superior                           | 3,1911 |           |
|                                                                                                     |                           | 5% da média aparada                             | 3,1250 |           |
|                                                                                                     |                           | Mediana                                         | 3,1250 |           |
|                                                                                                     |                           | Variância                                       | ,623   |           |
|                                                                                                     |                           | Erro Desvio                                     | ,78926 |           |
|                                                                                                     |                           | Mínimo                                          | 1,13   |           |
|                                                                                                     |                           | Máximo                                          | 5,00   |           |
|                                                                                                     |                           | Intervalo                                       | 3,88   |           |
|                                                                                                     |                           | Amplitude interquartil                          | 1,00   |           |
|                                                                                                     |                           | Assimetria                                      | -,028  | ,103      |
|                                                                                                     |                           | Curtose                                         | -,263  | ,206      |
|                                                                                                     | Moderate to good adequacy | Média                                           | 2,5142 | ,02836    |
|                                                                                                     |                           | 95% Intervalo de Confiança para Limite inferior | 2,4586 |           |
|                                                                                                     |                           | Média Limite superior                           | 2,5699 |           |
|                                                                                                     |                           | 5% da média aparada                             | 2,4931 |           |
|                                                                                                     |                           | Mediana                                         | 2,5000 |           |
|                                                                                                     |                           | Variância                                       | ,607   |           |
|                                                                                                     |                           | Erro Desvio                                     | ,77919 |           |
|                                                                                                     |                           | Mínimo                                          | 1,00   |           |
|                                                                                                     |                           | Máximo                                          | 4,88   |           |
|                                                                                                     |                           | Intervalo                                       | 3,88   |           |
|                                                                                                     |                           | Amplitude interquartil                          | 1,00   |           |
|                                                                                                     |                           | Assimetria                                      | ,370   | ,089      |
|                                                                                                     |                           | Curtose                                         | -,193  | ,178      |
| OLBI Exhaustion Score                                                                               | Poor adequacy             | Média                                           | 3,8236 | ,02794    |
|                                                                                                     |                           | 95% Intervalo de Confiança para Limite inferior | 3,7687 |           |
|                                                                                                     |                           | Média Limite superior                           | 3,8784 |           |
|                                                                                                     |                           | 5% da média aparada                             | 3,8512 |           |
|                                                                                                     |                           | Mediana                                         | 3,8800 |           |

|                           |                           |                                 |                 |        |        |
|---------------------------|---------------------------|---------------------------------|-----------------|--------|--------|
| Moderate to good adequacy | Moderate to good adequacy | Variância                       |                 | ,435   |        |
|                           |                           | Erro Desvio                     |                 | ,65989 |        |
|                           |                           | Mínimo                          |                 | 1,57   |        |
|                           |                           | Máximo                          |                 | 5,00   |        |
|                           |                           | Intervalo                       |                 | 3,43   |        |
|                           |                           | Amplitude interquartil          |                 | ,86    |        |
|                           |                           | Assimetria                      |                 | -,565  | ,103   |
|                           |                           | Curtose                         |                 | ,292   | ,206   |
|                           |                           | Média                           |                 | 3,3558 | ,02646 |
|                           |                           | 95% Intervalo de Confiança para | Limite inferior | 3,3039 |        |
|                           |                           | Média                           | Limite superior | 3,4078 |        |
|                           |                           | 5% da média aparada             |                 | 3,3799 |        |
|                           |                           | Mediana                         |                 | 3,3800 |        |
|                           |                           | Variância                       |                 | ,528   |        |
|                           |                           | Erro Desvio                     |                 | ,72694 |        |
|                           |                           | Mínimo                          |                 | 1,00   |        |
|                           |                           | Máximo                          |                 | 5,00   |        |
|                           |                           | Intervalo                       |                 | 4,00   |        |
|                           |                           | Amplitude interquartil          |                 | 1,00   |        |
|                           |                           | Assimetria                      |                 | -,511  | ,089   |
|                           |                           | Curtose                         |                 | ,193   | ,178   |

| Percentis                     |                          |                                                                                                              |           |        |        |        |        |        |        |
|-------------------------------|--------------------------|--------------------------------------------------------------------------------------------------------------|-----------|--------|--------|--------|--------|--------|--------|
|                               |                          | Percieved adequacy of the<br>pedagogic structure and<br>availability of resouces in the<br>residency program | Percentis |        |        |        |        |        |        |
|                               |                          |                                                                                                              | 5         | 10     | 25     | 50     | 75     | 90     | 95     |
| Média Ponderada (Definição 1) | OLBI Disengagement Score | Poor adequacy                                                                                                | 1,7500    | 2,1125 | 2,6250 | 3,1250 | 3,6250 | 4,1250 | 4,5000 |
|                               |                          | Moderate to good adequacy                                                                                    | 1,2500    | 1,5000 | 2,0000 | 2,5000 | 3,0000 | 3,6250 | 4,0000 |
|                               | OLBI Exhaustion Score    | Poor adequacy                                                                                                | 2,5665    | 3,0000 | 3,4300 | 3,8800 | 4,2900 | 4,7100 | 4,8800 |
|                               |                          | Moderate to good adequacy                                                                                    | 2,0000    | 2,3800 | 2,8800 | 3,3800 | 3,8800 | 4,2500 | 4,3900 |
| Teste de Tukey                | OLBI Disengagement Score | Poor adequacy                                                                                                |           |        | 2,6250 | 3,1250 | 3,6250 |        |        |
|                               |                          | Moderate to good adequacy                                                                                    |           |        | 2,0000 | 2,5000 | 3,0000 |        |        |
|                               | OLBI Exhaustion Score    | Poor adequacy                                                                                                |           |        | 3,4300 | 3,8800 | 4,2900 |        |        |
|                               |                          | Moderate to good adequacy                                                                                    |           |        | 2,8800 | 3,3800 | 3,8800 |        |        |

| Testes de Normalidade    |                                                                                                              |                                 |     |      |              |     |      |
|--------------------------|--------------------------------------------------------------------------------------------------------------|---------------------------------|-----|------|--------------|-----|------|
|                          | Percieved adequacy of the<br>pedagogic structure and availability<br>of resouces in the residency<br>program | Kolmogorov-Smirnov <sup>a</sup> |     |      | Shapiro-Wilk |     |      |
|                          |                                                                                                              |                                 |     |      |              |     |      |
|                          |                                                                                                              | Estatística                     | df  | Sig. | Estatística  | df  | Sig. |
|                          |                                                                                                              |                                 |     |      |              |     |      |
| OLBI Disengagement Score | Poor adequacy                                                                                                | ,041                            | 558 | ,024 | ,994         | 558 | ,019 |
|                          | Moderate to good adequacy                                                                                    | ,069                            | 755 | ,000 | ,984         | 755 | ,000 |

|                       |                           |      |     |      |      |     |      |
|-----------------------|---------------------------|------|-----|------|------|-----|------|
| OLBI Exhaustion Score | Poor adequacy             | ,073 | 558 | ,000 | ,974 | 558 | ,000 |
|                       | Moderate to good adequacy | ,070 | 755 | ,000 | ,981 | 755 | ,000 |

a. Correlação de Significância de Lilliefors

OLBI Disengagement Score

Histogramas

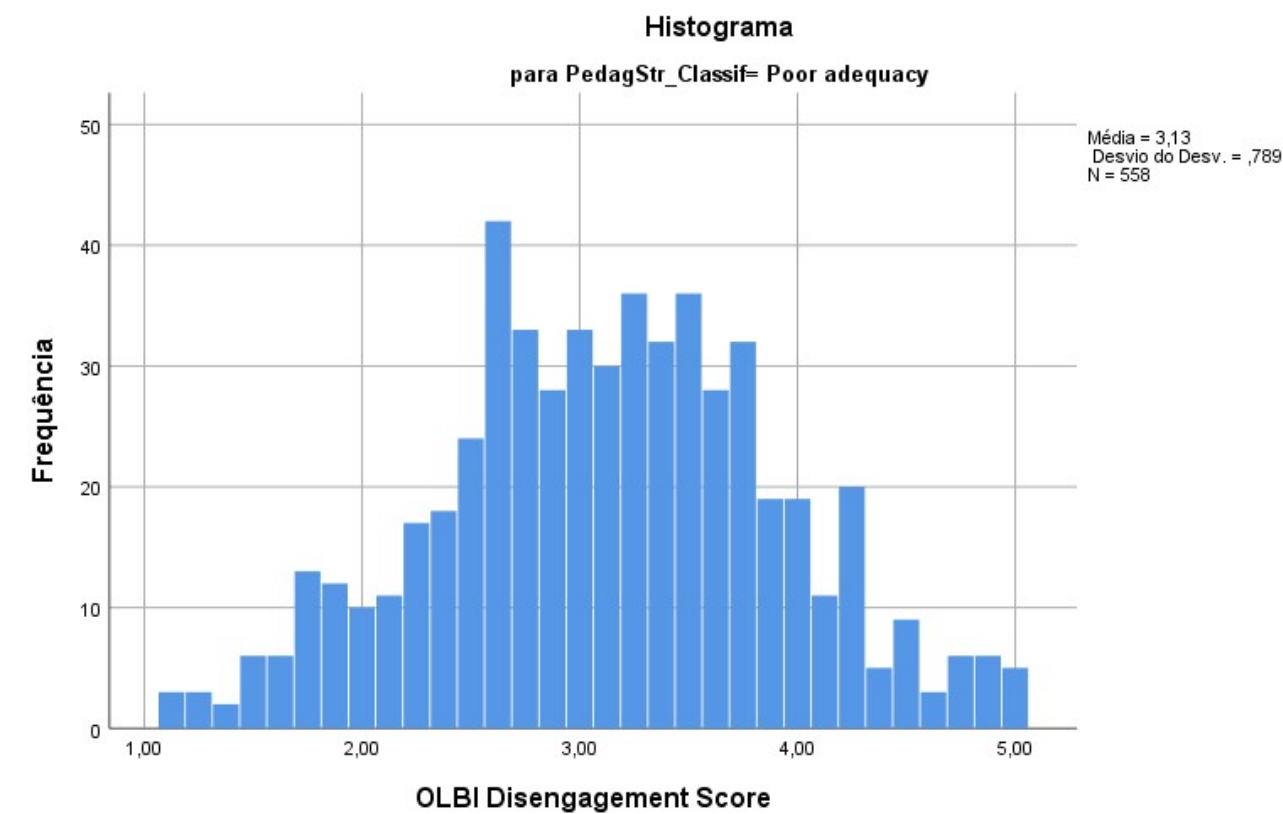

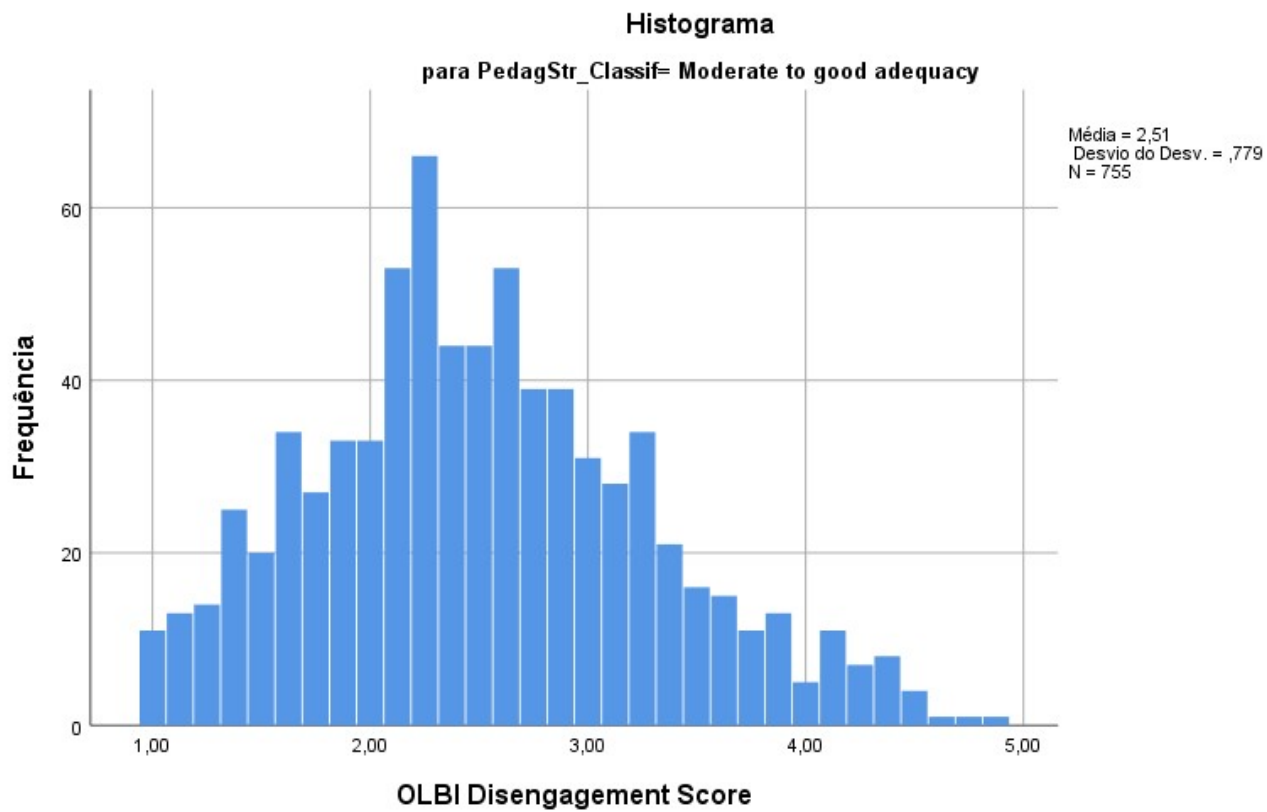

Gráfico Q-Q normais

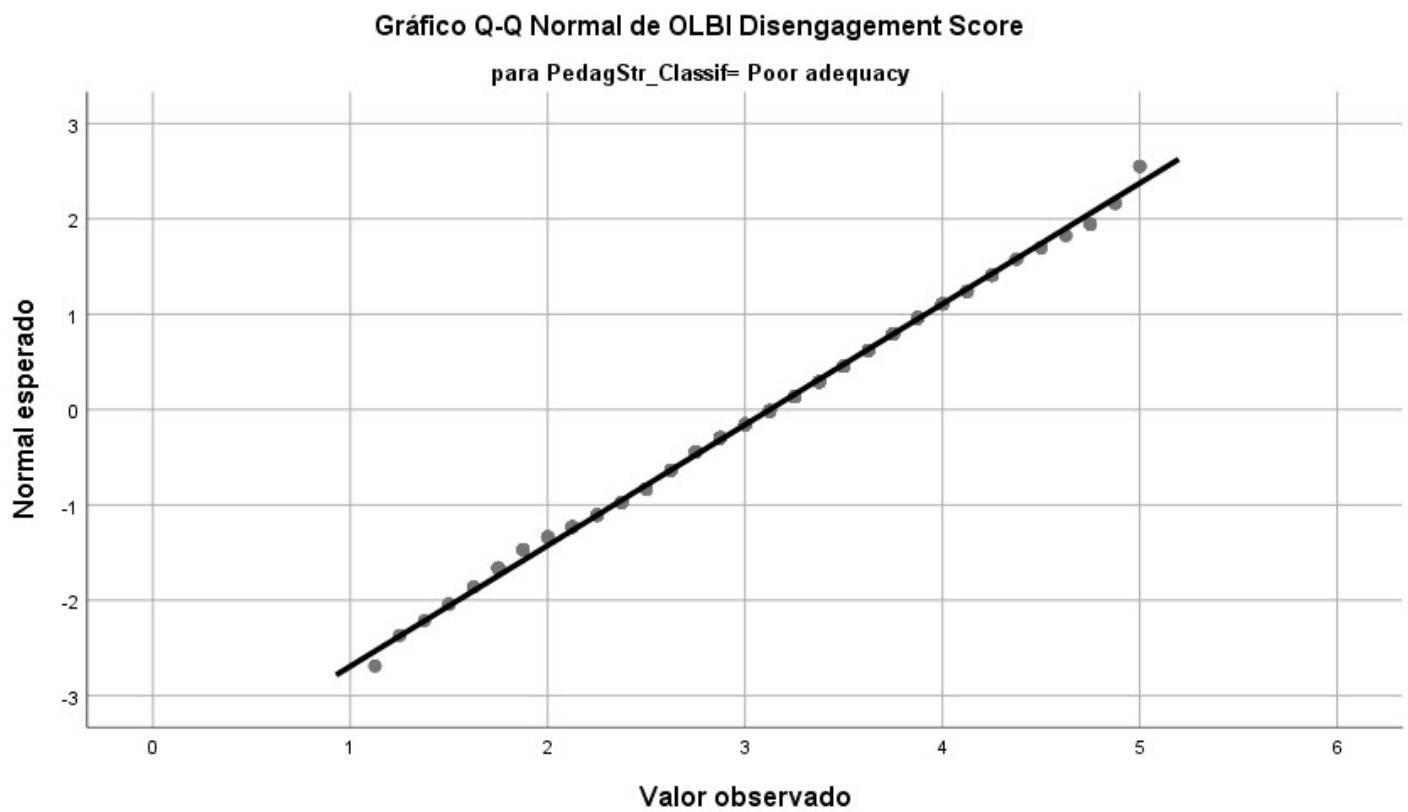

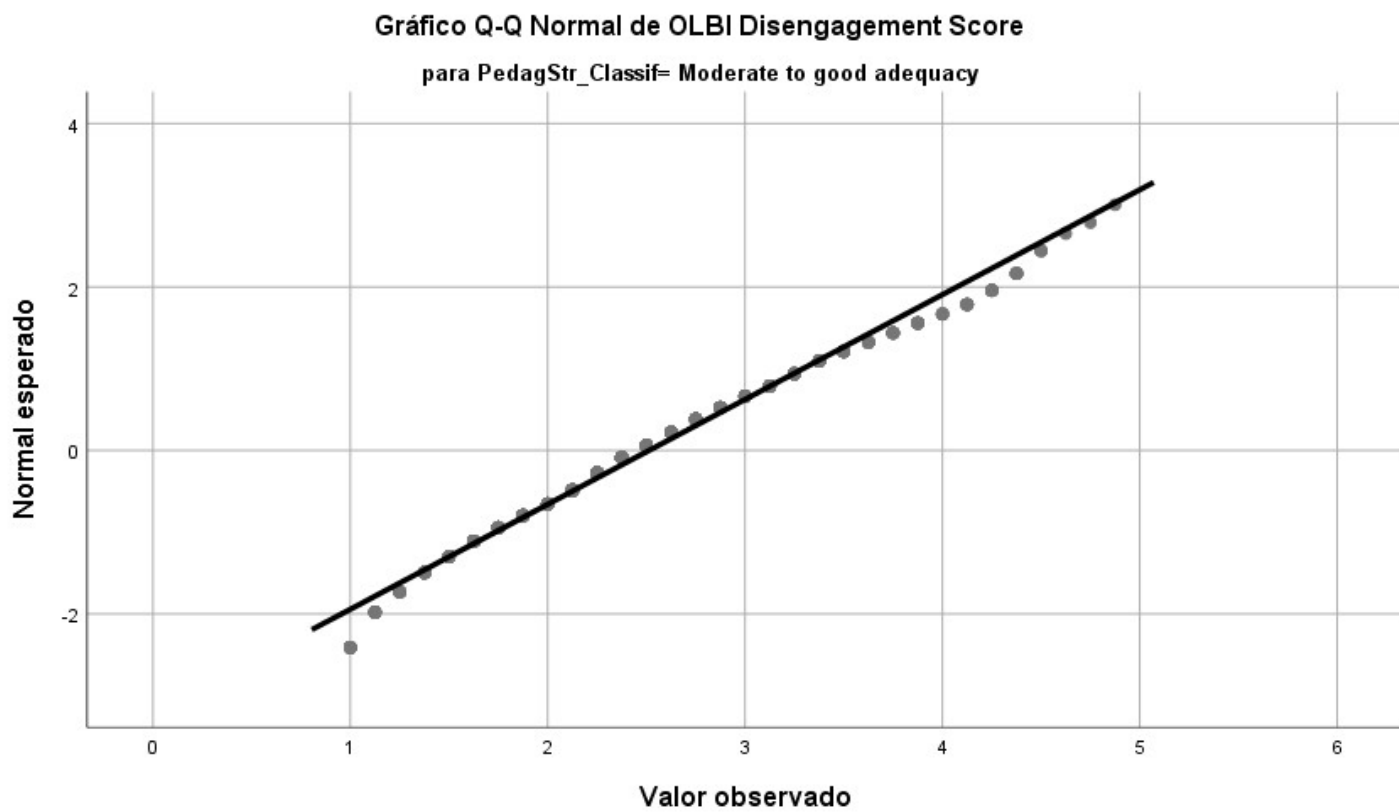

Gráfico Q-Q normais sem tendência

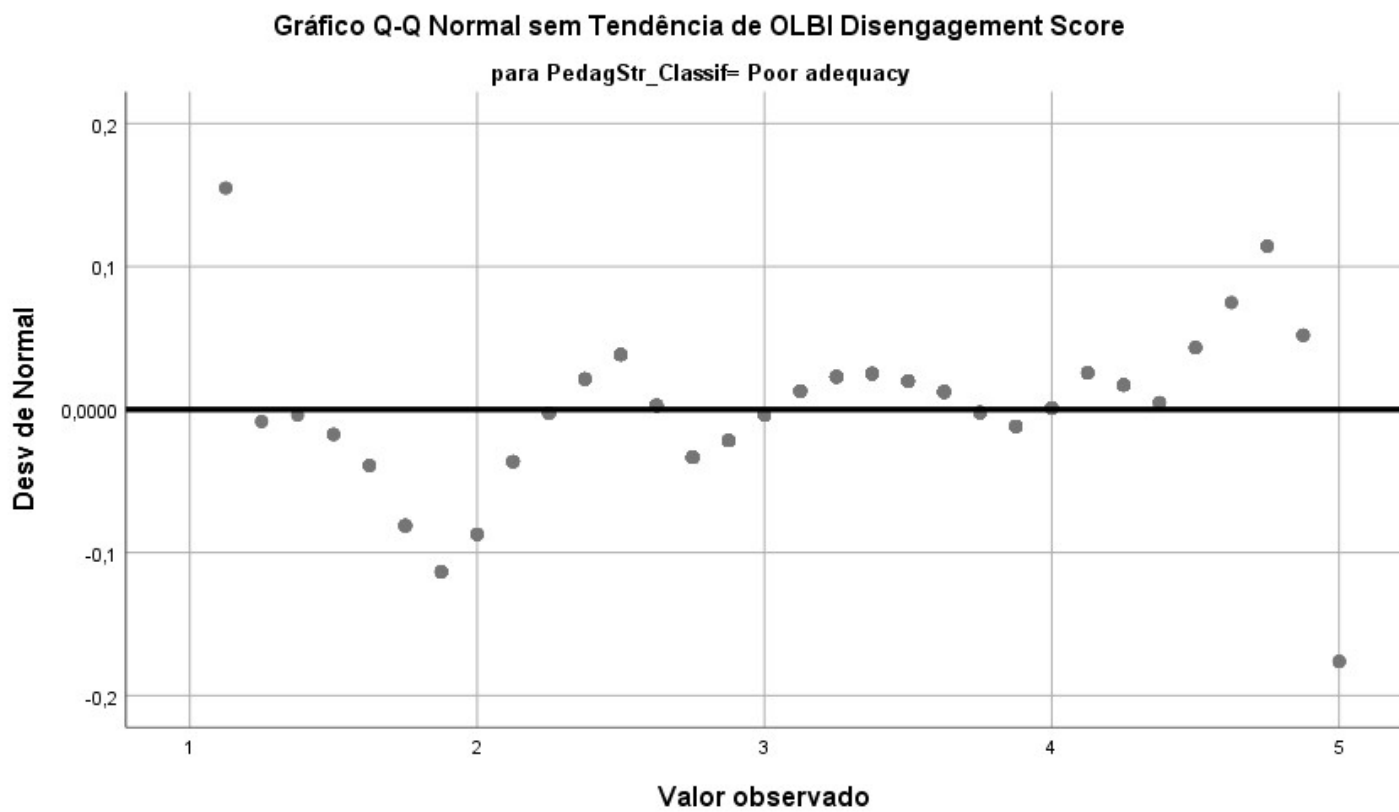

### Gráfico Q-Q Normal sem Tendência de OLBI Disengagement Score

para PedagStr\_Classif= Moderate to good adequacy

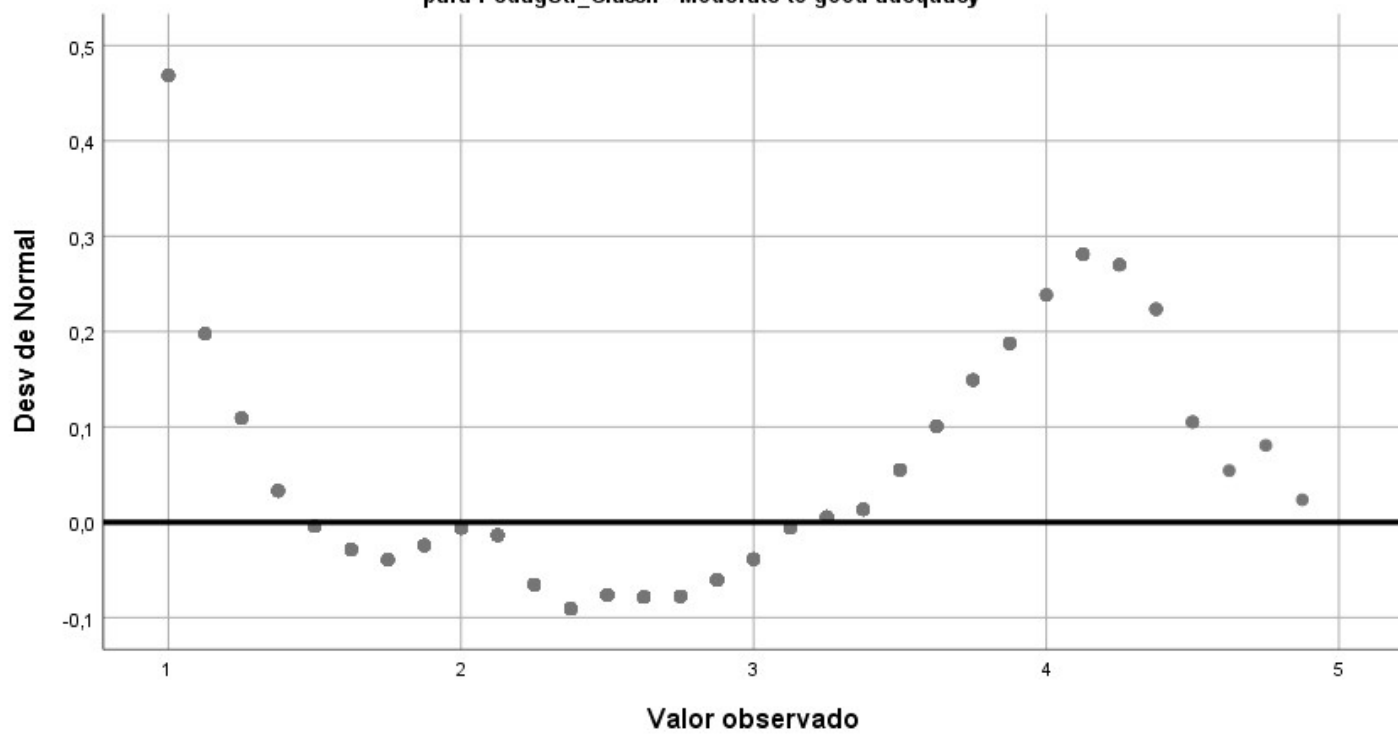

OLBI Exhaustion Score

Histogramas

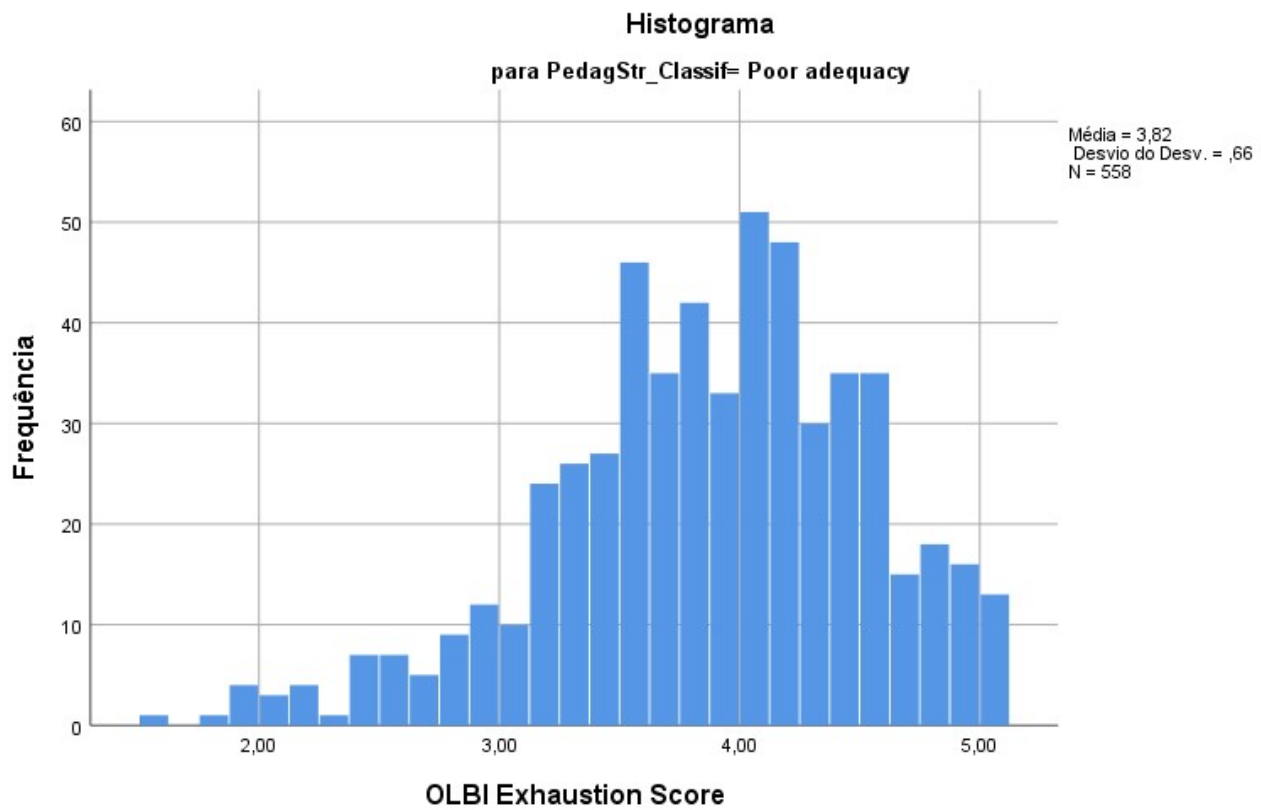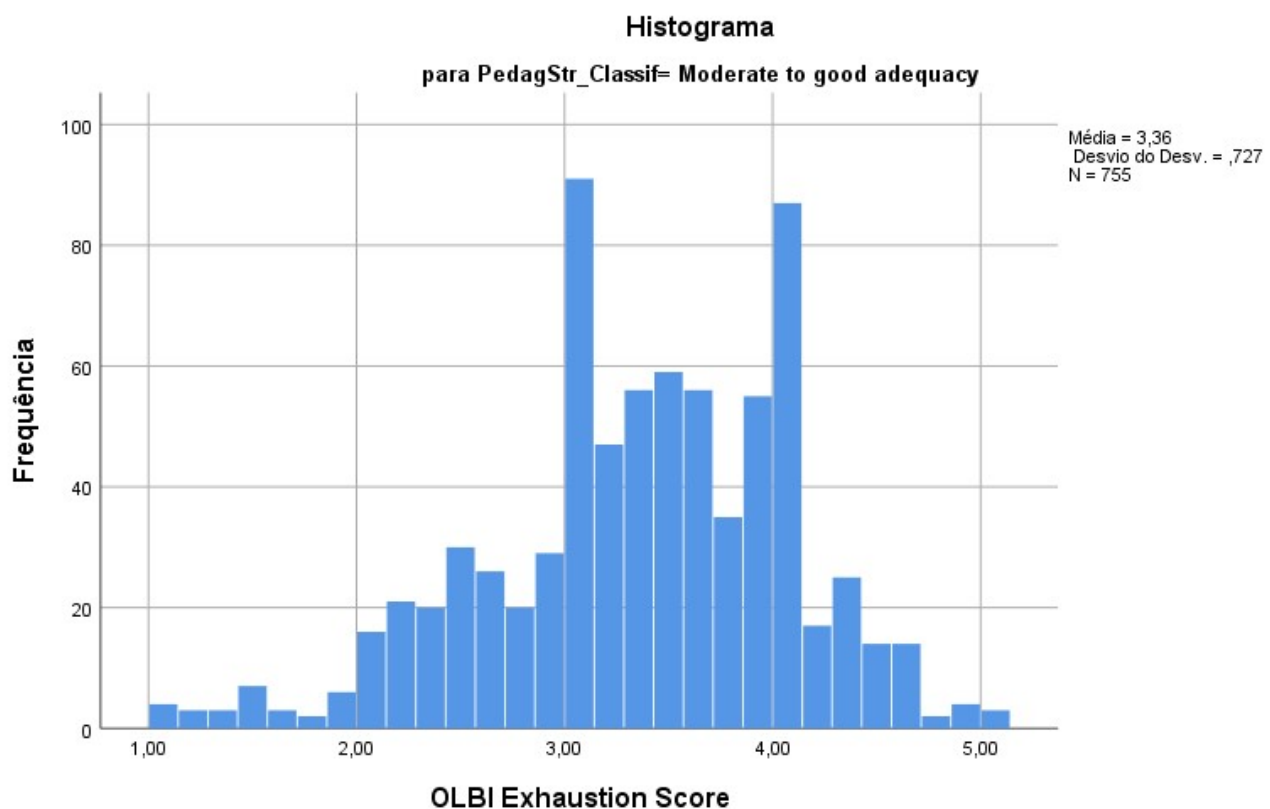

Gráfico Q-Q normais

Gráfico Q-Q Normal de OLBI Exhaustion Score

para PedagStr\_Classif= Poor adequacy

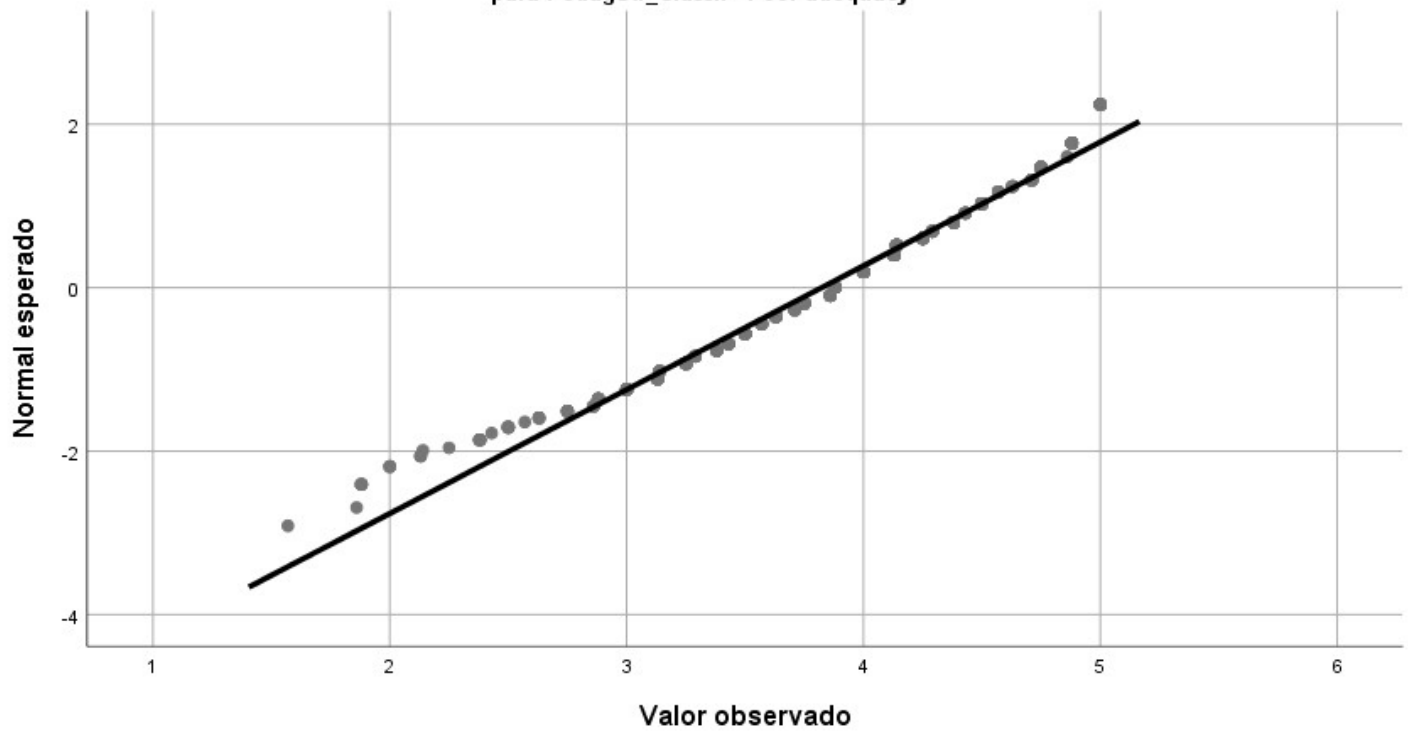

Gráfico Q-Q Normal de OLBI Exhaustion Score

para PedagStr\_Classif= Moderate to good adequacy

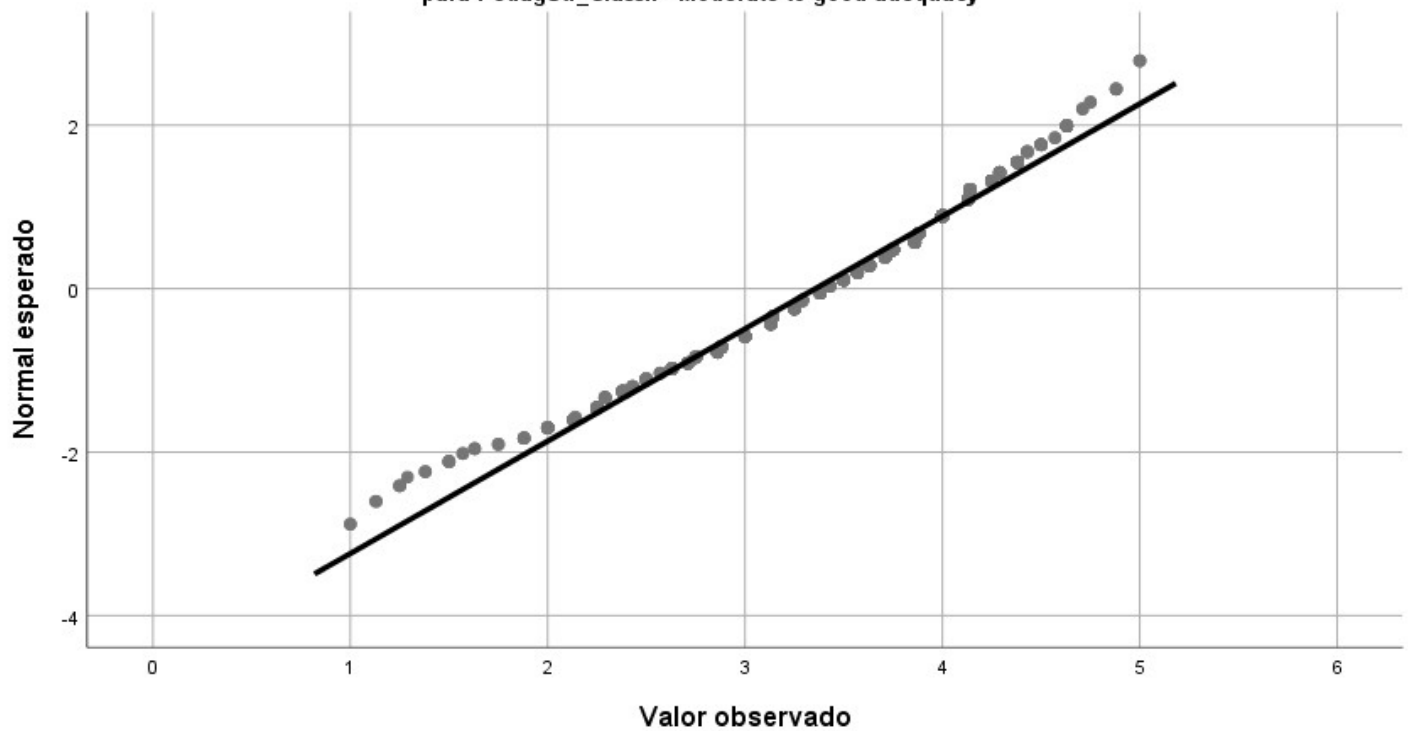

Gráfico Q-Q normais sem tendência

Gráfico Q-Q Normal sem Tendência de OLBI Exhaustion Score

para PedagStr\_Classif= Poor adequacy

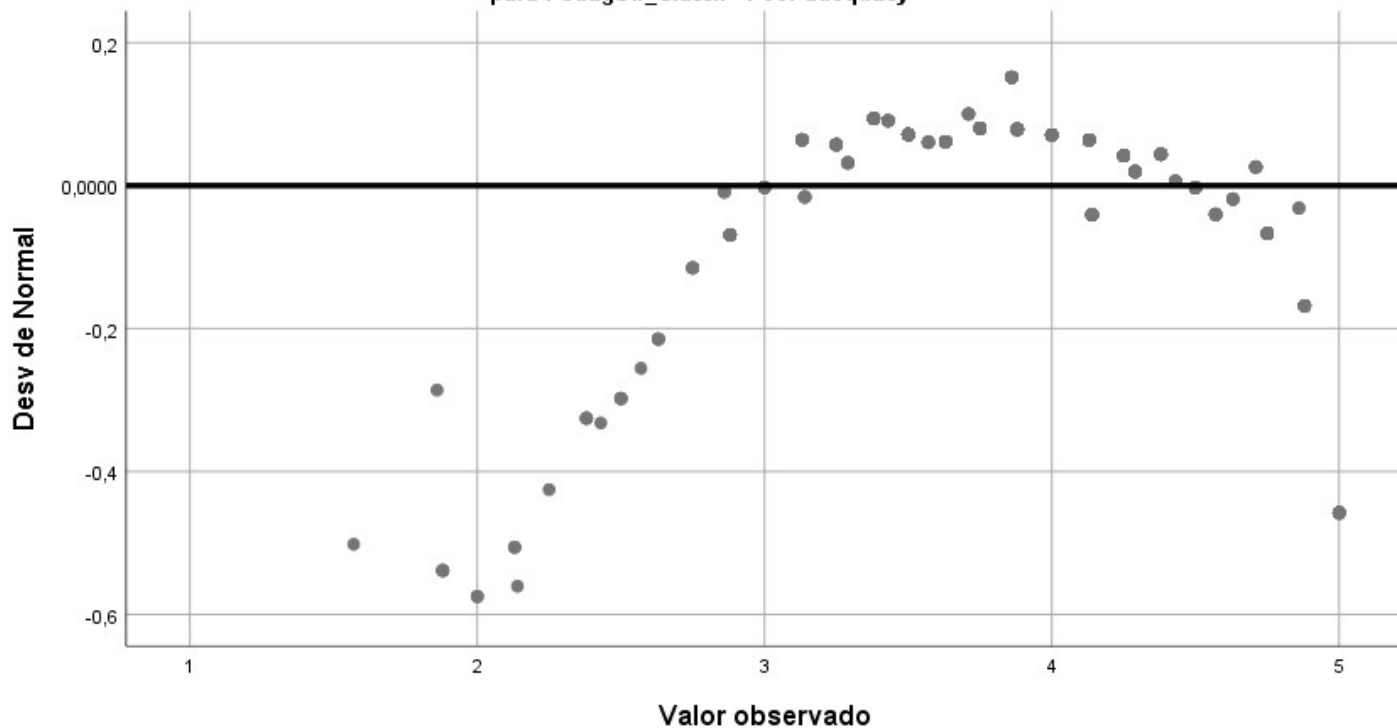

Gráfico Q-Q Normal sem Tendência de OLBI Exhaustion Score

para PedagStr\_Classif= Moderate to good adequacy

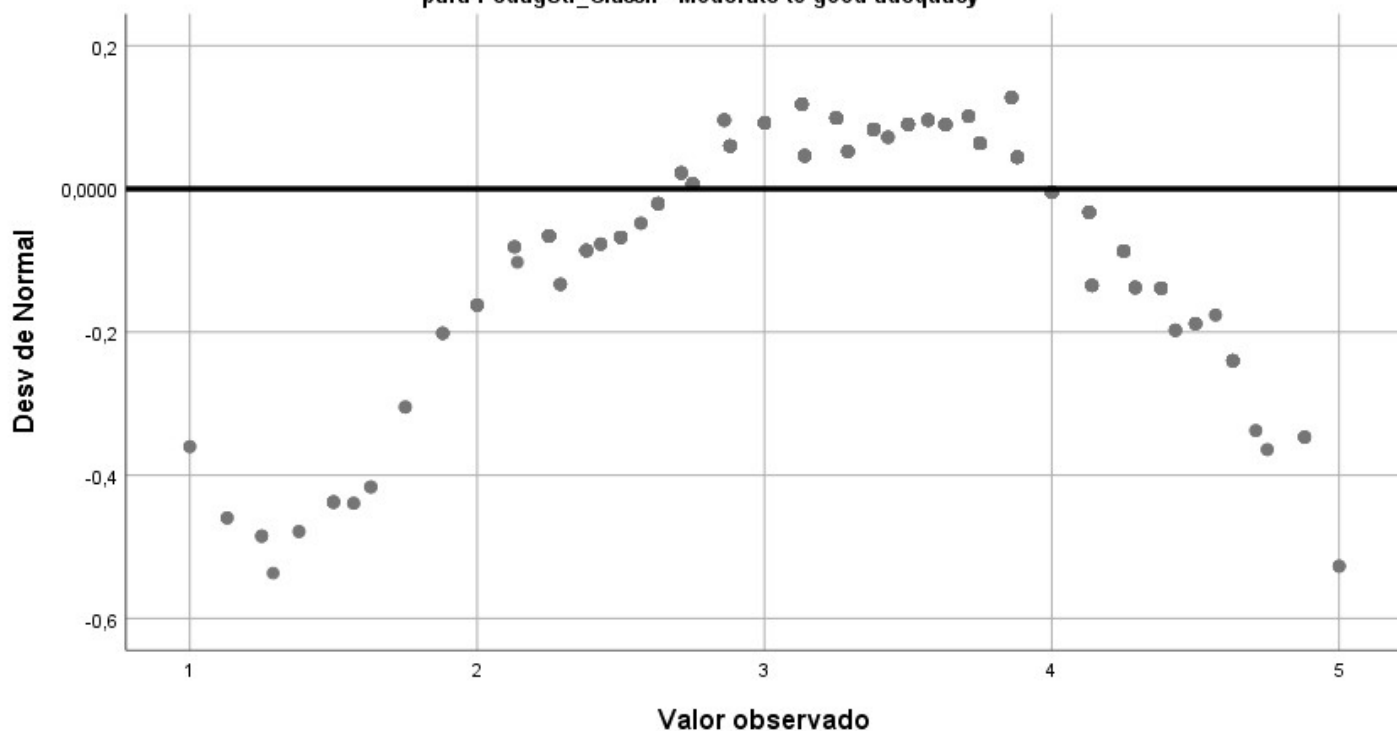

Perceived adequacy of the availability of personal protective equipment, when providing care for patients in the residency program

## Resumo de processamento do caso

|                          | Perceived adequacy of the availability of personal protective equipment, when providing care for patients in the residency program | Casos  |             |        |             |       |             |
|--------------------------|------------------------------------------------------------------------------------------------------------------------------------|--------|-------------|--------|-------------|-------|-------------|
|                          |                                                                                                                                    | Válido |             | Omisso |             | Total |             |
|                          |                                                                                                                                    | N      | Porcentagem | N      | Porcentagem | N     | Porcentagem |
| OLBI Disengagement Score | Poor adequacy                                                                                                                      | 281    | 100,0%      | 0      | 0,0%        | 281   | 100,0%      |
|                          | Good adequacy                                                                                                                      | 1032   | 100,0%      | 0      | 0,0%        | 1032  | 100,0%      |
| OLBI Exhaustion Score    | Poor adequacy                                                                                                                      | 281    | 100,0%      | 0      | 0,0%        | 281   | 100,0%      |
|                          | Good adequacy                                                                                                                      | 1032   | 100,0%      | 0      | 0,0%        | 1032  | 100,0%      |

## Descritivos

|                          |               | Descritivos                                                                                                                        |  |             |           |
|--------------------------|---------------|------------------------------------------------------------------------------------------------------------------------------------|--|-------------|-----------|
|                          |               | Perceived adequacy of the availability of personal protective equipment, when providing care for patients in the residency program |  | Estatística | Erro Erro |
| OLBI Disengagement Score | Poor adequacy | Média                                                                                                                              |  | 3,0810      | ,05123    |
|                          |               | 95% Intervalo de Confiança para Limite inferior                                                                                    |  | 2,9801      |           |
|                          |               | Média Limite superior                                                                                                              |  | 3,1818      |           |
|                          |               | 5% da média aparada                                                                                                                |  | 3,0865      |           |
|                          |               | Mediana                                                                                                                            |  | 3,1250      |           |
|                          |               | Variância                                                                                                                          |  | ,737        |           |
|                          |               | Erro Desvio                                                                                                                        |  | ,85872      |           |
|                          |               | Mínimo                                                                                                                             |  | 1,00        |           |
|                          |               | Máximo                                                                                                                             |  | 5,00        |           |
|                          |               | Intervalo                                                                                                                          |  | 4,00        |           |
|                          |               | Amplitude interquartil                                                                                                             |  | 1,25        |           |
|                          |               | Assimetria                                                                                                                         |  | -,078       | ,145      |
|                          |               | Curtose                                                                                                                            |  | -,512       | ,290      |
|                          | Good adequacy | Média                                                                                                                              |  | 2,6904      | ,02536    |
|                          |               | 95% Intervalo de Confiança para Limite inferior                                                                                    |  | 2,6406      |           |
|                          |               | Média Limite superior                                                                                                              |  | 2,7402      |           |
|                          |               | 5% da média aparada                                                                                                                |  | 2,6761      |           |
|                          |               | Mediana                                                                                                                            |  | 2,6250      |           |
|                          |               | Variância                                                                                                                          |  | ,664        |           |
|                          |               | Erro Desvio                                                                                                                        |  | ,81479      |           |
|                          |               | Mínimo                                                                                                                             |  | 1,00        |           |
|                          |               | Máximo                                                                                                                             |  | 5,00        |           |
|                          |               | Intervalo                                                                                                                          |  | 4,00        |           |
|                          |               | Amplitude interquartil                                                                                                             |  | 1,13        |           |
|                          |               | Assimetria                                                                                                                         |  | ,237        | ,076      |
|                          |               | Curtose                                                                                                                            |  | -,330       | ,152      |
| OLBI Exhaustion Score    | Poor adequacy | Média                                                                                                                              |  | 3,7724      | ,04089    |
|                          |               | 95% Intervalo de Confiança para Limite inferior                                                                                    |  | 3,6919      |           |
|                          |               | Média Limite superior                                                                                                              |  | 3,8529      |           |

|  |               |                                 |                        |        |      |
|--|---------------|---------------------------------|------------------------|--------|------|
|  |               |                                 | 5% da média aparada    | 3,8000 |      |
|  |               |                                 | Mediana                | 3,8800 |      |
|  |               |                                 | Variância              | ,470   |      |
|  |               |                                 | Erro Desvio            | ,68541 |      |
|  |               |                                 | Mínimo                 | 1,00   |      |
|  |               |                                 | Máximo                 | 5,00   |      |
|  |               |                                 | Intervalo              | 4,00   |      |
|  |               |                                 | Amplitude interquartil | ,98    |      |
|  |               |                                 | Assimetria             | -,638  | ,145 |
|  |               |                                 | Curtose                | ,432   | ,290 |
|  | Good adequacy | Média                           | 3,4953                 | ,02300 |      |
|  |               | 95% Intervalo de Confiança para | Limite inferior        | 3,4502 |      |
|  |               | Média                           | Limite superior        | 3,5404 |      |
|  |               | 5% da média aparada             | 3,5180                 |        |      |
|  |               | Mediana                         | 3,5700                 |        |      |
|  |               | Variância                       | ,546                   |        |      |
|  |               | Erro Desvio                     | ,73877                 |        |      |
|  |               | Mínimo                          | 1,00                   |        |      |
|  |               | Máximo                          | 5,00                   |        |      |
|  |               | Intervalo                       | 4,00                   |        |      |
|  |               | Amplitude interquartil          | ,87                    |        |      |
|  |               | Assimetria                      | -,496                  | ,076   |      |
|  |               | Curtose                         | ,203                   | ,152   |      |

| Percentis                     |                          |                                                                                                                                    |        |        |        |        |        |        |        |
|-------------------------------|--------------------------|------------------------------------------------------------------------------------------------------------------------------------|--------|--------|--------|--------|--------|--------|--------|
|                               |                          | Perceived adequacy of the availability of personal protective equipment, when providing care for patients in the residency program | 5      | 10     | 25     | 50     | 75     | 90     | 95     |
| Média Ponderada (Definição 1) | OLBI Disengagement Score | Poor adequacy                                                                                                                      | 1,6250 | 2,0000 | 2,5000 | 3,1250 | 3,7500 | 4,2500 | 4,5000 |
|                               |                          | Good adequacy                                                                                                                      | 1,3750 | 1,6250 | 2,1250 | 2,6250 | 3,2500 | 3,7500 | 4,1250 |
|                               | OLBI Exhaustion Score    | Poor adequacy                                                                                                                      | 2,5130 | 2,8800 | 3,2900 | 3,8800 | 4,2700 | 4,5560 | 4,7500 |
|                               |                          | Good adequacy                                                                                                                      | 2,2115 | 2,5000 | 3,1300 | 3,5700 | 4,0000 | 4,3800 | 4,6300 |
| Teste de Tukey                | OLBI Disengagement Score | Poor adequacy                                                                                                                      |        |        | 2,5000 | 3,1250 | 3,7500 |        |        |
|                               |                          | Good adequacy                                                                                                                      |        |        | 2,1250 | 2,6250 | 3,2500 |        |        |
|                               | OLBI Exhaustion Score    | Poor adequacy                                                                                                                      |        |        | 3,2900 | 3,8800 | 4,2500 |        |        |
|                               |                          | Good adequacy                                                                                                                      |        |        | 3,1300 | 3,5700 | 4,0000 |        |        |

| Testes de Normalidade |                           |                                                                       |
|-----------------------|---------------------------|-----------------------------------------------------------------------|
|                       | Perceived adequacy of the | <div> Kolmogorov-Smirnov<sup>a</sup> </div> <div> Shapiro-Wilk </div> |

|                          |               |                                                                                                          |      |      |             |      |      |
|--------------------------|---------------|----------------------------------------------------------------------------------------------------------|------|------|-------------|------|------|
|                          |               | availability of personal protective equipment, when providing care for patients in the residency program |      |      |             |      |      |
|                          |               | Estatística                                                                                              | df   | Sig. | Estatística | df   | Sig. |
| OLBI Disengagement Score | Poor adequacy | ,053                                                                                                     | 281  | ,059 | ,990        | 281  | ,060 |
|                          | Good adequacy | ,062                                                                                                     | 1032 | ,000 | ,990        | 1032 | ,000 |
| OLBI Exhaustion Score    | Poor adequacy | ,106                                                                                                     | 281  | ,000 | ,970        | 281  | ,000 |
|                          | Good adequacy | ,070                                                                                                     | 1032 | ,000 | ,981        | 1032 | ,000 |

a. Correlação de Significância de Lilliefors

OLBI Disengagement Score

Histogramas

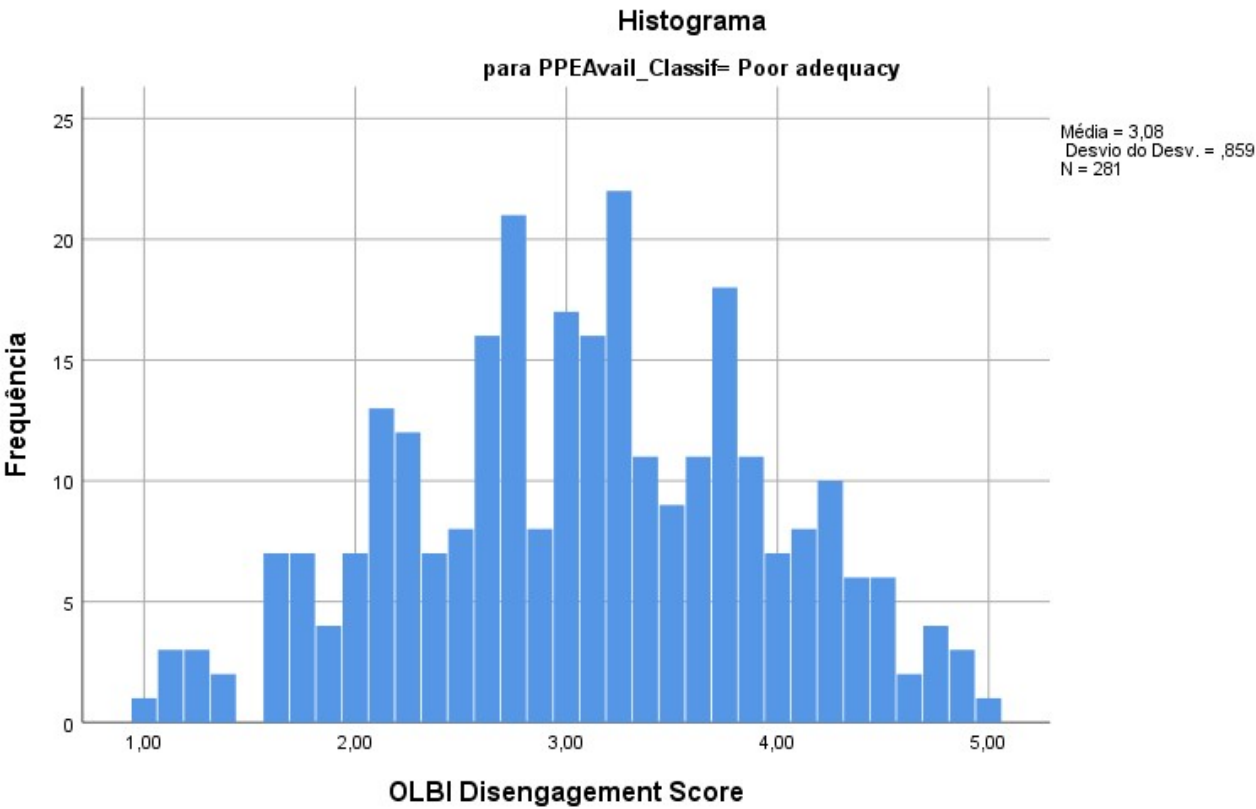

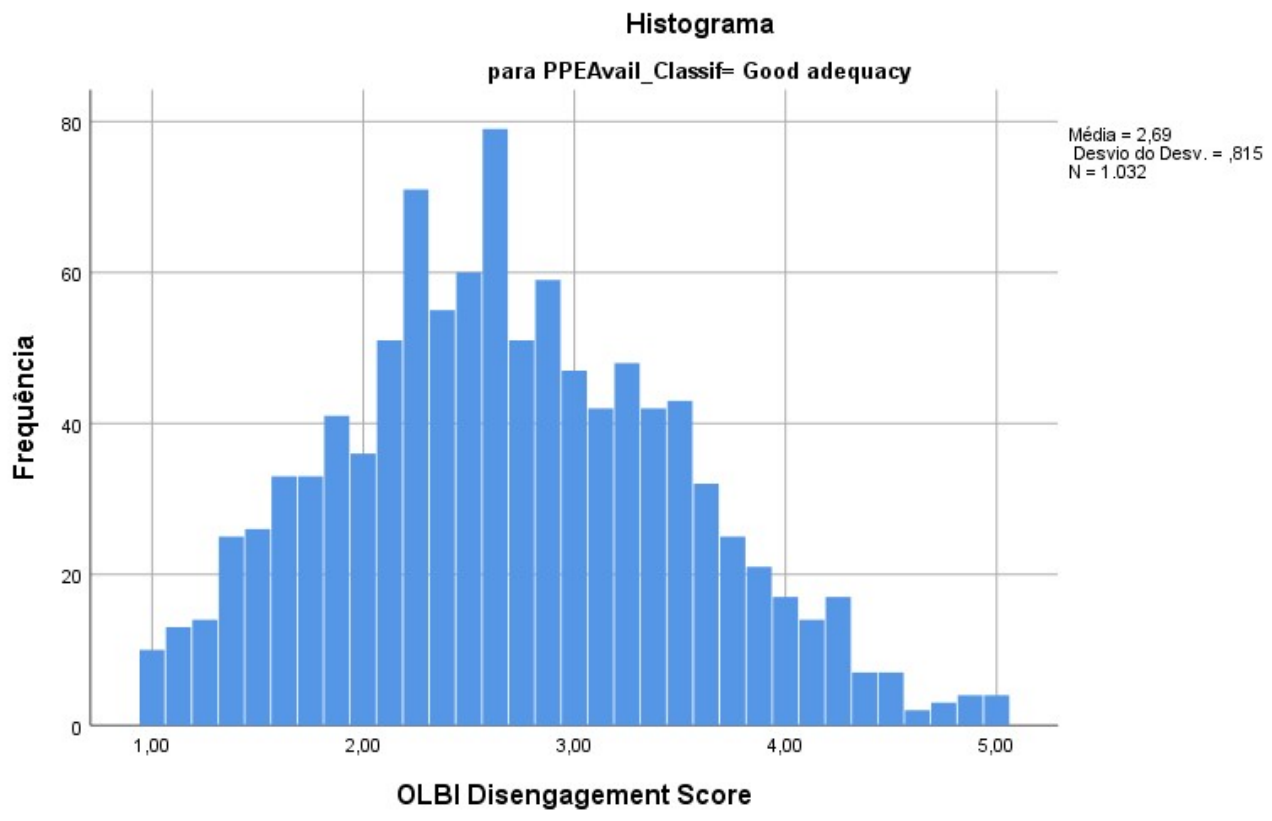

Gráfico Q-Q normais

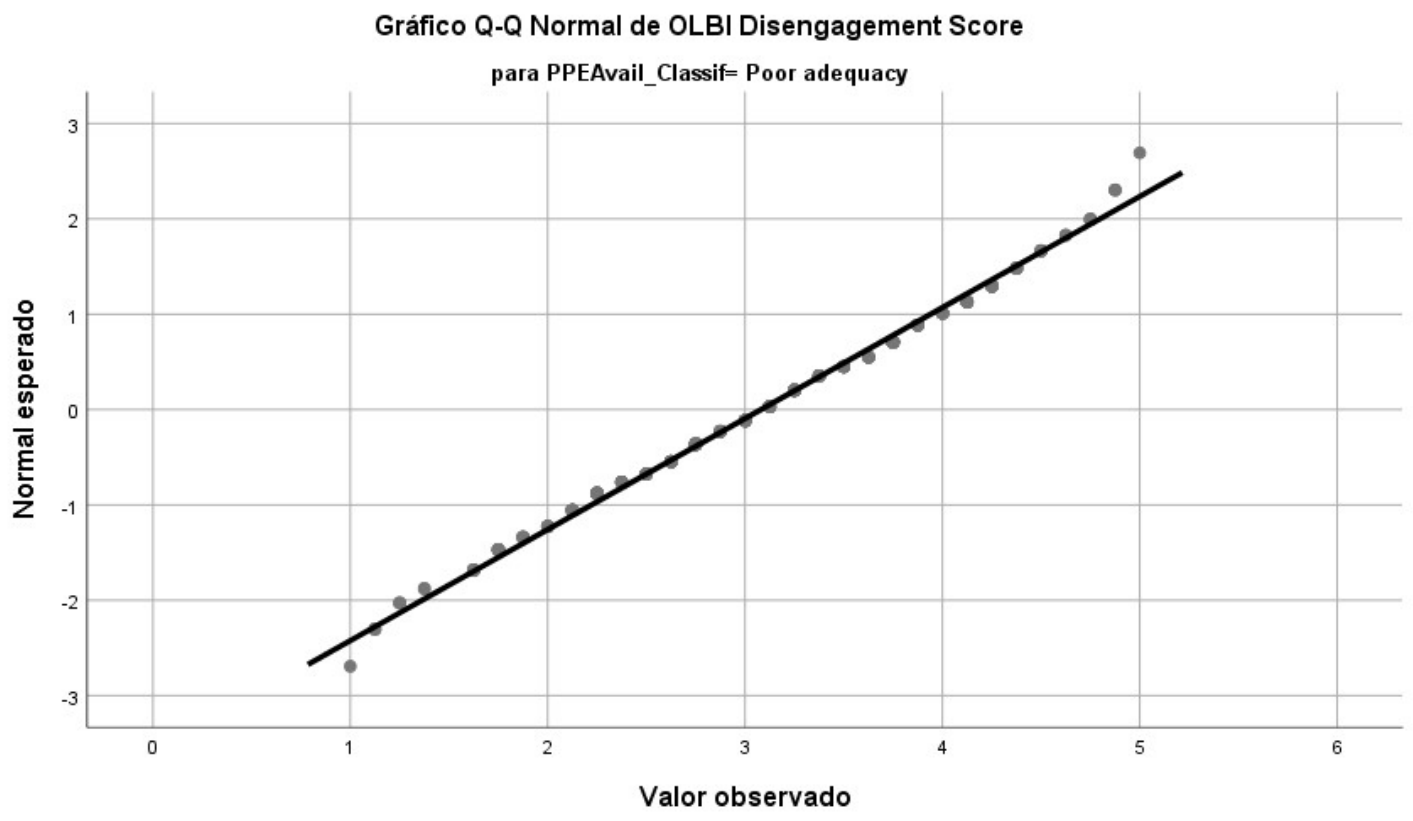

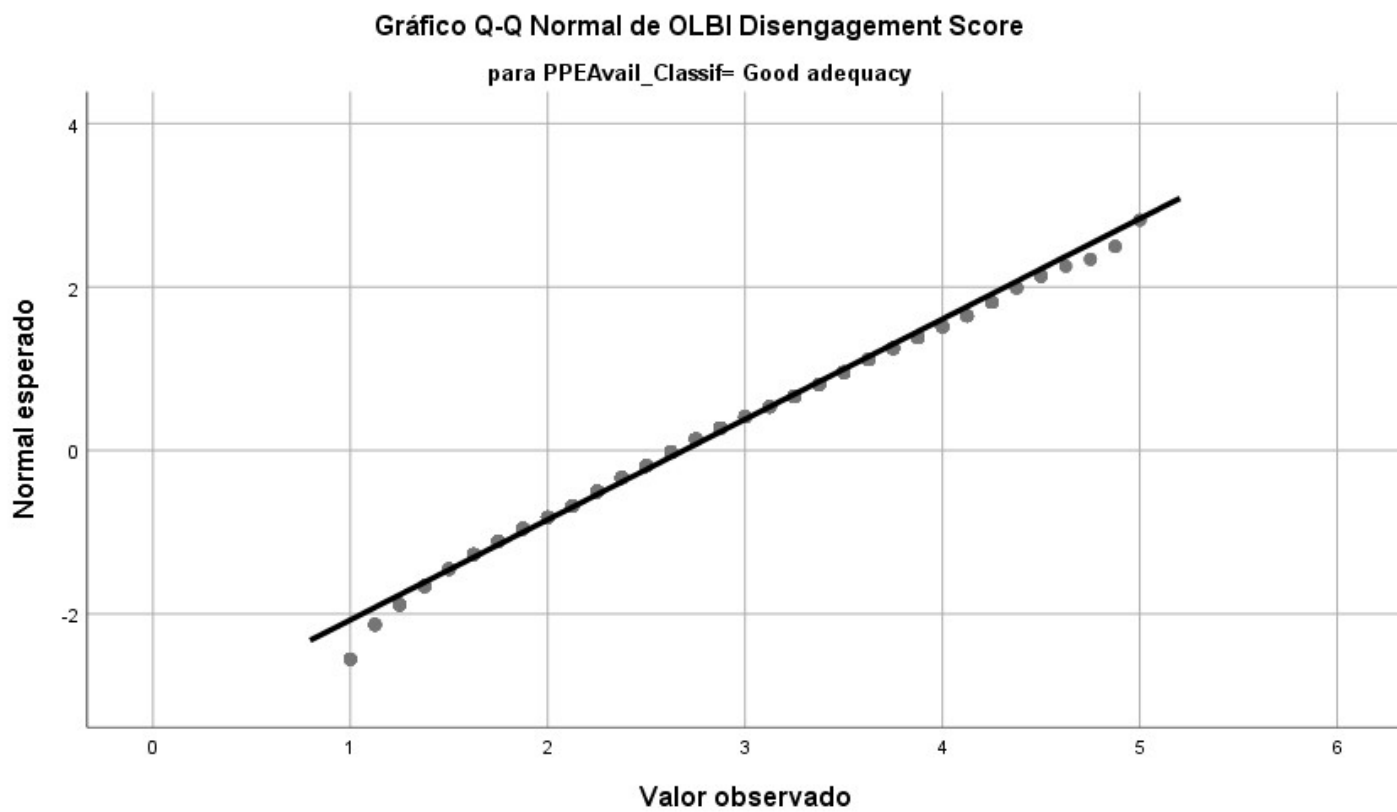

Gráfico Q-Q normais sem tendência

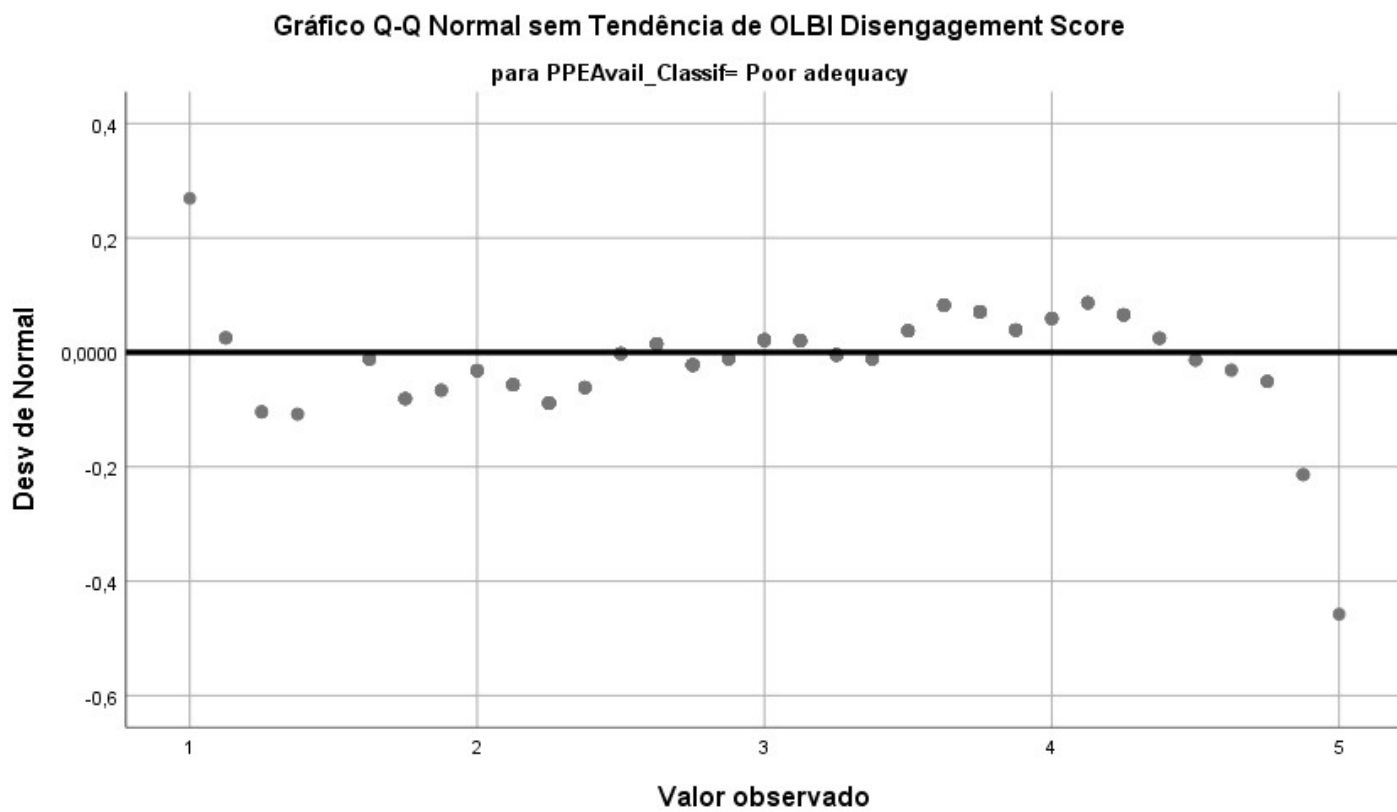

### Gráfico Q-Q Normal sem Tendência de OLBI Disengagement Score

para PPEAvail\_Classif= Good adequacy

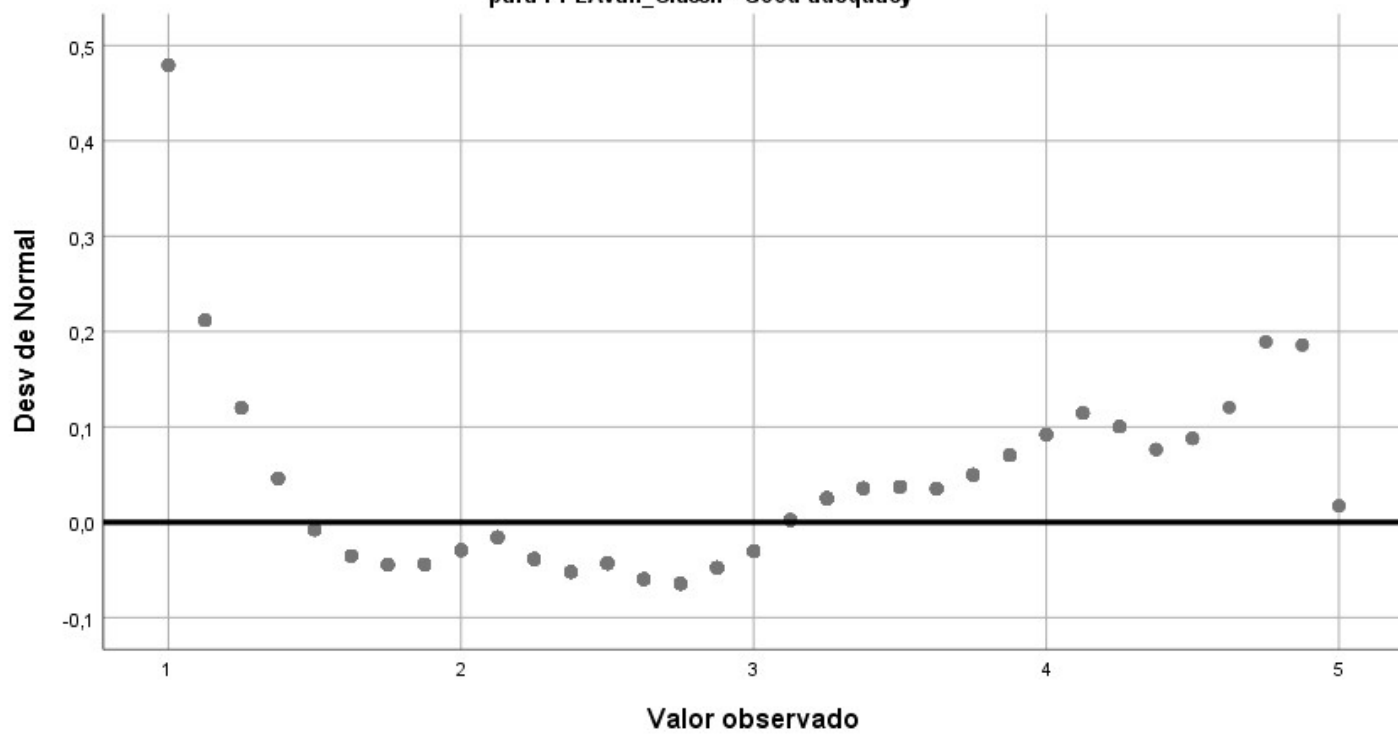

OLBI Exhaustion Score

Histogramas

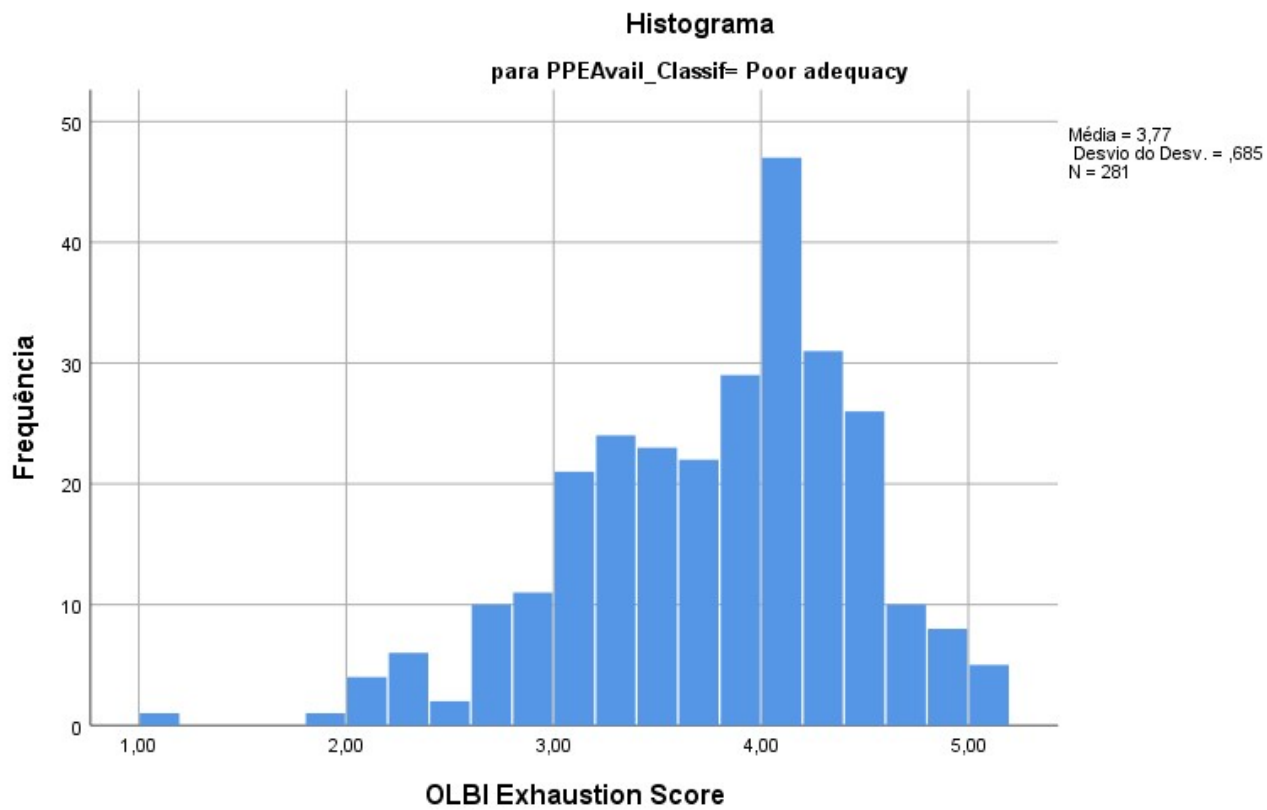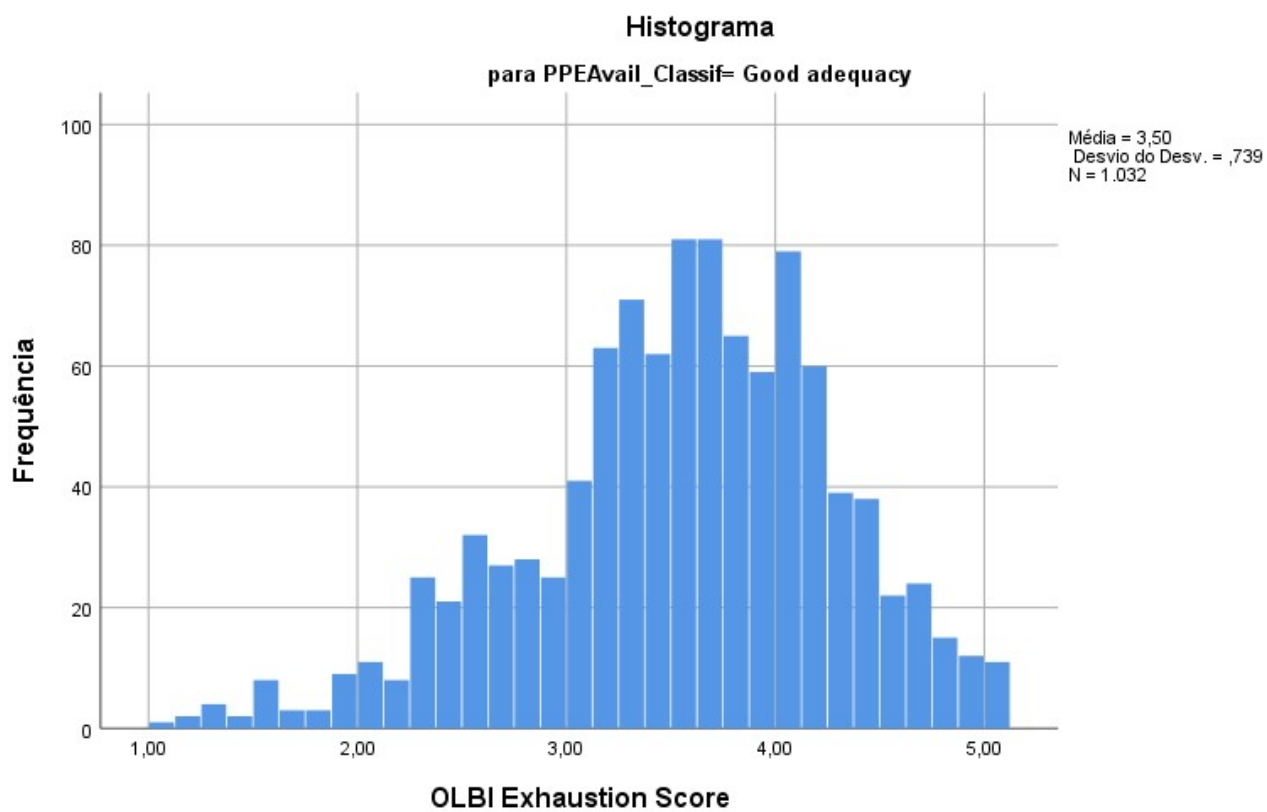

Gráfico Q-Q normais

Gráfico Q-Q Normal de OLBI Exhaustion Score

para PPEAvail\_Classif= Poor adequacy

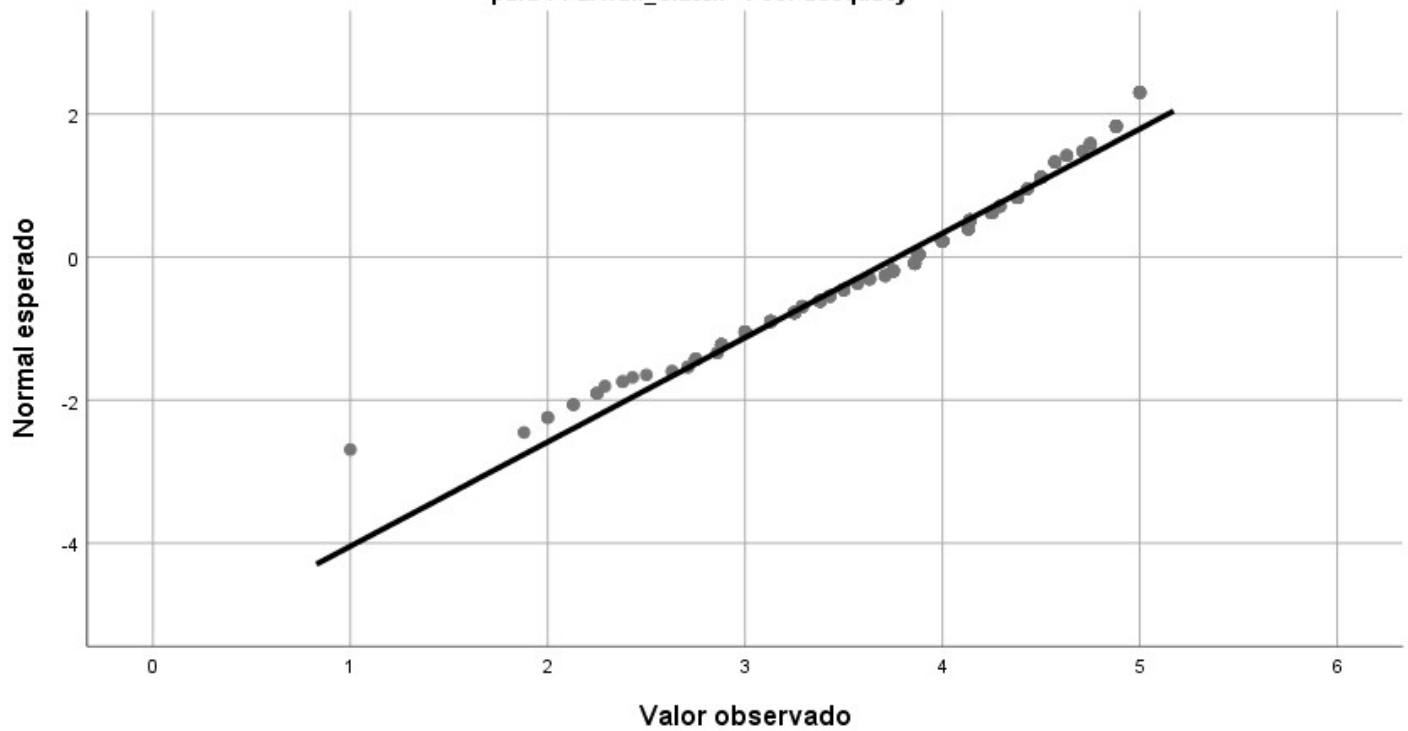

Gráfico Q-Q Normal de OLBI Exhaustion Score

para PPEAvail\_Classif= Good adequacy

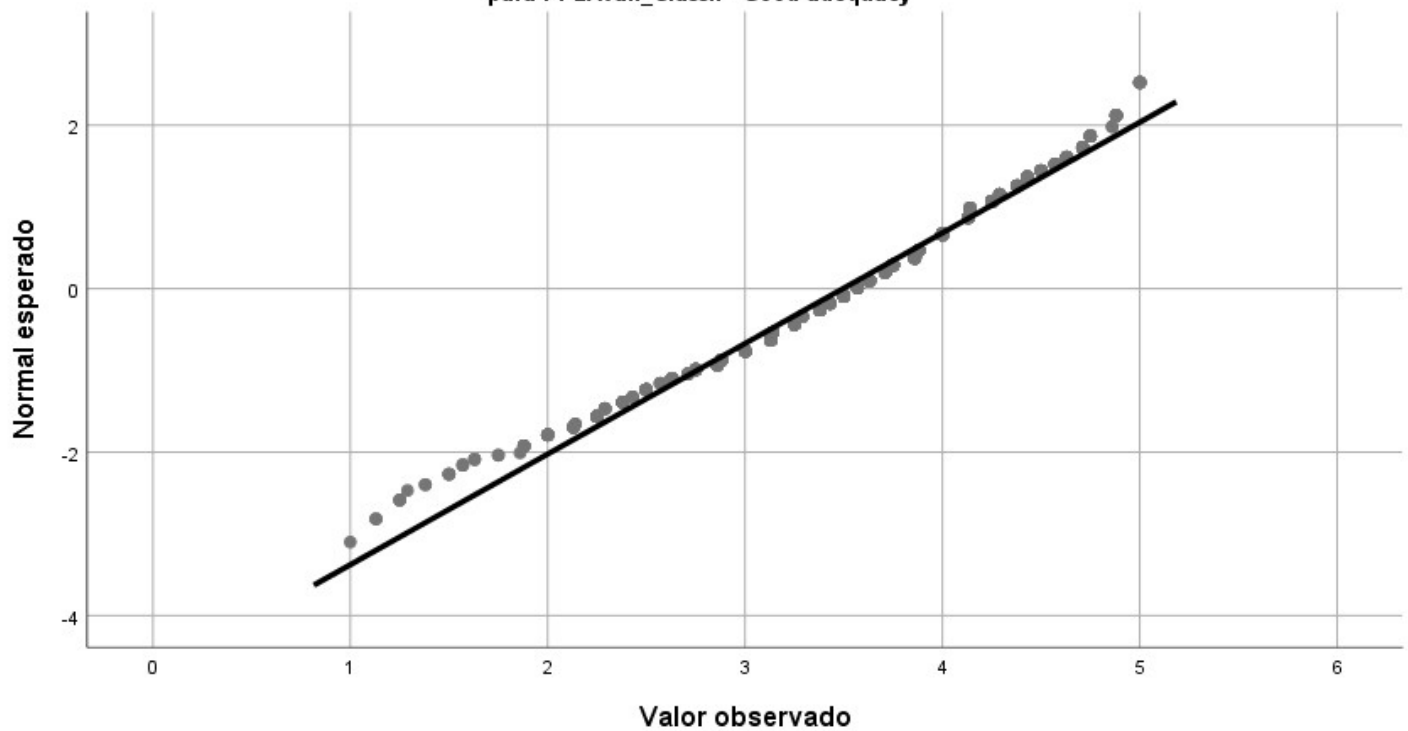

Gráfico Q-Q normais sem tendência

Gráfico Q-Q Normal sem Tendência de OLBI Exhaustion Score

para PPEAvail\_Classif= Poor adequacy

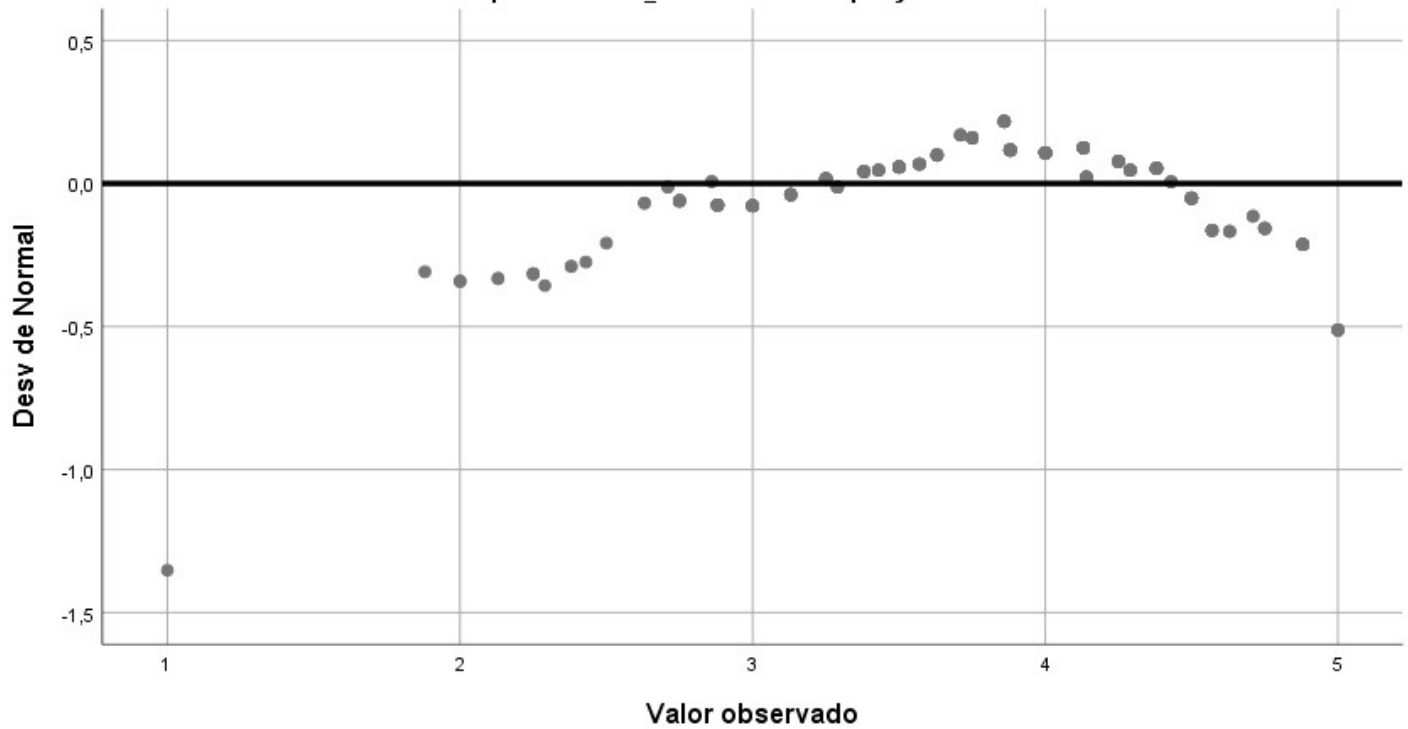

Gráfico Q-Q Normal sem Tendência de OLBI Exhaustion Score

para PPEAvail\_Classif= Good adequacy

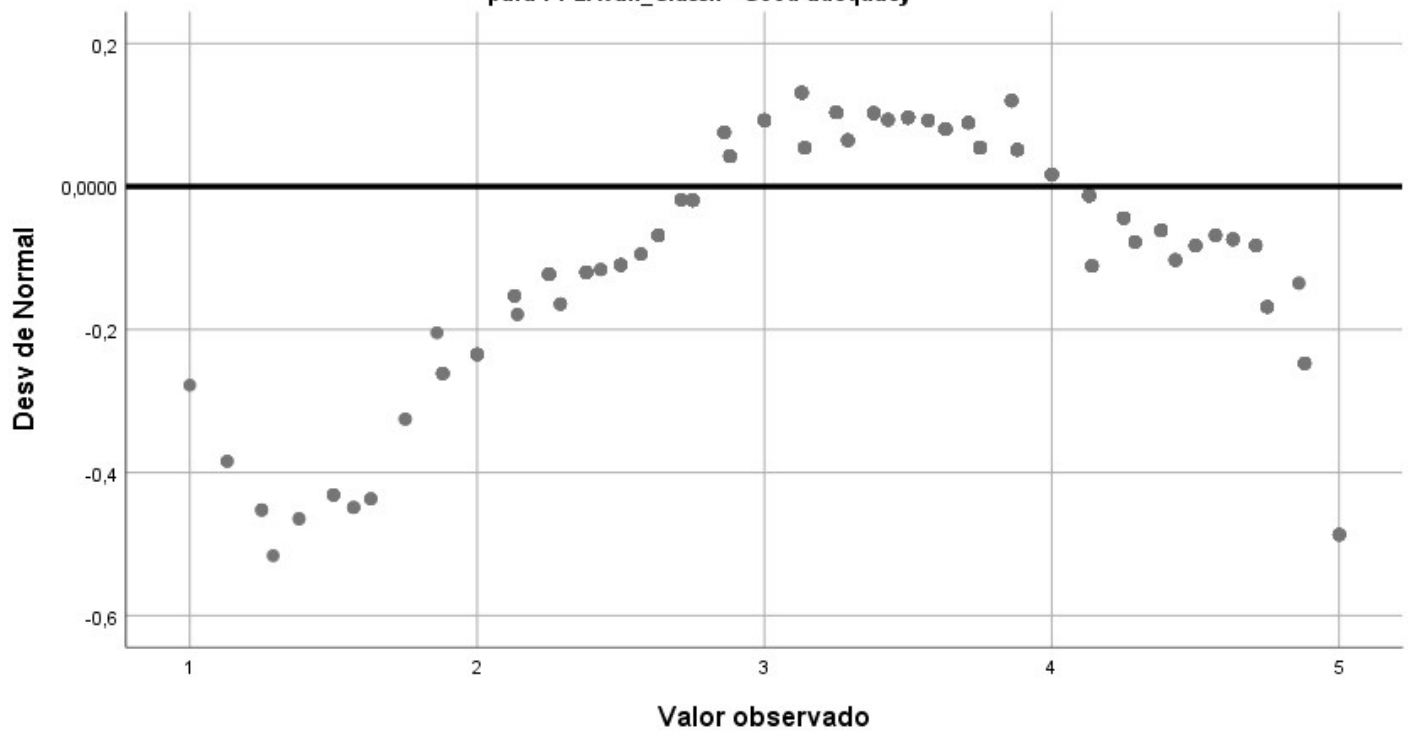

Cumulative weekly workload < or >= 60h (dichotomous)

Resumo de processamento do caso

|                                                      |       | Casos  |             |        |             |       |             |
|------------------------------------------------------|-------|--------|-------------|--------|-------------|-------|-------------|
|                                                      |       | Válido |             | Omisso |             | Total |             |
| Cumulative weekly workload < or >= 60h (dichotomous) |       | N      | Porcentagem | N      | Porcentagem | N     | Porcentagem |
| OLBI Disengagement Score                             | <=60h | 541    | 100,0%      | 0      | 0,0%        | 541   | 100,0%      |
|                                                      | >60h  | 772    | 100,0%      | 0      | 0,0%        | 772   | 100,0%      |
| OLBI Exhaustion Score                                | <=60h | 541    | 100,0%      | 0      | 0,0%        | 541   | 100,0%      |
|                                                      | >60h  | 772    | 100,0%      | 0      | 0,0%        | 772   | 100,0%      |

Descritivos

|                          |       | Cumulative weekly workload < or >= 60h (dichotomous) |                 | Estatística | Erro Erro |
|--------------------------|-------|------------------------------------------------------|-----------------|-------------|-----------|
| OLBI Disengagement Score | <=60h | Média                                                |                 | 2,7426      | ,03603    |
|                          |       | 95% Intervalo de Confiança para                      | Limite inferior | 2,6718      |           |
|                          |       | Média                                                | Limite superior | 2,8134      |           |
|                          |       | 5% da média aparada                                  |                 | 2,7225      |           |
|                          |       | Mediana                                              |                 | 2,6250      |           |
|                          |       | Variância                                            |                 | ,702        |           |
|                          |       | Erro Desvio                                          |                 | ,83801      |           |
|                          |       | Mínimo                                               |                 | 1,00        |           |
|                          |       | Máximo                                               |                 | 5,00        |           |
|                          |       | Intervalo                                            |                 | 4,00        |           |
|                          |       | Amplitude interquartil                               |                 | 1,13        |           |
|                          |       | Assimetria                                           |                 | ,293        | ,105      |
|                          |       | Curtose                                              |                 | -,268       | ,210      |
|                          | >60h  | Média                                                |                 | 2,7960      | ,03025    |
|                          |       | 95% Intervalo de Confiança para                      | Limite inferior | 2,7366      |           |
|                          |       | Média                                                | Limite superior | 2,8554      |           |
|                          |       | 5% da média aparada                                  |                 | 2,7916      |           |
|                          |       | Mediana                                              |                 | 2,7500      |           |
|                          |       | Variância                                            |                 | ,706        |           |
|                          |       | Erro Desvio                                          |                 | ,84037      |           |
|                          |       | Mínimo                                               |                 | 1,00        |           |
|                          |       | Máximo                                               |                 | 5,00        |           |
|                          |       | Intervalo                                            |                 | 4,00        |           |
|                          |       | Amplitude interquartil                               |                 | 1,13        |           |
|                          |       | Assimetria                                           |                 | ,112        | ,088      |
|                          |       | Curtose                                              |                 | -,516       | ,176      |
| OLBI Exhaustion Score    | <=60h | Média                                                |                 | 3,4599      | ,03254    |
|                          |       | 95% Intervalo de Confiança para                      | Limite inferior | 3,3960      |           |
|                          |       | Média                                                | Limite superior | 3,5238      |           |
|                          |       | 5% da média aparada                                  |                 | 3,4809      |           |
|                          |       | Mediana                                              |                 | 3,5000      |           |
|                          |       | Variância                                            |                 | ,573        |           |

|      |                                 |                        |                 |        |
|------|---------------------------------|------------------------|-----------------|--------|
|      |                                 | Erro Desvio            | ,75677          |        |
|      |                                 | Mínimo                 | 1,25            |        |
|      |                                 | Máximo                 | 5,00            |        |
|      |                                 | Intervalo              | 3,75            |        |
|      |                                 | Amplitude interquartil | 1,00            |        |
|      |                                 | Assimetria             | -,434           | ,105   |
|      |                                 | Curtose                | -,084           | ,210   |
| >60h |                                 | Média                  | 3,6210          | ,02572 |
|      | 95% Intervalo de Confiança para | Limite inferior        | 3,5705          |        |
|      |                                 | Média                  | Limite superior | 3,6715 |
|      | 5% da média aparada             |                        | 3,6461          |        |
|      | Mediana                         |                        | 3,7100          |        |
|      | Variância                       |                        | ,511            |        |
|      | Erro Desvio                     |                        | ,71457          |        |
|      | Mínimo                          |                        | 1,00            |        |
|      | Máximo                          |                        | 5,00            |        |
|      | Intervalo                       |                        | 4,00            |        |
|      | Amplitude interquartil          |                        | ,88             |        |
|      | Assimetria                      |                        | -,583           | ,088   |
|      | Curtose                         |                        | ,516            | ,176   |

| Percentis                     |                          |                                                      |        |        |        |        |        |        |        |
|-------------------------------|--------------------------|------------------------------------------------------|--------|--------|--------|--------|--------|--------|--------|
|                               |                          | Cumulative weekly workload < or >= 60h (dichotomous) |        |        |        |        |        |        |        |
|                               |                          | Percentis                                            |        |        |        |        |        |        |        |
|                               |                          | 5                                                    | 10     | 25     | 50     | 75     | 90     | 95     |        |
| Média Ponderada (Definição 1) | OLBI Disengagement Score | <=60h                                                | 1,3750 | 1,6250 | 2,1250 | 2,6250 | 3,2500 | 3,8750 | 4,2500 |
|                               |                          | >60h                                                 | 1,3750 | 1,7500 | 2,2500 | 2,7500 | 3,3750 | 4,0000 | 4,2500 |
|                               | OLBI Exhaustion Score    | <=60h                                                | 2,0000 | 2,3800 | 3,0000 | 3,5000 | 4,0000 | 4,3800 | 4,6300 |
|                               |                          | >60h                                                 | 2,2900 | 2,6300 | 3,2500 | 3,7100 | 4,1300 | 4,5000 | 4,7100 |
| Teste de Tukey                | OLBI Disengagement Score | <=60h                                                |        |        | 2,1250 | 2,6250 | 3,2500 |        |        |
|                               |                          | >60h                                                 |        |        | 2,2500 | 2,7500 | 3,3750 |        |        |
|                               | OLBI Exhaustion Score    | <=60h                                                |        |        | 3,0000 | 3,5000 | 4,0000 |        |        |
|                               |                          | >60h                                                 |        |        | 3,2500 | 3,7100 | 4,1300 |        |        |

| Testes de Normalidade    |       |                                                      |     |      |                                 |     |      |
|--------------------------|-------|------------------------------------------------------|-----|------|---------------------------------|-----|------|
|                          |       | Cumulative weekly workload < or >= 60h (dichotomous) |     |      | Kolmogorov-Smirnov <sup>a</sup> |     |      |
|                          |       |                                                      |     |      | Shapiro-Wilk                    |     |      |
|                          |       | Estatística                                          | df  | Sig. | Estatística                     | df  | Sig. |
| OLBI Disengagement Score | <=60h | ,057                                                 | 541 | ,000 | ,987                            | 541 | ,000 |
|                          | >60h  | ,055                                                 | 772 | ,000 | ,991                            | 772 | ,000 |
| OLBI Exhaustion Score    | <=60h | ,074                                                 | 541 | ,000 | ,982                            | 541 | ,000 |
|                          | >60h  | ,068                                                 | 772 | ,000 | ,977                            | 772 | ,000 |

a. Correlação de Significância de Lilliefors

Histogramas

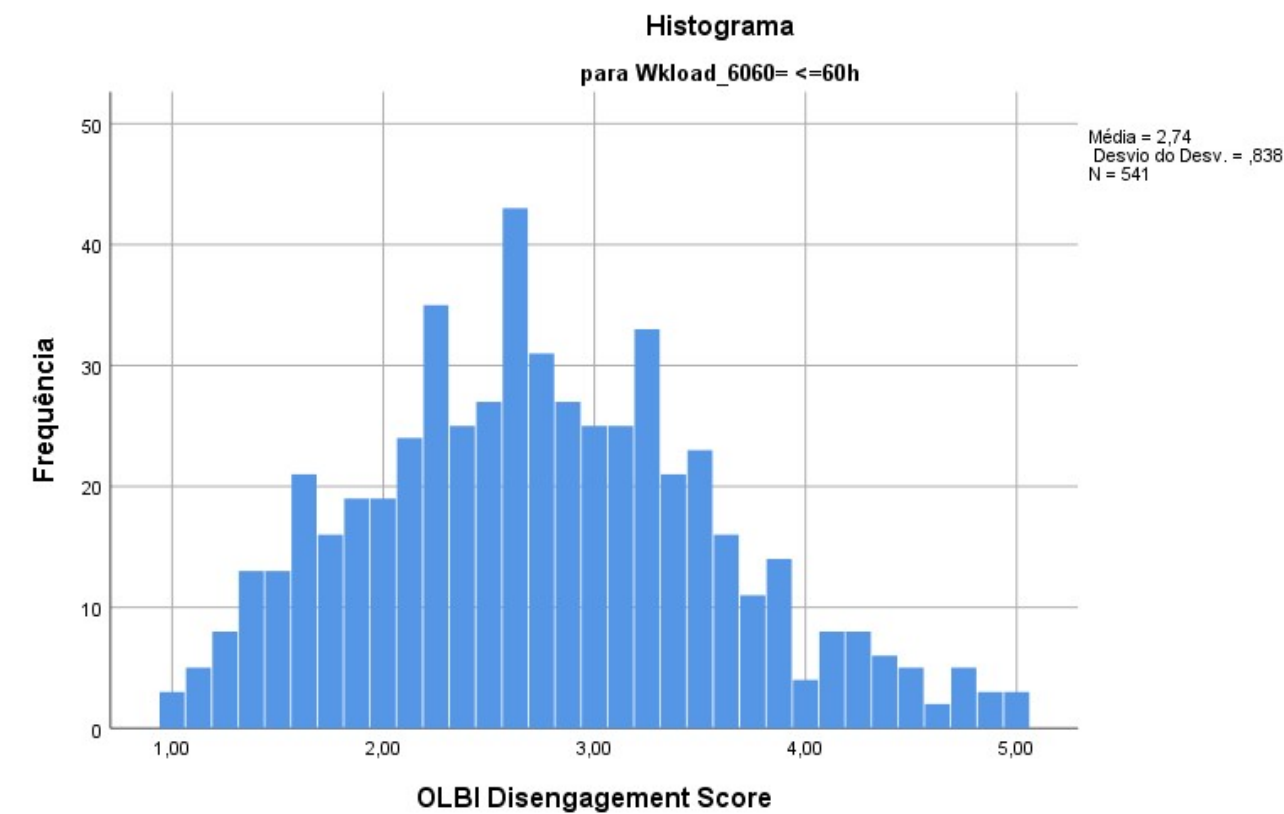

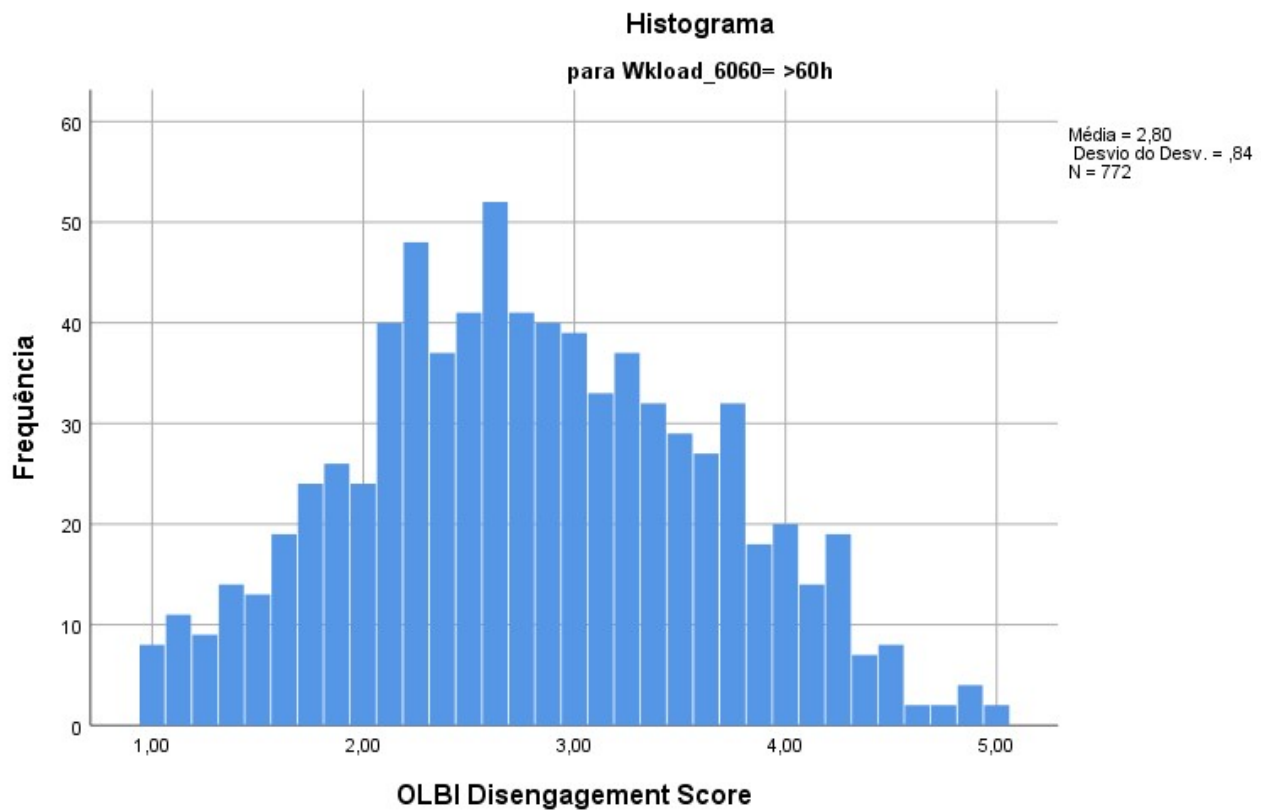

Gráfico Q-Q normais

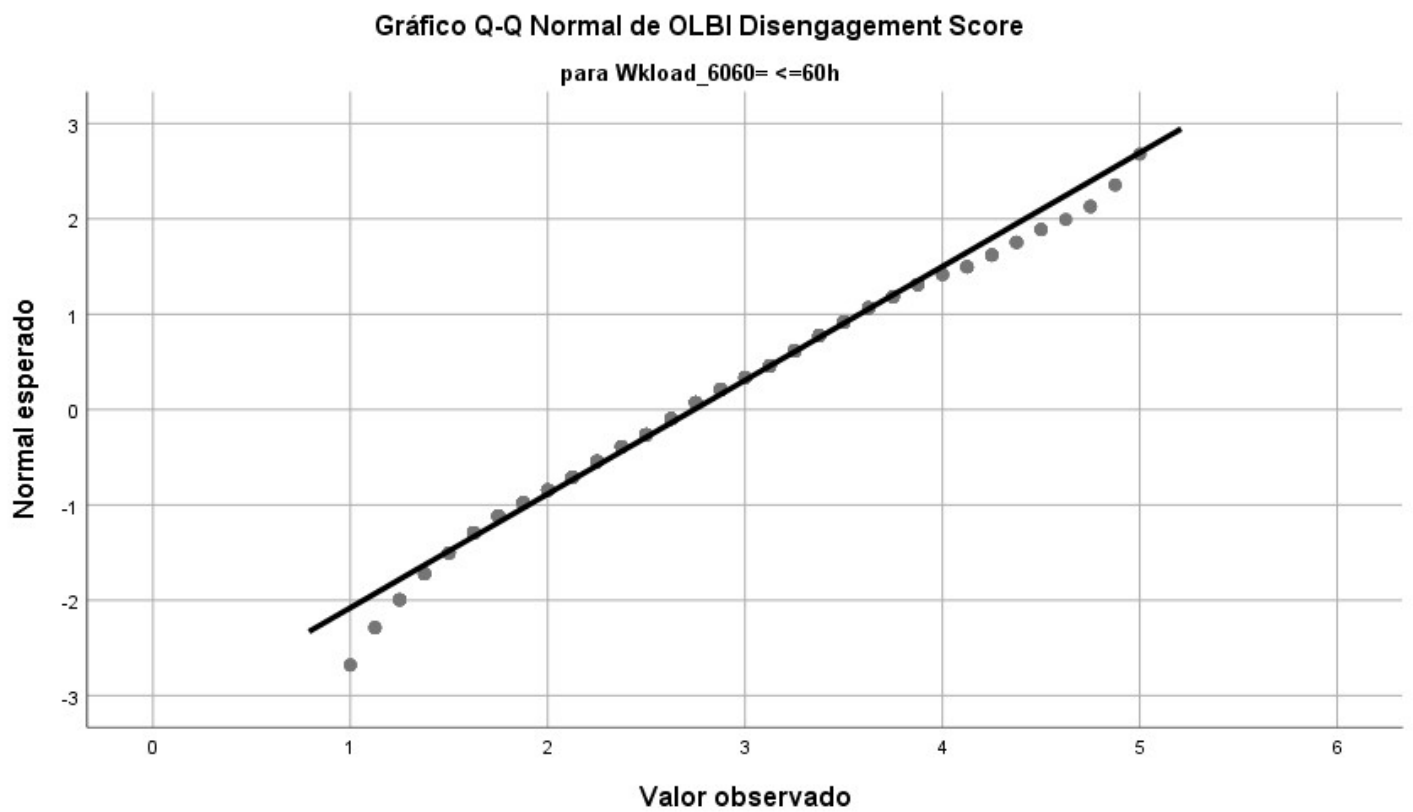

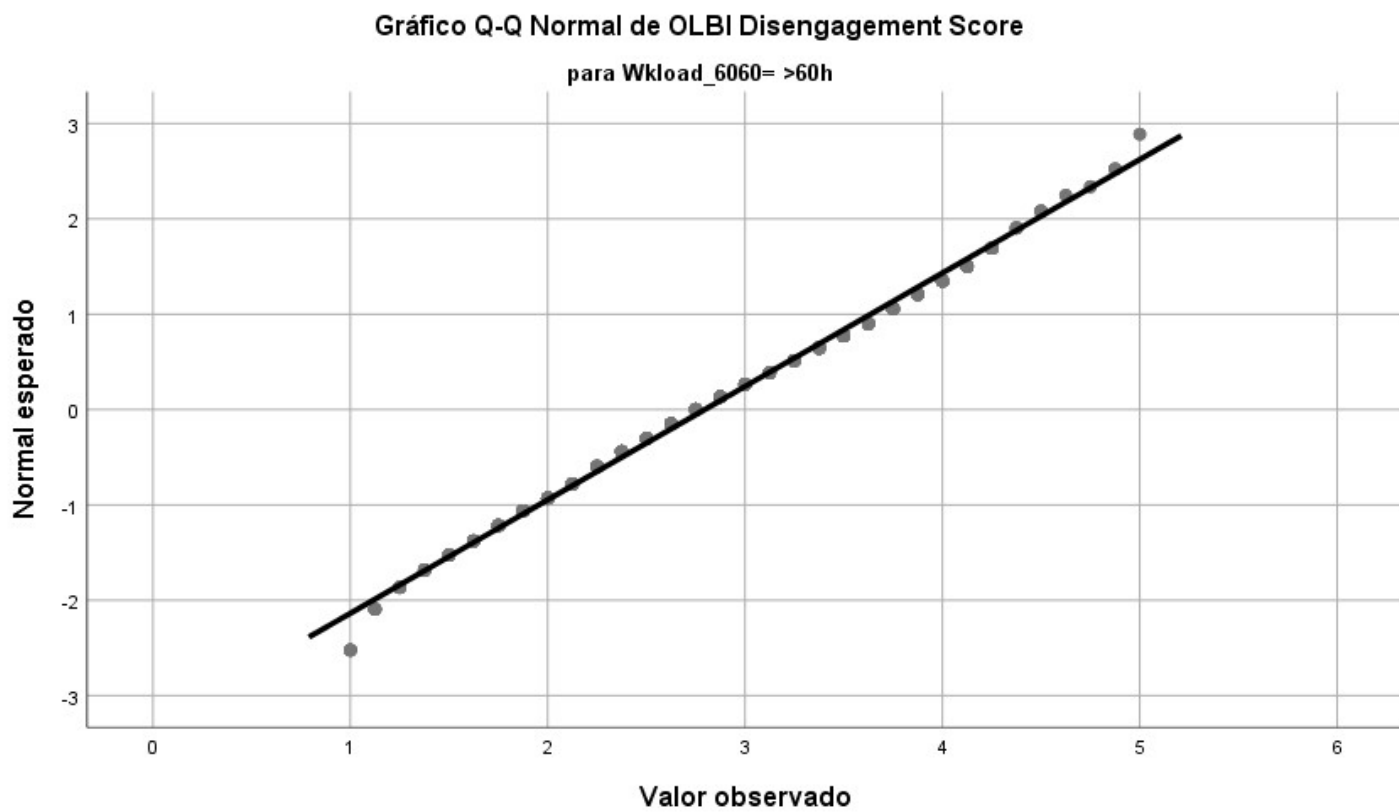

Gráfico Q-Q normais sem tendência

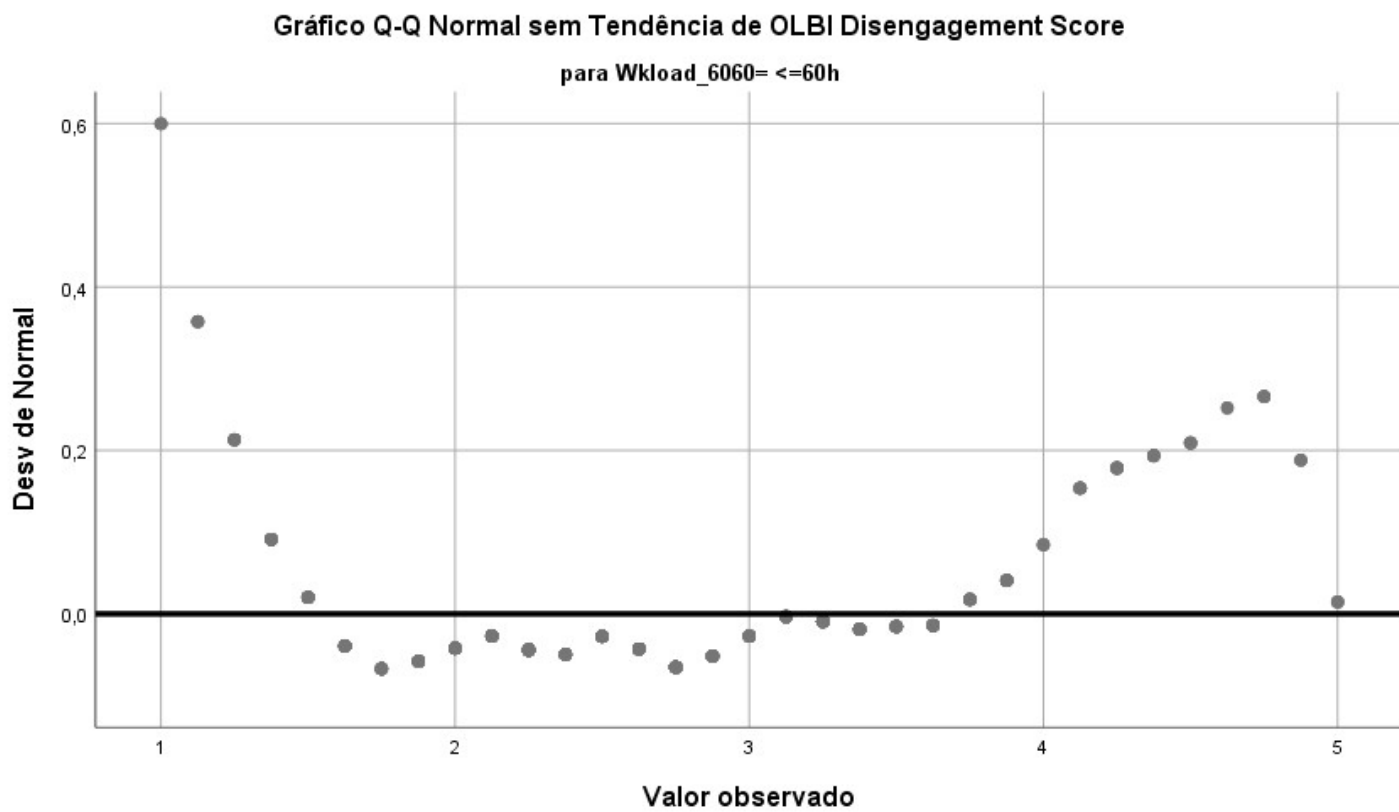

### Gráfico Q-Q Normal sem Tendência de OLBI Disengagement Score

para Wkload\_6060= >60h

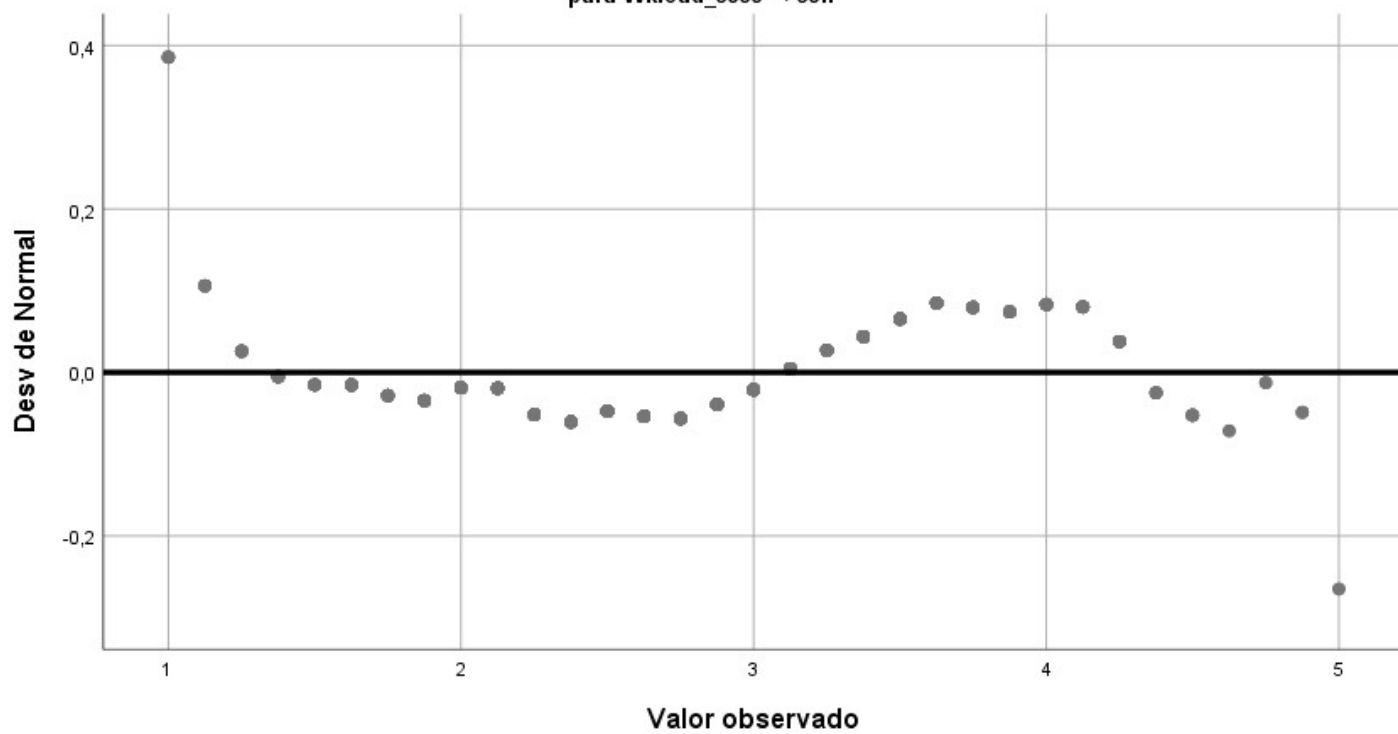

OLBI Exhaustion Score

Histogramas

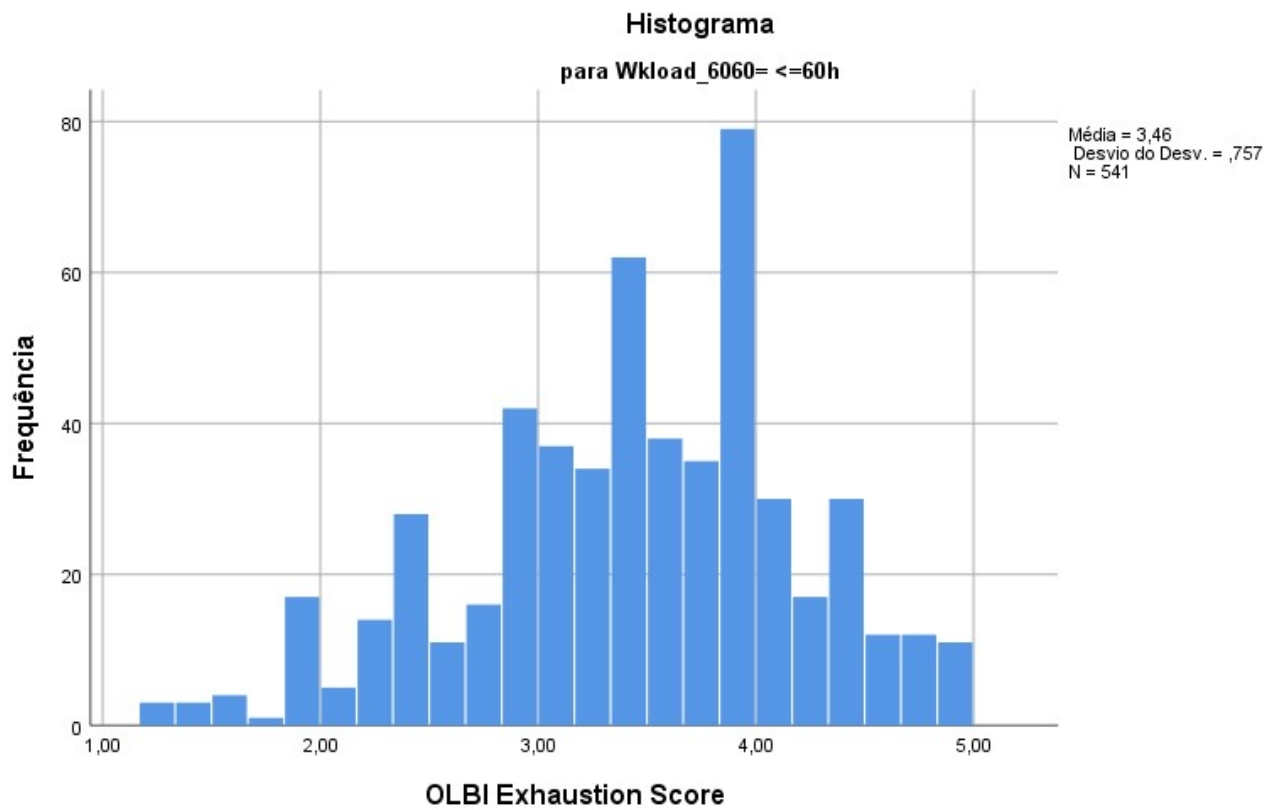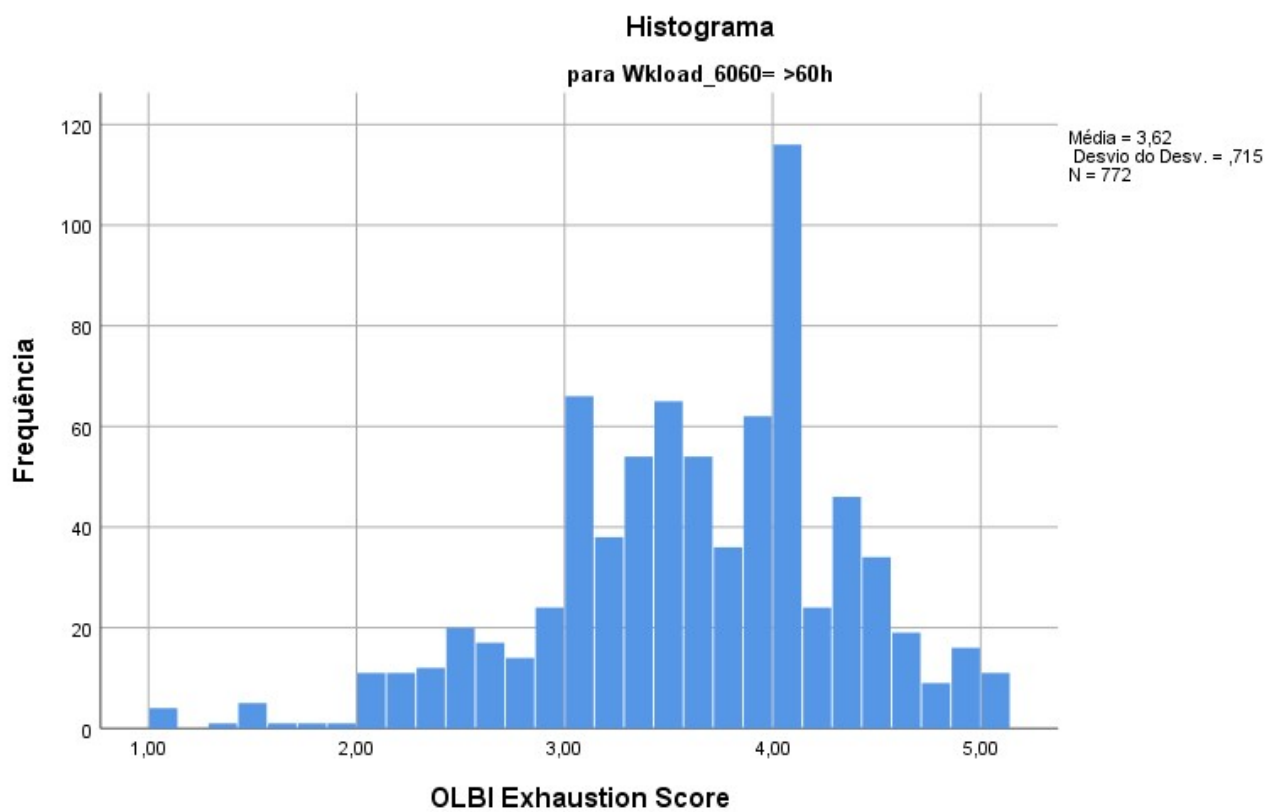

Gráfico Q-Q normais

Gráfico Q-Q Normal de OLBI Exhaustion Score

para Wkload\_6060= <=60h

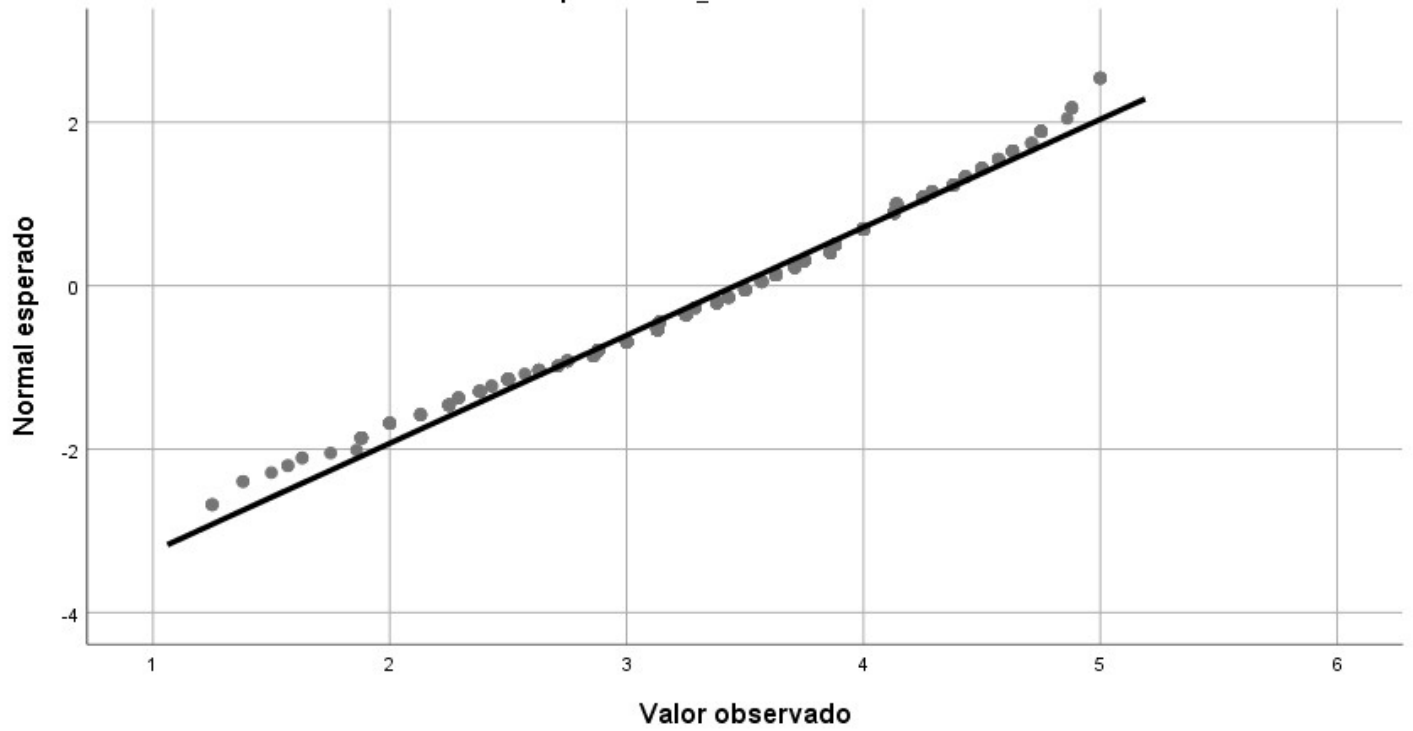

Gráfico Q-Q Normal de OLBI Exhaustion Score

para Wkload\_6060= >60h

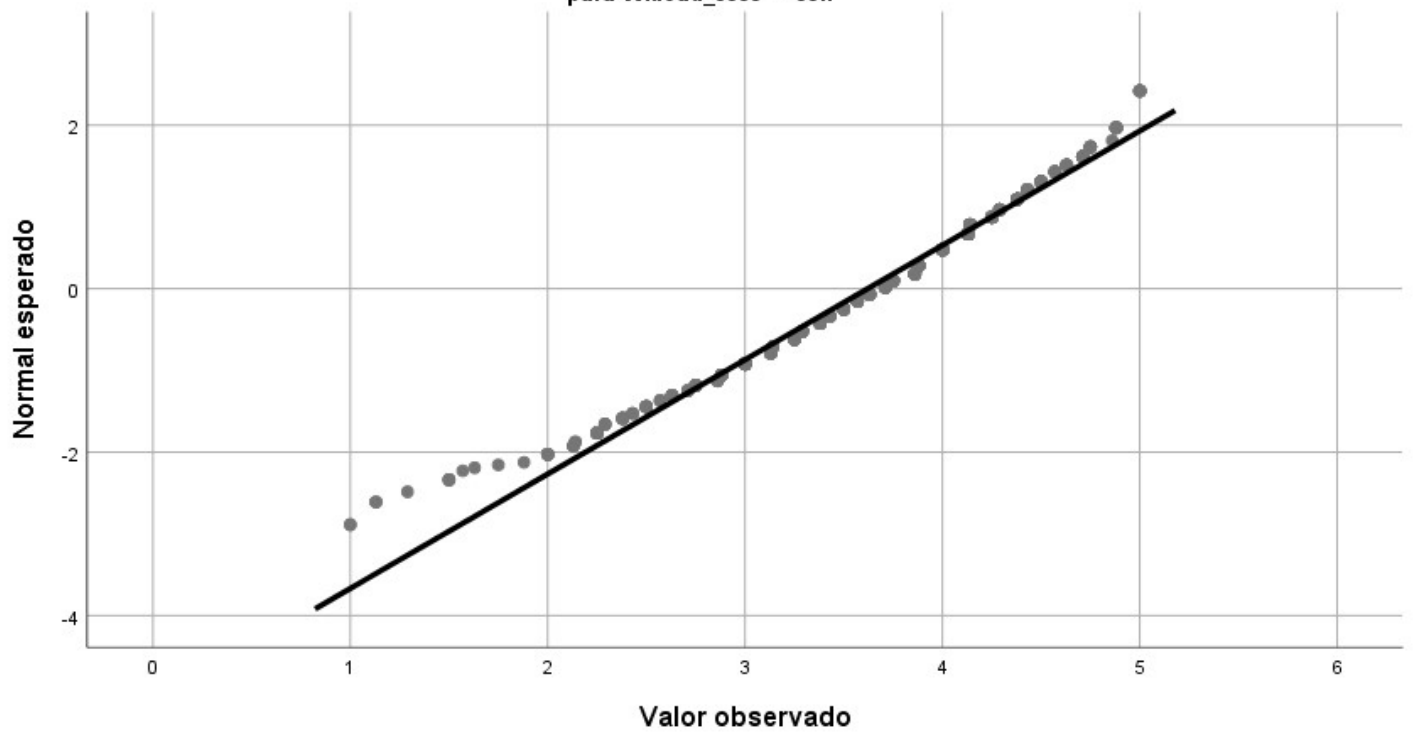

Gráfico Q-Q normais sem tendência

Gráfico Q-Q Normal sem Tendência de OLBI Exhaustion Score

para Wkload\_6060= <=60h

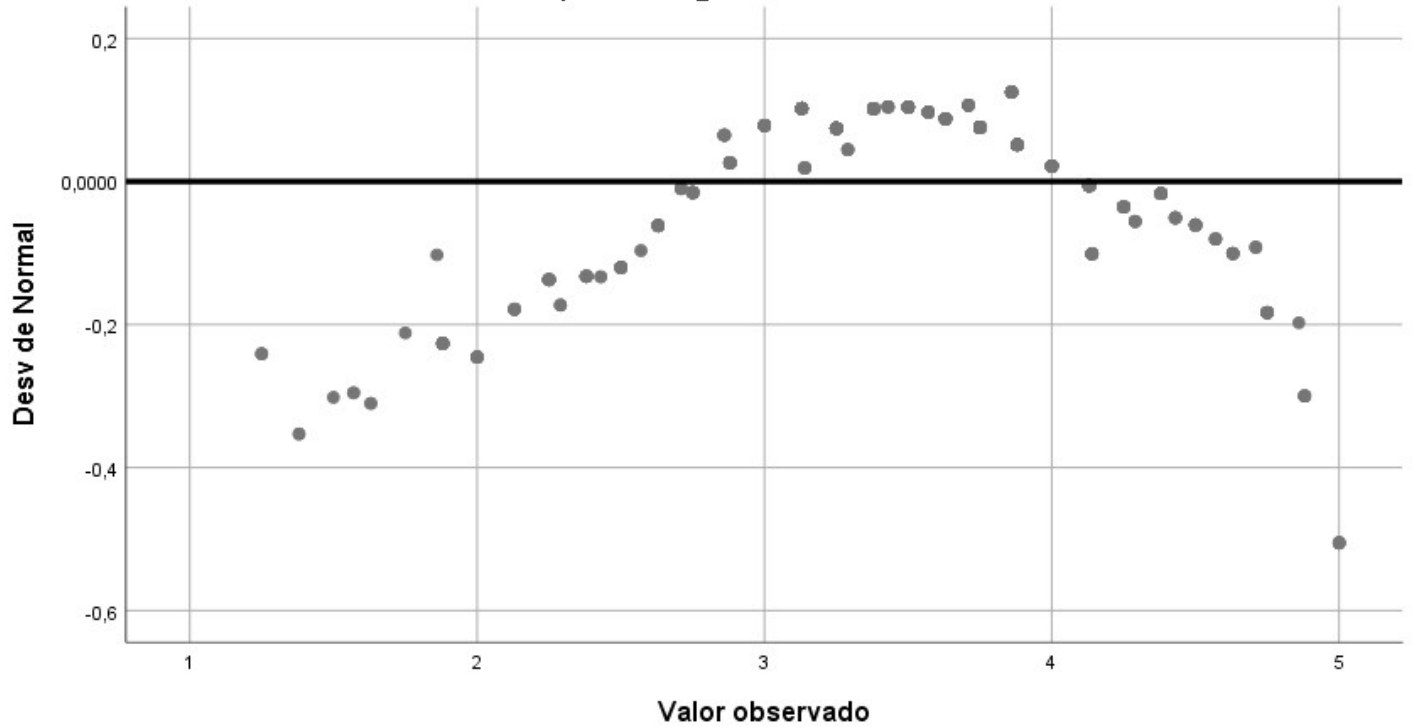

Gráfico Q-Q Normal sem Tendência de OLBI Exhaustion Score

para Wkload\_6060= >60h

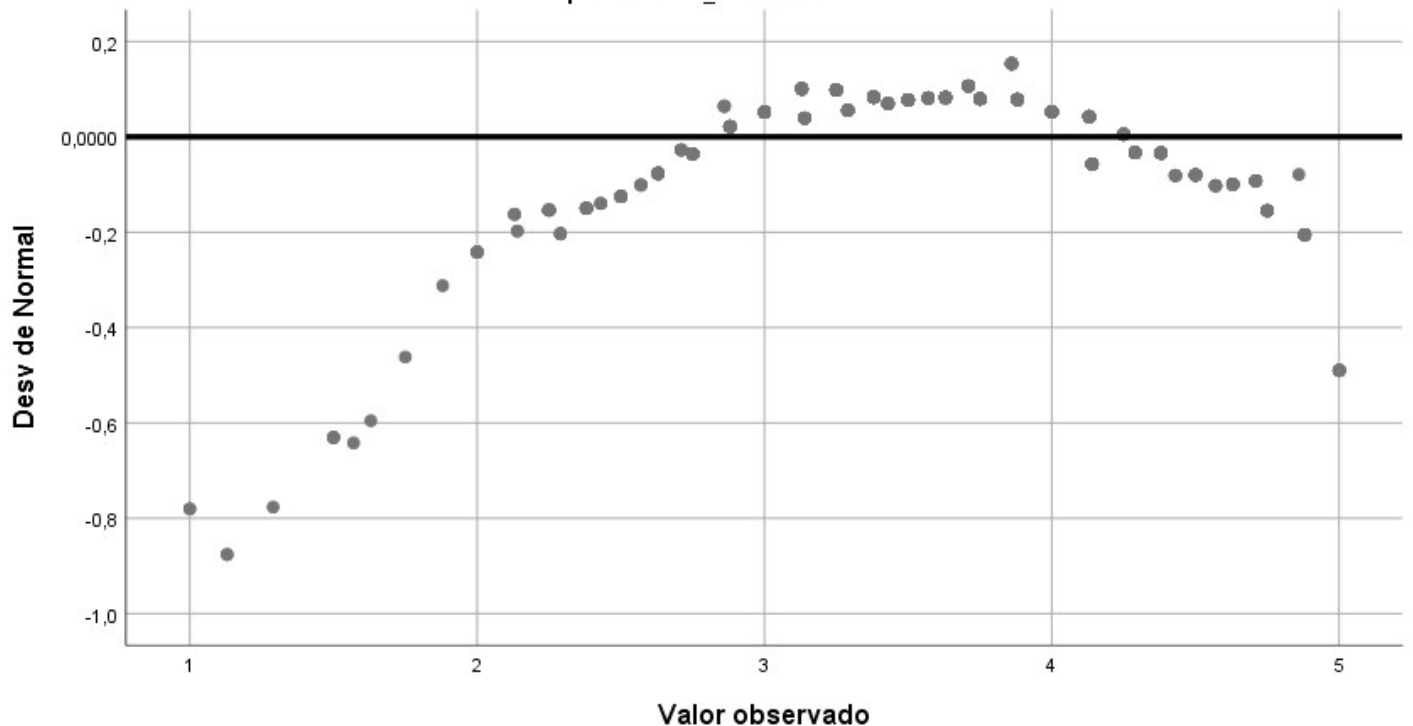

```
EXAMINE VARIABLES=OLBI_D OLBI_E BY Wkload_9090
/PLOT HISTOGRAM NPLOT
/PERCENTILES(5,10,25,50,75,90,95) HAVERAGE
/STATISTICS DESCRIPTIVES
/CINTERVAL 95
/MISSING PAIRWISE
/NOTOTAL.
```

Explorar

| Observações                |                                             |                                                                                                                                                                                                                |
|----------------------------|---------------------------------------------|----------------------------------------------------------------------------------------------------------------------------------------------------------------------------------------------------------------|
| Saída criada               |                                             | 21-SEP-2020 00:12:54                                                                                                                                                                                           |
| Comentários                |                                             |                                                                                                                                                                                                                |
| Entrada                    | Dados                                       | C:\Users\User\Documents\Pesquisa\Fellow\FellowGenData_V1.sav                                                                                                                                                   |
|                            | Conjunto de dados ativo                     | ConjuntodeDados1                                                                                                                                                                                               |
|                            | Filtro                                      | <none>                                                                                                                                                                                                         |
|                            | Ponderação                                  | <none>                                                                                                                                                                                                         |
|                            | Arquivo Dividido                            | <none>                                                                                                                                                                                                         |
|                            | N de linhas em arquivo de dados de trabalho | 1313                                                                                                                                                                                                           |
|                            |                                             |                                                                                                                                                                                                                |
| Tratamento de valor omisso | Definição de omisso                         | Os valores omissos definidos pelo usuário para variáveis dependentes são tratados como omissos.                                                                                                                |
|                            | Casos utilizados                            | As estatísticas são baseadas em casos sem valores omissos para a variável dependente ou fatores que estão sendo analisados.                                                                                    |
| Sintaxe                    |                                             | EXAMINE VARIABLES=OLBI_D<br>OLBI_E BY Wkload_9090<br>/PLOT HISTOGRAM NPLOT<br><br>/PERCENTILES(5,10,25,50,75,90,<br>95) HAVERAGE<br>/STATISTICS DESCRIPTIVES<br>/INTERVAL 95<br>/MISSING PAIRWISE<br>/NOTOTAL. |
| Recursos                   | Tempo do processador                        | 00:00:01,66                                                                                                                                                                                                    |
|                            | Tempo decorrido                             | 00:00:01,65                                                                                                                                                                                                    |

Cumulative weekly workload < or >= 90h (dichotomous)

|                          |       | or >= 90h (dichotomous) |             | Válido |             | Omisso |             | Total |             |
|--------------------------|-------|-------------------------|-------------|--------|-------------|--------|-------------|-------|-------------|
|                          |       | N                       | Porcentagem | N      | Porcentagem | N      | Porcentagem | N     | Porcentagem |
| OLBI Disengagement Score | <=90H | 1223                    | 100,0%      | 0      | 0,0%        | 1223   | 100,0%      |       |             |
|                          | >90H  | 90                      | 100,0%      | 0      | 0,0%        | 90     | 100,0%      |       |             |
| OLBI Exhaustion Score    | <=90H | 1223                    | 100,0%      | 0      | 0,0%        | 1223   | 100,0%      |       |             |
|                          | >90H  | 90                      | 100,0%      | 0      | 0,0%        | 90     | 100,0%      |       |             |

Descritivos

|                          |       | Cumulative weekly workload < or >= 90h (dichotomous) |                 | Estatística | Erro Erro |
|--------------------------|-------|------------------------------------------------------|-----------------|-------------|-----------|
| OLBI Disengagement Score | <=90H | Média                                                |                 | 2,7535      | ,02380    |
|                          |       | 95% Intervalo de Confiança para                      | Limite inferior | 2,7068      |           |
|                          |       | Média                                                | Limite superior | 2,8002      |           |
|                          |       | 5% da média aparada                                  |                 | 2,7423      |           |
|                          |       | Mediana                                              |                 | 2,7500      |           |
|                          |       | Variância                                            |                 | ,693        |           |
|                          |       | Erro Desvio                                          |                 | ,83229      |           |
|                          |       | Mínimo                                               |                 | 1,00        |           |
|                          |       | Máximo                                               |                 | 5,00        |           |
|                          |       | Intervalo                                            |                 | 4,00        |           |
|                          |       | Amplitude interquartil                               |                 | 1,25        |           |
|                          |       | Assimetria                                           |                 | ,190        | ,070      |
|                          |       | Curtose                                              |                 | -,410       | ,140      |
|                          | >90H  | Média                                                |                 | 3,0528      | ,09390    |
|                          |       | 95% Intervalo de Confiança para                      | Limite inferior | 2,8662      |           |
|                          |       | Média                                                | Limite superior | 3,2394      |           |
|                          |       | 5% da média aparada                                  |                 | 3,0525      |           |
|                          |       | Mediana                                              |                 | 3,0000      |           |
|                          |       | Variância                                            |                 | ,794        |           |
|                          |       | Erro Desvio                                          |                 | ,89080      |           |
|                          |       | Mínimo                                               |                 | 1,25        |           |
|                          |       | Máximo                                               |                 | 4,88        |           |
|                          |       | Intervalo                                            |                 | 3,63        |           |
|                          |       | Amplitude interquartil                               |                 | 1,38        |           |
|                          |       | Assimetria                                           |                 | ,024        | ,254      |
|                          |       | Curtose                                              |                 | -,601       | ,503      |
| OLBI Exhaustion Score    | <=90H | Média                                                |                 | 3,5357      | ,02096    |
|                          |       | 95% Intervalo de Confiança para                      | Limite inferior | 3,4946      |           |
|                          |       | Média                                                | Limite superior | 3,5768      |           |
|                          |       | 5% da média aparada                                  |                 | 3,5582      |           |
|                          |       | Mediana                                              |                 | 3,6300      |           |
|                          |       | Variância                                            |                 | ,537        |           |
|                          |       | Erro Desvio                                          |                 | ,73297      |           |
|                          |       | Mínimo                                               |                 | 1,00        |           |
|                          |       | Máximo                                               |                 | 5,00        |           |

|         |                                 |                 |        |
|---------|---------------------------------|-----------------|--------|
| 90H     | Intervalo                       | 4,00            |        |
|         | Amplitude interquartil          | ,87             |        |
|         | Assimetria                      | -,506           | ,070   |
|         | Curtose                         | ,191            | ,140   |
|         | Média                           | 3,8119          | ,07764 |
|         | 95% Intervalo de Confiança para | Limite inferior | 3,6576 |
|         | Média                           | Limite superior | 3,9662 |
|         | 5% da média aparada             | 3,8510          |        |
|         | Mediana                         | 3,9400          |        |
|         | Variância                       | ,543            |        |
|         | Erro Desvio                     | ,73658          |        |
|         | Mínimo                          | 1,13            |        |
|         | Máximo                          | 5,00            |        |
|         | Intervalo                       | 3,87            |        |
|         | Amplitude interquartil          | 1,00            |        |
|         | Assimetria                      | -,947           | ,254   |
| Curtose | 1,443                           | ,503            |        |

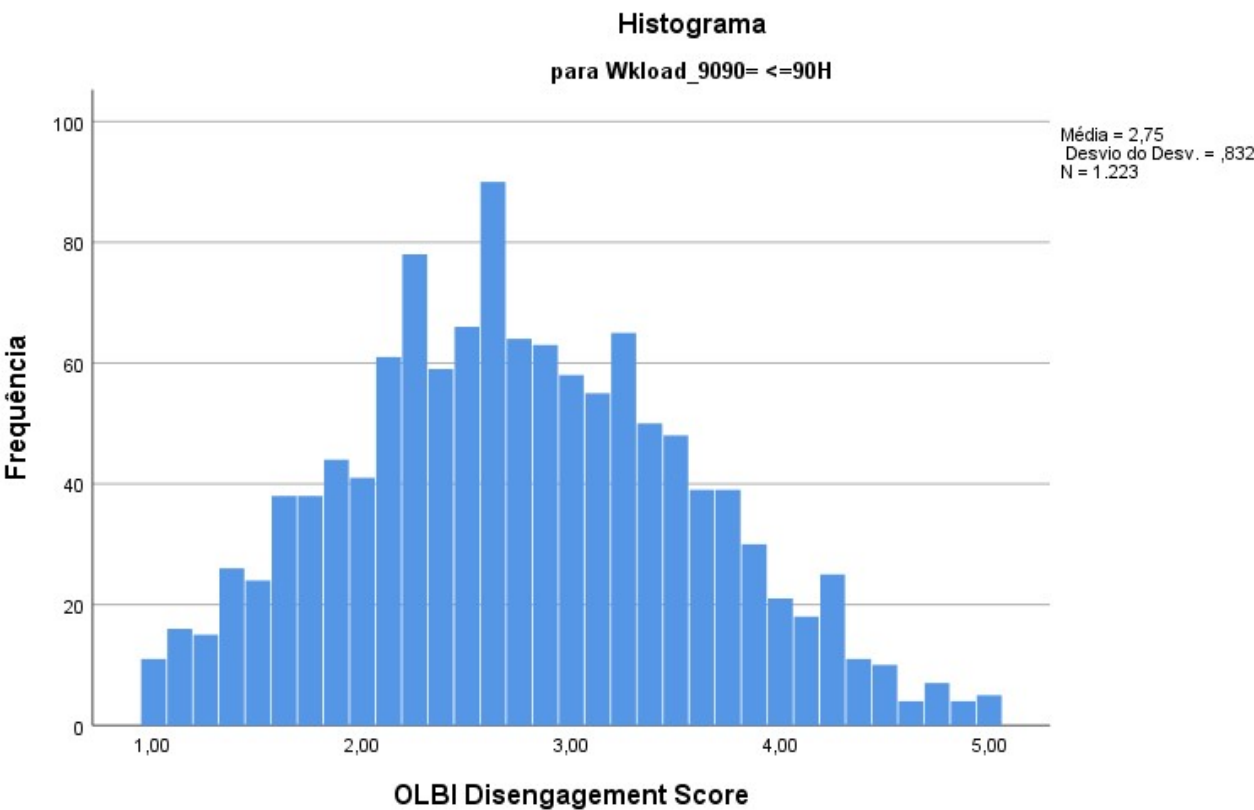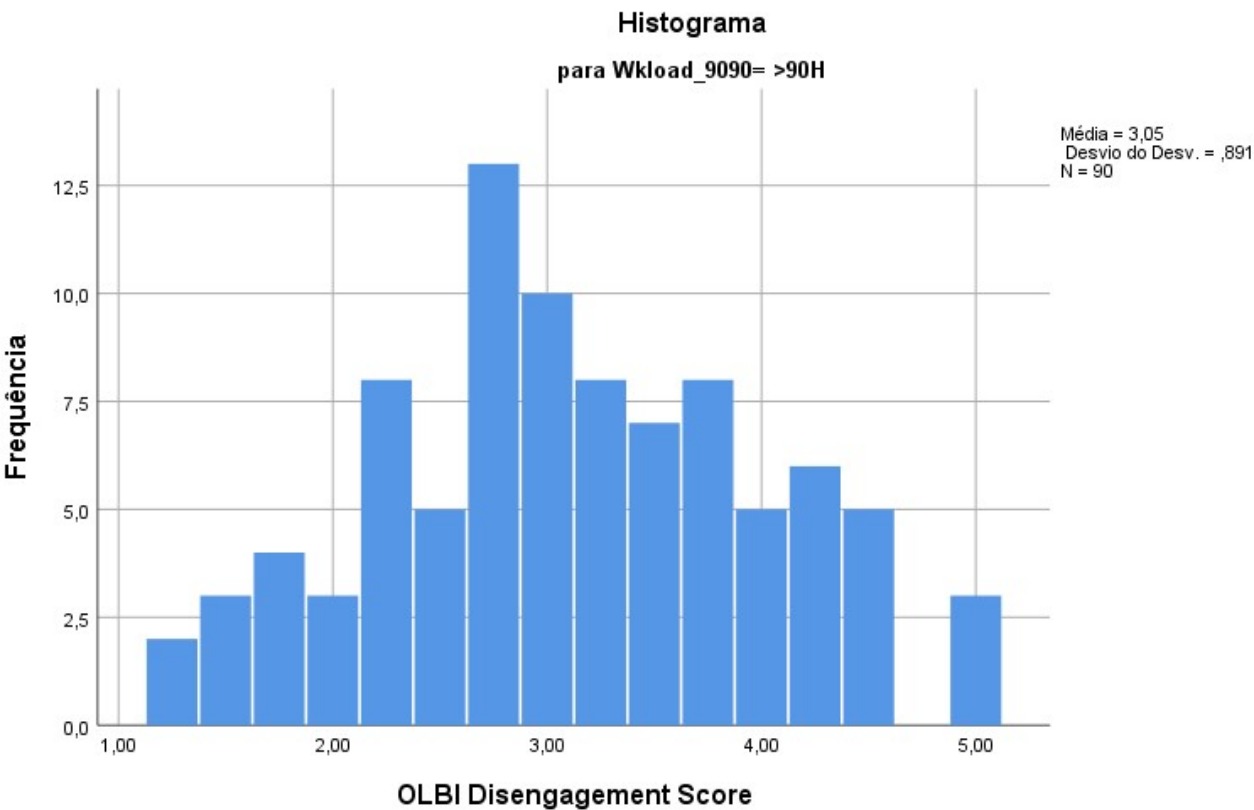

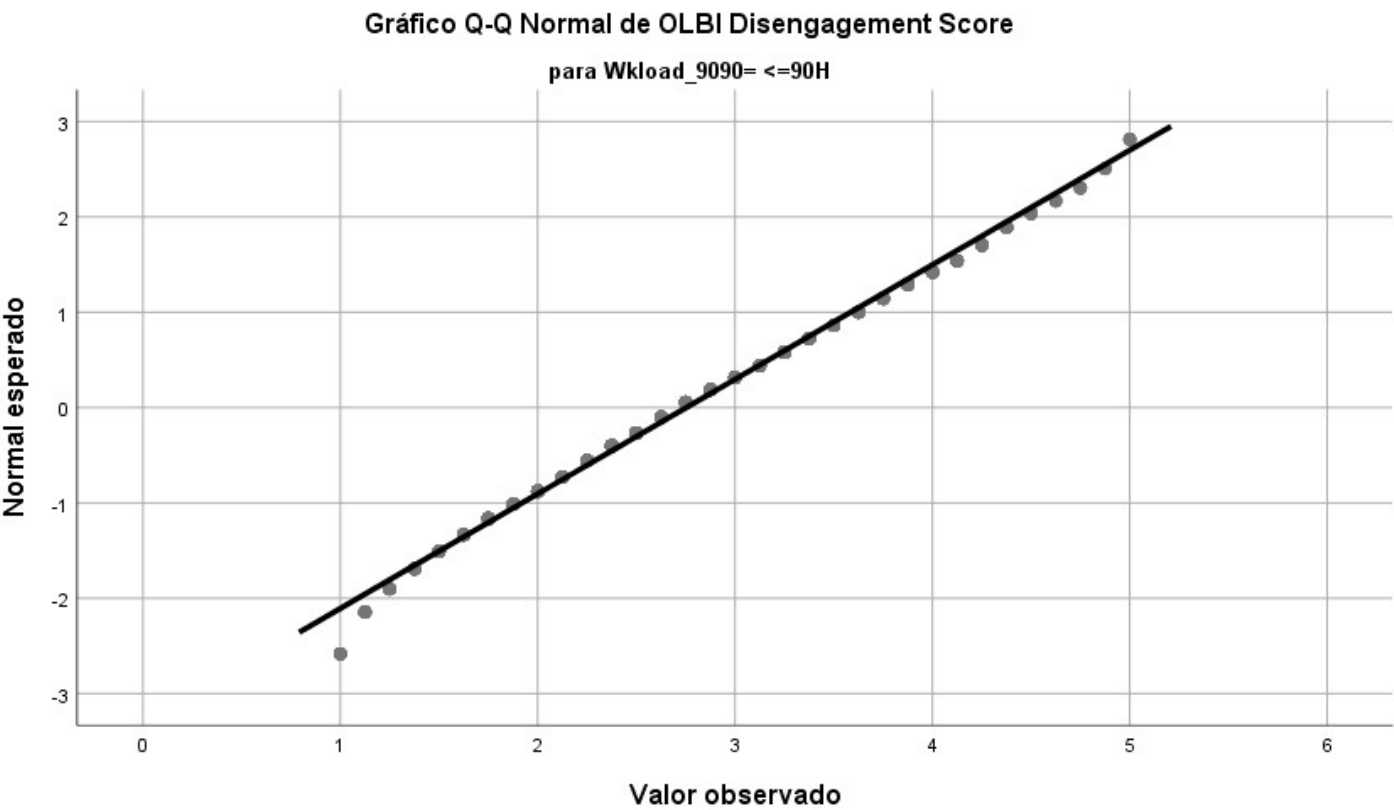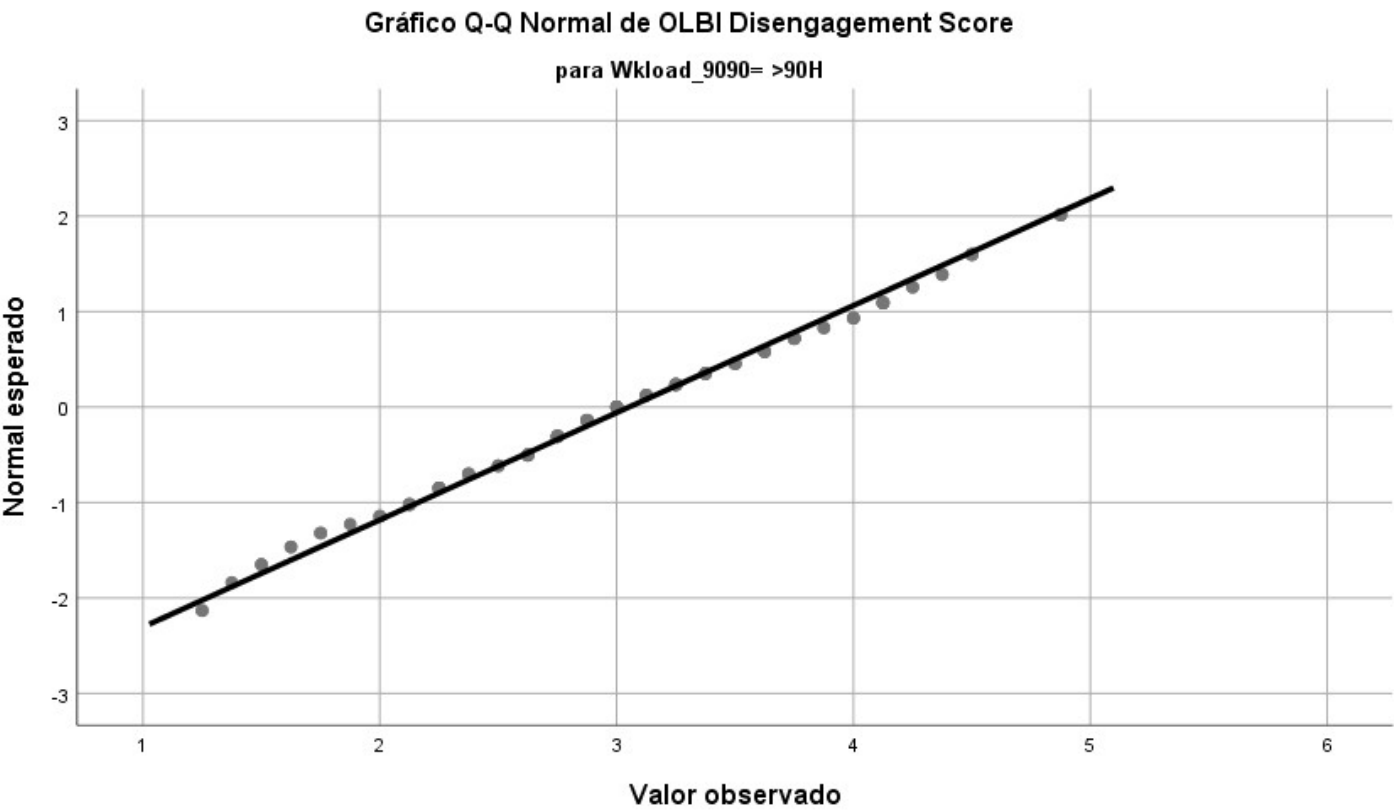

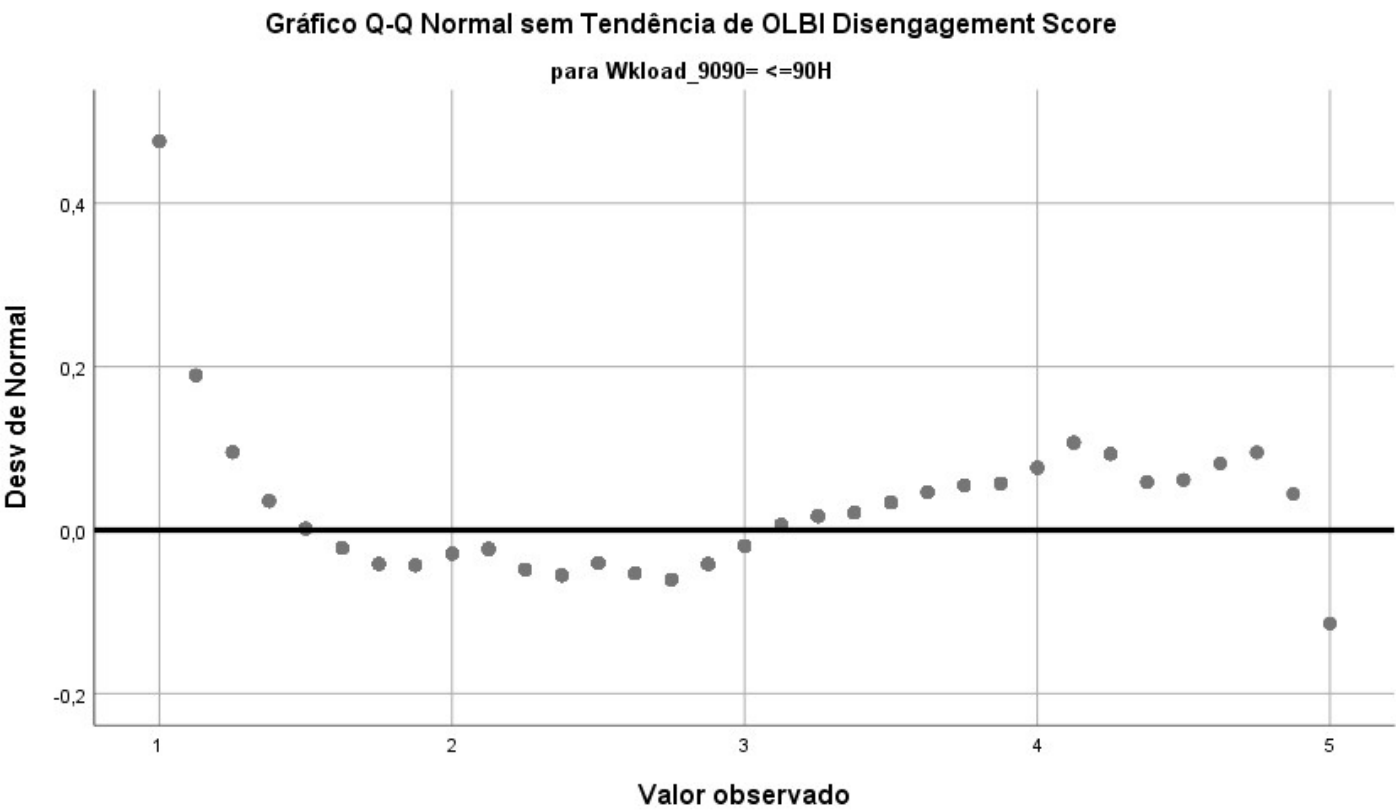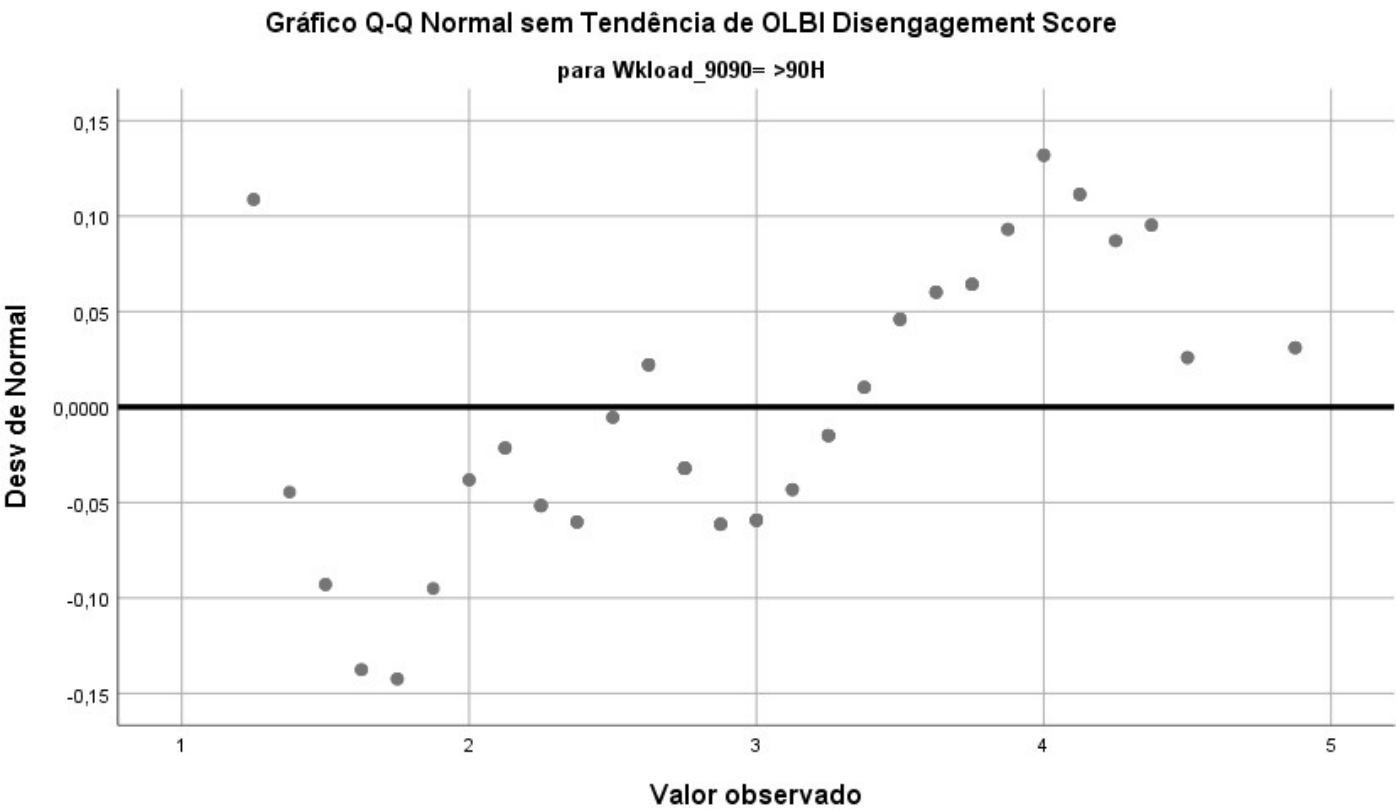

OLBI Exhaustion Score

Histogramas

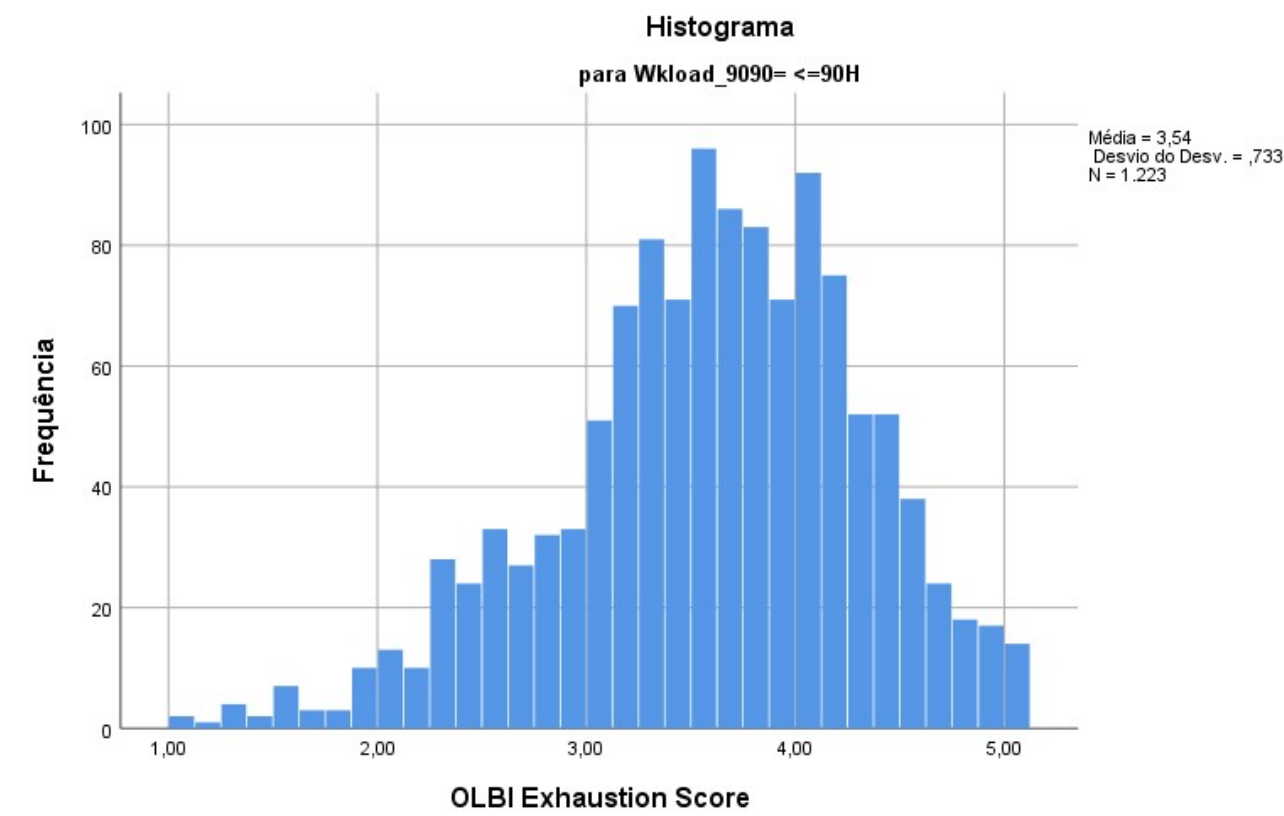

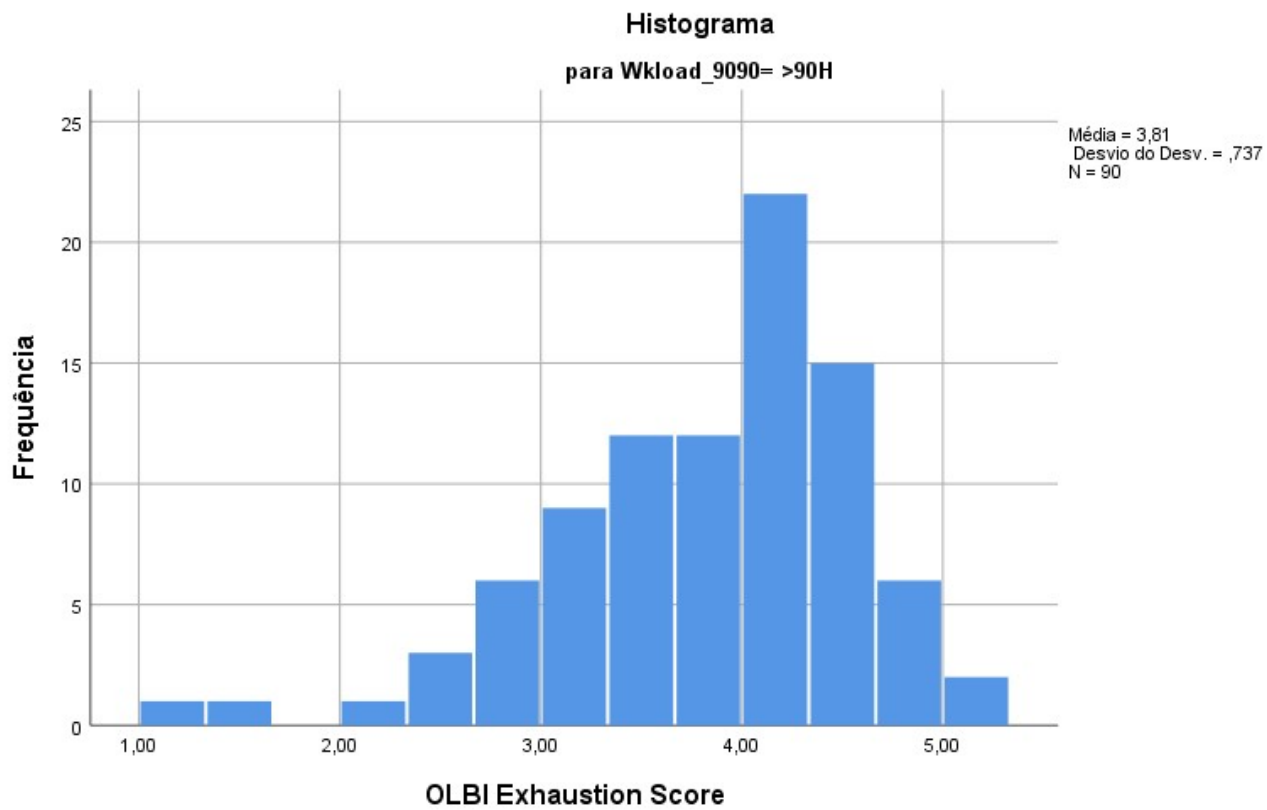

Gráfico Q-Q normais

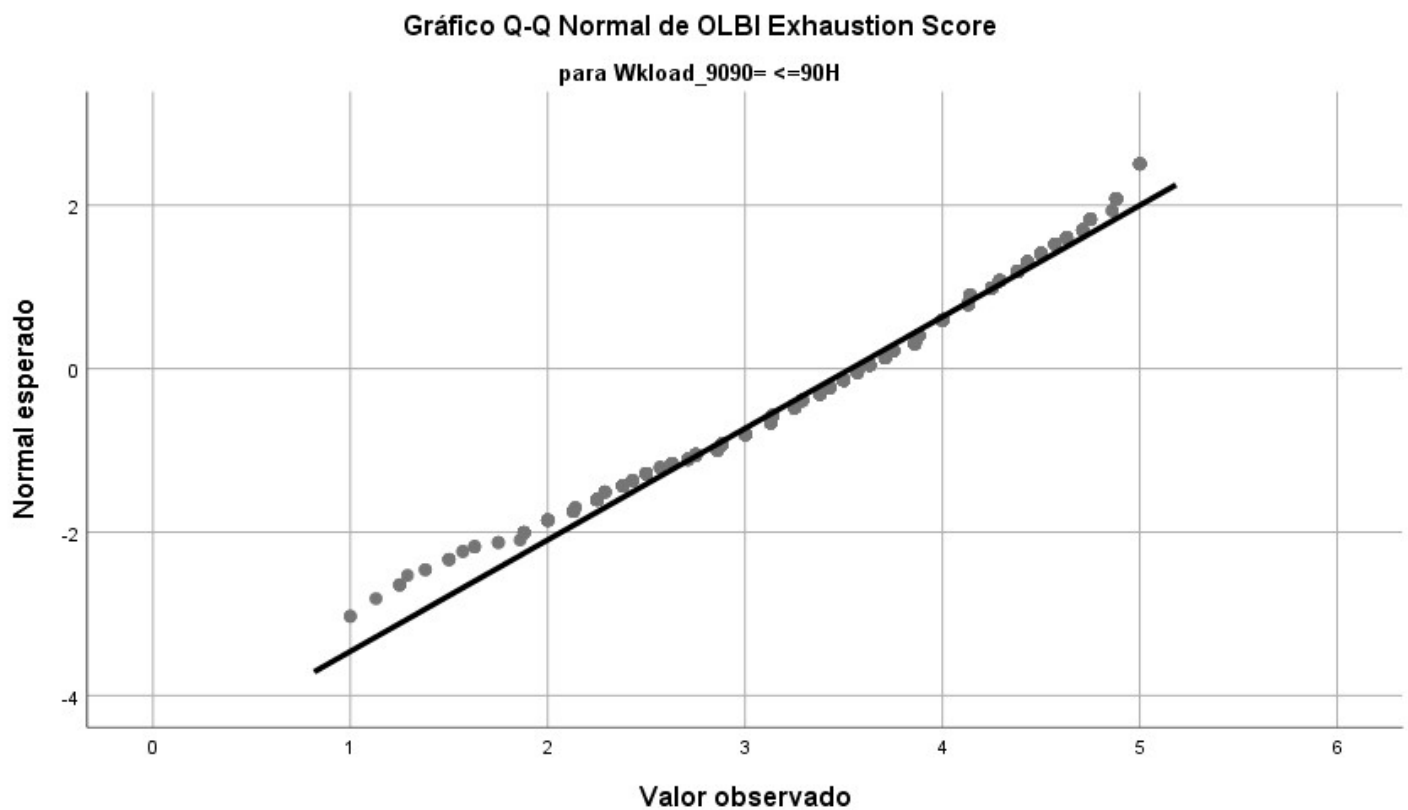

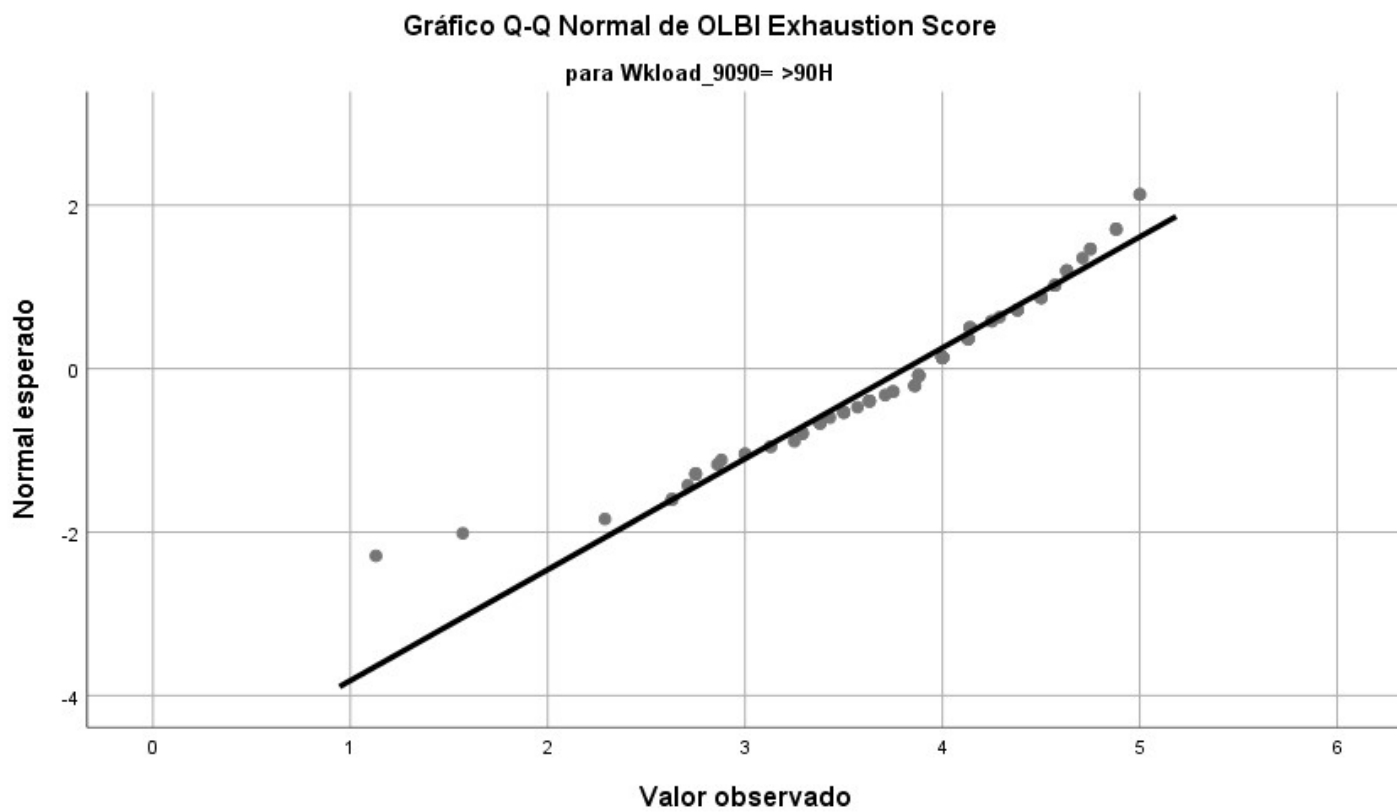

Gráfico Q-Q normais sem tendência

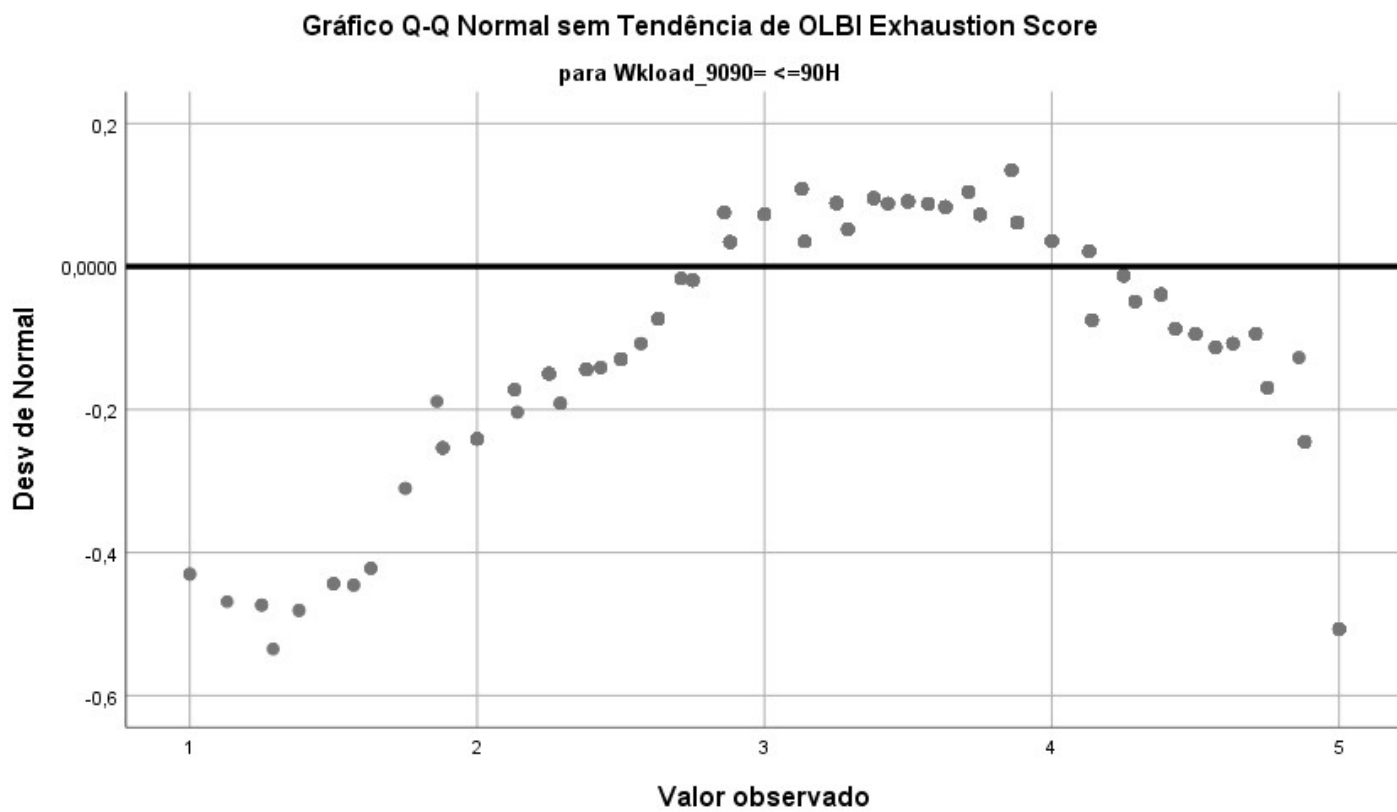

### Gráfico Q-Q Normal sem Tendência de OLBI Exhaustion Score

para Wkload\_9090= >90H

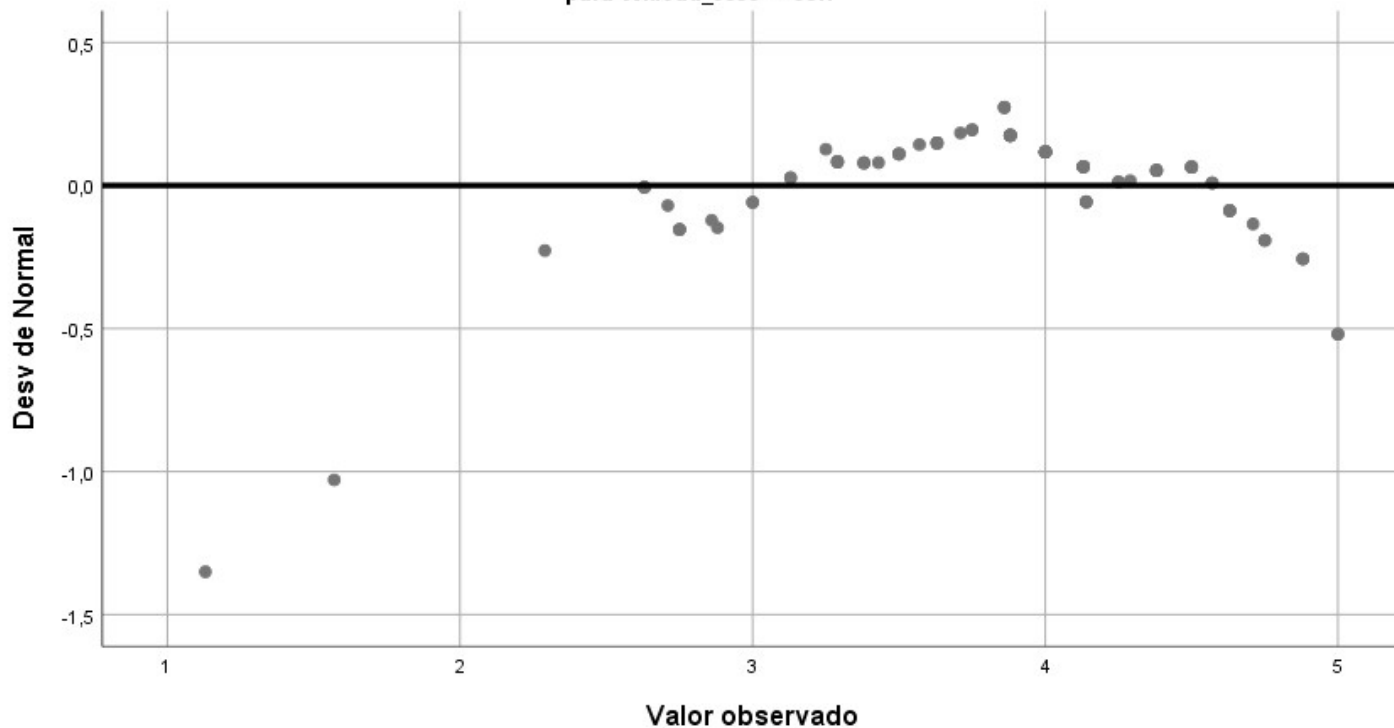

\*Nonparametric Tests: Independent Samples.

NPTESTS

/INDEPENDENT TEST (OLBI\_D OLBI\_E) GROUP (Sex)

/MISSING SCOPE=ANALYSIS USERMISSING=EXCLUDE

/CRITERIA ALPHA=0.05 CILEVEL=95.

Testes não paramétricos

### Observações

|              |                                             |                                                              |
|--------------|---------------------------------------------|--------------------------------------------------------------|
| Saída criada |                                             | 21-SEP-2020 00:14:31                                         |
| Comentários  |                                             |                                                              |
| Entrada      | Dados                                       | C:\Users\User\Documents\Pesquisa\Fellow\FellowGenData_V1.sav |
|              | Conjunto de dados ativo                     | ConjuntodeDados1                                             |
|              | Filtro                                      | <none>                                                       |
|              | Ponderação                                  | <none>                                                       |
|              | Arquivo Dividido                            | <none>                                                       |
|              | N de linhas em arquivo de dados de trabalho | 1313                                                         |
|              |                                             |                                                              |

Sintaxe

NPTESTS  
/INDEPENDENT TEST (OLBI\_D  
OLBI\_E) GROUP (Sex)  
/MISSING SCOPE=ANALYSIS  
USERMISSING=EXCLUDE  
/CRITERIA ALPHA=0.05  
CILEVEL=95.

Recursos

Tempo do processador

00:00:00,17

Tempo decorrido

00:00:00,12

null : null

### Resumo de Teste de Hipótese

|   | Hipótese nula                                                                    | Teste                                             | Sig. | Decisão                   |
|---|----------------------------------------------------------------------------------|---------------------------------------------------|------|---------------------------|
| 1 | A distribuição de OLBI Disengagement Score é a mesma entre as categorias de Sex. | Teste U de Mann-Whitney de amostras independentes | ,154 | Reter a hipótese nula.    |
| 2 | A distribuição de OLBI Exhaustion Score é a mesma entre as categorias de Sex.    | Teste U de Mann-Whitney de amostras independentes | ,000 | Rejeitar a hipótese nula. |

São exibidas significâncias assintóticas. O nível de significância é ,05.

## Teste U de Mann-Whitney de amostras independentes

Sex

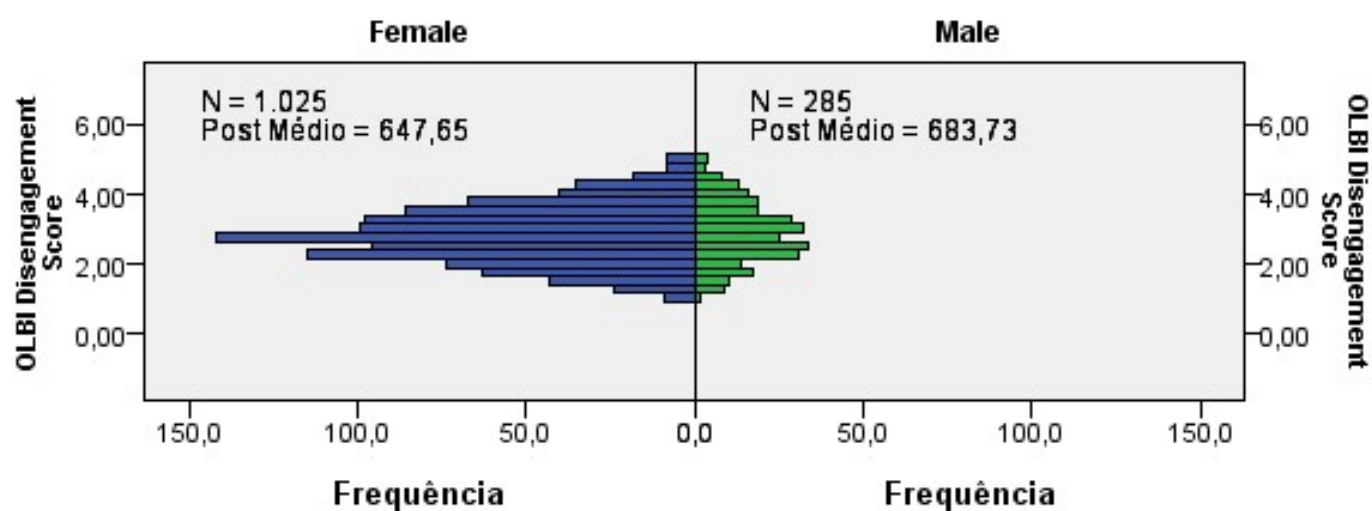

|                                            |             |
|--------------------------------------------|-------------|
| <b>N total</b>                             | 1.310       |
| <b>U de Mann-Whitney</b>                   | 138.018,000 |
| <b>Wilcoxon W</b>                          | 663.843,000 |
| <b>Estatística de teste</b>                | 138.018,000 |
| <b>Erro padrão</b>                         | 5.643,561   |
| <b>Estatística de Teste Padronizado</b>    | -1,425      |
| <b>Sig. assintótico (teste de 2 lados)</b> | ,154        |

## Teste U de Mann-Whitney de amostras independentes

Sex

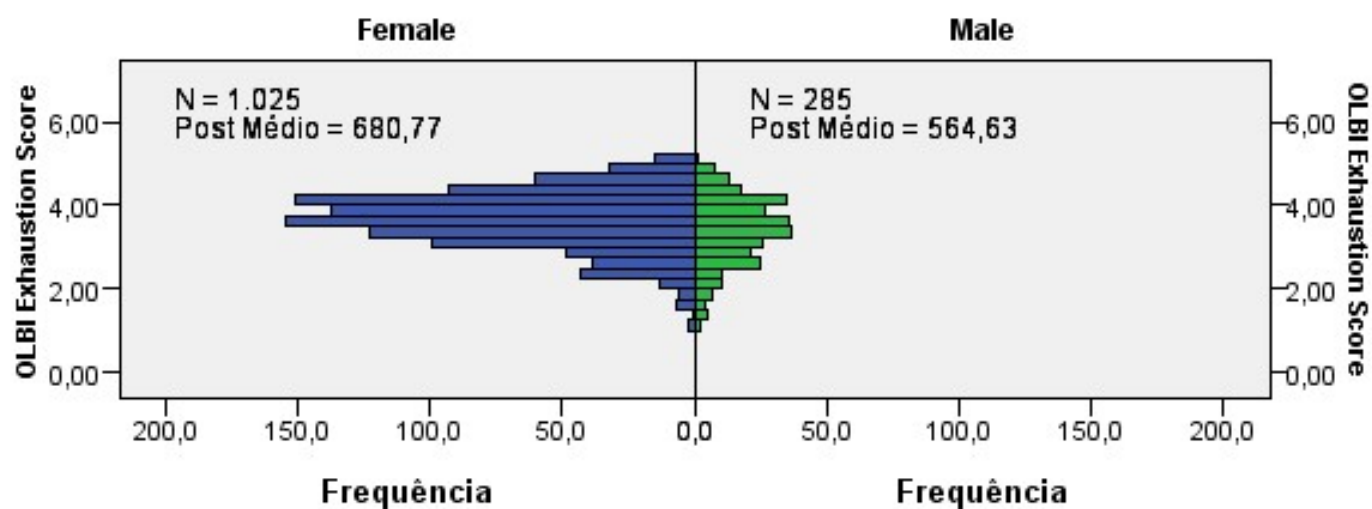

|                                     |             |
|-------------------------------------|-------------|
| N total                             | 1.310       |
| U de Mann-Whitney                   | 171.960,500 |
| Wilcoxon W                          | 697.785,500 |
| Estatística de teste                | 171.960,500 |
| Erro padrão                         | 5.644,152   |
| Estatística de Teste Padronizado    | 4,588       |
| Sig. assintótico (teste de 2 lados) | ,000        |

CROSSTABS

/TABLES=Sex BY Wkload\_5P Wkload\_6060 Wkload\_9090

/FORMAT=AVALUE TABLES

/STATISTICS=CHISQ PHI RISK

/CELLS=COUNT ROW TOTAL

/COUNT ROUND CELL.

## Observações

|                             |                                             |                                                                                                                                                                         |
|-----------------------------|---------------------------------------------|-------------------------------------------------------------------------------------------------------------------------------------------------------------------------|
| Saída criada                |                                             | 21-SEP-2020 00:18:27                                                                                                                                                    |
| Comentários                 |                                             |                                                                                                                                                                         |
| Entrada                     | Dados                                       | C:\Users\User\Documents\Pesquisa\Fellow\FellowGenData_V1.sav                                                                                                            |
|                             | Conjunto de dados ativo                     | ConjuntodeDados1                                                                                                                                                        |
|                             | Filtro                                      | <none>                                                                                                                                                                  |
|                             | Ponderação                                  | <none>                                                                                                                                                                  |
|                             | Arquivo Dividido                            | <none>                                                                                                                                                                  |
|                             | N de linhas em arquivo de dados de trabalho | 1313                                                                                                                                                                    |
|                             |                                             |                                                                                                                                                                         |
| Tratamento de valor omissos | Definição de omissos                        | Os valores omissos definidos pelo usuário são tratados como omissos.                                                                                                    |
|                             | Casos utilizados                            | As estatísticas de cada tabela são baseadas em todos os casos com dados válidos na(s) amplitude(s) especificada(s) para todas as variáveis de cada tabela.              |
| Sintaxe                     |                                             | CROSSTABS<br>/TABLES=Sex BY Wkload_5P<br>Wkload_6060 Wkload_9090<br>/FORMAT=AVALUE TABLES<br>/STATISTICS=CHISQ PHI RISK<br>/CELLS=COUNT ROW TOTAL<br>/COUNT ROUND CELL. |
| Recursos                    | Tempo do processador                        | 00:00:00,02                                                                                                                                                             |
|                             | Tempo decorrido                             | 00:00:00,02                                                                                                                                                             |
|                             | Dimensões solicitadas                       | 2                                                                                                                                                                       |
|                             | Células disponíveis                         | 524245                                                                                                                                                                  |

Sex \* Cumulative weekly workload (five categories)

## Crosstab

|     |        | Cumulative weekly workload (five categories) |              |              |               |       | Total  |
|-----|--------|----------------------------------------------|--------------|--------------|---------------|-------|--------|
|     |        | --- 24h                                      | >24h --- 60h | >60h --- 90h | >90h --- 120h | >120h |        |
| Sex | Male   | Contagem                                     | 1            | 99           | 152           | 28    | 285    |
|     |        | % em Sex                                     | 0,4%         | 34,7%        | 53,3%         | 9,8%  | 100,0% |
|     |        | % do Total                                   | 0,1%         | 7,6%         | 11,6%         | 2,1%  | 21,8%  |
|     | Female | Contagem                                     | 10           | 430          | 528           | 53    | 1025   |
|     |        | % em Sex                                     | 1,0%         | 42,0%        | 51,5%         | 5,2%  | 100,0% |

|       |            |      |       |       |      |      |        |
|-------|------------|------|-------|-------|------|------|--------|
|       | % do Total | 0,8% | 32,8% | 40,3% | 4,0% | 0,3% | 78,2%  |
| Total | Contagem   | 11   | 529   | 680   | 81   | 9    | 1310   |
|       | % em Sex   | 0,8% | 40,4% | 51,9% | 6,2% | 0,7% | 100,0% |
|       | % do Total | 0,8% | 40,4% | 51,9% | 6,2% | 0,7% | 100,0% |

### Testes qui-quadrado

|                              | Valor               | gl | Significância Assintótica (Bilateral) |
|------------------------------|---------------------|----|---------------------------------------|
| Qui-quadrado de Pearson      | 17,904 <sup>a</sup> | 4  | ,001                                  |
| Razão de verossimilhança     | 16,202              | 4  | ,003                                  |
| Associação Linear por Linear | 13,725              | 1  | ,000                                  |
| N de Casos Válidos           | 1310                |    |                                       |

a. 2 células (20,0%) esperavam uma contagem menor que 5. A contagem mínima esperada é 1,96.

### Medidas Simétricas

|                     |             | Valor | Significância Aproximada |
|---------------------|-------------|-------|--------------------------|
| Nominal por Nominal | Fi          | ,117  | ,001                     |
|                     | V de Cramer | ,117  | ,001                     |
| N de Casos Válidos  |             | 1310  |                          |

### Estimativa de Risco

|                                           | Valor        |
|-------------------------------------------|--------------|
| Razão de Chances para Sex (Male / Female) | <sup>a</sup> |

a. Não é possível calcular as estatísticas de Estimativa de Risco. Elas são computadas apenas para uma tabela 2\*2 sem células vazias.

Sex \* Cumulative weekly workload < or >= 60h (dichotomous)

### Crosstab

|     |      |          | Cumulative weekly workload < or >= 60h (dichotomous) |       | Total  |
|-----|------|----------|------------------------------------------------------|-------|--------|
|     |      |          | <=60h                                                | >60h  |        |
| Sex | Male | Contagem | 100                                                  | 185   | 285    |
|     |      | % em Sex | 35,1%                                                | 64,9% | 100,0% |

|        |            |       |       |        |
|--------|------------|-------|-------|--------|
|        | % do Total | 7,6%  | 14,1% | 21,8%  |
| Female | Contagem   | 440   | 585   | 1025   |
|        | % em Sex   | 42,9% | 57,1% | 100,0% |
|        | % do Total | 33,6% | 44,7% | 78,2%  |
| Total  | Contagem   | 540   | 770   | 1310   |
|        | % em Sex   | 41,2% | 58,8% | 100,0% |
|        | % do Total | 41,2% | 58,8% | 100,0% |

### Testes qui-quadrado

|                                       | Valor              | gl | Significância<br>Assintótica<br>(Bilateral) | Sig exata (2 lados) | Sig exata (1 lado) |
|---------------------------------------|--------------------|----|---------------------------------------------|---------------------|--------------------|
| Qui-quadrado de Pearson               | 5,656 <sup>a</sup> | 1  | ,017                                        |                     |                    |
| Correção de continuidade <sup>b</sup> | 5,337              | 1  | ,021                                        |                     |                    |
| Razão de verossimilhança              | 5,730              | 1  | ,017                                        |                     |                    |
| Teste Exato de Fisher                 |                    |    |                                             | ,017                | ,010               |
| Associação Linear por Linear          | 5,651              | 1  | ,017                                        |                     |                    |
| N de Casos Válidos                    | 1310               |    |                                             |                     |                    |

a. 0 células (,0%) esperavam uma contagem menor que 5. A contagem mínima esperada é 117,48.

b. Computado apenas para uma tabela 2x2

### Medidas Simétricas

|                     |             | Valor | Significância<br>Aproximada |
|---------------------|-------------|-------|-----------------------------|
| Nominal por Nominal | Fi          | -,066 | ,017                        |
|                     | V de Cramer | ,066  | ,017                        |
| N de Casos Válidos  |             | 1310  |                             |

### Estimativa de Risco

|                                                                               | Valor | Intervalo de confiança de 95% |          |
|-------------------------------------------------------------------------------|-------|-------------------------------|----------|
|                                                                               |       | Inferior                      | Superior |
| Razão de Chances para Sex<br>(Male / Female)                                  | ,719  | ,547                          | ,944     |
| Para grupo Cumulative weekly<br>workload < or >= 60h<br>(dichotomous) = <=60h | ,817  | ,688                          | ,972     |
| Para grupo Cumulative weekly<br>workload < or >= 60h<br>(dichotomous) = >60h  | 1,137 | 1,029                         | 1,258    |
| N de Casos Válidos                                                            | 1310  |                               |          |

Sex \* Cumulative weekly workload < or >= 90h (dichotomous)

### Crosstab

Cumulative weekly workload < or >= 90h  
(dichotomous)

|       |        |            | <=90H      | >90H  | Total  |        |
|-------|--------|------------|------------|-------|--------|--------|
| Sex   | Male   | Contagem   | 252        | 33    | 285    |        |
|       |        | % em Sex   | 88,4%      | 11,6% | 100,0% |        |
|       |        | % do Total | 19,2%      | 2,5%  | 21,8%  |        |
|       | Female | Contagem   | 968        | 57    | 1025   |        |
|       |        | % em Sex   | 94,4%      | 5,6%  | 100,0% |        |
|       |        | % do Total | 73,9%      | 4,4%  | 78,2%  |        |
| Total |        |            | Contagem   | 1220  | 90     | 1310   |
|       |        |            | % em Sex   | 93,1% | 6,9%   | 100,0% |
|       |        |            | % do Total | 93,1% | 6,9%   | 100,0% |

### Testes qui-quadrado

|                                       | Valor               | gl | Significância<br>Assintótica<br>(Bilateral) | Sig exata (2 lados) | Sig exata (1 lado) |
|---------------------------------------|---------------------|----|---------------------------------------------|---------------------|--------------------|
| Qui-quadrado de Pearson               | 12,622 <sup>a</sup> | 1  | ,000                                        |                     |                    |
| Correção de continuidade <sup>b</sup> | 11,699              | 1  | ,001                                        |                     |                    |
| Razão de verossimilhança              | 11,227              | 1  | ,001                                        |                     |                    |
| Teste Exato de Fisher                 |                     |    |                                             | ,001                | ,001               |
| Associação Linear por Linear          | 12,613              | 1  | ,000                                        |                     |                    |
| N de Casos Válidos                    | 1310                |    |                                             |                     |                    |

a. 0 células (,0%) esperavam uma contagem menor que 5. A contagem mínima esperada é 19,58.

b. Computado apenas para uma tabela 2x2

### Medidas Simétricas

|                     |             | Valor | Significância<br>Aproximada |
|---------------------|-------------|-------|-----------------------------|
| Nominal por Nominal | Fi          | -,098 | ,000                        |
|                     | V de Cramer | ,098  | ,000                        |
| N de Casos Válidos  |             | 1310  |                             |

### Estimativa de Risco

| Valor | Intervalo de confiança de 95% |          |
|-------|-------------------------------|----------|
|       | Inferior                      | Superior |

|                                                                               |       |       |       |
|-------------------------------------------------------------------------------|-------|-------|-------|
| Razão de Chances para Sex<br>(Male / Female)                                  | ,450  | ,287  | ,706  |
| Para grupo Cumulative weekly<br>workload < or >= 90h<br>(dichotomous) = <=90H | ,936  | ,895  | ,979  |
| Para grupo Cumulative weekly<br>workload < or >= 90h<br>(dichotomous) = >90H  | 2,082 | 1,384 | 3,132 |
| N de Casos Válidos                                                            | 1310  |       |       |

\*Nonparametric Tests: Independent Samples.

NPTESTS

/INDEPENDENT TEST (OLBI\_D OLBI\_E) GROUP (ComorbAny)

/MISSING SCOPE=ANALYSIS USERMISSING=EXCLUDE

/CRITERIA ALPHA=0.05 CILEVEL=95.

Testes não paramétricos

### Observações

|              |                                             |                                                                                                                                                            |
|--------------|---------------------------------------------|------------------------------------------------------------------------------------------------------------------------------------------------------------|
| Saída criada |                                             | 21-SEP-2020 00:23:28                                                                                                                                       |
| Comentários  |                                             |                                                                                                                                                            |
| Entrada      | Dados                                       | C:\Users\User\Documents\Pesquisa\Fellow\FellowGenData_V1.sav                                                                                               |
|              | Conjunto de dados ativo                     | ConjuntodeDados1                                                                                                                                           |
|              | Filtro                                      | <none>                                                                                                                                                     |
|              | Ponderação                                  | <none>                                                                                                                                                     |
|              | Arquivo Dividido                            | <none>                                                                                                                                                     |
|              | N de linhas em arquivo de dados de trabalho | 1313                                                                                                                                                       |
| Sintaxe      |                                             | NPTESTS<br>/INDEPENDENT TEST (OLBI_D<br>OLBI_E) GROUP (ComorbAny)<br>/MISSING SCOPE=ANALYSIS<br>USERMISSING=EXCLUDE<br>/CRITERIA ALPHA=0.05<br>CILEVEL=95. |
| Recursos     | Tempo do processador                        | 00:00:00,11                                                                                                                                                |
|              | Tempo decorrido                             | 00:00:00,12                                                                                                                                                |

null : null

Resumo de Teste de Hipótese

|   | Hipótese nula                                                                                                        | Teste                                             | Sig. | Decisão                   |
|---|----------------------------------------------------------------------------------------------------------------------|---------------------------------------------------|------|---------------------------|
| 1 | A distribuição de OLBI Disengagement Score é a mesma entre as categorias de Any comorbidity (regardless COVID risk). | Teste U de Mann-Whitney de amostras independentes | ,000 | Rejeitar a hipótese nula. |
| 2 | A distribuição de OLBI Exhaustion Score é a mesma entre as categorias de Any comorbidity (regardless COVID risk).    | Teste U de Mann-Whitney de amostras independentes | ,000 | Rejeitar a hipótese nula. |

São exibidas significâncias assintóticas. O nível de significância é ,05.

## Teste U de Mann-Whitney de amostras independentes

Any comorbidity (regardless COVID risk)

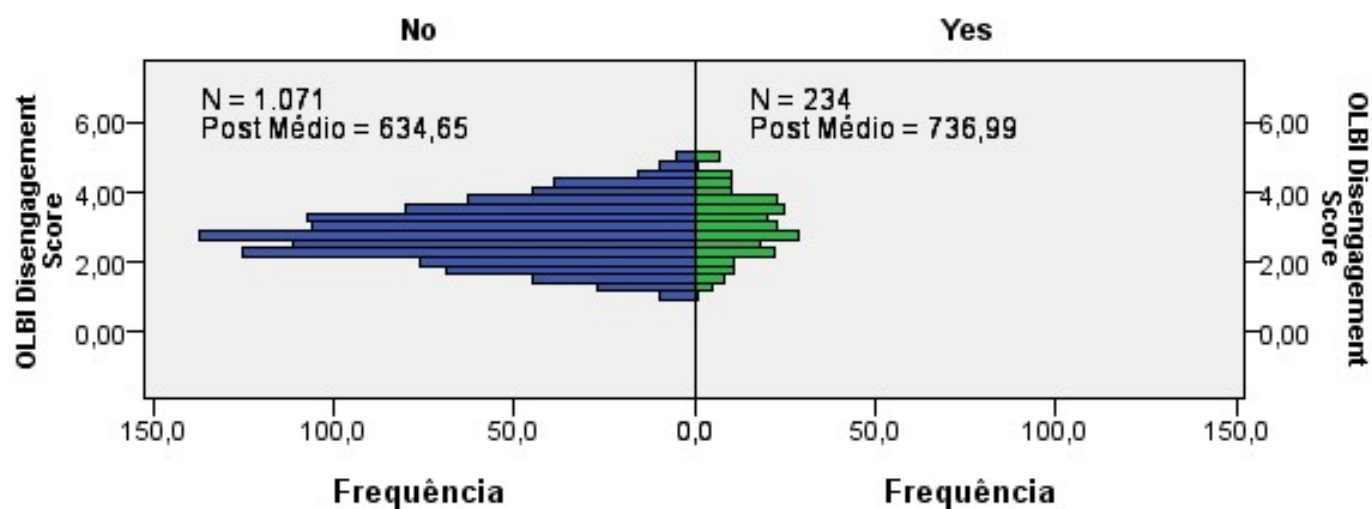

|                                            |             |
|--------------------------------------------|-------------|
| <b>N total</b>                             | 1.305       |
| <b>U de Mann-Whitney</b>                   | 144.960,000 |
| <b>Wilcoxon W</b>                          | 172.455,000 |
| <b>Estatística de teste</b>                | 144.960,000 |
| <b>Erro padrão</b>                         | 5.217,247   |
| <b>Estatística de Teste Padronizado</b>    | 3,767       |
| <b>Sig. assintótico (teste de 2 lados)</b> | ,000        |

## Teste U de Mann-Whitney de amostras independentes

Any comorbidity (regardless COVID risk)

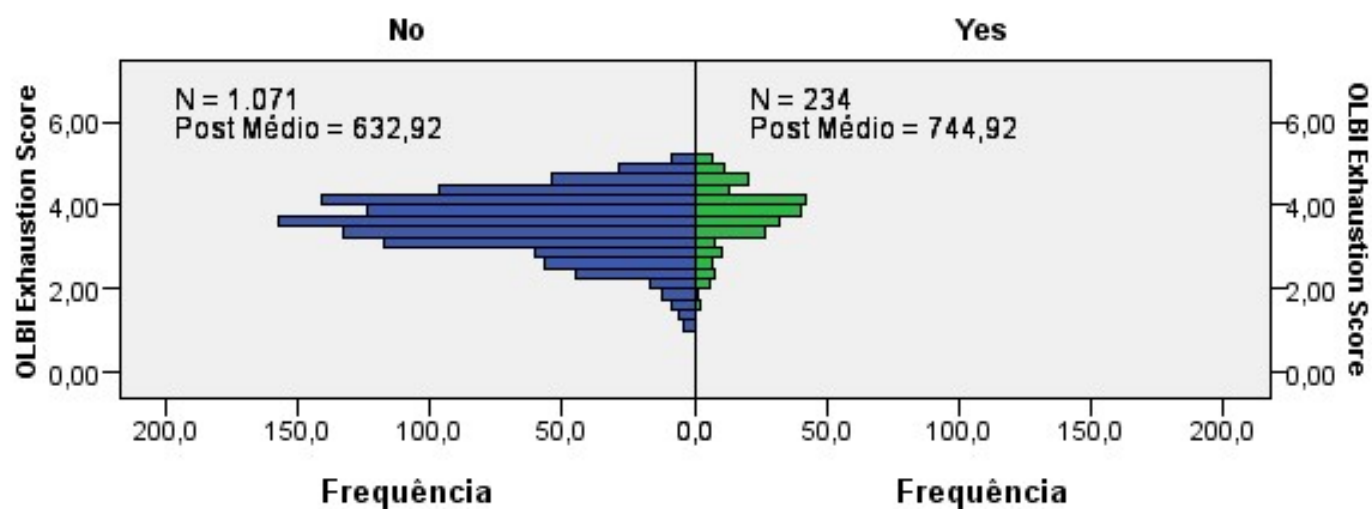

|                                            |             |
|--------------------------------------------|-------------|
| <b>N total</b>                             | 1.305       |
| <b>U de Mann-Whitney</b>                   | 146.816,000 |
| <b>Wilcoxon W</b>                          | 174.311,000 |
| <b>Estatística de teste</b>                | 146.816,000 |
| <b>Erro padrão</b>                         | 5.217,874   |
| <b>Estatística de Teste Padronizado</b>    | 4,122       |
| <b>Sig. assintótico (teste de 2 lados)</b> | ,000        |

### Observações

|              |                         |                                                              |
|--------------|-------------------------|--------------------------------------------------------------|
| Saída criada |                         | 21-SEP-2020 00:31:57                                         |
| Comentários  |                         |                                                              |
| Entrada      | Dados                   | C:\Users\User\Documents\Pesquisa\Fellow\FellowGenData_V1.sav |
|              | Conjunto de dados ativo | ConjuntodeDados1                                             |
|              | Filtro                  | <none>                                                       |

|          |                                             |                                                                                   |
|----------|---------------------------------------------|-----------------------------------------------------------------------------------|
|          | Ponderação                                  | <none>                                                                            |
|          | Arquivo Dividido                            | <none>                                                                            |
|          | N de linhas em arquivo de dados de trabalho | 1313                                                                              |
| Sintaxe  |                                             | GRAPH<br><br>/SCATTERPLOT(BIVAR)=BRCS_S<br>core WITH OLBI_D<br>/MISSING=LISTWISE. |
| Recursos | Tempo do processador                        | 00:00:00,22                                                                       |
|          | Tempo decorrido                             | 00:00:00,22                                                                       |

T-TEST GROUPS=BRCS\_Classif(0 1)  
/MISSING=ANALYSIS  
/VARIABLES=OLBI\_D OLBI\_E  
/CRITERIA=CI(.95).

Teste-T

### Observações

|                             |                                             |                                                                                                                                    |
|-----------------------------|---------------------------------------------|------------------------------------------------------------------------------------------------------------------------------------|
| Saída criada                |                                             | 21-SEP-2020 00:48:00                                                                                                               |
| Comentários                 |                                             |                                                                                                                                    |
| Entrada                     | Dados                                       | C:\Users\User\Documents\Pesquisa\Fellow\FellowGenData_V1.sav                                                                       |
|                             | Conjunto de dados ativo                     | ConjuntodeDados1                                                                                                                   |
|                             | Filtro                                      | <none>                                                                                                                             |
|                             | Ponderação                                  | <none>                                                                                                                             |
|                             | Arquivo Dividido                            | <none>                                                                                                                             |
|                             | N de linhas em arquivo de dados de trabalho | 1313                                                                                                                               |
| Tratamento de valor omissos | Definição de omissos                        | Os valores omissos definidos pelo usuário são tratados como omissos.                                                               |
|                             | Casos utilizados                            | As estatísticas para cada análise são baseadas nos casos sem dados omissos ou fora do intervalo para qualquer variável da análise. |
| Sintaxe                     |                                             | T-TEST<br>GROUPS=BRCS_Classif(0 1)<br>/MISSING=ANALYSIS<br>/VARIABLES=OLBI_D OLBI_E<br>/CRITERIA=CI(.95).                          |
| Recursos                    | Tempo do processador                        | 00:00:00,02                                                                                                                        |
|                             | Tempo decorrido                             | 00:00:00,01                                                                                                                        |

| Estatísticas de grupo    |                     |     |        |             |                      |
|--------------------------|---------------------|-----|--------|-------------|----------------------|
|                          | BRCS Classification | N   | Média  | Erro Desvio | Erro padrão da média |
| OLBI Disengagement Score | Low resilience      | 813 | 2,9845 | ,79388      | ,02784               |
|                          | Moderate to High    | 500 | 2,4318 | ,79865      | ,03572               |
| OLBI Exhaustion Score    | Low resilience      | 813 | 3,7136 | ,68374      | ,02398               |
|                          | Moderate to High    | 500 | 3,2961 | ,74592      | ,03336               |

| Teste de amostras independentes |                                 |                                              |      |                                  |          |                       |                 |                          |                                         |
|---------------------------------|---------------------------------|----------------------------------------------|------|----------------------------------|----------|-----------------------|-----------------|--------------------------|-----------------------------------------|
|                                 |                                 | Teste de Levene para igualdade de variâncias |      | teste-t para Igualdade de Médias |          |                       |                 |                          |                                         |
|                                 |                                 | Z                                            | Sig. | t                                | df       | Sig. (2 extremidades) | Diferença média | Erro padrão de diferença | 95% Intervalo de Confiança da Diferença |
|                                 |                                 |                                              |      |                                  |          |                       |                 |                          | Inferior Superior                       |
| OLBI Disengagement Score        | Variâncias iguais assumidas     | ,003                                         | ,956 | 12,222                           | 1311     | ,000                  | ,55272          | ,04522                   | ,46401 ,64144                           |
|                                 | Variâncias iguais não assumidas |                                              |      | 12,205                           | 1051,189 | ,000                  | ,55272          | ,04529                   | ,46386 ,64158                           |
| OLBI Exhaustion Score           | Variâncias iguais assumidas     | 3,554                                        | ,060 | 10,373                           | 1311     | ,000                  | ,41743          | ,04024                   | ,33848 ,49637                           |
|                                 | Variâncias iguais não assumidas |                                              |      | 10,161                           | 986,138  | ,000                  | ,41743          | ,04108                   | ,33681 ,49805                           |

```

*Nonparametric Tests: Independent Samples.
NPTESTS
  /INDEPENDENT TEST (OLBI_D OLBI_E) GROUP (Autonomy_Classif)
  /MISSING SCOPE=ANALYSIS USERMISSING=EXCLUDE
  /CRITERIA ALPHA=0.05 CILEVEL=95.

```

Testes não paramétricos

| Observações  |                                             |                                                               |
|--------------|---------------------------------------------|---------------------------------------------------------------|
| Saída criada | 21-SEP-2020 00:51:00                        |                                                               |
| Comentários  |                                             |                                                               |
| Entrada      | Dados                                       | C:\Users\User\Documents\Pesquis a\Fellow\FellowGenData_V1.sav |
|              | Conjunto de dados ativo                     | ConjuntodeDados1                                              |
|              | Filtro                                      | <none>                                                        |
|              | Ponderação                                  | <none>                                                        |
|              | Arquivo Dividido                            | <none>                                                        |
|              | N de linhas em arquivo de dados de trabalho | 1313                                                          |
|              |                                             |                                                               |

Sintaxe

```
NPTESTS
  /INDEPENDENT TEST (OLBI_D
OLBI_E) GROUP
(Autonomy_Classif)
  /MISSING SCOPE=ANALYSIS
USERMISSING=EXCLUDE
  /CRITERIA ALPHA=0.05
CILEVEL=95.
```

Recursos

Tempo do processador

00:00:00,14

Tempo decorrido

00:00:00,12

null : null

### Resumo de Teste de Hipótese

|   | Hipótese nula                                                                                                                                                  | Teste                                             | Sig. | Decisão                   |
|---|----------------------------------------------------------------------------------------------------------------------------------------------------------------|---------------------------------------------------|------|---------------------------|
| 1 | A distribuição de OLBI Disengagement Score é a mesma entre as categorias de Classification of the perceived autonomy to self-conduct in the residency program. | Teste U de Mann-Whitney de amostras independentes | ,000 | Rejeitar a hipótese nula. |
| 2 | A distribuição de OLBI Exhaustion Score é a mesma entre as categorias de Classification of the perceived autonomy to self-conduct in the residency program.    | Teste U de Mann-Whitney de amostras independentes | ,000 | Rejeitar a hipótese nula. |

São exibidas significâncias assintóticas. O nível de significância é ,05.

## Teste U de Mann-Whitney de amostras independentes

Classification of the percieved autonomy to self-conduct in the residency program

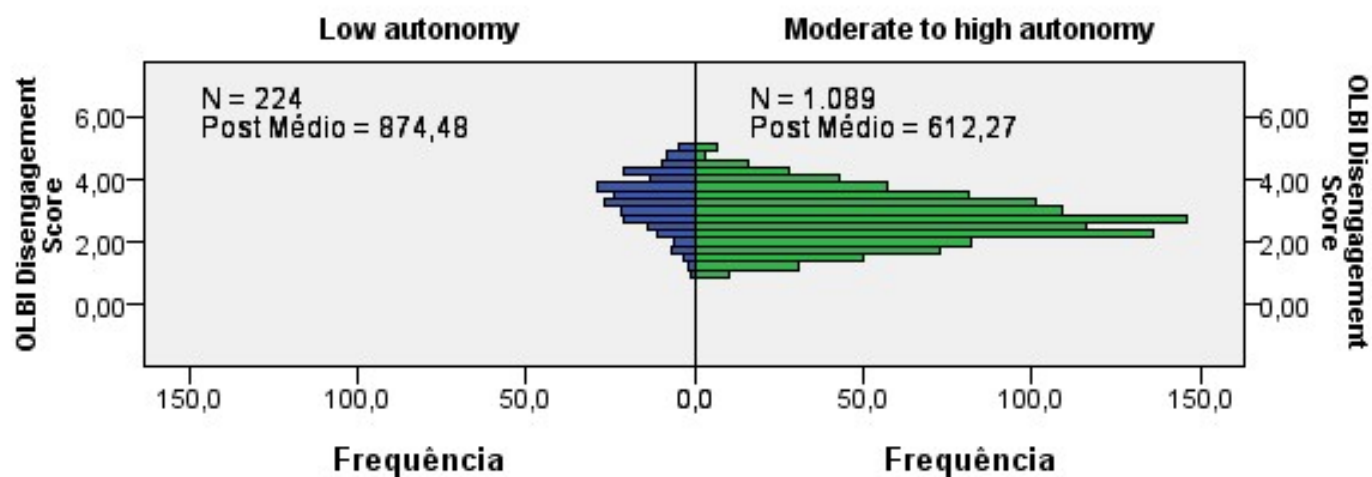

|                                            |             |
|--------------------------------------------|-------------|
| <b>N total</b>                             | 1.313       |
| <b>U de Mann-Whitney</b>                   | 73.253,500  |
| <b>Wilcoxon W</b>                          | 666.758,500 |
| <b>Estatística de teste</b>                | 73.253,500  |
| <b>Erro padrão</b>                         | 5.163,021   |
| <b>Estatística de Teste Padronizado</b>    | -9,435      |
| <b>Sig. assintótico (teste de 2 lados)</b> | ,000        |

## Teste U de Mann-Whitney de amostras independentes

Classification of the percieved autonomy to self-conduct in the residency program

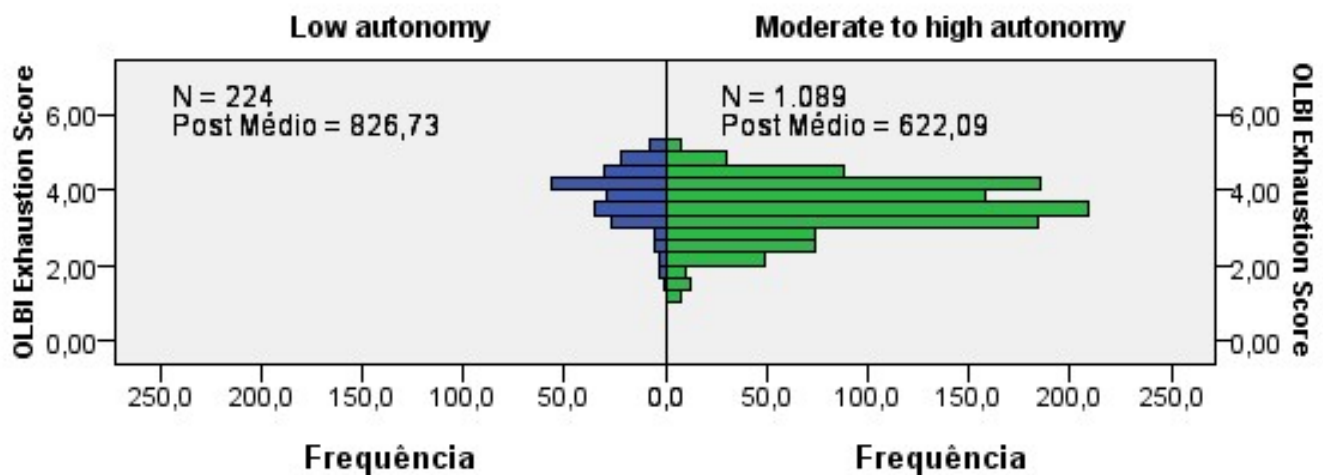

|                                            |             |
|--------------------------------------------|-------------|
| <b>N total</b>                             | 1.313       |
| <b>U de Mann-Whitney</b>                   | 83.949,500  |
| <b>Wilcoxon W</b>                          | 677.454,500 |
| <b>Estatística de teste</b>                | 83.949,500  |
| <b>Erro padrão</b>                         | 5.163,567   |
| <b>Estatística de Teste Padronizado</b>    | -7,363      |
| <b>Sig. assintótico (teste de 2 lados)</b> | ,000        |

T-TEST GROUPS=PedagStr\_Classif(0 1)  
 /MISSING=ANALYSIS  
 /VARIABLES=OLBI\_D OLBI\_E  
 /CRITERIA=CI(.95).

## Observações

|                             |                                                |                                                                                                                                             |
|-----------------------------|------------------------------------------------|---------------------------------------------------------------------------------------------------------------------------------------------|
| Saída criada                |                                                | 21-SEP-2020 00:52:37                                                                                                                        |
| Comentários                 |                                                |                                                                                                                                             |
| Entrada                     | Dados                                          | C:\Users\User\Documents\Pesquis<br>a\Fellow\FellowGenData_V1.sav                                                                            |
|                             | Conjunto de dados ativo                        | ConjuntodeDados1                                                                                                                            |
|                             | Filtro                                         | <none>                                                                                                                                      |
|                             | Ponderação                                     | <none>                                                                                                                                      |
|                             | Arquivo Dividido                               | <none>                                                                                                                                      |
|                             | N de linhas em arquivo de dados<br>de trabalho | 1313                                                                                                                                        |
| Tratamento de valor omissos | Definição de omissos                           | Os valores omissos definidos pelo<br>usuário são tratados como<br>omissos.                                                                  |
|                             | Casos utilizados                               | As estatísticas para cada análise<br>são baseadas nos casos sem<br>dados omissos ou fora do intervalo<br>para qualquer variável da análise. |
| Sintaxe                     |                                                | T-TEST<br>GROUPS=PedagStr_Classif(0 1)<br>/MISSING=ANALYSIS<br>/VARIABLES=OLBI_D OLBI_E<br>/CRITERIA=CI(.95).                               |
| Recursos                    | Tempo do processador                           | 00:00:00,00                                                                                                                                 |
|                             | Tempo decorrido                                | 00:00:00,02                                                                                                                                 |

## Estatísticas de grupo

|                          | Percieved adequacy of the<br>pedagogic structure and<br>availability of resouces in the<br>residency program | N   | Média  | Erro Desvio | Erro padrão da<br>média |
|--------------------------|--------------------------------------------------------------------------------------------------------------|-----|--------|-------------|-------------------------|
| OLBI Disengagement Score | Poor adequacy                                                                                                | 558 | 3,1254 | ,78926      | ,03341                  |
|                          | Moderate to good adequacy                                                                                    | 755 | 2,5142 | ,77919      | ,02836                  |
| OLBI Exhaustion Score    | Poor adequacy                                                                                                | 558 | 3,8236 | ,65989      | ,02794                  |
|                          | Moderate to good adequacy                                                                                    | 755 | 3,3558 | ,72694      | ,02646                  |

## Teste de amostras independentes

| Teste de amostras independentes |                             |                                   |      |                                  |      |         |                 |                |          |          |
|---------------------------------|-----------------------------|-----------------------------------|------|----------------------------------|------|---------|-----------------|----------------|----------|----------|
|                                 |                             | Teste de Levene para igualdade de |      | teste-t para Igualdade de Médias |      |         |                 |                |          |          |
|                                 |                             | variâncias                        |      | 95% Intervalo de Confiança da    |      |         |                 |                |          |          |
|                                 |                             |                                   |      | Diferença                        |      |         |                 |                |          |          |
|                                 |                             |                                   |      | Sig. (2                          |      |         |                 |                |          |          |
|                                 |                             |                                   |      | extremidades)                    |      |         |                 |                |          |          |
|                                 |                             |                                   |      | Erro padrão de                   |      |         |                 |                |          |          |
|                                 |                             |                                   |      | Diferença                        |      |         |                 |                |          |          |
|                                 |                             |                                   |      | Inferior                         |      |         |                 |                |          |          |
|                                 |                             |                                   |      | Superior                         |      |         |                 |                |          |          |
|                                 |                             | Z                                 | Sig. | t                                | df   | Sig. (2 | Diferença média | erro padrão de | Inferior | Superior |
| OLBI Disengagement Score        | Variâncias iguais assumidas | .213                              | .644 | 13.974                           | 1311 | .000    | .61121          | .04374         | .52540   | .69702   |

|                       |                                 |       |      |        |          |      |        |        |        |        |
|-----------------------|---------------------------------|-------|------|--------|----------|------|--------|--------|--------|--------|
|                       | Variâncias iguais não assumidas |       |      | 13,947 | 1191,689 | ,000 | ,61121 | ,04382 | ,52523 | ,69719 |
| OLBI Exhaustion Score | Variâncias iguais assumidas     | 5,342 | ,021 | 11,982 | 1311     | ,000 | ,46774 | ,03904 | ,39116 | ,54432 |
|                       | Variâncias iguais não assumidas |       |      | 12,157 | 1257,148 | ,000 | ,46774 | ,03847 | ,39226 | ,54322 |

```

*Nonparametric Tests: Independent Samples.
NPTESTS
  /INDEPENDENT TEST (OLBI_D OLBI_E) GROUP (PPEAvail_Classif)
  /MISSING SCOPE=ANALYSIS USERMISSING=EXCLUDE
  /CRITERIA ALPHA=0.05  CILEVEL=95.

```

Testes não paramétricos

| Observações  |                                             |                                                                                                                                                             |
|--------------|---------------------------------------------|-------------------------------------------------------------------------------------------------------------------------------------------------------------|
| Saída criada |                                             | 21-SEP-2020 00:55:54                                                                                                                                        |
| Comentários  |                                             |                                                                                                                                                             |
| Entrada      | Dados                                       | C:\Users\User\Documents\Pesquisa\Fellow\FellowGenData_V1.sav                                                                                                |
|              | Conjunto de dados ativo                     | ConjuntodeDados1                                                                                                                                            |
|              | Filtro                                      | <none>                                                                                                                                                      |
|              | Ponderação                                  | <none>                                                                                                                                                      |
|              | Arquivo Dividido                            | <none>                                                                                                                                                      |
|              | N de linhas em arquivo de dados de trabalho | 1313                                                                                                                                                        |
|              | Sintaxe                                     | NPTESTS<br>/INDEPENDENT TEST (OLBI_D OLBI_E) GROUP (PPEAvail_Classif)<br>/MISSING SCOPE=ANALYSIS USERMISSING=EXCLUDE<br>/CRITERIA ALPHA=0.05<br>CILEVEL=95. |
| Recursos     | Tempo do processador                        | 00:00:00,14                                                                                                                                                 |
|              | Tempo decorrido                             | 00:00:00,12                                                                                                                                                 |

null : null

Resumo de Teste de Hipótese

|   | Hipótese nula                                                                                                                                                                                                   | Teste                                             | Sig. | Decisão                   |
|---|-----------------------------------------------------------------------------------------------------------------------------------------------------------------------------------------------------------------|---------------------------------------------------|------|---------------------------|
| 1 | A distribuição de OLBI Disengagement Score é a mesma entre as categorias de Perceived adequacy of the availability of personal protective equipment, when providing care for patients in the residency program. | Teste U de Mann-Whitney de amostras independentes | ,000 | Rejeitar a hipótese nula. |
| 2 | A distribuição de OLBI Exhaustion Score é a mesma entre as categorias de Perceived adequacy of the availability of personal protective equipment, when providing care for patients in the residency program.    | Teste U de Mann-Whitney de amostras independentes | ,000 | Rejeitar a hipótese nula. |

São exibidas significâncias assintóticas. O nível de significância é ,05.

## Teste U de Mann-Whitney de amostras independentes

Perceived adequacy of the availability of personal protective equipment, when providing care for patients in the residency ...

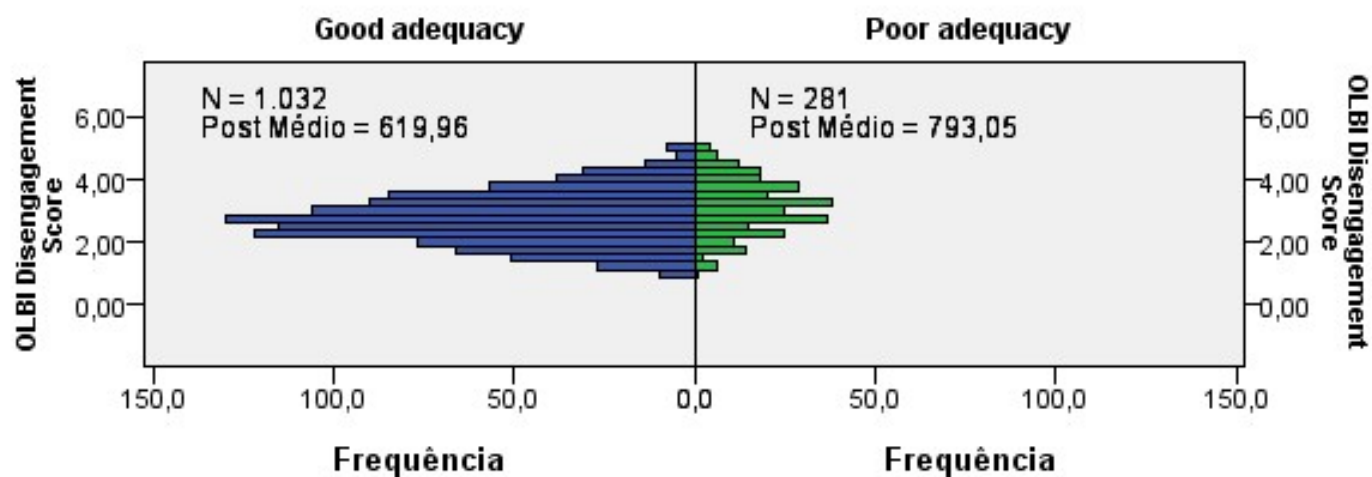

|                                            |             |
|--------------------------------------------|-------------|
| <b>N total</b>                             | 1.313       |
| <b>U de Mann-Whitney</b>                   | 106.767,000 |
| <b>Wilcoxon W</b>                          | 639.795,000 |
| <b>Estatística de teste</b>                | 106.767,000 |
| <b>Erro padrão</b>                         | 5.629,359   |
| <b>Estatística de Teste Padronizado</b>    | -6,791      |
| <b>Sig. assintótico (teste de 2 lados)</b> | ,000        |

## Teste U de Mann-Whitney de amostras independentes

Perceived adequacy of the availability of personal protective equipment, when providing care for patients in the residency ...

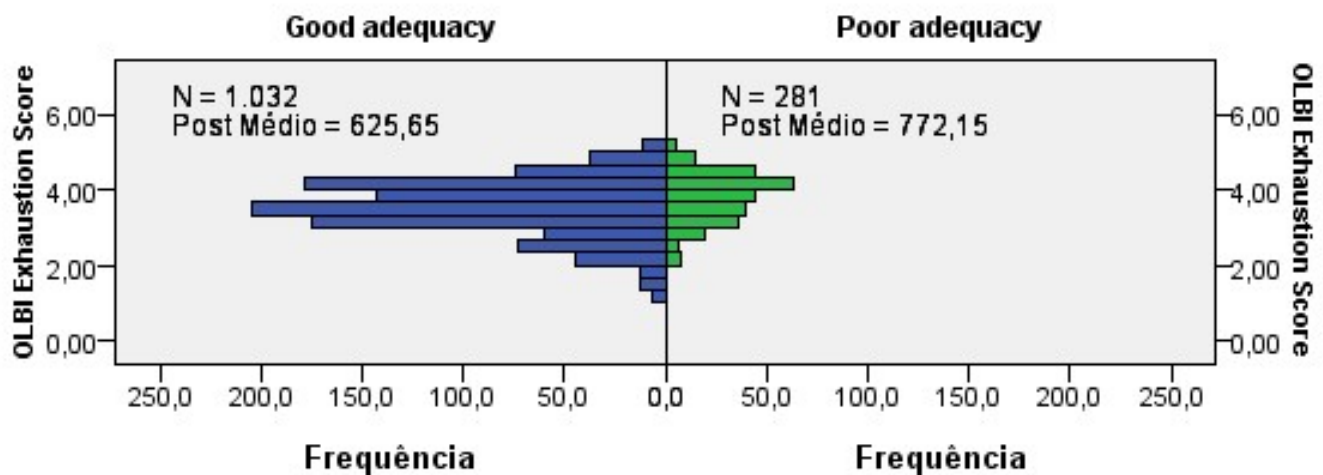

|                                            |             |
|--------------------------------------------|-------------|
| <b>N total</b>                             | 1.313       |
| <b>U de Mann-Whitney</b>                   | 112.638,500 |
| <b>Wilcoxon W</b>                          | 645.666,500 |
| <b>Estatística de teste</b>                | 112.638,500 |
| <b>Erro padrão</b>                         | 5.629,954   |
| <b>Estatística de Teste Padronizado</b>    | -5,747      |
| <b>Sig. assintótico (teste de 2 lados)</b> | ,000        |

T-TEST GROUPS=Wkload\_6060(0 1)  
 /MISSING=ANALYSIS  
 /VARIABLES=OLBI\_D OLBI\_E  
 /CRITERIA=CI(.95).

## Observações

|                             |                                             |                                                                                                                                    |
|-----------------------------|---------------------------------------------|------------------------------------------------------------------------------------------------------------------------------------|
| Saída criada                |                                             | 21-SEP-2020 00:58:11                                                                                                               |
| Comentários                 |                                             |                                                                                                                                    |
| Entrada                     | Dados                                       | C:\Users\User\Documents\Pesquisa\Fellow\FellowGenData_V1.sav                                                                       |
|                             | Conjunto de dados ativo                     | ConjuntodeDados1                                                                                                                   |
|                             | Filtro                                      | <none>                                                                                                                             |
|                             | Ponderação                                  | <none>                                                                                                                             |
|                             | Arquivo Dividido                            | <none>                                                                                                                             |
|                             | N de linhas em arquivo de dados de trabalho | 1313                                                                                                                               |
| Tratamento de valor omissos | Definição de omissos                        | Os valores omissos definidos pelo usuário são tratados como omissos.                                                               |
|                             | Casos utilizados                            | As estatísticas para cada análise são baseadas nos casos sem dados omissos ou fora do intervalo para qualquer variável da análise. |
| Sintaxe                     |                                             | T-TEST GROUPS=Wkload_6060(0 1)<br><br>/MISSING=ANALYSIS<br>/VARIABLES=OLBI_D OLBI_E<br>/CRITERIA=CI(.95).                          |
| Recursos                    | Tempo do processador                        | 00:00:00,02                                                                                                                        |
|                             | Tempo decorrido                             | 00:00:00,02                                                                                                                        |

## Estatísticas de grupo

|                          | Cumulative weekly workload < or >= 60h (dichotomous) | N   | Média  | Erro Desvio | Erro padrão da média |
|--------------------------|------------------------------------------------------|-----|--------|-------------|----------------------|
| OLBI Disengagement Score | <=60h                                                | 541 | 2,7426 | ,83801      | ,03603               |
|                          | >60h                                                 | 772 | 2,7960 | ,84037      | ,03025               |
| OLBI Exhaustion Score    | <=60h                                                | 541 | 3,4599 | ,75677      | ,03254               |
|                          | >60h                                                 | 772 | 3,6210 | ,71457      | ,02572               |

## Teste de amostras independentes

|                          |                                 | Teste de Levene para igualdade de variâncias |      |        |          | teste-t para igualdade de Médias |                 |                          |                                         |          |
|--------------------------|---------------------------------|----------------------------------------------|------|--------|----------|----------------------------------|-----------------|--------------------------|-----------------------------------------|----------|
|                          |                                 | Z                                            | Sig. | t      | df       | Sig. (2 extremidades)            | Diferença média | Erro padrão de diferença | 95% Intervalo de Confiança da Diferença |          |
|                          |                                 |                                              |      |        |          |                                  |                 |                          | Inferior                                | Superior |
| OLBI Disengagement Score | Variâncias iguais assumidas     | ,283                                         | ,595 | -1,134 | 1311     | ,257                             | -,05338         | ,04706                   | -,14571                                 | ,03895   |
|                          | Variâncias iguais não assumidas |                                              |      | -1,135 | 1164,298 | ,257                             | -,05338         | ,04704                   | -,14567                                 | ,03892   |

|                       |                                 |       |      |        |          |      |         |        |         |         |
|-----------------------|---------------------------------|-------|------|--------|----------|------|---------|--------|---------|---------|
| OLBI Exhaustion Score | Variâncias iguais assumidas     | 2,636 | ,105 | -3,925 | 1311     | ,000 | -,16113 | ,04106 | -,24167 | -,08058 |
|                       | Variâncias iguais não assumidas |       |      | -3,885 | 1119,504 | ,000 | -,16113 | ,04147 | -,24250 | -,07975 |

```
*Nonparametric Tests: Independent Samples.
NPTESTS
/INDEPENDENT TEST (OLBI_D OLBI_E) GROUP (Wkload_9090)
/MISSING SCOPE=ANALYSIS USERMISSING=EXCLUDE
/CRITERIA ALPHA=0.05 CILEVEL=95.
```

Testes não paramétricos

| Observações  |                                                |                                                                                                                                                              |
|--------------|------------------------------------------------|--------------------------------------------------------------------------------------------------------------------------------------------------------------|
| Saída criada |                                                | 21-SEP-2020 00:59:18                                                                                                                                         |
| Comentários  |                                                |                                                                                                                                                              |
| Entrada      | Dados                                          | C:\Users\User\Documents\Pesquis<br>a\Fellow\FellowGenData_V1.sav                                                                                             |
|              | Conjunto de dados ativo                        | ConjuntodeDados1                                                                                                                                             |
|              | Filtro                                         | <none>                                                                                                                                                       |
|              | Ponderação                                     | <none>                                                                                                                                                       |
|              | Arquivo Dividido                               | <none>                                                                                                                                                       |
|              | N de linhas em arquivo de dados<br>de trabalho | 1313                                                                                                                                                         |
| Sintaxe      |                                                | NPTESTS<br>/INDEPENDENT TEST (OLBI_D<br>OLBI_E) GROUP (Wkload_9090)<br>/MISSING SCOPE=ANALYSIS<br>USERMISSING=EXCLUDE<br>/CRITERIA ALPHA=0.05<br>CILEVEL=95. |
| Recursos     | Tempo do processador                           | 00:00:00,13                                                                                                                                                  |
|              | Tempo decorrido                                | 00:00:00,13                                                                                                                                                  |

null : null

### Resumo de Teste de Hipótese

|   | Hipótese nula                                                                                                                     | Teste                                             | Sig. | Decisão                   |
|---|-----------------------------------------------------------------------------------------------------------------------------------|---------------------------------------------------|------|---------------------------|
| 1 | A distribuição de OLBI Disengagement Score é a mesma entre as categorias de Cumulative weekly workload < or >= 90h (dichotomous). | Teste U de Mann-Whitney de amostras independentes | ,002 | Rejeitar a hipótese nula. |
| 2 | A distribuição de OLBI Exhaustion Score é a mesma entre as categorias de Cumulative weekly workload < or >= 90h (dichotomous).    | Teste U de Mann-Whitney de amostras independentes | ,000 | Rejeitar a hipótese nula. |

São exibidas significâncias assintóticas. O nível de significância é ,05.

## Teste U de Mann-Whitney de amostras independentes

Cumulative weekly workload < or >= 90h (dichotomous)

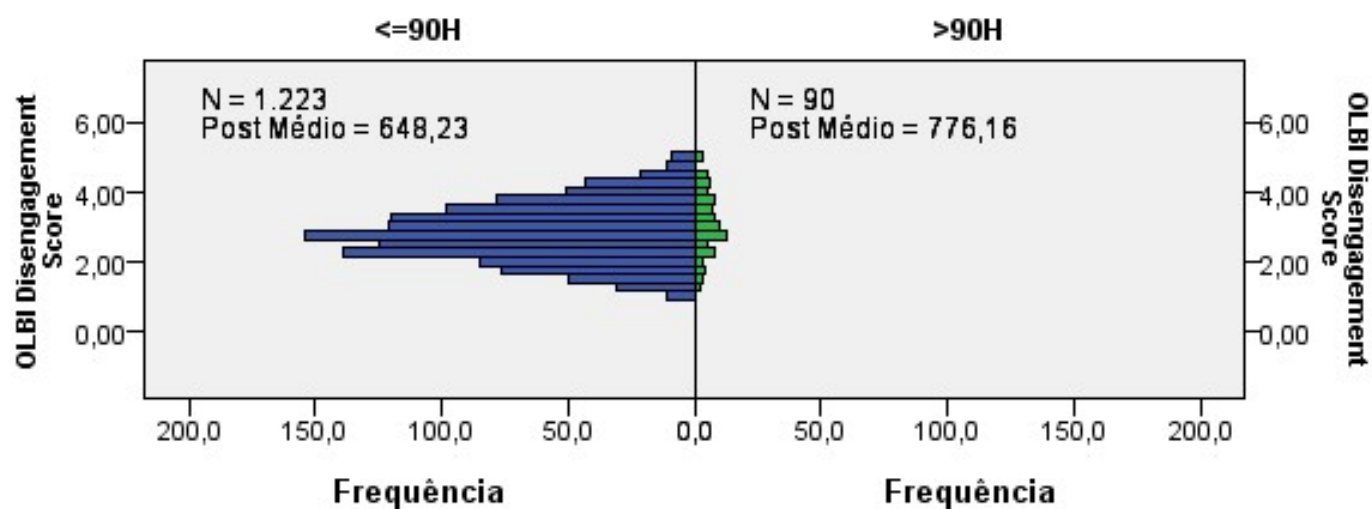

|                                            |            |
|--------------------------------------------|------------|
| <b>N total</b>                             | 1.313      |
| <b>U de Mann-Whitney</b>                   | 65.759,500 |
| <b>Wilcoxon W</b>                          | 69.854,500 |
| <b>Estatística de teste</b>                | 65.759,500 |
| <b>Erro padrão</b>                         | 3.468,170  |
| <b>Estatística de Teste Padronizado</b>    | 3,092      |
| <b>Sig. assintótico (teste de 2 lados)</b> | ,002       |

## Teste U de Mann-Whitney de amostras independentes

Cumulative weekly workload < or >= 90h (dichotomous)

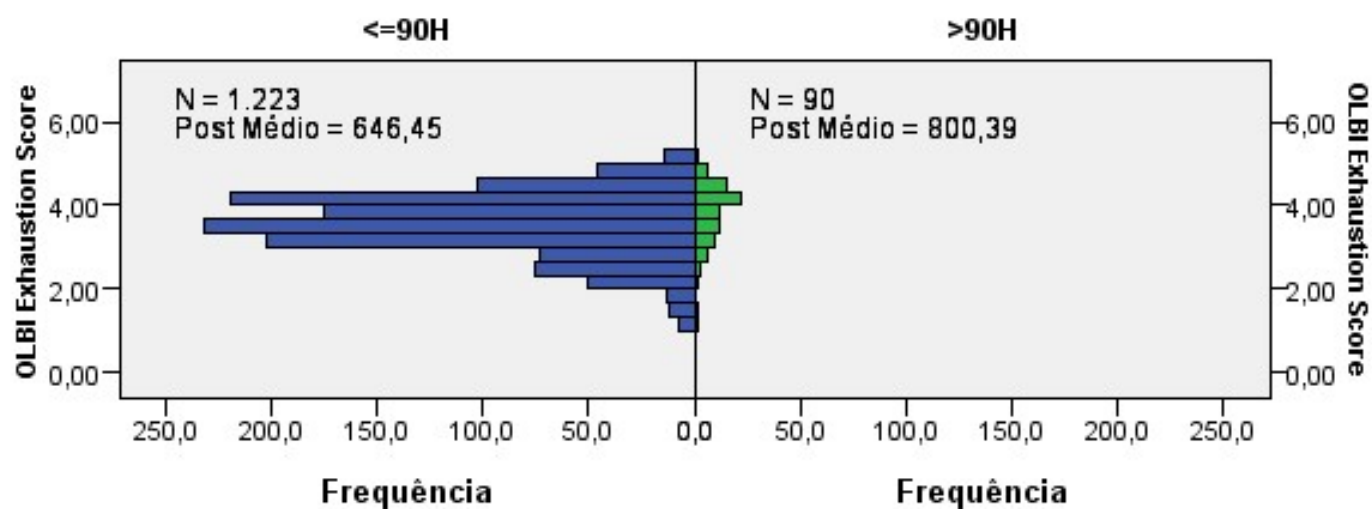

|                                            |            |
|--------------------------------------------|------------|
| <b>N total</b>                             | 1.313      |
| <b>U de Mann-Whitney</b>                   | 67.940,500 |
| <b>Wilcoxon W</b>                          | 72.035,500 |
| <b>Estatística de teste</b>                | 67.940,500 |
| <b>Erro padrão</b>                         | 3.468,537  |
| <b>Estatística de Teste Padronizado</b>    | 3,721      |
| <b>Sig. assintótico (teste de 2 lados)</b> | ,000       |
